# Supplementary material for: Developmental variability channels mouse molar evolution
Source: eLife journal article supplement (doi:10.7554/elife.50103), 2020-02-12
Supplement: supp [file elife-50103-supp-v1.zip]

Archive with 15 entries (15 files):
- elife_poa_e50103_Figure_4_figure_supplement_2.pdf
- elife_poa_e50103_Supplementary_file_3.docx
- elife_poa_e50103_Figure_3_figure_supplement_2.pdf
- elife_poa_e50103_Figure_3_figure_supplement_3.pdf
- elife_poa_e50103_Supplementary_file_4.docx
- elife_poa_e50103_Figure_2_figure_supplement_1.pdf
- elife_poa_e50103_Figure_3_figure_supplement_1.pdf
- elife_poa_e50103_Figure_6_figure_supplement_1.pdf
- elife_poa_e50103_Figure_2_figure_supplement_3.pdf
- elife_poa_e50103_Figure_4_figure_supplement_1.pdf
- elife_poa_e50103_Figure_1_figure_supplement_1.pdf
- elife_poa_e50103_Supplementary_file_1.docx
- elife_poa_e50103_Transparent_Reporting_File.pdf
- elife_poa_e50103_Figure_2_figure_supplement_2.pdf
- elife_poa_e50103_Supplementary_file_2.xlsx
