# Supplementary material for: Developmental variability channels mouse molar evolution
Source: eLife journal article supplement (doi:10.7554/elife.50103), 2020-02-12
Supplement: supp [file elife-50103-supp-v1.zip › elife_poa_e50103_Figure_3_figure_supplement_3.pdf]

Molar developmental state

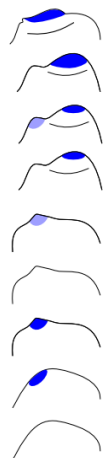

331\_0\_2\_2\_1  
235\_0\_2\_1\_1  
216\_1\_1\_1\_1  
211\_0\_1\_1\_1  
168\_1\_0\_0\_1  
168\_0\_0\_0\_1  
143\_2\_0\_0\_1  
120\_2\_0\_0\_0  
097\_0\_0\_0\_0

DUHi

**Individual  
Toothgerm**

• DUHi  
• FVB

**Developmental  
Space**

Both strains

DUHi only

FVB

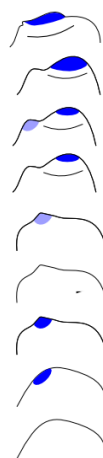

331\_0\_2\_2\_1  
235\_0\_2\_1\_1  
216\_1\_1\_1\_1  
211\_0\_1\_1\_1  
168\_1\_0\_0\_1  
168\_0\_0\_0\_1  
143\_2\_0\_0\_1  
120\_2\_0\_0\_0  
097\_0\_0\_0\_0

13

Computed Embryo Age (cdpc)

14

15

16
