# Supplementary material for: Developmental variability channels mouse molar evolution
Source: eLife journal article supplement (doi:10.7554/elife.50103), 2020-02-12
Supplement: supp [file elife-50103-supp-v1.zip › elife_poa_e50103_Supplementary_file_2.xlsx]

## Sheet: Content
Sheet “All genes”: data for all genes (basemean in 6 conditions, log fold change, p-adj for DE analysis comparing lower and upper molars in DUHi versus FVB samples) Sheet “DE genes”: DE genes only Sheet “BMP pathway”: DE genes with regulatory information in the regulatory list established by O’Connell et al. 2012 paper (activated or repressed by BMP pathway) and the corresponding indication of we…

## Sheet: all genes
	Low-FVB-youngest	Low-FVB-middle	Low-FVB-oldest	Low-DUHi youngest	Low-DUHi-middle	Low-DUHi-oldest	Up-FVB-youngest	Up-FVB-middle	Up-FVB-oldest	Up-DUHi-youngest	Up-DUHi-middle	Up-DUHi-oldest	baseMean	log2FC	padj
0610007P14Rik	2076.02	2268.14	2031.35	2231.18	2084.03	2152.25	2111.77	2077.19	2085.8	2111.1	2168.05	1945.87	2111.9	0.00526841	0.961637	0.996355
0610009B22Rik	599.92	598.803	563.343	566.648	593.038	601.424	549.785	618.587	619.976	504.008	573.768	494.14	573.62	-0.0920252	0.377388	1.06587
0610009L18Rik	62.2941	62.5759	59.6481	61.3293	76.8308	56.1694	63.5385	65.9006	81.1734	64.1464	70.8569	87.8235	67.6906	0.0859767	0.778737	0.942147
0610009O20Rik	2487.7	2314.35	2411.33	2123.2	2336.14	2415.29	2606.84	2555.19	2543.43	2379.14	2327.04	2614.6	2426.19	-0.0725624	0.371716	1.05158
0610010F05Rik	1285.83	1307.36	1343.19	1245.59	1158.46	1293.27	1299.89	1131.73	1312.89	1213.05	1284.93	1142.76	1251.58	-0.0648256	0.465488	1.04596
0610010K14Rik	1788.93	1599.06	1705.49	1693.03	1787.52	1945.38	1913.22	1931.33	1872.87	1873.99	1614.15	2067.56	1816.04	0.0214659	0.892198	0.985231
0610012G03Rik	1264.84	965.595	1292.38	1173.89	1199.28	1056.26	1216.94	1299.56	1167.01	1189	928.052	1175.57	1160.7	-0.101126	0.475716	1.07261
0610030E20Rik	3075.43	3413.76	3359.07	3469.85	3303.72	3424.96	3218.4	2923.35	3390.46	3435.27	3656.04	3232.54	3325.24	0.0837884	0.246561	0.943577
0610037L13Rik	2699.64	3054.67	2858.69	3197.76	3172.87	2920.81	2774.52	2841.63	2826.95	2994.26	3301.76	2788.13	2952.64	0.108623	0.111988	0.927473
0610040J01Rik	46.7206	63.5386	41.9746	38.8707	55.2221	72.6093	64.421	65.9006	50.5863	81.3285	73.4492	66.6612	60.1069	0.213009	0.542862	0.862736
Rps3a2	50.7833	71.2403	47.4976	19490.6	18091.2	16874.1	179.143	64.1433	35.2928	17760.5	19303.3	14845.4	8901.11	7.88793	2.70603e-113	0.00422179
1110004E09Rik	658.151	633.461	629.619	710.901	701.081	679.513	602.733	641.433	605.859	695.301	648.081	650.741	654.74	0.112997	0.108525	0.924665
1110004F10Rik	6110.24	6915.12	6035.51	6055.19	6063.63	6049.86	5689.34	6117.33	5719.78	5887.72	6367.61	5739.22	6062.55	-0.0167995	0.878748	1.01171
1110008F13Rik	2736.88	2446.24	2628.94	2964.54	2552.22	2571.46	2490.36	2520.92	2429.32	2602.51	2375.43	2155.38	2539.52	-0.00309294	0.985425	1.00215
1110008L16Rik	613.462	737.433	577.703	716.084	612.245	637.043	591.261	610.679	641.152	611.682	667.956	550.22	630.577	0.0109645	0.956035	0.992429
1110008P14Rik	530.854	366.791	410.909	503.591	558.224	439.765	519.78	492.058	495.275	575.027	413.908	484.617	482.567	0.077226	0.712465	0.947878
1110012L19Rik	624.973	602.654	635.142	557.146	573.83	601.424	611.558	655.491	604.683	585.336	669.684	494.14	601.338	-0.100841	0.356456	1.0724
Rps24-ps3	11.5109	22.1422	38.6608	4851.92	4451.38	4259.29	41.4765	15.8161	4.7057	4042.37	4976.4	3769.01	2207.06	7.61789	4.09115e-82	0.00509082
1110032F04Rik	310.794	309.029	299.345	328.241	307.323	228.788	299.161	377.83	308.224	329.896	348.236	262.412	309.106	-0.073451	0.721306	1.05223
1110034G24Rik	216.675	215.646	246.325	206.446	202.881	227.418	226.797	208.246	230.579	237.113	206.522	170.356	216.25	-0.104359	0.504737	1.07502
1110037F02Rik	5666.74	6519.45	6003.47	5801.23	5899.16	6262.21	5445.78	5685.03	5478.62	5718.19	6103.2	6177.27	5896.7	0.047355	0.577501	0.967709
Gm13693	12.188	23.105	18.7781	2917.03	2882.35	2619.41	20.297	13.1801	19.9992	2940.43	3268.92	2912.99	1470.72	7.38606	0	0.00597824
Gm13694	12.188	23.105	18.7781	2917.03	2882.35	2619.41	20.297	13.1801	19.9992	2940.43	3268.92	2912.99	1470.72	7.38606	0	0.00597824
1110059E24Rik	1392.82	1665.48	1377.43	1378.61	1314.53	1333	1364.31	1398.85	1348.18	1185.56	1547.62	1203.08	1375.79	-0.101283	0.398415	1.07273
1110059G10Rik	685.236	915.534	747.811	684.987	715.487	628.824	707.748	730.179	679.974	711.338	859.788	685.658	729.38	-0.057377	0.742271	1.04057
1110065P20Rik	924.933	727.806	901.35	1024.46	1067.23	872.681	993.672	977.965	903.495	1077.89	882.254	1086.68	953.368	0.14648	0.255771	0.903452
1190002N15Rik	5922.01	7383.96	7507.93	7033.86	6581.04	7971.95	6075.87	7971.34	9019.66	6757.14	7612.79	8686.07	7376.97	0.0250677	0.916939	0.982774
1190005I06Rik	79.899	61.6132	85.0538	105.383	98.4394	68.4993	99.7202	91.3822	65.8799	131.729	111.47	111.102	92.5142	0.375536	0.113881	0.770819
1190007I07Rik	113.077	109.749	91.6814	108.838	128.451	94.529	110.31	96.6542	108.231	106.529	125.296	106.87	108.351	0.0916803	0.675738	0.938429
1300017J02Rik	10.1567	14.4406	22.0919	11.2293	8.40337	20.5498	12.3547	16.6948	12.9407	18.3275	13.8257	3.17434	13.6825	-0.235489	0.759741	1.17731
Gm13696	12.188	23.105	18.7781	2917.03	2882.35	2619.41	20.297	13.1801	19.9992	2940.43	3268.92	2912.99	1470.72	7.38606	0	0.00597824
1500011B03Rik	671.693	589.176	545.67	541.598	541.417	523.335	608.028	585.197	565.861	615.118	590.186	526.941	575.352	-0.0973138	0.364387	1.06978
1500011K16Rik	277.615	249.341	250.743	284.188	270.108	265.777	271.804	273.268	264.696	306.986	225.532	233.843	264.492	-0.00541949	0.981159	1.00376
Gm13697	12.188	23.105	18.7781	2917.03	2882.35	2619.41	20.297	13.1801	19.9992	2940.43	3268.92	2912.99	1470.72	7.38606	0	0.00597824
Gm13698	12.188	23.105	18.7781	2917.03	2882.35	2619.41	20.297	13.1801	19.9992	2940.43	3268.92	2912.99	1470.72	7.38606	0	0.00597824
1600002K03Rik	157.09	161.735	180.049	162.393	144.058	167.138	168.554	206.489	209.404	164.948	185.783	172.473	173.343	-0.112238	0.545056	1.0809
Vcp-rs	65.6797	119.376	70.6941	16121	15308.5	15193.1	136.784	72.93	132.936	15182.1	15766.5	14680.3	7737.49	7.27623	0	0.00645113
1600014C10Rik	606.014	687.372	711.359	603.791	662.665	554.844	694.511	735.451	755.265	655.21	610.924	638.043	659.621	-0.166267	0.0679066	1.12215
1600029O15Rik	33.1784	30.8066	38.6608	17.2758	25.2101	28.7697	30.8868	21.9669	38.8221	32.0732	36.2925	20.1042	29.5039	-0.278219	0.507593	1.2127
1700001C19Rik	27.0844	35.6201	9.94136	14.6845	13.2053	17.8098	18.5321	21.9669	24.7049	12.6002	9.50519	14.8136	18.3724	-0.757203	0.092545	1.69021
1700001L19Rik	13.5422	10.5898	8.83676	11.2293	15.6063	6.84993	13.2372	9.66542	8.23498	20.6185	7.77697	11.6393	11.4855	0.177647	0.813809	0.884144
1700001O22Rik	168.6	141.518	174.526	164.984	180.072	209.608	210.913	203.853	214.11	231.385	178.87	213.739	191.015	0.080018	0.743424	0.946046
1700003E16Rik	150.996	108.786	133.656	115.748	115.246	117.819	136.784	130.923	167.052	174.112	101.101	179.88	136.008	-0.0442664	0.909295	1.03116
1700003F12Rik	12.8651	24.0677	15.4643	23.3224	26.4106	20.5498	16.7671	25.4816	23.5285	33.2187	26.7873	29.6272	23.1742	0.450429	0.246805	0.731825
1700007G11Rik	8.80243	17.3287	9.94136	15.5483	10.8043	9.5899	9.70727	8.78675	8.23498	8.0183	24.195	8.46492	11.6185	0.316513	0.662588	0.803008
1700007K13Rik	50.1062	34.6574	30.9287	44.9172	22.8091	31.5097	38.8291	34.2683	43.5278	41.237	22.4668	25.3948	35.0543	-0.305618	0.438293	1.23595
1700008O03Rik	16.2506	21.1795	19.8827	27.6414	22.8091	31.5097	22.9445	24.6029	24.7049	30.9277	29.3797	34.9178	25.5625	0.461783	0.155456	0.726088
Rps2-ps13	19.6362	25.0304	38.6608	20463.2	81.6327	17.8098	87.3655	22.8455	91.7612	20851	50.1183	12.6974	3480.15	7.18421	7.97146e-06	0.006876
Tpm3-rs7	77.8677	88.569	141.388	12062.9	11044.4	11709.3	98.8377	93.1395	89.4084	10932.4	11454.6	10960	5729.39	6.87078	0	0.00854452
1700019D03Rik	126.62	134.779	131.447	166.712	154.862	100.009	172.966	154.647	163.523	145.475	172.822	148.136	147.666	0.016565	0.962346	0.988584
1700020D05Rik	18.282	12.5152	28.7195	29.3689	16.8067	28.7697	34.4167	19.3308	34.1164	30.9277	27.6515	33.8597	26.2304	0.19921	0.7169	0.871027
1700020L24Rik	65.0026	69.3149	69.5895	63.0569	45.6183	52.0595	61.7736	76.4447	79.997	48.1098	46.6618	64.545	61.8478	-0.389068	0.0660943	1.30955
1700021F05Rik	857.899	950.191	809.668	871.567	807.924	857.611	902.776	822.44	755.265	774.339	922.003	821.097	846.065	-0.0124826	0.937838	1.00869
1700023F06Rik	51.4604	39.471	38.6608	39.7345	42.0168	39.7296	75.0107	78.2021	124.701	74.4557	58.7593	71.9518	61.1795	-0.313463	0.54294	1.24269
1700024J04Rik	17.6049	16.366	35.347	30.2327	32.413	21.9198	22.9445	24.6029	22.3521	21.764	20.7386	35.9759	25.1884	0.242311	0.609647	0.84539
1700024P16Rik	20.3133	33.6947	18.7781	25.9138	21.6087	28.7697	20.297	18.4522	12.9407	11.4547	17.2822	19.0461	20.7126	-0.0153454	0.983964	1.01069
1700025G04Rik	4131.73	4584.41	4270.36	4117.7	4444.18	4533.28	4415.93	4154.37	4162.2	4422.67	4897.76	4856.75	4415.94	0.0847093	0.245862	0.942975
1700027J19Rik	456.372	337.91	436.315	435.351	487.395	479.495	429.767	377.83	401.161	512.026	413.044	496.256	438.577	0.207046	0.0832187	0.866309
1700028J19Rik	27.7615	30.8066	32.0333	28.5052	37.2149	26.0297	30.8868	32.511	35.2928	18.3275	25.9232	22.2204	28.9594	-0.253122	0.490914	1.19178
1700028K03Rik	12.188	20.2168	14.3597	11.2293	8.40337	17.8098	14.1197	22.8455	14.1171	11.4547	12.0975	8.46492	13.9422	-0.505133	0.3145	1.41925
1700029I15Rik	54.1688	60.6505	60.7527	60.4655	76.8308	65.7593	47.6539	66.7793	56.4684	61.8555	51.8465	66.6612	60.8244	0.14026	0.613435	0.907356
Gm8822	16.9278	29.8439	18.7781	1861.47	1587.04	1649.46	13.2372	13.1801	16.47	1339.06	1838.82	1151.23	794.626	6.45156	6.76559e-241	0.0114258
1700030C10Rik	23.6989	9.62706	12.1505	25.05	12.0048	16.4398	12.3547	19.3308	10.5878	19.473	9.50519	20.1042	15.8606	0.204923	0.769115	0.867585
1700030J22Rik	142.87	145.369	129.238	105.383	127.251	136.999	153.551	146.739	163.523	144.329	143.442	140.729	139.952	-0.145432	0.412679	1.10606
1700030K09Rik	860.607	874.137	832.865	819.739	859.544	727.463	845.415	861.98	907.024	827.031	918.547	816.865	845.935	-0.057038	0.554716	1.04033
1700037C18Rik	121.203	145.369	149.12	143.39	132.053	143.849	176.496	154.647	175.287	186.712	148.627	168.24	153.749	0.00618248	0.984166	0.995724
1700037H04Rik	1925.7	1621.2	1690.03	1719.81	1786.32	1956.34	1873.5	1751.2	1751.7	1715.92	1557.12	1812.55	1763.45	-0.0112724	0.939218	1.00784
1700040L02Rik	18.282	16.366	13.2551	14.6845	8.40337	19.1798	23.8269	14.9375	17.6464	10.3092	12.0975	13.7555	15.2287	-0.424175	0.379293	1.3418
1700056E22Rik	17.6049	9.62706	24.3011	22.4586	20.4082	9.5899	18.5321	18.4522	21.1757	12.6002	11.2334	25.3948	17.6148	-0.093187	0.902282	1.06672
1700061G19Rik	36.564	49.098	57.4389	28.5052	20.4082	26.0297	23.8269	42.1764	31.7635	36.6551	26.7873	29.6272	34.0734	-0.51258	0.147289	1.4266
1700066B19Rik	11.5109	13.4779	12.1505	33.6879	16.8067	17.8098	7.05983	11.4228	10.5878	16.0366	17.2822	13.7555	15.1324	0.818243	0.0709284	0.567132
1700066M21Rik	1017.7	1192.79	932.278	1111.7	1075.63	823.362	838.355	1053.53	1007.02	839.631	1141.49	1155.46	1015.75	0.0264073	0.915863	0.981862
Gjb4	10.1567	3.85083	8.83676	1019.28	997.6	920.631	21.1795	13.1801	12.9407	1136.31	1055.94	949.129	512.419	6.42888	1.70415e-261	0.0116069
1700088E04Rik	201.779	204.094	235.279	221.995	170.468	223.308	219.737	235.485	298.812	203.894	231.581	174.589	218.418	-0.179738	0.339805	1.13268
1700092M07Rik	10.1567	15.4033	12.1505	13.8207	21.6087	12.3299	11.4722	10.5441	24.7049	12.6002	15.5539	19.0461	14.9493	0.196197	0.759119	0.872848
1700102P08Rik	48.0748	47.1726	40.87	44.9172	34.8139	46.5795	46.7714	43.9337	31.7635	56.1281	55.3029	45.4989	45.1522	0.125109	0.717674	0.916935
Masp2	15.5735	6.73894	20.9873	627.113	552.221	439.765	17.6496	16.6948	24.7049	702.174	644.625	622.172	307.535	5.15714	5.06236e-151	0.0280251
Tmem181b-ps	69.0652	61.6132	54.1252	2180.21	2220.89	1872.77	77.6582	53.5992	67.0563	2230.23	2071.27	2028.41	1082.24	5.03272	0	0.0305492
1700128F08Rik	24.376	19.2541	17.6735	23.3224	28.8115	32.8797	17.6496	14.0588	21.1757	25.2004	22.4668	39.1503	23.8349	0.572801	0.103353	0.67231
1810009A15Rik	1270.26	1082.08	1019.54	1330.24	1176.47	1187.78	1231.06	1131.73	1084.66	1229.09	1121.61	1135.36	1166.66	0.0727682	0.513831	0.950812
1810010H24Rik	26.4073	28.8812	40.87	28.5052	22.8091	21.9198	56.4787	47.4484	34.1164	29.7823	31.972	22.2204	32.6176	-0.56301	0.104671	1.47735
1810011O10Rik	1061.03	1306.39	1251.51	1141.93	1266.51	1157.64	1315.78	1477.05	1467	1168.38	1475.03	1176.62	1272.07	-0.0915064	0.550367	1.06548
Gm10600	17.6049	3.85083	32.0333	613.293	518.608	530.185	21.1795	18.4522	22.3521	546.39	485.629	743.855	296.119	4.91435	2.33886e-103	0.0331614
1810014B01Rik	262.042	293.625	246.325	275.55	300.12	331.537	253.272	241.636	281.166	297.823	320.584	280.4	282.007	0.193591	0.0803644	0.874426
Gm14305	3.38555	34.6574	56.3343	634.887	517.407	741.162	3.52992	29.8749	2.35285	533.79	843.369	579.847	331.717	4.89205	3.53777e-11	0.033678
1810024B03Rik	70.4195	65.464	62.9619	86.3792	48.0192	46.5795	90.0129	68.5366	78.8205	63.0009	69.1286	74.068	68.6159	-0.157909	0.622533	1.11567
1810030O07Rik	2419.99	3022.9	2508.54	2700.22	2539.02	2511.18	2500.95	2596.48	2550.49	2626.57	2835.14	2406.15	2601.47	0.00262056	0.986026	0.998185
Cwc22	2292.02	2843.83	2409.12	71344.1	70533.1	63581	2438.29	2519.16	2369.32	69580.5	79452.1	68778.5	36511.8	4.83111	0	0.0351311
1810037I17Rik	2002.22	1657.78	1690.03	1647.25	1683.07	1679.6	1880.56	1906.72	1621.11	1754.86	1650.45	1625.26	1733.24	-0.101831	0.23929	1.07313
Gm3883	2.03133	6.73894	16.5689	274.686	134.454	152.068	17.6496	13.1801	10.5878	147.766	222.94	261.354	105.002	4.18814	1.66084e-31	0.0548587
1810043G02Rik	1079.99	1020.47	1107.91	1039.14	1090.04	1002.83	1171.05	1145.79	1242.31	1166.09	1101.74	1208.37	1114.64	-0.03295	0.791295	1.0231
1810049J17Rik	310.794	152.108	352.366	374.022	373.35	328.797	328.282	407.705	363.516	334.478	201.337	359.759	323.876	0.0417978	0.931866	0.971444
1810055G02Rik	1908.77	1574.99	1780.61	2036.82	2222.09	1775.5	1760.55	1823.25	1723.46	2083.61	1708.34	2094.01	1874.33	0.172529	0.0746746	0.887286
Il11ra2	16.9278	35.6201	15.4643	364.52	343.338	409.626	56.4787	24.6029	0	395.188	328.361	490.965	206.758	3.96176	8.69781e-11	0.0641787
Il1f9	125.265	160.772	144.702	2293.37	2306.12	2086.49	140.314	144.103	125.878	2034.36	2241.5	2094.01	1158.07	3.95995	0	0.0642594
2010109I03Rik	65.6797	111.674	69.5895	63.0569	81.6327	65.7593	83.8355	52.7205	69.4091	72.1647	67.4004	75.1262	73.1707	-0.09162	0.808007	1.06557
2010111I01Rik	2466.71	2731.2	2511.85	2384.07	2241.3	2434.46	2385.34	2603.51	2281.09	2298.96	2510.23	2006.19	2404.58	-0.110522	0.220029	1.07962
Dynlt1b	289.803	2.88812	201.036	4255.04	4052.82	3979.81	393.586	321.595	459.983	4655.2	4127.84	4168.97	2242.38	3.91879	9.21751e-08	0.0661191
2010315B03Rik	255.271	313.842	287.195	232.36	253.301	267.147	270.039	269.753	323.517	254.295	308.487	265.587	275.066	-0.11556	0.447848	1.0834
Gm7340	50.1062	7.70165	62.9619	558.874	600.24	590.464	59.1261	12.3014	64.7034	589.918	703.384	684.6	332.032	3.86192	1.23618e-16	0.0687774
2210013O21Rik	972.33	1067.64	972.044	985.587	933.974	930.22	991.907	954.241	1052.9	911.795	1017.06	1027.43	984.761	-0.0466361	0.604145	1.03285
2210016F16Rik	805.084	824.077	809.668	934.623	863.146	752.122	708.631	852.315	796.44	878.577	763.007	742.797	810.874	0.0419611	0.767772	0.971334
2210016L21Rik	1742.2	1525.89	1687.82	1723.27	1690.28	1665.9	1786.14	1680.03	1799.93	1754.86	1697.97	1774.46	1710.73	0.0122773	0.907423	0.991526
2210408I21Rik	291.157	346.574	340.215	348.972	344.538	404.146	321.222	357.621	352.928	365.405	358.605	386.212	351.466	0.137299	0.214878	0.90922
Zfp990	92.087	42.3591	43.0792	889.706	859.544	801.442	73.2458	68.5366	64.7034	880.868	1055.94	753.378	468.741	3.75468	1.55078e-118	0.0740849
2300002M23Rik	14.2193	6.73894	15.4643	9.50172	9.60385	19.1798	15.8846	23.7242	16.47	10.3092	9.50519	9.52303	13.3437	-0.476421	0.412574	1.39129
2300009A05Rik	272.198	210.833	261.789	251.364	265.306	250.707	242.682	193.308	274.107	255.44	193.56	238.076	242.448	-0.00261024	0.992943	1.00181
Gm14295	9.47954	7.70165	57.4389	240.134	249.7	357.566	9.70727	5.27205	29.4106	208.476	241.95	244.425	138.438	3.72114	1.22795e-15	0.0758271
2310011J03Rik	1367.09	1145.62	1322.2	1318.15	1302.52	1219.29	1384.61	1326.8	1310.54	1414.66	1157.9	1337.46	1300.57	-0.0205985	0.881376	1.01438
2310022A10Rik	1646.73	1547.07	1733.11	1724.99	1834.33	1745.36	1729.66	1624.67	1641.11	1711.33	1624.52	1757.53	1693.37	0.066656	0.310662	0.954849
2310022B05Rik	5469.7	4587.3	5168.4	5372.79	5326.53	5733.39	5213.69	5381	4865.7	5556.68	4900.36	6042.89	5301.54	0.10133	0.242104	0.932173
Col6a4	15.5735	16.366	19.8827	39.7345	52.8212	53.4295	7.94231	14.9375	12.9407	357.387	235.037	97.3466	76.9499	3.2558	3.39642e-09	0.10469
Rps26-ps1	1581.05	792.307	1155.41	13444.9	12061.2	12956	2001.46	1609.73	1261.13	12077.9	12800.9	12189.5	6994.29	3.16781	2.70338e-85	0.111274
2310034G01Rik	22.3446	9.62706	6.62757	9.50172	10.8043	21.9198	15.0021	12.3014	22.3521	17.1821	17.2822	10.5811	14.6272	-0.0371147	0.9695	1.02606
2310035C23Rik	2000.86	2029.39	2087.68	1846.79	1780.31	2104.3	1999.7	1808.31	2019.92	1888.88	1869.93	2010.42	1953.87	-0.0552691	0.520071	1.03905
2310036O22Rik	4040.99	3515.8	3532.49	3985.54	4014.41	3614.02	4096.47	4099.9	3950.44	3791.51	3164.36	3706.58	3792.71	-0.0613268	0.597261	1.04342
2310039H08Rik	376.473	321.544	363.412	362.793	366.147	317.837	360.052	376.073	395.279	429.552	285.156	407.374	363.474	-0.016632	0.945798	1.0116
2310057M21Rik	886.337	1052.24	955.475	1062.46	947.179	913.781	911.601	878.675	891.731	981.669	1010.14	935.374	952.222	0.0721922	0.466051	0.951192
Cort	18.9591	17.3287	17.6735	138.207	181.273	187.688	19.4145	17.5735	11.7643	146.62	125.296	136.497	84.8578	3.13189	2.24688e-53	0.114079
Trim12a	41.3037	27.9185	40.87	245.317	225.69	245.227	31.7693	27.2389	31.7635	296.677	299.845	350.236	155.321	3.04581	3.03809e-70	0.121093
2410004B18Rik	858.576	953.079	825.132	849.972	866.747	797.332	848.945	900.642	871.732	856.813	829.544	779.831	853.195	-0.0779854	0.322904	1.05554
2410004P03Rik	81.2532	89.5317	113.773	76.0137	78.0313	79.4592	93.5428	98.4116	81.1734	59.5645	85.5467	88.8817	85.4319	-0.248183	0.238976	1.18771
2410015M20Rik	1507.25	1370.89	1401.73	1604.93	1653.06	1565.89	1685.54	1646.64	1616.41	1742.26	1493.18	1641.14	1577.41	0.0712929	0.496905	0.951785
2410089E03Rik	3021.27	2774.52	3202.22	2807.33	2857.14	3733.21	3208.69	2935.65	3488.1	3109.96	2792.8	3615.58	3128.87	0.0216353	0.91331	0.985115
Gm13305	223.446	221.422	241.906	1826.06	2045.62	1490.54	249.742	213.518	229.403	2064.14	1923.5	1885.56	1051.24	3.02764	2.63662e-258	0.122628
2410141K09Rik	18.282	18.2914	24.3011	34.5517	34.8139	36.9896	31.7693	17.5735	43.5278	29.7823	38.8849	24.3366	29.4253	0.394466	0.352748	0.760771
2510002D24Rik	739.404	806.748	763.275	772.23	741.897	754.862	823.353	838.256	864.673	813.285	694.743	786.179	783.242	-0.0829511	0.359708	1.05918
2510009E07Rik	1609.49	1890.76	1933.04	2010.91	2129.65	1805.64	1984.7	2123.76	2296.38	2272.62	2411.73	2363.83	2069.37	0.135747	0.325906	0.910198
2510039O18Rik	3158.72	2616.64	3095.08	2723.54	2979.59	2686.54	3335.77	3214.19	2896.36	2922.1	2292.48	3043.14	2913.68	-0.138556	0.217867	1.1008
Dennd1c	33.1784	28.8812	47.4976	247.908	260.504	365.786	31.7693	35.147	49.4099	327.605	311.943	294.156	169.482	3.01827	1.05998e-75	0.123427
Gm10031	90.0557	77.0165	82.8446	824.058	647.059	891.861	84.718	79.9594	149.406	663.228	660.179	700.472	412.571	2.96809	1.53588e-80	0.127795
2610005L07Rik	3769.47	3210.63	4297.98	3766.14	3669.87	4237.37	4074.41	3213.31	4758.64	3845.35	3626.66	4126.65	3883.04	-0.00304079	0.989658	1.00211
2610008E11Rik	2406.45	3146.12	2711.78	2726.99	2613.45	2733.12	2695.09	2729.16	2983.42	2682.69	3300.03	2510.91	2769.93	-0.00809716	0.967422	1.00563
4930562C15Rik	114.432	105.898	136.97	968.311	971.189	839.801	132.372	107.198	139.995	1043.52	801.892	1044.36	533.829	2.95058	4.72451e-171	0.129356
2610021A01Rik	905.974	954.042	942.22	913.029	804.322	878.161	926.603	933.153	947.023	949.596	1046.43	841.201	920.147	-0.043143	0.715159	1.03036
2610042L04Rik	135.422	95.3079	71.7987	64.7844	73.2293	78.0892	110.31	92.2609	107.055	90.4923	68.2645	96.2885	90.2752	-0.388987	0.100507	1.30947
2610044O15Rik8	1862.73	2281.61	2114.19	1818.28	1728.69	1785.09	1844.38	1899.69	1982.28	1688.43	2133.48	1697.22	1903.01	-0.141947	0.172279	1.10339
Zfp973	26.4073	30.8066	17.6735	199.536	162.065	295.917	25.5919	33.3896	42.3513	200.458	205.658	281.459	126.776	2.93711	7.63509e-42	0.13057
Lct	10.8338	10.5898	14.3597	73.4224	82.8332	80.8292	12.3547	14.0588	8.23498	88.2013	107.149	95.2303	49.8415	2.90445	6.15171e-35	0.133559
2610507B11Rik	14250.5	14836.3	13799.7	14907.3	15162.1	14039.6	13837.3	14757.3	14430	14760.5	14745.1	13503.7	14419.1	0.0202058	0.776417	0.986092
Zfp985	20.9904	28.8812	19.8827	150.3	142.857	147.958	19.4145	18.4522	19.9992	166.093	224.668	118.509	89.8339	2.90059	3.01721e-41	0.133917
2610528A11Rik	20.3133	34.6574	40.87	12.0931	26.4106	27.3997	9.70727	11.4228	5.88213	9.16377	4.32054	10.5811	17.7351	-0.465664	0.627274	1.38095
2610528J11Rik	49.4291	36.5828	35.347	31.9603	26.4106	27.3997	43.2415	40.419	32.9399	41.237	31.972	34.9178	35.9881	-0.305254	0.323635	1.23564
Fam205a4	31.1471	9.62706	20.9873	133.888	151.261	119.189	25.5919	16.6948	34.1164	155.784	201.337	205.274	92.0748	2.80737	8.2337e-27	0.142856
Gm14654	94.1183	90.4944	91.6814	682.396	637.455	691.843	88.2479	81.7168	116.466	639.173	540.932	693.065	370.632	2.79354	2.2487e-158	0.144232
2700062C07Rik	630.39	737.433	692.581	716.948	701.081	702.803	663.624	701.183	702.326	701.029	713.753	675.077	694.852	0.0322061	0.748163	0.977924
2700081O15Rik	13297.8	12145.5	13111.5	13901.9	14862	12784.7	13854.9	13756.5	14335.9	15206.1	14279.4	14785	13860.1	0.0923782	0.222645	0.937975
2700097O09Rik	1119.26	1366.08	1253.72	1198.94	1102.04	1031.6	1120.75	1061.44	1142.31	1041.23	1271.1	1048.59	1146.42	-0.0752022	0.571539	1.05351
Ahcy	916.807	792.307	836.178	6141.56	5795.92	5874.5	961.902	869.009	835.262	5759.43	5417.96	5514.89	3309.64	2.72466	0	0.151285
2810004N23Rik	2843.19	3125.91	2889.62	2968.85	2851.14	2896.15	2947.48	2871.51	2834.01	3012.59	2961.3	2555.35	2896.42	-0.0219073	0.818663	1.0153
Gm5859	18.9591	9.62706	8.83676	68.2396	115.246	101.379	15.8846	8.78675	29.4106	64.1464	76.9056	172.473	57.4912	2.71414	2.57195e-13	0.152392
Zfp534	23.0217	14.4406	11.046	111.429	93.6375	104.119	21.1795	9.66542	11.7643	79.0375	123.567	98.4047	58.4427	2.71147	4.17493e-28	0.152675
4930447C04Rik	70.4195	92.4198	87.263	529.505	510.204	523.335	72.3633	85.2315	97.6434	522.335	544.388	559.743	307.904	2.67583	2.07621e-180	0.156493
2810039B14Rik	296.574	366.791	378.876	324.786	318.127	337.017	344.167	325.988	379.986	351.66	389.713	360.817	347.875	8.8431e-06	0.999955	0.999994
2810403A07Rik	6275.46	7274.21	6371.3	6913.79	6851.14	6333.44	6559.47	6170.93	6097.42	6987.38	7503.05	6018.56	6613.01	0.0678309	0.501632	0.954071
2810408A11Rik	617.525	607.468	664.966	547.644	563.026	690.473	661.86	648.462	698.797	594.5	598.827	632.753	627.192	-0.10547	0.293413	1.07585
2810428I15Rik	1556.68	1336.24	1502.25	1581.6	1625.45	1561.78	1633.47	1628.18	1516.41	1512.02	1309.99	1610.45	1531.21	0.00308285	0.985042	0.997865
2810459M11Rik	26.4073	11.5525	26.5103	16.4121	14.4058	8.21992	25.5919	10.5441	15.2935	12.6002	4.32054	11.6393	15.2914	-0.783424	0.165854	1.72121
2810474O19Rik	2494.47	2658.03	2825.55	2637.16	2232.89	2782.44	2430.35	2377.69	2743.43	2483.38	2644.17	2420.97	2560.88	-0.0300193	0.816005	1.02103
2900011O08Rik	315.533	137.667	162.375	169.303	248.5	153.438	203.853	157.283	178.817	146.62	165.045	167.182	183.801	-0.142995	0.702188	1.1042
2900026A02Rik	5758.15	5338.21	5654.42	4282.68	4184.88	6849.93	5938.2	6602.36	5739.78	5166.08	5207.12	5517.01	5519.9	-0.167073	0.287031	1.12278
Smarce1-ps1	43.3351	52.9489	28.7195	170.167	184.874	131.519	38.8291	0	0	151.202	187.511	219.03	100.678	2.66994	0.0170097	0.157133
3110001I22Rik	173.34	185.802	180.049	153.755	164.466	164.398	167.671	160.797	210.58	174.112	174.55	125.916	169.62	-0.167812	0.309997	1.12335
3110002H16Rik	1364.38	1404.59	1424.93	1477.95	1542.62	1305.6	1351.96	1322.41	1439.95	1422.68	1447.38	1303.6	1400.67	0.0349017	0.714765	0.976098
3110009E18Rik	132.714	124.189	119.296	145.981	159.664	134.259	141.197	144.981	141.171	148.911	132.209	144.962	139.128	0.105103	0.542074	0.929739
3110021N24Rik	24.376	10.5898	25.4057	16.4121	18.0072	5.47994	21.1795	11.4228	24.7049	9.16377	19.8745	16.9298	16.9622	-0.430017	0.476383	1.34725
3110035E14Rik	32.5013	8.66436	4.41838	9.50172	33.6135	16.4398	24.7094	12.3014	10.5878	20.6185	12.9616	11.6393	16.4964	0.136083	0.901617	0.909986
3110040N11Rik	440.799	337.91	367.83	419.803	423.77	426.066	403.293	393.646	437.63	481.098	423.413	414.781	414.17	0.118421	0.331284	0.921195
3110043O21Rik	2005.6	2225.78	1944.09	1859.75	1819.93	1852.22	1627.29	1673	1479.94	1485.68	1724.76	1289.84	1748.99	-0.127406	0.498772	1.09233
3110053B16Rik	434.705	388.933	491.545	423.258	462.185	432.916	407.705	398.04	455.277	498.28	495.134	420.072	442.337	0.0873284	0.511017	0.941264
3110062M04Rik	503.093	532.377	569.971	529.505	561.825	489.085	522.428	535.992	601.154	522.335	516.737	536.464	535.08	-0.0439231	0.700788	1.03091
Zfp979	58.2315	107.823	81.74	464.72	420.168	452.095	65.3035	70.294	70.5856	489.116	541.796	493.082	276.246	2.66623	6.89597e-86	0.157537
3110070M22Rik	66.3568	52.9489	53.0206	81.1965	62.425	39.7296	75.8932	108.077	75.2913	65.2919	64.8081	63.4869	67.3771	-0.188697	0.620527	1.13973
3110082I17Rik	1031.24	1088.82	968.73	1181.67	1196.88	1004.2	1119.87	1050.9	931.729	1189	1035.2	1093.03	1074.27	0.112966	0.238963	0.924685
3300002I08Rik	58.2315	36.5828	50.8114	64.7844	34.8139	65.7593	43.2415	38.6617	64.7034	64.1464	56.167	59.2544	53.0965	0.243541	0.475716	0.84467
3632451O06Rik	633.098	634.424	537.938	741.134	428.572	508.265	615.971	544.778	623.506	773.193	583.273	656.031	606.682	0.0412835	0.886003	0.97179
3830406C13Rik	651.38	882.802	678.221	723.858	671.069	731.572	683.039	707.333	755.265	655.21	923.732	642.276	725.48	-0.00119564	0.996807	1.00083
3830408C21Rik	44.6893	66.4267	57.4389	52.6913	56.4226	34.2496	52.0663	68.5366	74.1148	59.5645	67.4004	58.1963	57.6498	-0.125932	0.728305	1.09121
Rtn4rl2	17.6049	10.5898	12.1505	101.928	91.2365	58.9094	30.0043	25.4816	28.2342	221.076	111.47	175.647	73.6943	2.61673	2.47267e-12	0.163037
Gm10073	18.282	24.0677	29.8241	117.476	204.082	130.149	24.7094	7.0294	19.9992	105.383	66.5363	96.2885	70.3188	2.54447	6.42593e-14	0.171411
4833423E24Rik	83.2846	92.4198	103.832	114.021	132.053	183.578	55.5962	86.9888	104.702	79.0375	128.752	116.393	106.721	0.517732	0.0515201	0.698469
4833439L19Rik	5089.84	5214.02	4894.46	5574.05	5653.06	5222.39	4992.19	5125.31	4696.29	5643.74	5500.91	4808.07	5201.19	0.110343	0.081838	0.926368
4921507P07Rik	16.9278	25.9931	26.5103	31.9603	33.6135	35.6196	38.8291	26.3602	35.2928	43.5279	48.3901	29.6272	32.721	0.406593	0.272035	0.754403
4921524J17Rik	722.477	931.9	727.928	706.582	721.489	693.213	698.924	753.903	759.971	703.32	823.495	682.484	743.807	-0.083648	0.531635	1.05969
4921536K21Rik	46.0435	40.4337	47.4976	33.6879	28.8115	19.1798	45.0064	41.2977	39.9985	37.8006	33.7002	31.7434	37.1001	-0.479331	0.0656869	1.3941
4930402H24Rik	2979.29	3057.56	3175.71	3282.41	3237.7	3003.01	2933.36	3119.3	3262.23	3104.23	3232.63	3375.39	3146.9	0.0558597	0.374427	0.962021
4930404N11Rik	83.9617	41.3964	45.2884	56.1465	76.8308	45.2095	91.7779	121.257	82.3498	83.6194	65.6722	68.7775	71.8573	-0.237418	0.605051	1.17888
4930415F15Rik	14.2193	6.73894	12.1505	12.0931	9.60385	9.5899	21.1795	14.0588	4.7057	14.8911	6.04876	14.8136	11.6744	-0.146948	0.870767	1.10722
4930415O20Rik	12.188	21.1795	14.3597	14.6845	19.2077	5.47994	15.0021	21.9669	12.9407	5.72736	19.8745	15.8717	14.8736	-0.250213	0.720053	1.18938
Gm4724	100.212	146.331	71.7987	693.625	672.269	556.214	50.3013	138.831	142.348	620.846	713.753	486.733	366.105	2.52852	6.27988e-29	0.173317
4930430F08Rik	411.006	489.055	448.466	437.079	478.992	417.846	475.656	439.337	499.981	384.878	454.521	485.675	451.874	-0.0516421	0.721744	1.03644
4930431P19Rik	49.4291	63.5386	55.2298	60.4655	44.4178	63.0194	60.0086	52.7205	62.3506	68.7283	71.721	42.3246	57.8295	0.0404468	0.92309	0.972354
4930432K21Rik	88.7014	64.5013	61.8573	79.4689	90.0361	97.269	86.483	95.7756	115.29	75.6011	90.7313	118.509	88.6853	0.104789	0.759801	0.929941
4930444P10Rik	37.2411	46.2099	46.393	51.8275	42.0168	31.5097	47.6539	27.2389	28.2342	51.5462	57.8952	29.6272	41.4495	0.193102	0.655306	0.874723
Tlr1	35.8868	51.9861	37.5562	176.214	205.282	158.918	39.7116	33.3896	42.3513	264.604	279.107	272.994	133.167	2.50135	3.10364e-37	0.176611
Sim2	101.567	58.7251	58.5435	33.6879	196.879	210.978	144.727	104.562	115.29	1258.87	1204.57	265.587	312.832	2.44203	0.00384242	0.184024
4930452B06Rik	343.972	349.462	365.621	324.786	295.318	413.736	352.992	382.224	307.047	422.679	370.702	339.655	355.683	0.0410468	0.841346	0.971949
4930453N24Rik	1818.04	2213.26	1831.42	1824.33	1710.69	1671.38	1597.29	1690.57	1729.35	1743.41	1966.71	1572.36	1780.73	-0.0520153	0.730342	1.03671
Gm5421	42.6579	37.5455	19.8827	114.884	111.645	112.339	10.5898	16.6948	7.05856	135.166	125.296	137.555	72.6095	2.43294	7.3773e-12	0.185188
4930507D05Rik	23.0217	28.8812	24.3011	22.4586	33.6135	13.6999	32.6517	32.511	27.0578	25.2004	17.2822	24.3366	25.418	-0.303515	0.462547	1.23415
4930516K23Rik	18.282	24.0677	20.9873	41.462	28.8115	24.6597	29.1218	10.5441	28.2342	26.3458	39.749	45.4989	28.147	0.676762	0.0756892	0.625568
4930518I15Rik	98.8581	117.45	117.087	107.974	102.041	82.1992	106.78	115.106	143.524	91.6377	127.024	102.637	109.36	-0.169971	0.443322	1.12504
4930519G04Rik	8.12532	18.2914	14.3597	25.9138	15.6063	13.6999	16.7671	8.78675	14.1171	12.6002	18.1463	16.9298	15.2786	0.389454	0.477006	0.763418
4930522L14Rik	421.84	559.332	461.721	348.972	358.944	384.966	373.289	420.885	438.807	363.115	501.183	346.004	414.921	-0.213779	0.208975	1.15972
Gm2420	80.5761	68.3522	61.8573	393.026	386.555	410.996	93.5428	84.3528	109.408	460.48	444.152	464.512	254.817	2.36465	9.31977e-82	0.194164
4930524J08Rik	94.7954	72.203	104.937	76.0137	87.6351	101.379	101.485	86.1101	83.5262	100.802	62.2158	79.3586	87.5383	-0.110667	0.705401	1.07973
4930526A20Rik	97.5039	56.7997	90.5768	62.1931	92.437	93.159	86.483	87.8675	70.5856	93.9287	78.6338	118.509	85.7231	0.127071	0.709894	0.915689
4930529C04Rik	23.0217	26.9558	15.4643	27.6414	27.6111	30.1397	20.297	30.7536	21.1757	13.7457	37.1566	22.2204	24.6819	0.203337	0.691014	0.868539
4930539E08Rik	117.14	135.742	122.61	127.841	104.442	128.779	127.96	113.349	123.525	113.402	135.665	126.974	123.119	0.000612936	0.998772	0.999575
4930548H24Rik	23.0217	36.5828	27.6149	21.5948	32.413	10.9599	30.0043	21.0882	22.3521	33.2187	22.4668	27.511	25.7357	-0.11161	0.849267	1.08043
Mrap2	12.188	18.2914	12.1505	74.2862	56.4226	65.7593	16.7671	17.5735	21.1757	107.674	86.4108	69.8356	46.5446	2.24673	8.81004e-19	0.2107
4930578C19Rik	69.7424	81.83	103.832	73.4224	63.6255	72.6093	55.5962	58.8712	57.6449	53.8372	82.9544	87.8235	71.8157	0.0305416	0.948056	0.979053
4930579F01Rik	24.376	25.0304	18.7781	33.6879	32.413	23.2898	23.8269	7.90807	10.5878	25.2004	24.195	14.8136	22.0089	0.465874	0.372493	0.724032
4930579G24Rik	1136.87	1342.98	1233.83	1116.88	1116.45	1134.35	1119.87	1165.12	1071.72	1052.69	1233.08	1261.27	1165.43	-0.0312619	0.818872	1.02191
4930590J08Rik	50.7833	73.1657	66.2757	50.9638	39.6159	46.5795	51.1838	48.3271	44.7042	35.5096	37.1566	32.8016	48.0889	-0.459589	0.0844327	1.37515
4931406C07Rik	1120.62	1440.21	1347.61	1344.92	1330.13	1191.89	1334.31	1365.46	1467	1363.11	1543.3	1315.24	1346.98	0.00513405	0.978532	0.996448
4931406P16Rik	2747.04	2987.28	2917.24	2777.09	2890.76	2863.27	2664.21	2954.1	2944.59	2798.39	2694.29	3102.39	2861.72	-0.00724959	0.947503	1.00504
Lrrc55	187.56	206.982	237.488	919.939	854.742	764.452	167.671	233.728	263.519	1312.71	1321.22	913.153	615.264	2.23451	7.76825e-44	0.212493
4931422A03Rik	17.6049	3.85083	12.1505	18.1396	12.0048	17.8098	18.5321	12.3014	17.6464	22.9094	16.4181	31.7434	16.7593	0.531653	0.35577	0.691762
Gm14410	73.1279	52.9489	46.393	249.636	285.714	324.687	170.319	70.294	72.9384	378.006	558.214	464.512	228.899	2.21525	1.06586e-12	0.215349
Cd8a	7.44821	10.5898	12.1505	43.1896	39.6159	61.6494	15.8846	7.0294	7.05856	49.2553	44.9336	40.2084	28.2511	2.21209	1.88799e-13	0.215822
4932411N23Rik	12.8651	23.105	9.94136	10.3655	12.0048	2.73997	37.0641	19.3308	9.41141	9.16377	25.0591	9.52303	15.0478	-0.679214	0.366414	1.60127
4932414N04Rik	13.5422	10.5898	9.94136	22.4586	12.0048	15.0698	10.5898	7.90807	14.1171	19.473	17.2822	20.1042	14.4234	0.685896	0.108622	0.62162
4932438A13Rik	3671.29	3177.89	4072.64	3124.34	2841.54	3708.55	3829.08	3063.94	3943.38	3194.72	2905.13	3468.5	3416.75	-0.177369	0.143837	1.13082
4932443I19Rik	21.6675	20.2168	20.9873	19.8672	18.0072	31.5097	28.2393	16.6948	19.9992	29.7823	33.7002	20.1042	23.398	0.254641	0.576202	0.838196
4933402D24Rik	12.8651	8.66436	19.8827	10.3655	4.80192	13.6999	11.4722	7.90807	18.8228	14.8911	6.91286	11.6393	11.8272	-0.348003	0.616021	1.2728
4933407L21Rik	16.2506	21.1795	9.94136	17.2758	7.20289	19.1798	11.4722	7.90807	9.41141	14.8911	15.5539	14.8136	13.7567	0.213701	0.755732	0.862322
Gm14296	300.637	367.754	349.052	1694.76	1388.96	1490.54	343.284	398.04	419.984	1785.79	1826.72	1551.2	993.06	2.16454	1.10418e-112	0.223053
4933411K16Rik	23.0217	15.4033	12.1505	17.2758	16.8067	23.2898	20.297	12.3014	24.7049	18.3275	19.8745	22.2204	18.8062	0.116916	0.845541	0.922157
4933412A08Rik	23.6989	21.1795	26.5103	18.1396	30.012	30.1397	39.7116	24.6029	27.0578	22.9094	20.7386	34.9178	26.6348	-0.067151	0.910661	1.04765
4933413G19Rik	59.5857	69.3149	61.8573	64.7844	60.024	69.8693	52.9488	77.3234	52.9392	41.237	57.8952	70.8937	61.5561	-0.0391577	0.924283	1.02751
4933415A04Rik	79.2219	65.464	62.9619	70.831	66.0264	69.8693	76.7757	81.7168	75.2913	61.8555	60.4876	65.6031	69.6754	-0.169247	0.455343	1.12447
4933427D14Rik	2459.26	2440.46	2433.42	2265.73	2351.74	2383.78	2416.23	2335.52	2366.97	2413.51	2505.91	2246.38	2384.91	-0.0290248	0.659679	1.02032
4933427G23Rik	14.8964	15.4033	9.94136	14.6845	13.2053	15.0698	14.1197	11.4228	14.1171	18.3275	10.3693	9.52303	13.4233	0.00580612	0.99473	0.995984
4933427I04Rik	218.03	229.124	228.651	205.583	188.476	234.268	175.613	208.246	251.755	211.912	218.619	202.1	214.365	-0.0534464	0.786665	1.03774
4933428G20Rik	29.7929	20.2168	26.5103	17.2758	25.2101	16.4398	23.8269	22.8455	35.2928	24.0549	25.9232	20.1042	23.9578	-0.288578	0.482014	1.22144
4933430I17Rik	29.7929	27.9185	34.2424	19.0034	26.4106	31.5097	39.7116	36.0257	30.5871	32.0732	33.7002	23.2785	30.3545	-0.264007	0.471853	1.20081
4933434E20Rik	2285.92	2400.03	2335.11	2318.42	2248.5	2198.83	2274.15	2428.66	2590.49	2129.43	2492.95	2100.36	2316.9	-0.083978	0.282449	1.05994
5031439G07Rik	5309.9	4777.91	5156.25	5400.43	5331.34	5029.22	5132.5	4914.43	4663.35	5129.42	4609.15	4821.83	5022.98	0.0170523	0.875703	0.98825
5330417C22Rik	36.564	9.62706	8.83676	10.3655	14.4058	9.5899	31.7693	18.4522	19.9992	12.6002	9.50519	15.8717	16.4656	-0.812738	0.155953	1.75654
5430403G16Rik	379.859	455.36	415.328	364.52	375.751	437.026	424.473	381.345	474.1	350.514	493.406	355.527	408.934	-0.0874055	0.629784	1.06246
5430416O09Rik	15.5735	17.3287	24.3011	19.8672	16.8067	10.9599	16.7671	15.8161	14.1171	13.7457	6.91286	11.6393	15.3196	-0.371312	0.489	1.29353
5730409E04Rik	784.771	812.524	896.931	1005.45	1058.82	812.402	939.841	912.064	1191.72	1027.49	1000.64	1006.27	954.077	0.0966148	0.574684	0.935225
5730455P16Rik	1932.47	2517.48	2251.16	2195.76	2273.71	2276.92	2006.76	2127.27	2223.45	2129.43	2581.09	2204.05	2226.63	0.0661837	0.58441	0.955161
Hmga1	3776.92	2719.65	3234.25	14582.5	13584.6	13905.4	3437.26	2873.27	2602.25	15071	12484.6	11928.1	8349.99	2.12854	5.56385e-110	0.22869
5730507C01Rik	591.117	630.573	667.175	620.203	671.069	683.623	624.795	543.021	698.797	587.627	698.199	649.683	638.824	0.0610953	0.634867	0.958536
5730508B09Rik	281.678	305.178	305.973	257.41	247.299	184.948	499.483	564.109	458.806	489.116	539.203	416.897	379.175	-0.176426	0.712465	1.13008
5730522E02Rik	47.3977	36.5828	56.3343	46.6448	37.2149	56.1694	38.8291	43.9337	39.9985	68.7283	44.9336	44.4408	46.7673	0.175149	0.613758	0.885676
5730559C18Rik	1934.5	1522.04	1696.66	1988.45	2096.04	2076.9	1997.93	1825.01	1621.11	2116.83	1714.39	2045.34	1886.27	0.1822	0.0777135	0.881358
5830417I10Rik	3030.07	2599.31	3074.09	3036.23	2941.18	3266.05	3106.33	2914.56	2924.59	3323.01	3070.18	3391.26	3056.4	0.10809	0.156978	0.927816
5830473C10Rik	142.87	119.376	114.878	40.5982	96.0385	106.859	151.786	149.375	115.29	85.9104	122.703	100.521	112.184	-0.528095	0.0626632	1.44202
Aldh1a1	9.47954	12.5152	11.046	6.04655	7.20289	5.47994	33.5342	20.2095	3.52928	159.221	146.034	60.3125	39.5509	2.08687	0.0349753	0.23539
6030419C18Rik	1809.24	1750.2	1775.08	2262.27	2157.26	1778.24	3018.96	2214.26	2337.56	2758.3	2393.58	2637.88	2241.07	0.116439	0.636964	0.922462
6030445D17Rik	10.1567	19.2541	14.3597	10.3655	20.4082	16.4398	15.8846	14.0588	22.3521	16.0366	19.0104	14.8136	16.095	0.0278532	0.971387	0.980879
Fam205a2	31.1471	42.3591	60.7527	195.217	174.07	138.369	42.359	49.2058	58.8213	207.33	201.337	277.226	123.183	2.08614	1.4809e-23	0.23551
6330408A02Rik	1090.15	1157.17	1152.09	1171.3	1132.05	1137.09	1170.17	1069.35	1131.72	1123.71	1287.52	1142.76	1147.09	0.0499454	0.543775	0.965973
6330409D20Rik	20.3133	15.4033	8.83676	19.0034	13.2053	9.5899	14.1197	10.5441	10.5878	6.87283	8.64108	6.34869	11.9555	-0.331635	0.635604	1.25844
Gm14434	80.5761	108.786	45.2884	557.146	608.644	372.636	192.38	79.9594	147.053	391.751	718.938	80.4167	281.965	2.06166	0.000196924	0.23954
Zfp965	25.7302	34.6574	16.5689	121.795	99.6399	124.669	37.0641	26.3602	29.4106	109.965	126.16	128.032	73.3377	2.06148	6.06561e-29	0.239569
6430548M08Rik	485.488	460.174	511.428	532.096	577.431	482.235	454.477	528.962	521.157	532.644	576.36	521.651	515.342	0.125451	0.193977	0.916717
6430550D23Rik	62.9713	52.9489	67.3803	59.6017	78.0313	78.0892	80.3056	68.5366	62.3506	90.4923	119.247	101.579	76.7945	0.419709	0.0949876	0.747576
Slfn10-ps	11.5109	13.4779	12.1505	63.9206	56.4226	58.9094	16.7671	15.8161	22.3521	69.8738	57.8952	60.3125	38.2841	2.01949	3.27893e-18	0.246645
6430573F11Rik	215.321	194.467	219.814	168.44	159.664	178.098	169.436	142.345	158.818	152.348	159.86	123.799	170.201	-0.226136	0.256579	1.1697
6720489N17Rik	588.409	762.463	572.18	693.625	662.665	621.974	588.614	561.473	665.857	604.809	827.816	576.673	643.88	0.0955332	0.597503	0.935926
6820408C15Rik	27.0844	23.105	15.4643	23.3224	24.0096	28.7697	22.9445	31.6323	37.6456	36.6551	26.7873	37.034	27.8712	0.158409	0.744678	0.896013
6820431F20Rik	26521.7	33016	31488.7	29682.5	28369.8	29697.2	28062	26898.9	31638.8	28188.9	33503.2	27814.7	29573.5	-0.00288684	0.986026	1.002
8030462N17Rik	812.532	742.247	822.923	833.56	788.716	1026.12	810.116	696.789	759.971	806.412	848.554	849.666	816.467	0.147875	0.14339	0.902579
Gm13212	81.2532	97.2333	89.4722	291.962	286.915	363.046	63.5385	71.1727	43.5278	266.895	324.905	244.425	185.362	1.98882	1.03977e-30	0.251944
Olfr648	88.7014	105.898	103.832	421.531	334.934	360.306	89.1304	89.6248	112.937	384.878	397.49	352.352	236.801	1.94584	1.79366e-76	0.259564
Nrsn1	32.5013	11.5525	12.1505	86.3792	114.046	43.8395	18.5321	11.4228	5.88213	60.71	38.8849	15.8717	37.6477	1.94432	0.000391737	0.259836
9030624G23Rik	206.519	187.728	240.802	228.041	234.094	223.308	202.97	221.426	259.99	235.967	228.125	214.797	223.647	0.0544977	0.761369	0.96293
9030624J02Rik	2447.75	2475.12	2667.6	2400.48	2297.72	2616.67	2568.01	2525.31	2776.37	2563.57	2373.7	2588.15	2525.04	-0.0586899	0.447748	1.04152
9130008F23Rik	48.0748	51.9861	89.4722	67.3758	78.0313	83.5691	45.0064	38.6617	35.2928	66.4374	61.3517	57.1382	60.1998	0.424498	0.187393	0.745098
9130011E15Rik	924.256	1055.13	995.24	1038.28	981.993	1011.05	984.847	1006.96	1002.31	932.414	936.693	957.594	985.564	-0.0256008	0.794451	1.0179
9130019O22Rik	348.035	322.507	362.307	322.195	337.335	361.676	386.526	348.834	391.75	368.842	324.041	375.631	354.14	-0.0489737	0.730996	1.03453
9130023H24Rik	379.859	398.56	371.144	384.388	372.149	412.366	337.99	401.554	387.044	378.006	447.608	368.224	386.574	0.0557199	0.684043	0.962114
9130230L23Rik	30.47	48.1353	35.347	19.8672	22.8091	49.3195	45.8889	35.147	29.4106	28.6368	34.5643	28.5691	34.0137	-0.302706	0.466726	1.23346
9130401M01Rik	1971.75	1887.87	1828.1	1891.71	1735.9	1615.21	1964.4	1943.63	1647	1820.15	1780.06	1531.09	1801.41	-0.116199	0.207016	1.08388
9230104M06Rik	45.3664	8.66436	27.6149	35.4155	31.2125	31.5097	32.6517	25.4816	18.8228	42.3825	14.6898	33.8597	28.9726	0.235952	0.726352	0.849125
9230110C19Rik	440.122	511.197	480.499	420.667	420.168	443.875	420.06	475.363	572.919	399.77	497.726	363.992	453.863	-0.183847	0.172547	1.13591
9230113P08Rik	8.80243	15.4033	9.94136	19.8672	14.4058	16.4398	15.0021	7.0294	10.5878	9.16377	14.6898	19.0461	13.3649	0.500353	0.338484	0.706934
Gm45015	124.588	77.9792	133.656	495.817	510.204	534.295	147.374	131.801	152.935	473.08	459.705	444.408	307.154	1.92668	1.81089e-48	0.263034
9330151L19Rik	496.999	656.566	582.122	550.236	516.207	493.195	566.552	627.374	708.208	621.991	669.684	542.813	585.995	-0.0957331	0.582151	1.06861
9330159F19Rik	257.979	54.8743	53.0206	54.4189	156.063	53.4295	57.3612	33.3896	28.2342	20.6185	40.6131	28.5691	69.8809	-0.461865	0.639105	1.37732
9330161L09Rik	14.2193	15.4033	14.3597	9.50172	18.0072	9.5899	15.0021	15.8161	11.7643	14.8911	6.04876	10.5811	12.9321	-0.362711	0.519019	1.28584
Olfr1388	777.323	335.985	702.522	2289.05	1685.48	2709.83	606.263	310.172	512.922	2192.43	1481.95	1950.11	1296.17	1.92266	1.19014e-17	0.263768
2200002D01Rik	37.2411	23.105	28.7195	102.791	64.826	91.7891	43.2415	30.7536	19.9992	159.221	146.898	131.206	73.3159	1.91828	4.93054e-12	0.264569
9430020K01Rik	2487.7	2763.93	2918.34	2607.79	2746.7	2571.46	2275.03	2397.02	2612.84	2473.07	2481.72	2756.39	2591	0.0175209	0.902531	0.987929
9430025C20Rik	42.6579	51.9861	34.2424	63.9206	78.0313	39.7296	45.0064	48.3271	45.8806	46.9643	63.0799	96.2885	54.6762	0.537215	0.0687066	0.6891
9430038I01Rik	453.664	503.495	463.93	507.91	466.987	463.055	495.071	410.341	455.277	521.19	464.026	470.861	472.984	0.0585008	0.62766	0.960261
9530068E07Rik	10280.6	11713.2	11173	10453.6	10306.1	10464	10194.4	10849.9	10945.5	9745.67	10058.2	10238.3	10535.2	-0.0886092	0.100586	1.06334
9530077C05Rik	176.049	175.213	182.258	160.665	159.664	182.208	156.199	192.43	184.699	147.766	182.327	149.194	170.723	-0.118148	0.460287	1.08534
Lipo3	151.673	191.579	123.715	532.96	492.197	502.785	134.137	128.287	152.935	555.554	606.604	581.963	346.199	1.89197	3.47748e-65	0.269439
9930021J03Rik	3130.96	2863.09	3388.9	2902.34	2637.46	3534.56	3296.06	2864.48	3141.06	3176.39	2925.87	3253.7	3092.91	-0.0201131	0.901944	1.01404
9930111J21Rik2	228.186	222.385	284.986	274.686	246.099	298.657	277.099	202.095	287.048	284.077	257.504	295.214	263.17	0.144554	0.390964	0.904659
A130010J15Rik	804.407	913.608	772.112	713.493	726.291	728.833	757.167	780.263	684.68	699.883	799.3	634.869	751.242	-0.131688	0.23572	1.09557
A130051J06Rik	17.6049	9.62706	18.7781	24.1862	21.6087	21.9198	22.9445	23.7242	14.1171	14.8911	31.972	17.988	19.9468	0.315762	0.534765	0.803427
A230050P20Rik	814.564	869.324	1051.57	674.622	839.136	816.512	987.494	872.524	1032.9	836.194	928.052	850.724	881.135	-0.185233	0.130645	1.137
A2m	12.188	9.62706	5.52298	19.0034	6.0024	10.9599	23.8269	16.6948	15.2935	21.764	20.7386	16.9298	14.8793	0.206383	0.799119	0.866707
A330044P14Rik	53.4917	75.0911	66.2757	46.6448	48.0192	58.9094	70.5983	50.9631	52.9392	38.946	76.9056	80.4167	59.9334	-0.0724536	0.876805	1.0515
A3galt2	130.682	127.077	124.819	114.021	97.239	126.039	138.549	152.889	157.641	132.875	146.898	137.555	132.19	-0.135131	0.512341	1.09819
A430005L14Rik	984.518	975.222	1058.2	945.853	995.199	1054.89	1020.15	1037.71	1042.31	973.651	1008.41	1036.95	1011.09	-0.0247581	0.779577	1.01731
A430033K04Rik	631.744	639.237	608.632	683.26	755.102	661.703	722.751	738.087	684.68	678.119	770.784	680.368	687.872	0.0722755	0.528656	0.951137
A430078G23Rik	20.3133	16.366	13.2551	13.8207	24.0096	5.47994	22.9445	14.9375	16.47	16.0366	15.5539	16.9298	16.3431	-0.185844	0.765826	1.13748
A430105I19Rik	214.644	195.429	260.684	161.529	195.678	191.798	176.496	211.761	219.992	226.803	247.999	208.449	209.272	-0.0504903	0.848497	1.03562
A4galt	12.188	5.77624	4.41838	7.77413	12.0048	8.21992	12.3547	15.8161	18.8228	13.7457	17.2822	24.3366	12.7283	0.270145	0.741618	0.829236
A530084C06Rik	52.8146	34.6574	54.1252	50.9638	31.2125	39.7296	81.1881	83.4741	116.466	60.71	60.4876	79.3586	62.099	-0.381949	0.4189	1.3031
Gm11281	15.5735	25.0304	22.0919	57.0103	63.6255	45.2095	16.7671	12.3014	16.47	85.9104	69.9928	73.0099	41.9161	1.88186	2.60735e-13	0.271334
A630010A05Rik	27.7615	20.2168	19.8827	23.3224	24.0096	28.7697	22.062	21.9669	19.9992	24.0549	14.6898	17.988	22.0603	-0.0205596	0.974259	1.01435
A630033H20Rik	74.4821	77.0165	66.2757	121.795	63.6255	68.4993	47.6539	51.8418	71.762	41.237	66.5363	101.579	71.0253	0.25907	0.534733	0.835626
A730015C16Rik	25.7302	36.5828	56.3343	39.7345	52.8212	42.4696	42.359	54.4778	55.292	45.8189	37.1566	27.511	43.024	-0.134424	0.776417	1.09765
A730017C20Rik	1694.81	1904.23	1515.5	1434.76	1304.92	1693.3	1629.06	1543.83	1292.89	1391.75	1564.9	1294.07	1522	-0.142767	0.3145	1.10402
A730046J19Rik	8.12532	19.2541	17.6735	12.0931	12.0048	23.2898	10.5898	20.2095	12.9407	17.1821	23.3309	21.1623	16.488	0.306281	0.606989	0.808724
A830005F24Rik	14.2193	14.4406	11.046	22.4586	18.0072	13.6999	10.5898	19.3308	22.3521	19.473	22.4668	15.8717	16.9963	0.308532	0.53975	0.807463
A830010M20Rik	223.446	224.311	207.664	200.4	141.657	208.238	251.507	243.393	299.989	206.185	246.271	277.226	227.524	-0.176112	0.462416	1.12984
A830018L16Rik	92.087	83.7555	87.263	69.9672	99.6399	94.529	138.549	94.0182	142.348	138.602	135.665	114.276	107.558	0.0355451	0.942235	0.975663
A830080D01Rik	1186.3	1476.79	1305.63	1175.62	984.394	1122.02	1120.75	1149.31	1143.49	1017.18	1301.35	967.117	1162.49	-0.1673	0.207977	1.12296
A930002H24Rik	10.1567	13.4779	12.1505	9.50172	10.8043	16.4398	12.3547	17.5735	18.8228	12.6002	10.3693	15.8717	13.3436	-0.165018	0.802408	1.12118
Gm2026	90.0557	63.5386	149.12	240.998	228.091	398.666	78.5407	55.3565	78.8205	366.551	273.058	387.27	200.839	1.88047	1.94426e-14	0.271596
A930017K11Rik	8.12532	11.5525	6.62757	12.9569	13.2053	16.4398	18.5321	8.78675	19.9992	13.7457	12.0975	16.9298	13.2499	0.22191	0.744363	0.85743
A930018M24Rik	4.73977	3.85083	9.94136	11.2293	6.0024	10.9599	22.9445	18.4522	27.0578	11.4547	18.1463	24.3366	14.093	-0.0637912	0.960952	1.04521
A930033H14Rik	186.882	260.893	173.421	265.184	234.094	219.198	214.442	217.033	208.227	249.713	254.048	214.797	224.828	0.19222	0.225802	0.875258
A930035D04Rik	68.3881	53.9116	66.2757	57.0103	61.2245	76.7192	68.8334	70.294	79.997	66.4374	53.5747	64.545	65.6009	-0.112605	0.688123	1.08118
AA414768	152.35	172.324	151.33	164.121	116.447	120.559	143.844	167.827	188.228	132.875	130.48	119.567	146.663	-0.304947	0.052542	1.23537
AA986860	100.889	104.935	96.0998	77.7413	94.838	84.9391	94.4253	119.5	101.173	104.238	107.149	100.521	98.8707	-0.116113	0.6052	1.08381
AB124611	31.1471	48.1353	27.6149	45.781	33.6135	27.3997	32.6517	30.7536	49.4099	35.5096	48.3901	44.4408	37.9039	0.12174	0.789774	0.919078
AF529169	104.952	106.86	81.74	84.6517	139.256	180.838	39.7116	29.8749	27.0578	45.8189	78.6338	77.2424	83.0531	0.629829	0.287061	0.646253
AI182371	14.8964	19.2541	30.9287	10.3655	21.6087	17.8098	15.8846	26.3602	23.5285	12.6002	16.4181	19.0461	19.0584	-0.41665	0.382213	1.33482
AI314180	5680.96	5897.54	5821.22	6316.05	5749.1	5959.44	5341.65	5327.41	5673.9	5867.11	5990	5829.15	5787.79	0.0823925	0.113465	0.94449
Otor	68.3881	119.376	87.263	358.474	310.925	341.126	60.0086	103.684	127.054	248.567	346.507	449.699	218.423	1.86909	3.06347e-20	0.273747
AI429214	138.808	192.541	182.258	155.483	136.855	172.618	136.784	173.978	159.994	194.73	168.501	133.322	162.156	-0.0310239	0.919623	1.02174
AI464131	274.23	312.88	268.417	263.457	282.113	191.798	302.69	340.047	351.751	234.822	227.26	332.248	281.809	-0.26926	0.126473	1.20519
Atp12a	34.5326	20.2168	19.8827	15.5483	85.2341	94.529	40.5941	30.7536	38.8221	205.039	197.881	67.7194	70.8961	1.84794	0.000523187	0.277789
AI593442	38.5953	14.4406	17.6735	21.5948	21.6087	2.73997	17.6496	10.5441	9.41141	12.6002	3.45643	14.8136	15.4273	-0.503473	0.576894	1.41762
AI597479	2086.85	2595.46	2334.01	2200.08	2229.29	2294.73	1963.52	2265.22	2290.5	2101.94	2481.72	2090.84	2244.51	-0.0138421	0.933046	1.00964
AI606181	513.25	687.372	459.512	451.763	459.784	393.186	441.24	636.161	487.04	451.316	585.001	315.318	490.079	-0.278494	0.189716	1.21293
AI661453	1235.05	1009.88	1115.64	972.63	974.79	1298.75	1126.93	1084.28	916.436	1001.14	858.059	1030.6	1052.02	-0.0835856	0.628273	1.05965
AI837181	1794.34	1523.96	1622.65	1709.45	1825.93	1605.62	1790.55	1797.77	1743.46	1772.04	1519.1	1786.1	1707.58	-0.0087337	0.953897	1.00607
AI846148	2118.68	1703.99	2187.1	2202.67	2183.67	2145.4	2187.67	2129.03	1909.34	2392.89	2069.54	2350.07	2131.67	0.124555	0.202439	0.917287
AI854703	123.234	76.0538	75.1125	107.11	108.043	86.3091	112.075	114.228	104.702	121.42	108.014	78.3005	101.217	0.00480811	0.990693	0.996673
AI987944	404.912	489.055	404.282	359.338	400.961	327.427	408.588	423.521	392.926	352.805	492.542	361.875	401.519	-0.133605	0.413005	1.09703
Hsd17b1	6.7711	13.4779	13.2551	37.1431	40.8164	23.2898	15.0021	9.66542	8.23498	50.4008	44.0695	38.0921	25.0182	1.83479	1.682e-08	0.280332
Arntl2	186.882	229.124	208.768	812.829	753.902	715.133	210.913	200.338	254.108	757.157	801.028	703.646	486.152	1.82633	5.81703e-110	0.281981
AU021092	34.5326	36.5828	24.3011	37.1431	31.2125	28.7697	17.6496	38.6617	35.2928	35.5096	23.3309	47.6152	32.5501	0.121085	0.818663	0.919496
Gm14292	212.613	224.311	187.781	642.662	719.088	697.323	228.562	190.672	187.052	793.812	718.938	732.216	461.252	1.80035	3.84976e-108	0.287106
AU040320	1830.23	1542.26	1839.15	1436.49	1609.84	1709.74	1811.73	1844.34	2084.63	1638.02	1560.58	1848.53	1729.63	-0.160219	0.125391	1.11746
AU041133	188.237	207.945	196.618	247.045	214.886	208.238	207.383	195.944	195.287	195.876	250.591	183.054	207.592	0.132428	0.394592	0.912295
AW011738	111.723	143.443	118.192	118.34	106.843	124.669	95.3078	89.6248	118.819	104.238	118.383	121.683	114.272	0.0404447	0.89328	0.972355
AW146154	482.78	619.983	557.82	478.541	515.006	558.954	548.902	557.08	611.741	541.808	687.83	478.268	553.226	-0.048604	0.810152	1.03426
AW209491	488.874	494.831	457.302	519.139	463.386	423.326	453.594	484.15	427.043	447.879	544.388	381.979	465.491	-0.0110244	0.960952	1.00767
Sox21	57.5544	26.9558	24.3011	44.0534	63.6255	87.6791	123.547	102.805	56.4684	561.281	464.026	140.729	146.086	1.79676	0.0425361	0.287821
AW551984	1140.93	1182.2	1487.89	1133.3	1429.77	1142.57	858.652	977.086	910.554	1001.14	902.129	1170.28	1111.37	0.0477016	0.872761	0.967476
AW554918	1256.04	1439.25	1257.03	1127.25	1224.49	1263.13	1291.95	1322.41	1357.6	1195.87	1400.72	1194.61	1277.53	-0.096815	0.281119	1.06941
AY074887	10.1567	6.73894	12.1505	12.0931	13.2053	15.0698	9.70727	17.5735	15.2935	22.9094	8.64108	4.23246	12.3143	0.0796273	0.93589	0.946302
Aaas	2857.41	2764.89	2645.51	2679.48	2805.52	2674.21	2632.44	2696.65	2449.32	2470.78	2629.48	2742.63	2670.69	-0.00519028	0.964034	1.0036
Aacs	2040.13	1724.21	1624.86	1826.92	1812.73	1517.94	1959.1	1880.36	1555.24	1765.17	1602.92	1544.85	1737.87	-0.0997215	0.433524	1.07157
Aaed1	385.276	446.696	504.8	364.52	420.168	408.256	407.705	454.275	514.098	411.224	468.347	456.048	436.784	-0.0970975	0.531635	1.06962
Aagab	2201.96	2196.9	2046.81	1896.02	1908.76	2053.61	2098.54	2099.15	2003.45	1988.54	2073	1592.46	2013.27	-0.136331	0.112815	1.09911
Abcb9	85.3159	86.6436	99.4136	288.507	337.335	261.667	109.427	87.8675	96.4669	360.824	323.176	372.456	209.092	1.78681	6.38971e-48	0.289812
Aamdc	336.524	360.052	361.203	383.524	368.548	376.746	398.881	395.404	488.217	407.788	363.789	415.839	388.043	-0.0111966	0.961637	1.00779
Aamp	7369.67	6602.24	7237.31	7199.71	7326.53	7392.44	7785.23	7894.01	7344.43	7451.29	6598.33	7538.01	7311.6	-0.0242714	0.811231	1.01697
Qrfp	18.9591	23.105	33.1379	94.1534	105.642	95.899	29.1218	25.4816	39.9985	105.383	79.4979	79.3586	60.8115	1.7452	6.30625e-17	0.298293
Aard	243.76	346.574	417.537	525.186	474.19	263.037	182.673	159.919	175.287	187.857	200.473	203.158	281.638	0.282079	0.593099	0.822405
Aars	8604.04	7678.55	8894.2	9123.38	8857.15	8887.1	7918.49	8277.12	7052.67	8426.09	7674.14	9254.27	8387.27	0.108658	0.245201	0.92745
Aars2	1461.2	1246.7	1346.5	1392.43	1515.01	1375.47	1549.63	1401.49	1329.36	1499.42	1309.99	1597.75	1418.75	0.058658	0.615354	0.960157
Aarsd1	2237.85	1937.93	1876.71	2203.53	2292.92	2112.52	1945.87	1948.9	1736.4	2079.03	2092.87	2115.17	2048.31	0.140655	0.0705846	0.907107
Aasdh	775.968	786.531	772.112	732.496	770.709	852.131	830.413	816.289	1018.78	859.104	821.767	791.47	818.981	-0.0497451	0.729598	1.03508
Aasdhppt	1577.67	1993.76	1641.43	1770.77	1627.85	1642.61	1454.33	1548.23	1532.88	1641.46	1897.58	1445.38	1647.83	0.0412879	0.808946	0.971787
Aass	179.434	147.294	173.421	153.755	194.478	216.458	135.019	155.525	145.877	175.257	134.801	134.381	162.142	0.097711	0.70761	0.934515
Aatf	1298.7	1361.27	1249.3	1560.01	1385.35	1338.48	1122.51	1141.4	1162.31	1289.8	1454.29	1142.76	1292.18	0.156233	0.159131	0.897365
Gm11839	27.0844	3.85083	20.9873	76.8775	96.0385	72.6093	20.297	31.6323	39.9985	73.3102	82.0903	78.3005	51.923	1.74012	1.34747e-06	0.299344
Abat	2279.83	2441.42	2440.05	2237.22	2279.71	2271.44	2420.64	2500.71	2706.96	2297.82	2483.45	2335.26	2391.21	-0.0872016	0.190249	1.06231
Abca1	1935.86	1968.73	2251.16	1922.8	1707.08	1904.28	2230.03	2089.49	3030.47	2175.25	2075.59	3348.93	2219.97	-0.039775	0.908964	1.02795
Abca12	35.2097	27.9185	30.9287	32.8241	43.2173	69.8693	34.4167	30.7536	28.2342	36.6551	28.5156	29.6272	35.6808	0.333971	0.391672	0.79335
Spaca1	10.1567	14.4406	12.1505	38.0069	51.6207	28.7697	15.8846	13.1801	10.5878	42.3825	40.6131	49.7314	27.2937	1.72049	1.07603e-09	0.303445
Abca3	1426.67	1349.71	1504.46	1430.44	1495.8	1459.04	1628.17	1658.94	1776.4	1621.99	1512.19	1800.91	1555.39	-0.00305426	0.987769	1.00212
Abca4	255.271	241.639	280.567	196.081	237.695	176.728	151.786	325.988	352.928	215.349	137.393	274.052	237.123	-0.37776	0.186648	1.29932
Gm28455	14.2193	15.4033	18.7781	28.5052	48.0192	38.3596	7.94231	9.66542	12.9407	46.9643	55.3029	40.2084	28.0257	1.71529	2.88725e-08	0.304542
Abca6	16.2506	8.66436	22.0919	14.6845	18.0072	16.4398	33.5342	17.5735	41.1749	6.87283	1.72822	3.17434	16.683	-1.20521	0.0991752	2.3057
Abca7	867.378	711.44	846.12	765.32	810.325	924.74	894.834	839.134	970.551	884.304	788.067	971.349	856.13	0.00315606	0.988098	0.997815
Abca8a	130.682	286.887	321.437	251.364	216.087	165.768	120.017	100.169	178.817	21.764	42.3413	104.753	161.674	-0.504205	0.59763	1.41834
Abca8b	64.3255	137.667	159.062	186.579	135.654	115.079	98.8377	98.4116	157.641	89.3468	83.8185	106.87	119.441	0.0103464	0.986538	0.992854
Abca9	314.856	359.089	384.399	247.045	259.304	289.067	157.081	198.581	247.049	108.82	124.432	189.403	239.927	-0.44891	0.249337	1.36501
Abcb10	1846.48	1889.79	1775.08	1851.97	1974.79	1670.01	1738.48	2000.74	1914.05	1961.05	1879.44	1745.89	1853.98	-0.0100125	0.937876	1.00696
Ica1l	122.557	62.5759	36.4516	298.872	291.717	293.177	109.427	65.9006	123.525	302.405	276.515	250.773	186.158	1.71515	1.39338e-11	0.30457
Abcb1b	115.786	130.928	98.309	106.246	117.647	73.9792	105.015	103.684	105.878	91.6377	103.693	116.393	105.766	-0.109719	0.652508	1.07902
Abcb4	48.7519	64.5013	60.7527	50.1	58.8236	41.0996	59.1261	59.7499	67.0563	37.8006	30.2438	58.1963	53.0168	-0.379241	0.16914	1.30066
Vsig2	37.2411	34.6574	34.2424	128.705	115.246	102.749	30.8868	37.783	39.9985	105.383	105.421	144.962	76.4396	1.71395	1.53512e-24	0.304824
Abcb7	1562.77	1659.71	1645.85	1398.48	1237.7	1700.15	1336.07	1286.38	1349.36	1254.29	1390.35	1392.48	1434.47	-0.0788352	0.628088	1.05616
Abcb8	1912.16	1594.24	1777.29	1734.5	1984.39	1822.08	1969.69	1941.87	2090.51	1916.37	1762.78	2133.16	1886.59	0.00825068	0.964034	0.994297
Zfp966	209.904	214.684	275.044	694.489	480.192	1045.3	205.618	197.702	255.284	727.375	609.196	882.468	483.105	1.70994	1.01984e-22	0.305673
Abcc1	2615.68	2413.5	2402.49	2566.33	2606.24	2626.26	2095.89	2142.21	1992.87	2180.98	2261.37	2070.73	2331.21	0.0661563	0.659718	0.955179
Aph1b	263.396	270.52	257.371	752.363	824.73	809.662	239.152	231.091	229.403	759.448	915.955	792.528	528.802	1.70174	1.3854e-109	0.307415
Abcc12	23.6989	31.7693	16.5689	23.3224	20.4082	27.3997	22.9445	28.9963	44.7042	17.1821	13.8257	17.988	24.0673	-0.491798	0.25211	1.4062
Abcc3	30.47	25.9931	39.7654	19.0034	27.6111	12.3299	43.2415	32.511	18.8228	22.9094	28.5156	33.8597	27.9194	-0.398962	0.364569	1.31856
Abcc4	221.415	213.721	189.99	215.948	208.884	246.597	233.857	240.757	217.639	234.822	285.156	259.238	230.669	0.1384	0.374329	0.908526
Abcc5	6163.06	6069.86	6629.78	6426.62	6866.75	6337.55	6840.98	6429.26	7470.3	7242.82	7019.15	7251.26	6728.95	0.0554808	0.58163	0.962274
Gm12424	14.2193	19.2541	12.1505	34.5517	39.6159	35.6196	6.17736	9.66542	5.88213	30.9277	37.1566	43.3827	24.0503	1.70016	2.43951e-07	0.307753
Abcc8	89.3786	62.5759	74.0079	59.6017	90.0361	63.0194	119.135	95.7756	115.29	108.82	106.285	113.218	91.4286	-0.0381391	0.941288	1.02679
Gm11400	62.2941	42.3591	57.4389	186.579	206.483	209.608	86.483	54.4778	69.4091	213.058	165.045	225.378	131.551	1.69159	1.57329e-24	0.309585
Abcd1	925.61	863.548	1001.87	1002.86	1081.63	939.81	999.849	1000.81	1201.13	1091.63	1042.98	1330.05	1040.15	0.116237	0.44022	0.922591
Tcp11l1	815.241	777.867	769.903	2287.32	2388.96	2439.94	871.89	666.036	787.029	2660.93	2561.22	2387.11	1617.79	1.65068	1.30868e-138	0.318491
Abcd3	3140.44	3846.01	3418.72	3338.56	3295.32	3412.63	3435.49	3599.05	3653.98	3542.94	3918.73	3519.29	3510.1	-0.00365745	0.980098	1.00254
Abcd4	791.542	746.097	903.559	807.646	866.747	779.522	941.605	928.759	1018.78	907.214	886.575	913.153	874.267	-0.0445591	0.777714	1.03137
Abce1	9784.24	11512	9653.06	11077.3	10698.7	10411.9	8748.02	9443.12	8862.02	10090.5	11690.5	8983.4	10079.6	0.118204	0.303134	0.921334
Abcf1	6949.86	6728.35	6798.78	7673.93	7294.12	7491.08	6954.82	7111.12	6478.58	7140.87	7116.79	6954.99	7057.78	0.089882	0.050128	0.9396
Abcf2	6422.39	6196.94	5775.93	6559.64	6799.52	6096.44	5889.67	6060.22	5284.51	6628.84	6471.31	5814.34	6166.65	0.106515	0.169291	0.928829
Abcf3	2682.03	2718.68	2713.99	2808.19	2805.52	2674.21	2835.41	2875.9	2856.36	2892.32	2866.25	2824.11	2796.08	0.0174374	0.793348	0.987986
Abcg1	654.089	584.363	632.933	558.01	499.4	597.314	619.501	586.955	505.863	567.009	479.58	565.033	570.837	-0.138016	0.22901	1.10039
Abcg2	1658.92	2343.23	1939.67	2065.33	1873.95	1894.69	1628.17	1733.63	1772.87	1675.83	1879.44	1714.15	1848.32	0.00423151	0.984677	0.997071
Abcg3	18.9591	30.8066	23.1965	35.4155	42.0168	31.5097	20.297	22.8455	31.7635	26.3458	29.3797	27.511	28.3372	0.392949	0.259781	0.761571
Abcg4	272.198	271.483	280.567	299.736	339.736	286.327	403.293	385.738	452.924	395.188	359.469	462.396	350.755	0.0544702	0.875773	0.962948
2210418O10Rik	241.728	281.11	271.73	895.753	779.112	819.252	269.156	313.687	349.399	1004.58	991.132	878.235	591.239	1.64194	2.13785e-59	0.320426
Abcg8	40.6266	30.8066	69.5895	30.2327	26.4106	28.7697	48.5364	42.1764	107.055	40.0915	40.6131	41.2665	45.5145	-0.693048	0.089421	1.6167
Abhd10	878.889	1025.28	889.199	874.158	777.912	880.901	878.949	1009.6	994.08	762.884	936.693	827.446	894.666	-0.163535	0.0815656	1.12003
Grm7	48.7519	50.0607	47.4976	95.881	116.447	108.229	25.5919	9.66542	15.2935	116.838	89.0031	88.8817	67.6784	1.63767	1.25878e-05	0.321375
Abhd12	1984.61	1819.52	1906.53	1958.22	2058.82	2005.66	1925.57	1890.03	1972.87	1963.34	1915.73	2068.61	1955.79	0.0566692	0.3103	0.961481
Abhd12b	19.6362	15.4033	33.1379	38.0069	22.8091	28.7697	24.7094	27.2389	9.41141	36.6551	30.2438	33.8597	26.6568	0.556737	0.168668	0.679838
Abhd13	2306.91	2389.44	2220.24	2293.37	2148.86	2291.99	2057.94	2056.1	2077.57	1966.77	2253.59	1851.7	2159.54	-0.0337096	0.801795	1.02364
Sfi1	2574.37	2485.71	2679.75	7661.84	8433.38	7691.1	2672.15	2776.61	3017.53	8780.04	8972.03	8787.64	5544.35	1.63547	9.85453e-162	0.321866
Rxfp1	45.3664	13.4779	22.0919	83.7879	69.6279	102.749	31.7693	27.2389	4.7057	73.3102	72.5851	50.7895	49.7916	1.62212	0.000107629	0.324858
Gfra3	61.617	58.7251	93.8906	248.772	236.495	135.629	28.2393	57.9925	72.9384	156.93	166.773	187.286	125.441	1.6086	7.08004e-10	0.327915
Abhd16a	2218.21	1912.9	2223.55	1904.66	2180.07	2028.95	2387.11	2296.86	2302.27	2050.39	1890.67	2309.86	2142.13	-0.110255	0.260784	1.07942
Abhd17a	3298.88	2498.22	3234.25	2952.44	3032.41	2953.69	3491.97	3573.57	3352.81	3179.83	2374.57	3226.19	3097.4	-0.13483	0.340088	1.09796
Abhd17b	1470.68	1782.93	1473.53	1526.32	1501.8	1471.36	1270.77	1466.51	1345.83	1616.26	1851.78	1416.82	1516.22	0.0916859	0.531245	0.938425
Abhd17c	2627.19	2586.79	2438.95	2658.75	2583.43	2605.71	2417.99	2503.34	2292.85	2620.84	2679.6	2398.75	2534.52	0.0636735	0.347872	0.956825
Abhd18	479.394	587.251	521.369	586.515	466.987	519.225	509.191	513.146	576.449	533.79	626.478	538.58	538.198	0.0436554	0.789446	0.970194
Abhd2	3874.43	3724.71	3762.25	4183.35	3681.87	4197.64	3736.42	3715.92	3679.86	3945	3950.7	3718.22	3847.53	0.073697	0.207718	0.9502
Abhd3	33.8555	37.5455	41.9746	19.0034	40.8164	34.2496	64.421	71.1727	78.8205	37.8006	39.749	39.1503	44.8799	-0.636736	0.0894986	1.55481
Abhd4	2004.92	2165.13	2331.8	1818.28	1690.28	2135.81	2332.39	2522.68	2795.19	2138.6	2136.08	2205.11	2189.69	-0.222558	0.0607813	1.1668
Abhd5	1224.22	1344.9	1121.16	1351.84	1279.71	1139.83	1148.11	1267.93	1192.9	1224.51	1397.26	1122.66	1234.58	0.0434863	0.738734	0.970307
Abhd6	354.129	375.455	367.83	382.66	391.357	405.516	378.584	401.554	382.338	435.279	423.413	359.759	388.156	0.0862754	0.431695	0.941951
Abhd8	2684.07	2099.66	2622.31	2659.62	2710.69	2442.68	2968.66	2708.08	2561.08	2800.68	2213.84	2877.01	2612.36	0.00520854	0.980634	0.996396
Abi1	3223.72	3835.42	3455.17	3366.2	3332.53	3452.36	3071.03	3211.56	3062.24	3213.05	3698.38	3115.09	3336.4	0.0232255	0.865863	0.98403
Abi2	3389.61	3526.39	3479.47	3576.1	3240.1	3623.61	2830.11	2890.84	3017.53	2920.95	3266.33	3185.98	3245.59	0.0502904	0.713271	0.965742
Abi3	306.054	264.744	249.638	405.119	360.144	175.358	262.979	386.617	292.93	343.642	220.348	508.953	314.71	0.192253	0.611587	0.875238
Abi3bp	1692.78	2209.41	2311.92	1714.63	2408.16	2028.95	1439.32	1385.67	1610.53	1585.33	1792.16	1730.02	1825.74	0.0802931	0.763364	0.945865
Abl1	15130	13599.2	15468.7	13674.7	15055.2	14594.5	15899.6	16005.1	15205.3	15290.9	13586.4	15628.4	14928.2	-0.0561854	0.509473	1.03971
Abl2	4051.15	3784.4	3888.17	4084.87	3746.7	4055.16	3849.37	3407.5	3746.92	3848.78	3745.91	3807.1	3834.67	0.0348571	0.679796	0.976128
Gm2115	569.45	642.125	510.323	1976.36	2022.81	1442.6	655.682	692.396	571.743	2027.48	1964.12	1630.56	1225.47	1.60293	7.99745e-53	0.329207
Gm20379	824.72	1069.57	814.087	2509.32	2258.1	2789.29	746.578	847.043	745.854	2367.69	2881.8	2376.53	1685.88	1.5885	3.20554e-60	0.332516
Ablim3	98.181	40.4337	47.4976	54.4189	122.449	38.3596	71.4808	64.1433	79.997	60.71	47.5259	47.6152	64.401	-0.120925	0.848642	1.08743
Abr	6970.17	6784.19	6923.6	5942.89	6420.17	6877.33	6762.44	6967.01	6807.98	6556.68	6456.62	6839.65	6692.39	-0.0769408	0.144883	1.05478
Abracl	2673.91	2927.59	2400.29	2777.09	2732.29	2352.27	2335.92	2374.18	2098.74	2538.37	2898.22	2019.94	2510.73	0.0486416	0.803244	0.966846
Abt1	899.88	868.361	856.061	867.248	791.117	874.051	835.708	889.219	788.205	888.886	854.603	878.235	857.631	0.00247774	0.984064	0.998284
Gm2237	229.54	135.742	97.2044	475.086	392.557	468.535	182.673	68.5366	182.346	470.789	515.873	371.398	299.19	1.58586	2.39546e-10	0.333127
Abtb2	1002.12	942.49	1250.4	1113.43	1264.11	1122.02	1055.45	974.45	972.904	1056.12	972.122	1266.56	1082.68	0.132441	0.309649	0.912286
Myh13	25.0531	19.2541	12.1505	84.6517	66.0264	21.9198	10.5898	11.4228	7.05856	24.0549	29.3797	32.8016	28.6969	1.58477	0.00192003	0.333378
5930422O12Rik	11.5109	13.4779	9.94136	35.4155	36.0144	27.3997	10.5898	6.15072	11.7643	25.2004	31.1079	33.8597	21.036	1.58311	3.52163e-07	0.333761
Alx1	20.9904	58.7251	59.6481	138.207	140.456	54.7994	58.2436	84.3528	61.1741	221.076	228.125	226.437	112.686	1.56234	6.36751e-05	0.338602
Rhox8	14.8964	29.8439	9.94136	37.1431	31.2125	20.5498	64.421	13.1801	8.23498	100.802	150.355	65.6031	45.5152	1.52805	0.0316527	0.346745
Dpt	16.2506	19.2541	64.0665	63.9206	97.239	47.9495	3.52992	11.4228	2.35285	30.9277	57.0311	38.0921	37.6697	1.52688	0.0435342	0.347026
Acad10	188.914	188.69	180.049	183.124	213.686	234.268	212.678	191.551	216.462	261.168	202.201	205.274	206.505	0.136719	0.399358	0.909585
Acad11	776.645	851.995	827.342	769.639	762.305	765.822	795.114	811.896	841.145	745.702	813.126	684.6	787.111	-0.107907	0.14541	1.07766
Acad12	177.403	219.497	167.898	201.264	178.872	173.988	188.851	166.948	208.227	215.349	214.299	185.17	191.48	0.0575314	0.779754	0.960907
Gm3512	128.651	138.63	78.4262	361.929	358.944	289.067	111.192	94.0182	170.582	360.824	418.228	282.517	232.751	1.52505	3.66741e-17	0.347467
Kcna4	60.2628	149.219	139.179	336.015	369.748	374.006	115.605	157.283	181.17	324.168	416.5	475.094	258.188	1.52278	7.41644e-12	0.348015
Acadl	1491.67	1680.89	1527.65	1464.99	1459.78	1628.91	1433.15	1507.81	1561.12	1387.17	1545.89	1510.99	1516.67	-0.0322704	0.743424	1.02262
Acadm	1579.02	1754.05	1831.42	1928.85	1930.37	1772.76	1682.89	1953.29	2109.33	1849.94	1980.54	1845.35	1851.48	0.0536297	0.663085	0.963509
Acads	1484.23	1194.72	1492.31	1498.68	1430.97	1393.28	1517.86	1607.97	1599.94	1493.7	1324.68	1696.16	1477.87	-0.00950239	0.962346	1.00661
Acadsb	2942.72	3469.59	3343.61	2942.08	2996.4	3153.71	3036.61	2976.95	3478.69	3125.99	3422.73	3007.16	3158.02	-0.044719	0.679455	1.03148
Acadvl	2713.86	2573.31	2799.04	2631.11	2680.67	2405.7	2913.95	2870.63	2985.77	2722.79	2559.49	2659.04	2709.61	-0.105466	0.0944582	1.07584
Acan	12.8651	4.81353	15.4643	16.4121	19.2077	10.9599	33.5342	36.9043	11.7643	14.8911	10.3693	19.0461	17.186	-0.350102	0.668117	1.27465
Fcgr2b	43.3351	54.8743	58.5435	220.267	219.688	73.9792	36.1817	33.3896	45.8806	92.7832	109.742	53.9639	86.8857	1.50588	0.000103408	0.352115
Acap2	5425.01	5724.25	6017.83	5953.26	5756.31	6069.04	5593.15	5183.3	5090.4	5742.25	5960.62	5819.63	5694.59	0.0958474	0.110792	0.935722
Acap3	2726.72	2227.7	2430.11	2861.74	2969.99	2450.9	2606.84	2570.12	2476.38	2971.35	2488.63	2882.3	2638.57	0.144275	0.116076	0.904834
Acat1	5737.83	6327.87	5452.28	6291.86	6328.94	5512.82	5082.2	5760.59	5608.02	5445.57	5945.93	5618.59	5759.38	0.0492581	0.642535	0.966433
Gm20878	138.13	167.511	175.631	428.441	487.395	371.266	163.259	147.617	230.579	489.116	516.737	574.556	324.187	1.49588	7.18486e-26	0.354564
Acat3	81.9303	72.203	115.982	80.3327	81.6327	102.749	68.8334	62.3859	91.7612	97.3651	131.344	102.637	90.7631	0.282313	0.308839	0.822272
Acbd3	2816.78	3170.19	2981.3	3114.84	3164.47	2861.9	2634.2	2809.12	2706.96	2751.42	3103.88	2843.15	2913.18	0.0601095	0.522104	0.959191
Acbd4	471.946	451.509	521.369	391.298	450.18	449.355	552.432	522.812	570.567	501.717	460.57	535.406	489.93	-0.147851	0.257567	1.10792
Acbd5	1561.42	1753.09	1726.48	1422.67	1442.98	1501.5	1554.05	1471.78	1662.29	1423.82	1607.24	1490.88	1551.52	-0.128651	0.0853774	1.09327
Acbd6	2132.9	1807.96	2044.61	2092.11	2006	1978.26	2129.42	2170.33	2086.98	2056.12	1811.17	2113.06	2035.74	-0.0378831	0.714853	1.02661
Fam171b	1460.53	1703.99	1725.38	5385.75	5134.46	4583.97	2002.35	1693.21	2218.74	4926.67	5194.15	5196.4	3435.47	1.49479	2.37977e-61	0.354833
Acd	2044.2	1698.21	2021.41	1986.72	2072.03	1833.04	2285.62	2149.24	2225.8	2136.3	1792.16	2303.52	2045.69	-0.0353578	0.83389	1.02481
Ace	91.4099	104.935	113.773	78.6051	66.0264	87.6791	67.0684	57.1139	51.7627	56.1281	54.4388	86.7654	76.3089	-0.181493	0.658996	1.13406
Acer1	11.5109	10.5898	15.4643	10.3655	21.6087	15.0698	13.2372	10.5441	15.2935	5.72736	9.50519	11.6393	12.5463	-0.0611737	0.944072	1.04331
Acer2	872.795	872.212	892.513	1028.78	920.769	995.98	791.584	833.862	789.382	894.613	966.073	709.995	880.713	0.126722	0.320022	0.91591
Gm4540	95.4726	20.2168	28.7195	155.483	108.043	90.4191	53.8312	28.9963	30.5871	126.002	152.083	98.4047	82.3548	1.48984	0.000115557	0.356053
Sertm1	72.4508	55.837	38.6608	182.26	206.483	87.6791	130.607	119.5	111.76	473.08	381.072	152.369	167.646	1.48806	0.000868743	0.356493
Tmem132b	289.803	361.015	192.2	784.324	839.136	595.944	264.744	111.592	249.402	589.918	845.962	445.466	464.125	1.48123	5.45331e-09	0.358184
Hist1h3h	43.3351	18.2914	51.916	109.702	78.0313	75.3492	40.5941	33.3896	10.5878	93.9287	93.3237	101.579	62.5023	1.47115	6.8934e-06	0.360695
Ackr2	34.5326	45.2472	37.5562	30.2327	25.2101	21.9198	34.4167	31.6323	38.8221	40.0915	13.8257	23.2785	31.3971	-0.525783	0.13298	1.43971
Ackr3	2302.17	2047.68	1920.89	1953.9	2151.26	2596.12	3010.14	2728.29	2642.25	3030.92	2923.28	2966.95	2522.82	0.0924348	0.703688	0.937938
Ackr4	225.478	338.873	260.684	306.646	258.103	221.938	251.507	271.511	212.933	284.077	208.25	192.577	252.715	-0.0841855	0.760758	1.06009
Acly	23374.5	21890	21139.7	22286.7	21102.1	22314.3	21799.9	22722.5	18962.8	21492.5	20947.7	21050.1	21590.2	-0.007955	0.945562	1.00553
AK157302	272.875	279.185	297.136	734.224	743.098	724.723	207.383	234.606	287.048	628.864	775.969	727.983	492.758	1.46181	2.4152e-53	0.363037
Acnat1	70.4195	46.2099	47.4976	59.6017	43.2173	46.5795	52.9488	43.9337	45.8806	61.8555	45.7977	34.9178	49.905	-0.0796159	0.854464	1.05674
Aco1	3261.64	3242.4	3336.98	3730.72	3666.27	3577.03	3595.22	3747.55	3792.8	4172.95	3787.39	4415.51	3693.87	0.155013	0.0759294	0.898124
Gm9392	33.8555	36.5828	20.9873	87.243	74.4298	83.5691	30.8868	24.6029	37.6456	74.4557	106.285	79.3586	57.4919	1.45716	6.83254e-13	0.36421
Dlk2	233.603	116.487	129.238	412.893	511.405	331.537	193.263	165.191	104.702	537.226	322.312	480.384	294.853	1.45486	3.36155e-11	0.364791
Acot11	292.512	331.171	363.412	297.145	283.313	235.638	315.928	410.341	411.749	284.077	294.661	500.488	335.036	-0.162253	0.56392	1.11903
Acot12	14.2193	17.3287	19.8827	12.0931	14.4058	8.21992	30.0043	16.6948	14.1171	11.4547	9.50519	12.6974	15.0519	-0.713396	0.111603	1.63966
Wfdc2	119.171	83.7555	130.342	279.005	289.316	356.196	150.904	147.617	147.053	438.716	362.925	399.967	242.081	1.44947	4.59277e-18	0.366155
Acot2	344.649	345.612	373.353	412.893	423.77	368.526	408.588	368.165	427.043	422.679	333.546	401.026	385.821	0.0609015	0.702388	0.958665
Acot4	29.1157	26.9558	23.1965	17.2758	15.6063	24.6597	30.8868	22.8455	41.1749	28.6368	19.0104	41.2665	26.7192	-0.251047	0.621415	1.19007
Acot6	284.386	339.835	347.947	363.657	308.524	249.337	329.165	329.503	331.752	318.441	317.992	313.202	319.478	-0.0600195	0.726352	1.04248
Acot7	3088.3	2558.87	2667.6	2797.82	2843.94	2924.92	3064.85	2860.97	2903.42	2973.64	2622.57	2672.8	2831.64	-0.0274152	0.81107	1.01918
Acot8	418.454	396.635	402.073	440.534	408.164	380.856	465.949	420.885	463.512	470.789	374.159	438.06	423.339	-0.0301246	0.857663	1.0211
Acot9	1206.61	1378.6	1135.52	1189.44	1139.26	1201.48	1137.52	1174.79	1118.78	1083.62	1231.35	894.107	1157.59	-0.0858638	0.534692	1.06132
Acox1	2476.19	2663.81	2638.88	2429.85	2390.16	2465.97	2497.42	2636.9	2685.78	2571.58	2663.18	2564.87	2557.05	-0.0466525	0.473695	1.03287
Acox3	1040.04	1006.99	1060.41	1088.38	1151.26	1013.79	1176.34	1073.74	1214.07	1208.47	1244.32	1111.02	1115.74	0.055067	0.640202	0.96255
Acp1	3155.33	3674.65	2886.31	2891.98	2981.99	3040	2933.36	3155.32	2943.42	2788.08	3233.49	2624.12	3025.67	-0.0946484	0.379293	1.06781
Acp2	2634.64	2955.51	2849.86	2855.7	2941.18	2816.69	2898.06	2910.17	3228.11	2801.82	3007.96	2804	2891.98	-0.0192244	0.850158	1.01341
Cda	18.9591	15.4033	20.9873	50.9638	52.8212	35.6196	28.2393	16.6948	16.47	63.0009	50.9824	64.545	36.2239	1.44502	2.58563e-08	0.367288
Specc1	1925.02	1793.52	1747.47	5389.2	5171.67	4674.39	2024.41	2020.95	1929.34	5486.81	5690.15	4648.3	3541.77	1.44087	9.21548e-109	0.368346
Acpp	875.504	887.615	878.153	652.163	621.849	868.571	753.637	721.392	716.443	541.808	709.433	588.312	734.573	-0.280838	0.0536285	1.2149
Acr	31.1471	21.1795	19.8827	36.2793	32.413	13.6999	48.5364	45.6911	16.47	38.946	28.5156	40.2084	31.0807	0.0510634	0.949742	0.965225
Acrbp	737.373	746.097	857.166	694.489	716.687	617.864	943.37	951.605	1019.96	775.484	778.561	823.213	805.156	-0.251934	0.0503095	1.1908
Acrv1	18.9591	19.2541	17.6735	13.8207	21.6087	10.9599	18.5321	17.5735	9.41141	13.7457	12.9616	12.6974	15.5998	-0.25864	0.630685	1.19635
Acsbg1	45.3664	31.7693	33.1379	21.5948	22.8091	34.2496	68.8334	76.4447	75.2913	37.8006	32.8361	49.7314	44.1554	-0.73518	0.0654499	1.6646
Acsf2	2558.8	2736.97	2795.73	2718.35	2825.93	2838.61	2844.23	2813.52	2836.36	2747.99	2677.87	2863.26	2771.47	0.00775936	0.930809	0.994636
Acsf3	900.557	723.955	935.592	802.463	864.346	868.571	893.952	827.712	925.847	845.358	773.377	984.047	862.148	-0.0200233	0.911728	1.01398
Acsl1	889.046	944.415	920.128	838.742	849.94	885.011	839.238	881.311	828.204	753.72	796.708	827.446	854.492	-0.100403	0.201453	1.07207
Acsl3	4363.3	4921.36	3927.94	4198.9	4050.42	3661.97	4235.02	4206.22	3870.44	4054.97	4301.53	3448.4	4103.37	-0.105895	0.32741	1.07616
Olfr76	7.44821	11.5525	13.2551	34.5517	30.012	19.1798	12.3547	7.0294	11.7643	18.3275	33.7002	31.7434	19.2432	1.43882	7.04752e-05	0.36887
Acsl5	1758.46	1996.65	1790.55	1727.58	1671.07	1648.09	1574.34	1729.23	1617.59	1478.8	1546.75	1503.58	1670.23	-0.128458	0.163997	1.09312
Acsl6	117.817	39.471	32.0333	58.7379	105.642	61.6494	61.7736	49.2058	52.9392	93.9287	69.1286	63.4869	67.1511	0.344252	0.48102	0.787716
Acsm2	25.7302	23.105	48.6022	14.6845	10.8043	20.5498	32.6517	10.5441	39.9985	16.0366	23.3309	15.8717	23.4925	-0.820486	0.090406	1.766
Acsm3	25.7302	26.9558	34.2424	15.5483	25.2101	20.5498	22.9445	17.5735	39.9985	19.473	17.2822	23.2785	24.0656	-0.459995	0.247929	1.37554
Acss1	199.07	197.355	171.212	166.712	188.476	200.018	251.507	217.033	221.168	198.167	209.114	252.889	206.06	-0.0506897	0.842085	1.03576
Acss2	402.881	386.045	388.817	476.813	504.202	445.245	527.723	556.201	635.27	621.991	554.757	595.719	507.972	0.144631	0.533351	0.904611
Spr-ps1	282.355	240.677	268.417	779.141	779.112	749.382	314.163	254.816	359.986	721.647	750.91	767.133	522.312	1.40582	3.8866e-54	0.377405
Acta1	38.5953	10.5898	19.8827	11.2293	19.2077	9.5899	25.5919	21.0882	5.88213	9.16377	5.18465	7.4068	15.2843	-1.00632	0.116761	2.00878
Nrsn2	28.4386	9.62706	20.9873	45.781	51.6207	36.9896	34.4167	20.2095	32.9399	90.4923	86.4108	76.1843	44.5081	1.40451	0.000153787	0.377747
Morn1	160.475	144.406	138.074	443.989	470.589	382.226	164.141	146.739	221.168	407.788	425.141	439.118	295.321	1.40341	1.54945e-34	0.378033
Actc1	19.6362	9.62706	14.3597	4.31896	21.6087	1.36999	33.5342	20.2095	3.52928	36.6551	3.45643	11.6393	14.9954	-0.365942	0.782126	1.28872
Actg-ps1	67.0339	37.5455	61.8573	66.512	40.8164	73.9792	51.1838	59.7499	43.5278	71.0192	35.4284	49.7314	54.8654	0.0609964	0.908811	0.958602
Actg1	115381	101260	99229.1	123385	115213	112657	104366	105135	95607	111398	101782	109264	107890	0.117527	0.118789	0.921766
Actg2	92.7641	56.7997	74.0079	67.3758	66.0264	95.899	86.483	87.8675	64.7034	59.5645	57.0311	79.3586	73.9901	-0.138329	0.674006	1.10063
Actl10	34.5326	30.8066	43.0792	42.3258	38.4154	32.8797	34.4167	23.7242	32.9399	56.1281	39.749	44.4408	37.7865	0.356302	0.243229	0.781164
Actl6a	4626.02	4810.64	4276.99	4620.43	4412.97	4582.6	4325.91	4389.86	3968.08	4438.7	4354.24	4166.86	4414.44	0.00905294	0.93831	0.993745
Actl6b	233.603	5.77624	2.20919	10.3655	115.246	5.47994	55.5962	7.90807	5.88213	5.72736	7.77697	6.34869	38.4933	-1.04789	0.603152	2.06751
Actn1	11550.1	10818.9	12088.7	11263.9	11546.2	12976.5	10975.4	11721.5	11324.3	11404.3	10297.6	13999.9	11663.9	0.061898	0.605471	0.958003
Actn2	46.7206	25.9931	33.1379	32.8241	43.2173	41.0996	45.0064	38.6617	34.1164	49.2553	39.749	30.6853	38.3722	0.0632131	0.895512	0.95713
Actn3	167.246	126.115	103.832	127.841	133.253	108.229	131.489	144.103	183.522	166.093	118.383	221.146	144.271	0.0307939	0.946636	0.978881
Actn4	20870.6	18843.1	19445.3	20217.9	21072	22441.7	20372	19677.9	19001.6	21381.4	19243.7	23654.2	20518.5	0.114694	0.103518	0.923578
Actr10	3079.5	3586.08	2983.51	3251.31	3082.83	3187.96	2857.47	3065.7	2818.72	2797.24	3410.63	2816.7	3078.14	0.0122975	0.941458	0.991512
Actr1a	6746.73	6248.93	6244.28	6777.32	6611.05	6918.43	6579.77	6551.4	6396.23	6545.23	6040.12	6652.37	6525.99	0.0278323	0.694226	0.980893
Actr1b	7882.24	7343.52	7638.27	8171.48	8170.47	7551.36	8091.45	7999.46	7737.35	7780.04	7287.89	7107.36	7730.08	-0.0195665	0.830503	1.01365
Actr2	8469.3	9758.95	7919.95	9865.37	9327.74	9028.21	7802	7845.69	7407.95	8667.78	9627.89	7986.65	8642.29	0.147583	0.140337	0.902762
Actr3	11751.2	13696.4	11569.5	11500.5	10821.1	11132.5	10782.1	11457	10324.3	10457	10938.7	9542.08	11164.4	-0.111845	0.26774	1.08061
Ttbk1	42.6579	8.66436	12.1505	56.1465	54.0216	61.6494	21.1795	14.0588	23.5285	53.8372	31.972	68.7775	37.387	1.39408	0.000839734	0.380487
Actr5	972.33	755.725	861.584	950.172	956.783	920.631	965.432	865.495	902.319	925.541	825.223	936.432	903.139	0.0490383	0.701229	0.96658
Actr6	719.091	873.175	744.497	734.224	738.296	713.763	668.919	691.517	663.504	613.973	876.206	649.683	723.904	-0.0100679	0.967276	1.007
Actr8	1663.66	1617.35	1637.01	1595.42	1681.87	1697.41	1521.39	1688.81	1689.35	1520.04	1549.35	1636.9	1624.88	-0.0213376	0.810924	1.0149
Acvr1	2845.89	3043.11	2972.47	3047.46	2961.59	2848.2	2642.14	3019.13	2854.01	2792.66	2734.9	2692.9	2871.21	-0.0247635	0.793277	1.01731
Acvr1b	3975.31	3674.65	3567.84	3449.12	3630.25	4044.2	3619.93	3553.36	3303.4	3844.2	3771.83	3465.33	3658.29	0.0322562	0.756839	0.97789
Acvr2a	1861.38	2055.38	1978.33	1792.37	1879.95	2294.73	1767.61	1642.24	1814.05	1754.86	1853.51	1640.08	1861.21	0.0117127	0.953183	0.991914
Acvr2b	845.034	463.062	832.865	584.788	578.632	934.33	833.943	519.297	763.5	739.975	486.493	824.271	700.516	-0.0387736	0.929444	1.02724
Acvrl1	1202.55	1194.72	1178.6	1356.15	1348.14	1142.57	1047.5	982.358	988.198	1271.47	1112.11	1243.28	1172.3	0.180221	0.0794232	0.882568
Acy1	1407.04	1424.81	1376.33	1465.86	1418.97	1296.01	1411.08	1368.1	1389.36	1412.37	1330.73	1375.55	1389.68	-0.0124716	0.890627	1.00868
Sox14	16.2506	14.4406	9.94136	56.1465	32.413	19.1798	12.3547	7.90807	8.23498	36.6551	25.9232	10.5811	20.8358	1.38176	0.00484746	0.383749
Acyp1	242.405	265.707	267.312	235.815	212.485	239.748	262.096	276.783	284.695	266.895	269.602	241.25	255.399	-0.119174	0.355958	1.08611
Acyp2	62.2941	69.3149	51.916	45.781	56.4226	47.9495	74.1283	62.3859	58.8213	64.1464	55.3029	68.7775	59.77	-0.168973	0.542074	1.12426
Mogat2	16.2506	6.73894	27.6149	59.6017	49.2197	52.0595	23.8269	20.2095	18.8228	41.237	31.972	60.3125	33.9888	1.38129	3.6668e-05	0.383875
Adad1	26.4073	27.9185	33.1379	17.2758	16.8067	24.6597	20.297	29.8749	31.7635	18.3275	19.8745	21.1623	23.9588	-0.519311	0.117512	1.43327
Adal	981.81	1234.19	1020.65	1017.55	903.962	1038.45	1007.79	1001.69	1088.19	980.524	1138.89	994.628	1034.03	-0.0585554	0.651742	1.04142
Adam10	6006.65	6357.71	6297.3	6062.96	6106.85	6511.54	5909.08	5918.75	6487.99	5729.65	6423.78	6215.37	6168.97	0.00320439	0.974808	0.997781
Adam11	860.607	721.067	812.982	944.125	901.561	764.452	992.789	899.763	923.494	1048.11	1006.69	1067.64	911.939	0.138851	0.33579	0.908242
Adam12	1104.37	1545.14	1542.01	1667.12	1575.03	1475.47	805.704	1181.82	1597.59	998.851	1029.15	1550.14	1339.37	0.0937839	0.782038	0.937062
Adam15	2803.91	2429.87	2938.22	2782.28	2884.76	2659.14	2865.41	2691.38	2876.36	2741.11	2537.89	3212.44	2785.23	0.0184289	0.899331	0.987307
Bmp8a	71.7737	85.6809	74.0079	244.453	181.273	104.119	67.9509	73.8087	25.8814	206.185	181.463	120.625	119.768	1.37686	3.11836e-06	0.385056
Kpna2-ps	70.4195	47.1726	11.046	177.077	138.055	234.268	59.1261	108.956	155.288	202.748	235.037	173.531	134.394	1.36204	0.00390365	0.389033
Ch25h	26.4073	16.366	24.3011	75.1499	111.645	91.7891	36.1817	36.9043	32.9399	57.2736	43.2054	67.7194	51.6569	1.36049	1.06622e-05	0.389451
Adam21	30.47	27.9185	18.7781	13.8207	21.6087	15.0698	22.9445	20.2095	23.5285	10.3092	14.6898	13.7555	19.4252	-0.705641	0.0556654	1.63087
Adam22	1462.56	1555.73	1642.53	1778.55	1638.66	1737.14	1606.11	1363.7	1769.34	1794.95	1686.74	1703.56	1644.97	0.139234	0.0947056	0.908001
Adam23	213.967	312.88	175.631	380.932	351.741	213.718	209.148	366.407	404.691	240.549	243.678	475.094	299.036	0.181504	0.674488	0.881783
Adam28	16.9278	11.5525	28.7195	12.9569	32.413	28.7697	16.7671	14.9375	27.0578	12.6002	29.3797	22.2204	21.1918	0.262419	0.672879	0.833689
Adam33	1327.14	1329.5	1586.2	1240.41	1273.71	1152.16	1143.69	1219.6	955.258	1076.74	979.034	987.221	1189.22	-0.173033	0.302892	1.12743
Hdx	287.772	358.127	364.516	862.929	809.124	745.272	326.517	303.143	330.576	813.285	999.773	785.121	582.18	1.35361	2.42634e-49	0.39131
Adam5	14.2193	23.105	16.5689	15.5483	12.0048	8.21992	16.7671	39.5404	41.1749	29.7823	21.6027	20.1042	21.5531	-0.478988	0.439761	1.39377
Adam8	679.142	547.78	645.083	633.16	572.629	497.305	648.622	631.767	627.035	557.845	559.078	594.661	599.509	-0.144564	0.151182	1.1054
Adam9	2047.58	2266.21	2158.38	2049.78	2082.83	2060.46	2066.77	2127.27	2344.62	1887.74	2103.24	2079.2	2106.17	-0.0837209	0.207718	1.05975
Sall1	62.2941	55.837	55.2298	89.8344	115.246	76.7192	70.5983	79.0807	77.6441	279.495	236.766	223.262	118.501	1.3517	0.000116146	0.39183
Adamts10	9157.24	8159.9	9292.96	9584.64	9939.98	7860.98	9927.89	9798.98	10210.2	10303.5	8892.54	9580.17	9392.42	-0.00971858	0.956083	1.00676
Adamts12	1224.22	1016.62	1352.02	1551.37	1260.5	1346.7	1522.28	1236.3	2078.74	1591.06	1157.9	2849.5	1515.6	0.211186	0.621995	0.863827
Mmp9	6219.94	6287.44	5761.57	22745.4	13782.7	6006.02	4095.59	4734.3	4509.24	17730.8	11287.8	8923.08	9340.32	1.34828	3.85907e-05	0.392759
Adamts15	495.645	584.363	747.811	423.258	632.653	608.274	475.656	632.646	910.554	642.61	836.457	743.855	644.482	0.0168333	0.969573	0.9884
Adamts16	19.6362	15.4033	16.5689	26.7776	34.8139	19.1798	22.9445	14.9375	22.3521	22.9094	19.0104	26.4529	21.7489	0.414028	0.296333	0.750525
Adamts17	2206.7	2014.94	2178.26	1696.49	1848.74	2202.94	2589.19	2954.98	3116.35	1947.3	1981.4	3177.52	2326.24	-0.228482	0.309045	1.1716
Col6a6	132.714	133.816	238.593	412.893	436.975	369.896	217.972	171.342	161.17	517.753	394.897	541.755	310.815	1.34417	3.63621e-15	0.39388
Adamts19	466.529	428.404	394.34	429.305	451.381	565.804	459.772	445.488	418.808	619.7	564.263	471.919	476.309	0.244195	0.0608423	0.844287
Glt1d1	43.3351	24.0677	38.6608	119.203	109.244	68.4993	51.1838	21.9669	25.8814	75.6011	82.0903	65.6031	60.4447	1.33777	3.61138e-06	0.39563
Adamts20	2623.8	2227.7	2862.01	1661.07	1636.26	2734.49	2052.65	2146.6	2141.1	1680.41	1657.36	2320.45	2145.32	-0.266357	0.16979	1.20277
Gm19203	14.8964	32.732	15.4643	50.1	38.4154	43.8395	51.1838	36.9043	35.2928	106.529	133.937	96.2885	54.6319	1.33615	0.00410474	0.396077
Gm3194	53.4917	15.4033	83.9492	146.845	105.642	124.669	60.0086	14.0588	70.5856	142.038	139.121	87.8235	86.9697	1.33219	0.0026362	0.397165
Ly6a	12.188	13.4779	15.4643	31.0965	31.2125	46.5795	8.82479	16.6948	17.6464	27.4913	31.972	41.2665	24.4929	1.32265	1.40072e-05	0.399799
Adamts6	201.102	172.324	204.35	234.088	258.103	220.568	299.161	285.569	458.806	404.352	327.497	412.665	289.882	0.198366	0.635185	0.871537
Gm14435	62.2941	146.331	57.4389	200.4	230.492	134.259	72.3633	93.1395	76.4677	161.512	367.246	170.356	147.692	1.31848	2.1713e-05	0.400958
Adamts8	64.3255	74.1284	97.2044	115.748	106.843	97.269	37.0641	39.5404	47.057	81.3285	63.0799	68.7775	74.3638	0.570868	0.102835	0.673212
Adamts9	2773.44	3104.73	3112.75	2663.94	2632.65	2883.82	2763.04	3102.6	4063.38	2006.87	1994.36	3327.77	2869.11	-0.286654	0.10389	1.21981
Cass4	19.6362	16.366	15.4643	35.4155	54.0216	41.0996	15.8846	16.6948	12.9407	41.237	38.0208	34.9178	28.4749	1.3097	6.74772e-07	0.403406
Scn8a	288.449	203.131	218.71	535.551	672.269	712.393	365.346	303.143	356.457	827.031	778.561	776.656	503.141	1.30944	1.13515e-15	0.403478
Adamtsl3	319.596	625.759	851.643	727.313	774.31	675.403	196.793	180.128	187.052	113.402	121.839	224.32	416.463	0.159284	0.908217	0.895469
Adamtsl4	58.9086	51.9861	62.9619	58.7379	63.6255	69.8693	56.4787	61.5072	76.4677	51.5462	57.8952	78.3005	62.3571	0.0476474	0.895512	0.967513
Adamtsl5	277.615	213.721	298.241	223.722	241.297	235.638	245.329	289.084	247.049	235.967	197.017	258.18	246.905	-0.178749	0.240306	1.1319
Adap1	161.829	67.3894	88.3676	82.0603	118.848	78.0892	95.3078	83.4741	72.9384	63.0009	57.8952	64.545	86.1454	-0.304449	0.439761	1.23495
Adap2	27.7615	16.366	23.1965	22.4586	31.2125	26.0297	26.4744	12.3014	30.5871	38.946	23.3309	31.7434	25.8673	0.340945	0.444257	0.789524
Adar	3493.21	3268.39	3370.12	3554.51	3668.67	3570.18	3461.08	3403.11	3293.99	3687.27	3301.76	3385.97	3454.86	0.0597524	0.29047	0.959429
Adarb1	1569.54	1522.04	1513.3	1270.64	1308.52	1411.09	1218.7	1247.72	1309.36	1095.07	1018.78	1156.52	1303.44	-0.208347	0.10389	1.15536
Htr7	63.6484	30.8066	33.1379	109.702	130.852	45.2095	21.1795	13.1801	9.41141	63.0009	44.0695	34.9178	49.9263	1.30891	0.0214981	0.403625
Adat1	1008.22	1006.99	972.044	979.541	1066.03	1054.89	1023.68	977.965	1058.78	1061.85	1088.78	959.71	1021.54	0.0380275	0.658996	0.973986
Trpm6	13.5422	14.4406	16.5689	26.7776	40.8164	31.5097	16.7671	10.5441	21.1757	44.6734	39.749	42.3246	26.5741	1.29651	8.93057e-06	0.40711
Adat3	3799.94	3100.88	3330.35	3811.05	3861.95	3518.12	3670.23	3632.44	3617.51	3624.27	3304.35	3795.46	3588.88	0.0506947	0.626047	0.965471
Adck1	878.889	772.091	854.957	845.653	893.158	828.841	885.127	876.917	877.614	941.578	854.603	932.199	870.136	0.0407791	0.682838	0.97213
Adck2	1019.05	967.52	990.822	1067.65	1134.45	1064.48	1028.09	1004.33	1163.49	1100.8	1057.67	1130.07	1060.7	0.0876019	0.25211	0.941086
Adck5	1575.64	1332.39	1405.04	1479.68	1563.03	1517.94	1606.11	1565.8	1694.05	1633.44	1452.57	1624.21	1537.49	0.0137058	0.927325	0.990545
Adcy1	799.667	582.437	596.481	697.081	775.511	675.403	739.518	647.583	676.445	907.214	842.505	962.885	741.894	0.26494	0.0635674	0.832233
Adcy10	11.5109	17.3287	11.046	16.4121	6.0024	21.9198	14.1197	18.4522	19.9992	12.6002	15.5539	24.3366	15.7735	0.0745449	0.927325	0.949642
Adcy2	1598.66	1691.48	1385.16	1579.88	1900.36	1709.74	1785.26	1850.49	1912.87	2104.23	2062.63	2047.45	1802.35	0.157754	0.242624	0.89642
Adcy3	2526.3	2281.61	2568.18	2836.69	2847.54	2441.31	2445.35	2447.99	2532.85	2633.44	2518.01	2797.66	2573.08	0.119562	0.0799856	0.920467
Adcy4	981.133	1010.84	1149.88	1123.79	1195.68	889.121	1059.86	1086.04	1155.25	1161.51	1020.51	1260.21	1091.15	0.0476185	0.764884	0.967532
Adcy5	768.52	858.734	808.564	993.361	968.788	835.691	1389.02	1229.27	1389.36	1642.61	1557.99	1872.86	1192.9	0.28933	0.382069	0.818282
Adcy6	7924.9	7411.88	8270.1	7756.86	7974.79	6825.27	8066.74	8212.09	8427.92	7963.32	7317.27	7891.42	7836.88	-0.0790225	0.270077	1.0563
Ctse	11.5109	16.366	14.3597	45.781	38.4154	41.0996	11.4722	14.0588	23.5285	26.3458	34.5643	32.8016	25.8587	1.29132	2.06081e-05	0.408576
Gjb2	153.704	113.599	164.585	393.026	444.178	431.546	107.662	136.195	94.1141	229.094	195.288	193.635	221.386	1.2902	1.96724e-06	0.408896
D830030K20Rik	5.41688	18.2914	6.62757	39.7345	26.4106	32.8797	14.1197	18.4522	8.23498	27.4913	31.972	14.8136	20.3704	1.28686	0.00485784	0.409843
Adcyap1r1	87.3472	16.366	22.0919	28.5052	61.2245	27.3997	29.1218	18.4522	15.2935	22.9094	32.8361	26.4529	32.3334	0.0617636	0.955688	0.958092
Add1	12248.2	11971.3	12637.7	11882.3	12683.1	12834	13322.8	13738.1	13647.7	13170.6	12684.2	13676.1	12874.7	-0.0118742	0.913172	1.00826
Add2	892.431	539.116	479.394	484.588	590.637	386.336	505.661	426.157	437.63	347.078	405.267	401.026	491.277	-0.328924	0.211883	1.25608
Add3	3876.46	4928.09	4536.57	4677.44	4416.57	4837.42	4188.25	4565.59	4464.54	4745.69	4809.63	4721.31	4563.96	0.0874239	0.289869	0.941202
Kbtbd13	23.6989	20.2168	24.3011	67.3758	51.6207	54.7994	23.8269	14.9375	21.1757	49.2553	52.7106	35.9759	36.6579	1.28597	3.2048e-07	0.410095
Adgra3	18181.1	18270.2	18225.8	17002.9	17583.4	18096.1	17008	17857.3	17258.2	16567	16391.3	15432.6	17322.8	-0.0797213	0.179307	1.05681
Gm10240	1190.36	895.317	402.073	3803.28	2130.85	3049.59	1999.7	1237.17	1549.35	2939.28	2457.52	3314.02	2080.71	1.28241	0.000649388	0.411109
Adgrb2	3344.25	2568.5	3327.04	3527.73	3837.94	2952.32	4053.23	3535.79	3452.81	4359.67	3414.09	4838.76	3601.01	0.177112	0.338491	0.884472
Adgrb3	299.283	307.103	294.927	334.288	363.746	400.036	373.289	385.738	402.338	461.625	527.106	512.128	388.467	0.335165	0.0570499	0.792693
Adgrd1	60.9399	119.376	60.7527	73.4224	108.043	41.0996	42.359	165.191	104.702	12.6002	15.5539	156.601	80.0534	-0.441815	0.628273	1.35831
Gm13370	1190.36	895.317	402.073	3803.28	2130.85	3049.59	1999.7	1237.17	1549.35	2939.28	2457.52	3314.02	2080.71	1.28241	0.000649388	0.411109
Adgre5	1721.89	1972.59	1880.02	2534.37	2061.23	1449.45	1470.21	1620.28	1662.29	2075.59	1744.63	1665.47	1821.5	0.159775	0.395534	0.895165
Adgrf5	1480.16	1735.76	1775.08	1502.14	1440.58	1482.32	1342.25	1567.56	1607	1305.84	1511.32	1626.32	1531.36	-0.0990688	0.401326	1.07108
Adgrg1	2032.69	1456.57	1720.96	1560.87	1423.77	1915.24	1892.92	2086.85	1759.93	1639.17	1475.9	1751.18	1726.34	-0.166369	0.233823	1.12223
Gpr25	45.3664	19.2541	36.4516	136.479	122.449	56.1694	36.1817	38.6617	12.9407	68.7283	25.9232	51.8476	54.2044	1.28151	0.00917881	0.411365
Adgrg3	117.14	168.474	141.388	167.576	147.659	154.808	161.494	159.919	181.17	182.13	155.539	189.403	160.558	0.108389	0.619788	0.927623
Adgrg5	7.44821	12.5152	12.1505	15.5483	15.6063	19.1798	15.0021	10.5441	9.41141	12.6002	23.3309	14.8136	14.0126	0.606317	0.189131	0.656871
Lrp1b	34.5326	47.1726	38.6608	81.1965	76.8308	39.7296	88.2479	32.511	47.057	182.13	162.452	156.601	82.2602	1.28097	0.00301052	0.411518
Adgrl1	25009.7	22131.7	22503.9	24279.5	26613.5	23403.5	25448.1	23905.2	23601.5	26683.8	24009.2	25138.7	24394	0.0741107	0.31715	0.949927
Scube2	38.5953	33.6947	41.9746	87.243	60.024	83.5691	39.7116	33.3896	23.5285	74.4557	96.7801	110.044	60.2509	1.27702	3.40524e-09	0.412648
Cmah	2196.55	2318.2	2219.13	5364.15	4390.16	5281.3	1644.94	1506.93	1791.7	4475.36	4755.19	3751.02	3307.88	1.26258	2.27777e-24	0.416797
Adgrl4	278.969	347.537	283.881	235.815	241.297	273.997	266.509	331.26	256.461	213.058	303.302	287.807	276.658	-0.18185	0.28403	1.13434
Adgrv1	81.9303	107.823	66.2757	88.1068	102.041	100.009	109.427	89.6248	88.2319	92.7832	103.693	129.09	96.5864	0.1777	0.480994	0.884111
Dmrt2	389.338	270.52	217.605	230.633	638.656	683.623	518.898	491.179	298.812	1576.17	1469.85	609.474	616.23	1.2519	0.0199469	0.419895
Tmem215	14.8964	19.2541	17.6735	45.781	38.4154	43.8395	8.82479	21.0882	36.4692	46.9643	47.5259	52.9057	32.8032	1.24904	0.000108427	0.420727
Adh7	18.9591	28.8812	25.4057	21.5948	15.6063	26.0297	20.297	24.6029	21.1757	18.3275	19.0104	15.8717	21.3135	-0.256884	0.552941	1.19489
Adhfe1	12.188	13.4779	7.73217	11.2293	16.8067	9.5899	14.1197	11.4228	16.47	10.3092	7.77697	10.5811	11.8086	-0.194428	0.770382	1.14427
Adi1	1392.14	1516.26	1424.93	1563.46	1350.54	1719.33	1324.6	1450.69	1470.53	1432.99	1615.02	1360.74	1468.44	0.0762193	0.489186	0.94854
Rpl13-ps6	15.5735	39.471	11.046	72.5586	39.6159	41.0996	7.05983	33.3896	28.2342	60.71	43.2054	61.3707	37.7779	1.24859	0.0059347	0.420858
Adipor2	4871.81	4940.61	4703.37	4840.69	4756.31	4359.3	4594.19	4743.97	4771.58	4477.65	4820.86	4240.92	4676.77	-0.0575304	0.379122	1.04068
Adk	2799.17	3185.6	2429	2806.46	2809.13	2609.82	2291.8	2682.59	2355.2	2371.13	2689.97	2499.27	2627.43	0.00365571	0.985425	0.997469
Adm	46.7206	56.7997	27.6149	43.1896	37.2149	38.3596	61.7736	49.2058	41.1749	46.9643	39.749	49.7314	44.8749	-0.157055	0.680476	1.11501
Adnp	4380.23	2917.96	5136.37	3745.4	4404.56	5079.91	5143.09	4601.62	4401.01	4610.52	4517.56	5792.12	4560.86	0.0826714	0.731179	0.944307
Adnp2	2119.36	2140.1	2120.82	1930.58	2037.22	2181.02	2097.65	2071.04	2222.27	1857.96	2006.46	2087.66	2072.68	-0.0784426	0.20866	1.05588
Ado	3819.58	4129.05	3573.36	4109.92	3599.04	3724.99	3183.1	3482.19	3049.3	3455.89	3704.43	3119.32	3579.18	0.0319443	0.855971	0.978101
Cd5	24.376	22.1422	23.1965	46.6448	68.4274	56.1694	30.0043	20.2095	27.0578	74.4557	65.6722	37.034	41.2825	1.24303	1.32117e-06	0.422485
Adora2a	258.656	192.541	265.103	242.726	190.876	231.528	277.099	271.511	243.52	262.313	253.184	287.807	248.072	-0.0376713	0.884215	1.02646
Adora2b	530.854	550.668	540.147	627.977	483.794	368.526	572.729	598.378	450.571	534.935	418.228	375.631	504.37	-0.206249	0.288109	1.15368
Adora3	28.4386	23.105	17.6735	21.5948	19.2077	30.1397	21.1795	23.7242	21.1757	27.4913	32.8361	20.1042	23.8892	0.148433	0.757005	0.90223
Pde9a	326.367	323.469	291.613	731.632	735.895	838.431	286.806	294.356	304.694	703.32	637.712	692.007	513.859	1.24301	1.27716e-55	0.422489
Adprh	4032.19	3411.83	3840.68	3935.44	4091.24	3946.93	4113.24	3972.49	3946.91	4037.79	3669	4489.58	3957.28	0.0513962	0.61167	0.965002
Adprhl2	2866.88	2357.67	2758.17	2834.97	2985.6	2590.64	2947.48	2833.73	2669.31	2846.5	2578.5	2760.62	2752.51	0.0138027	0.922348	0.990478
Adprm	601.951	654.64	682.64	626.25	623.05	645.263	684.804	678.337	656.446	651.773	700.792	583.021	649.081	-0.0449319	0.683743	1.03163
Adra1b	19.6362	20.2168	30.9287	38.0069	44.4178	28.7697	23.8269	48.3271	57.6449	37.8006	16.4181	53.9639	34.9965	0.13649	0.85565	0.90973
Kcns1	100.889	103.972	132.551	272.958	312.125	156.178	120.017	142.345	119.995	347.078	288.612	320.609	201.444	1.2419	3.74835e-11	0.422814
Adra2a	75.8364	98.1961	236.383	103.655	140.456	76.7192	246.212	167.827	321.164	106.529	133.937	260.296	163.934	-0.476196	0.372669	1.39107
Adra2b	28.4386	31.7693	24.3011	16.4121	6.0024	10.9599	13.2372	16.6948	21.1757	25.2004	25.0591	29.6272	20.7398	-0.247916	0.723346	1.18749
Adra2c	13.5422	4.81353	13.2551	13.8207	18.0072	12.3299	18.5321	40.419	39.9985	61.8555	18.1463	33.8597	24.0483	0.278489	0.788409	0.824454
Adrb1	25.7302	30.8066	45.2884	63.0569	44.4178	35.6196	24.7094	36.9043	27.0578	37.8006	24.195	38.0921	36.1399	0.36227	0.377834	0.777939
Gm14226	30.47	27.9185	36.4516	64.7844	68.4274	86.3091	40.5941	25.4816	36.4692	83.6194	82.0903	79.3586	55.1645	1.23933	1.55896e-10	0.423569
Adrb3	12.188	16.366	8.83676	6.04655	8.40337	15.0698	15.0021	15.8161	10.5878	14.8911	12.0975	6.34869	11.8045	-0.354744	0.575468	1.27876
Adrm1	4584.04	3752.63	4104.68	4587.6	4494.6	4448.34	4507.7	4543.63	4061.02	4867.11	3918.73	4944.57	4401.22	0.0927339	0.379627	0.937744
Adsl	3715.3	3106.65	3378.96	3823.15	3547.42	3442.77	3459.32	3341.6	3138.7	3547.53	3477.17	3261.11	3436.64	0.066623	0.439417	0.954871
Zfp993	163.184	124.189	149.12	247.908	322.929	321.947	99.7202	88.7462	92.9377	263.458	292.069	250.773	201.415	1.23694	1.52335e-12	0.424273
Adssl1	56.2002	60.6505	68.4849	95.881	75.6303	53.4295	73.2458	86.9888	76.4677	88.2013	80.362	110.044	77.1322	0.266138	0.343392	0.831543
Aebp1	4838.63	4305.22	4485.76	4338.83	4399.76	4100.37	4857.17	4926.73	5233.92	4325.3	3846.14	5810.11	4622.33	-0.0950617	0.52515	1.06811
6430531B16Rik	31.1471	26.9558	34.2424	55.2827	67.2269	71.2393	21.1795	23.7242	28.2342	68.7283	62.2158	64.545	46.2268	1.23029	1.18855e-09	0.426233
Aen	3307.68	3001.72	2821.14	3379.16	3098.44	2594.75	2993.37	2886.45	2609.31	3121.41	2762.55	2373.35	2912.44	-0.0241381	0.901575	1.01687
Aes	11073.5	8137.76	10068.4	11204.3	10862	9884.45	12989.2	11544	11304.3	12594.5	9936.38	12552.4	11012.6	0.041824	0.843869	0.971426
Afap1	2738.23	2564.65	2593.59	2758.09	2893.16	2702.98	2509.77	2641.3	2963.42	2639.17	2659.72	3033.62	2724.81	0.0599613	0.485507	0.95929
Gjb6	37.9182	49.098	59.6481	98.4723	150.06	128.779	28.2393	46.5698	32.9399	65.2919	89.0031	63.4869	70.7922	1.22521	3.89226e-05	0.427735
Tmem178	75.1592	54.8743	57.4389	124.386	127.251	102.749	45.8889	64.1433	68.2327	182.13	163.316	154.485	101.671	1.22386	1.60995e-10	0.428137
Afdn	5397.92	5236.16	5213.69	4661.02	4493.4	5560.77	4768.04	4700.91	4649.24	4413.5	4451.02	4742.47	4857.35	-0.0820273	0.427246	1.0585
Aff1	1035.3	998.327	1063.73	966.584	1007.2	1059	1231.06	1254.75	1279.95	1101.94	1088.78	1191.44	1106.5	-0.0969493	0.449954	1.06951
Aff2	674.402	301.327	680.431	783.46	561.825	886.381	673.332	391.889	643.505	799.539	484.765	1114.19	666.254	0.460241	0.137885	0.726865
Aff3	3507.43	3407.02	3775.51	3055.23	3304.92	3700.33	3514.92	3663.2	4009.26	3752.57	3412.36	4042	3595.4	-0.0408373	0.75758	1.02871
Aff4	10207.4	9184.22	10720.1	8554.14	7581.04	10550.3	9869.65	8096.99	10413.7	9026.32	8414.68	10028.8	9387.28	-0.111203	0.424397	1.08013
Gm4366	9879.72	10170	10293.7	24046.3	20788.7	23040.4	8147.93	9018.72	8311.45	20790.3	20152.7	21290.3	15494.2	1.22078	5.14635e-62	0.429052
Afg3l2	3781.66	3874.89	3538.02	3909.52	4020.41	3441.4	3649.93	3823.99	3553.98	3892.31	3834.05	3482.26	3733.54	0.0230571	0.816038	0.984145
Gm4353	471.946	578.587	573.285	1142.8	1171.67	1256.28	449.182	444.609	464.688	1091.63	1200.25	1048.59	824.459	1.21393	1.02883e-45	0.431092
Trim34a	29.7929	51.9861	43.0792	94.1534	100.84	93.159	65.3035	32.511	72.9384	108.82	152.083	128.032	81.0582	1.21011	6.59353e-06	0.432236
Aftph	1935.18	2100.63	1936.36	1683.53	1581.03	1978.26	1775.55	1877.73	1883.46	1666.66	1868.2	1630.56	1826.43	-0.145363	0.0914075	1.10601
Olfr1438-ps1	16.9278	33.6947	29.8241	83.7879	92.437	67.1293	30.0043	36.0257	54.1156	63.0009	60.4876	89.9398	54.7812	1.20712	1.95176e-05	0.433131
Agap1	7210.55	6891.05	7042.9	6291.86	6372.15	7436.28	6503.87	6408.18	5773.9	5781.2	6162.82	6275.68	6512.54	-0.056266	0.642892	1.03977
Agap2	5678.92	4410.16	4744.24	4846.74	4824.73	4225.04	5068.96	4472.45	2356.38	4437.56	4051.8	3774.3	4407.61	-0.0314274	0.931441	1.02202
Agap3	6597.09	4918.47	5933.88	5853.06	6475.39	6229.33	6539.17	6025.07	5640.96	6690.7	5411.04	6420.64	6061.23	0.0560776	0.684976	0.961876
Agbl2	116.463	154.996	186.677	115.748	110.444	142.479	129.724	146.739	244.697	135.166	126.16	124.858	144.512	-0.369437	0.123009	1.29185
Agbl3	302.668	354.276	410.909	312.693	289.316	316.467	342.402	316.323	430.572	321.878	343.051	335.422	339.665	-0.161884	0.272869	1.11875
Agbl4	13.5422	11.5525	13.2551	15.5483	10.8043	13.6999	20.297	14.0588	15.2935	18.3275	8.64108	11.6393	13.8883	-0.169032	0.790963	1.1243
Agbl5	2931.89	2520.37	2923.86	2860.02	3013.21	3149.6	3423.14	3030.55	3361.05	3390.6	3081.41	3557.38	3103.59	0.0667172	0.631045	0.954808
Ager	442.83	450.547	476.08	423.258	474.19	427.436	549.785	537.749	472.923	522.335	464.026	536.464	481.469	-0.0413401	0.813679	1.02907
Agfg1	5217.81	5587.55	5173.92	5457.44	5054.02	5962.18	4825.4	4678.06	4698.65	5095.06	5144.04	5197.46	5174.3	0.0799952	0.374427	0.946061
Rbm46	29.1157	40.4337	32.0333	57.0103	61.2245	83.5691	45.8889	22.8455	31.7635	80.183	103.693	78.3005	55.5051	1.20211	1.21302e-06	0.434638
Aggf1	3193.93	3181.74	3230.94	3192.58	3208.89	3155.08	2947.48	3101.72	2912.83	3136.3	3262.87	2796.6	3110.08	0.0140567	0.894047	0.990304
Agk	1558.03	1713.62	1540.91	1651.57	1633.85	1537.12	1531.1	1557.89	1535.24	1518.9	1524.29	1619.97	1576.87	0.00781699	0.94077	0.994596
Agl	3350.34	3474.41	3520.34	3597.7	3373.35	3274.27	3239.58	3119.3	3357.52	3399.76	3391.62	3256.88	3362.92	0.0177233	0.832404	0.98779
Agmo	30.47	36.5828	43.0792	33.6879	21.6087	26.0297	36.1817	37.783	34.1164	21.764	33.7002	24.3366	31.6117	-0.412605	0.181002	1.33109
Ago1	9122.03	8826.09	9062.1	8195.66	8428.58	9167.95	9038.35	9076.71	9613.75	9443.27	9137.94	8460.69	8964.43	-0.0511812	0.454007	1.03611
Ago2	10020.6	8955.09	10387.6	10226.4	9503.01	12086	9584.61	8444.94	10145.5	10311.5	9252.87	11592.7	10042.6	0.130102	0.241169	0.913767
Ago3	1767.93	1881.13	2078.85	2077.42	1887.16	1912.5	1917.63	1586.89	2194.03	2042.38	1894.12	2067.56	1942.3	0.0577798	0.662534	0.960742
Ago4	830.137	765.352	828.446	762.729	794.718	842.541	980.435	920.851	1018.78	849.94	979.899	906.804	873.386	-0.0558029	0.729389	1.03944
Agpat1	3610.35	3112.43	3414.3	3714.31	3468.19	3494.83	3620.81	3516.46	3526.93	3641.45	3055.49	3560.56	3478.01	0.00877161	0.947515	0.993938
Agpat2	534.917	498.682	562.239	555.419	551.021	524.705	561.257	571.139	584.684	554.408	546.116	595.719	553.359	0.00909131	0.948873	0.993718
Agpat3	3724.11	3633.25	4151.07	3742.81	3853.54	3849.66	3853.79	3747.55	3802.21	3751.42	3532.47	3553.15	3766.25	-0.0403142	0.569664	1.02834
Acta2	749.561	676.783	614.155	1602.34	1663.87	1985.11	594.791	576.411	505.863	1130.58	1102.6	1071.87	1022.83	1.20095	9.83663e-13	0.434989
Agpat5	2269.67	2431.8	2097.63	2308.05	2300.12	2324.87	2015.58	2004.26	1971.69	1986.25	2285.57	1982.91	2164.87	0.0436968	0.733933	0.970166
Agps	3783.02	4247.46	4028.46	3740.22	3584.64	3975.7	3825.55	3715.04	4129.26	3927.82	4028.47	3974.28	3913.33	-0.029914	0.730305	1.02095
Agrn	37218	31647	34613.6	31410.1	33719.1	36540.3	39766.3	38169.6	34924.6	37775.4	33636.3	40597.8	35834.8	-0.0179175	0.912541	1.0125
Agrp	15.5735	10.5898	18.7781	18.1396	21.6087	26.0297	18.5321	14.0588	25.8814	17.1821	14.6898	24.3366	18.7834	0.23982	0.648454	0.846851
Agt	6.09399	7.70165	15.4643	1.72758	8.40337	20.5498	13.2372	32.511	45.8806	4.58189	5.18465	55.022	18.0298	-0.339301	0.818947	1.26514
Agtpbp1	1587.15	1552.85	1695.55	1670.57	1654.26	1756.32	1442.85	1345.25	1376.42	1439.86	1625.39	1699.33	1570.48	0.129251	0.185201	0.914306
Agtr1a	67.711	73.1657	66.2757	66.512	52.8212	56.1694	49.4188	65.0219	55.292	56.1281	44.0695	58.1963	59.2318	-0.17719	0.524343	1.13068
Myh11	77.8677	77.9792	93.8906	111.429	129.652	120.559	90.0129	112.47	111.76	360.824	317.992	252.889	154.777	1.20017	0.000440442	0.435225
Apobec1	67.0339	93.3825	60.7527	114.021	157.263	167.138	59.1261	72.93	71.762	190.148	230.717	115.335	116.634	1.19814	5.41161e-08	0.435837
Ahctf1	6255.14	5503.79	6324.91	5527.41	5084.04	7106.12	5664.63	4827.44	5405.68	5335.61	5337.6	5985.76	5696.51	0.0163658	0.937838	0.98872
Olfr1372-ps1	710.966	880.876	677.117	1750.04	1715.49	1743.99	758.05	669.55	911.73	1712.48	1796.48	1833.71	1263.37	1.19727	2.17714e-48	0.436101
Ahcyl1	9649.5	10792.9	10103.7	9810.09	9785.12	10053	9289.86	9757.68	9776.1	8872.82	10269.9	9237.34	9783.17	-0.0328134	0.710914	1.02301
Sh2d5	48.0748	49.098	66.2757	126.114	139.256	73.9792	61.7736	43.0551	42.3513	134.02	134.801	99.4628	84.8551	1.1945	1.33186e-08	0.436937
Ahdc1	4077.56	3457.08	4128.98	4160.89	4244.9	4678.5	4316.21	4072.66	3875.15	4680.4	3595.55	5078.95	4197.23	0.143529	0.220297	0.905302
Ahi1	1305.47	1261.15	1130	1376.02	1390.16	1363.14	1291.95	1252.11	1162.31	1271.47	1313.44	1339.57	1288.07	0.118814	0.0671513	0.920944
En1	111.046	138.63	143.597	317.876	436.975	168.508	99.7202	174.856	101.173	303.55	183.191	349.178	210.692	1.19388	5.09831e-06	0.437126
Ahnak2	180.788	157.884	192.2	177.077	202.881	267.147	156.199	175.735	158.818	180.985	161.588	221.146	186.037	0.236985	0.19874	0.848516
Hrh3	47.3977	45.2472	23.1965	101.928	79.2317	69.8693	43.2415	35.147	17.6464	92.7832	82.0903	62.4288	58.3506	1.18811	1.32643e-05	0.438879
Ahrr	186.205	242.602	231.965	220.267	262.905	221.938	212.678	260.966	254.108	237.113	289.476	316.376	244.717	0.16221	0.394592	0.893655
Ahsa1	6159	5756.98	5708.55	6401.57	6277.31	5470.35	5581.68	5575.19	5271.56	5762.87	5915.68	5214.39	5757.93	0.0412641	0.695	0.971803
Ahsa2	4542.06	5950.49	4208.51	5140.43	5090.04	3898.98	4106.18	4821.29	4243.37	4597.92	5779.15	3784.88	4680.27	0.0217769	0.936563	0.985019
Aida	3644.88	4159.85	3992.01	3755.77	3577.43	3698.96	3404.61	3730.85	3619.86	3315	3719.12	3407.13	3668.79	-0.0702576	0.427246	1.0499
Aif1	80.5761	88.569	79.5308	79.4689	84.0337	61.6494	82.9531	79.0807	95.2905	87.0559	91.5955	77.2424	82.2538	-0.0602584	0.827252	1.04265
Gm14584	146.256	218.534	206.559	399.936	381.753	406.886	155.316	183.643	134.113	380.297	419.957	362.933	283.015	1.17351	4.86991e-21	0.443343
Aifm1	3252.16	3201.96	2774.74	3333.38	3240.1	2963.28	2836.29	2787.16	2783.42	2914.08	3106.47	2668.57	2988.47	0.0472541	0.697707	0.967777
Aifm2	419.131	450.547	452.884	471.631	459.784	408.256	486.246	513.146	587.037	494.844	495.998	551.278	482.565	-0.00906104	0.969695	1.0063
Aifm3	48.7519	36.5828	53.0206	47.5086	52.8212	35.6196	60.8911	71.1727	74.1148	63.0009	38.0208	49.7314	52.603	-0.261587	0.454554	1.1988
Aig1	358.191	329.246	384.399	292.826	319.328	310.987	341.52	340.926	351.751	379.151	332.682	325.899	338.909	-0.103311	0.394434	1.07424
Aim1	782.739	843.331	875.944	735.087	624.25	841.171	671.567	697.668	597.624	518.899	515.008	497.314	683.384	-0.261468	0.196542	1.1987
Aim1l	241.051	225.273	263.998	196.081	229.292	339.757	276.216	287.327	176.464	306.986	294.661	235.96	256.089	0.119703	0.664396	0.920377
Aim2	84.6388	90.4944	104.937	77.7413	76.8308	61.6494	85.6005	72.0513	105.878	95.0742	83.8185	68.7775	83.9576	-0.21565	0.3519	1.16123
B3gnt7	109.692	95.3079	91.6814	277.277	244.898	234.268	124.43	118.621	103.525	239.404	188.376	259.238	173.893	1.16066	7.68453e-19	0.447307
Aimp2	1807.21	1487.38	1395.1	1761.27	1786.32	1613.84	1486.1	1491.99	1269.36	1727.37	1509.6	1567.07	1575.22	0.155225	0.170718	0.897992
Aip	2301.5	1922.52	2264.42	2261.41	2272.51	2186.5	2403.87	2286.31	2258.74	2297.82	1930.42	2444.25	2235.86	-0.00536468	0.973825	1.00373
Aipl1	250.531	186.765	212.082	215.084	214.886	230.158	172.966	180.128	152.935	176.403	193.56	152.369	194.822	0.0272974	0.934445	0.981257
Aire	29.1157	27.9185	36.4516	23.3224	28.8115	39.7296	31.7693	22.8455	27.0578	32.0732	24.195	47.6152	30.9088	0.149916	0.745852	0.901303
Utp14b	624.973	602.654	511.428	1425.26	1219.69	1067.22	493.306	527.205	534.097	1342.49	1310.85	958.652	884.819	1.15277	1.3018e-26	0.449762
Ajuba	5630.17	5212.09	5520.77	4439.89	4926.77	5879.98	5848.19	5946.87	5610.38	5430.68	4985.04	4803.84	5352.89	-0.149146	0.0874555	1.10891
Ak1	614.816	647.901	666.071	615.884	578.632	480.865	730.693	778.506	956.434	641.464	627.342	1009.44	695.671	-0.150893	0.581943	1.11026
Cd59b	723.154	796.158	583.226	1642.93	1409.36	1319.3	570.082	591.348	474.1	1343.64	1610.7	981.931	1003.83	1.15142	8.86195e-15	0.450182
Ak3	2671.88	3277.05	3037.64	3012.91	2824.73	2897.52	2608.61	2935.65	3172.82	2809.84	3168.68	2877.01	2941.2	-0.00796175	0.959591	1.00553
Ak4	2990.12	2985.35	2387.03	3130.38	2825.93	2956.43	2448.88	2202.84	1838.75	2638.02	2562.08	2118.35	2590.35	0.127476	0.528516	0.915432
Gm7153	12.188	5.77624	12.1505	28.5052	19.2077	31.5097	11.4722	8.78675	21.1757	32.0732	24.195	21.1623	19.0169	1.14812	0.00298118	0.451214
Ak6	4482.47	4997.41	4341.06	4286.14	4262.91	4452.45	4139.71	4255.42	3957.5	3999.99	4405.22	3487.55	4255.65	-0.0725007	0.541825	1.05154
Ak8	14.2193	7.70165	14.3597	14.6845	9.60385	17.8098	18.5321	12.3014	10.5878	17.1821	17.2822	19.0461	14.4425	0.290975	0.603164	0.817349
Ak9	14.8964	11.5525	17.6735	5.18275	14.4058	13.6999	10.5898	15.8161	18.8228	8.0183	5.18465	13.7555	12.4665	-0.597509	0.291937	1.5131
Pdlim3	44.6893	23.105	34.2424	130.433	85.2341	31.5097	51.1838	54.4778	39.9985	132.875	99.3724	68.7775	66.3248	1.14735	0.00250581	0.451454
Akap10	1544.49	1760.79	1797.18	1576.42	1475.39	1633.02	1489.63	1462.99	1615.23	1537.22	1557.12	1606.22	1587.98	-0.0420311	0.705769	1.02956
Akap11	5257.76	4646.02	5172.82	5346.01	4558.23	5755.31	4616.25	3959.31	4850.4	4817.85	4746.55	5273.64	4916.68	0.0974861	0.425148	0.93466
Akap12	2134.25	2788.96	3342.5	3336.83	3680.67	5370.34	3643.76	5820.34	8203.22	5877.42	6654.5	9354.79	5017.3	0.402431	0.510489	0.756582
Akap13	5703.98	5599.1	6472.93	6634.79	6270.11	7337.64	6121.76	5931.05	6890.33	6550.95	5939.88	7475.58	6410.68	0.131085	0.185865	0.913145
Akap17b	534.24	544.892	502.591	499.272	470.589	490.455	576.259	623.859	625.859	558.99	637.712	580.905	553.802	-0.0709531	0.662534	1.05041
Akap2	6723.71	7384.92	6257.53	6848.15	7253.31	7058.17	6344.14	6810.61	6904.44	6848.78	7679.33	7031.17	6928.69	0.0797213	0.258286	0.94624
Plscr4	72.4508	121.301	88.3676	102.791	228.091	282.217	121.782	96.6542	121.172	166.093	234.173	357.643	166.061	1.14143	9.87139e-05	0.45331
Akap6	186.205	141.518	163.48	110.565	151.261	123.299	210.03	239	328.223	164.948	194.424	206.332	184.94	-0.412689	0.168014	1.33116
Luzp2	20.3133	32.732	24.3011	29.3689	48.0192	38.3596	22.062	24.6029	15.2935	59.5645	74.3133	56.0801	37.0842	1.13543	0.000406229	0.455198
Akap8	9461.26	10501.2	9666.31	9945.71	10148.9	9343.3	9581.96	10024.8	9519.64	9831.58	11100.3	9259.56	9865.38	0.0215858	0.830868	0.985149
Akap8l	2659.01	2656.11	2973.57	2371.11	2638.66	2512.55	3140.74	2996.28	3597.51	2746.84	2594.05	2906.64	2816.09	-0.192189	0.0631299	1.1425
9330132A10Rik	24.376	40.4337	13.2551	53.5551	43.2173	39.7296	15.8846	14.9375	17.6464	42.3825	57.8952	41.2665	33.715	1.13511	0.000815572	0.455301
Akip1	438.767	369.679	381.085	384.388	357.743	328.797	390.938	400.676	409.396	358.533	397.49	392.561	384.171	-0.104539	0.349109	1.07515
Akirin1	2708.44	2828.43	2573.71	2949.85	2732.29	2696.13	2516.83	2716.86	2355.2	2808.7	3025.24	2440.01	2695.98	0.0850633	0.37225	0.942743
Akirin2	2227.69	2475.12	2374.88	2111.11	1955.58	2102.93	2302.39	2409.33	2123.45	2162.65	2389.26	2101.42	2227.98	-0.116914	0.125388	1.08441
Akna	1985.96	1663.56	2037.98	1878.75	1925.57	2005.66	2047.35	1957.69	1997.57	2169.52	1857.83	2043.22	1964.22	0.0226663	0.8611	0.984412
Aknad1	20.9904	24.0677	23.1965	44.0534	18.0072	20.5498	21.1795	31.6323	19.9992	35.5096	16.4181	15.8717	24.2896	0.0999811	0.887717	0.933045
Akr1a1	16744.9	15522.7	16624.2	17455.5	16928	16513.8	16970.1	17005	17242.9	17800.6	16284.1	16772.2	16822	0.023543	0.715916	0.983814
Akr1b10	159.798	187.728	170.108	198.672	208.884	171.248	182.673	188.915	181.17	177.548	216.891	174.589	184.852	0.108147	0.505126	0.927779
Akr1b3	3688.22	3303.05	3209.95	3976.04	3927.97	3538.67	3288.12	3623.65	3019.89	3619.69	3287.93	3487.55	3497.56	0.116517	0.202859	0.922412
Tbx15	390.016	736.47	964.311	1899.48	1298.92	424.696	435.062	282.055	242.344	955.323	697.335	1421.05	812.255	1.13497	0.0408024	0.455345
Akr1c13	26.4073	35.6201	40.87	34.5517	26.4106	46.5795	50.3013	55.3565	45.8806	42.3825	45.7977	42.3246	41.0402	-0.0899793	0.855831	1.06435
Gm14399	150.996	103.01	161.271	291.962	264.106	308.247	176.496	152.011	151.759	326.459	388.849	378.805	237.831	1.13026	2.16483e-14	0.456835
Akr1d1	12.8651	11.5525	7.73217	12.9569	9.60385	17.8098	16.7671	10.5441	18.8228	8.0183	13.8257	9.52303	12.5018	-0.126022	0.868261	1.09128
Lrrtm1	335.17	355.239	572.18	810.237	1190.88	705.543	436.827	283.812	251.755	978.233	634.255	569.266	593.616	1.12912	1.62919e-06	0.457194
Akr7a5	1487.61	1189.91	1666.83	1397.62	1318.13	1445.34	1701.42	1639.61	1557.59	1515.46	1076.68	1669.71	1472.16	-0.13448	0.43403	1.0977
Zfp708	90.7328	135.742	91.6814	171.031	210.084	97.269	33.5342	69.4153	103.525	239.404	269.602	155.543	138.964	1.12735	0.00124008	0.457756
Akt1s1	3252.84	2570.43	3213.27	3471.58	3421.37	3386.61	3550.21	3623.65	3651.63	3718.2	2790.2	3799.69	3370.81	0.0516158	0.776166	0.964855
Akt2	7648.64	7124.03	7972.97	7244.63	7360.15	7680.14	7592.85	8083.81	7766.76	7540.64	7234.31	7582.45	7569.28	-0.0493845	0.377434	1.03482
Akt3	3745.1	3821.94	3934.57	3563.14	3548.62	3616.76	3498.15	3176.41	3356.34	3647.18	4036.25	3541.51	3623.83	0.0282086	0.815483	0.980637
Aktip	1212.7	1315.06	1281.33	1243	1099.64	1201.48	1231.94	1236.3	1207.01	1143.18	1133.71	1054.94	1196.69	-0.121545	0.0665752	1.0879
Alad	2067.89	1531.67	1727.59	1948.72	1921.97	2000.18	2039.41	1989.32	1850.52	2325.31	1755	2469.64	1968.93	0.147646	0.309649	0.902722
Poli	402.204	452.472	392.131	906.982	945.979	960.36	444.77	444.609	494.099	1005.72	1036.07	879.293	697.057	1.12698	5.62804e-56	0.457874
Alas2	528.823	593.027	736.765	657.346	469.388	565.804	505.661	391.889	490.57	327.605	400.082	504.721	514.307	-0.149692	0.617416	1.10933
Alb	20.9904	26.9558	30.9287	69.9672	48.0192	27.3997	21.1795	27.2389	31.7635	13.7457	13.8257	10.5811	28.5496	0.215049	0.808623	0.861517
Alcam	8618.26	11073	11099	10003.6	10294.1	12235.3	13518.7	13801.3	15247.7	16918.6	17401.4	17025.1	13103	0.193416	0.463567	0.874533
Aldh16a1	3158.04	2706.17	2934.91	2727.86	3078.03	3327.7	3173.4	3094.69	2790.48	3082.46	2853.28	3670.6	3049.8	0.0685999	0.592807	0.953563
Aldh18a1	4414.08	4032.78	4650.35	4475.31	4333.74	4209.97	3969.39	4283.54	4263.37	4071.01	3757.14	4501.22	4246.82	-0.0150319	0.905796	1.01047
Dtx4	525.438	545.855	603.109	1450.31	1415.37	923.371	454.477	463.94	515.275	911.795	1015.33	1027.43	820.974	1.11879	1.04532e-15	0.46048
Aldh1a2	2241.91	3432.05	2412.44	1976.36	2157.26	2819.43	2961.6	5442.51	6727.98	3934.7	5325.5	5755.09	3765.57	-0.079737	0.924782	1.05683
Gm3383	67.0339	18.2914	104.937	146.845	105.642	136.999	79.4231	22.8455	74.1148	155.784	150.355	97.3466	96.6347	1.11661	0.00908331	0.461177
Aldh1a7	8.12532	9.62706	8.83676	8.63792	12.0048	21.9198	30.0043	23.7242	16.47	29.7823	25.9232	13.7555	17.4009	0.206241	0.818305	0.866793
Aldh1b1	111.046	66.4267	64.0665	73.4224	98.4394	31.5097	75.8932	61.5072	62.3506	68.7283	66.5363	32.8016	67.7273	-0.250501	0.605505	1.18962
Aldh1l1	54.1688	47.1726	46.393	46.6448	36.0144	39.7296	49.4188	50.9631	32.9399	30.9277	32.8361	30.6853	41.4912	-0.382764	0.169732	1.30384
Aldh1l2	461.112	520.824	664.966	387.843	426.171	443.875	364.464	426.157	375.28	280.641	338.73	409.49	424.963	-0.299123	0.171237	1.2304
St6galnac5	375.796	579.549	482.708	1058.15	1183.67	924.74	420.06	426.157	458.806	958.76	1014.46	786.179	722.42	1.11336	7.09543e-20	0.462218
Gm18609	41.3037	37.5455	51.916	94.1534	86.4346	68.4993	41.4765	32.511	38.8221	92.7832	86.4108	93.1141	63.7475	1.10904	3.19028e-10	0.463602
Aldh3a2	1314.95	1473.9	1450.33	1502.14	1543.82	1294.64	1335.19	1323.28	1395.24	1441	1557.12	1267.62	1408.27	0.0556045	0.621074	0.962191
Aldh3b1	32.5013	30.8066	37.5562	34.5517	46.8188	43.8395	25.5919	27.2389	45.8806	36.6551	41.4772	35.9759	36.5745	0.270593	0.408001	0.828979
Masp1	58.9086	105.898	153.539	219.403	273.71	260.297	52.9488	65.9006	63.527	99.656	113.198	112.16	131.596	1.10873	0.0053882	0.463702
Ttc6	20.9904	27.9185	26.5103	45.781	38.4154	41.0996	20.297	28.9963	19.9992	80.183	65.6722	39.1503	37.9178	1.10635	0.000212434	0.464467
Aldh5a1	1962.94	2303.76	2123.03	2062.74	2076.83	2378.3	2080	1994.59	2209.33	2018.32	2238.04	2222.04	2139.16	0.0366774	0.726233	0.974898
Aldh6a1	1284.48	1741.54	1578.47	1285.32	1266.51	1252.17	1418.14	1534.17	1771.7	1358.53	1562.31	1526.86	1465.02	-0.175008	0.168583	1.12897
Aldh7a1	3259.61	3133.61	3310.47	3518.23	3441.78	3379.76	3262.53	3283.61	3437.52	3500.56	3227.44	3320.36	3339.62	0.0507878	0.336903	0.965409
Aldh8a1	16.9278	48.1353	18.7781	19.8672	25.2101	45.2095	37.0641	36.0257	41.1749	26.3458	22.4668	21.1623	29.864	-0.315896	0.564617	1.24478
Aldh9a1	2316.39	2482.82	2526.21	2609.52	2608.64	2357.75	2404.76	2367.15	2371.67	2482.24	2432.46	2534.19	2457.82	0.0557829	0.348419	0.962072
Ccr5	55.523	61.6132	68.4849	123.522	127.251	120.559	82.0706	80.8381	76.4677	161.512	205.658	169.298	111.066	1.10298	1.02597e-08	0.465553
Aldoc	361.577	270.52	291.613	285.915	308.524	387.706	336.225	307.536	275.284	343.642	340.459	387.27	324.689	0.149439	0.357996	0.901601
Capza1	4734.36	4940.61	4360.94	10192.8	9873.96	10013.2	4562.42	4575.26	4537.47	9736.51	10518.8	8965.41	7250.97	1.09743	1.1149e-124	0.467349
Alg10b	2340.09	1316.02	2449.99	1755.23	1579.83	2961.91	2717.15	1479.69	2301.09	1933.56	1412.82	2886.54	2094.49	-0.00873236	0.988696	1.00607
Alg11	1951.43	2257.55	1971.7	2233.77	2099.64	2182.39	1871.74	1860.15	1974.04	1995.41	2184.47	1835.83	2034.84	0.0767179	0.451386	0.948212
Alg12	635.807	630.573	648.397	740.27	819.928	660.333	612.441	662.521	689.386	672.392	665.363	667.67	675.423	0.124675	0.188001	0.91721
Alg13	1786.89	1978.36	1899.9	1516.82	1608.64	1812.49	1592.88	1687.06	1623.47	1474.22	1674.64	1590.35	1687.14	-0.127796	0.199224	1.09262
Alg14	694.038	814.45	712.464	673.758	674.67	713.763	646.857	663.399	655.269	581.9	699.063	688.833	684.872	-0.0540947	0.685256	1.03821
Npbwr1	23.0217	19.2541	11.046	19.0034	34.8139	32.8797	11.4722	15.8161	10.5878	40.0915	40.6131	31.7434	24.1953	1.09728	0.0023914	0.467398
Bst1	19.6362	34.6574	25.4057	57.8741	73.2293	64.3893	15.0021	24.6029	31.7635	40.0915	49.2542	35.9759	39.3235	1.09595	0.000371559	0.467827
Alg5	887.014	1008.92	888.094	1017.55	1022.81	854.871	923.956	1003.45	935.259	875.14	1067.17	893.049	948.106	0.0236411	0.877777	0.983747
Alg6	1163.95	1370.89	1191.86	1011.5	1115.25	1228.88	1215.17	1129.98	1212.9	1116.83	1269.37	1159.69	1182.19	-0.0780409	0.474472	1.05558
Alg8	706.903	848.144	774.321	798.144	735.895	756.232	684.804	713.484	757.618	728.52	818.31	723.751	753.844	0.0276585	0.838508	0.981011
Gm15823	8.80243	14.4406	19.8827	19.8672	31.2125	31.5097	12.3547	16.6948	5.88213	26.3458	25.9232	31.7434	20.3883	1.09076	0.00320084	0.469515
Alk	36.564	20.2168	14.3597	6.04655	8.40337	26.0297	15.0021	15.8161	16.47	10.3092	12.9616	24.3366	17.2097	-0.458197	0.512341	1.37382
Tmprss2	10.1567	13.4779	7.73217	18.1396	27.6111	21.9198	21.1795	14.9375	9.41141	40.0915	46.6618	9.52303	20.0702	1.08805	0.0401933	0.470397
Fgf8	23.6989	24.0677	13.2551	29.3689	45.6183	39.7296	12.3547	7.0294	8.23498	36.6551	17.2822	23.2785	23.3811	1.08756	0.0211281	0.470557
Alkbh3	833.523	929.012	860.48	997.68	953.182	938.44	892.187	970.057	982.316	887.741	911.634	1192.5	945.729	0.106477	0.379501	0.928853
Alkbh4	522.052	512.16	581.017	563.193	575.03	526.075	587.731	552.686	518.804	577.318	520.193	593.602	552.488	0.0354308	0.769115	0.97574
Tmem108	169.955	116.487	134.761	222.858	290.516	371.266	175.613	137.952	116.466	295.532	286.884	343.887	221.848	1.07991	2.07099e-11	0.47306
Fam19a2	178.08	136.704	87.263	228.041	331.333	209.608	104.133	82.5954	70.5856	205.039	245.407	176.705	171.291	1.07469	3.15008e-05	0.474772
Alkbh7	346.68	316.73	347.947	338.607	300.12	330.167	369.759	396.282	399.985	340.205	300.71	379.863	347.255	-0.129053	0.325653	1.09358
Alkbh8	2673.23	3032.53	2892.93	2818.55	2673.47	2946.84	2513.3	2579.79	2698.72	2785.79	2984.63	2496.09	2757.99	0.0279049	0.819515	0.980844
Alms1	1446.98	1106.15	1503.35	1452.9	1198.08	2104.3	1503.74	1044.74	1454.06	1476.51	1234.81	1831.6	1446.44	0.205826	0.351497	0.867042
Alms1-ps1	27.0844	55.837	9.94136	50.9638	85.2341	24.6597	18.5321	9.66542	14.1171	40.0915	105.421	15.8717	38.1183	1.2526	0.0638794	0.419692
Alms1-ps2	337.878	484.241	364.516	338.607	392.557	205.498	300.043	446.367	317.635	364.26	425.141	179.88	346.385	-0.238232	0.477807	1.17955
Tmprss11d	149.641	156.921	183.363	292.826	230.492	401.406	118.252	99.2903	83.5262	198.167	239.358	305.795	204.92	1.07407	5.94994e-06	0.474976
Gm6710	178.08	163.66	165.689	538.143	386.555	360.306	259.449	249.544	217.639	410.079	439.831	442.292	317.606	1.06424	4.93054e-12	0.478225
Alox5	11.5109	5.77624	23.1965	13.8207	8.40337	13.6999	16.7671	12.3014	22.3521	4.58189	5.18465	23.2785	13.4061	-0.403914	0.626462	1.32309
Alox5ap	29.7929	25.9931	46.393	33.6879	34.8139	46.5795	23.8269	33.3896	45.8806	35.5096	45.7977	27.511	35.7647	0.138201	0.764988	0.908651
Alox8	43.3351	54.8743	72.9033	59.6017	68.4274	52.0595	42.359	47.4484	62.3506	49.2553	55.3029	93.1141	58.4193	0.237256	0.496657	0.848357
Aloxe3	20.3133	28.8812	30.9287	24.1862	25.2101	30.1397	31.7693	31.6323	44.7042	21.764	24.195	38.0921	29.318	-0.190224	0.675738	1.14094
Alpk1	458.404	441.882	434.106	466.448	453.782	405.516	535.665	538.628	618.8	664.374	632.527	660.264	525.866	0.118839	0.636167	0.920929
Cyp4a31	16.2506	11.5525	9.94136	21.5948	37.2149	34.2496	13.2372	20.2095	15.2935	29.7823	25.9232	33.8597	22.4258	1.05228	0.00128522	0.482206
Alpk3	14.2193	14.4406	17.6735	12.9569	7.20289	15.0698	12.3547	14.9375	18.8228	11.4547	9.50519	9.52303	13.1801	-0.486397	0.315117	1.40094
Alpl	5250.31	5580.81	5572.68	7799.18	7440.58	3763.35	4395.63	7072.45	7146.79	5644.88	4738.77	11972.6	6364.83	0.240153	0.609921	0.846656
Nmnat3	105.629	97.2333	79.5308	219.403	206.483	201.388	106.78	91.3822	99.9962	185.566	184.919	209.507	148.985	1.05017	2.79535e-20	0.482912
Als2cl	224.801	259.931	309.287	303.191	369.748	282.217	228.562	280.297	287.048	269.186	279.107	330.132	285.292	0.209622	0.184129	0.864764
Aldh3a1	27.7615	33.6947	17.6735	55.2827	70.8284	52.0595	27.3569	14.0588	19.9992	42.3825	44.0695	27.511	36.0565	1.04467	0.0021265	0.484755
Alx3	51.4604	62.5759	74.0079	44.9172	34.8139	34.2496	63.5385	82.5954	69.4091	37.8006	34.5643	86.7654	56.3915	-0.556728	0.105256	1.47093
Alx4	333.815	314.805	370.039	455.219	519.808	310.987	394.468	380.466	464.688	331.041	369.838	542.813	398.999	0.166188	0.500942	0.891194
Alyref	5502.88	4885.73	4800.57	5357.24	5294.12	5423.77	5314.29	4984.72	4635.12	5429.54	4770.74	4959.38	5113.18	0.0513167	0.571786	0.965055
Alyref2	211.936	189.653	222.024	253.955	255.702	209.608	220.62	208.246	221.168	245.131	241.95	234.902	226.241	0.183565	0.105187	0.880525
Amacr	1245.88	1349.71	1411.67	1752.63	1998.8	1286.42	1847.03	1612.37	1955.22	1903.77	1972.76	1900.37	1686.39	0.199878	0.295972	0.870624
Ambn	320.95	383.157	362.307	329.969	547.419	256.187	103.25	276.783	188.228	223.367	258.368	274.052	293.67	0.208432	0.687521	0.865478
Ambra1	3952.29	3587.04	3893.7	3701.35	3649.46	3785.27	3896.15	4032.24	3773.97	3794.95	3617.16	3789.11	3789.39	-0.0515491	0.336033	1.03638
Amd-ps3	53.4917	12.5152	15.4643	0	31.2125	46.5795	51.1838	50.9631	32.9399	18.3275	16.4181	22.2204	29.2763	-0.700092	0.483144	1.62461
Amd1	6503.64	7589.01	6134.92	7151.34	6920.77	6537.57	5349.59	5933.69	5538.61	6359.66	7237.77	5159.37	6368	0.0875359	0.601206	0.941129
Slc26a11	505.124	534.302	552.298	1229.18	1198.08	1063.11	671.567	553.565	694.091	1410.08	1221.85	1084.57	893.15	1.03982	9.51171e-25	0.486389
Kcns2	26.4073	30.8066	68.4849	63.9206	90.0361	50.6895	43.2415	29.8749	41.1749	99.656	71.721	112.16	60.6811	1.03686	0.00127036	0.487389
Amer1	3244.71	3495.59	3511.51	3055.23	3294.12	3648.27	3357.83	3137.75	3293.99	3483.38	3650.86	3244.18	3368.12	0.023756	0.82768	0.983668
Lrrc4c	41.3037	21.1795	14.3597	27.6414	48.0192	45.2095	39.7116	37.783	29.4106	104.238	75.1774	78.3005	46.8612	1.03271	0.0164546	0.488792
Amfr	4954.42	5375.75	5038.06	5293.32	5362.55	5037.44	4853.64	5008.45	4895.11	5145.46	4973.81	4800.67	5061.55	0.0231837	0.752366	0.984059
Amh	52.8146	37.5455	39.7654	45.781	62.425	35.6196	60.0086	55.3565	51.7627	27.4913	36.2925	40.2084	45.4226	-0.267341	0.454007	1.20359
Amhr2	35.2097	24.0677	20.9873	37.1431	22.8091	31.5097	37.0641	20.2095	31.7635	29.7823	24.195	27.511	28.521	0.0247822	0.968612	0.982969
Amigo1	1033.95	1100.37	1234.94	1331.97	1358.94	1054.89	1340.49	1127.34	1330.54	1414.66	1351.46	1526.86	1267.2	0.167326	0.207575	0.890492
Amigo2	267.459	305.178	286.09	269.503	282.113	349.346	247.094	308.415	277.637	309.277	331.817	295.214	294.095	0.11766	0.409656	0.921681
Amigo3	395.432	380.269	375.562	488.043	440.576	349.346	426.238	420.885	389.397	486.825	426.005	450.757	419.111	0.147992	0.225972	0.902506
Ammecr1	2350.93	2741.79	2430.11	2665.66	2566.63	2637.22	2057.94	1981.41	2021.1	2347.07	2760.83	2266.48	2402.26	0.166519	0.16914	0.89099
Ammecr1l	5442.61	6194.05	5636.75	5285.55	5297.72	5819.7	5450.19	5519.84	5352.74	5316.13	5881.12	5275.76	5539.35	-0.0312799	0.72863	1.02192
Amn	182.143	129.003	160.166	41.462	52.8212	164.398	82.0706	84.3528	59.9977	24.0549	22.4668	77.2424	90.0149	-0.876729	0.148891	1.83621
Amn1	752.27	932.862	877.048	869.839	735.895	852.131	828.648	748.631	1014.08	901.486	965.209	756.552	852.888	-0.0174781	0.937394	1.01219
Art4	24.376	16.366	19.8827	32.8241	45.6183	34.2496	21.1795	19.3308	16.47	50.4008	42.3413	38.0921	30.0943	1.03198	8.83806e-05	0.489039
Magohb	328.398	443.808	331.379	771.367	703.482	679.513	355.639	348.834	329.399	736.538	823.495	648.624	541.706	1.03123	3.65319e-27	0.489293
Amotl2	2003.57	2117.95	2204.77	2029.05	2641.06	2122.11	1936.16	2222.17	2211.68	2273.76	1922.64	2320.45	2167.11	0.0676938	0.60529	0.954162
Ampd2	3356.44	3014.23	3425.35	3880.16	3757.51	3040	3260.76	3407.5	3426.93	3784.64	3268.06	3599.71	3435.11	0.101207	0.293413	0.932253
Ptprn2	20.3133	11.5525	7.73217	22.4586	39.6159	34.2496	22.9445	27.2389	15.2935	53.8372	36.2925	31.7434	26.9393	1.03049	0.00967504	0.489545
Amph	265.427	184.84	222.024	264.32	278.512	239.748	397.116	338.29	372.927	429.552	436.375	454.989	323.677	0.241587	0.497954	0.845814
Amt	501.739	564.146	575.494	539.87	565.427	550.734	591.261	548.293	636.446	540.663	616.109	594.661	568.737	0.000773858	0.996982	0.999464
Amy1	113.077	196.392	99.4136	157.21	138.055	141.109	124.43	136.195	187.052	155.784	154.675	172.473	147.989	0.107495	0.735313	0.928198
Amy2a5	16.2506	21.1795	4.41838	17.2758	12.0048	16.4398	20.297	3.5147	22.3521	9.16377	12.0975	19.0461	14.5034	-0.0311804	0.978424	1.02185
Amz1	58.2315	60.6505	56.3343	54.4189	78.0313	52.0595	46.7714	44.8124	56.4684	76.7466	72.5851	74.068	60.9315	0.337651	0.152286	0.791329
Amz2	3663.17	3863.34	3788.76	3503.54	3605.04	3593.47	3664.05	3868.81	4033.96	3634.58	3777.02	3347.88	3695.3	-0.0916785	0.0806968	1.06561
Anapc1	13465.7	12909.9	13451.8	12985.4	13088.8	15124.6	13093.3	12849.7	12576	12970.2	13119.8	14137.5	13314.4	0.0553055	0.438357	0.962391
Anapc10	668.985	860.66	738.974	657.346	631.453	689.103	677.744	716.12	691.738	617.409	810.533	601.009	696.756	-0.11797	0.397795	1.08521
Anapc11	2581.82	2081.37	2401.39	2217.36	2318.13	2353.64	2878.65	2585.06	2791.66	2302.4	1906.22	2463.29	2406.75	-0.176519	0.121765	1.13015
Anapc13	957.434	719.142	845.015	982.132	974.79	1006.94	1031.62	960.392	1117.6	1044.67	888.303	1043.3	964.279	0.07671	0.651915	0.948218
Anapc15	1658.24	1646.23	1377.43	1415.76	1499.4	1552.19	1489.63	1509.56	1445.83	1272.62	1469.85	1302.54	1469.94	-0.102259	0.30778	1.07345
Anapc16	2352.28	2375.96	2341.74	2412.57	2477.79	2390.63	2408.29	2329.37	2516.38	2563.57	2335.68	2470.7	2414.58	0.03273	0.5927	0.977569
Anapc2	6892.98	6399.11	6675.07	6451.67	6717.89	6959.53	7115.43	7324.63	7136.2	6917.5	6444.52	7597.26	6885.98	-0.0161763	0.884191	1.01128
Anapc4	4558.98	5270.82	4713.31	4890.79	4749.1	4622.33	4387.69	4572.62	4691.59	4801.82	5085.28	4295.95	4720.02	0.0132652	0.914449	0.990847
Anapc5	23247.9	22174	23157.8	23037.3	23379.4	23943.2	23154.5	22997.6	23670.9	22944.9	22364	23821.3	23157.7	0.0111433	0.835159	0.992306
Anapc7	3355.76	3305.93	3303.84	3450.85	3539.02	3394.83	3263.41	3332.81	3257.52	3309.27	3262.87	3324.6	3341.73	0.0323455	0.506539	0.977829
Ang	26.4073	22.1422	22.0919	16.4121	19.2077	26.0297	23.8269	30.7536	22.3521	24.0549	20.7386	25.3948	23.2843	-0.184362	0.675262	1.13631
Angel1	837.585	882.802	815.191	880.205	870.349	800.072	893.952	876.917	861.144	796.103	779.425	853.899	845.637	-0.0530586	0.534562	1.03746
Angel2	3143.82	3639.03	3286.17	3237.49	3339.74	3168.78	3223.7	3448.8	3382.22	3100.79	3583.46	3116.15	3305.85	-0.041098	0.644386	1.0289
Angpt1	1549.91	1750.2	1399.52	1618.75	1739.5	1252.17	1148.11	1535.04	1592.88	1599.08	1748.95	2301.4	1602.96	0.193452	0.32045	0.874511
Angpt2	118.494	140.555	127.028	112.293	98.4394	75.3492	213.56	297.871	414.102	127.147	179.734	219.03	176.967	-0.687801	0.126379	1.61083
Gm14443	144.224	159.809	132.551	290.234	306.123	304.137	159.729	171.342	155.288	311.568	379.343	285.691	233.337	1.0255	1.60253e-21	0.491239
Slc7a11	217.352	204.094	225.337	386.115	364.946	487.715	271.804	224.062	279.989	591.063	533.155	525.883	359.293	1.02359	1.33885e-12	0.491891
Cdh15	13.5422	23.105	22.0919	61.3293	20.4082	21.9198	15.0021	27.2389	14.1171	63.0009	28.5156	37.034	28.9421	1.02246	0.0228888	0.492277
Angptl6	89.3786	44.2845	71.7987	68.2396	79.2317	78.0892	85.6005	79.9594	72.9384	88.2013	71.721	81.4748	75.9098	0.0623255	0.867419	0.957719
Angptl7	43.3351	44.2845	48.6022	43.1896	44.4178	54.7994	56.4787	50.9631	35.2928	38.946	50.1183	48.6733	46.5917	-0.00172288	0.997541	1.00119
Ank	3722.75	3716.05	3723.59	3675.44	2948.38	3238.65	3095.74	3114.02	2446.97	3005.72	2902.54	2656.93	3187.23	-0.105211	0.563311	1.07565
Ank1	494.291	314.805	370.039	311.829	339.736	257.557	269.156	201.217	131.76	223.367	217.755	265.587	283.092	-0.142923	0.764268	1.10414
Tmem181a	2298.11	2590.64	2220.24	5086.87	4735.9	4055.16	2198.26	2026.22	2237.56	4576.16	4881.35	4198.6	3425.42	1.02118	2.23604e-44	0.492713
Ank3	4078.24	3728.56	3839.57	3224.54	3199.28	4434.64	3265.17	2920.72	2872.83	3081.32	3186.83	3046.31	3406.5	-0.0381748	0.87462	1.02681
Ankdd1b	189.591	221.422	210.978	212.493	200.48	213.718	233.857	208.246	202.345	161.512	210.842	185.17	204.221	-0.0938239	0.575821	1.0672
Ankef1	56.8773	51.9861	49.7068	36.2793	37.2149	39.7296	53.8312	45.6911	74.1148	45.8189	36.2925	45.4989	47.7535	-0.462634	0.0534828	1.37806
Ankfy1	5760.85	5977.44	6002.37	5768.41	6074.43	6496.47	5790.83	6047.92	6249.17	5808.69	6011.6	6054.53	6003.56	0.0152835	0.841621	0.989462
Hjurp	11762.1	11937.6	12036.8	21342.6	22962.8	26333.9	10876.6	10607.4	10797.2	21113.3	22708.8	23426.7	17158.8	1.01939	1.2278e-62	0.493324
Ankib1	2566.25	2681.14	2489.76	2691.58	2504.2	2801.62	2282.09	2223.93	2176.39	2491.4	2571.59	2573.34	2504.44	0.116011	0.170105	0.922736
Gm8925	11.5109	14.4406	14.3597	20.731	12.0048	23.2898	9.70727	17.5735	9.41141	36.6551	38.0208	24.3366	19.3368	1.01564	0.0167724	0.494609
Ankle2	3888.64	4192.59	3910.27	3846.47	3715.49	3957.89	3673.76	3805.54	3785.74	3737.67	3973.17	3610.29	3841.46	-0.0258899	0.736923	1.01811
Ankmy1	20.9904	16.366	30.9287	19.8672	7.20289	19.1798	26.4744	20.2095	38.8221	17.1821	20.7386	20.1042	21.5055	-0.535371	0.241244	1.44932
Pcp4l1	427.257	500.607	446.256	1014.96	837.936	546.624	283.276	241.636	132.936	673.537	653.266	377.747	511.336	1.0139	0.0141619	0.495207
Angptl1	438.09	552.593	660.548	1116.02	1326.53	776.782	330.047	412.977	490.57	920.959	875.341	792.528	724.416	1.01118	5.72666e-08	0.49614
Adarb2	567.418	519.861	421.955	1113.43	917.167	819.252	444.77	468.334	431.748	973.651	1142.35	774.54	716.206	1.00751	6.50258e-17	0.497403
Ms4a7	31.1471	33.6947	43.0792	79.4689	58.8236	76.7192	37.9466	23.7242	35.2928	81.3285	58.7593	53.9639	51.1623	1.00516	8.36375e-06	0.498214
Ankrd12	1203.9	1154.28	1462.48	1215.36	974.79	1667.27	1333.43	1008.72	1374.07	1201.6	1122.48	1433.75	1262.68	0.0147355	0.962346	0.989838
Prdm9	164.538	202.168	202.141	380.932	421.369	346.606	206.5	195.066	235.285	423.825	438.967	390.444	300.653	1.0037	4.55379e-23	0.498718
Pde11a	13.5422	18.2914	25.4057	46.6448	44.4178	23.2898	15.0021	26.3602	34.1164	50.4008	52.7106	42.3246	32.7089	1.00046	0.0037134	0.499842
Ankrd13c	1991.38	2360.56	2110.88	1958.22	1996.4	1901.54	1947.63	1940.11	1838.75	1919.81	2122.25	1628.44	1976.33	-0.0803272	0.5115	1.05726
Ankrd13d	577.575	502.533	575.494	553.691	567.827	538.404	707.748	633.525	665.857	754.866	660.179	688.833	618.878	0.0401125	0.860018	0.972579
Ankrd16	3317.16	3535.06	3365.7	3665.07	3571.43	3434.55	3419.61	3349.51	3899.85	3837.33	4012.05	3693.88	3591.77	0.0901782	0.236858	0.939407
Coro2b	639.869	476.54	527.996	1156.62	1048.02	853.501	538.312	483.271	449.395	1185.56	994.588	976.64	777.526	0.994489	2.60861e-20	0.501914
Ubap1l	9.47954	11.5525	13.2551	25.05	27.6111	30.1397	18.5321	13.1801	17.6464	22.9094	30.2438	28.5691	20.6807	0.993278	0.00216823	0.502335
Ankrd23	675.079	496.756	629.619	567.512	623.05	468.535	618.618	704.697	745.854	736.538	670.548	683.542	635.029	-0.0444976	0.859595	1.03132
Ankrd24	1659.6	1705.92	1944.09	1726.72	1990.4	1683.71	2139.13	1997.23	2326.97	2293.23	2073	2208.29	1979.02	0.0253419	0.912405	0.982588
Palm2	124.588	109.749	134.761	213.357	278.512	245.227	155.316	115.985	134.113	225.658	212.571	358.701	192.378	0.985161	2.62826e-09	0.505169
Cdh7	22.3446	28.8812	54.1252	41.462	37.2149	61.6494	59.1261	43.0551	44.7042	159.221	101.965	92.056	62.1503	0.973399	0.0366121	0.509305
Ankrd28	3884.58	3973.09	3579.99	4067.6	3835.54	3882.54	3302.24	3101.72	2851.66	3397.47	3540.25	3250.53	3555.6	0.0862626	0.561686	0.94196
Vill	529.5	496.756	490.44	796.417	1189.68	1097.36	653.035	574.653	719.973	994.269	1305.67	1413.64	855.116	0.972858	1.13028e-10	0.509496
Ankrd33b	31.1471	30.8066	38.6608	30.2327	33.6135	36.9896	22.9445	27.2389	34.1164	20.6185	31.972	37.034	31.2812	0.0481317	0.927307	0.967188
Ankrd34a	85.3159	49.098	66.2757	65.6482	102.041	60.2794	78.5407	91.3822	71.762	92.7832	77.7697	100.521	78.4514	0.167512	0.620096	0.890377
Ankrd34b	29.1157	37.5455	13.2551	27.6414	19.2077	12.3299	17.6496	21.9669	10.5878	20.6185	12.0975	22.2204	20.353	-0.196651	0.781573	1.14604
Ankrd35	194.331	181.952	206.559	155.483	169.268	193.168	184.438	152.889	154.112	140.893	114.062	147.078	166.186	-0.232522	0.236858	1.17489
Ankrd37	192.976	191.579	174.526	145.981	188.476	149.328	210.03	203.853	181.17	170.675	171.093	159.775	178.289	-0.232902	0.0729408	1.1752
Ankrd39	544.397	527.563	564.448	503.591	547.419	521.965	564.787	493.815	649.387	605.955	553.893	662.38	561.633	0.0236067	0.903006	0.98377
Ankrd40	3542.64	3949.98	3944.51	3466.4	3446.58	4149.69	3724.06	3963.7	4085.73	3666.65	3833.18	3813.45	3798.88	-0.0527193	0.574066	1.03722
Ankrd42	276.938	279.185	276.149	234.088	267.707	286.327	317.693	271.511	377.633	327.605	281.699	307.911	292.037	-0.0762036	0.70942	1.05424
Ankrd44	2728.75	2800.51	2609.05	3061.28	3188.48	2692.02	2889.24	2689.62	3090.47	3159.21	2964.75	3303.43	2931.4	0.128876	0.100633	0.914544
Ankrd45	325.69	330.208	303.764	233.224	220.888	308.247	327.4	367.286	317.635	336.769	421.685	289.923	315.227	-0.122229	0.625021	1.08842
Abhd14a	727.894	701.813	701.418	1453.76	1510.2	1398.76	802.174	786.414	889.378	1625.42	1424.91	1624.21	1137.2	0.972603	1.03838e-40	0.509586
Ankrd49	1662.31	2074.63	1597.24	1832.1	1749.1	1807.01	1629.94	1572.83	1589.35	1703.32	1985.72	1544.85	1729.03	0.069277	0.623247	0.953116
Ankrd50	5049.89	4882.85	5091.08	4781.96	5199.28	4803.17	4956	5592.77	5244.51	5368.83	4982.45	5928.62	5156.78	0.0115232	0.933482	0.992045
Ankrd52	9171.46	7977.95	9384.64	8795.13	9399.77	9410.43	9233.38	8524.02	9704.34	9199.28	8332.59	9839.41	9081.03	0.0258711	0.82266	0.982227
Sstr1	59.5857	85.6809	55.2298	138.207	184.874	82.1992	73.2458	73.8087	52.9392	116.838	45.7977	219.03	98.953	0.972486	0.0111538	0.509627
Ankrd54	1638.61	1410.36	1592.83	1504.73	1603.84	1474.1	1695.24	1650.15	1518.77	1643.75	1461.21	1664.41	1571.5	-0.0247667	0.835319	1.01732
Ankrd55	11.5109	10.5898	7.73217	11.2293	4.80192	10.9599	14.1197	18.4522	16.47	14.8911	17.2822	8.46492	12.2087	-0.20651	0.780749	1.15389
Scn1b	146.256	97.2333	115.982	324.786	310.925	238.378	177.378	171.342	182.346	320.732	192.696	357.643	219.641	0.970262	4.45312e-06	0.510413
Ankrd61	79.899	65.464	62.9619	68.2396	92.437	71.2393	75.0107	61.5072	70.5856	72.1647	68.2645	48.6733	69.7039	0.00941638	0.981656	0.993494
Ankrd63	665.599	644.051	741.183	529.505	424.97	602.794	471.244	540.385	434.101	301.259	318.856	357.643	502.633	-0.465441	0.0528939	1.38074
Ankrd9	298.606	211.795	297.136	360.201	316.927	319.207	276.216	293.477	284.695	312.714	267.873	294.156	294.417	0.169994	0.268677	0.888847
Rab3d	672.371	606.505	609.736	1457.22	1252.1	1008.31	571.847	614.194	558.802	1210.76	1132.85	1050.71	895.45	0.968735	2.37854e-24	0.510954
Anks1b	281.678	278.222	290.508	119.203	174.07	323.317	102.368	127.408	178.817	85.9104	110.606	95.2303	180.611	-0.475009	0.361803	1.38993
Gm12080	15.5735	22.1422	24.3011	42.3258	26.4106	32.8797	27.3569	18.4522	18.8228	49.2553	59.6235	33.8597	30.9169	0.966887	0.00261821	0.511609
Trpm3	55.523	51.0234	71.7987	114.021	105.642	98.639	155.316	105.441	110.584	302.405	192.696	257.122	135.018	0.963237	0.0232009	0.512905
Anks6	829.46	714.328	828.446	848.244	931.573	835.691	905.424	827.712	798.793	909.505	725.851	934.315	840.779	0.0784872	0.541825	0.94705
Ankub1	12.8651	15.4033	17.6735	19.8672	10.8043	17.8098	15.0021	15.8161	15.2935	8.0183	16.4181	20.1042	15.423	0.0351578	0.963909	0.975925
Sorcs3	31.1471	42.3591	15.4643	65.6482	84.0337	41.0996	40.5941	52.7205	51.7627	69.8738	99.3724	94.1722	57.354	0.961719	0.00564828	0.513445
Gm45623	109.015	81.83	102.727	263.457	182.473	130.149	79.4231	81.7168	30.5871	207.33	89.8672	73.0099	119.299	0.960329	0.0204719	0.51394
Cnnm1	69.7424	86.6436	85.0538	161.529	135.654	75.3492	42.359	67.658	45.8806	140.893	159.86	97.3466	97.3308	0.96016	0.0005238	0.514
Ano10	1444.95	1465.24	1561.9	1557.42	1500.6	1368.62	1467.56	1548.23	1581.12	1620.84	1519.97	1517.34	1512.81	0.00524013	0.965327	0.996374
Ano3	59.5857	31.7693	44.1838	14.6845	54.0216	53.4295	31.7693	23.7242	47.057	33.2187	41.4772	32.8016	38.9769	-0.0651111	0.932154	1.04617
Ano4	71.7737	55.837	47.4976	21.5948	33.6135	42.4696	39.7116	46.5698	44.7042	33.2187	36.2925	44.4408	43.1436	-0.551179	0.070756	1.46528
Ano6	5251.67	5701.15	5655.53	6159.7	6104.45	5673.11	4950.71	6025.07	5535.08	5597.92	5494.86	6943.35	5757.72	0.119443	0.20963	0.920543
Ano8	3422.79	2763.93	3384.48	3197.76	3339.74	2598.86	3358.72	3269.55	3318.7	3332.18	2902.54	3318.25	3183.96	-0.0624235	0.633521	1.04422
Upk3bl	236.311	172.324	203.245	265.184	332.533	513.745	230.327	258.33	151.759	569.299	379.343	380.921	307.777	0.958074	6.47363e-06	0.514744
Anp32a	12848.2	14511.8	12973.5	13191.8	12650.7	12957.3	13982.9	13507	13754.8	13421.5	16000.7	12066.7	13488.9	-0.0228004	0.869425	1.01593
Anp32b	19701.2	21533.8	19683.9	21940.3	19884.8	22281.5	20257.3	20327.3	18360.5	19473	20932.2	19982.5	20363.2	0.054622	0.489361	0.962847
Anp32e	14282.3	16903.2	14042.7	14169.7	14303.7	16175.4	14381.8	14839.9	13026.6	13542.9	15776.9	13569.3	14584.5	0.000921046	0.995944	0.999362
Pgam2	39.2724	27.9185	50.8114	82.9241	88.8356	63.0194	36.1817	57.9925	45.8806	90.4923	96.7801	75.1262	62.9362	0.955489	1.61156e-05	0.515667
Antxr1	9180.26	10337.5	9798.86	10214.3	10274.9	10525.6	8606.82	9796.35	10382	9722.76	10180.9	11639.3	10055	0.106795	0.191718	0.928649
Antxr2	1109.78	1338.16	1164.24	1367.38	1386.56	1034.34	1238.12	1680.03	1464.65	1347.07	1468.98	1776.57	1364.66	0.0689639	0.776417	0.953322
Anxa1	3761.35	5012.81	4528.84	3988.99	4219.69	4288.06	3633.17	4465.43	4124.55	4077.88	4177.96	3363.75	4136.87	-0.0818613	0.572269	1.05838
Anxa11	673.725	595.915	645.083	641.798	529.412	605.534	686.569	622.98	585.86	599.082	550.437	683.542	618.328	-0.0790858	0.527067	1.05635
Lrrc73	69.0652	48.1353	57.4389	120.067	123.65	82.1992	71.4808	74.6874	74.1148	153.493	136.529	148.136	96.5831	0.954448	9.69526e-07	0.516039
Astn1	566.064	386.045	396.55	837.015	1124.85	778.152	431.532	401.554	407.043	804.121	729.307	754.436	634.723	0.95444	1.30024e-12	0.516042
Cd164l2	29.1157	16.366	24.3011	33.6879	45.6183	63.0194	22.9445	20.2095	19.9992	45.8189	42.3413	30.6853	32.8423	0.949645	0.00125687	0.51776
Myo5b	100.212	85.6809	78.4262	169.303	141.657	220.568	99.7202	83.4741	88.2319	183.275	156.404	171.415	131.531	0.949591	2.61089e-11	0.517779
Anxa6	15127.3	13742.6	15748.2	16805.9	16007.2	15741.1	14531.8	15513.9	15557.1	16420.3	14138.5	18160.4	15624.5	0.108602	0.194142	0.927486
Anxa7	1894.55	1971.62	2064.49	2073.97	2134.46	2202.94	1843.5	2015.68	2142.27	2079.03	2132.62	2231.56	2065.56	0.108595	0.067502	0.927491
Gm11231	6.09399	12.5152	12.1505	22.4586	16.8067	23.2898	17.6496	8.78675	7.05856	17.1821	17.2822	26.4529	15.6439	0.948085	0.0282295	0.51832
Anxa9	62.9713	79.9046	82.8446	58.7379	72.0289	78.0892	103.25	79.9594	75.2913	75.6011	72.5851	62.4288	75.3077	-0.210187	0.391338	1.15684
Aoah	13.5422	16.366	6.62757	8.63792	18.0072	4.10996	6.17736	9.66542	10.5878	13.7457	19.0104	12.6974	11.5979	0.279013	0.720074	0.824155
Aoc2	834.2	738.396	744.497	824.922	810.325	728.833	759.815	698.546	751.736	781.212	751.774	674.019	758.189	0.0132409	0.931921	0.990864
Aoc3	97.5039	96.2706	93.8906	76.0137	91.2365	91.7891	109.427	76.4447	130.583	69.8738	68.2645	64.545	88.8203	-0.390625	0.0655331	1.31096
Aox1	35.2097	50.0607	55.2298	55.2827	50.4202	36.9896	69.7159	65.0219	47.057	54.9826	66.5363	46.5571	52.7553	-0.0391181	0.937876	1.02749
Aox3	48.0748	60.6505	62.9619	57.8741	46.8188	30.1397	115.605	98.4116	128.23	120.275	105.421	121.683	83.0121	-0.0860111	0.915131	1.06143
Aox4	152.35	158.847	165.689	196.945	144.058	183.578	118.252	133.559	150.583	182.13	165.045	118.509	155.795	0.174206	0.436506	0.886255
Ap1ar	3349.66	3767.07	3467.32	3634.84	3602.64	3411.26	3559.92	3851.23	3428.11	3788.07	4128.71	3486.49	3622.94	0.0423473	0.674488	0.971074
Ap1b1	3724.11	3289.57	3518.14	3709.12	3721.49	3783.9	3719.65	3744.03	3630.45	3729.66	3424.46	4063.16	3671.48	0.0520597	0.517913	0.964558
Ap1g1	7365.61	8203.22	7747.63	7530.54	7518.61	7951.4	7305.16	7630.41	7349.13	7429.53	8191.74	7212.11	7619.59	0.00747123	0.942496	0.994835
Ap1g2	1017.7	917.459	1215.05	945.853	1024.01	1035.71	1193.11	1138.76	1157.6	1140.89	986.811	1205.19	1081.51	-0.066843	0.657589	1.04742
Ap1m1	3321.23	2980.54	3192.28	3253.04	3404.56	3255.09	3656.99	3741.4	3793.97	3413.51	3192.88	3738.32	3411.98	-0.0302312	0.827252	1.02118
Ap1m2	1304.79	1240.93	1251.51	1227.45	1067.23	1420.68	1217.82	1214.33	1068.19	1245.13	1212.34	1068.7	1211.59	-0.0129629	0.943695	1.00903
Ap1s1	3625.25	3302.08	3388.9	3751.45	3755.1	3401.68	3708.18	3808.18	3601.04	3635.73	3413.23	3418.77	3567.46	-0.00412667	0.971674	1.00286
Ap1s2	907.328	1057.05	953.266	881.068	792.317	767.192	816.293	970.057	885.849	736.538	975.578	857.073	883.301	-0.155455	0.187251	1.11377
C1ql3	23.6989	32.732	20.9873	37.1431	49.2197	34.2496	27.3569	16.6948	19.9992	49.2553	62.2158	40.2084	34.4801	0.947253	0.00102022	0.518619
Ap2a1	6746.05	5266	6148.18	6487.08	7014.41	6670.46	6362.68	6417.84	5985.66	6823.58	5650.4	7258.67	6402.58	0.111467	0.289318	0.925647
Ap2a2	7687.23	6913.19	7361.02	7969.35	8028.82	8155.53	7186.03	7331.66	6910.33	7542.93	6928.42	8074.47	7507.42	0.105503	0.104698	0.929481
Ap2b1	8811.24	9020.56	8882.05	8986.03	8794.72	8876.14	8320.02	9066.17	8771.43	9032.04	9131.03	9126.24	8901.47	0.0293162	0.519833	0.979885
Ap2m1	12693.1	11110.6	11742.9	12335.8	11947.2	11729.8	12673.3	12853.3	12941.9	12153.5	11045	12628.6	12154.6	-0.043114	0.61167	1.03034
Ap2s1	3430.92	2651.29	3190.07	3463.81	3472.99	3307.15	3440.79	3386.41	3475.16	3592.2	2895.63	3747.84	3337.85	0.0649142	0.637281	0.956002
Ap3b1	3297.53	3801.73	3578.89	3492.31	3423.77	3579.77	3459.32	3660.56	3468.1	3475.36	3512.6	3559.5	3525.79	-0.0147578	0.857986	1.01028
Ap3b2	207.196	6.73894	16.5689	7.77413	84.0337	15.0698	77.6582	9.66542	10.5878	10.3092	12.9616	12.6974	39.2717	-1.21028	0.318537	2.31382
Ap3d1	8150.38	7403.21	8316.5	7954.66	8166.87	7748.64	8261.77	8589.05	8656.14	8495.96	7617.98	8631.04	8166.02	-0.0223993	0.818264	1.01565
Ap3m1	4837.95	6302.84	4858.01	5287.27	5212.49	4673.02	4614.48	5083.13	4888.05	4793.8	5934.69	4098.08	5048.65	-0.0275987	0.895512	1.01931
Crtac1	945.246	701.813	640.665	1559.15	1204.08	912.411	963.667	680.094	674.092	2230.23	1628.84	1346.98	1123.94	0.947074	3.39329e-06	0.518683
Ap3s1	2434.89	3127.83	2394.76	2661.34	2687.88	2265.96	2285.62	2560.46	2244.62	2336.76	2879.21	2229.45	2509.07	0.00158821	0.995111	0.9989
Ap3s2	3806.04	3727.6	3575.57	3442.21	3702.28	3640.05	4076.17	3932.07	4004.55	3689.56	3827.13	3504.48	3743.98	-0.0847747	0.157778	1.06052
Klhl32	160.475	168.474	152.434	360.201	332.533	258.927	211.795	123.893	155.288	310.423	337.866	267.703	236.668	0.943472	6.21006e-11	0.51998
Ap4e1	1492.35	1556.7	1482.37	1477.09	1440.58	1496.02	1379.32	1369.85	1515.24	1523.48	1715.25	1594.58	1503.57	0.0737962	0.393469	0.950135
Fcrls	114.432	110.711	112.669	201.264	291.717	242.488	163.259	178.371	161.17	269.186	286.02	324.841	204.677	0.942981	1.12998e-07	0.520157
Ap4s1	517.312	553.556	501.486	520.003	486.195	439.765	457.124	486.786	501.157	509.735	515.873	397.851	490.57	-0.0700191	0.622447	1.04973
Cbln2	81.9303	108.786	79.5308	229.769	186.075	93.159	91.7779	51.8418	61.1741	120.275	116.655	166.124	115.591	0.942741	0.000975623	0.520244
Ap5m1	766.489	729.731	831.76	648.708	692.677	830.211	758.05	685.366	824.675	734.247	771.648	752.32	752.157	-0.0534299	0.68601	1.03773
Ap5s1	378.505	343.686	378.876	425.85	415.366	387.706	438.592	410.341	395.279	465.062	368.11	431.711	403.257	0.0876532	0.514064	0.941052
Ap5z1	1232.34	1046.46	1312.26	1214.49	1306.12	1259.02	1329.01	1299.56	1278.78	1364.26	1220.12	1379.78	1270.18	0.0460404	0.703894	0.968591
Apaf1	2495.83	2652.26	2821.14	2510.18	2564.23	2926.29	2586.55	2505.1	2706.96	2521.18	2697.75	2819.88	2650.61	0.0248531	0.811734	0.982921
Apba1	228.186	179.063	192.2	162.393	241.297	178.098	277.099	249.544	304.694	191.294	194.424	289.923	224.018	-0.186428	0.504776	1.13794
Apba2	177.403	29.8439	44.1838	63.0569	105.642	30.1397	137.667	93.1395	68.2327	132.875	120.111	126.974	94.1057	0.0693227	0.944682	0.953085
Apba3	1747.62	1277.51	1690.03	1670.57	1827.13	1690.56	1872.62	1854.88	1874.05	1943.87	1398.13	2000.9	1737.32	0.0292239	0.901944	0.979947
Apbb1	2193.84	1761.75	1988.27	1752.63	1996.4	1970.04	2350.04	2172.96	2145.8	1974.79	1899.31	2485.51	2057.61	-0.062972	0.696475	1.04462
Apbb1ip	192.976	226.236	310.391	392.162	388.956	298.657	217.09	207.367	214.11	206.185	206.522	267.703	260.696	0.36518	0.154663	0.776372
Zfp14	323.659	388.933	320.333	741.134	671.069	567.174	331.812	382.224	391.75	712.483	796.708	603.125	519.2	0.940067	1.87839e-19	0.521209
Apc	7414.36	6032.32	7589.67	6677.98	6018.01	8722.7	6865.69	6034.74	6589.16	6778.9	6263.06	7772.91	6896.62	0.0593097	0.737766	0.959723
Apc2	1060.35	467.875	722.405	897.48	1168.07	804.182	846.298	732.815	699.973	1077.89	910.77	1112.08	875.016	0.39711	0.0560128	0.759378
Apcdd1	8133.45	6662.89	6979.94	7806.09	7208.89	6436.19	5917.02	5590.13	4685.7	6599.06	5771.38	5587.9	6448.22	0.0535352	0.828479	0.963572
Apeh	1564.8	1410.36	1529.86	1626.52	1719.09	1441.23	1618.47	1720.45	1786.99	1778.92	1512.19	1730.02	1619.91	0.0267371	0.860831	0.981638
Sox15	11.5109	17.3287	5.52298	25.9138	24.0096	24.6597	11.4722	11.4228	9.41141	19.473	12.9616	22.2204	16.3256	0.934141	0.0242313	0.523354
Apex1	6172.54	5924.5	5347.34	5974.85	5788.72	5600.5	5825.25	5756.2	5459.79	5710.18	5908.77	4944.57	5701.1	-0.0237723	0.829633	1.01661
Olfml2a	782.062	926.124	1083.61	1508.18	1809.12	2123.48	675.097	729.3	830.557	1195.87	1206.29	1760.7	1219.2	0.933974	2.26326e-08	0.523414
Aph1a	5328.86	4601.74	4919.87	5029	5090.04	5029.22	5192.51	5230.75	5057.46	5154.62	4672.23	5374.17	5056.7	0.000232826	0.998778	0.999839
3000002C10Rik	268.813	240.677	227.547	475.95	470.589	421.956	238.269	243.393	274.107	498.28	483.036	498.372	361.749	0.932975	1.11833e-33	0.523777
Clcn6	2131.54	1830.1	1951.82	3836.1	3884.76	3803.08	2229.14	2010.41	2097.57	4045.81	3818.49	4011.31	2970.84	0.932945	1.90405e-77	0.523788
Api5	9256.1	10652.3	9548.12	10114.1	9900.37	9883.08	8706.54	9021.35	8425.56	9175.23	10394.4	8433.18	9459.2	0.058264	0.615789	0.960419
Apip	885.66	1022.39	842.806	856.882	967.588	861.721	835.708	920.851	844.674	851.085	958.296	836.969	890.386	-0.00549745	0.973229	1.00382
Rpl29	12539.4	8701.9	10637.3	21004	19686.7	22780.1	12789.8	11639.8	11590.1	21444.4	18987	25319.6	16426.7	0.928298	1.50703e-20	0.525478
Cbln1	520.698	545.855	511.428	1605.79	1234.09	1179.56	1167.52	1122.07	1091.72	2124.85	1716.12	1568.13	1198.99	0.927207	0.00424947	0.525875
Trex1	203.81	95.3079	153.539	346.381	330.132	241.118	150.904	144.103	224.697	340.205	235.037	354.468	234.975	0.926609	1.77713e-05	0.526094
Ism2	215.998	158.847	163.48	341.198	350.54	283.587	203.853	172.22	175.287	427.261	413.044	256.064	263.448	0.924962	2.5168e-09	0.526694
Aplp1	2751.78	1677.03	1915.37	2460.94	2613.45	2087.86	2383.58	1893.54	1651.7	2363.11	2100.65	2355.36	2187.86	0.187178	0.296489	0.878322
Slc1a2	148.287	136.704	122.61	263.457	314.526	231.528	60.0086	50.9631	70.5856	96.2196	95.0519	119.567	142.459	0.92485	0.0432199	0.526735
Gm20637	12.8651	28.8812	23.1965	30.2327	51.6207	38.3596	18.5321	14.0588	25.8814	33.2187	43.2054	33.8597	29.4926	0.920794	0.00485913	0.528218
Apoa1bp	1807.21	1655.85	1762.93	1776.82	1866.75	1893.32	1961.75	2035.01	2025.81	1958.76	1583.05	2046.39	1864.47	-0.0166016	0.92309	1.01157
Abhd15	43.3351	33.6947	41.9746	130.433	87.6351	47.9495	44.124	38.6617	30.5871	69.8738	48.3901	55.022	55.9734	0.919845	0.00514298	0.528566
Apobec2	20.3133	13.4779	20.9873	12.9569	14.4058	17.8098	11.4722	16.6948	15.2935	16.0366	16.4181	19.0461	16.2427	-0.0330265	0.963909	1.02316
Apobec3	312.825	332.134	363.412	321.331	342.137	308.247	293.866	354.985	428.219	319.587	312.807	361.875	337.619	-0.0801796	0.637149	1.05715
Apobr	60.2628	48.1353	80.6354	88.1068	86.4346	57.5394	60.8911	62.3859	63.527	45.8189	49.2542	73.0099	64.6668	0.0960821	0.819719	0.93557
Apoc1	11.5109	9.62706	19.8827	5.18275	14.4058	16.4398	19.4145	15.8161	22.3521	14.8911	25.0591	16.9298	15.9593	-0.0739057	0.934185	1.05256
Apoc4	66.3568	50.0607	37.5562	38.0069	52.8212	38.3596	49.4188	34.2683	84.7027	48.1098	65.6722	31.7434	49.7564	-0.225098	0.629784	1.16886
Tmem26	974.362	1244.78	1344.29	2403.93	2549.82	1553.56	852.475	672.186	588.213	1467.35	1547.62	1215.77	1367.86	0.919767	0.003417	0.528595
Apoe	1400.26	1205.31	1424.93	1153.16	1278.51	1272.72	1817.91	1795.13	1809.34	1437.57	1252.96	1733.19	1465.08	-0.217835	0.215916	1.16299
Apol6	12.8651	14.4406	18.7781	19.8672	27.6111	19.1798	15.0021	14.9375	15.2935	21.764	14.6898	7.4068	16.8196	0.273334	0.630297	0.827405
Apol7b	15.5735	20.2168	20.9873	25.05	26.4106	27.3997	12.3547	14.9375	21.1757	18.3275	30.2438	15.8717	20.7124	0.464417	0.253198	0.724764
Apold1	390.693	516.011	328.065	387.843	350.54	327.427	404.176	354.985	287.048	396.333	362.925	366.108	372.679	-0.0589501	0.815253	1.04171
Pot1b	440.799	485.204	449.57	856.018	769.508	861.721	478.304	434.944	468.218	835.049	1064.58	810.516	662.869	0.917302	7.02613e-27	0.529498
Apoo	619.556	528.526	494.859	634.024	573.83	519.225	505.661	472.727	537.627	449.025	518.465	524.825	531.529	0.0272626	0.896063	0.98128
Apoo-ps	169.278	230.087	163.48	133.024	183.674	178.098	161.494	187.158	94.1141	235.967	235.901	166.124	178.2	0.168962	0.625124	0.889482
Apool	1001.45	1135.99	917.918	942.398	896.759	967.21	981.317	1064.95	1044.67	948.451	1069.77	847.55	984.869	-0.115028	0.256261	1.083
Stk38l	1192.39	1213.01	1173.08	2063.6	2313.33	1963.19	1050.15	1096.59	982.316	2134.01	2421.23	1730.02	1611.08	0.912184	1.33886e-24	0.53138
App	14107.6	14649.5	14062.6	15038.6	15310.9	13336.8	14846	15607.9	15650	15752.5	14959.4	17862	15098.7	0.0532662	0.629784	0.963752
Appbp2	5502.2	5724.25	5733.95	5359.83	5284.52	5882.72	5169.56	4837.98	5335.09	5245.11	5389.44	5126.57	5382.6	-0.000798557	0.995601	1.00055
Appl1	4624.66	4421.71	4812.72	4540.09	4025.21	4949.76	4685.08	3952.28	4697.47	4616.25	4610.88	4509.69	4537.15	0.00315963	0.982838	0.997812
Fam46b	23.6989	20.2168	33.1379	61.3293	48.0192	69.8693	39.7116	28.9963	37.6456	44.6734	54.4388	63.4869	43.7687	0.908309	0.000357339	0.532809
Aprt	4080.27	2967.06	3571.16	4242.08	4180.07	3648.27	4149.42	4054.21	3725.74	4381.43	3414.96	4247.27	3888.49	0.096604	0.512281	0.935232
Aptx	1415.16	1349.71	1305.63	1199.81	1324.13	1396.02	1471.09	1490.23	1421.12	1345.93	1369.61	1257.04	1362.12	-0.101081	0.174348	1.07258
Aqp1	935.766	1090.75	1062.62	1033.96	1000	719.243	517.133	574.653	651.74	522.335	450.2	800.993	779.949	-0.0943509	0.842941	1.06759
Aqp11	139.485	138.63	124.819	138.207	140.456	98.639	142.962	103.684	118.819	155.784	150.355	134.381	132.185	0.0930494	0.699918	0.937539
Aqp3	729.925	636.349	679.326	700.536	644.658	789.112	623.913	511.389	455.277	447.879	442.423	541.755	600.212	-0.0300513	0.936038	1.02105
Aqp4	60.9399	73.1657	65.1711	100.2	56.4226	65.7593	87.3655	81.7168	72.9384	59.5645	65.6722	85.7073	72.8853	-0.0166472	0.970859	1.01161
Aqp7	19.6362	36.5828	38.6608	31.9603	39.6159	36.9896	38.8291	39.5404	24.7049	26.3458	47.5259	17.988	33.1983	0.0244787	0.971674	0.983176
Aqp9	13.5422	28.8812	25.4057	26.7776	22.8091	38.3596	25.5919	32.511	21.1757	44.6734	25.9232	25.3948	27.5871	0.320255	0.484019	0.800928
Aqr	4130.37	4207.99	4115.72	4476.17	4303.72	4493.55	3834.37	4062.99	3635.16	4207.32	4139.08	4300.18	4158.89	0.111136	0.0509363	0.925859
Ar	113.755	125.152	101.623	152.027	128.451	130.149	105.015	86.1101	134.113	126.002	129.616	164.008	124.668	0.325084	0.0654654	0.798252
Araf	5429.75	5358.42	5584.83	5580.96	5716.69	5093.61	6122.64	5624.4	6364.46	5872.83	5897.54	6134.95	5731.76	-0.00733399	0.959036	1.0051
Arap1	2844.54	2608.93	3266.29	2814.24	3004.8	2655.03	2380.93	2588.58	2659.9	2634.58	2273.47	2356.42	2673.98	-0.0550207	0.732669	1.03887
Arap2	698.101	620.946	705.836	564.056	480.192	886.381	536.547	477.999	514.098	564.718	530.562	576.673	596.342	0.017588	0.962183	0.987883
Gm42641	578.929	601.691	636.247	1077.15	1246.1	971.32	660.095	694.153	608.212	1265.75	1337.64	1180.86	904.845	0.90661	1.869e-25	0.533437
Gm13285	53.4917	62.5759	74.0079	147.709	108.043	102.749	88.2479	63.2646	64.7034	137.457	119.247	140.729	96.8521	0.9054	2.94595e-07	0.533885
Arcn1	12440.5	15152	13282.8	15540.5	14917.2	13993	11416.6	12570.3	12038.4	13600.2	15402.7	13268.8	13635.3	0.173526	0.057806	0.886673
Arel1	2834.38	2974.76	2924.97	2920.48	3072.03	2818.06	2938.66	2860.09	2814.01	2950.74	2908.59	2692.9	2892.47	0.00140491	0.988098	0.999027
Arf1	18527.8	18472.4	18072.3	19028.5	18715.5	18105.7	17751.1	18274.7	17074.6	18172.9	17630.4	17968.9	18149.6	0.0190242	0.73885	0.9869
Kcnip4	114.432	101.084	125.924	188.307	189.676	138.369	82.9531	69.4153	82.3498	175.257	191.832	193.635	137.769	0.905319	1.71242e-07	0.533915
Arf3	10838.5	10470.4	10774.2	11428	10429.8	11106.5	11192.5	11306.8	10262	11032	10314.9	10466.9	10801.9	-0.00170268	0.985441	1.00118
Arf4	11522.4	13182.3	11421.5	13758.5	12866.8	11183.2	10381.5	11402.6	10514.9	11666.6	12347.2	11514.4	11813.5	0.100113	0.333404	0.93296
Arf5	6026.28	4851.08	5815.69	6192.53	5816.33	5778.6	6172.06	6083.07	5717.43	6589.9	5346.24	6438.63	5902.32	0.0607964	0.612447	0.958735
Arf6	6087.22	5943.75	6043.24	5738.17	5503	5842.99	5694.64	5771.14	4855.11	5296.66	5513.01	5054.61	5611.96	-0.0623988	0.528852	1.0442
Arfgap1	5326.83	4884.77	5465.54	5587.87	5661.47	4704.53	5150.15	5300.17	5462.15	5253.13	4931.46	5396.39	5260.37	-0.002133	0.986773	1.00148
Tmem200a	502.416	450.547	519.16	991.634	929.172	721.983	546.255	463.94	499.981	936.996	906.449	1081.39	712.494	0.902367	6.34412e-21	0.535008
Zdhhc14	262.719	184.84	250.743	402.527	469.388	356.196	213.56	171.342	165.876	467.352	350.828	292.04	298.951	0.901407	1.01926e-07	0.535364
Arfgef1	5963.99	5877.32	6358.05	6394.66	5839.14	6663.61	6214.42	5732.47	6239.76	6399.75	6428.96	6349.75	6205.16	0.0658207	0.267841	0.955402
Nr4a3	54.1688	70.2776	67.3803	142.526	154.862	91.7891	166.789	88.7462	128.23	252.004	152.947	278.284	137.334	0.900221	0.0204033	0.535805
Arfgef3	162.506	123.226	156.852	138.207	127.251	115.079	231.21	144.103	208.227	184.421	221.212	217.972	169.189	-0.0269913	0.957301	1.01889
Arfip1	2051.64	2655.14	2123.03	2390.98	2086.44	2112.52	1890.27	2093.88	2014.04	2059.56	2276.06	1901.43	2137.92	0.000497021	0.998748	0.999656
Arfip2	4391.74	4379.35	4366.46	4898.57	4935.18	3897.61	4302.09	4348.56	4538.65	4684.98	4362.02	4438.79	4462	0.0485104	0.615978	0.966934
Arfrp1	2552.71	2659	2540.57	2894.57	2720.29	2449.53	2496.53	2562.22	2618.72	2757.15	2944.88	2377.58	2631.15	0.0664946	0.471166	0.954955
Arg1	23.6989	12.5152	15.4643	18.1396	14.4058	16.4398	25.5919	19.3308	14.1171	37.8006	26.7873	13.7555	19.8372	0.191575	0.769115	0.875649
Arg2	20.3133	15.4033	25.4057	15.5483	16.8067	17.8098	16.7671	17.5735	10.5878	20.6185	18.1463	17.988	17.7474	0.00107076	0.999012	0.999258
Arglu1	16242.5	17953.5	16851.7	17465.9	16435.8	16642.6	15558.1	14316.2	15908.8	15616.2	17056.6	15145.9	16266.2	0.0227519	0.848729	0.984353
Arhgap1	4154.75	4078.99	4278.1	4440.76	4249.7	3909.94	4028.52	4367.01	4278.66	4301.25	3948.11	4225.05	4188.4	-0.00578904	0.953645	1.00402
Gpr132	33.8555	19.2541	22.0919	64.7844	44.4178	52.0595	22.062	17.5735	21.1757	30.9277	26.7873	37.034	32.6686	0.899175	0.010413	0.536193
Slc44a5	266.781	360.052	378.876	786.051	649.46	453.465	310.633	304.9	316.459	594.5	585.865	531.174	461.518	0.898248	1.70049e-10	0.536538
Arhgap12	1630.48	1859.95	1694.45	1496.95	1631.45	1556.3	1722.6	1855.76	1784.64	1639.17	1922.64	1666.53	1705.08	-0.088373	0.372493	1.06317
Arhgap15	27.7615	34.6574	18.7781	38.8707	38.4154	27.3997	34.4167	28.1176	49.4099	42.3825	31.1079	45.4989	34.7347	0.222539	0.600699	0.857056
Gdf10	352.774	533.339	673.803	993.361	1534.21	535.664	505.661	360.257	432.925	877.431	495.134	878.235	681.067	0.895048	0.00202709	0.537729
Arhgap18	1443.6	1935.04	1730.9	1503	1351.74	1472.73	1350.19	1507.81	1454.06	1242.84	1490.59	1267.62	1479.18	-0.177114	0.172351	1.13062
Ppef1	62.2941	76.0538	48.6022	181.396	105.642	45.2095	79.4231	146.739	114.113	205.039	218.619	219.03	125.18	0.890332	0.0490327	0.53949
Fggy	146.256	139.592	132.551	270.367	276.111	237.008	149.139	161.676	174.111	317.296	290.34	272.994	213.953	0.885564	4.32202e-17	0.541276
Il27ra	29.1157	39.471	38.6608	68.2396	69.6279	39.7296	24.7094	30.7536	30.5871	58.4191	48.3901	68.7775	45.5401	0.881688	0.000330531	0.542732
Arhgap22	297.929	269.558	239.697	241.862	228.091	327.427	302.69	301.385	283.519	300.114	254.912	232.785	273.331	-0.103413	0.57621	1.07431
Arhgap23	3768.8	3378.14	4169.85	3550.19	3719.09	3894.87	4057.64	4327.47	4088.08	4250.85	3443.47	4610.21	3938.22	-0.0197579	0.916327	1.01379
Mmrn1	345.326	317.693	426.374	671.167	620.649	667.183	466.832	338.29	422.337	592.209	748.318	961.826	548.184	0.881203	1.61825e-09	0.542915
Arhgap25	152.35	148.257	145.807	152.027	180.072	154.808	132.372	140.588	127.054	166.093	148.627	149.194	149.771	0.159862	0.283807	0.895111
Arhgap26	522.729	569.922	587.645	449.172	476.591	568.544	427.12	450.76	458.806	478.807	494.27	490.965	497.944	-0.0298211	0.887554	1.02089
Arhgap27	991.289	900.13	1104.6	946.717	983.194	1095.99	983.964	1102.74	1016.43	1036.65	936.693	1217.89	1026.36	0.0268316	0.873751	0.981574
Arhgap28	3609.67	3951.91	3969.91	4068.46	4157.27	4029.13	3815.84	3760.73	4586.88	4260.01	4287.7	4098.08	4049.63	0.0726365	0.396868	0.950899
Arhgap29	4202.15	4136.75	4358.73	3621.88	3906.36	4283.95	3687	4185.13	4310.42	4363.1	4401.77	4263.14	4143.37	-0.00231639	0.98753	1.00161
Cdh13	1046.14	924.198	922.337	1401.07	1558.22	1663.16	1148.11	1201.15	1043.49	2238.25	2089.41	2521.49	1479.75	0.867754	5.66821e-09	0.547999
Arhgap31	5824.5	6052.54	6453.04	4905.48	5216.09	6314.27	5683.17	5775.53	5865.66	5035.49	5172.55	6222.77	5710.09	-0.117729	0.255314	1.08503
Adgre1	52.8146	74.1284	79.5308	142.526	165.666	124.669	77.6582	94.0182	101.173	143.184	137.393	153.427	112.182	0.866895	6.677e-07	0.548326
Arhgap33	4346.37	3330	4185.31	2888.52	3731.09	4041.46	4550.06	4381.07	4339.84	3777.77	3620.61	4854.63	4003.89	-0.133637	0.438479	1.09706
Arhgap35	10863.6	10388.6	11044.8	10694.6	11012	11498.3	10355.9	10561.7	10505.5	10925.5	10792.7	10534.6	10764.8	0.0384013	0.415717	0.973733
Arhgap36	8.12532	14.4406	11.046	15.5483	18.0072	12.3299	22.9445	14.9375	14.1171	20.6185	24.195	23.2785	16.6324	0.427947	0.40623	0.743319
Arhgap39	2824.9	2141.06	2707.36	2679.48	2895.56	2671.47	2868.94	2649.2	2743.43	3020.61	2453.2	3198.68	2737.83	0.0860672	0.526966	0.942087
Arhgap4	465.175	455.36	476.08	505.319	475.39	405.516	519.78	439.337	544.685	507.444	423.413	493.082	475.882	-0.0423692	0.794451	1.0298
Arhgap42	3195.28	3516.77	3619.76	3250.45	2933.98	3245.5	2848.64	3044.61	3278.7	3134.01	3189.42	3180.69	3203.15	-0.0420926	0.702417	1.02961
Arhgap44	511.218	476.54	511.428	495.817	528.212	509.635	496.836	493.815	459.983	571.59	501.183	484.617	503.406	0.0636139	0.532025	0.956864
Arhgap45	259.333	222.385	298.241	214.221	220.888	235.638	330.93	331.26	403.514	323.023	276.515	392.561	292.376	-0.148553	0.629784	1.10846
Arhgap5	3965.16	4597.89	4626.04	3229.72	3092.44	5108.68	3975.57	3626.29	4119.84	3500.56	3747.64	4223.99	3984.49	-0.121454	0.515801	1.08783
Arhgap6	582.315	752.836	827.342	727.313	711.885	754.862	695.394	790.807	861.144	710.192	713.753	720.576	737.368	-0.0529438	0.749049	1.03738
Arhgap8	181.466	151.145	178.944	123.522	115.246	187.688	161.494	176.614	195.287	148.911	106.285	157.659	157.022	-0.323783	0.0924328	1.25161
Arhgap9	44.0122	44.2845	64.0665	63.9206	91.2365	86.3091	49.4188	61.5072	91.7612	74.4557	57.0311	73.0099	66.7511	0.334075	0.289903	0.793293
Arhgdia	19545.5	15848.1	17217.3	20104.8	19007.2	19199	18850.6	18011.1	16927.6	20170.6	16768	20968.7	18551.5	0.127191	0.155805	0.915613
Arhgdib	417.777	387.008	439.629	502.727	390.156	483.605	441.24	418.249	516.451	453.607	433.782	519.534	450.314	0.0902542	0.552677	0.939357
Arhgdig	578.929	490.018	424.164	619.339	600.24	423.326	485.364	402.433	358.81	534.935	442.423	383.038	478.585	0.130899	0.600075	0.913262
Arhgef1	8154.44	6980.58	8046.97	7594.46	7983.2	7589.72	8581.23	8444.06	8226.75	8341.33	7115.07	9063.81	8010.14	-0.0225394	0.875442	1.01575
Arhgef10	2626.51	2362.48	2648.82	2255.36	2683.07	2482.41	2864.53	2875.02	3051.65	2679.26	2454.07	3047.37	2669.21	-0.074634	0.58358	1.05309
Arhgef10l	1156.5	959.818	1121.16	1171.3	1277.31	1135.72	1144.58	1100.1	1124.66	1202.75	975.578	1281.38	1137.57	0.0911736	0.441815	0.938759
Arhgef11	4251.58	4237.83	4304.61	3969.13	4193.28	4178.46	4340.92	4379.32	4449.24	4326.45	4049.21	4381.65	4255.14	-0.0492885	0.320885	1.03475
Arhgef12	10997.6	10223	11293.4	10736.9	10365	12720.3	10541.2	10117.1	10242	11000	10397.8	10729.3	10780.3	0.056251	0.540933	0.96176
Arhgef15	1004.15	1141.77	1241.56	1121.2	1070.83	972.69	1051.03	1085.16	1042.31	1021.76	1061.12	1311	1093.72	0.000270907	0.999031	0.999812
Arhgef16	652.734	556.444	600.9	385.251	454.982	716.503	660.095	596.62	535.274	449.025	476.988	474.035	546.571	-0.289127	0.0944987	1.2219
Arhgef17	11722.8	10625.4	12694	11060.9	12726.3	12577.8	12538.3	12796.1	12527.8	12579.6	10881.7	13938.5	12222.4	0.016815	0.915131	0.988412
Arhgef18	2363.79	2295.09	2384.82	2434.17	2515.01	2372.82	2540.66	2460.29	2476.38	2515.46	2401.36	2581.8	2445.14	0.0296162	0.663115	0.979681
Arhgef19	4877.9	4028.93	5031.43	3733.31	3998.8	5008.67	4846.58	4738.69	4383.36	4251.99	3698.38	4390.12	4415.68	-0.15472	0.173113	1.11321
Arhgef2	5610.54	5201.5	5583.73	5730.4	5361.35	5866.28	5539.32	5564.65	5402.15	5333.32	5047.26	5878.89	5509.95	0.0133282	0.894671	0.990804
Arhgef25	7385.24	7771.93	8505.38	8374.47	8495.8	7341.75	9676.39	9336.8	10069	9152.32	8758.6	9550.54	8701.52	-0.0293492	0.873843	1.02055
Arhgef26	1027.85	1266.92	1279.12	1046.92	1082.83	1056.26	1104.86	1195	1089.37	915.232	1093.96	1189.32	1112.3	-0.123858	0.263696	1.08964
Gemin4	435.382	388.933	679.326	785.187	908.764	712.393	360.052	242.514	521.157	616.264	1061.99	695.181	617.262	0.865364	0.000266133	0.548908
Arhgef3	730.602	803.86	787.576	845.653	789.916	697.323	590.379	615.951	594.095	710.192	716.346	615.823	708.143	0.0863773	0.641144	0.941885
Arhgef33	18.282	23.105	30.9287	35.4155	22.8091	28.7697	21.1795	28.9963	25.8814	21.764	31.1079	34.9178	26.9297	0.260884	0.517473	0.834577
Arhgef37	31.1471	24.0677	26.5103	27.6414	33.6135	34.2496	32.6517	22.8455	16.47	34.3642	22.4668	14.8136	26.7368	0.0962025	0.869494	0.935492
Prss41	163.184	154.033	129.238	221.995	270.108	241.118	142.962	108.077	134.113	245.131	294.661	241.25	195.489	0.861116	2.27387e-11	0.550526
Arhgef4	1019.05	854.883	948.847	1007.18	962.786	1005.57	1021.03	901.52	868.202	951.887	933.237	932.199	950.533	0.0427957	0.694707	0.970772
Arhgef40	13565.9	11695.9	13587.6	12720.2	13467	13280.6	14580.3	13356.7	13631.2	15079	13271.8	15192.4	13619.1	0.0457277	0.683743	0.968801
Arhgef5	3493.89	3599.56	3552.38	2983.54	3079.23	3744.17	3544.92	3671.98	3599.86	3427.25	3694.93	3049.49	3453.43	-0.103666	0.258775	1.0745
Arhgef6	359.546	538.153	451.779	554.555	537.815	335.647	474.774	561.473	570.567	514.317	616.109	890.933	533.806	0.2247	0.449954	0.855773
Arhgef7	5304.48	4622.92	5120.9	4938.3	5273.71	5145.67	5103.38	5100.71	5057.46	5446.72	4699.02	5511.72	5110.42	0.0325691	0.72085	0.977678
Arhgef9	1205.93	1364.15	1317.78	1312.1	1226.89	1356.29	1426.97	1202.91	1532.88	1345.93	1589.96	1527.92	1367.48	0.056149	0.708501	0.961828
Arid1a	16663.7	14750.6	16212.1	15898.1	16737.1	17716.7	16966.5	16424.2	15927.6	17869.4	15693.1	18444	16608.6	0.0781739	0.310908	0.947256
1700109H08Rik	138.808	159.809	165.689	248.772	212.485	339.757	157.964	121.257	159.994	264.604	294.661	272.994	211.399	0.856608	3.66593e-10	0.552249
Arid2	8223.5	7541.84	8758.33	7528.82	6817.53	9837.87	8154.99	7202.5	8142.04	7885.43	7161.73	8870.18	8010.4	0.00217612	0.991865	0.998493
Arid3a	1021.76	1078.23	1067.04	1115.16	1103.24	1091.88	1016.62	1057.05	967.022	1116.83	1074.95	1064.46	1064.52	0.0804516	0.17876	0.945762
Arid3b	510.541	476.54	453.989	500.136	477.791	480.865	419.178	454.275	405.867	575.027	485.629	454.989	474.569	0.125617	0.287031	0.916612
Arid4a	2029.98	2467.42	2151.75	2092.11	2156.06	2052.24	2243.26	2237.98	2158.74	2164.94	2397.04	2237.91	2199.12	-0.0195698	0.870767	1.01366
Arid4b	3719.37	3815.21	4134.5	3866.34	3555.82	4768.92	4036.46	3610.47	3836.33	4108.81	4198.7	4390.12	4003.42	0.104216	0.299833	0.93031
Arid5a	486.165	392.784	438.524	536.415	512.605	337.017	410.353	412.098	368.221	420.388	377.615	353.41	420.466	0.0167532	0.956921	0.988455
Tmem252	541.688	645.976	722.405	908.71	1087.64	794.592	367.111	470.091	296.459	987.397	1141.49	589.37	712.743	0.856083	0.0003793	0.55245
Arih1	7772.55	8622	7961.92	8022.9	7693.88	8122.65	7609.62	7736.73	7679.71	7766.3	8368.89	7453.36	7900.88	0.00156928	0.988098	0.998913
Arih2	3773.54	3889.33	3607.61	3896.57	3846.34	3530.45	3676.41	3675.5	3638.69	3699.87	3681.1	3433.58	3695.75	-0.0111008	0.90114	1.00772
Arl1	5784.55	7477.34	6152.59	6452.53	6115.25	5766.27	5731.7	6257.04	5750.37	5575.01	6670.05	5314.91	6087.3	-0.0494905	0.733472	1.0349
Arl10	717.737	584.363	648.397	592.562	716.687	630.194	689.216	694.153	724.678	719.356	616.973	717.402	670.977	-0.0255756	0.878446	1.01789
Arl11	14.8964	19.2541	18.7781	19.0034	13.2053	8.21992	13.2372	19.3308	14.1171	17.1821	12.0975	14.8136	15.3446	-0.217173	0.696808	1.16245
Arl13b	1579.7	1949.48	1885.54	1560.87	1572.63	1746.73	1672.3	1752.96	1706.99	1541.8	1829.32	1589.29	1698.97	-0.0990866	0.320974	1.0711
Arl14ep	2931.21	3783.44	3430.87	3006	3159.67	3053.7	3059.56	3080.63	3426.93	2966.77	3333.73	2994.47	3185.58	-0.0896187	0.368536	1.06409
Angptl4	861.284	1033.95	1350.92	1965.99	2194.48	2001.55	1291.95	1278.47	1448.18	2215.34	2290.75	2460.12	1699.42	0.855144	3.15096e-12	0.55281
Arl16	737.373	794.233	720.196	776.549	770.709	778.152	839.238	789.05	796.44	815.576	859.788	796.761	789.505	0.0384702	0.703913	0.973687
Arl2	2032.69	1721.32	1868.97	1991.04	1873.95	2000.18	2104.71	1884.76	1995.22	2061.85	1729.08	2056.98	1943.4	0.0120965	0.934184	0.99165
Arl2bp	4164.23	4013.52	4232.81	4046.87	4024.01	4057.9	4279.14	4324.84	4351.6	4207.32	4144.26	4033.53	4156.67	-0.0488441	0.261298	1.03444
Tmem59l	173.34	127.077	171.212	278.141	332.533	182.208	171.201	102.805	95.2905	284.077	222.94	222.204	196.919	0.853325	0.000108538	0.553507
Arl4a	807.793	1019.51	831.76	1091.83	1096.04	915.151	968.962	1081.65	1124.66	1123.71	1278.88	1253.87	1049.48	0.214336	0.126585	0.861943
Ctsh	93.4412	127.077	109.355	181.396	201.681	176.728	90.8954	100.169	70.5856	182.13	146.034	183.054	138.546	0.852263	2.79285e-08	0.553915
Arl4d	262.042	197.355	203.245	208.174	219.688	139.739	173.848	224.941	209.404	146.62	138.257	175.647	191.58	-0.30687	0.135556	1.23702
Arl5c	117.817	127.077	180.049	314.42	289.316	291.807	155.316	148.496	190.581	203.894	290.34	257.122	213.853	0.849524	9.43569e-08	0.554968
Arl5b	5141.3	4694.16	5366.12	4826.87	3774.31	5297.74	4975.42	4282.66	5022.16	4699.87	4444.97	4418.69	4745.36	-0.102411	0.404142	1.07357
Serpinb6b	287.772	300.364	231.965	412.029	486.195	563.064	276.216	304.9	259.99	494.844	579.817	461.338	388.208	0.84725	1.05196e-14	0.555843
Cfap157	44.0122	33.6947	32.0333	71.6948	84.0337	64.3893	45.8889	29.8749	45.8806	84.7649	58.7593	53.9639	54.0825	0.845576	0.000207308	0.556489
Slc2a9	139.485	137.667	129.238	282.46	231.693	290.437	141.197	161.676	115.29	237.113	258.368	181.996	192.218	0.841635	2.83617e-09	0.558011
Arl6ip4	2445.05	2230.59	2303.08	2416.03	2528.21	2312.54	2523.01	2465.56	2235.21	2458.18	2514.55	2429.43	2405.12	0.0449133	0.542532	0.969348
Arl6ip5	2308.27	2360.56	2446.68	2465.26	2250.9	2134.44	2334.16	2433.93	2458.73	2137.45	2000.41	2217.81	2295.72	-0.118115	0.0811658	1.08532
Arl6ip6	1878.3	2291.24	1922	1964.26	1989.2	1874.14	1727.89	1991.08	1726.99	2034.36	2010.78	1947.99	1946.52	0.0350667	0.792822	0.975987
Arl8a	2945.43	2850.57	2684.17	2874.7	2965.19	2867.38	2858.35	2879.42	2772.84	2808.7	2619.98	2786.02	2826.06	-0.00765768	0.933951	1.00532
Arl8b	4361.27	4801.02	4317.86	4509.86	4418.97	4583.97	4077.94	4166.68	4037.49	4203.88	4807.9	3924.55	4350.95	0.0379998	0.729262	0.974004
Nrg1	49.4291	34.6574	60.7527	57.8741	64.826	89.0491	52.0663	55.3565	47.057	137.457	112.334	74.068	69.5772	0.839038	0.00335499	0.559016
Armc10	3569.73	3746.85	3610.92	3636.57	3115.25	3686.63	3412.55	3579.72	3626.92	3266.89	3602.47	3224.08	3506.55	-0.0691492	0.377318	1.0491
Armc2	157.09	183.877	176.735	190.034	214.886	146.588	227.68	182.764	205.875	230.24	207.386	204.216	193.948	0.0788641	0.736923	0.946803
Armc5	1804.5	1520.11	1755.2	1674.89	1931.57	1657.68	1800.26	1835.55	1784.64	1927.83	1551.07	2068.61	1775.99	0.041501	0.785156	0.971643
Armc6	1264.84	1143.7	1147.67	1348.38	1372.15	1216.55	1246.94	1252.99	1031.73	1336.77	1229.63	1358.62	1245.83	0.147544	0.0694159	0.902786
Armc7	359.546	383.157	326.96	404.255	364.946	347.976	436.827	387.496	411.749	423.825	354.284	410.549	384.297	0.00129417	0.995944	0.999103
Armc8	1797.05	1980.29	1692.24	1801.01	1829.53	1774.13	1683.77	1825.01	1731.7	1807.55	1958.93	1717.32	1799.88	0.024081	0.817957	0.983447
Armc9	1076.61	1069.57	1036.11	1244.72	1238.9	1039.82	1224.88	1122.07	1208.19	1341.35	1195.06	1190.38	1165.64	0.107124	0.285035	0.928437
Aldh3b2	52.1375	23.105	43.0792	52.6913	69.6279	78.0892	26.4744	33.3896	29.4106	84.7649	40.6131	49.7314	48.5928	0.837631	0.00999142	0.559562
Kcnt1	65.6797	31.7693	44.1838	60.4655	112.845	75.3492	56.4787	34.2683	42.3513	79.0375	89.8672	77.2424	64.1282	0.83603	0.00167513	0.560183
Armcx3	3068.66	4137.71	3480.58	3510.45	3480.19	2968.76	3146.04	3358.3	3470.46	3075.59	3530.75	3046.31	3356.15	-0.0744312	0.576272	1.05295
Armcx4	7383.89	6687.92	8127.61	7838.05	8116.45	8171.97	7224.86	6884.42	7816.17	7593.33	7618.84	8400.37	7655.32	0.11371	0.114948	0.924208
Armcx5	619.556	778.829	716.882	678.941	698.68	756.232	617.736	637.918	691.738	789.23	866.7	677.194	710.803	0.138969	0.266971	0.908168
Palmd	520.021	609.393	542.356	1040.01	881.153	1034.34	335.342	420.007	454.1	761.739	746.589	679.31	668.696	0.835872	4.63085e-07	0.560244
Fxyd1	220.738	231.05	235.279	435.351	464.586	379.486	239.152	270.632	337.634	483.389	407.859	559.743	355.408	0.835585	7.0672e-10	0.560356
Hpcal4	72.4508	50.0607	37.5562	133.024	116.447	61.6494	41.4765	43.9337	41.1749	75.6011	82.9544	42.3246	66.5544	0.832358	0.0177465	0.561611
Rasef	23.6989	19.2541	8.83676	40.5982	31.2125	32.8797	25.5919	16.6948	21.1757	43.5279	30.2438	28.5691	26.8569	0.830527	0.0115954	0.562324
Zfp663	34.5326	27.9185	25.4057	56.1465	54.0216	38.3596	24.7094	16.6948	28.2342	45.8189	47.5259	38.0921	36.455	0.829484	0.001915	0.56273
Trpv2	80.5761	60.6505	56.3343	128.705	142.857	94.529	75.8932	64.1433	57.6449	106.529	105.421	126.974	91.6881	0.825077	2.13754e-06	0.564452
Arpc1a	5476.47	5092.72	5315.31	5400.43	5264.11	5086.76	5304.58	5656.91	5529.2	5170.66	4927.14	4912.83	5261.43	-0.0738128	0.161181	1.05249
Arpc1b	3869.01	3373.32	3935.67	3867.2	3750.3	3463.32	3836.14	3969.85	3624.57	3727.36	3307.81	4034.59	3729.93	-0.029657	0.801724	1.02077
Arpc2	9763.25	10925.8	9630.96	10454.5	9716.69	9520.03	9242.21	9507.26	8558.5	9714.75	9942.43	8687.12	9638.62	0.0101729	0.944377	0.992973
Tceanc2	614.139	656.566	701.418	1117.75	1196.88	1200.11	693.629	750.388	787.029	1326.46	1291.84	1285.61	968.484	0.82222	4.09306e-29	0.565571
Arpc4	4856.23	4260.94	4461.46	4949.53	4332.54	4677.13	4388.57	4243.12	4338.66	4588.76	4001.68	4504.4	4466.92	0.0267381	0.810924	0.981637
Arpc5	4928.01	5597.17	4832.6	4904.61	4698.68	4688.09	4344.45	4686.85	4601	4389.45	4873.57	4181.67	4727.18	-0.0636649	0.556499	1.04512
Arpc5l	3096.43	3180.78	2943.75	3237.49	3198.08	3066.03	2951.01	2915.44	2792.84	3044.66	3382.98	2679.15	3040.72	0.0576267	0.552941	0.960843
Arpin	1058.32	1100.37	1104.6	1097.02	1109.24	1076.81	1102.22	1119.43	1142.31	1083.62	1088.78	1088.8	1097.63	-0.0159681	0.84185	1.01113
Arpp19	7324.3	7909.6	7135.68	7237.72	7102.04	7534.92	7099.55	6885.3	6880.92	7221.05	8057.81	6984.62	7281.13	0.02985	0.738616	0.979522
Arpp21	56.2002	11.5525	6.62757	24.1862	52.8212	2.73997	38.8291	12.3014	14.1171	18.3275	21.6027	19.0461	23.196	-0.0194372	0.989557	1.01356
Arrb1	3187.84	3133.61	3547.96	2708.85	2623.05	3459.21	3007.49	3211.56	3529.28	2523.47	2935.38	3528.81	3116.38	-0.142009	0.284808	1.10344
Arrb2	1486.26	1248.63	1496.73	1455.49	1436.98	1368.62	1671.42	1693.21	1779.93	1576.17	1462.93	1484.54	1513.41	-0.0933352	0.470664	1.06683
Arrdc1	1024.47	927.086	1033.9	956.218	893.158	997.35	1123.4	1116.8	1134.07	1017.18	900.401	1009.44	1011.12	-0.139831	0.106269	1.10178
Arrdc2	194.331	177.138	166.794	199.536	194.478	167.138	209.148	221.426	192.934	257.731	206.522	179.88	197.255	0.0525791	0.82786	0.964211
Sema4f	318.242	264.744	278.358	513.093	588.236	417.846	329.165	260.966	261.167	554.408	502.911	456.048	395.432	0.821817	4.96153e-14	0.565729
Arrdc4	1077.28	1237.08	1239.36	1042.6	1064.83	865.831	1262.83	1318.01	1549.35	1241.69	1244.32	1101.5	1187.06	-0.225807	0.0951724	1.16943
Arsa	1226.25	1074.38	1290.17	998.544	1134.45	1131.61	1346.66	1312.74	1456.42	1216.49	1039.52	1491.94	1226.6	-0.136248	0.380378	1.09904
Foxe1	373.765	230.087	350.157	311.829	468.188	635.673	467.714	456.032	251.755	1080.18	723.258	548.104	491.395	0.821651	0.00839706	0.565794
Arsg	132.037	126.115	134.761	203.855	165.666	105.489	137.667	143.224	135.289	166.093	194.424	180.938	152.13	0.338434	0.0683968	0.790899
Arsi	360.223	333.096	428.583	320.467	428.572	635.673	303.573	338.29	407.043	318.441	271.33	398.909	378.683	0.126134	0.703405	0.916284
Rpl34	10610.3	10578.2	10051.8	18976.7	18535.4	16790.5	10304.7	10920.2	10569	19155.7	20475.9	17454.7	14535.3	0.82153	4.98346e-61	0.565842
Spsb4	251.208	209.87	178.944	403.391	424.97	260.297	226.797	173.978	154.112	416.952	321.448	283.575	275.462	0.817199	5.14587e-06	0.567543
Art1	13.5422	19.2541	3.31379	8.63792	12.0048	10.9599	13.2372	7.0294	16.47	5.72736	14.6898	14.8136	11.64	-0.122654	0.899362	1.08874
Art3	35.8868	28.8812	35.347	27.6414	13.2053	38.3596	84.718	93.1395	85.8791	40.0915	51.8465	48.6733	48.6391	-0.722588	0.174553	1.65014
Cacfd1	3373.36	3092.21	3274.02	6291.86	6208.89	5742.98	3543.15	3501.52	3439.87	6407.77	5390.31	5594.25	4655.02	0.817053	2.7564e-47	0.5676
Art5	18.282	19.2541	12.1505	12.9569	12.0048	12.3299	19.4145	14.0588	18.8228	12.6002	12.9616	10.5811	14.6181	-0.475244	0.284808	1.39015
Artn	138.13	117.45	111.564	82.9241	116.447	180.838	159.729	188.915	197.64	254.295	212.571	184.112	162.051	0.174377	0.700624	0.88615
Arv1	562.679	520.824	573.285	633.16	656.663	582.244	515.368	470.091	502.334	595.645	597.963	502.605	559.405	0.182224	0.0771065	0.881343
Serping1	187.56	241.639	265.103	364.52	415.366	354.826	151.786	144.981	196.463	323.023	292.933	337.539	272.978	0.816878	1.83697e-06	0.567669
Chsy3	272.875	330.208	338.006	692.762	690.277	465.795	288.571	283.812	331.752	399.77	391.441	601.009	423.856	0.814661	3.27039e-06	0.568542
Ncam2	66.3568	52.9489	48.6022	55.2827	90.0361	87.6791	43.2415	33.3896	35.2928	95.0742	74.3133	95.2303	64.7873	0.813907	0.0013418	0.568839
Fxyd2	34.5326	24.0677	32.0333	53.5551	44.4178	42.4696	39.7116	29.8749	18.8228	68.7283	49.2542	58.1963	41.3053	0.810853	0.00205992	0.570045
Asah1	2299.47	2816.88	2466.56	2483.4	2406.96	2172.8	2315.63	2503.34	2483.44	2418.09	2681.33	2426.26	2456.18	-0.0275645	0.82816	1.01929
Asah2	368.348	529.489	480.499	355.019	410.564	450.725	450.064	453.396	469.394	356.242	432.054	411.607	430.617	-0.186094	0.176944	1.13768
Asap1	7053.46	6768.79	7400.79	6484.49	6261.71	7148.59	6874.51	7232.37	8333.8	6261.15	6286.39	7329.56	6952.97	-0.134579	0.115689	1.09777
Asap2	3831.09	3630.37	3687.14	3743.68	3827.13	3863.36	3856.43	3787.97	3212.82	4144.32	4163.27	3856.83	3800.37	0.100158	0.166204	0.932931
Asap3	819.981	803.86	958.788	595.153	725.09	728.833	1177.23	1186.21	1385.83	1013.74	917.683	1155.46	955.655	-0.301437	0.220567	1.23237
Asb1	1690.74	1857.06	1724.27	1895.16	2058.82	1759.06	1669.65	1425.21	1674.05	1791.52	1694.52	1582.94	1735.25	0.102738	0.374329	0.931264
Asb13	898.525	1002.18	924.546	836.151	837.936	790.482	908.954	927.002	952.905	947.305	968.665	805.225	899.989	-0.111933	0.221366	1.08068
Asb14	17.6049	27.9185	18.7781	24.1862	19.2077	16.4398	18.5321	15.8161	17.6464	16.0366	27.6515	20.1042	19.9935	0.111131	0.847188	0.925862
Asb16	43.3351	47.1726	59.6481	65.6482	73.2293	53.4295	47.6539	55.3565	39.9985	61.8555	57.0311	32.8016	53.0967	0.232502	0.485488	0.851157
Asb18	81.9303	105.898	76.2171	61.3293	63.6255	89.0491	91.7779	74.6874	81.1734	67.5828	71.721	81.4748	78.8722	-0.242721	0.28157	1.18322
Asb2	18.282	18.2914	14.3597	12.0931	22.8091	9.5899	9.70727	11.4228	3.52928	16.0366	12.0975	10.5811	13.2333	0.114477	0.898404	0.923717
Asb3	819.981	1054.16	910.186	867.248	846.339	817.882	809.234	857.587	891.731	812.139	968.665	776.656	869.318	-0.0676428	0.621415	1.048
Asb4	723.154	811.561	753.334	680.668	689.076	564.434	968.08	1013.99	968.199	1372.28	1312.58	1169.22	918.881	0.144748	0.699983	0.904537
Asb5	14.2193	11.5525	11.046	12.0931	12.0048	17.8098	15.0021	16.6948	7.05856	9.16377	12.9616	17.988	13.1329	0.0890922	0.907151	0.940114
Asb6	1910.13	1585.58	1762.93	1862.34	1930.37	1856.33	1957.34	1849.61	1743.46	1975.94	1693.65	1943.76	1839.29	0.0577095	0.572962	0.960788
Asb7	1259.43	1304.47	1280.23	1268.91	1262.91	1341.22	1274.3	1223.12	1228.19	1248.56	1435.28	1234.82	1280.12	0.0424151	0.612389	0.971028
Rxfp3	157.09	167.511	139.179	272.095	342.137	167.138	302.69	162.555	238.814	383.733	476.124	402.084	267.596	0.809078	0.00626396	0.570747
Ascc1	1147.02	1054.16	1117.85	1061.6	1045.62	1137.09	1187.82	1175.67	1229.37	1160.36	1095.69	1072.93	1123.76	-0.0730357	0.335718	1.05193
Hbb-bh1	48.0748	66.4267	72.9033	132.16	100.84	83.5691	47.6539	36.9043	35.2928	74.4557	91.5955	51.8476	70.1437	0.804314	0.0094145	0.572634
Ascc3	2169.46	1832.99	2214.71	2248.45	1768.31	2474.19	2020.88	1700.24	1964.63	1991.98	1989.18	2236.85	2050.99	0.0942802	0.51901	0.936739
Ascl1	56.2002	9.62706	17.6735	8.63792	18.0072	13.6999	29.1218	10.5441	15.2935	22.9094	25.9232	24.3366	20.9979	-0.301576	0.7297	1.23249
Ascl2	12.188	10.5898	11.046	16.4121	13.2053	15.0698	16.7671	12.3014	10.5878	24.0549	17.2822	16.9298	14.7028	0.480035	0.290448	0.71696
Ascl4	133.391	118.413	125.924	119.203	92.437	93.159	54.7137	75.566	94.1141	68.7283	83.8185	59.2544	93.2268	-0.219712	0.592807	1.1645
Ascl5	391.37	241.639	329.169	470.767	392.557	368.526	292.101	243.393	203.522	411.224	247.999	227.495	318.314	0.314102	0.287916	0.804351
Asf1a	1608.14	1846.47	1732.01	1607.52	1540.22	1657.68	1592.88	1684.42	1536.41	1576.17	1684.15	1473.95	1628.33	-0.0677392	0.440102	1.04807
Asf1b	1456.46	1497.97	1430.45	1424.39	1456.18	1663.16	1367.84	1390.06	1242.31	1328.75	1365.29	1473.95	1424.74	0.0528199	0.641149	0.96405
Asgr1	7.44821	13.4779	12.1505	10.3655	10.8043	8.21992	11.4722	8.78675	14.1171	11.4547	19.0104	10.5811	11.4907	0.104867	0.896484	0.929891
Ash1l	6647.87	6407.77	6907.03	6580.37	6362.55	8024.01	6810.09	6276.37	6913.86	6817.85	6667.46	7486.16	6825.12	0.0693836	0.471047	0.953045
Ash2l	5848.88	6341.35	5925.05	5817.64	5528.21	6215.63	5456.37	5439.88	5303.33	5427.25	5694.47	5478.92	5706.41	-0.00668697	0.959792	1.00465
Asic1	494.968	421.665	435.21	350.7	476.591	395.926	473.009	502.602	541.156	457.043	411.315	430.653	449.237	-0.187802	0.133175	1.13903
Asic2	18.282	12.5152	9.94136	19.0034	27.6111	12.3299	38.8291	13.1801	12.9407	49.2553	53.5747	30.6853	24.8457	0.861113	0.151182	0.550528
Asic3	60.9399	74.1284	68.4849	52.6913	64.826	67.1293	154.434	123.014	151.759	108.82	87.2749	140.729	96.1859	-0.276946	0.592807	1.21163
Pls1	66.3568	84.7182	85.0538	173.622	134.454	97.269	106.78	96.6542	82.3498	169.53	191.832	138.613	118.936	0.803464	8.48846e-05	0.572972
Asna1	3094.39	2681.14	2865.32	2899.75	3013.21	2841.35	3106.33	3143.9	2836.36	2966.77	2721.94	2819.88	2915.86	-0.0394844	0.652367	1.02775
Asns	2197.9	2326.86	2191.52	2267.46	2124.85	2212.53	1680.24	1752.08	1617.59	1730.81	1818.08	1806.2	1977.18	0.0231603	0.927455	0.984075
Asnsd1	3160.75	3849.86	3380.06	3139.89	3018.01	3153.71	3067.5	3346.87	3099.88	2823.59	3471.12	2758.51	3189.15	-0.115781	0.269437	1.08356
Aspa	16.2506	19.2541	17.6735	14.6845	9.60385	21.9198	19.4145	14.9375	30.5871	18.3275	32.8361	20.1042	19.6328	0.0154985	0.984677	0.989315
Aspdh	24.376	8.66436	8.83676	12.9569	8.40337	6.84993	24.7094	15.8161	14.1171	34.3642	23.3309	20.1042	16.8774	0.129369	0.896487	0.914231
Prrt4	81.2532	64.5013	57.4389	77.7413	87.6351	65.7593	65.3035	79.0807	50.5863	225.658	133.073	105.811	91.1535	0.801305	0.0227504	0.57383
Dmrta2	183.497	94.3452	104.937	148.572	216.087	228.788	165.024	181.886	105.878	371.133	275.65	221.146	191.412	0.800981	0.00444394	0.573959
Asphd1	32.5013	12.5152	19.8827	32.8241	36.0144	16.4398	30.8868	27.2389	21.1757	27.4913	38.0208	25.3948	26.6988	0.286403	0.563386	0.819944
Asphd2	1008.22	634.424	827.342	754.091	859.544	767.192	1037.8	1045.62	983.492	1114.54	871.021	1147	920.857	-0.00660824	0.984677	1.00459
Adra1d	25.7302	16.366	33.1379	75.1499	62.425	28.7697	30.8868	31.6323	25.8814	36.6551	25.0591	55.022	37.2263	0.795834	0.0487089	0.57601
Pde3a	815.918	878.951	956.579	1655.89	1340.94	1531.64	647.74	607.164	715.267	1209.62	1134.57	1149.11	1053.62	0.795786	2.55978e-08	0.576029
Efhd1	44.0122	79.9046	56.3343	122.659	104.442	61.6494	43.2415	41.2977	32.9399	80.183	79.4979	66.6612	67.7352	0.795701	0.00802621	0.576063
Aspscr1	2893.29	2450.09	2648.82	2600.88	2793.52	2634.48	2850.41	2662.38	2726.96	2827.02	2615.66	2757.45	2705.08	-0.00131871	0.990725	1.00091
Asrgl1	686.59	744.172	642.874	836.151	812.726	686.363	723.633	673.944	723.502	717.065	774.241	709.995	727.605	0.115477	0.225316	0.923077
Ass1	636.484	552.593	649.502	634.024	559.424	800.072	646.857	751.267	644.681	508.589	557.35	749.145	640.832	-0.0288173	0.91331	1.02018
Lrrtm3	166.569	182.914	133.656	330.833	265.306	168.508	285.923	221.426	157.641	485.68	429.462	311.086	261.584	0.794437	0.00619877	0.576568
Rims1	106.983	75.0911	61.8573	167.576	171.669	130.149	139.432	126.529	175.287	235.967	224.668	256.064	155.939	0.794088	0.00788262	0.576708
Nanos3	35.2097	22.1422	37.5562	61.3293	56.4226	49.3195	35.2992	42.1764	41.1749	84.7649	63.944	52.9057	48.5204	0.793337	0.00123954	0.577008
Asxl1	8433.41	8531.5	8301.03	7208.35	7465.79	8371.98	8087.92	8350.93	7656.18	7750.26	8024.11	7944.33	8010.48	-0.0784429	0.209983	1.05588
Asxl2	3072.05	3143.24	3131.53	3321.28	2979.59	3497.57	3116.92	2751.13	3125.76	3293.23	3313.85	3366.92	3176.09	0.108708	0.0963187	0.927418
Asxl3	2023.21	1671.26	2280.99	1940.94	1630.25	2427.62	1987.34	1752.08	2246.97	1875.14	1770.56	2351.13	1996.46	0.0040096	0.988254	0.997225
Atad1	3623.89	4163.71	3519.24	3883.61	3695.08	3619.5	3222.81	3471.64	3265.76	3593.34	3855.65	3276.98	3599.27	0.0440035	0.72523	0.96996
Atad2	6920.07	6757.24	6958.95	6289.27	6260.51	7713.02	6135	5511.05	5418.62	6194.71	6489.45	6994.14	6470.17	0.0829614	0.539288	0.944118
Atad2b	3332.74	3055.63	3589.93	3378.29	2879.95	4030.5	3405.49	2797.7	3443.4	3476.51	3262.87	3771.12	3368.68	0.0837608	0.555156	0.943595
Nme6	526.115	443.808	455.093	783.46	857.143	795.962	429.767	446.367	463.512	804.121	769.056	790.412	630.401	0.791678	5.76521e-34	0.577672
Atad5	3437.01	3444.56	3344.71	3575.24	3109.25	3563.33	3043.67	2780.13	2819.89	3199.3	3493.59	3323.54	3261.19	0.102715	0.317441	0.931279
Atat1	2725.37	2265.25	2508.54	2558.55	2731.09	2435.83	2729.51	2575.4	2814.01	2862.53	2728.85	2696.08	2635.92	0.0361663	0.74954	0.975243
Cdh10	339.909	398.56	353.47	686.715	714.286	591.834	435.062	511.389	507.04	770.902	858.923	772.424	578.376	0.790668	3.06356e-09	0.578076
Ate1	2036.07	2174.75	2030.25	1926.26	2038.42	1960.45	2038.53	2014.8	2042.28	1915.23	2218.17	1878.15	2022.78	-0.0467263	0.562261	1.03292
Atf1	3096.43	3638.07	3264.08	3066.46	3140.46	3448.25	3261.64	3468.13	3116.35	3075.59	3312.13	2946.85	3236.2	-0.0638694	0.467119	1.04527
Atf2	4074.85	4754.81	4497.91	3881.88	3833.14	4548.35	4214.72	4216.76	4304.54	4044.66	4182.28	4110.78	4222.06	-0.0833851	0.28879	1.0595
Dusp27	51.4604	57.7624	71.7987	124.386	93.6375	75.3492	37.9466	68.5366	50.5863	91.6377	75.1774	120.625	76.5753	0.788089	0.000948573	0.579111
Atf4	7171.28	7693.95	6950.11	7094.33	7020.41	6525.24	6847.16	7383.5	6284.47	6851.07	6851.51	6434.4	6925.62	-0.0540687	0.517837	1.03819
Sgpp2	47.3977	38.5083	58.5435	99.3361	70.8284	57.5394	27.3569	35.147	30.5871	66.4374	76.9056	37.034	53.8018	0.786305	0.0157337	0.579827
Crabp1	1034.62	781.718	1006.29	1933.17	1726.29	1135.72	582.436	572.017	484.687	1101.94	730.171	1063.41	1012.71	0.785237	0.0260598	0.580257
Atf6b	5112.18	4534.35	4831.5	5231.99	5367.35	4951.13	5281.64	5242.17	4663.35	5404.34	4499.41	5368.87	5040.69	0.0547074	0.587192	0.96279
Atf7	4593.52	5008.96	5260.08	4977.17	4948.38	5088.13	5075.14	4907.4	5649.2	5376.84	5526.84	5615.42	5168.92	0.0491001	0.610173	0.966539
Atf7ip	7126.59	7426.32	7581.94	6450.8	6507.81	7180.1	7552.26	7569.78	7660.89	6983.94	7156.54	7626.89	7235.32	-0.100027	0.102241	1.07179
Atf7ip2	102.244	116.487	76.2171	56.1465	88.8356	71.2393	79.4231	98.4116	68.2327	77.8921	80.362	71.9518	82.2869	-0.287891	0.255168	1.22085
Atg10	274.907	382.194	286.09	298.872	262.905	273.997	255.919	312.808	337.634	266.895	328.361	306.853	298.953	-0.0842294	0.670597	1.06012
Galnt16	455.018	517.936	573.285	963.992	1057.62	769.932	533.018	481.514	454.1	812.139	755.23	817.923	682.643	0.780928	1.95239e-13	0.581992
Ncoa7	699.455	823.114	733.451	1353.56	1169.27	1161.75	662.742	703.819	694.091	1245.13	1360.11	1101.5	975.665	0.778036	5.03466e-24	0.58316
Mocos	29.7929	25.0304	22.0919	31.9603	64.826	67.1293	37.9466	19.3308	22.3521	49.2553	27.6515	31.7434	35.7592	0.777279	0.042396	0.583466
Zdhhc23	66.3568	27.9185	37.5562	66.512	74.4298	75.3492	32.6517	31.6323	21.1757	63.0009	52.7106	45.4989	49.5661	0.774277	0.0228083	0.584681
Atg16l1	2663.07	2490.52	2613.47	2543.87	2600.24	2349.53	2537.13	2474.35	2444.61	2538.37	2584.55	2408.27	2520.66	-0.0186993	0.813496	1.01305
Tmem200c	52.1375	65.464	65.1711	121.795	94.838	82.1992	36.1817	41.2977	50.5863	90.4923	61.3517	78.3005	69.9846	0.772893	0.0021883	0.585243
Atg2a	2438.95	2022.65	2641.09	2388.39	2494.6	2508.44	2766.57	2648.33	2706.96	2919.81	2319.27	3155.3	2584.2	0.0521724	0.773958	0.964483
Cep250	5025.51	4179.11	5052.42	7511.54	8960.39	8271.97	5169.56	5122.67	5124.51	8502.84	8321.36	9119.89	6696.82	0.772317	1.11884e-31	0.585477
Atg3	1150.41	1290.03	1080.29	1220.54	1238.9	980.91	1090.74	1136.13	1051.72	1072.16	1205.43	1096.21	1134.46	0.00415826	0.981656	0.997122
Atg4a	599.243	675.82	670.489	645.253	591.837	571.284	608.911	599.256	567.037	607.1	652.402	550.22	611.571	-0.0370664	0.778712	1.02603
Atg4b	3716.66	3676.58	3667.26	3929.39	3780.31	3757.87	3598.75	3684.28	3616.33	3886.59	3865.16	3649.44	3735.72	0.0588537	0.125503	0.960027
Atg4c	726.539	973.296	818.505	818.875	842.738	856.241	758.932	754.782	829.38	831.612	941.014	789.354	828.439	0.065466	0.633521	0.955637
Atg4d	1484.9	1206.27	1336.56	1280.14	1394.96	1298.75	1436.68	1450.69	1295.24	1372.28	1329.86	1236.94	1343.61	-0.0552336	0.595409	1.03903
Atg5	1646.73	2064.04	1632.59	1598.88	1655.46	1660.42	1581.4	1679.15	1458.77	1630.01	1770.56	1398.83	1648.07	-0.0510983	0.741625	1.03605
Atg7	1940.6	1798.34	1751.89	1759.55	1733.49	1661.79	1721.72	1846.97	1647	1837.34	1586.5	1645.37	1744.21	-0.0683051	0.411629	1.04848
Atg9a	2359.05	1966.81	2443.36	2403.07	2509.01	2282.4	2611.26	2434.81	2723.43	2656.35	2232.86	2988.12	2467.54	0.0521413	0.756047	0.964504
Atg9b	37.9182	37.5455	29.8241	29.3689	36.0144	21.9198	33.5342	26.3602	30.5871	35.5096	32.8361	12.6974	30.343	-0.218585	0.63256	1.16359
Riox2	788.156	855.846	754.438	1327.65	1349.34	1232.99	728.928	695.91	749.383	1349.37	1335.91	1208.37	1031.36	0.771489	2.48511e-36	0.585812
Atl1	222.092	190.616	181.154	151.164	222.089	164.398	201.205	179.25	204.698	159.221	169.365	152.369	183.135	-0.217018	0.181684	1.16233
Ccdc7b	20.9904	10.5898	18.7781	42.3258	28.8115	58.9094	26.4744	26.3602	24.7049	32.0732	31.1079	26.4529	28.9649	0.770848	0.0391976	0.586073
Atl3	4798	5056.13	5488.73	5276.91	5145.26	5969.03	5229.57	4487.39	5908.01	5129.42	5520.79	6100.03	5342.44	0.0981912	0.37781	0.934204
Atm	1616.94	1273.66	1737.53	1625.66	1398.56	1972.78	1660.83	1312.74	1623.47	1694.15	1610.7	1936.35	1621.95	0.15014	0.328948	0.901163
Tfeb	283.709	200.243	266.207	501	469.388	358.936	315.928	252.18	208.227	477.662	385.392	414.781	344.471	0.770003	5.66374e-08	0.586416
Atn1	7898.49	6564.69	7828.27	6930.21	7879.96	7563.69	8657.12	8406.28	8518.5	7666.64	7186.79	8272.34	7781.08	-0.0735005	0.523747	1.05227
Acmsd	34.5326	33.6947	34.2424	55.2827	48.0192	45.2095	35.2992	25.4816	34.1164	53.8372	63.944	67.7194	44.2816	0.769838	0.000466021	0.586483
Atoh8	620.91	511.197	500.382	431.032	504.202	624.714	714.808	536.87	601.154	498.28	468.347	818.981	569.24	-0.0607503	0.848497	1.04301
Atox1	2054.35	1584.61	2018.1	1940.08	1854.74	2031.69	2193.84	2305.64	2175.21	2097.36	1688.47	2120.46	2005.38	-0.0723076	0.646064	1.0514
Tagap	220.061	199.28	203.245	392.162	322.929	327.427	202.088	224.941	178.817	369.987	348.236	332.248	276.785	0.766358	7.37117e-17	0.5879
Baalc	16.2506	9.62706	15.4643	31.0965	21.6087	23.2898	24.7094	21.0882	24.7049	36.6551	34.5643	41.2665	25.0271	0.765534	0.0387753	0.588236
Atp10d	2783.6	2736.97	2780.27	2906.66	2660.27	2641.33	2637.73	2675.56	2769.31	2383.73	2386.67	2691.84	2671.16	-0.0639363	0.443374	1.04531
Atp11a	9097.65	8237.88	8928.44	7857.92	8331.34	8043.19	8943.93	8397.5	8609.09	8381.42	7906.59	8717.81	8454.4	-0.084987	0.106583	1.06068
Atp11b	3852.08	4497.76	4283.62	3691.85	3357.75	3974.33	3760.24	3690.43	3918.67	3468.49	3854.79	3424.06	3814.51	-0.140487	0.10223	1.10228
Atp11c	2036.07	2310.5	2290.93	1756.09	1668.67	2287.88	1884.09	1668.6	1999.92	1845.35	2048.8	2177.6	1997.88	-0.0488579	0.802482	1.03445
Obscn	44.6893	23.105	25.4057	54.4189	39.6159	36.9896	37.0641	28.9963	30.5871	72.1647	55.3029	65.6031	42.8285	0.763424	0.0104022	0.589097
Atp13a1	5189.37	4315.81	4745.34	5151.66	5469.39	4900.44	5038.96	5062.92	4991.58	5536.06	4732.72	5422.84	5046.42	0.0887122	0.298811	0.940362
Atp13a2	4023.39	3200.04	4149.96	3889.66	4318.13	3956.52	4445.05	4332.75	4293.95	4587.61	3586.05	4462.07	4103.76	0.0206036	0.916312	0.98582
Atp13a3	4858.94	4937.72	4977.31	5174.98	4288.12	5978.62	4572.13	3851.23	4501.01	4949.58	4766.42	4857.81	4809.49	0.115736	0.35963	0.922911
Atp1a1	14894.4	14457.9	14744.1	15083.5	15080.4	14245.1	13945.8	14949.8	13368.9	13925.5	12736.1	15158.6	14382.5	-0.00236515	0.984677	1.00164
Atp1a2	134.745	93.3825	101.623	145.981	79.2317	82.1992	139.432	90.5035	84.7027	101.947	100.237	118.509	106.041	-0.0355206	0.937553	1.02493
Atp1a3	325.69	27.9185	28.7195	52.6913	213.686	38.3596	152.669	43.9337	36.4692	38.946	44.9336	30.6853	86.2251	-0.557059	0.675262	1.47127
Atp1b1	921.547	955.967	1004.08	824.058	852.341	1057.63	844.533	848.8	768.206	815.576	916.819	912.095	893.471	0.00780695	0.969695	0.994603
Atp1b2	565.387	745.135	734.556	478.541	506.603	579.504	803.056	921.73	1029.37	718.211	736.22	921.618	728.328	-0.283225	0.255173	1.21691
Zfp503	1515.37	1121.55	1432.66	2009.18	2172.87	1808.38	1526.69	1459.48	1032.9	3245.12	2210.39	2284.47	1818.26	0.762826	8.76899e-07	0.589341
Atp23	548.459	531.414	513.637	506.182	522.209	500.045	549.785	515.782	556.449	540.663	481.308	483.559	520.791	-0.0859915	0.308887	1.06142
Atp2a1	39.9495	26.9558	41.9746	27.6414	36.0144	20.5498	40.5941	41.2977	41.1749	34.3642	46.6618	47.6152	37.0661	-0.112473	0.81256	1.08108
Gm31166	12.188	13.4779	17.6735	25.9138	32.413	21.9198	14.1197	21.9669	19.9992	28.6368	31.972	25.3948	22.1396	0.762445	0.0209963	0.589497
Rasd2	90.0557	74.1284	59.6481	142.526	110.444	98.639	50.3013	42.1764	32.9399	95.0742	93.3237	55.022	78.6899	0.76203	0.0245437	0.589666
Atp2b1	4829.15	4874.18	4812.72	4168.66	4057.63	5008.67	4672.73	4512	4690.41	3869.4	4106.24	4918.12	4543.33	-0.120201	0.209997	1.08689
Atp2b2	57.5544	3.85083	4.41838	6.91034	58.8236	9.5899	21.1795	5.27205	8.23498	5.72736	10.3693	9.52303	16.7878	-0.0146103	0.994233	1.01018
Atp2b3	50.1062	43.3218	36.4516	55.2827	43.2173	46.5795	28.2393	36.9043	25.8814	37.8006	37.1566	38.0921	39.9195	0.212189	0.572487	0.863227
Atp2b4	7833.49	9285.3	10055.1	7337.92	7169.27	9469.34	8749.78	9295.5	10106.7	8032.05	8882.17	9852.11	8839.06	-0.12464	0.368449	1.09024
Atp2c1	4290.85	4605.59	4545.41	4138.43	4213.69	4278.47	4231.49	4117.47	4046.91	3900.33	4409.54	4080.09	4238.19	-0.0462229	0.5385	1.03256
Atp2c2	221.415	159.809	139.179	44.9172	57.6231	200.018	115.605	105.441	91.7612	53.8372	95.916	137.555	118.59	-0.50494	0.337832	1.41906
Atp4a	23.0217	13.4779	13.2551	31.0965	24.0096	21.9198	19.4145	18.4522	16.47	20.6185	21.6027	19.0461	20.1987	0.398	0.333381	0.75891
Atp5a1	38323.8	36058.2	37786	38691.9	38587.1	39161	37222.1	38429.7	37060.9	37652.8	34536.7	37095.4	37550.5	0.00528022	0.950997	0.996347
Atp5b	43905.9	39826.2	41577	46577.4	43756.3	44982.1	41877.2	42056.9	40899.6	43074.3	40092	43932.9	42713.2	0.0690211	0.229567	0.953285
Atp5c1	8669.04	10005.4	8697.58	9155.34	9058.83	8619.95	8228.24	8813.99	8379.68	8340.18	9437.79	7693.55	8758.3	-0.0132801	0.926735	1.00925
Atp5d	6617.4	5272.74	5894.12	6486.22	6153.67	6548.53	6650.36	6458.26	6475.05	6498.26	4879.62	6801.56	6227.98	-0.000296187	0.999012	1.00021
Atp5e	3944.84	3265.5	3519.24	4122.02	3806.72	3677.04	3907.62	3637.71	3585.75	4119.12	3675.05	4137.23	3783.15	0.106295	0.189573	0.928971
Atp5f1	9481.58	10485.8	8916.29	9743.58	9337.34	9118.63	9093.07	9421.15	8886.72	8997.68	9916.5	8301.97	9308.36	-0.0223821	0.84512	1.01564
Spon2	181.466	131.891	174.526	235.815	249.7	319.207	163.259	205.61	208.227	414.661	324.905	261.354	239.218	0.761174	2.32851e-05	0.590016
Atp5g2	2470.1	2062.12	2548.3	1930.58	2034.82	2127.59	2412.7	2461.17	2315.21	2390.6	2148.17	2735.23	2303.05	-0.0945108	0.497485	1.0677
Atp5g3	10548	9524.05	9814.33	11510	10739.5	10739.3	9885.53	10576.6	9921.98	10688.4	9382.49	10285.9	10301.3	0.0715622	0.351802	0.951607
Atp5h	5558.4	5599.1	5134.16	5566.28	5316.93	4914.14	5360.18	5629.67	5160.98	5147.75	5266.74	4766.81	5285.09	-0.0665566	0.340088	1.04721
Atp5j	5380.32	5217.87	5191.6	5383.15	5147.66	5114.16	5036.31	5361.67	4916.28	5146.6	5355.74	4955.15	5183.88	-0.000141321	0.998909	1.0001
Atp5j2	3989.53	3504.25	3466.22	3707.4	3779.11	3566.07	3904.97	3980.4	3948.09	3721.64	3523.83	3426.18	3709.81	-0.069841	0.356245	1.0496
Atp5k	2273.74	1436.36	2021.41	2221.67	2183.67	2009.77	2436.53	2235.35	2097.57	2580.75	2097.19	2667.51	2188.46	0.138275	0.455401	0.908605
Atp5l	3939.43	3961.54	3518.14	4018.36	4070.83	3604.43	3976.45	3754.58	3782.21	3964.48	4027.61	3468.5	3840.55	0.0139281	0.906946	0.990392
Atp5o	6543.59	5848.44	6174.69	6431.8	5733.5	6475.92	5919.67	5956.54	6008.01	5989.67	5588.19	6619.57	6107.47	0.0149403	0.897307	0.989698
Atp5s	270.167	359.089	282.776	261.729	271.309	284.957	292.983	329.503	290.577	331.041	340.459	315.318	302.492	-0.0144475	0.953262	1.01006
Mcur1	613.462	730.694	674.908	1274.09	1345.74	1043.93	627.443	659.885	658.799	1061.85	1072.36	915.269	889.869	0.760675	1.9438e-14	0.59022
Atp6ap1	5235.42	6078.53	5410.31	6173.52	6090.04	5459.39	5365.47	5504.02	5603.32	5744.54	6249.23	5924.39	5736.51	0.103241	0.109591	0.930939
Arfgef2	1616.26	1643.34	1653.58	2805.6	2671.07	2812.58	1621.11	1548.23	1690.52	2807.55	2488.63	2959.55	2193.17	0.759722	2.25224e-55	0.59061
Atp6v0a1	2791.73	2371.15	2741.6	2852.24	2977.19	2971.5	2927.18	2774.86	2905.77	2830.46	2596.64	3126.73	2822.25	0.0712994	0.469394	0.95178
Atp6v0a2	3508.79	3689.09	3563.42	3925.94	3973.59	3334.55	3402.84	3432.1	3629.27	3594.49	3548.89	3493.9	3591.41	0.0439714	0.607876	0.969981
Atp6v0a4	16.9278	11.5525	11.046	15.5483	16.8067	19.1798	21.1795	15.8161	16.47	25.2004	19.8745	23.2785	17.74	0.351898	0.442393	0.783553
Atp6v0b	2816.1	2415.43	2812.3	2788.32	2619.45	2345.42	2823.05	2716.86	2814.01	2739.97	2396.17	2430.49	2643.13	-0.0977358	0.265076	1.07009
Atp6v0c	6391.92	5717.51	5969.23	6999.31	6738.3	6247.14	6176.47	6300.1	6288	6394.02	5490.54	6616.39	6277.41	0.0627456	0.509252	0.95744
Atp6v0d1	2726.05	2638.78	2577.02	2631.11	2434.58	2518.03	2683.62	2903.14	2708.13	2625.42	2421.23	2693.96	2630.09	-0.0837718	0.162345	1.05979
Atp6v0d2	321.627	348.5	298.241	419.803	368.548	232.898	201.205	232.849	291.754	171.821	224.668	384.096	291.334	0.0902478	0.840233	0.939361
Atp6v0e	1736.79	1680.89	1656.89	1868.38	1787.52	1617.95	1641.41	1718.69	1792.87	1647.19	1612.43	1564.95	1693.83	-0.0175534	0.877047	1.01224
Atp6v0e2	387.307	213.721	261.789	285.915	342.137	212.348	288.571	248.665	272.931	240.549	283.427	255.006	274.364	-0.0485889	0.883264	1.03425
Atp6v1a	3778.95	3920.14	3544.65	3830.06	3806.72	3807.19	3392.25	3637.71	3697.51	3620.84	3684.56	3832.49	3712.76	0.0393308	0.560126	0.973106
Atp6v1b2	3774.89	3771.88	3930.15	4029.59	3603.84	3616.76	3566.98	3684.28	3779.86	3482.23	3487.54	3845.19	3714.43	-0.0279538	0.741625	1.01957
Atp6v1c1	1532.98	1706.88	1627.07	1590.24	1484.99	1409.72	1473.74	1502.53	1475.24	1420.38	1495.77	1359.68	1506.6	-0.0875761	0.285337	1.06258
Atp6v1c2	43.3351	30.8066	24.3011	32.8241	27.6111	24.6597	27.3569	20.2095	14.1171	40.0915	30.2438	19.0461	27.8835	0.108005	0.865217	0.92787
Atp6v1d	1952.11	2030.35	1873.39	1876.16	1794.72	1874.14	1759.66	1822.37	1778.76	1883.16	1886.35	1761.76	1857.74	-0.01862	0.845722	1.01299
Atp6v1e1	2658.33	2753.34	2549.41	2619.88	2583.43	2394.74	2406.52	2642.18	2261.09	2344.78	2589.73	2243.2	2503.89	-0.0476534	0.658392	1.03358
Atp6v1f	1932.47	1628.9	1646.95	1858.88	1787.52	1679.6	2008.52	1891.79	1866.99	1906.06	1637.48	1712.03	1796.43	-0.0534798	0.645047	1.03776
Atp6v1g1	4829.15	4797.17	4746.44	4759.5	4624.25	4764.81	4595.07	4546.26	4296.31	4671.23	4776.79	4403.87	4650.9	0.00937201	0.914449	0.993525
Atp6v1g2	198.393	172.324	180.049	164.121	206.483	161.658	201.205	191.551	229.403	158.075	192.696	187.286	186.937	-0.129474	0.444733	1.09389
Atp6v1h	1658.92	1880.17	1614.92	1804.46	1674.67	1539.86	1413.73	1511.32	1444.65	1563.57	1676.37	1455.97	1603.22	0.0290977	0.860917	0.980033
Atp7a	1201.19	542.966	1347.61	1204.99	758.704	1698.78	1371.37	608.043	1125.84	1142.04	671.412	1716.26	1115.77	0.214679	0.713806	0.861738
Atp7b	209.227	153.07	160.166	151.164	220.888	216.458	194.145	152.011	125.878	243.985	223.804	204.216	187.918	0.333159	0.0956278	0.793796
Pgbd5	228.863	153.07	182.258	286.779	320.528	230.158	188.851	165.191	134.113	295.532	311.943	336.481	236.147	0.754618	6.31023e-07	0.592703
Zbtb16	36.564	41.3964	41.9746	75.1499	82.8332	56.1694	75.8932	75.566	58.8213	87.0559	85.5467	168.24	73.7676	0.751745	0.0391976	0.593885
Atp8b1	266.781	271.483	293.822	298.008	309.724	327.427	187.968	181.007	204.698	241.695	229.853	275.11	257.298	0.25666	0.224001	0.837024
Atp8b2	7123.88	7092.26	7157.78	7971.94	8074.43	6933.5	6978.65	7219.19	6950.32	7577.3	6899.9	7500.98	7290.01	0.080403	0.212186	0.945793
Atp8b3	25.0531	15.4033	12.1505	20.731	14.4058	6.84993	22.062	16.6948	25.8814	16.0366	14.6898	19.0461	17.417	-0.33862	0.527764	1.26455
Atp8b4	18.9591	21.1795	22.0919	22.4586	31.2125	17.8098	36.1817	14.0588	25.8814	28.6368	9.50519	11.6393	21.6345	-0.196941	0.774849	1.14627
Atp9a	5675.54	4672.01	5277.76	5834.92	5851.14	5310.07	5894.08	5526.86	5050.4	6274.89	5025.65	5635.52	5502.4	0.0798824	0.46794	0.946135
Atp9b	3752.55	3627.48	3781.03	3940.62	4004.8	3807.19	3740.83	3845.08	3824.56	3849.93	3914.41	3730.91	3818.28	0.0430989	0.326198	0.970568
Atpaf1	1295.99	1390.15	1266.97	1363.93	1468.19	1339.85	1295.48	1267.93	1243.48	1260.02	1440.47	1169.22	1316.81	0.0514409	0.629784	0.964972
Atpaf2	1583.08	1534.55	1498.94	1464.13	1391.36	1443.97	1483.45	1510.44	1523.47	1454.75	1392.08	1449.62	1477.49	-0.0886637	0.0624697	1.06338
Atpif1	5282.81	4460.22	4384.14	5260.5	5232.9	4620.96	5614.33	5297.53	5059.81	5597.92	5156.13	5028.16	5082.95	0.0376032	0.781043	0.974272
Atr	2459.94	2183.42	2466.56	2213.9	1986.8	2812.58	2365.93	1970.87	2332.85	2240.54	2228.53	2416.73	2306.55	0.0118848	0.953262	0.991796
Atraid	1530.95	1509.52	1588.41	1464.99	1433.37	1423.42	1672.3	1775.8	1842.28	1494.84	1405.9	1642.19	1565.33	-0.161253	0.0517493	1.11826
Syn3	73.1279	92.4198	86.1584	152.027	166.867	147.958	112.957	91.3822	117.643	164.948	149.491	178.821	127.817	0.751056	4.24422e-07	0.594169
Abcc6	88.0243	57.7624	80.6354	127.841	121.249	138.369	77.6582	59.7499	65.8799	107.674	104.557	128.032	96.4527	0.750409	6.8934e-06	0.594435
Atrnl1	3520.97	3658.28	3637.43	3375.7	3476.59	3567.44	3827.31	3566.54	3646.92	3379.14	3338.05	3713.98	3559.03	-0.0684136	0.198207	1.04856
Atrx	12789.9	12983.1	14684.5	12617.4	11022.8	17241.3	13191.3	11198.7	13726.5	13045.8	13233	15923.6	13471.5	0.0804917	0.654441	0.945735
Atxn1	1943.98	1915.79	2044.61	1663.66	1739.5	1815.23	1770.25	1658.06	1651.7	1733.1	1929.55	1641.14	1792.21	-0.0622336	0.584948	1.04408
Atxn10	8068.45	8930.06	7524.5	8566.23	8464.59	8251.43	7893.78	8441.43	7782.06	8326.43	8817.36	8089.29	8262.97	0.0545664	0.45036	0.962884
Atxn1l	4642.95	4664.31	4866.85	4616.97	4707.09	4753.85	4847.46	4504.09	4837.46	4786.93	4819.13	4640.89	4724	-0.00142857	0.984233	1.00099
Pgm5	2375.3	1977.4	2791.31	3135.57	3789.92	3157.82	1662.59	1732.75	1452.89	3877.42	3472.85	2697.13	2676.91	0.747127	4.81476e-06	0.595789
Atxn2l	14465.1	12666.3	14630.4	13600.4	15186.1	13642.3	14999.5	14565.8	14345.3	15258.8	13486.1	15625.2	14372.6	0.0187579	0.87578	0.987082
Atxn3	1530.27	1766.57	1727.59	1511.64	1430.97	1617.95	1555.81	1515.71	1697.58	1381.44	1714.39	1440.09	1574.17	-0.105011	0.29175	1.0755
Atxn7	1963.62	2272.95	1984.96	2206.99	2186.08	2271.44	2178.84	1969.99	2199.92	2161.51	2327.04	2152.21	2156.29	0.0829066	0.252062	0.944154
Atxn7l1	881.598	757.65	966.521	792.098	879.952	904.191	951.313	719.635	912.907	890.032	826.087	966.059	870.67	0.0186655	0.92599	0.987145
Atxn7l2	1923.67	1642.38	1903.22	1863.2	2040.82	1801.53	2115.3	2066.64	2164.62	2168.38	1899.31	2445.3	2002.86	0.0484876	0.773971	0.966949
Atxn7l3	9273.7	8615.26	9004.66	9179.52	9621.85	9283.02	9217.5	9167.21	8729.08	9736.51	9080.05	8916.73	9152.09	0.047009	0.355532	0.967941
Atxn7l3b	15679.2	18281.8	16215.5	17426.1	17025.2	15998.7	16210.3	16549.8	16121.7	16981.6	18192.1	15057	16644.9	0.0235891	0.827903	0.983782
Auh	1272.97	1288.1	1382.95	1223.13	1297.72	1297.38	1409.32	1360.19	1462.3	1229.09	1336.78	1353.33	1326.1	-0.0779032	0.293413	1.05548
Kirrel2	60.9399	67.3894	76.2171	114.884	117.647	149.328	73.2458	100.169	72.9384	112.256	111.47	151.31	100.65	0.745355	3.02685e-05	0.596521
Aup1	3749.84	3688.13	3905.85	3760.09	3813.93	3377.02	3882.03	4005	3879.85	3991.97	3565.31	3738.32	3779.78	-0.0545444	0.431672	1.03853
Gm4631	3271.8	3984.64	3639.64	6361.83	5894.36	6258.1	3750.54	3850.35	4511.59	6453.59	7636.12	5945.55	5129.84	0.745229	7.01181e-18	0.596573
Aurkaip1	1958.88	1808.93	1871.18	1837.29	1881.15	1771.39	2014.7	2045.55	1924.63	1780.06	1819.81	1874.98	1882.38	-0.0847304	0.132425	1.06049
Cd52	24.376	18.2914	19.8827	41.462	39.6159	36.9896	15.8846	17.5735	22.3521	17.1821	36.2925	26.4529	26.3629	0.743665	0.0304113	0.59722
Has2	2484.32	2692.69	2784.68	4689.53	4851.14	3524.97	2626.26	2505.98	2425.79	4861.38	4473.49	3546.8	3455.59	0.741816	9.22465e-15	0.597986
Aven	681.85	691.223	680.431	793.825	751.501	735.682	645.092	699.425	709.385	630.009	719.802	648.624	698.904	0.0607637	0.58964	0.958756
Avil	52.8146	58.7251	76.2171	41.462	51.6207	45.2095	66.186	69.4153	96.4669	58.4191	57.0311	57.1382	60.8921	-0.420793	0.0951445	1.33866
Avl9	2065.86	1652.97	2153.96	1779.41	1581.03	2256.37	2145.31	1645.76	2088.16	2044.67	1852.65	2052.74	1943.24	-0.0232298	0.919822	1.01623
Avpi1	362.254	278.222	305.973	358.474	321.729	280.847	343.284	333.896	301.165	300.114	282.563	377.747	320.522	-0.0037897	0.988098	1.00263
Avpr1a	12.8651	21.1795	22.0919	11.2293	14.4058	16.4398	15.0021	32.511	22.3521	19.473	16.4181	32.8016	19.7308	-0.181383	0.788125	1.13397
Avpr2	27.0844	28.8812	36.4516	22.4586	16.8067	13.6999	16.7671	28.9963	22.3521	21.764	31.1079	20.1042	23.8728	-0.32531	0.47369	1.25293
Awat2	31.8242	43.3218	36.4516	24.1862	31.2125	27.3997	40.5941	43.9337	55.292	43.5279	31.1079	22.2204	35.9227	-0.48023	0.126282	1.39497
Axdnd1	16.2506	29.8439	19.8827	12.9569	16.8067	24.6597	25.5919	21.0882	39.9985	20.6185	13.8257	28.5691	22.5077	-0.379178	0.453929	1.3006
Axin1	5047.86	4812.57	4855.8	4717.17	4908.77	4860.71	4986.89	4899.49	4569.24	4715.91	4659.27	4891.67	4827.11	-0.0222121	0.707813	1.01552
Lrrc4	280.324	336.947	373.353	585.651	481.393	378.116	180.026	230.213	238.814	546.39	441.559	303.679	364.705	0.740813	0.00103727	0.598402
Axl	8713.06	8498.77	8671.07	10232.5	9705.89	7892.49	9400.17	8869.34	8114.99	10219.9	9262.37	9005.62	9048.85	0.107818	0.249941	0.92799
Azi2	3672.65	4104.98	3940.09	3798.1	3561.83	3846.92	3647.29	3753.7	3810.44	3978.22	4108.83	3671.66	3824.56	0.00305629	0.978842	0.997884
Azin1	6990.49	8518.99	6905.93	6895.66	7122.45	6699.23	6342.38	6780.73	6225.65	6843.05	8092.37	6852.35	7022.44	0.0254719	0.878748	0.982499
Azin2	922.901	785.568	937.801	687.579	853.542	869.941	1161.34	1159.85	1127.02	932.414	801.028	1031.66	939.221	-0.236301	0.14294	1.17797
Kif17	39.9495	61.6132	58.5435	107.11	99.6399	64.3893	80.3056	75.566	90.5848	121.42	117.519	164.008	90.0541	0.739502	0.0115937	0.598946
B230217C12Rik	209.227	224.311	207.664	253.955	229.292	295.917	242.682	200.338	281.166	305.841	284.292	263.471	249.846	0.261022	0.0670125	0.834496
B230219D22Rik	10149.9	10926.7	10278.3	9554.41	9805.53	10574.9	9613.73	9226.96	9537.29	9281.76	10148.1	9442.62	9878.35	-0.0226553	0.824088	1.01583
B230307C23Rik	150.318	99.1588	151.33	110.565	102.041	191.798	117.37	89.6248	134.113	109.965	105.421	205.274	130.582	0.1499	0.713803	0.901313
Fbxl21	45.3664	47.1726	56.3343	86.3792	86.4346	71.2393	51.1838	53.5992	68.2327	96.2196	90.7313	99.4628	71.0297	0.73876	2.48928e-05	0.599254
Rspo3	1008.22	1165.84	923.441	1824.33	1866.75	1117.91	784.524	655.491	719.973	1447.88	1555.39	957.594	1168.94	0.738264	0.000302649	0.59946
B3galnt1	633.098	773.053	567.762	572.694	587.035	590.464	606.263	636.161	643.505	664.374	763.872	605.242	636.96	-0.0275048	0.895018	1.01925
B3galnt2	3038.19	3222.18	2835.5	3177.89	3063.63	2879.71	2830.99	2925.11	2828.13	3012.59	3344.1	2739.46	2991.46	0.0436121	0.663963	0.970223
B3galt1	371.734	396.635	292.718	327.377	316.927	309.617	375.054	327.746	377.633	242.84	320.584	311.086	330.829	-0.22735	0.0858818	1.17068
B3galt4	93.4412	62.5759	82.8446	81.1965	88.8356	102.749	95.3078	74.6874	104.702	103.092	101.101	110.044	91.7147	0.191373	0.425502	0.875772
B3galt5	83.2846	146.331	141.388	31.9603	74.4298	138.369	39.7116	55.3565	76.4677	46.9643	40.6131	59.2544	77.8442	-0.477272	0.433476	1.39211
B3galt6	934.412	859.697	882.571	837.015	867.948	911.041	925.721	979.722	898.789	895.759	823.495	872.945	890.76	-0.0778287	0.298039	1.05543
B3gat1	371.056	312.88	313.705	508.774	428.572	220.568	654.8	363.771	419.984	822.449	572.904	977.698	497.263	0.535713	0.266971	0.689818
B3gat2	155.058	171.362	164.585	161.529	217.287	150.698	156.199	152.011	167.052	146.62	166.773	143.904	162.757	0.031771	0.901903	0.978219
B3gat3	2020.5	1584.61	1867.87	2093.83	2148.86	1794.68	2140.89	1925.18	1941.1	2111.1	1726.49	2193.47	1962.38	0.0717565	0.619852	0.951479
B3glct	2472.13	2731.2	2440.05	2656.16	2557.02	2398.85	2900.71	2800.34	2796.36	2694.15	2931.92	2966.95	2695.49	0.00664486	0.967588	0.995405
B3gnt2	371.056	240.677	372.249	420.667	384.154	416.476	509.191	479.756	389.397	449.025	291.204	386.212	392.505	-0.0105483	0.978927	1.00734
B3gnt3	8.80243	14.4406	8.83676	15.5483	14.4058	16.4398	9.70727	7.90807	10.5878	20.6185	13.8257	9.52303	12.5537	0.585216	0.232199	0.666549
B3gnt4	27.7615	13.4779	28.7195	38.8707	19.2077	27.3997	31.7693	18.4522	27.0578	34.3642	16.4181	26.4529	25.8293	0.145656	0.810924	0.903968
Vstm2a	159.121	159.809	134.761	201.264	295.318	142.479	155.316	48.3271	97.6434	213.058	179.734	227.495	167.86	0.736623	0.0232738	0.600143
Mtus2	95.4726	52.9489	56.3343	116.612	172.869	128.779	111.192	101.926	128.23	139.748	202.201	149.194	121.292	0.736523	0.00786694	0.600184
B3gnt8	306.054	243.565	249.638	310.101	336.135	332.907	370.641	322.474	324.694	305.841	288.612	355.527	312.182	0.0830825	0.680724	0.944038
B3gnt9	1060.35	1219.75	1262.55	1469.31	1533.01	993.24	1111.04	1209.94	1210.54	1143.18	1173.46	1267.62	1221.17	0.101085	0.542532	0.932332
Gm14419	20.9904	24.0677	28.7195	63.0569	19.2077	54.7994	35.2992	28.9963	35.2928	52.6917	46.6618	48.6733	38.2047	0.73029	0.0358586	0.602783
B430203G13Rik	249.177	279.185	244.116	234.952	276.111	231.528	262.096	216.154	282.342	255.44	294.661	241.25	255.584	0.00521789	0.982764	0.99639
B430218F22Rik	58.2315	45.2472	41.9746	49.2362	62.425	52.0595	58.2436	47.4484	42.3513	61.8555	30.2438	73.0099	51.8605	0.147846	0.715159	0.902597
B430305J03Rik	38.5953	0	0	0	32.413	0	0	131.801	14.1171	107.674	0	103.695	35.6914	0.401259	0.944389	0.757197
B430306N03Rik	21.6675	37.5455	36.4516	41.462	12.0048	45.2095	31.7693	34.2683	50.5863	51.5462	25.9232	38.0921	35.5439	0.021418	0.978424	0.985264
B4galnt1	1398.91	987.737	1156.51	1388.11	1169.27	809.662	1241.65	1107.13	897.613	1119.13	880.526	849.666	1083.83	-0.127449	0.606011	1.09236
B4galnt3	472.623	356.201	362.307	394.753	400.961	437.026	320.34	401.554	327.046	273.768	256.64	316.376	359.966	-0.111663	0.67678	1.08047
B4galnt4	4263.76	3454.19	3785.45	4061.55	4236.5	4175.72	4414.16	4017.3	3999.85	4205.03	3749.36	3903.39	4022.19	0.0229671	0.859595	0.984206
B4galt1	4857.59	5937.01	5208.17	5414.25	5518.61	5397.74	4980.71	5339.71	5736.25	4649.47	5034.29	5915.92	5332.48	-0.00556808	0.973096	1.00387
Cyfip2	1859.34	1660.67	1631.49	2727.86	2478.99	2930.4	1319.31	1299.56	1128.19	2245.12	2282.97	2102.47	1972.2	0.72993	5.90765e-08	0.602933
B4galt3	2608.23	2349.97	2543.88	2567.19	2582.23	2470.08	2654.5	2485.77	2649.31	2402.05	2269.15	2562.75	2512.09	-0.042309	0.604241	1.02976
B4galt4	723.831	805.785	769.903	736.815	821.129	701.433	748.342	789.929	844.674	876.286	820.039	775.598	784.48	0.0174899	0.906344	0.98795
Mcoln3	36.564	58.7251	75.1125	78.6051	72.0289	127.409	45.0064	46.5698	48.2335	65.2919	91.5955	77.2424	68.532	0.729071	0.00621477	0.603292
B4galt6	2052.32	2191.12	2074.43	2279.55	2138.06	2226.23	1912.33	1848.73	2178.74	2064.14	2200.02	2144.8	2109.21	0.0918461	0.214851	0.938321
B4galt7	1325.78	1190.87	1280.23	1343.2	1430.97	1259.02	1364.31	1225.75	1339.95	1399.77	1307.4	1495.12	1330.2	0.092	0.259669	0.938221
B4gat1	1359.64	1308.32	1475.74	1233.5	1309.72	1369.99	1421.67	1412.91	1474.06	1300.11	1123.34	1399.89	1349.07	-0.128779	0.116521	1.09337
B630019K06Rik	712.997	569.922	597.586	599.472	424.97	461.685	634.503	600.135	485.864	520.044	503.775	532.232	553.599	-0.243439	0.0756858	1.18381
B930094E09Rik	33.8555	15.4033	18.7781	29.3689	20.4082	30.1397	37.9466	26.3602	29.4106	24.0549	18.1463	46.5571	27.5358	0.0500576	0.945798	0.965898
Ppp2r5a	4420.18	4865.52	4918.76	7565.96	7397.36	7534.92	4346.21	4621.83	4609.24	7523.46	7658.59	8315.72	6148.15	0.727959	1.96602e-59	0.603757
Zfp939	163.861	144.406	143.597	251.364	249.7	201.388	133.254	137.073	168.229	249.713	279.107	234.902	196.383	0.725121	2.1246e-10	0.604946
BC003331	1354.9	1681.85	1485.68	1634.3	1582.23	1483.69	1389.02	1530.65	1563.47	1575.02	1816.36	1543.79	1553.41	0.0998085	0.320897	0.933157
BC003965	1434.12	1393.04	1347.61	1541.01	1497	1333	1383.73	1438.39	1269.36	1502.86	1420.59	1295.13	1404.65	0.0548661	0.56392	0.962684
BC004004	1258.07	1266.92	1234.94	1274.96	1331.33	1348.07	1291.07	1281.11	1364.65	1230.24	1338.5	1330.05	1295.83	0.0295403	0.69906	0.979732
BC005537	11766.8	13397	12226.8	11828.8	11075.6	11598.3	11429	12008.8	11783.1	11063	12262.6	10662.6	11758.5	-0.0840916	0.230724	1.06002
BC005561	316.888	141.518	468.348	494.953	313.326	958.99	424.473	108.956	443.513	596.791	362.061	862.364	457.682	0.914743	0.109315	0.530438
BC005624	1815.33	1844.55	1793.86	1737.09	1794.72	1779.61	1941.45	1958.57	2036.39	1912.94	1780.93	1810.43	1850.49	-0.0744332	0.245862	1.05295
BC017158	2193.84	2170.9	2368.25	2432.44	2515.01	2294.73	2350.04	2372.42	2484.61	2427.25	2326.18	2588.15	2376.99	0.0662221	0.358938	0.955136
Kctd11	455.695	480.39	466.139	948.444	768.308	728.833	557.727	545.657	477.629	942.723	782.882	743.855	658.19	0.721222	1.65315e-13	0.606583
BC021767	34.5326	16.366	27.6149	13.8207	12.0048	24.6597	31.7693	22.8455	19.9992	19.473	15.5539	12.6974	20.9448	-0.669617	0.0990393	1.59065
BC022687	321.627	291.7	235.279	303.191	332.533	272.627	307.985	314.566	301.165	388.315	311.943	343.887	310.402	0.136832	0.392431	0.909514
BC022960	111.723	129.003	78.4262	101.064	114.046	126.039	120.9	133.559	124.701	116.838	145.17	98.4047	116.656	0.00479561	0.990029	0.996681
BC024139	73.1279	7.70165	16.5689	8.63792	30.012	9.5899	19.4145	10.5441	8.23498	11.4547	9.50519	11.6393	18.0359	-0.769459	0.403915	1.70463
BC024978	903.265	1091.71	902.454	1064.19	989.196	809.662	938.076	930.517	969.375	1075.6	1031.75	885.642	965.953	0.03225	0.848497	0.977894
BC025920	344.649	352.351	367.83	264.32	320.528	363.046	356.522	344.441	329.399	294.386	338.73	280.4	329.717	-0.174947	0.142315	1.12892
BC026585	330.43	387.008	341.32	439.67	380.552	372.636	410.353	413.856	392.926	500.571	430.326	460.28	404.994	0.186098	0.152964	0.87898
BC028528	205.842	297.476	263.998	200.4	186.075	157.548	174.731	179.25	209.404	192.439	172.822	189.403	202.449	-0.271994	0.17742	1.20748
BC029214	427.257	343.686	381.085	391.298	433.374	338.387	424.473	444.609	424.69	406.642	388.849	490.965	407.943	0.00211355	0.993247	0.998536
Ptrh1	138.808	124.189	140.284	247.045	271.309	184.948	145.609	147.617	130.583	224.512	214.299	216.914	182.176	0.716729	1.49262e-09	0.608475
BC030336	2391.55	2520.37	2459.93	2506.73	2334.94	2452.27	2319.16	2049.95	2185.8	2184.41	2518.87	2160.67	2340.39	0.0240687	0.859158	0.983455
BC030499	31.1471	40.4337	35.347	36.2793	44.4178	61.6494	22.9445	28.1176	36.4692	30.9277	38.8849	37.034	36.971	0.352796	0.300661	0.783065
BC030867	1273.64	1092.67	1102.39	908.71	1007.2	1142.57	1127.81	1144.03	865.85	962.196	938.421	1065.52	1052.58	-0.136256	0.305962	1.09905
Ighm	52.8146	34.6574	36.4516	40.5982	82.8332	61.6494	40.5941	38.6617	38.8221	84.7649	61.3517	69.8356	53.5862	0.711537	0.0064424	0.610669
BC034090	1341.36	1266.92	1462.48	1579.88	1631.45	1238.47	1304.3	1397.09	1468.18	1419.24	1437.88	1604.1	1429.28	0.114635	0.284905	0.923616
BC035947	231.572	173.287	280.567	238.407	205.282	283.587	252.389	158.161	269.402	274.913	250.591	272.994	240.929	0.161995	0.516181	0.893788
BC037034	2456.56	2152.61	2315.23	2411.71	2585.84	2167.32	2738.33	2561.34	2557.55	2681.55	2401.36	2509.85	2461.6	-0.00233216	0.988906	1.00162
Mapre3	806.438	735.508	766.589	1255.09	1332.53	1157.64	814.528	869.009	861.144	1311.57	1284.93	1599.87	1066.24	0.710956	9.57803e-18	0.610915
BC049715	35.8868	28.8812	38.6608	42.3258	18.0072	34.2496	42.359	29.8749	45.8806	21.764	27.6515	45.4989	34.2534	-0.213098	0.64597	1.15917
BC051142	16.9278	6.73894	5.52298	10.3655	16.8067	5.47994	15.8846	8.78675	16.47	19.473	20.7386	20.1042	13.6082	0.401585	0.574858	0.757026
BC052040	555.908	681.596	554.507	584.788	600.24	578.134	569.199	626.495	591.742	555.554	538.339	601.009	586.459	-0.0500759	0.682974	1.03532
BC055324	1859.34	1912.9	1950.71	1635.16	1723.89	1959.08	1803.79	1820.61	1696.41	1660.93	1818.08	1669.71	1792.55	-0.0787344	0.350947	1.05609
Tfr2	67.711	49.098	39.7654	84.6517	84.0337	69.8693	43.2415	56.2352	63.527	88.2013	95.916	99.4628	70.1427	0.706396	0.000446496	0.612849
Ampd3	207.873	170.399	184.467	346.381	283.313	330.167	403.293	304.021	277.637	521.19	545.252	497.314	339.276	0.705923	0.0113466	0.61305
BC085271	14.2193	19.2541	17.6735	23.3224	18.0072	26.0297	9.70727	17.5735	11.7643	13.7457	21.6027	11.6393	17.0449	0.344087	0.507207	0.787807
BC106179	100.889	105.898	112.669	104.519	124.85	94.529	97.0727	105.441	90.5848	96.2196	127.888	86.7654	103.944	0.0557619	0.840517	0.962086
Rfx8	58.2315	68.3522	65.1711	82.9241	86.4346	87.6791	45.0064	36.0257	41.1749	100.802	78.6338	76.1843	68.8849	0.70394	0.00122963	0.613893
Babam1	2678.65	2360.56	2669.81	2382.34	2451.38	2567.35	2800.11	2633.39	2610.49	2630	2233.72	2710.89	2560.72	-0.0740037	0.413702	1.05263
Bace1	5961.96	6461.69	6358.05	6294.46	6599.04	6523.87	6756.26	6654.2	7575.01	6589.9	6907.68	7344.38	6668.87	0.0181542	0.890282	0.987495
Bace2	72.4508	80.8673	113.773	60.4655	81.6327	75.3492	77.6582	118.621	121.172	58.4191	60.4876	102.637	85.2945	-0.410901	0.14401	1.32952
Bach1	4709.3	4795.24	4402.92	5041.96	4614.65	4668.91	4310.91	4310.78	3933.97	4471.92	4605.7	3957.35	4485.3	0.0478898	0.678815	0.96735
Bach2	2449.79	2099.66	2359.41	1680.08	1686.68	2541.32	2195.61	1644	1621.11	1797.25	1786.11	2067.56	1994.05	-0.0987069	0.666752	1.07081
Bad	1085.41	1017.58	1043.84	1175.62	1260.5	1112.43	1235.47	1180.94	1267.01	1303.55	1158.77	1317.35	1179.87	0.101944	0.347031	0.931776
Bag1	4030.16	3824.83	3779.92	4475.31	4093.64	3844.18	3791.13	3848.6	3473.99	4027.48	4095.87	3719.27	3917.03	0.0925024	0.210294	0.937895
Bag2	791.542	765.352	726.824	909.573	932.774	724.723	749.225	825.076	792.911	844.213	816.582	778.773	804.797	0.107224	0.291007	0.928373
Bag3	2500.57	2450.09	2463.25	2506.73	2272.51	2411.18	2513.3	2452.38	2241.09	2512.02	2087.69	2532.07	2411.91	-0.0306821	0.775087	1.02149
Bag4	1894.55	1905.2	1854.62	1775.96	1786.32	1968.67	1689.07	1672.12	1777.58	1718.21	1786.98	1669.71	1791.58	-0.0127339	0.917283	1.00887
Bag5	1769.29	1869.58	1641.43	1917.62	1731.09	1771.39	1571.7	1677.39	1517.59	1720.5	1704.89	1569.18	1705.14	0.0513097	0.648778	0.96506
Bag6	14731.9	12475.7	13952.1	13554.6	13973.6	14887.6	15044.5	14719.6	13933.6	14577.3	12546	16711.9	14259	0.0233326	0.875974	0.983957
Bahcc1	7104.24	5900.43	7169.93	5564.55	5721.49	6700.6	6881.57	6441.57	6462.11	6080.16	5280.56	7399.4	6392.22	-0.121233	0.336339	1.08766
Bahd1	1759.81	1468.13	1646.95	1737.09	1786.32	1615.21	1554.93	1629.94	1422.3	1844.21	1467.26	1742.72	1639.57	0.102787	0.332586	0.931232
Baiap2	1967.01	1778.12	1915.37	1619.61	1630.25	1924.83	2013.82	1996.35	1834.05	1807.55	1608.11	2168.08	1855.26	-0.0978562	0.425502	1.07018
Baiap2l1	278.969	280.148	236.383	203.855	212.485	293.177	267.391	236.364	243.52	257.731	260.961	257.122	252.342	-0.0610879	0.759399	1.04325
Baiap2l2	129.328	123.226	177.84	177.077	140.456	112.339	164.141	212.639	181.17	163.802	149.491	252.889	165.367	0.0160362	0.973096	0.988946
Alg1	626.327	589.176	661.652	1059.01	1117.65	1002.83	670.684	614.194	764.677	1109.96	934.965	1160.75	859.323	0.703099	3.17081e-18	0.614251
Bak1	2214.83	1763.68	2192.62	2273.5	2092.44	2271.44	2347.4	2343.43	2279.91	2304.69	2042.75	2417.79	2212.04	0.0280892	0.856803	0.980718
Bambi	2025.91	2259.47	2194.83	1879.61	1795.92	1722.07	1405.79	1877.73	1614.06	1213.05	1449.97	1552.25	1749.22	-0.243241	0.181389	1.18365
Bambi-ps1	22.3446	12.5152	8.83676	12.9569	15.6063	16.4398	16.7671	14.0588	15.2935	24.0549	24.195	11.6393	16.2257	0.205825	0.742271	0.867043
Banf1	4802.74	4093.43	4459.25	4725.81	4392.56	4814.13	4735.38	4712.33	4611.59	4383.72	3929.1	4803.84	4538.66	-0.0198958	0.878633	1.01389
Bank1	14.2193	23.105	11.046	17.2758	31.2125	12.3299	13.2372	7.90807	15.2935	18.3275	36.2925	15.8717	18.0099	0.642962	0.226832	0.640397
Gm10163	8169.34	9059.07	8808.04	12214	15021.6	11028.4	6530.35	7821.96	6973.85	12219.9	16743.8	9815.07	10367.1	0.701969	3.50141e-07	0.614733
Bap1	6697.97	6221.97	6624.26	6053.46	6505.41	6671.83	6721.85	6917.81	6713.86	6644.88	6263.06	6555.02	6549.28	-0.0449022	0.444561	1.03161
Bard1	1626.42	1594.24	1482.37	1464.13	1635.05	1738.51	1313.13	1383.03	1196.43	1405.49	1703.16	1425.28	1497.27	0.123432	0.35594	0.918002
Barx1	7782.03	6747.61	8017.15	4846.74	6471.79	8998.07	12063.5	12471.9	12034.8	9256.56	8226.31	11402.2	9026.56	-0.264887	0.465005	1.20154
Barx2	330.43	318.656	365.621	237.543	248.5	384.966	302.69	316.323	236.462	292.095	242.814	367.166	303.605	-0.0816241	0.773958	1.05821
Ppfia2	224.801	161.735	125.924	211.629	324.13	226.048	104.133	106.32	127.054	178.694	209.978	237.018	186.455	0.701269	0.00463207	0.615031
Batf	125.943	90.4944	127.028	120.067	121.249	123.299	169.436	196.823	158.818	164.948	154.675	130.148	140.244	-0.0919256	0.79702	1.06579
1810032O08Rik	654.766	622.871	609.736	1100.47	1014.41	837.061	563.022	593.105	610.565	1051.54	1019.65	911.037	799.019	0.700985	1.31329e-19	0.615152
Bax	3219.66	2452.01	2632.25	2875.57	3030.01	2672.84	3217.52	2846.91	2781.07	2853.37	2552.58	2659.04	2816.07	-0.0440026	0.755474	1.03097
Baz1a	3430.92	3489.81	3130.42	3718.63	3406.96	3620.87	3346.36	3331.06	2877.54	3428.4	3698.38	2986	3372.11	0.0889941	0.37518	0.940178
Ccdc88b	98.181	61.6132	101.623	138.207	136.855	83.5691	72.3633	76.4447	116.466	175.257	161.588	155.543	114.809	0.699807	0.00366773	0.615654
Baz2a	6265.3	5959.15	6551.35	6037.91	6033.62	6227.96	6582.41	6424.87	6822.09	6396.31	6228.49	6351.86	6323.44	-0.0502317	0.382236	1.03543
Baz2b	3812.81	3612.07	4304.61	3711.72	3250.9	4399.02	4389.45	3971.61	4485.71	4180.97	3982.67	4631.37	4061.08	-0.0247269	0.897987	1.01729
Doc2b	545.074	439.957	447.361	781.732	823.53	669.923	445.652	451.639	382.338	802.976	750.91	576.673	593.147	0.697356	9.02215e-10	0.616701
Bbip1	1316.3	1523	1270.28	1226.59	1248.5	1286.42	1332.54	1426.09	1404.65	1218.78	1474.17	1248.58	1331.33	-0.101896	0.279671	1.07318
Bbof1	67.711	58.7251	65.1711	56.1465	68.4274	82.1992	66.186	50.0845	98.8198	57.2736	77.7697	69.8356	68.1958	0.0217575	0.962346	0.985032
Bbox1	25.7302	41.3964	32.0333	37.1431	37.2149	43.8395	27.3569	28.1176	34.1164	59.5645	47.5259	45.4989	38.2948	0.529808	0.0546681	0.692647
Cth	463.143	472.689	467.244	771.367	743.098	778.152	492.423	597.499	525.862	872.849	938.421	769.25	657.666	0.692353	4.27044e-14	0.618844
Bbs10	240.374	253.192	268.417	265.184	243.698	319.207	254.154	296.992	292.93	280.641	331.817	270.877	276.457	0.0948965	0.572608	0.936339
Bbs12	540.334	769.202	600.9	658.21	679.472	746.642	622.148	624.738	716.443	688.429	736.22	634.869	668.134	0.09889	0.492489	0.933751
Bbs2	642.578	674.857	617.469	602.927	711.885	702.803	731.575	715.241	842.321	746.848	741.405	727.983	704.824	0.00404966	0.984233	0.997197
Bbs4	847.742	963.669	822.923	812.829	809.124	771.302	969.845	961.27	976.434	855.667	966.073	847.55	883.702	-0.128029	0.20475	1.0928
Bbs5	368.348	453.435	416.432	380.069	415.366	395.926	360.052	383.981	416.455	407.788	476.124	338.597	401.048	0.0126223	0.956035	0.991289
Adgrg6	1092.86	1726.13	1347.61	2515.36	2418.97	2272.81	1475.51	1671.24	2289.32	2584.18	2719.35	2989.17	2091.88	0.691765	1.50557e-05	0.619096
Nat8l	261.365	179.063	215.396	360.201	399.76	228.788	282.393	296.992	316.459	664.374	439.831	410.549	337.931	0.69084	0.00726885	0.619493
Lama1	784.094	853.921	873.735	1126.39	1174.07	1111.06	632.738	767.962	841.145	1548.68	1373.07	1328.99	1034.65	0.690059	3.42853e-10	0.619829
Bcam	7092.05	5447.96	7016.39	4331.06	4722.69	8047.3	8042.92	7686.65	6853.86	6862.52	5487.95	6781.46	6531.07	-0.218132	0.296245	1.16323
Bcap29	838.94	1081.12	783.158	837.015	773.11	795.962	757.167	759.175	741.148	688.429	876.206	560.801	791.019	-0.130219	0.512895	1.09446
Bcap31	2801.88	3150.94	2776.95	3294.5	3001.2	2860.53	2804.52	2988.37	2799.89	2857.95	2995.86	3006.1	2944.89	0.057404	0.468734	0.960992
Bcar1	2635.31	2190.16	2594.69	2526.59	2656.66	2697.5	2676.56	2509.5	2422.26	2709.04	2323.59	2932.04	2572.83	0.0754106	0.477745	0.949072
Abhd14b	470.592	494.831	514.741	800.736	899.16	876.791	703.336	571.139	770.559	1042.38	1014.46	1046.48	767.1	0.689834	1.35184e-06	0.619925
Bcas1	15.5735	13.4779	13.2551	19.8672	25.2101	23.2898	20.297	27.2389	16.47	12.6002	19.8745	17.988	18.7618	0.148612	0.802408	0.902118
Gm16574	117.817	93.3825	110.46	171.895	175.27	156.178	105.898	87.8675	152.935	178.694	171.958	219.03	145.115	0.68951	2.63038e-05	0.620065
Bcas3	996.706	904.944	979.776	1103.93	1027.61	1050.78	1173.7	1052.65	1001.14	1198.16	1145.81	1210.48	1070.47	0.14134	0.143761	0.906677
Bcat1	843.679	743.209	776.53	743.725	764.706	631.564	572.729	689.76	659.975	445.588	485.629	584.079	661.765	-0.23033	0.260677	1.1731
Sfrp2	9260.16	9188.07	10716.8	13318	19680.7	14741	12048.5	11585.3	11489	19907.2	16082.8	19895.7	13992.8	0.688772	2.16311e-08	0.620382
Bccip	3286.02	3770.92	3065.25	3817.1	3555.82	3241.39	3049.85	3201.89	3104.59	3306.98	3713.94	2880.19	3332.83	0.0751323	0.561148	0.949255
Bcdin3d	339.232	302.29	312.6	307.51	327.731	364.416	339.755	347.955	359.986	373.424	300.71	376.689	337.692	0.0300336	0.869425	0.979397
Naip2	34.5326	30.8066	29.8241	39.7345	46.8188	56.1694	27.3569	21.9669	18.8228	43.5279	43.2054	38.0921	35.9048	0.688454	0.00888135	0.620518
Bckdha	1920.28	1414.22	1904.32	1503	1567.83	1606.99	2259.15	1974.38	2182.27	1854.52	1501.82	1947.99	1803.06	-0.223637	0.132901	1.16767
Bckdhb	1492.35	1424.81	1369.7	1414.89	1236.5	1356.29	1421.67	1413.79	1324.66	1255.44	1220.12	1115.25	1337.12	-0.153881	0.0525526	1.11256
Bckdk	2940.69	2502.07	2785.79	2593.11	2775.51	3035.89	2976.6	2868.87	2921.07	2899.19	2605.29	2925.69	2819.15	-0.0148865	0.908845	1.01037
Bcl10	1860.02	2042.86	1764.04	2099.88	1825.93	1719.33	1592.88	1650.15	1461.12	1814.43	1758.46	1446.44	1752.96	0.0401962	0.838898	0.972523
Bcl11a	5504.23	5574.07	5475.48	5225.94	5174.07	5970.4	4538.59	4294.96	4476.3	4234.81	4536.57	4324.52	4944.16	-0.0196097	0.932816	1.01369
Bcl11b	4206.21	3919.18	3808.64	4147.07	3660.27	4560.68	4389.45	4093.75	4055.14	4272.61	4508.92	4586.93	4184.07	0.0724263	0.454249	0.951037
Bcl2	3642.85	4151.19	4121.24	3734.17	3404.56	4266.14	3501.68	3262.52	3182.23	3557.84	4222.9	3619.81	3722.26	0.0609976	0.687772	0.958601
Bcl2a1a	17.6049	10.5898	15.4643	23.3224	26.4106	31.5097	7.94231	13.1801	21.1757	5.72736	11.2334	21.1623	17.1102	0.468231	0.479309	0.72285
Bcl2a1b	25.7302	13.4779	30.9287	30.2327	24.0096	36.9896	31.7693	16.6948	14.1171	26.3458	24.195	35.9759	25.8722	0.409486	0.353011	0.752892
Bcl2l1	2820.84	2566.58	2901.77	2297.69	2248.5	2971.5	2915.71	2855.69	2761.07	2604.8	2492.09	2906.64	2695.24	-0.116792	0.287061	1.08432
Gm5373	24.376	12.5152	19.8827	35.4155	30.012	34.2496	27.3569	21.9669	19.9992	33.2187	33.7002	38.0921	27.5654	0.688442	0.0191692	0.620524
Bcl2l12	1585.79	1330.46	1475.74	1337.15	1340.94	1317.93	1745.54	1510.44	1512.88	1514.31	1253.82	1449.62	1447.89	-0.158467	0.092753	1.1161
Zscan22	726.539	767.277	685.954	1272.37	1230.49	1124.76	768.64	844.406	810.557	1270.33	1298.75	1209.43	1000.79	0.687834	1.09099e-27	0.620785
Mttp	300.637	383.157	349.052	578.741	607.443	705.543	367.111	388.374	451.748	564.718	530.562	613.707	486.733	0.686356	3.83711e-10	0.621421
Fam69c	321.627	405.299	446.256	671.167	558.224	438.395	254.154	295.235	327.046	449.025	535.747	638.043	445.018	0.686335	6.69473e-05	0.621431
Bcl3	78.5448	71.2403	91.6814	109.702	90.0361	95.899	82.0706	83.4741	67.0563	106.529	74.3133	120.625	89.2643	0.330562	0.10445	0.795227
Bcl6	314.179	354.276	377.772	371.431	398.56	309.617	501.248	445.488	482.335	399.77	359.469	411.607	393.813	-0.134782	0.51019	1.09793
Bcl6b	1003.48	1209.16	1234.94	1122.07	919.568	885.011	983.082	918.215	902.319	986.251	932.373	1210.48	1025.58	-0.0446218	0.836713	1.03141
Bcl7a	5481.21	4804.87	5101.02	4857.11	5073.23	5479.94	5392.83	5253.6	5148.04	5411.21	5231.31	5180.53	5201.24	0.00150457	0.988889	0.998958
Bcl7b	980.456	864.51	957.684	1018.41	998.8	968.58	1030.74	1023.66	944.67	975.942	826.087	955.478	962.084	-0.0164712	0.911993	1.01148
Bcl7c	5381	5105.23	5400.37	5540.36	5859.55	5911.49	5687.58	5467.99	5251.57	5769.74	5332.41	5415.43	5510.23	0.0661152	0.250754	0.955207
Bcl9	8155.12	6864.1	8083.43	7340.51	7849.94	8639.13	8689.77	8542.48	8672.61	8737.66	7335.41	9257.45	8180.63	0.00429488	0.981656	0.997027
Bcl9l	7669.63	6109.33	7939.83	7342.24	8438.18	8252.8	8808.91	8459	8433.8	8832.73	6890.4	10416.1	8132.74	0.0812924	0.665235	0.945211
Bclaf1	13524.6	15197.3	13656.1	13934.7	12949.6	15171.2	12721.8	12260.1	12327.8	12853.3	14760.7	13487.8	13570.4	0.0614652	0.569205	0.95829
Bco1	16.2506	17.3287	16.5689	25.9138	36.0144	20.5498	15.8846	22.8455	17.6464	28.6368	17.2822	19.0461	21.164	0.461501	0.251739	0.72623
Bcor	5569.91	5521.12	5189.39	5460.9	5117.65	6219.74	5462.55	5400.34	4918.64	5664.36	5142.31	6121.19	5482.34	0.072323	0.439761	0.951105
Neb	83.2846	68.3522	68.4849	99.3361	123.65	123.299	77.6582	57.1139	67.0563	84.7649	127.888	122.741	91.969	0.685028	0.000100927	0.621994
Glis3	186.205	230.087	213.187	279.005	334.934	335.647	223.267	231.091	191.757	327.605	400.946	370.34	277.006	0.684315	2.71188e-09	0.622301
Bcs1l	716.383	684.484	710.255	697.081	714.286	637.043	690.099	682.73	718.796	721.647	678.325	646.508	691.47	-0.0362531	0.696808	1.02545
Bdh1	1177.49	1031.06	1046.05	1133.3	1063.63	1011.05	1021.03	1050.02	855.262	982.815	997.181	979.814	1029.06	-0.00479446	0.978927	1.00333
Bdh2	134.068	152.108	181.154	139.934	178.872	145.219	136.784	178.371	210.58	214.203	198.745	167.182	169.768	0.0788993	0.789025	0.94678
Bdkrb2	52.8146	46.2099	44.1838	55.2827	44.4178	45.2095	37.9466	33.3896	30.5871	42.3825	21.6027	28.5691	40.2163	-0.0572645	0.924166	1.04049
Cx3cr1	253.916	269.558	275.044	346.381	456.183	405.516	262.979	266.238	251.755	451.316	452.793	426.42	343.175	0.683628	2.87515e-14	0.622598
Bdp1	2600.78	2351.89	2849.86	2505	2067.23	3363.32	2585.66	1946.26	2396.38	2478.8	2280.38	3020.92	2537.21	0.0930391	0.660765	0.937546
Bean1	123.234	134.779	176.735	218.539	169.268	101.379	137.667	112.47	136.465	172.966	151.219	181.996	151.393	0.286046	0.249345	0.820147
Becn1	4419.5	4657.57	4560.87	4388.07	4372.15	4348.34	4410.63	4403.04	4385.72	4392.88	4593.6	4075.86	4417.35	-0.0357619	0.533351	1.0251
Begain	2441.66	2087.15	2139.6	2868.65	3160.87	2267.33	2095.01	2069.28	1598.76	2494.84	1765.37	1859.11	2237.3	0.213146	0.30826	0.862654
Bend3	2529.68	2297.02	2305.29	2618.15	2527.01	2705.72	2282.09	2302.13	2077.57	2509.73	2359.88	2372.29	2407.21	0.128013	0.072629	0.915091
Gm8773	26.4073	23.105	23.1965	37.1431	43.2173	27.3997	20.297	13.1801	16.47	28.6368	32.8361	28.5691	26.7048	0.683278	0.0335142	0.622749
Gm8719	65.6797	45.2472	79.5308	139.071	98.4394	95.899	60.0086	54.4778	65.8799	82.474	108.014	67.7194	80.2033	0.68243	0.00458516	0.623115
Bend6	101.567	53.9116	58.5435	73.4224	144.058	57.5394	68.8334	61.5072	64.7034	104.238	108.014	63.4869	79.9853	0.423061	0.239564	0.74584
Bend7	88.0243	101.084	109.355	73.4224	58.8236	83.5691	108.545	95.7756	88.2319	97.3651	103.693	67.7194	89.634	-0.281175	0.220556	1.21518
Sync	20.9904	24.0677	17.6735	34.5517	33.6135	34.2496	29.1218	26.3602	28.2342	54.9826	37.1566	40.2084	31.7675	0.681491	0.0167941	0.623521
Best2	21.6675	10.5898	13.2551	10.3655	19.2077	17.8098	27.3569	18.4522	19.9992	14.8911	12.9616	16.9298	16.9572	-0.300431	0.58517	1.23151
Bet1	1568.19	2148.76	1812.64	1717.22	1699.88	1589.18	1640.53	1743.29	1683.47	1662.08	1927.83	1748.01	1745.09	-0.0334925	0.833673	1.02349
Bet1l	1306.82	1173.54	1389.58	1357.88	1375.75	1164.49	1314.89	1398.85	1352.89	1308.13	1288.39	1176.62	1300.65	-0.0477429	0.6639	1.03365
Bex1	1258.07	1091.71	1080.29	1179.08	1106.84	1185.04	1117.22	975.329	977.61	964.487	946.198	834.853	1059.73	-0.0660099	0.713271	1.04682
Bex2	1922.32	1447.91	1564.11	1485.72	1482.59	1771.39	1968.81	1729.23	1731.7	1557.84	1468.12	1684.52	1651.19	-0.134776	0.269468	1.09792
Bex3	6084.51	5522.08	5661.05	6539.77	6220.89	6510.17	6757.14	6451.23	6629.16	6555.53	5715.21	6647.08	6274.49	0.0413565	0.713848	0.971741
Bex4	1222.18	1290.03	1139.94	1179.94	1074.43	1115.17	1045.74	1040.35	947.023	1046.96	1115.56	891.991	1092.44	-0.058043	0.721061	1.04105
Bfar	2228.37	2560.8	2493.07	2365.06	2361.35	2307.06	2451.53	2628.12	2856.36	2219.92	2613.06	2282.35	2447.25	-0.103534	0.256672	1.0744
Bfsp1	104.275	118.413	134.761	100.2	110.444	110.969	125.312	147.617	125.878	104.238	81.2262	128.032	115.947	-0.254533	0.193254	1.19295
Bglap3	404.912	414.926	421.955	376.614	387.755	354.826	398.881	376.073	415.278	320.732	419.092	307.911	383.246	-0.16255	0.169221	1.11926
Bgn	17581.2	21953.6	23595.3	18032.5	18359	21371.8	18878.9	20335.2	20962.7	17048.1	16725.7	21463.9	19692.3	-0.125909	0.325653	1.09119
Bhlha15	58.9086	56.7997	44.1838	88.1068	82.8332	71.2393	24.7094	42.1764	28.2342	44.6734	39.749	47.6152	52.4357	0.544915	0.177173	0.685432
Bhlhb9	3311.75	4207.99	3354.66	3517.36	3561.83	3489.35	3275.76	3372.35	3329.29	3412.36	3963.66	3216.67	3501.09	0.0215754	0.892198	0.985156
Gapdhs	115.786	89.5317	100.518	145.117	160.864	158.918	99.7202	85.2315	95.2905	153.493	162.452	164.008	127.578	0.681342	3.70466e-08	0.623585
Rec114	20.3133	33.6947	32.0333	44.9172	48.0192	53.4295	30.0043	26.3602	28.2342	48.1098	46.6618	30.6853	36.8719	0.679635	0.0101897	0.624323
Bhmt2	29.7929	25.0304	29.8241	20.731	28.8115	46.5795	34.4167	22.8455	34.1164	40.0915	35.4284	44.4408	32.6757	0.286588	0.46975	0.819839
Bicc1	3933.33	4113.64	4517.79	3487.13	3788.72	3786.64	2942.19	3378.5	3725.74	3203.88	3041.66	3631.45	3629.22	-0.110911	0.481756	1.07991
Bicd1	352.097	361.978	317.019	291.098	286.915	331.537	358.287	265.36	301.165	312.714	356.013	303.679	319.822	-0.0570674	0.759568	1.04035
Bicd2	4128.34	4203.18	4370.88	4141.88	4488.6	4403.13	4132.65	4368.77	3826.91	4463.9	4453.61	4540.37	4293.52	0.0812794	0.150575	0.945219
Bicdl1	335.17	270.52	273.94	289.37	279.712	260.297	360.934	304.9	347.046	384.878	292.933	335.422	311.26	-0.0389494	0.875324	1.02737
Bicdl2	42.6579	27.9185	44.1838	30.2327	38.4154	57.5394	52.9488	50.9631	28.2342	46.9643	50.1183	35.9759	42.1794	0.0550404	0.921284	0.962567
Bid	780.031	747.06	715.778	887.115	828.332	708.283	708.631	698.546	619.976	883.159	844.234	667.67	757.401	0.174279	0.142222	0.88621
Grid2	69.0652	123.226	141.388	171.895	222.089	135.629	113.84	118.621	116.466	202.748	172.822	181.996	147.482	0.679371	0.000755953	0.624438
Bin1	3671.97	3341.55	3500.46	3686.67	3547.42	3540.04	3648.17	3700.1	3598.69	3664.36	3291.39	3858.94	3587.48	0.00809615	0.939041	0.994404
Bin2	62.2941	78.9419	138.074	89.8344	105.642	78.0892	107.662	72.93	77.6441	72.1647	79.4979	94.1722	88.079	-0.0431292	0.927915	1.03035
Bin3	1157.86	1149.47	1127.79	1112.56	935.175	1152.16	1127.81	1166.88	1104.66	1027.49	1038.66	1088.8	1099.11	-0.105734	0.147622	1.07604
Birc2	2165.4	2482.82	2484.23	2158.62	2178.87	2459.12	2344.75	2248.53	2478.73	2257.72	2584.55	2284.47	2343.98	-0.0278671	0.814387	1.0195
Birc3	641.901	800.009	793.099	745.453	643.458	660.333	636.268	667.793	805.852	665.519	694.743	693.065	703.958	-0.0782334	0.570277	1.05572
Tgm2	927.641	1045.5	1078.08	1877.88	1788.72	1138.46	1043.09	1081.65	1088.19	1909.5	1738.59	1554.37	1355.97	0.677371	1.58799e-08	0.625304
Klf14	115.786	140.555	177.84	257.41	250.901	253.447	146.492	177.492	177.64	225.658	209.978	292.04	202.103	0.676663	4.90028e-06	0.625611
Bivm	1196.45	1310.24	1133.31	1291.37	1261.71	1131.61	1188.7	1269.69	1281.13	1190.15	1353.19	1102.56	1225.84	-0.00762618	0.960952	1.0053
Blcap	2216.18	2117.95	2113.09	2407.39	2475.39	2194.72	2360.63	2223.93	2399.91	2509.73	2357.29	2447.42	2318.64	0.100244	0.128915	0.932875
Blm	2982.67	3181.74	2803.46	2452.31	2557.02	2930.4	2629.79	2595.61	2266.97	2272.62	2555.17	2428.37	2638.01	-0.116164	0.365441	1.08385
Blmh	7545.72	8055.93	7425.09	7204.89	6924.37	7314.35	7168.38	7426.56	7542.07	6498.26	7414.05	6564.54	7257.02	-0.107351	0.0703543	1.07725
Gm14391	790.188	640.2	1022.86	1293.96	1136.86	1512.46	1001.61	588.712	1129.37	1419.24	1281.47	1601.99	1118.24	0.673589	0.000147239	0.626945
Bloc1s1	1049.52	818.3	923.441	1084.92	1068.43	954.88	1200.17	1172.15	1121.13	1174.11	1123.34	1104.67	1066.26	0.0511159	0.780243	0.965189
Bche	239.02	263.782	249.638	384.388	396.159	423.326	312.398	384.86	358.81	477.662	519.329	679.31	390.723	0.67288	0.000435656	0.627253
Bloc1s3	538.98	450.547	522.473	542.462	566.627	513.745	562.139	564.988	514.098	499.426	503.775	525.883	525.429	-0.00238102	0.988906	1.00165
Bloc1s4	489.551	403.374	529.101	525.186	533.014	413.736	544.49	601.892	503.51	525.772	452.793	512.128	502.879	-0.0515363	0.795939	1.03637
Bloc1s5	844.357	828.89	804.145	721.267	773.11	815.142	897.482	814.532	854.085	821.303	844.234	749.145	813.974	-0.0957149	0.234957	1.06859
Bloc1s6	2029.3	2424.09	2185.99	1992.77	1957.98	2160.47	2059.71	2246.77	2135.21	1966.77	2099.78	1850.64	2092.46	-0.120856	0.110104	1.08738
Blvra	1033.95	1001.21	916.814	946.717	1019.21	932.96	1054.56	1047.38	1005.84	878.577	960.888	843.318	970.119	-0.119863	0.13298	1.08663
Blvrb	743.467	606.505	790.89	703.127	714.286	657.593	904.541	782.021	817.616	851.085	643.76	944.897	763.316	-0.0409681	0.867072	1.0288
Blzf1	1011.6	1179.32	994.136	1032.23	981.993	963.1	963.667	995.539	1024.67	988.542	1135.44	899.398	1014.14	-0.0380012	0.776417	1.02669
Bmf	2199.25	2412.54	2433.42	1996.22	2692.68	2367.34	2386.22	2452.38	2312.85	3016.03	3264.6	3063.24	2549.73	0.208367	0.143978	0.865516
Bmi1	3250.81	3751.67	3381.17	2981.81	2980.79	3287.97	3206.05	3253.73	3174	2936.99	3438.29	2808.24	3204.29	-0.118765	0.167339	1.08581
Bmp1	14079.2	12504.6	14211.7	15290.9	16050.4	12706.6	14038.5	14146.7	13885.4	15555.5	14291.5	15828.3	14382.4	0.114777	0.171677	0.923525
Bmp2	963.528	838.517	832.865	963.129	1070.83	798.702	503.896	725.785	636.446	903.777	680.917	1010.5	827.408	0.269238	0.208764	0.829758
Tbx4	57.5544	43.3218	79.5308	108.838	142.857	61.6494	57.3612	38.6617	54.1156	82.474	69.9928	59.2544	71.3009	0.671022	0.0422616	0.628061
Bmp3	1182.91	1189.91	1295.69	2282.14	1903.96	1504.24	1791.43	2014.8	1917.57	2081.32	2398.76	1907.78	1789.21	0.363626	0.0732327	0.777209
Bmp4	4179.12	4242.65	4726.56	4800.96	4345.74	5321.03	4176.77	4223.79	4392.77	3875.13	3596.42	3894.92	4314.66	-0.00620879	0.977581	1.00431
Bmp5	282.355	479.428	334.692	381.796	286.915	226.048	296.513	456.032	623.506	180.985	278.243	415.839	353.529	-0.479261	0.123543	1.39403
Bmp6	1384.69	1353.57	1458.07	1412.3	1481.39	1298.75	1539.04	1599.19	1717.58	1547.53	1257.28	2003.01	1504.37	-0.00792285	0.976061	1.00551
Bmp7	3051.74	2686.91	2712.89	2562.01	2661.47	2986.57	3601.4	3727.34	3129.29	3664.36	3135.85	2991.29	3075.93	-0.0712968	0.707813	1.05066
Matn2	1505.89	1724.21	1775.08	2671.71	2809.13	2297.47	2497.42	2634.27	2924.59	4423.81	4463.12	4069.51	2816.35	0.667	0.0193096	0.629815
Bmp8b	52.1375	51.0234	55.2298	50.1	60.024	72.6093	58.2436	41.2977	54.1156	75.6011	74.3133	65.6031	59.1915	0.349707	0.127	0.784744
Bmper	2109.88	2524.22	2077.74	1563.46	1710.69	2439.94	3822.02	3310.85	4335.13	2277.2	2464.44	2748.98	2615.38	-0.461205	0.0636842	1.37669
Bmpr1a	8251.27	8624.89	8783.74	8171.48	7992.8	9440.57	8061.45	7214.8	8140.87	8053.81	8444.06	8481.85	8305.13	0.0435719	0.668306	0.97025
Bmpr1b	91.4099	107.823	77.3217	111.429	73.2293	75.3492	123.547	111.592	125.878	105.383	126.16	120.625	104.146	-0.0485289	0.90348	1.03421
Bmpr2	6322.86	7352.19	6751.28	5901.43	5339.74	7206.13	5844.66	5635.82	6196.24	5793.8	6437.6	6280.97	6255.23	-0.0439862	0.778949	1.03096
Gm7997	21.6675	43.3218	50.8114	73.4224	40.8164	50.6895	24.7094	28.9963	35.2928	57.2736	54.4388	43.3827	43.7352	0.666367	0.0412923	0.630091
Bmt2	1765.9	2009.17	1870.08	1661.07	1491	1705.63	1817.91	1831.16	1806.99	1707.9	2002.14	1666.53	1777.96	-0.116025	0.221702	1.08374
Bmyc	920.193	715.291	870.421	984.723	943.578	952.14	949.548	913.822	943.494	989.688	737.084	944.897	905.406	0.0623713	0.704957	0.957689
Tnfrsf13b	35.2097	31.7693	20.9873	54.4189	46.8188	50.6895	33.5342	32.511	34.1164	46.9643	49.2542	51.8476	40.6768	0.665422	0.00298447	0.630504
Serpinb10	197.039	226.236	181.154	361.929	292.917	358.936	198.558	164.312	143.524	254.295	308.487	187.286	239.556	0.665006	0.000577313	0.630686
Bnip1	1384.01	1380.52	1427.14	1439.08	1470.59	1419.31	1428.73	1402.37	1452.89	1532.64	1339.37	1443.27	1426.66	0.0280728	0.712465	0.98073
Bnip2	4641.59	5158.18	4666.91	4860.56	4595.44	4616.85	4323.27	4313.41	4243.37	4583.03	4714.57	4157.33	4572.88	0.00959879	0.944048	0.993369
Bnip3	2283.89	2433.72	1857.93	2147.39	1949.58	2223.49	2103.83	1772.29	1528.18	2295.53	2352.97	2064.38	2084.43	0.120965	0.464807	0.919573
Bnip3l	6511.09	7701.65	6965.58	6191.66	6082.84	6440.3	6848.92	6896.72	6898.56	6490.24	7441.7	5951.9	6701.76	-0.115393	0.170105	1.08327
Bnipl	211.936	229.124	230.86	228.905	219.688	271.257	195.028	221.426	175.287	261.168	224.668	188.344	221.474	0.136635	0.430796	0.909638
Gata6	77.8677	71.2403	57.4389	120.931	133.253	67.1293	48.5364	35.147	61.1741	89.3468	68.2645	78.3005	75.7192	0.664055	0.0304705	0.631102
Bod1	2833.03	2234.44	2390.34	2627.66	2649.46	2479.67	2827.46	2826.7	2664.6	2722.79	2441.11	2443.19	2595.04	-0.0389261	0.762555	1.02735
Bod1l	4080.27	4180.07	4410.65	4006.27	3891.96	4763.44	4399.16	4063.87	4148.08	4175.24	4349.92	4652.53	4260.12	0.0312584	0.769115	0.978566
Bok	1597.98	1311.21	1386.27	1602.34	1702.28	1557.67	1401.38	1442.78	1322.3	1373.42	1150.13	1306.77	1429.54	0.0372459	0.849519	0.974514
Bola1	465.852	300.364	332.483	374.022	404.562	442.505	470.361	432.308	389.397	476.516	391.441	438.06	409.823	0.0755818	0.734642	0.948959
Bola2	1319.69	862.585	1071.46	1250.77	1238.9	1109.69	1355.49	1252.11	1185.84	1340.2	1030.88	1282.44	1191.67	0.040609	0.858927	0.972244
Bola3	622.941	672.932	606.423	705.718	689.076	602.794	649.505	615.072	562.332	654.064	648.945	610.532	636.695	0.0688565	0.509148	0.953393
Spata1	245.791	258.968	286.09	370.567	346.939	493.195	250.624	202.974	295.283	372.278	398.354	452.873	331.161	0.662682	1.91929e-07	0.631703
Scn5a	67.0339	43.3218	57.4389	87.243	105.642	91.7891	69.7159	57.9925	74.1148	103.092	83.8185	114.276	79.6233	0.660618	0.000414738	0.632607
Mctp2	138.808	129.965	143.597	180.533	205.282	301.397	156.199	143.224	129.407	222.222	235.037	191.519	181.432	0.660571	8.45441e-06	0.632628
Borcs6	589.763	424.554	489.336	551.1	477.791	516.485	600.968	545.657	530.568	553.263	441.559	576.673	524.81	-0.0314566	0.885632	1.02204
Borcs7	763.103	1080.16	852.747	904.391	819.928	849.391	854.24	889.219	962.316	838.485	966.073	865.538	887.132	-0.0399743	0.810924	1.0281
Borcs8	721.122	615.169	662.757	675.486	686.675	689.103	803.939	774.113	771.735	731.956	622.158	757.61	709.319	-0.0644725	0.644038	1.0457
Bpgm	1633.19	1772.34	1673.46	1587.65	1523.41	1628.91	1678.48	1598.31	1581.12	1412.37	1577.86	1423.16	1590.86	-0.118498	0.0747905	1.0856
Bphl	483.457	546.817	551.193	527.777	498.2	593.204	600.086	590.469	615.271	513.171	550.437	586.196	554.69	-0.0494577	0.726459	1.03488
Bpifc	61.617	67.3894	51.916	46.6448	51.6207	39.7296	58.2436	73.8087	81.1734	45.8189	74.3133	41.2665	57.7952	-0.382544	0.168569	1.30364
Gstp2	48.0748	44.2845	60.7527	116.612	96.0385	90.4191	72.3633	57.9925	71.762	99.656	57.8952	98.4047	76.1879	0.658918	0.00629182	0.633353
Bptf	10557.5	9891.81	11448	9709.03	9522.21	11824.3	11343.4	10870.1	11165.5	10605.9	10046.1	11812.8	10733.1	-0.0394494	0.748411	1.02772
Braf	2803.24	2868.87	2976.88	2706.26	2277.31	3066.03	2906.89	2468.2	3019.89	2830.46	2826.5	2921.46	2806	-0.035395	0.809591	1.02484
Brap	3348.31	3415.68	3460.7	3671.98	3589.44	3600.32	3311.06	3347.75	3099.88	3436.42	3309.53	3280.16	3405.94	0.0632412	0.320193	0.957111
Brat1	1516.73	1397.85	1644.74	1660.21	1771.91	1606.99	1652.88	1670.36	1731.7	1774.34	1654.77	1953.28	1669.65	0.117026	0.215964	0.922086
Brca1	3203.41	2970.91	2841.02	2848.79	2906.36	3297.56	2732.16	2629	2484.61	2731.95	3143.63	2970.13	2896.63	0.0852002	0.431537	0.942654
Brca2	2180.97	1976.44	2332.9	1908.98	1845.14	2407.07	2184.14	2012.17	2089.33	1996.56	1994.36	2198.76	2093.9	-0.0496331	0.697445	1.035
Brcc3	1579.02	1791.6	1649.16	1603.2	1540.22	1672.75	1546.99	1528.89	1602.29	1498.28	1706.61	1359.68	1589.89	-0.0473785	0.681811	1.03339
Brd1	5681.63	5885.02	5756.04	5976.58	5971.19	5827.92	5500.49	5706.11	5325.68	6219.91	5963.21	5762.49	5798.02	0.0772325	0.0787301	0.947874
Brd2	17378	17931.4	17894.4	18248.5	19027.6	17894.8	18490.6	18936.3	18820.5	19664.3	19250.6	19052.4	18549.1	0.0479651	0.358915	0.9673
Brd3	12758.1	13120.7	13119.3	12936.2	13542.6	14230	13214.2	13159.9	12803	13947.3	13408.4	14411.5	13387.6	0.0769624	0.0652557	0.948052
Brd4	9771.38	8863.64	10012	9696.93	10356.5	10825.6	10386.8	10313.9	9591.4	10680.4	9511.24	12170.4	10181.7	0.101438	0.281564	0.932104
Brd7	4968.64	5599.1	4958.53	4990.13	4767.11	5284.04	4755.68	4739.57	4706.88	4823.58	5469.8	4582.7	4970.48	0.00919326	0.946964	0.993648
Abcg5	81.2532	62.5759	71.7987	159.802	122.449	86.3091	114.722	98.4116	111.76	168.384	178.87	133.322	115.805	0.658173	0.00902266	0.63368
Brd9	3377.43	3694.87	3606.5	3475.04	3677.07	3297.56	3467.26	3623.65	3478.69	3445.58	3549.76	3419.83	3509.44	-0.0254369	0.70913	1.01779
Rccd1	971.653	901.093	898.036	1449.44	1554.62	1357.66	933.663	882.19	927.024	1452.46	1484.54	1400.94	1184.44	0.657343	5.04121e-42	0.634045
Bre	881.598	874.137	836.178	936.351	888.356	1038.45	839.238	890.098	852.909	928.978	807.077	1014.73	899.008	0.114796	0.210294	0.923513
Cacng4	1451.72	1064.75	920.128	1575.56	1615.85	1567.26	1186.93	946.333	895.26	1925.54	1767.1	1746.95	1388.62	0.655858	2.32708e-07	0.634698
Brf2	666.277	562.221	647.293	668.575	600.24	646.633	633.62	611.558	627.035	632.3	610.924	657.089	630.314	0.0251579	0.834004	0.982713
Bri3	1402.3	1056.09	1313.36	1270.64	1153.66	1259.02	1516.1	1449.81	1403.48	1390.6	1078.41	1354.39	1303.99	-0.11776	0.411629	1.08505
Map4k1	204.487	149.219	148.016	217.676	279.712	323.317	210.913	178.371	197.64	289.804	274.786	333.306	233.937	0.652634	1.37134e-05	0.636118
Brinp1	620.233	567.034	588.749	355.019	513.806	567.174	775.699	663.399	639.976	642.61	681.781	682.484	608.164	-0.163839	0.48528	1.12026
Brinp2	140.162	39.471	25.4057	47.5086	105.642	34.2496	77.6582	59.7499	39.9985	43.5279	45.7977	45.4989	58.7225	-0.25704	0.726178	1.19502
Brinp3	63.6484	36.5828	37.5562	9.50172	19.2077	12.3299	15.0021	12.3014	23.5285	18.3275	24.195	12.6974	23.7399	-0.975089	0.0883959	1.96576
Rab6b	696.746	623.834	618.573	1087.51	1177.67	804.182	698.041	700.304	619.976	1137.45	1081	933.257	848.213	0.652327	6.68294e-11	0.636253
Acaa1a	1801.79	1691.48	1841.36	2365.93	3238.9	3107.13	2046.47	2094.76	2059.92	2761.73	3215.35	3431.47	2471.36	0.651382	4.09486e-11	0.63667
Brk1	3707.86	3723.75	3703.71	4052.91	3884.76	3823.63	3784.95	3983.03	3775.15	3909.49	4010.33	3734.09	3841.14	0.0468084	0.351839	0.968076
Brms1	996.029	861.622	914.605	987.315	932.774	954.88	1006.91	1026.29	948.199	1013.74	870.157	1015.79	960.693	0.00330261	0.982573	0.997713
Brms1l	3057.83	3421.46	3053.1	3402.48	3308.53	2904.37	3021.61	3028.79	2925.77	3160.36	3467.67	2955.31	3142.27	0.0535416	0.586984	0.963568
Brox	2861.47	3283.79	2903.98	2730.45	2667.47	2759.15	2669.5	2823.18	2658.72	2544.09	3113.38	2540.53	2796.31	-0.0723473	0.506953	1.05143
Brpf1	3986.15	3544.68	3837.36	3917.3	4106.85	3848.29	3857.32	3938.22	3804.56	4151.19	3789.11	4042	3901.92	0.0538904	0.37479	0.963335
Brpf3	2987.41	2814.95	3127.11	2894.57	2974.79	3030.41	3290.77	3333.69	3313.99	3442.14	3079.68	3581.72	3155.94	0.0104148	0.947503	0.992807
Brsk1	1883.72	1439.25	1625.96	1646.39	1960.39	1680.97	1707.6	1655.42	1599.94	1786.94	1522.56	1661.24	1680.86	0.0478012	0.7297	0.96741
Brsk2	167.246	8.66436	15.4643	13.8207	94.838	17.8098	63.5385	8.78675	12.9407	6.87283	15.5539	16.9298	36.8722	-0.747834	0.563523	1.67927
Brwd1	7038.56	6581.06	7426.19	7207.48	6386.56	7513	7322.81	6247.38	7349.13	7365.38	6988.04	7619.49	7087.09	0.0379496	0.723118	0.974038
Brwd3	1514.02	1645.27	1694.45	1652.44	1346.94	1972.78	1477.27	1254.75	1447	1553.26	1696.24	1652.78	1575.6	0.128553	0.365975	0.914748
Slc8a1	413.714	376.418	412.014	656.482	709.484	567.174	480.069	331.26	472.923	728.52	592.778	645.45	532.191	0.650622	4.78275e-09	0.637006
Raet1d	125.943	121.301	136.97	220.267	236.495	173.988	139.432	130.923	119.995	198.167	222.076	160.833	165.532	0.648782	8.43992e-07	0.637818
Bsg	12511	11155.8	11593.8	12030.9	11836.7	11818.9	12638.9	12195.1	12087.8	11408.9	10498.9	12360.9	11844.8	-0.0454537	0.573637	1.03201
Bsn	229.54	114.562	120.401	115.748	156.063	84.9391	172.966	138.831	141.171	168.384	121.839	170.356	144.567	-0.170955	0.646027	1.1258
Bspry	117.817	134.779	132.551	137.343	118.848	124.669	152.669	130.044	124.701	171.821	141.714	113.218	133.348	0.0302324	0.917055	0.979263
Kcnq4	330.43	246.453	338.006	453.491	501.801	449.355	295.631	260.088	318.811	455.898	474.395	468.745	382.759	0.648541	1.0458e-11	0.637925
Bst2	127.297	117.45	160.166	134.752	128.451	106.859	144.727	134.437	170.582	132.875	109.742	124.858	132.683	-0.203719	0.269294	1.15166
Btaf1	3256.9	2887.16	3476.16	3406.8	3043.22	3708.55	3051.61	2519.16	2935.18	3127.14	2946.61	3201.86	3130.03	0.100249	0.429104	0.932872
Btbd1	3562.28	4414.97	3746.79	3822.28	3834.34	3671.56	3493.74	3723.82	3558.69	3836.18	4132.16	3326.71	3760.29	0.00819876	0.960955	0.994333
Btbd10	1102.34	1317.95	1136.63	1137.61	1192.08	1093.25	1274.3	1306.59	1270.54	1164.94	1209.75	1071.87	1189.82	-0.107593	0.214755	1.07743
Btbd11	1341.36	1222.64	1245.98	1445.12	1488.6	1526.16	1219.59	1093.95	1123.49	1290.95	1199.38	1263.39	1288.38	0.178605	0.0746631	0.883557
Btbd16	12.188	9.62706	17.6735	8.63792	10.8043	17.8098	19.4145	14.0588	23.5285	19.473	12.9616	19.0461	15.4353	-0.119944	0.870964	1.08669
Khsrp	8102.98	7548.58	8103.31	12281.4	12304.9	12728.5	8239.71	8118.08	7845.58	12555.5	11016.5	14296.2	10261.8	0.648437	4.91997e-29	0.637971
Btbd18	35.8868	38.5083	28.7195	22.4586	34.8139	21.9198	23.8269	21.9669	36.4692	36.6551	18.1463	25.3948	28.7305	-0.22711	0.621184	1.17049
Btbd19	330.43	373.53	302.659	356.746	332.533	313.727	350.344	351.47	370.574	329.896	340.459	341.771	341.178	-0.0408679	0.771879	1.02873
Btbd2	4104.64	3155.75	4056.07	3697.03	4060.03	4029.13	4503.29	4274.75	4418.66	4349.36	3506.55	4720.25	4072.96	-0.00911728	0.968612	1.00634
Adgrg2	176.049	189.653	171.212	205.583	314.526	194.538	122.665	120.378	109.408	243.985	249.727	187.286	190.418	0.64772	0.00208304	0.638288
Btbd6	721.122	558.37	634.038	730.768	771.909	713.763	675.097	729.3	739.972	789.23	752.638	827.446	720.304	0.175907	0.0838078	0.885211
Btbd7	2766	1778.12	2936.01	2513.64	2270.11	3515.38	3053.38	2159.78	2901.07	2894.61	2028.06	3449.45	2688.8	0.0960844	0.742417	0.935569
Btbd8	98.181	132.853	155.748	104.519	169.268	154.808	155.316	87.8675	97.6434	142.038	108.878	108.986	126.342	0.112063	0.760294	0.925264
Spta1	22.3446	34.6574	48.6022	54.4189	51.6207	45.2095	30.8868	24.6029	28.2342	38.946	60.4876	41.2665	40.1064	0.647089	0.0282627	0.638568
Btc	56.2002	70.2776	61.8573	54.4189	62.425	68.4993	75.8932	44.8124	56.4684	36.6551	58.7593	35.9759	56.8536	-0.209533	0.552327	1.15631
Btd	1144.99	1150.43	1259.24	1131.57	1190.88	1024.75	1228.41	1296.92	1365.83	1042.38	1002.37	1222.12	1171.66	-0.16961	0.0593992	1.12475
Btf3	17925.1	18574.5	17977.3	18825.5	17416.6	17819.4	17779.3	18641.1	17920.5	18045.8	18107.4	16868.5	17991.7	-0.0230375	0.682974	1.0161
Btf3l4	5248.96	6216.2	5257.87	4927.07	4896.76	4938.8	4959.53	5296.65	4945.69	4999.98	5767.92	4504.4	5163.32	-0.087854	0.42233	1.06279
Gm6685	67.0339	43.3218	54.1252	93.2896	124.85	91.7891	72.3633	45.6911	99.9962	108.82	90.7313	87.8235	81.6529	0.646218	0.0118155	0.638953
Btg2	1912.84	2031.31	1897.69	1819.15	1552.22	1794.68	1679.36	1625.55	1319.95	1494.84	1745.5	1293.02	1680.51	-0.110137	0.553242	1.07933
Btg3	371.734	259.931	328.065	255.683	129.652	161.658	215.325	194.187	164.7	154.639	200.473	78.3005	209.529	-0.64425	0.059266	1.56293
Btk	66.3568	86.6436	90.5768	90.6982	99.6399	90.4191	61.7736	70.294	77.6441	69.8738	89.0031	68.7775	80.1417	0.173445	0.500161	0.886723
Btla	34.5326	39.471	24.3011	67.3758	49.2197	26.0297	10.5898	46.5698	35.2928	12.6002	11.2334	64.545	35.1467	0.278131	0.756764	0.824659
Btn2a2	27.7615	32.732	35.347	37.1431	38.4154	32.8797	41.4765	20.2095	34.1164	38.946	39.749	39.1503	34.8272	0.252017	0.463626	0.839722
Btnl10	15.5735	23.105	20.9873	14.6845	10.8043	20.5498	23.8269	26.3602	19.9992	18.3275	19.8745	12.6974	18.8992	-0.418383	0.328186	1.33643
Psg16	1216.77	1569.21	1365.28	2352.11	2208.88	2011.14	1419.91	1568.43	1538.77	2082.47	2897.35	2014.65	1853.75	0.645914	2.09184e-09	0.639088
Btrc	2279.15	2202.67	2252.27	2446.26	2349.34	2286.51	2403.87	2362.76	2397.56	2497.13	2450.61	2313.04	2353.43	0.0465518	0.454965	0.968248
9030617O03Rik	178.757	148.257	185.572	212.493	292.917	253.447	167.671	154.647	191.757	286.368	281.699	275.11	219.058	0.642438	8.09907e-08	0.64063
Gm3636	377.828	478.465	477.185	631.432	662.665	590.464	361.817	376.073	439.983	734.247	769.92	520.593	535.056	0.64179	2.87516e-07	0.640917
Homer2	434.028	429.367	425.269	691.034	771.909	471.275	437.71	353.227	323.517	688.429	527.97	595.719	512.454	0.639611	8.79676e-06	0.641886
Trf	119.849	151.145	130.342	234.088	220.888	226.048	137.667	152.011	150.583	190.148	190.968	244.425	179.013	0.638061	1.23227e-07	0.642576
Bud31	2948.14	3107.62	2972.47	2916.16	2680.67	2601.6	2618.32	2876.78	2583.43	2836.19	3130.66	2357.48	2802.46	-0.0496698	0.711635	1.03503
Bves	77.1906	77.9792	75.1125	104.519	99.6399	54.7994	90.8954	79.9594	65.8799	106.529	94.1878	93.1141	84.9838	0.24788	0.306552	0.842133
C1qa	115.786	110.711	124.819	161.529	225.69	191.798	136.784	127.408	144.7	179.839	187.511	235.96	161.878	0.637933	4.65958e-06	0.642633
Bzw1	21694.6	25206.5	20436.1	23445.9	21989.2	21122.4	19440.1	20463.5	18312.2	21268	24179.5	18403.8	21330.2	0.054757	0.718218	0.962757
Bzw2	9280.47	10116.1	9265.34	9124.24	9016.81	9166.58	9029.53	9743.63	9334.94	8890.01	9556.17	7787.73	9192.63	-0.0844036	0.257259	1.06025
C130050O18Rik	33.1784	27.9185	40.87	25.9138	38.4154	20.5498	28.2393	37.783	37.6456	27.4913	21.6027	42.3246	31.8277	-0.219837	0.602011	1.1646
C130074G19Rik	1111.82	1179.32	1148.78	1052.1	1145.26	1161.75	991.024	1107.13	1096.43	829.322	996.317	1066.58	1073.82	-0.0865097	0.511378	1.0618
C1d	1970.39	2562.72	2066.7	2031.64	2024.01	1974.15	1922.92	2095.64	1898.75	1989.68	2490.36	1846.41	2072.78	-0.0180653	0.930975	1.0126
C1galt1	1606.11	1863.8	1832.52	1421.8	1390.16	1715.22	1510.8	1631.7	1812.87	1391.75	1532.06	1772.34	1623.43	-0.153045	0.183424	1.11191
C1galt1c1	528.823	656.566	627.41	563.193	542.617	446.615	500.366	465.698	547.038	453.607	600.555	450.757	531.937	-0.117731	0.517164	1.08503
Fignl1	2041.49	2229.63	1897.69	2924.8	3007.2	3242.76	1835.56	1870.7	1632.88	2684.99	3299.16	2754.27	2451.76	0.637732	2.83661e-14	0.642722
Gm7162	186.882	192.541	205.455	307.51	306.123	279.477	195.91	199.459	248.226	320.732	339.594	343.887	260.483	0.636988	1.74918e-10	0.643054
C1qbp	5351.88	5169.73	5080.03	6195.12	5318.13	5274.45	4499.76	4794.93	4225.72	5005.71	5026.52	4910.71	5071.06	0.123653	0.243443	0.917861
Slc4a1	159.798	168.474	196.618	317.876	241.297	275.367	160.611	95.7756	127.054	158.075	200.473	217.972	193.282	0.636259	0.00719314	0.643379
Agtr2	589.763	929.012	1377.43	1214.49	1595.44	1667.27	1344.02	1055.29	1159.96	1756.01	1937.33	1855.93	1373.5	0.636013	0.002223	0.643489
Thnsl1	240.374	277.259	191.095	462.129	344.538	301.397	223.267	180.128	222.345	408.933	318.856	232.785	283.592	0.63303	0.000999855	0.644821
Pygl	385.953	538.153	509.218	842.198	800.721	648.003	428.002	527.205	654.093	804.121	792.387	814.748	645.4	0.632347	1.39953e-06	0.645126
C1qtnf1	1656.89	1566.32	1643.64	1848.52	1629.05	1694.67	1156.05	1119.43	1042.31	1289.8	1329	1242.23	1434.83	0.141909	0.552502	0.906319
C1qtnf2	19.6362	29.8439	41.9746	18.1396	40.8164	21.9198	25.5919	10.5441	12.9407	22.9094	13.8257	23.2785	23.4517	-0.0013659	0.999012	1.00095
C1qtnf3	2829.64	5542.3	4513.38	3606.33	4504.2	3783.9	3778.78	2646.57	5057.46	1901.48	2380.62	2516.2	3588.4	-0.382489	0.3145	1.30359
C1qtnf4	148.964	111.674	118.192	129.569	184.874	139.739	158.846	140.588	138.818	135.166	89.8672	119.567	134.655	-0.0417184	0.911802	1.02934
C1qtnf5	125.265	174.25	129.238	171.895	184.874	193.168	99.7202	126.529	134.113	107.674	117.519	152.369	143.051	0.231157	0.400421	0.851951
C1qtnf6	2342.12	2397.14	2691.9	3025.87	2918.37	2435.83	2614.79	2616.69	2969.3	2767.46	2412.59	3098.16	2690.85	0.0925769	0.474372	0.937846
C1qtnf7	765.812	921.31	829.551	1059.01	1081.63	775.412	738.635	699.425	689.386	656.355	741.405	519.534	789.789	0.0578365	0.865047	0.960704
C1qtnf9	16.9278	21.1795	14.3597	25.05	13.2053	30.1397	16.7671	20.2095	18.8228	21.764	17.2822	14.8136	19.2101	0.167546	0.758719	0.890356
Mblac1	148.287	123.226	114.878	211.629	238.896	204.128	128.842	183.643	145.877	231.385	197.881	229.611	179.857	0.631599	4.98185e-06	0.645461
C1rb	25.7302	17.3287	29.8241	14.6845	3.60144	21.9198	32.6517	17.5735	31.7635	12.6002	23.3309	29.6272	21.7196	-0.54099	0.354734	1.45497
C1rl	55.523	64.5013	34.2424	57.0103	45.6183	53.4295	43.2415	74.6874	89.4084	56.1281	34.5643	77.2424	57.1331	-0.157505	0.746702	1.11536
C1s1	318.919	387.971	349.052	306.646	284.514	256.187	321.222	376.951	559.979	355.096	406.995	406.316	360.821	-0.194446	0.443374	1.14428
C1s2	40.6266	43.3218	30.9287	42.3258	24.0096	26.0297	36.1817	51.8418	55.292	53.8372	60.4876	51.8476	43.0608	0.016426	0.97992	0.988679
C2	49.4291	52.9489	50.8114	41.462	62.425	64.3893	52.0663	76.4447	76.4677	41.237	58.7593	57.1382	56.9649	-0.139308	0.703315	1.10138
C2cd2	1467.98	1576.91	1521.03	1473.63	1595.44	1454.93	1425.2	1516.59	1554.06	1509.73	1570.08	1659.12	1527.06	0.0330949	0.69449	0.977322
C2cd2l	1077.96	937.676	914.605	998.544	1074.43	994.61	976.905	944.575	871.732	1025.2	843.369	1058.11	976.476	0.0632368	0.613544	0.957114
C2cd3	3847.34	3709.31	3966.6	3656.43	3708.29	4311.35	4046.17	4031.36	4268.07	3851.08	3891.94	4363.67	3970.97	-0.00537309	0.9695	1.00373
C2cd4c	79.2219	73.1657	92.786	96.7448	108.043	84.9391	105.898	94.8969	109.408	92.7832	98.5083	77.2424	92.8031	0.0152103	0.967276	0.989512
C2cd4d	24.376	19.2541	24.3011	28.5052	39.6159	16.4398	38.8291	37.783	25.8814	33.2187	41.4772	42.3246	31.0005	0.247397	0.607601	0.842415
Zfyve16	1653.5	1779.08	1867.87	2716.63	2587.04	2834.5	1660.83	1487.6	1752.87	2483.38	2555.17	2605.08	2165.3	0.630304	3.11471e-25	0.64604
Snx20	53.4917	34.6574	58.5435	95.0172	92.437	54.7994	63.5385	57.9925	54.1156	93.9287	79.4979	81.4748	68.2912	0.630161	0.0052306	0.646104
C330007P06Rik	2708.44	3252.02	2795.73	2800.42	2810.33	2890.67	2697.74	2781.01	2668.13	2923.24	3255.1	2753.21	2861.34	0.0449298	0.682622	0.969337
C330018D20Rik	358.191	396.635	323.646	343.789	300.12	326.057	307.985	341.805	343.516	312.714	394.033	328.016	339.709	-0.0440106	0.80788	1.03098
C330021F23Rik	16.2506	15.4033	6.62757	12.9569	19.2077	4.10996	18.5321	7.0294	16.47	11.4547	18.1463	11.6393	13.1523	-0.0407711	0.968341	1.02866
Tmem30b	1774.03	1955.26	1783.92	2667.39	2996.4	2746.82	1448.15	1572.83	1541.12	2420.38	2330.5	2433.66	2139.2	0.629735	8.17407e-12	0.646295
C3ar1	90.0557	110.711	103.832	111.429	139.256	109.599	82.9531	81.7168	85.8791	104.238	98.5083	92.056	100.853	0.237477	0.248144	0.848228
C430049E01Rik	22.3446	33.6947	32.0333	27.6414	28.8115	26.0297	29.1218	30.7536	37.6456	24.0549	19.0104	17.988	27.4275	-0.363259	0.308189	1.28633
C4b	91.4099	67.3894	77.3217	80.3327	84.0337	75.3492	91.7779	90.5035	85.8791	74.4557	95.916	75.1262	82.4579	-0.0547232	0.852722	1.03866
C4bp	35.2097	32.732	29.8241	38.0069	40.8164	34.2496	23.8269	22.8455	36.4692	30.9277	44.9336	44.4408	34.5235	0.37683	0.218952	0.770128
C530008M17Rik	2340.09	1926.38	2058.97	2076.56	2470.59	2501.59	2312.1	2241.5	2637.55	2391.74	2399.63	2993.41	2362.51	0.133927	0.331737	0.911348
Pcdhga3	399.495	465.95	345.738	680.668	716.687	597.314	391.821	468.334	475.276	611.682	642.032	683.542	539.878	0.628083	7.66415e-11	0.647036
C5ar2	10.8338	22.1422	7.73217	17.2758	12.0048	24.6597	12.3547	10.5441	22.3521	9.16377	15.5539	14.8136	14.9526	0.128365	0.872934	0.914868
C730034F03Rik	69.0652	80.8673	79.5308	69.9672	86.4346	65.7593	90.0129	84.3528	81.1734	105.383	86.4108	82.533	81.7909	0.0372568	0.911993	0.974506
C77080	4259.02	3614	4061.6	3393.84	3517.41	4468.89	4194.42	4091.11	3550.45	3478.8	3172.14	3968.99	3814.22	-0.11258	0.385234	1.08116
C77370	257.979	239.714	260.684	314.42	292.917	257.557	212.678	167.827	169.405	260.022	249.727	271.936	246.239	0.330389	0.0525668	0.795322
Tagln	1268.9	1029.13	784.262	1739.68	1740.7	1465.88	778.347	727.543	609.389	1138.6	1050.76	890.933	1102.01	0.625851	0.00887725	0.648037
C8g	82.6075	98.1961	94.9952	69.9672	91.2365	86.3091	108.545	102.805	112.937	111.111	114.062	112.16	98.7443	-0.0321128	0.929444	1.02251
C920009B18Rik	35.2097	29.8439	49.7068	29.3689	31.2125	56.1694	38.8291	21.0882	44.7042	24.0549	34.5643	40.2084	36.2467	-0.026781	0.968257	1.01874
Hs3st5	110.369	135.742	120.401	169.303	169.268	160.288	162.376	152.011	101.173	265.749	236.766	204.216	165.638	0.624193	0.00163701	0.648782
Cab39	6957.99	7928.85	7261.61	7102.97	7015.61	6767.73	6550.64	7184.05	6326.82	6673.52	7150.49	6196.32	6926.38	-0.0451923	0.669194	1.03182
Smco3	31.1471	41.3964	53.0206	58.7379	60.024	60.2794	28.2393	35.147	42.3513	72.1647	39.749	63.4869	48.812	0.624084	0.0189722	0.648831
Cabin1	5993.1	4882.85	5749.42	5816.78	5917.17	5885.46	6069.69	5899.42	5913.89	6216.48	5273.65	6526.45	5845.36	0.0461203	0.692685	0.968537
Cables1	1115.2	1002.18	1141.05	1149.71	1014.41	869.941	1155.17	1122.95	975.257	1037.8	901.265	865.538	1029.2	-0.157067	0.17211	1.11502
Cables2	2492.44	2449.13	2396.97	2355.56	2381.75	2394.74	2444.47	2501.59	2451.67	2422.67	2366.79	2256.96	2409.56	-0.0569216	0.183408	1.04024
Cabp1	193.654	177.138	209.873	184.852	187.275	161.658	143.844	137.952	210.58	158.075	135.665	157.659	171.519	-0.120904	0.618106	1.08742
Cabyr	38.5953	40.4337	26.5103	38.8707	37.2149	32.8797	50.3013	42.1764	49.4099	36.6551	47.5259	41.2665	40.1533	-0.0689657	0.875442	1.04896
Kif26b	6414.27	5896.58	6693.85	9344.51	9857.15	7302.02	6700.67	6095.37	5919.78	12531.5	10664.8	8427.89	7987.36	0.623947	1.04346e-07	0.648893
Olfr318	55.523	60.6505	64.0665	104.519	118.848	73.9792	49.4188	44.8124	68.2327	76.7466	95.916	53.9639	72.223	0.621834	0.0148046	0.649844
Cacna1a	285.741	264.744	371.144	305.783	330.132	319.207	334.46	338.29	318.811	411.224	344.779	384.096	334.034	0.132785	0.424397	0.912069
Acss3	263.396	236.826	355.68	264.32	464.586	501.415	332.695	325.11	465.865	679.265	533.155	601.009	418.61	0.621765	0.0148643	0.649876
Gm5124	85.3159	51.0234	47.4976	95.881	84.0337	79.4592	82.0706	66.7793	47.057	111.111	101.965	116.393	80.7155	0.621459	0.00929186	0.650013
Cacna1d	825.397	804.823	999.659	846.517	846.339	730.202	890.422	815.41	912.907	754.866	745.725	905.746	839.834	-0.117719	0.302263	1.08502
Ccdc59	1445.63	1720.36	1464.69	2506.73	2301.32	2054.98	1392.55	1489.35	1448.18	2215.34	2565.54	2124.69	1894.11	0.620911	2.1967e-16	0.65026
Clip4	641.901	683.522	738.974	933.76	1088.84	1085.03	693.629	624.738	684.68	1006.87	1031.75	1100.44	859.51	0.619485	6.00971e-22	0.650903
Cacna1h	4759.41	3772.85	4333.33	5270.86	5076.83	4583.97	5951.44	5040.08	5142.16	6071	4675.69	5912.75	5049.2	0.123474	0.467777	0.917975
Cacna1i	36.564	25.9931	33.1379	12.0931	21.6087	30.1397	22.062	15.8161	25.8814	13.7457	15.5539	22.2204	22.9013	-0.492602	0.286047	1.40698
Cacna1s	59.5857	39.471	47.4976	40.5982	26.4106	36.9896	45.0064	44.8124	30.5871	29.7823	38.0208	32.8016	39.2969	-0.389502	0.20283	1.30994
Cacna2d1	2126.8	2377.88	2618.99	2270.05	2171.67	2237.19	1877.92	1571.07	1809.34	1870.56	1890.67	2210.4	2086.05	0.0310294	0.901944	0.978722
Cacna2d2	298.606	200.243	278.358	293.689	321.729	200.018	827.766	702.061	1254.07	668.955	520.193	806.284	530.998	-0.340835	0.712465	1.26649
Cacna2d3	267.459	272.446	291.613	322.195	265.306	282.217	204.735	213.518	251.755	176.403	193.56	178.821	243.336	-0.0817565	0.808007	1.05831
Cacna2d4	31.8242	29.8439	25.4057	31.9603	39.6159	30.1397	44.124	27.2389	32.9399	36.6551	19.0104	47.6152	33.0311	0.0886259	0.870964	0.940418
Paqr7	228.863	212.758	226.442	298.008	321.729	315.097	172.083	186.279	195.287	306.986	310.215	323.783	258.128	0.616254	1.70049e-10	0.652363
Cacnb2	159.798	166.548	184.467	186.579	182.473	153.438	169.436	146.739	228.227	234.822	214.299	225.378	187.684	0.190607	0.357148	0.876237
Rab32	307.408	399.523	282.776	515.684	516.207	409.626	314.163	368.165	342.34	572.736	559.078	507.895	424.633	0.615472	9.07328e-08	0.652716
Cacnb4	165.892	117.45	127.028	154.619	123.65	135.629	192.38	150.253	230.579	162.657	166.773	252.889	164.983	0.0214206	0.966884	0.985262
Cacng2	59.5857	25.0304	16.5689	25.05	60.024	20.5498	36.1817	23.7242	16.47	36.6551	25.9232	19.0461	30.4008	0.0564826	0.952788	0.961606
Zfp647	417.777	351.388	391.027	582.196	578.632	513.745	422.708	438.459	362.339	689.574	607.468	676.135	502.621	0.612433	2.33281e-10	0.654093
D430041D05Rik	176.726	85.6809	106.041	145.117	154.862	180.838	120.9	108.956	90.5848	205.039	158.996	215.855	145.8	0.612289	0.00693887	0.654158
Efcab2	147.61	172.324	167.898	214.221	211.285	254.817	158.846	154.647	174.111	294.386	273.058	237.018	205.018	0.609919	3.97059e-07	0.655233
Cacng7	3332.06	3097.99	3380.06	3305.73	3522.21	3059.18	4490.05	4102.53	4449.24	3993.11	3700.11	4020.84	3704.43	-0.0809483	0.668306	1.05771
Cacng8	57.5544	39.471	50.8114	46.6448	58.8236	35.6196	99.7202	86.1101	102.349	89.3468	75.1774	79.3586	68.4156	-0.175205	0.744877	1.12912
Cactin	2926.47	2388.47	2667.6	2744.27	2963.99	2742.71	2936.01	2844.27	2611.67	3087.05	2607.01	3269.57	2815.76	0.0880634	0.426244	0.940785
Cacul1	3514.88	3763.22	3774.4	3564.01	3416.57	3700.33	3232.52	3405.74	3322.23	3176.39	3618.02	3187.04	3472.95	-0.024141	0.838839	1.01687
Cacybp	5322.76	6579.14	4903.3	6112.2	5740.7	5116.9	4699.2	5184.18	4777.47	5011.44	5970.12	4366.84	5315.35	0.0386636	0.852384	0.973556
Snx22	257.302	165.585	165.689	318.739	309.724	245.227	255.037	215.275	218.815	355.096	329.225	393.619	269.111	0.609128	0.000302186	0.655593
Cadm1	5869.19	6278.77	5402.57	4951.26	4744.3	5236.09	4906.59	5594.52	5515.08	5302.39	5297.85	5869.36	5414	-0.0962651	0.334165	1.069
Cadm2	415.746	442.845	332.483	319.603	409.364	474.015	364.464	305.779	299.989	366.551	382.8	392.561	375.517	0.112209	0.593681	0.925171
Tnfrsf21	1238.43	1176.43	1194.07	2092.97	2187.28	1660.42	1216.06	1163.37	1081.14	1856.81	1564.04	1406.23	1486.44	0.606572	5.53319e-08	0.656755
Cpt1a	1686.68	1913.86	1894.38	2983.54	2989.2	2524.88	2073.83	2204.6	2475.2	3399.76	3401.99	3326.71	2572.89	0.60573	1.99334e-08	0.657139
Cadps	142.87	23.105	29.8241	12.0931	75.6303	16.4398	208.265	138.831	159.994	52.6917	68.2645	64.545	82.7128	-1.27919	0.066799	2.42703
Cyp26b1	6348.59	5630.87	6259.74	7765.49	9336.14	7488.34	5600.21	4379.32	3912.79	9109.94	8021.52	7125.35	6748.19	0.604081	5.6856e-06	0.65789
Rpl30	11711.3	9772.43	10460.5	18064.5	17399.8	15594.5	11210.1	11570.4	11358.4	17522.3	15760.5	15917.2	13861.8	0.60131	2.45238e-23	0.659155
Calb1	71.7737	18.2914	15.4643	14.6845	36.0144	15.0698	27.3569	12.3014	15.2935	13.7457	29.3797	15.8717	23.7706	-0.378425	0.655908	1.29992
Calca	444.861	494.831	449.57	1033.96	795.919	334.277	1336.07	843.528	1137.6	1648.33	1757.6	1249.63	960.516	0.535433	0.423153	0.689952
Calcb	69.0652	66.4267	66.2757	39.7345	45.6183	35.6196	97.0727	86.9888	149.406	73.3102	85.5467	101.579	76.387	-0.480953	0.274597	1.39566
Calcoco1	2736.88	2670.55	3241.99	2433.3	2542.62	2792.03	3697.59	3595.54	3823.38	3152.34	3020.06	3524.58	3102.57	-0.178309	0.282953	1.13156
Calcr	10.8338	11.5525	7.73217	9.50172	9.60385	8.21992	11.4722	13.1801	24.7049	16.0366	16.4181	4.23246	11.9574	-0.287878	0.709181	1.22084
Calcrl	691.33	877.988	719.091	875.022	816.327	811.032	537.43	548.293	681.151	644.901	781.154	730.099	726.151	0.200995	0.247478	0.869951
Cald1	17699.7	23006.8	19929.1	18804.8	19563	20137.4	17011.6	18641.1	18411.1	16207.3	20092.2	17781.6	18940.5	-0.0267847	0.87358	1.01874
Calhm2	383.922	364.866	450.675	475.086	505.402	386.336	370.641	398.918	384.691	462.771	394.033	485.675	421.918	0.204796	0.0805203	0.867661
Calm1	17518.9	19867.4	17569.7	18122.4	17803.1	16956.3	17459	18708.7	17509.9	17160.3	19250.6	17781.6	17975.7	-0.0206975	0.822876	1.01445
Hs3st1	201.779	186.765	204.35	374.886	346.939	302.767	215.325	210.882	244.697	305.841	273.058	308.97	264.688	0.601273	6.40615e-08	0.659172
Calm3	18068	16220.6	18097.7	16984.8	17576.2	17597.5	18527.7	18468	18509.9	16602.5	15573	17483.2	17475.7	-0.0837477	0.188081	1.05977
Sphk1	100.212	85.6809	133.656	148.572	141.657	147.958	133.254	101.926	111.76	148.911	183.191	237.018	139.483	0.600731	0.00264875	0.65942
Calml3	72.4508	76.0538	74.0079	101.928	96.0385	120.559	59.1261	45.6911	42.3513	96.2196	65.6722	60.3125	75.8675	0.539524	0.0613865	0.687998
Calml4	248.499	409.15	367.83	258.274	298.92	343.866	336.225	432.308	577.625	397.479	464.026	446.524	381.727	-0.0997723	0.791885	1.0716
Caln1	178.08	166.548	77.3217	196.945	226.891	190.428	472.126	239	372.927	715.92	737.948	624.288	349.869	0.838541	0.258588	0.559209
Calr	36127.2	38277.2	32454.1	45189.3	43223.3	36252.6	35435.1	37819	34015.2	38093.8	38962.6	37135.6	37748.8	0.157683	0.062002	0.896463
Calr3	46.7206	44.2845	43.0792	36.2793	54.0216	49.3195	41.4765	50.9631	63.527	38.946	49.2542	52.9057	47.5648	-0.0464145	0.91331	1.0327
Calu	23713.1	29398.2	25205.8	27385.7	27236.5	22966.4	21391.3	23474.7	23334.4	21356.2	25566.4	22624.6	24471.1	0.00613583	0.976545	0.995756
Camk1	1951.43	2067.89	2076.64	1983.27	2063.63	1752.21	2115.3	2220.41	2474.02	2025.19	1964.12	2022.06	2059.68	-0.12638	0.144855	1.09155
Camk1d	603.982	700.85	638.456	567.512	539.016	535.664	969.845	865.495	894.084	773.193	915.955	639.101	720.263	-0.233436	0.327177	1.17563
Gm45038	83.9617	83.7555	98.309	158.074	81.6327	169.878	81.1881	83.4741	103.525	123.711	147.762	124.858	111.677	0.599734	0.00351205	0.659876
Prickle1	1422.61	1543.22	1699.97	2268.32	2618.25	1942.64	1270.77	1495.5	1256.42	2214.2	2083.36	2027.35	1820.22	0.598492	1.4095e-09	0.660444
Camk2b	214.644	52.9489	57.4389	202.991	291.717	50.6895	112.957	50.0845	55.292	156.93	88.139	73.0099	117.237	0.663905	0.323391	0.631168
Camk2d	1753.04	2142.98	1934.15	1729.31	1955.58	2034.43	1597.29	1571.95	1711.7	1729.66	1817.22	1796.68	1814.5	0.046317	0.763927	0.968405
Camk2g	3840.57	3729.52	3753.41	3727.26	4315.73	3890.76	3889.09	3976	4102.2	4085.9	4089.82	4238.81	3969.92	0.0639974	0.339864	0.95661
Camk2n1	541.011	647.901	566.657	664.256	518.608	569.914	699.806	642.311	419.984	648.337	677.461	568.208	597.038	0.0521378	0.828404	0.964506
Camk2n2	270.167	143.443	125.924	221.995	242.497	160.288	199.44	151.132	172.935	189.003	171.093	246.541	191.205	0.20773	0.504174	0.865899
Camk4	807.793	762.463	650.606	799.872	800.721	790.482	577.141	542.142	582.331	768.612	809.669	594.661	707.208	0.217269	0.178156	0.860192
Camkk1	824.043	757.65	751.125	822.33	805.523	690.473	832.178	806.623	808.205	790.375	682.645	835.911	783.923	-0.0471396	0.696198	1.03321
Baiap3	79.899	67.3894	94.9952	133.024	103.241	108.229	147.374	95.7756	127.054	219.931	178.006	181.996	128.076	0.598121	0.049523	0.660614
Camkmt	188.914	191.579	180.049	184.852	163.265	153.438	154.434	181.007	176.464	147.766	148.627	154.485	168.74	-0.168938	0.250931	1.12423
Camkv	1029.21	706.626	801.936	905.255	767.107	487.715	841.003	638.797	543.509	654.064	590.186	570.324	711.311	-0.198734	0.457259	1.14769
Caml	1598.66	1777.16	1620.44	1693.03	1606.24	1748.1	1546.99	1515.71	1542.29	1587.62	1737.72	1567.07	1628.42	0.0502674	0.56783	0.965757
Camsap1	4687.63	4515.09	4598.43	4534.91	4789.92	4638.77	4211.19	4473.33	4283.37	4513.16	4461.39	4431.39	4511.55	0.0311602	0.629784	0.978633
Camsap2	4873.16	4637.36	5361.7	5357.24	4442.98	4960.72	4865.11	4510.24	4856.29	4625.41	4558.17	5430.25	4873.22	0.013691	0.926626	0.990555
Camsap3	1566.83	1356.45	1386.27	1335.42	1355.34	1646.72	1680.24	1436.63	1299.95	1575.02	1458.61	1463.37	1463.41	0.0155672	0.931441	0.989268
Camta1	2165.4	2263.32	1982.75	2162.94	2040.82	2472.82	2268.85	1991.08	2126.98	2051.54	2269.15	2011.48	2150.59	0.0228144	0.86307	0.984311
Camta2	2078.05	1948.52	2082.16	2109.38	2364.95	1970.04	2301.51	2418.99	2550.49	2407.78	2131.75	2481.28	2237.08	0.00956716	0.961895	0.99339
Cand1	11470.2	12390	11682.2	12062	11749.1	12298.4	10315.3	11157.4	10576.1	11244	12111.3	11572.6	11552.4	0.0717166	0.320925	0.951505
Cand2	5531.99	4619.07	5293.22	4998.77	5176.47	5341.58	5812.89	5800.13	5520.97	5633.43	4860.61	6804.74	5449.49	0.0102909	0.960952	0.992892
Cant1	3596.81	3373.32	3635.22	3755.77	3872.75	3908.57	3774.36	3845.08	3882.21	3801.82	3341.51	4259.97	3753.95	0.0530691	0.599499	0.963884
Canx	18932	23311.9	17734.3	21266.6	20774.3	19556.5	17025.7	19333.5	17344	17421.5	21198.3	18740.3	19386.6	0.065468	0.644859	0.955635
Cap1	8980.51	9062.92	9224.47	9100.92	8763.51	9019.99	8760.37	9178.64	8736.14	8777.75	9029.93	8555.92	8932.59	-0.0185908	0.707532	1.01297
Cap2	62.9713	66.4267	72.9033	91.562	128.451	83.5691	146.492	164.312	151.759	318.441	301.574	210.565	149.919	0.772607	0.122065	0.585359
Prrt1	215.321	160.772	139.179	328.241	333.734	193.168	219.737	185.4	221.168	361.969	287.748	222.204	239.053	0.597404	0.00428394	0.660942
Capn1	1214.06	1113.85	1292.38	1118.61	1187.28	1234.36	1401.38	1332.07	1379.95	1313.86	1153.58	1170.28	1242.64	-0.108078	0.266833	1.07779
Capn10	1734.76	1349.71	1570.73	1601.47	1623.05	1517.94	1854.97	1750.32	1832.87	1659.79	1475.9	1675	1637.21	-0.0796415	0.533351	1.05676
Capn12	67.711	54.8743	57.4389	76.0137	76.8308	58.9094	86.483	72.0513	109.408	81.3285	63.944	77.2424	73.5196	-0.0383761	0.931441	1.02696
Nmnat2	433.351	370.642	298.241	682.396	589.436	369.896	337.99	372.558	378.809	617.409	629.071	421.13	458.411	0.595301	0.000779346	0.661906
Capn2	6564.58	6701.4	6823.08	6873.2	7120.05	7089.68	6564.76	6690.23	6552.69	6822.43	6686.47	7267.13	6812.98	0.0689188	0.066799	0.953352
Capn3	16.2506	20.2168	20.9873	12.0931	10.8043	23.2898	16.7671	21.0882	21.1757	30.9277	25.0591	22.2204	20.0734	0.0978191	0.883816	0.934444
Slco2b1	111.723	115.525	113.773	152.027	202.881	179.468	133.254	122.136	121.172	185.566	187.511	177.763	150.233	0.593806	5.15986e-07	0.662592
Capn6	21687.8	23719.2	19672.8	24434.1	23954.4	19488	22253.5	21915.9	22960.3	20675.8	21712.4	22514.6	22082.4	0.00628844	0.968582	0.995651
Capn7	3294.14	3650.58	3447.44	3389.52	3164.47	3579.77	3275.76	3188.71	3228.11	3453.6	3640.49	3268.52	3381.76	0.0295424	0.746726	0.979731
Capn8	15.5735	9.62706	20.9873	7.77413	10.8043	19.1798	17.6496	14.9375	17.6464	25.2004	12.9616	16.9298	15.7726	-0.06756	0.934185	1.04794
Capns1	5999.87	5371.9	6223.29	7124.56	6701.08	6153.98	6722.73	6679.69	6764.45	7153.47	5925.19	6984.62	6483.74	0.0847486	0.448821	0.942949
Capns2	23.6989	24.0677	43.0792	33.6879	21.6087	23.2898	39.7116	21.9669	16.47	19.473	14.6898	23.2785	25.4185	-0.308874	0.554265	1.23874
Caprin1	27869.9	32346.9	27483.4	30480.6	30111.7	30043.8	25361.6	28305.6	26090.8	28632.2	31841.5	27133.2	28808.4	0.0900547	0.328948	0.939487
Zdhhc20	5301.1	5612.58	5450.07	8001.31	7416.57	7800.7	5263.11	4685.09	5117.45	7772.03	8796.62	7627.95	6570.38	0.593576	7.82031e-26	0.662698
Caps2	10.8338	8.66436	3.31379	10.3655	12.0048	17.8098	15.8846	14.9375	12.9407	12.6002	17.2822	11.6393	12.3564	0.278495	0.684043	0.82445
Capsl	35.2097	34.6574	29.8241	12.0931	28.8115	42.4696	25.5919	36.0257	27.0578	30.9277	15.5539	16.9298	27.9294	-0.394095	0.419088	1.31412
Itgb3	561.324	621.908	888.094	1138.48	991.597	717.873	390.938	366.407	421.16	737.684	657.586	652.857	678.826	0.592061	0.0283604	0.663394
Capza2	6169.83	7666.99	6490.6	6774.72	6290.52	6415.64	5912.61	6456.5	6219.76	5934.69	7109.02	5774.13	6434.59	-0.0228042	0.883453	1.01593
Capzb	8135.48	8188.78	7893.44	9183.84	8188.48	8770.65	7624.62	7758.7	7600.89	8052.67	8209.03	8259.64	8155.52	0.102059	0.0580909	0.931703
Car10	18.282	9.62706	12.1505	20.731	25.2101	13.6999	25.5919	14.9375	22.3521	29.7823	40.6131	23.2785	21.3547	0.584457	0.225819	0.6669
Car11	353.452	249.341	269.521	265.184	282.113	204.128	587.731	441.973	478.805	528.062	448.472	458.164	380.579	-0.122345	0.808623	1.0885
Fas	50.7833	63.5386	78.4262	95.0172	93.6375	72.6093	57.3612	84.3528	63.527	116.838	100.237	117.451	82.8149	0.591983	0.00487467	0.663431
Eps8	752.947	722.992	724.614	905.255	1046.82	905.561	689.216	616.83	622.329	1406.64	1165.68	793.586	862.706	0.591552	3.61217e-05	0.663628
Car14	50.7833	47.1726	34.2424	63.9206	66.0264	53.4295	58.2436	41.2977	50.5863	73.3102	57.8952	47.6152	53.7103	0.354162	0.163904	0.782324
Car15	121.88	102.047	114.878	121.795	129.652	106.859	141.197	133.559	129.407	162.657	125.296	118.509	125.644	0.0411614	0.885322	0.971872
Car2	804.407	714.328	825.132	564.056	675.871	563.064	559.492	649.341	634.094	388.315	496.862	625.346	625.026	-0.338155	0.0520742	1.26414
Car3	58.2315	119.376	62.9619	164.984	169.268	27.3997	61.7736	464.819	290.577	255.44	199.609	581.963	204.7	0.40369	0.759657	0.755922
Car5a	14.8964	10.5898	8.83676	8.63792	10.8043	10.9599	6.17736	8.78675	17.6464	11.4547	14.6898	11.6393	11.26	0.0328946	0.971387	0.977457
Car5b	117.817	145.369	129.238	138.207	114.046	119.189	181.791	152.011	145.877	127.147	157.268	115.335	136.941	-0.169624	0.433296	1.12476
Car7	30.47	26.9558	26.5103	21.5948	25.2101	20.5498	32.6517	23.7242	22.3521	33.2187	28.5156	29.6272	26.7817	-0.0424463	0.937876	1.02986
Car8	84.6388	120.338	162.375	68.2396	74.4298	78.0892	39.7116	50.0845	42.3513	30.9277	38.8849	50.7895	70.0717	-0.55063	0.322091	1.46473
Car9	96.1497	123.226	142.493	109.702	117.647	98.639	108.545	95.7756	116.466	119.129	104.557	139.671	114.333	0.022417	0.945798	0.984582
Gls2	190.945	173.287	208.768	296.281	325.33	283.587	166.789	184.522	242.344	300.114	274.786	270.877	243.136	0.591025	1.83302e-07	0.663871
Card11	6.09399	7.70165	16.5689	11.2293	12.0048	8.21992	9.70727	10.5441	15.2935	11.4547	9.50519	10.5811	10.742	-0.0285996	0.975257	1.02002
Card14	96.8268	53.9116	71.7987	75.1499	80.4322	105.489	75.0107	86.9888	85.8791	103.092	95.0519	65.6031	82.9362	0.148857	0.636964	0.901965
Card19	394.078	351.388	415.328	453.491	490.997	452.095	540.96	514.025	555.273	494.844	396.626	562.917	468.502	0.0413243	0.881752	0.971762
Card6	171.309	178.101	243.011	189.171	168.067	217.828	253.272	274.147	278.813	230.24	251.455	247.599	225.251	-0.0966066	0.737189	1.06926
Card9	39.9495	30.8066	37.5562	71.6948	45.6183	41.0996	52.9488	35.147	47.057	38.946	63.0799	64.545	47.3707	0.43119	0.165639	0.74165
Carf	778	851.995	934.487	703.991	714.286	848.021	883.362	811.017	947.023	766.321	861.516	869.77	830.816	-0.126245	0.26817	1.09145
Dctn3	763.103	688.335	658.339	1109.11	1094.84	1106.95	738.635	735.451	705.856	1120.27	971.257	1077.16	897.442	0.590897	1.25234e-23	0.66393
Carm1	10019.9	8779.88	9524.92	10203.1	10794.7	10491.4	9956.13	10121.5	9666.69	10738.8	9108.56	10638.3	10003.7	0.0935546	0.203723	0.937211
Tacr1	29.1157	40.4337	46.393	54.4189	68.4274	56.1694	54.7137	32.511	37.6456	72.1647	52.7106	57.1382	50.1535	0.587836	0.0185711	0.66534
Ctsf	420.485	517.936	459.512	727.313	783.914	779.522	635.385	652.855	772.912	917.523	905.585	1068.7	720.137	0.584772	0.000751252	0.666755
[truncated: 14,499 more rows]

## Sheet: DE genes 
	Low-FVB-youngest	Low-FVB-middle	Low-FVB-oldest	Low-DUHi youngest	Low-DUHi-middle	Low-DUHi-oldest	Up-FVB-youngest	Up-FVB-middle	Up-FVB-oldest	Up-DUHi-youngest	Up-DUHi-middle	Up-DUHi-oldest	baseMean	log2FC	padj	FC
Rps3a2	50.7833	71.2403	47.4976	19490.6	18091.2	16874.1	179.143	64.1433	35.2928	17760.5	19303.3	14845.4	8901.11	7.88793	2.70603e-113	236.867
Rps24-ps3	11.5109	22.1422	38.6608	4851.92	4451.38	4259.29	41.4765	15.8161	4.7057	4042.37	4976.4	3769.01	2207.06	7.61789	4.09115e-82	196.432
Gm13693	12.188	23.105	18.7781	2917.03	2882.35	2619.41	20.297	13.1801	19.9992	2940.43	3268.92	2912.99	1470.72	7.38606	0	167.273
Gm13694	12.188	23.105	18.7781	2917.03	2882.35	2619.41	20.297	13.1801	19.9992	2940.43	3268.92	2912.99	1470.72	7.38606	0	167.273
Gm13696	12.188	23.105	18.7781	2917.03	2882.35	2619.41	20.297	13.1801	19.9992	2940.43	3268.92	2912.99	1470.72	7.38606	0	167.273
Gm13697	12.188	23.105	18.7781	2917.03	2882.35	2619.41	20.297	13.1801	19.9992	2940.43	3268.92	2912.99	1470.72	7.38606	0	167.273
Gm13698	12.188	23.105	18.7781	2917.03	2882.35	2619.41	20.297	13.1801	19.9992	2940.43	3268.92	2912.99	1470.72	7.38606	0	167.273
Vcp-rs	65.6797	119.376	70.6941	16121	15308.5	15193.1	136.784	72.93	132.936	15182.1	15766.5	14680.3	7737.49	7.27623	0	155.012
Rps2-ps13	19.6362	25.0304	38.6608	20463.2	81.6327	17.8098	87.3655	22.8455	91.7612	20851	50.1183	12.6974	3480.15	7.18421	7.97146e-06	145.433
Tpm3-rs7	77.8677	88.569	141.388	12062.9	11044.4	11709.3	98.8377	93.1395	89.4084	10932.4	11454.6	10960	5729.39	6.87078	0	117.034
Gm8822	16.9278	29.8439	18.7781	1861.47	1587.04	1649.46	13.2372	13.1801	16.47	1339.06	1838.82	1151.23	794.626	6.45156	6.76559e-241	87.521
Gjb4	10.1567	3.85083	8.83676	1019.28	997.6	920.631	21.1795	13.1801	12.9407	1136.31	1055.94	949.129	512.419	6.42888	1.70415e-261	86.1559
Masp2	15.5735	6.73894	20.9873	627.113	552.221	439.765	17.6496	16.6948	24.7049	702.174	644.625	622.172	307.535	5.15714	5.06236e-151	35.6823
Tmem181b-ps	69.0652	61.6132	54.1252	2180.21	2220.89	1872.77	77.6582	53.5992	67.0563	2230.23	2071.27	2028.41	1082.24	5.03272	0	32.734
Gm10600	17.6049	3.85083	32.0333	613.293	518.608	530.185	21.1795	18.4522	22.3521	546.39	485.629	743.855	296.119	4.91435	2.33886e-103	30.1555
Gm14305	3.38555	34.6574	56.3343	634.887	517.407	741.162	3.52992	29.8749	2.35285	533.79	843.369	579.847	331.717	4.89205	3.53777e-11	29.693
Cwc22	2292.02	2843.83	2409.12	71344.1	70533.1	63581	2438.29	2519.16	2369.32	69580.5	79452.1	68778.5	36511.8	4.83111	0	28.4648
Gm3883	2.03133	6.73894	16.5689	274.686	134.454	152.068	17.6496	13.1801	10.5878	147.766	222.94	261.354	105.002	4.18814	1.66084e-31	18.2286
Il11ra2	16.9278	35.6201	15.4643	364.52	343.338	409.626	56.4787	24.6029	0	395.188	328.361	490.965	206.758	3.96176	8.69781e-11	15.5815
Il1f9	125.265	160.772	144.702	2293.37	2306.12	2086.49	140.314	144.103	125.878	2034.36	2241.5	2094.01	1158.07	3.95995	0	15.5619
Dynlt1b	289.803	2.88812	201.036	4255.04	4052.82	3979.81	393.586	321.595	459.983	4655.2	4127.84	4168.97	2242.38	3.91879	9.21751e-08	15.1242
Gm7340	50.1062	7.70165	62.9619	558.874	600.24	590.464	59.1261	12.3014	64.7034	589.918	703.384	684.6	332.032	3.86192	1.23618e-16	14.5397
Zfp990	92.087	42.3591	43.0792	889.706	859.544	801.442	73.2458	68.5366	64.7034	880.868	1055.94	753.378	468.741	3.75468	1.55078e-118	13.498
Gm14295	9.47954	7.70165	57.4389	240.134	249.7	357.566	9.70727	5.27205	29.4106	208.476	241.95	244.425	138.438	3.72114	1.22795e-15	13.1879
Col6a4	15.5735	16.366	19.8827	39.7345	52.8212	53.4295	7.94231	14.9375	12.9407	357.387	235.037	97.3466	76.9499	3.2558	3.39642e-09	9.552
Rps26-ps1	1581.05	792.307	1155.41	13444.9	12061.2	12956	2001.46	1609.73	1261.13	12077.9	12800.9	12189.5	6994.29	3.16781	2.70338e-85	8.98683
Cort	18.9591	17.3287	17.6735	138.207	181.273	187.688	19.4145	17.5735	11.7643	146.62	125.296	136.497	84.8578	3.13189	2.24688e-53	8.76585
Trim12a	41.3037	27.9185	40.87	245.317	225.69	245.227	31.7693	27.2389	31.7635	296.677	299.845	350.236	155.321	3.04581	3.03809e-70	8.25809
Gm13305	223.446	221.422	241.906	1826.06	2045.62	1490.54	249.742	213.518	229.403	2064.14	1923.5	1885.56	1051.24	3.02764	2.63662e-258	8.15473
Dennd1c	33.1784	28.8812	47.4976	247.908	260.504	365.786	31.7693	35.147	49.4099	327.605	311.943	294.156	169.482	3.01827	1.05998e-75	8.10193
Gm10031	90.0557	77.0165	82.8446	824.058	647.059	891.861	84.718	79.9594	149.406	663.228	660.179	700.472	412.571	2.96809	1.53588e-80	7.825
4930562C15Rik	114.432	105.898	136.97	968.311	971.189	839.801	132.372	107.198	139.995	1043.52	801.892	1044.36	533.829	2.95058	4.72451e-171	7.73057
Zfp973	26.4073	30.8066	17.6735	199.536	162.065	295.917	25.5919	33.3896	42.3513	200.458	205.658	281.459	126.776	2.93711	7.63509e-42	7.65874
Lct	10.8338	10.5898	14.3597	73.4224	82.8332	80.8292	12.3547	14.0588	8.23498	88.2013	107.149	95.2303	49.8415	2.90445	6.15171e-35	7.48732
Zfp985	20.9904	28.8812	19.8827	150.3	142.857	147.958	19.4145	18.4522	19.9992	166.093	224.668	118.509	89.8339	2.90059	3.01721e-41	7.46729
Fam205a4	31.1471	9.62706	20.9873	133.888	151.261	119.189	25.5919	16.6948	34.1164	155.784	201.337	205.274	92.0748	2.80737	8.2337e-27	7.00007
Gm14654	94.1183	90.4944	91.6814	682.396	637.455	691.843	88.2479	81.7168	116.466	639.173	540.932	693.065	370.632	2.79354	2.2487e-158	6.93327
Ahcy	916.807	792.307	836.178	6141.56	5795.92	5874.5	961.902	869.009	835.262	5759.43	5417.96	5514.89	3309.64	2.72466	0	6.61004
Gm5859	18.9591	9.62706	8.83676	68.2396	115.246	101.379	15.8846	8.78675	29.4106	64.1464	76.9056	172.473	57.4912	2.71414	2.57195e-13	6.56202
Zfp534	23.0217	14.4406	11.046	111.429	93.6375	104.119	21.1795	9.66542	11.7643	79.0375	123.567	98.4047	58.4427	2.71147	4.17493e-28	6.54986
4930447C04Rik	70.4195	92.4198	87.263	529.505	510.204	523.335	72.3633	85.2315	97.6434	522.335	544.388	559.743	307.904	2.67583	2.07621e-180	6.39007
Smarce1-ps1	43.3351	52.9489	28.7195	170.167	184.874	131.519	38.8291	0	0	151.202	187.511	219.03	100.678	2.66994	0.0170097	6.36402
Zfp979	58.2315	107.823	81.74	464.72	420.168	452.095	65.3035	70.294	70.5856	489.116	541.796	493.082	276.246	2.66623	6.89597e-86	6.3477
Rtn4rl2	17.6049	10.5898	12.1505	101.928	91.2365	58.9094	30.0043	25.4816	28.2342	221.076	111.47	175.647	73.6943	2.61673	2.47267e-12	6.13358
Gm10073	18.282	24.0677	29.8241	117.476	204.082	130.149	24.7094	7.0294	19.9992	105.383	66.5363	96.2885	70.3188	2.54447	6.42593e-14	5.83393
Gm4724	100.212	146.331	71.7987	693.625	672.269	556.214	50.3013	138.831	142.348	620.846	713.753	486.733	366.105	2.52852	6.27988e-29	5.76978
Tlr1	35.8868	51.9861	37.5562	176.214	205.282	158.918	39.7116	33.3896	42.3513	264.604	279.107	272.994	133.167	2.50135	3.10364e-37	5.66217
Sim2	101.567	58.7251	58.5435	33.6879	196.879	210.978	144.727	104.562	115.29	1258.87	1204.57	265.587	312.832	2.44203	0.00384242	5.43407
Gm5421	42.6579	37.5455	19.8827	114.884	111.645	112.339	10.5898	16.6948	7.05856	135.166	125.296	137.555	72.6095	2.43294	7.3773e-12	5.39991
Gm2420	80.5761	68.3522	61.8573	393.026	386.555	410.996	93.5428	84.3528	109.408	460.48	444.152	464.512	254.817	2.36465	9.31977e-82	5.15029
Mrap2	12.188	18.2914	12.1505	74.2862	56.4226	65.7593	16.7671	17.5735	21.1757	107.674	86.4108	69.8356	46.5446	2.24673	8.81004e-19	4.74607
Lrrc55	187.56	206.982	237.488	919.939	854.742	764.452	167.671	233.728	263.519	1312.71	1321.22	913.153	615.264	2.23451	7.76825e-44	4.70603
Gm14410	73.1279	52.9489	46.393	249.636	285.714	324.687	170.319	70.294	72.9384	378.006	558.214	464.512	228.899	2.21525	1.06586e-12	4.64362
Cd8a	7.44821	10.5898	12.1505	43.1896	39.6159	61.6494	15.8846	7.0294	7.05856	49.2553	44.9336	40.2084	28.2511	2.21209	1.88799e-13	4.63345
Gm14296	300.637	367.754	349.052	1694.76	1388.96	1490.54	343.284	398.04	419.984	1785.79	1826.72	1551.2	993.06	2.16454	1.10418e-112	4.48324
Hmga1	3776.92	2719.65	3234.25	14582.5	13584.6	13905.4	3437.26	2873.27	2602.25	15071	12484.6	11928.1	8349.99	2.12854	5.56385e-110	4.37273
Aldh1a1	9.47954	12.5152	11.046	6.04655	7.20289	5.47994	33.5342	20.2095	3.52928	159.221	146.034	60.3125	39.5509	2.08687	0.0349753	4.24827
Fam205a2	31.1471	42.3591	60.7527	195.217	174.07	138.369	42.359	49.2058	58.8213	207.33	201.337	277.226	123.183	2.08614	1.4809e-23	4.2461
Gm14434	80.5761	108.786	45.2884	557.146	608.644	372.636	192.38	79.9594	147.053	391.751	718.938	80.4167	281.965	2.06166	0.000196924	4.17468
Zfp965	25.7302	34.6574	16.5689	121.795	99.6399	124.669	37.0641	26.3602	29.4106	109.965	126.16	128.032	73.3377	2.06148	6.06561e-29	4.17416
Slfn10-ps	11.5109	13.4779	12.1505	63.9206	56.4226	58.9094	16.7671	15.8161	22.3521	69.8738	57.8952	60.3125	38.2841	2.01949	3.27893e-18	4.05441
Gm13212	81.2532	97.2333	89.4722	291.962	286.915	363.046	63.5385	71.1727	43.5278	266.895	324.905	244.425	185.362	1.98882	1.03977e-30	3.96913
Olfr648	88.7014	105.898	103.832	421.531	334.934	360.306	89.1304	89.6248	112.937	384.878	397.49	352.352	236.801	1.94584	1.79366e-76	3.85262
Nrsn1	32.5013	11.5525	12.1505	86.3792	114.046	43.8395	18.5321	11.4228	5.88213	60.71	38.8849	15.8717	37.6477	1.94432	0.000391737	3.84858
Gm45015	124.588	77.9792	133.656	495.817	510.204	534.295	147.374	131.801	152.935	473.08	459.705	444.408	307.154	1.92668	1.81089e-48	3.80178
Olfr1388	777.323	335.985	702.522	2289.05	1685.48	2709.83	606.263	310.172	512.922	2192.43	1481.95	1950.11	1296.17	1.92266	1.19014e-17	3.79121
2200002D01Rik	37.2411	23.105	28.7195	102.791	64.826	91.7891	43.2415	30.7536	19.9992	159.221	146.898	131.206	73.3159	1.91828	4.93054e-12	3.77973
Lipo3	151.673	191.579	123.715	532.96	492.197	502.785	134.137	128.287	152.935	555.554	606.604	581.963	346.199	1.89197	3.47748e-65	3.71142
Gm11281	15.5735	25.0304	22.0919	57.0103	63.6255	45.2095	16.7671	12.3014	16.47	85.9104	69.9928	73.0099	41.9161	1.88186	2.60735e-13	3.68549
Gm2026	90.0557	63.5386	149.12	240.998	228.091	398.666	78.5407	55.3565	78.8205	366.551	273.058	387.27	200.839	1.88047	1.94426e-14	3.68194
Otor	68.3881	119.376	87.263	358.474	310.925	341.126	60.0086	103.684	127.054	248.567	346.507	449.699	218.423	1.86909	3.06347e-20	3.65301
Atp12a	34.5326	20.2168	19.8827	15.5483	85.2341	94.529	40.5941	30.7536	38.8221	205.039	197.881	67.7194	70.8961	1.84794	0.000523187	3.59986
Hsd17b1	6.7711	13.4779	13.2551	37.1431	40.8164	23.2898	15.0021	9.66542	8.23498	50.4008	44.0695	38.0921	25.0182	1.83479	1.682e-08	3.5672
Arntl2	186.882	229.124	208.768	812.829	753.902	715.133	210.913	200.338	254.108	757.157	801.028	703.646	486.152	1.82633	5.81703e-110	3.54634
Gm14292	212.613	224.311	187.781	642.662	719.088	697.323	228.562	190.672	187.052	793.812	718.938	732.216	461.252	1.80035	3.84976e-108	3.48304
Sox21	57.5544	26.9558	24.3011	44.0534	63.6255	87.6791	123.547	102.805	56.4684	561.281	464.026	140.729	146.086	1.79676	0.0425361	3.47438
Abcb9	85.3159	86.6436	99.4136	288.507	337.335	261.667	109.427	87.8675	96.4669	360.824	323.176	372.456	209.092	1.78681	6.38971e-48	3.45051
Qrfp	18.9591	23.105	33.1379	94.1534	105.642	95.899	29.1218	25.4816	39.9985	105.383	79.4979	79.3586	60.8115	1.7452	6.30625e-17	3.35241
Gm11839	27.0844	3.85083	20.9873	76.8775	96.0385	72.6093	20.297	31.6323	39.9985	73.3102	82.0903	78.3005	51.923	1.74012	1.34747e-06	3.34064
Spaca1	10.1567	14.4406	12.1505	38.0069	51.6207	28.7697	15.8846	13.1801	10.5878	42.3825	40.6131	49.7314	27.2937	1.72049	1.07603e-09	3.29549
Gm28455	14.2193	15.4033	18.7781	28.5052	48.0192	38.3596	7.94231	9.66542	12.9407	46.9643	55.3029	40.2084	28.0257	1.71529	2.88725e-08	3.28362
Ica1l	122.557	62.5759	36.4516	298.872	291.717	293.177	109.427	65.9006	123.525	302.405	276.515	250.773	186.158	1.71515	1.39338e-11	3.28332
Vsig2	37.2411	34.6574	34.2424	128.705	115.246	102.749	30.8868	37.783	39.9985	105.383	105.421	144.962	76.4396	1.71395	1.53512e-24	3.28059
Zfp966	209.904	214.684	275.044	694.489	480.192	1045.3	205.618	197.702	255.284	727.375	609.196	882.468	483.105	1.70994	1.01984e-22	3.27147
Aph1b	263.396	270.52	257.371	752.363	824.73	809.662	239.152	231.091	229.403	759.448	915.955	792.528	528.802	1.70174	1.3854e-109	3.25294
Gm12424	14.2193	19.2541	12.1505	34.5517	39.6159	35.6196	6.17736	9.66542	5.88213	30.9277	37.1566	43.3827	24.0503	1.70016	2.43951e-07	3.24936
Gm11400	62.2941	42.3591	57.4389	186.579	206.483	209.608	86.483	54.4778	69.4091	213.058	165.045	225.378	131.551	1.69159	1.57329e-24	3.23013
Tcp11l1	815.241	777.867	769.903	2287.32	2388.96	2439.94	871.89	666.036	787.029	2660.93	2561.22	2387.11	1617.79	1.65068	1.30868e-138	3.13981
2210418O10Rik	241.728	281.11	271.73	895.753	779.112	819.252	269.156	313.687	349.399	1004.58	991.132	878.235	591.239	1.64194	2.13785e-59	3.12084
Grm7	48.7519	50.0607	47.4976	95.881	116.447	108.229	25.5919	9.66542	15.2935	116.838	89.0031	88.8817	67.6784	1.63767	1.25878e-05	3.11163
Sfi1	2574.37	2485.71	2679.75	7661.84	8433.38	7691.1	2672.15	2776.61	3017.53	8780.04	8972.03	8787.64	5544.35	1.63547	9.85453e-162	3.10688
Rxfp1	45.3664	13.4779	22.0919	83.7879	69.6279	102.749	31.7693	27.2389	4.7057	73.3102	72.5851	50.7895	49.7916	1.62212	0.000107629	3.07827
Gfra3	61.617	58.7251	93.8906	248.772	236.495	135.629	28.2393	57.9925	72.9384	156.93	166.773	187.286	125.441	1.6086	7.08004e-10	3.04957
Gm2115	569.45	642.125	510.323	1976.36	2022.81	1442.6	655.682	692.396	571.743	2027.48	1964.12	1630.56	1225.47	1.60293	7.99745e-53	3.03761
Gm20379	824.72	1069.57	814.087	2509.32	2258.1	2789.29	746.578	847.043	745.854	2367.69	2881.8	2376.53	1685.88	1.5885	3.20554e-60	3.00737
Gm2237	229.54	135.742	97.2044	475.086	392.557	468.535	182.673	68.5366	182.346	470.789	515.873	371.398	299.19	1.58586	2.39546e-10	3.00186
Myh13	25.0531	19.2541	12.1505	84.6517	66.0264	21.9198	10.5898	11.4228	7.05856	24.0549	29.3797	32.8016	28.6969	1.58477	0.00192003	2.9996
5930422O12Rik	11.5109	13.4779	9.94136	35.4155	36.0144	27.3997	10.5898	6.15072	11.7643	25.2004	31.1079	33.8597	21.036	1.58311	3.52163e-07	2.99616
Alx1	20.9904	58.7251	59.6481	138.207	140.456	54.7994	58.2436	84.3528	61.1741	221.076	228.125	226.437	112.686	1.56234	6.36751e-05	2.95332
Rhox8	14.8964	29.8439	9.94136	37.1431	31.2125	20.5498	64.421	13.1801	8.23498	100.802	150.355	65.6031	45.5152	1.52805	0.0316527	2.88396
Dpt	16.2506	19.2541	64.0665	63.9206	97.239	47.9495	3.52992	11.4228	2.35285	30.9277	57.0311	38.0921	37.6697	1.52688	0.0435342	2.88163
Gm3512	128.651	138.63	78.4262	361.929	358.944	289.067	111.192	94.0182	170.582	360.824	418.228	282.517	232.751	1.52505	3.66741e-17	2.87797
Kcna4	60.2628	149.219	139.179	336.015	369.748	374.006	115.605	157.283	181.17	324.168	416.5	475.094	258.188	1.52278	7.41644e-12	2.87344
Fcgr2b	43.3351	54.8743	58.5435	220.267	219.688	73.9792	36.1817	33.3896	45.8806	92.7832	109.742	53.9639	86.8857	1.50588	0.000103408	2.83998
Gm20878	138.13	167.511	175.631	428.441	487.395	371.266	163.259	147.617	230.579	489.116	516.737	574.556	324.187	1.49588	7.18486e-26	2.82036
Fam171b	1460.53	1703.99	1725.38	5385.75	5134.46	4583.97	2002.35	1693.21	2218.74	4926.67	5194.15	5196.4	3435.47	1.49479	2.37977e-61	2.81823
Gm4540	95.4726	20.2168	28.7195	155.483	108.043	90.4191	53.8312	28.9963	30.5871	126.002	152.083	98.4047	82.3548	1.48984	0.000115557	2.80857
Sertm1	72.4508	55.837	38.6608	182.26	206.483	87.6791	130.607	119.5	111.76	473.08	381.072	152.369	167.646	1.48806	0.000868743	2.80511
Tmem132b	289.803	361.015	192.2	784.324	839.136	595.944	264.744	111.592	249.402	589.918	845.962	445.466	464.125	1.48123	5.45331e-09	2.79186
Hist1h3h	43.3351	18.2914	51.916	109.702	78.0313	75.3492	40.5941	33.3896	10.5878	93.9287	93.3237	101.579	62.5023	1.47115	6.8934e-06	2.77243
AK157302	272.875	279.185	297.136	734.224	743.098	724.723	207.383	234.606	287.048	628.864	775.969	727.983	492.758	1.46181	2.4152e-53	2.75454
Gm9392	33.8555	36.5828	20.9873	87.243	74.4298	83.5691	30.8868	24.6029	37.6456	74.4557	106.285	79.3586	57.4919	1.45716	6.83254e-13	2.74567
Dlk2	233.603	116.487	129.238	412.893	511.405	331.537	193.263	165.191	104.702	537.226	322.312	480.384	294.853	1.45486	3.36155e-11	2.7413
Wfdc2	119.171	83.7555	130.342	279.005	289.316	356.196	150.904	147.617	147.053	438.716	362.925	399.967	242.081	1.44947	4.59277e-18	2.73108
Cda	18.9591	15.4033	20.9873	50.9638	52.8212	35.6196	28.2393	16.6948	16.47	63.0009	50.9824	64.545	36.2239	1.44502	2.58563e-08	2.72266
Specc1	1925.02	1793.52	1747.47	5389.2	5171.67	4674.39	2024.41	2020.95	1929.34	5486.81	5690.15	4648.3	3541.77	1.44087	9.21548e-109	2.71484
Olfr76	7.44821	11.5525	13.2551	34.5517	30.012	19.1798	12.3547	7.0294	11.7643	18.3275	33.7002	31.7434	19.2432	1.43882	7.04752e-05	2.71098
Spr-ps1	282.355	240.677	268.417	779.141	779.112	749.382	314.163	254.816	359.986	721.647	750.91	767.133	522.312	1.40582	3.8866e-54	2.64968
Nrsn2	28.4386	9.62706	20.9873	45.781	51.6207	36.9896	34.4167	20.2095	32.9399	90.4923	86.4108	76.1843	44.5081	1.40451	0.000153787	2.64728
Morn1	160.475	144.406	138.074	443.989	470.589	382.226	164.141	146.739	221.168	407.788	425.141	439.118	295.321	1.40341	1.54945e-34	2.64527
Ttbk1	42.6579	8.66436	12.1505	56.1465	54.0216	61.6494	21.1795	14.0588	23.5285	53.8372	31.972	68.7775	37.387	1.39408	0.000839734	2.62821
Sox14	16.2506	14.4406	9.94136	56.1465	32.413	19.1798	12.3547	7.90807	8.23498	36.6551	25.9232	10.5811	20.8358	1.38176	0.00484746	2.60587
Mogat2	16.2506	6.73894	27.6149	59.6017	49.2197	52.0595	23.8269	20.2095	18.8228	41.237	31.972	60.3125	33.9888	1.38129	3.6668e-05	2.60502
Bmp8a	71.7737	85.6809	74.0079	244.453	181.273	104.119	67.9509	73.8087	25.8814	206.185	181.463	120.625	119.768	1.37686	3.11836e-06	2.59702
Kpna2-ps	70.4195	47.1726	11.046	177.077	138.055	234.268	59.1261	108.956	155.288	202.748	235.037	173.531	134.394	1.36204	0.00390365	2.57048
Ch25h	26.4073	16.366	24.3011	75.1499	111.645	91.7891	36.1817	36.9043	32.9399	57.2736	43.2054	67.7194	51.6569	1.36049	1.06622e-05	2.56772
Hdx	287.772	358.127	364.516	862.929	809.124	745.272	326.517	303.143	330.576	813.285	999.773	785.121	582.18	1.35361	2.42634e-49	2.55552
Sall1	62.2941	55.837	55.2298	89.8344	115.246	76.7192	70.5983	79.0807	77.6441	279.495	236.766	223.262	118.501	1.3517	0.000116146	2.55213
Mmp9	6219.94	6287.44	5761.57	22745.4	13782.7	6006.02	4095.59	4734.3	4509.24	17730.8	11287.8	8923.08	9340.32	1.34828	3.85907e-05	2.54609
Col6a6	132.714	133.816	238.593	412.893	436.975	369.896	217.972	171.342	161.17	517.753	394.897	541.755	310.815	1.34417	3.63621e-15	2.53885
Glt1d1	43.3351	24.0677	38.6608	119.203	109.244	68.4993	51.1838	21.9669	25.8814	75.6011	82.0903	65.6031	60.4447	1.33777	3.61138e-06	2.52761
Gm19203	14.8964	32.732	15.4643	50.1	38.4154	43.8395	51.1838	36.9043	35.2928	106.529	133.937	96.2885	54.6319	1.33615	0.00410474	2.52476
Gm3194	53.4917	15.4033	83.9492	146.845	105.642	124.669	60.0086	14.0588	70.5856	142.038	139.121	87.8235	86.9697	1.33219	0.0026362	2.51785
Ly6a	12.188	13.4779	15.4643	31.0965	31.2125	46.5795	8.82479	16.6948	17.6464	27.4913	31.972	41.2665	24.4929	1.32265	1.40072e-05	2.50125
Gm14435	62.2941	146.331	57.4389	200.4	230.492	134.259	72.3633	93.1395	76.4677	161.512	367.246	170.356	147.692	1.31848	2.1713e-05	2.49403
Cass4	19.6362	16.366	15.4643	35.4155	54.0216	41.0996	15.8846	16.6948	12.9407	41.237	38.0208	34.9178	28.4749	1.3097	6.74772e-07	2.47889
Scn8a	288.449	203.131	218.71	535.551	672.269	712.393	365.346	303.143	356.457	827.031	778.561	776.656	503.141	1.30944	1.13515e-15	2.47845
Htr7	63.6484	30.8066	33.1379	109.702	130.852	45.2095	21.1795	13.1801	9.41141	63.0009	44.0695	34.9178	49.9263	1.30891	0.0214981	2.47755
Trpm6	13.5422	14.4406	16.5689	26.7776	40.8164	31.5097	16.7671	10.5441	21.1757	44.6734	39.749	42.3246	26.5741	1.29651	8.93057e-06	2.45634
Ctse	11.5109	16.366	14.3597	45.781	38.4154	41.0996	11.4722	14.0588	23.5285	26.3458	34.5643	32.8016	25.8587	1.29132	2.06081e-05	2.44752
Gjb2	153.704	113.599	164.585	393.026	444.178	431.546	107.662	136.195	94.1141	229.094	195.288	193.635	221.386	1.2902	1.96724e-06	2.44561
D830030K20Rik	5.41688	18.2914	6.62757	39.7345	26.4106	32.8797	14.1197	18.4522	8.23498	27.4913	31.972	14.8136	20.3704	1.28686	0.00485784	2.43996
Kbtbd13	23.6989	20.2168	24.3011	67.3758	51.6207	54.7994	23.8269	14.9375	21.1757	49.2553	52.7106	35.9759	36.6579	1.28597	3.2048e-07	2.43846
Gm10240	1190.36	895.317	402.073	3803.28	2130.85	3049.59	1999.7	1237.17	1549.35	2939.28	2457.52	3314.02	2080.71	1.28241	0.000649388	2.43244
Gm13370	1190.36	895.317	402.073	3803.28	2130.85	3049.59	1999.7	1237.17	1549.35	2939.28	2457.52	3314.02	2080.71	1.28241	0.000649388	2.43244
Gpr25	45.3664	19.2541	36.4516	136.479	122.449	56.1694	36.1817	38.6617	12.9407	68.7283	25.9232	51.8476	54.2044	1.28151	0.00917881	2.43093
Lrp1b	34.5326	47.1726	38.6608	81.1965	76.8308	39.7296	88.2479	32.511	47.057	182.13	162.452	156.601	82.2602	1.28097	0.00301052	2.43003
Scube2	38.5953	33.6947	41.9746	87.243	60.024	83.5691	39.7116	33.3896	23.5285	74.4557	96.7801	110.044	60.2509	1.27702	3.40524e-09	2.42337
Cmah	2196.55	2318.2	2219.13	5364.15	4390.16	5281.3	1644.94	1506.93	1791.7	4475.36	4755.19	3751.02	3307.88	1.26258	2.27777e-24	2.39925
Dmrt2	389.338	270.52	217.605	230.633	638.656	683.623	518.898	491.179	298.812	1576.17	1469.85	609.474	616.23	1.2519	0.0199469	2.38155
Tmem215	14.8964	19.2541	17.6735	45.781	38.4154	43.8395	8.82479	21.0882	36.4692	46.9643	47.5259	52.9057	32.8032	1.24904	0.000108427	2.37684
Rpl13-ps6	15.5735	39.471	11.046	72.5586	39.6159	41.0996	7.05983	33.3896	28.2342	60.71	43.2054	61.3707	37.7779	1.24859	0.0059347	2.3761
Cd5	24.376	22.1422	23.1965	46.6448	68.4274	56.1694	30.0043	20.2095	27.0578	74.4557	65.6722	37.034	41.2825	1.24303	1.32117e-06	2.36695
Pde9a	326.367	323.469	291.613	731.632	735.895	838.431	286.806	294.356	304.694	703.32	637.712	692.007	513.859	1.24301	1.27716e-55	2.36693
Kcns1	100.889	103.972	132.551	272.958	312.125	156.178	120.017	142.345	119.995	347.078	288.612	320.609	201.444	1.2419	3.74835e-11	2.3651
Gm14226	30.47	27.9185	36.4516	64.7844	68.4274	86.3091	40.5941	25.4816	36.4692	83.6194	82.0903	79.3586	55.1645	1.23933	1.55896e-10	2.36089
Zfp993	163.184	124.189	149.12	247.908	322.929	321.947	99.7202	88.7462	92.9377	263.458	292.069	250.773	201.415	1.23694	1.52335e-12	2.35697
6430531B16Rik	31.1471	26.9558	34.2424	55.2827	67.2269	71.2393	21.1795	23.7242	28.2342	68.7283	62.2158	64.545	46.2268	1.23029	1.18855e-09	2.34613
Gjb6	37.9182	49.098	59.6481	98.4723	150.06	128.779	28.2393	46.5698	32.9399	65.2919	89.0031	63.4869	70.7922	1.22521	3.89226e-05	2.33789
Tmem178	75.1592	54.8743	57.4389	124.386	127.251	102.749	45.8889	64.1433	68.2327	182.13	163.316	154.485	101.671	1.22386	1.60995e-10	2.3357
Gm4366	9879.72	10170	10293.7	24046.3	20788.7	23040.4	8147.93	9018.72	8311.45	20790.3	20152.7	21290.3	15494.2	1.22078	5.14635e-62	2.33072
Gm4353	471.946	578.587	573.285	1142.8	1171.67	1256.28	449.182	444.609	464.688	1091.63	1200.25	1048.59	824.459	1.21393	1.02883e-45	2.31969
Trim34a	29.7929	51.9861	43.0792	94.1534	100.84	93.159	65.3035	32.511	72.9384	108.82	152.083	128.032	81.0582	1.21011	6.59353e-06	2.31355
Olfr1438-ps1	16.9278	33.6947	29.8241	83.7879	92.437	67.1293	30.0043	36.0257	54.1156	63.0009	60.4876	89.9398	54.7812	1.20712	1.95176e-05	2.30877
Rbm46	29.1157	40.4337	32.0333	57.0103	61.2245	83.5691	45.8889	22.8455	31.7635	80.183	103.693	78.3005	55.5051	1.20211	1.21302e-06	2.30076
Acta2	749.561	676.783	614.155	1602.34	1663.87	1985.11	594.791	576.411	505.863	1130.58	1102.6	1071.87	1022.83	1.20095	9.83663e-13	2.29891
Myh11	77.8677	77.9792	93.8906	111.429	129.652	120.559	90.0129	112.47	111.76	360.824	317.992	252.889	154.777	1.20017	0.000440442	2.29766
Apobec1	67.0339	93.3825	60.7527	114.021	157.263	167.138	59.1261	72.93	71.762	190.148	230.717	115.335	116.634	1.19814	5.41161e-08	2.29444
Olfr1372-ps1	710.966	880.876	677.117	1750.04	1715.49	1743.99	758.05	669.55	911.73	1712.48	1796.48	1833.71	1263.37	1.19727	2.17714e-48	2.29305
Sh2d5	48.0748	49.098	66.2757	126.114	139.256	73.9792	61.7736	43.0551	42.3513	134.02	134.801	99.4628	84.8551	1.1945	1.33186e-08	2.28866
En1	111.046	138.63	143.597	317.876	436.975	168.508	99.7202	174.856	101.173	303.55	183.191	349.178	210.692	1.19388	5.09831e-06	2.28767
Hrh3	47.3977	45.2472	23.1965	101.928	79.2317	69.8693	43.2415	35.147	17.6464	92.7832	82.0903	62.4288	58.3506	1.18811	1.32643e-05	2.27853
Gm14584	146.256	218.534	206.559	399.936	381.753	406.886	155.316	183.643	134.113	380.297	419.957	362.933	283.015	1.17351	4.86991e-21	2.25559
B3gnt7	109.692	95.3079	91.6814	277.277	244.898	234.268	124.43	118.621	103.525	239.404	188.376	259.238	173.893	1.16066	7.68453e-19	2.2356
Utp14b	624.973	602.654	511.428	1425.26	1219.69	1067.22	493.306	527.205	534.097	1342.49	1310.85	958.652	884.819	1.15277	1.3018e-26	2.2234
Cd59b	723.154	796.158	583.226	1642.93	1409.36	1319.3	570.082	591.348	474.1	1343.64	1610.7	981.931	1003.83	1.15142	8.86195e-15	2.22133
Gm7153	12.188	5.77624	12.1505	28.5052	19.2077	31.5097	11.4722	8.78675	21.1757	32.0732	24.195	21.1623	19.0169	1.14812	0.00298118	2.21625
Pdlim3	44.6893	23.105	34.2424	130.433	85.2341	31.5097	51.1838	54.4778	39.9985	132.875	99.3724	68.7775	66.3248	1.14735	0.00250581	2.21506
Plscr4	72.4508	121.301	88.3676	102.791	228.091	282.217	121.782	96.6542	121.172	166.093	234.173	357.643	166.061	1.14143	9.87139e-05	2.20599
Luzp2	20.3133	32.732	24.3011	29.3689	48.0192	38.3596	22.062	24.6029	15.2935	59.5645	74.3133	56.0801	37.0842	1.13543	0.000406229	2.19685
9330132A10Rik	24.376	40.4337	13.2551	53.5551	43.2173	39.7296	15.8846	14.9375	17.6464	42.3825	57.8952	41.2665	33.715	1.13511	0.000815572	2.19635
Tbx15	390.016	736.47	964.311	1899.48	1298.92	424.696	435.062	282.055	242.344	955.323	697.335	1421.05	812.255	1.13497	0.0408024	2.19614
Gm14399	150.996	103.01	161.271	291.962	264.106	308.247	176.496	152.011	151.759	326.459	388.849	378.805	237.831	1.13026	2.16483e-14	2.18898
Lrrtm1	335.17	355.239	572.18	810.237	1190.88	705.543	436.827	283.812	251.755	978.233	634.255	569.266	593.616	1.12912	1.62919e-06	2.18726
Zfp708	90.7328	135.742	91.6814	171.031	210.084	97.269	33.5342	69.4153	103.525	239.404	269.602	155.543	138.964	1.12735	0.00124008	2.18457
Poli	402.204	452.472	392.131	906.982	945.979	960.36	444.77	444.609	494.099	1005.72	1036.07	879.293	697.057	1.12698	5.62804e-56	2.18401
Dtx4	525.438	545.855	603.109	1450.31	1415.37	923.371	454.477	463.94	515.275	911.795	1015.33	1027.43	820.974	1.11879	1.04532e-15	2.17165
Gm3383	67.0339	18.2914	104.937	146.845	105.642	136.999	79.4231	22.8455	74.1148	155.784	150.355	97.3466	96.6347	1.11661	0.00908331	2.16836
St6galnac5	375.796	579.549	482.708	1058.15	1183.67	924.74	420.06	426.157	458.806	958.76	1014.46	786.179	722.42	1.11336	7.09543e-20	2.16348
Gm18609	41.3037	37.5455	51.916	94.1534	86.4346	68.4993	41.4765	32.511	38.8221	92.7832	86.4108	93.1141	63.7475	1.10904	3.19028e-10	2.15702
Masp1	58.9086	105.898	153.539	219.403	273.71	260.297	52.9488	65.9006	63.527	99.656	113.198	112.16	131.596	1.10873	0.0053882	2.15656
Ttc6	20.9904	27.9185	26.5103	45.781	38.4154	41.0996	20.297	28.9963	19.9992	80.183	65.6722	39.1503	37.9178	1.10635	0.000212434	2.153
Ccr5	55.523	61.6132	68.4849	123.522	127.251	120.559	82.0706	80.8381	76.4677	161.512	205.658	169.298	111.066	1.10298	1.02597e-08	2.14798
Capza1	4734.36	4940.61	4360.94	10192.8	9873.96	10013.2	4562.42	4575.26	4537.47	9736.51	10518.8	8965.41	7250.97	1.09743	1.1149e-124	2.13973
Npbwr1	23.0217	19.2541	11.046	19.0034	34.8139	32.8797	11.4722	15.8161	10.5878	40.0915	40.6131	31.7434	24.1953	1.09728	0.0023914	2.1395
Bst1	19.6362	34.6574	25.4057	57.8741	73.2293	64.3893	15.0021	24.6029	31.7635	40.0915	49.2542	35.9759	39.3235	1.09595	0.000371559	2.13754
Gm15823	8.80243	14.4406	19.8827	19.8672	31.2125	31.5097	12.3547	16.6948	5.88213	26.3458	25.9232	31.7434	20.3883	1.09076	0.00320084	2.12986
Tmprss2	10.1567	13.4779	7.73217	18.1396	27.6111	21.9198	21.1795	14.9375	9.41141	40.0915	46.6618	9.52303	20.0702	1.08805	0.0401933	2.12587
Fgf8	23.6989	24.0677	13.2551	29.3689	45.6183	39.7296	12.3547	7.0294	8.23498	36.6551	17.2822	23.2785	23.3811	1.08756	0.0211281	2.12514
Tmem108	169.955	116.487	134.761	222.858	290.516	371.266	175.613	137.952	116.466	295.532	286.884	343.887	221.848	1.07991	2.07099e-11	2.1139
Fam19a2	178.08	136.704	87.263	228.041	331.333	209.608	104.133	82.5954	70.5856	205.039	245.407	176.705	171.291	1.07469	3.15008e-05	2.10628
Tmprss11d	149.641	156.921	183.363	292.826	230.492	401.406	118.252	99.2903	83.5262	198.167	239.358	305.795	204.92	1.07407	5.94994e-06	2.10537
Gm6710	178.08	163.66	165.689	538.143	386.555	360.306	259.449	249.544	217.639	410.079	439.831	442.292	317.606	1.06424	4.93054e-12	2.09107
Cyp4a31	16.2506	11.5525	9.94136	21.5948	37.2149	34.2496	13.2372	20.2095	15.2935	29.7823	25.9232	33.8597	22.4258	1.05228	0.00128522	2.0738
Nmnat3	105.629	97.2333	79.5308	219.403	206.483	201.388	106.78	91.3822	99.9962	185.566	184.919	209.507	148.985	1.05017	2.79535e-20	2.07077
Aldh3a1	27.7615	33.6947	17.6735	55.2827	70.8284	52.0595	27.3569	14.0588	19.9992	42.3825	44.0695	27.511	36.0565	1.04467	0.0021265	2.0629
Slc26a11	505.124	534.302	552.298	1229.18	1198.08	1063.11	671.567	553.565	694.091	1410.08	1221.85	1084.57	893.15	1.03982	9.51171e-25	2.05597
Kcns2	26.4073	30.8066	68.4849	63.9206	90.0361	50.6895	43.2415	29.8749	41.1749	99.656	71.721	112.16	60.6811	1.03686	0.00127036	2.05175
Lrrc4c	41.3037	21.1795	14.3597	27.6414	48.0192	45.2095	39.7116	37.783	29.4106	104.238	75.1774	78.3005	46.8612	1.03271	0.0164546	2.04586
Art4	24.376	16.366	19.8827	32.8241	45.6183	34.2496	21.1795	19.3308	16.47	50.4008	42.3413	38.0921	30.0943	1.03198	8.83806e-05	2.04483
Magohb	328.398	443.808	331.379	771.367	703.482	679.513	355.639	348.834	329.399	736.538	823.495	648.624	541.706	1.03123	3.65319e-27	2.04376
Ptprn2	20.3133	11.5525	7.73217	22.4586	39.6159	34.2496	22.9445	27.2389	15.2935	53.8372	36.2925	31.7434	26.9393	1.03049	0.00967504	2.04271
Gm14443	144.224	159.809	132.551	290.234	306.123	304.137	159.729	171.342	155.288	311.568	379.343	285.691	233.337	1.0255	1.60253e-21	2.03567
Slc7a11	217.352	204.094	225.337	386.115	364.946	487.715	271.804	224.062	279.989	591.063	533.155	525.883	359.293	1.02359	1.33885e-12	2.03297
Cdh15	13.5422	23.105	22.0919	61.3293	20.4082	21.9198	15.0021	27.2389	14.1171	63.0009	28.5156	37.034	28.9421	1.02246	0.0228888	2.03138
Tmem181a	2298.11	2590.64	2220.24	5086.87	4735.9	4055.16	2198.26	2026.22	2237.56	4576.16	4881.35	4198.6	3425.42	1.02118	2.23604e-44	2.02958
Hjurp	11762.1	11937.6	12036.8	21342.6	22962.8	26333.9	10876.6	10607.4	10797.2	21113.3	22708.8	23426.7	17158.8	1.01939	1.2278e-62	2.02707
Gm8925	11.5109	14.4406	14.3597	20.731	12.0048	23.2898	9.70727	17.5735	9.41141	36.6551	38.0208	24.3366	19.3368	1.01564	0.0167724	2.0218
Pcp4l1	427.257	500.607	446.256	1014.96	837.936	546.624	283.276	241.636	132.936	673.537	653.266	377.747	511.336	1.0139	0.0141619	2.01936
Angptl1	438.09	552.593	660.548	1116.02	1326.53	776.782	330.047	412.977	490.57	920.959	875.341	792.528	724.416	1.01118	5.72666e-08	2.01556
Adarb2	567.418	519.861	421.955	1113.43	917.167	819.252	444.77	468.334	431.748	973.651	1142.35	774.54	716.206	1.00751	6.50258e-17	2.01044
Ms4a7	31.1471	33.6947	43.0792	79.4689	58.8236	76.7192	37.9466	23.7242	35.2928	81.3285	58.7593	53.9639	51.1623	1.00516	8.36375e-06	2.00717
Prdm9	164.538	202.168	202.141	380.932	421.369	346.606	206.5	195.066	235.285	423.825	438.967	390.444	300.653	1.0037	4.55379e-23	2.00514
Pde11a	13.5422	18.2914	25.4057	46.6448	44.4178	23.2898	15.0021	26.3602	34.1164	50.4008	52.7106	42.3246	32.7089	1.00046	0.0037134	2.00063
Coro2b	639.869	476.54	527.996	1156.62	1048.02	853.501	538.312	483.271	449.395	1185.56	994.588	976.64	777.526	0.994489	2.60861e-20	1.99237
Ubap1l	9.47954	11.5525	13.2551	25.05	27.6111	30.1397	18.5321	13.1801	17.6464	22.9094	30.2438	28.5691	20.6807	0.993278	0.00216823	1.9907
Palm2	124.588	109.749	134.761	213.357	278.512	245.227	155.316	115.985	134.113	225.658	212.571	358.701	192.378	0.985161	2.62826e-09	1.97953
Cdh7	22.3446	28.8812	54.1252	41.462	37.2149	61.6494	59.1261	43.0551	44.7042	159.221	101.965	92.056	62.1503	0.973399	0.0366121	1.96346
Vill	529.5	496.756	490.44	796.417	1189.68	1097.36	653.035	574.653	719.973	994.269	1305.67	1413.64	855.116	0.972858	1.13028e-10	1.96272
Abhd14a	727.894	701.813	701.418	1453.76	1510.2	1398.76	802.174	786.414	889.378	1625.42	1424.91	1624.21	1137.2	0.972603	1.03838e-40	1.96238
Sstr1	59.5857	85.6809	55.2298	138.207	184.874	82.1992	73.2458	73.8087	52.9392	116.838	45.7977	219.03	98.953	0.972486	0.0111538	1.96222
Scn1b	146.256	97.2333	115.982	324.786	310.925	238.378	177.378	171.342	182.346	320.732	192.696	357.643	219.641	0.970262	4.45312e-06	1.9592
Rab3d	672.371	606.505	609.736	1457.22	1252.1	1008.31	571.847	614.194	558.802	1210.76	1132.85	1050.71	895.45	0.968735	2.37854e-24	1.95712
Gm12080	15.5735	22.1422	24.3011	42.3258	26.4106	32.8797	27.3569	18.4522	18.8228	49.2553	59.6235	33.8597	30.9169	0.966887	0.00261821	1.95462
Trpm3	55.523	51.0234	71.7987	114.021	105.642	98.639	155.316	105.441	110.584	302.405	192.696	257.122	135.018	0.963237	0.0232009	1.94968
Sorcs3	31.1471	42.3591	15.4643	65.6482	84.0337	41.0996	40.5941	52.7205	51.7627	69.8738	99.3724	94.1722	57.354	0.961719	0.00564828	1.94763
Gm45623	109.015	81.83	102.727	263.457	182.473	130.149	79.4231	81.7168	30.5871	207.33	89.8672	73.0099	119.299	0.960329	0.0204719	1.94575
Cnnm1	69.7424	86.6436	85.0538	161.529	135.654	75.3492	42.359	67.658	45.8806	140.893	159.86	97.3466	97.3308	0.96016	0.0005238	1.94553
Upk3bl	236.311	172.324	203.245	265.184	332.533	513.745	230.327	258.33	151.759	569.299	379.343	380.921	307.777	0.958074	6.47363e-06	1.94271
Pgam2	39.2724	27.9185	50.8114	82.9241	88.8356	63.0194	36.1817	57.9925	45.8806	90.4923	96.7801	75.1262	62.9362	0.955489	1.61156e-05	1.93924
Lrrc73	69.0652	48.1353	57.4389	120.067	123.65	82.1992	71.4808	74.6874	74.1148	153.493	136.529	148.136	96.5831	0.954448	9.69526e-07	1.93784
Astn1	566.064	386.045	396.55	837.015	1124.85	778.152	431.532	401.554	407.043	804.121	729.307	754.436	634.723	0.95444	1.30024e-12	1.93783
Cd164l2	29.1157	16.366	24.3011	33.6879	45.6183	63.0194	22.9445	20.2095	19.9992	45.8189	42.3413	30.6853	32.8423	0.949645	0.00125687	1.9314
Myo5b	100.212	85.6809	78.4262	169.303	141.657	220.568	99.7202	83.4741	88.2319	183.275	156.404	171.415	131.531	0.949591	2.61089e-11	1.93132
Gm11231	6.09399	12.5152	12.1505	22.4586	16.8067	23.2898	17.6496	8.78675	7.05856	17.1821	17.2822	26.4529	15.6439	0.948085	0.0282295	1.92931
C1ql3	23.6989	32.732	20.9873	37.1431	49.2197	34.2496	27.3569	16.6948	19.9992	49.2553	62.2158	40.2084	34.4801	0.947253	0.00102022	1.9282
Crtac1	945.246	701.813	640.665	1559.15	1204.08	912.411	963.667	680.094	674.092	2230.23	1628.84	1346.98	1123.94	0.947074	3.39329e-06	1.92796
Klhl32	160.475	168.474	152.434	360.201	332.533	258.927	211.795	123.893	155.288	310.423	337.866	267.703	236.668	0.943472	6.21006e-11	1.92315
Fcrls	114.432	110.711	112.669	201.264	291.717	242.488	163.259	178.371	161.17	269.186	286.02	324.841	204.677	0.942981	1.12998e-07	1.9225
Cbln2	81.9303	108.786	79.5308	229.769	186.075	93.159	91.7779	51.8418	61.1741	120.275	116.655	166.124	115.591	0.942741	0.000975623	1.92218
Zfp14	323.659	388.933	320.333	741.134	671.069	567.174	331.812	382.224	391.75	712.483	796.708	603.125	519.2	0.940067	1.87839e-19	1.91862
Sox15	11.5109	17.3287	5.52298	25.9138	24.0096	24.6597	11.4722	11.4228	9.41141	19.473	12.9616	22.2204	16.3256	0.934141	0.0242313	1.91075
Olfml2a	782.062	926.124	1083.61	1508.18	1809.12	2123.48	675.097	729.3	830.557	1195.87	1206.29	1760.7	1219.2	0.933974	2.26326e-08	1.91053
3000002C10Rik	268.813	240.677	227.547	475.95	470.589	421.956	238.269	243.393	274.107	498.28	483.036	498.372	361.749	0.932975	1.11833e-33	1.90921
Clcn6	2131.54	1830.1	1951.82	3836.1	3884.76	3803.08	2229.14	2010.41	2097.57	4045.81	3818.49	4011.31	2970.84	0.932945	1.90405e-77	1.90917
Rpl29	12539.4	8701.9	10637.3	21004	19686.7	22780.1	12789.8	11639.8	11590.1	21444.4	18987	25319.6	16426.7	0.928298	1.50703e-20	1.90303
Cbln1	520.698	545.855	511.428	1605.79	1234.09	1179.56	1167.52	1122.07	1091.72	2124.85	1716.12	1568.13	1198.99	0.927207	0.00424947	1.90159
Trex1	203.81	95.3079	153.539	346.381	330.132	241.118	150.904	144.103	224.697	340.205	235.037	354.468	234.975	0.926609	1.77713e-05	1.9008
Ism2	215.998	158.847	163.48	341.198	350.54	283.587	203.853	172.22	175.287	427.261	413.044	256.064	263.448	0.924962	2.5168e-09	1.89863
Slc1a2	148.287	136.704	122.61	263.457	314.526	231.528	60.0086	50.9631	70.5856	96.2196	95.0519	119.567	142.459	0.92485	0.0432199	1.89849
Gm20637	12.8651	28.8812	23.1965	30.2327	51.6207	38.3596	18.5321	14.0588	25.8814	33.2187	43.2054	33.8597	29.4926	0.920794	0.00485913	1.89316
Abhd15	43.3351	33.6947	41.9746	130.433	87.6351	47.9495	44.124	38.6617	30.5871	69.8738	48.3901	55.022	55.9734	0.919845	0.00514298	1.89191
Tmem26	974.362	1244.78	1344.29	2403.93	2549.82	1553.56	852.475	672.186	588.213	1467.35	1547.62	1215.77	1367.86	0.919767	0.003417	1.89181
Pot1b	440.799	485.204	449.57	856.018	769.508	861.721	478.304	434.944	468.218	835.049	1064.58	810.516	662.869	0.917302	7.02613e-27	1.88858
Stk38l	1192.39	1213.01	1173.08	2063.6	2313.33	1963.19	1050.15	1096.59	982.316	2134.01	2421.23	1730.02	1611.08	0.912184	1.33886e-24	1.88189
Fam46b	23.6989	20.2168	33.1379	61.3293	48.0192	69.8693	39.7116	28.9963	37.6456	44.6734	54.4388	63.4869	43.7687	0.908309	0.000357339	1.87684
Gm42641	578.929	601.691	636.247	1077.15	1246.1	971.32	660.095	694.153	608.212	1265.75	1337.64	1180.86	904.845	0.90661	1.869e-25	1.87464
Gm13285	53.4917	62.5759	74.0079	147.709	108.043	102.749	88.2479	63.2646	64.7034	137.457	119.247	140.729	96.8521	0.9054	2.94595e-07	1.87306
Kcnip4	114.432	101.084	125.924	188.307	189.676	138.369	82.9531	69.4153	82.3498	175.257	191.832	193.635	137.769	0.905319	1.71242e-07	1.87296
Tmem200a	502.416	450.547	519.16	991.634	929.172	721.983	546.255	463.94	499.981	936.996	906.449	1081.39	712.494	0.902367	6.34412e-21	1.86913
Zdhhc14	262.719	184.84	250.743	402.527	469.388	356.196	213.56	171.342	165.876	467.352	350.828	292.04	298.951	0.901407	1.01926e-07	1.86789
Nr4a3	54.1688	70.2776	67.3803	142.526	154.862	91.7891	166.789	88.7462	128.23	252.004	152.947	278.284	137.334	0.900221	0.0204033	1.86635
Gpr132	33.8555	19.2541	22.0919	64.7844	44.4178	52.0595	22.062	17.5735	21.1757	30.9277	26.7873	37.034	32.6686	0.899175	0.010413	1.865
Slc44a5	266.781	360.052	378.876	786.051	649.46	453.465	310.633	304.9	316.459	594.5	585.865	531.174	461.518	0.898248	1.70049e-10	1.8638
Gdf10	352.774	533.339	673.803	993.361	1534.21	535.664	505.661	360.257	432.925	877.431	495.134	878.235	681.067	0.895048	0.00202709	1.85967
Ppef1	62.2941	76.0538	48.6022	181.396	105.642	45.2095	79.4231	146.739	114.113	205.039	218.619	219.03	125.18	0.890332	0.0490327	1.8536
Fggy	146.256	139.592	132.551	270.367	276.111	237.008	149.139	161.676	174.111	317.296	290.34	272.994	213.953	0.885564	4.32202e-17	1.84749
Il27ra	29.1157	39.471	38.6608	68.2396	69.6279	39.7296	24.7094	30.7536	30.5871	58.4191	48.3901	68.7775	45.5401	0.881688	0.000330531	1.84253
Mmrn1	345.326	317.693	426.374	671.167	620.649	667.183	466.832	338.29	422.337	592.209	748.318	961.826	548.184	0.881203	1.61825e-09	1.84191
Cdh13	1046.14	924.198	922.337	1401.07	1558.22	1663.16	1148.11	1201.15	1043.49	2238.25	2089.41	2521.49	1479.75	0.867754	5.66821e-09	1.82482
Adgre1	52.8146	74.1284	79.5308	142.526	165.666	124.669	77.6582	94.0182	101.173	143.184	137.393	153.427	112.182	0.866895	6.677e-07	1.82373
Gemin4	435.382	388.933	679.326	785.187	908.764	712.393	360.052	242.514	521.157	616.264	1061.99	695.181	617.262	0.865364	0.000266133	1.8218
Prss41	163.184	154.033	129.238	221.995	270.108	241.118	142.962	108.077	134.113	245.131	294.661	241.25	195.489	0.861116	2.27387e-11	1.81644
1700109H08Rik	138.808	159.809	165.689	248.772	212.485	339.757	157.964	121.257	159.994	264.604	294.661	272.994	211.399	0.856608	3.66593e-10	1.81078
Tmem252	541.688	645.976	722.405	908.71	1087.64	794.592	367.111	470.091	296.459	987.397	1141.49	589.37	712.743	0.856083	0.0003793	1.81012
Angptl4	861.284	1033.95	1350.92	1965.99	2194.48	2001.55	1291.95	1278.47	1448.18	2215.34	2290.75	2460.12	1699.42	0.855144	3.15096e-12	1.80894
Tmem59l	173.34	127.077	171.212	278.141	332.533	182.208	171.201	102.805	95.2905	284.077	222.94	222.204	196.919	0.853325	0.000108538	1.80666
Ctsh	93.4412	127.077	109.355	181.396	201.681	176.728	90.8954	100.169	70.5856	182.13	146.034	183.054	138.546	0.852263	2.79285e-08	1.80533
Arl5c	117.817	127.077	180.049	314.42	289.316	291.807	155.316	148.496	190.581	203.894	290.34	257.122	213.853	0.849524	9.43569e-08	1.80191
Serpinb6b	287.772	300.364	231.965	412.029	486.195	563.064	276.216	304.9	259.99	494.844	579.817	461.338	388.208	0.84725	1.05196e-14	1.79907
Cfap157	44.0122	33.6947	32.0333	71.6948	84.0337	64.3893	45.8889	29.8749	45.8806	84.7649	58.7593	53.9639	54.0825	0.845576	0.000207308	1.79698
Slc2a9	139.485	137.667	129.238	282.46	231.693	290.437	141.197	161.676	115.29	237.113	258.368	181.996	192.218	0.841635	2.83617e-09	1.79208
Nrg1	49.4291	34.6574	60.7527	57.8741	64.826	89.0491	52.0663	55.3565	47.057	137.457	112.334	74.068	69.5772	0.839038	0.00335499	1.78886
Aldh3b2	52.1375	23.105	43.0792	52.6913	69.6279	78.0892	26.4744	33.3896	29.4106	84.7649	40.6131	49.7314	48.5928	0.837631	0.00999142	1.78711
Kcnt1	65.6797	31.7693	44.1838	60.4655	112.845	75.3492	56.4787	34.2683	42.3513	79.0375	89.8672	77.2424	64.1282	0.83603	0.00167513	1.78513
Palmd	520.021	609.393	542.356	1040.01	881.153	1034.34	335.342	420.007	454.1	761.739	746.589	679.31	668.696	0.835872	4.63085e-07	1.78494
Fxyd1	220.738	231.05	235.279	435.351	464.586	379.486	239.152	270.632	337.634	483.389	407.859	559.743	355.408	0.835585	7.0672e-10	1.78458
Hpcal4	72.4508	50.0607	37.5562	133.024	116.447	61.6494	41.4765	43.9337	41.1749	75.6011	82.9544	42.3246	66.5544	0.832358	0.0177465	1.78059
Rasef	23.6989	19.2541	8.83676	40.5982	31.2125	32.8797	25.5919	16.6948	21.1757	43.5279	30.2438	28.5691	26.8569	0.830527	0.0115954	1.77833
Zfp663	34.5326	27.9185	25.4057	56.1465	54.0216	38.3596	24.7094	16.6948	28.2342	45.8189	47.5259	38.0921	36.455	0.829484	0.001915	1.77705
Trpv2	80.5761	60.6505	56.3343	128.705	142.857	94.529	75.8932	64.1433	57.6449	106.529	105.421	126.974	91.6881	0.825077	2.13754e-06	1.77163
Tceanc2	614.139	656.566	701.418	1117.75	1196.88	1200.11	693.629	750.388	787.029	1326.46	1291.84	1285.61	968.484	0.82222	4.09306e-29	1.76812
Sema4f	318.242	264.744	278.358	513.093	588.236	417.846	329.165	260.966	261.167	554.408	502.911	456.048	395.432	0.821817	4.96153e-14	1.76763
Foxe1	373.765	230.087	350.157	311.829	468.188	635.673	467.714	456.032	251.755	1080.18	723.258	548.104	491.395	0.821651	0.00839706	1.76743
Rpl34	10610.3	10578.2	10051.8	18976.7	18535.4	16790.5	10304.7	10920.2	10569	19155.7	20475.9	17454.7	14535.3	0.82153	4.98346e-61	1.76728
Spsb4	251.208	209.87	178.944	403.391	424.97	260.297	226.797	173.978	154.112	416.952	321.448	283.575	275.462	0.817199	5.14587e-06	1.76198
Cacfd1	3373.36	3092.21	3274.02	6291.86	6208.89	5742.98	3543.15	3501.52	3439.87	6407.77	5390.31	5594.25	4655.02	0.817053	2.7564e-47	1.7618
Serping1	187.56	241.639	265.103	364.52	415.366	354.826	151.786	144.981	196.463	323.023	292.933	337.539	272.978	0.816878	1.83697e-06	1.76159
Chsy3	272.875	330.208	338.006	692.762	690.277	465.795	288.571	283.812	331.752	399.77	391.441	601.009	423.856	0.814661	3.27039e-06	1.75889
Ncam2	66.3568	52.9489	48.6022	55.2827	90.0361	87.6791	43.2415	33.3896	35.2928	95.0742	74.3133	95.2303	64.7873	0.813907	0.0013418	1.75797
Fxyd2	34.5326	24.0677	32.0333	53.5551	44.4178	42.4696	39.7116	29.8749	18.8228	68.7283	49.2542	58.1963	41.3053	0.810853	0.00205992	1.75425
Rxfp3	157.09	167.511	139.179	272.095	342.137	167.138	302.69	162.555	238.814	383.733	476.124	402.084	267.596	0.809078	0.00626396	1.75209
Hbb-bh1	48.0748	66.4267	72.9033	132.16	100.84	83.5691	47.6539	36.9043	35.2928	74.4557	91.5955	51.8476	70.1437	0.804314	0.0094145	1.74631
Pls1	66.3568	84.7182	85.0538	173.622	134.454	97.269	106.78	96.6542	82.3498	169.53	191.832	138.613	118.936	0.803464	8.48846e-05	1.74529
Prrt4	81.2532	64.5013	57.4389	77.7413	87.6351	65.7593	65.3035	79.0807	50.5863	225.658	133.073	105.811	91.1535	0.801305	0.0227504	1.74268
Dmrta2	183.497	94.3452	104.937	148.572	216.087	228.788	165.024	181.886	105.878	371.133	275.65	221.146	191.412	0.800981	0.00444394	1.74229
Adra1d	25.7302	16.366	33.1379	75.1499	62.425	28.7697	30.8868	31.6323	25.8814	36.6551	25.0591	55.022	37.2263	0.795834	0.0487089	1.73608
Pde3a	815.918	878.951	956.579	1655.89	1340.94	1531.64	647.74	607.164	715.267	1209.62	1134.57	1149.11	1053.62	0.795786	2.55978e-08	1.73602
Efhd1	44.0122	79.9046	56.3343	122.659	104.442	61.6494	43.2415	41.2977	32.9399	80.183	79.4979	66.6612	67.7352	0.795701	0.00802621	1.73592
Lrrtm3	166.569	182.914	133.656	330.833	265.306	168.508	285.923	221.426	157.641	485.68	429.462	311.086	261.584	0.794437	0.00619877	1.7344
Rims1	106.983	75.0911	61.8573	167.576	171.669	130.149	139.432	126.529	175.287	235.967	224.668	256.064	155.939	0.794088	0.00788262	1.73398
Nanos3	35.2097	22.1422	37.5562	61.3293	56.4226	49.3195	35.2992	42.1764	41.1749	84.7649	63.944	52.9057	48.5204	0.793337	0.00123954	1.73308
Nme6	526.115	443.808	455.093	783.46	857.143	795.962	429.767	446.367	463.512	804.121	769.056	790.412	630.401	0.791678	5.76521e-34	1.73109
Cdh10	339.909	398.56	353.47	686.715	714.286	591.834	435.062	511.389	507.04	770.902	858.923	772.424	578.376	0.790668	3.06356e-09	1.72988
Dusp27	51.4604	57.7624	71.7987	124.386	93.6375	75.3492	37.9466	68.5366	50.5863	91.6377	75.1774	120.625	76.5753	0.788089	0.000948573	1.72679
Sgpp2	47.3977	38.5083	58.5435	99.3361	70.8284	57.5394	27.3569	35.147	30.5871	66.4374	76.9056	37.034	53.8018	0.786305	0.0157337	1.72465
Crabp1	1034.62	781.718	1006.29	1933.17	1726.29	1135.72	582.436	572.017	484.687	1101.94	730.171	1063.41	1012.71	0.785237	0.0260598	1.72337
Galnt16	455.018	517.936	573.285	963.992	1057.62	769.932	533.018	481.514	454.1	812.139	755.23	817.923	682.643	0.780928	1.95239e-13	1.71824
Ncoa7	699.455	823.114	733.451	1353.56	1169.27	1161.75	662.742	703.819	694.091	1245.13	1360.11	1101.5	975.665	0.778036	5.03466e-24	1.71479
Mocos	29.7929	25.0304	22.0919	31.9603	64.826	67.1293	37.9466	19.3308	22.3521	49.2553	27.6515	31.7434	35.7592	0.777279	0.042396	1.71389
Zdhhc23	66.3568	27.9185	37.5562	66.512	74.4298	75.3492	32.6517	31.6323	21.1757	63.0009	52.7106	45.4989	49.5661	0.774277	0.0228083	1.71033
Tmem200c	52.1375	65.464	65.1711	121.795	94.838	82.1992	36.1817	41.2977	50.5863	90.4923	61.3517	78.3005	69.9846	0.772893	0.0021883	1.70869
Cep250	5025.51	4179.11	5052.42	7511.54	8960.39	8271.97	5169.56	5122.67	5124.51	8502.84	8321.36	9119.89	6696.82	0.772317	1.11884e-31	1.70801
Riox2	788.156	855.846	754.438	1327.65	1349.34	1232.99	728.928	695.91	749.383	1349.37	1335.91	1208.37	1031.36	0.771489	2.48511e-36	1.70703
Ccdc7b	20.9904	10.5898	18.7781	42.3258	28.8115	58.9094	26.4744	26.3602	24.7049	32.0732	31.1079	26.4529	28.9649	0.770848	0.0391976	1.70627
Tfeb	283.709	200.243	266.207	501	469.388	358.936	315.928	252.18	208.227	477.662	385.392	414.781	344.471	0.770003	5.66374e-08	1.70527
Acmsd	34.5326	33.6947	34.2424	55.2827	48.0192	45.2095	35.2992	25.4816	34.1164	53.8372	63.944	67.7194	44.2816	0.769838	0.000466021	1.70508
Tagap	220.061	199.28	203.245	392.162	322.929	327.427	202.088	224.941	178.817	369.987	348.236	332.248	276.785	0.766358	7.37117e-17	1.70097
Baalc	16.2506	9.62706	15.4643	31.0965	21.6087	23.2898	24.7094	21.0882	24.7049	36.6551	34.5643	41.2665	25.0271	0.765534	0.0387753	1.7
Obscn	44.6893	23.105	25.4057	54.4189	39.6159	36.9896	37.0641	28.9963	30.5871	72.1647	55.3029	65.6031	42.8285	0.763424	0.0104022	1.69751
Zfp503	1515.37	1121.55	1432.66	2009.18	2172.87	1808.38	1526.69	1459.48	1032.9	3245.12	2210.39	2284.47	1818.26	0.762826	8.76899e-07	1.69681
Gm31166	12.188	13.4779	17.6735	25.9138	32.413	21.9198	14.1197	21.9669	19.9992	28.6368	31.972	25.3948	22.1396	0.762445	0.0209963	1.69636
Rasd2	90.0557	74.1284	59.6481	142.526	110.444	98.639	50.3013	42.1764	32.9399	95.0742	93.3237	55.022	78.6899	0.76203	0.0245437	1.69588
Spon2	181.466	131.891	174.526	235.815	249.7	319.207	163.259	205.61	208.227	414.661	324.905	261.354	239.218	0.761174	2.32851e-05	1.69487
Mcur1	613.462	730.694	674.908	1274.09	1345.74	1043.93	627.443	659.885	658.799	1061.85	1072.36	915.269	889.869	0.760675	1.9438e-14	1.69428
Arfgef2	1616.26	1643.34	1653.58	2805.6	2671.07	2812.58	1621.11	1548.23	1690.52	2807.55	2488.63	2959.55	2193.17	0.759722	2.25224e-55	1.69316
Pgbd5	228.863	153.07	182.258	286.779	320.528	230.158	188.851	165.191	134.113	295.532	311.943	336.481	236.147	0.754618	6.31023e-07	1.68719
Zbtb16	36.564	41.3964	41.9746	75.1499	82.8332	56.1694	75.8932	75.566	58.8213	87.0559	85.5467	168.24	73.7676	0.751745	0.0391976	1.68383
Syn3	73.1279	92.4198	86.1584	152.027	166.867	147.958	112.957	91.3822	117.643	164.948	149.491	178.821	127.817	0.751056	4.24422e-07	1.68302
Abcc6	88.0243	57.7624	80.6354	127.841	121.249	138.369	77.6582	59.7499	65.8799	107.674	104.557	128.032	96.4527	0.750409	6.8934e-06	1.68227
Pgm5	2375.3	1977.4	2791.31	3135.57	3789.92	3157.82	1662.59	1732.75	1452.89	3877.42	3472.85	2697.13	2676.91	0.747127	4.81476e-06	1.67845
Kirrel2	60.9399	67.3894	76.2171	114.884	117.647	149.328	73.2458	100.169	72.9384	112.256	111.47	151.31	100.65	0.745355	3.02685e-05	1.67639
Gm4631	3271.8	3984.64	3639.64	6361.83	5894.36	6258.1	3750.54	3850.35	4511.59	6453.59	7636.12	5945.55	5129.84	0.745229	7.01181e-18	1.67624
Cd52	24.376	18.2914	19.8827	41.462	39.6159	36.9896	15.8846	17.5735	22.3521	17.1821	36.2925	26.4529	26.3629	0.743665	0.0304113	1.67442
Has2	2484.32	2692.69	2784.68	4689.53	4851.14	3524.97	2626.26	2505.98	2425.79	4861.38	4473.49	3546.8	3455.59	0.741816	9.22465e-15	1.67228
Lrrc4	280.324	336.947	373.353	585.651	481.393	378.116	180.026	230.213	238.814	546.39	441.559	303.679	364.705	0.740813	0.00103727	1.67112
Kif17	39.9495	61.6132	58.5435	107.11	99.6399	64.3893	80.3056	75.566	90.5848	121.42	117.519	164.008	90.0541	0.739502	0.0115937	1.6696
Fbxl21	45.3664	47.1726	56.3343	86.3792	86.4346	71.2393	51.1838	53.5992	68.2327	96.2196	90.7313	99.4628	71.0297	0.73876	2.48928e-05	1.66874
Rspo3	1008.22	1165.84	923.441	1824.33	1866.75	1117.91	784.524	655.491	719.973	1447.88	1555.39	957.594	1168.94	0.738264	0.000302649	1.66817
Vstm2a	159.121	159.809	134.761	201.264	295.318	142.479	155.316	48.3271	97.6434	213.058	179.734	227.495	167.86	0.736623	0.0232738	1.66627
Mtus2	95.4726	52.9489	56.3343	116.612	172.869	128.779	111.192	101.926	128.23	139.748	202.201	149.194	121.292	0.736523	0.00786694	1.66616
Gm14419	20.9904	24.0677	28.7195	63.0569	19.2077	54.7994	35.2992	28.9963	35.2928	52.6917	46.6618	48.6733	38.2047	0.73029	0.0358586	1.65897
Cyfip2	1859.34	1660.67	1631.49	2727.86	2478.99	2930.4	1319.31	1299.56	1128.19	2245.12	2282.97	2102.47	1972.2	0.72993	5.90765e-08	1.65856
Mcoln3	36.564	58.7251	75.1125	78.6051	72.0289	127.409	45.0064	46.5698	48.2335	65.2919	91.5955	77.2424	68.532	0.729071	0.00621477	1.65757
Ppp2r5a	4420.18	4865.52	4918.76	7565.96	7397.36	7534.92	4346.21	4621.83	4609.24	7523.46	7658.59	8315.72	6148.15	0.727959	1.96602e-59	1.65629
Zfp939	163.861	144.406	143.597	251.364	249.7	201.388	133.254	137.073	168.229	249.713	279.107	234.902	196.383	0.725121	2.1246e-10	1.65304
Kctd11	455.695	480.39	466.139	948.444	768.308	728.833	557.727	545.657	477.629	942.723	782.882	743.855	658.19	0.721222	1.65315e-13	1.64858
Ptrh1	138.808	124.189	140.284	247.045	271.309	184.948	145.609	147.617	130.583	224.512	214.299	216.914	182.176	0.716729	1.49262e-09	1.64345
Ighm	52.8146	34.6574	36.4516	40.5982	82.8332	61.6494	40.5941	38.6617	38.8221	84.7649	61.3517	69.8356	53.5862	0.711537	0.0064424	1.63755
Mapre3	806.438	735.508	766.589	1255.09	1332.53	1157.64	814.528	869.009	861.144	1311.57	1284.93	1599.87	1066.24	0.710956	9.57803e-18	1.63689
Tfr2	67.711	49.098	39.7654	84.6517	84.0337	69.8693	43.2415	56.2352	63.527	88.2013	95.916	99.4628	70.1427	0.706396	0.000446496	1.63172
Ampd3	207.873	170.399	184.467	346.381	283.313	330.167	403.293	304.021	277.637	521.19	545.252	497.314	339.276	0.705923	0.0113466	1.63119
Rfx8	58.2315	68.3522	65.1711	82.9241	86.4346	87.6791	45.0064	36.0257	41.1749	100.802	78.6338	76.1843	68.8849	0.70394	0.00122963	1.62895
Alg1	626.327	589.176	661.652	1059.01	1117.65	1002.83	670.684	614.194	764.677	1109.96	934.965	1160.75	859.323	0.703099	3.17081e-18	1.628
Gm10163	8169.34	9059.07	8808.04	12214	15021.6	11028.4	6530.35	7821.96	6973.85	12219.9	16743.8	9815.07	10367.1	0.701969	3.50141e-07	1.62672
Ppfia2	224.801	161.735	125.924	211.629	324.13	226.048	104.133	106.32	127.054	178.694	209.978	237.018	186.455	0.701269	0.00463207	1.62593
1810032O08Rik	654.766	622.871	609.736	1100.47	1014.41	837.061	563.022	593.105	610.565	1051.54	1019.65	911.037	799.019	0.700985	1.31329e-19	1.62561
Ccdc88b	98.181	61.6132	101.623	138.207	136.855	83.5691	72.3633	76.4447	116.466	175.257	161.588	155.543	114.809	0.699807	0.00366773	1.62429
Doc2b	545.074	439.957	447.361	781.732	823.53	669.923	445.652	451.639	382.338	802.976	750.91	576.673	593.147	0.697356	9.02215e-10	1.62153
Cth	463.143	472.689	467.244	771.367	743.098	778.152	492.423	597.499	525.862	872.849	938.421	769.25	657.666	0.692353	4.27044e-14	1.61592
Adgrg6	1092.86	1726.13	1347.61	2515.36	2418.97	2272.81	1475.51	1671.24	2289.32	2584.18	2719.35	2989.17	2091.88	0.691765	1.50557e-05	1.61526
Nat8l	261.365	179.063	215.396	360.201	399.76	228.788	282.393	296.992	316.459	664.374	439.831	410.549	337.931	0.69084	0.00726885	1.61422
Lama1	784.094	853.921	873.735	1126.39	1174.07	1111.06	632.738	767.962	841.145	1548.68	1373.07	1328.99	1034.65	0.690059	3.42853e-10	1.61335
Abhd14b	470.592	494.831	514.741	800.736	899.16	876.791	703.336	571.139	770.559	1042.38	1014.46	1046.48	767.1	0.689834	1.35184e-06	1.6131
Gm16574	117.817	93.3825	110.46	171.895	175.27	156.178	105.898	87.8675	152.935	178.694	171.958	219.03	145.115	0.68951	2.63038e-05	1.61274
Sfrp2	9260.16	9188.07	10716.8	13318	19680.7	14741	12048.5	11585.3	11489	19907.2	16082.8	19895.7	13992.8	0.688772	2.16311e-08	1.61191
Naip2	34.5326	30.8066	29.8241	39.7345	46.8188	56.1694	27.3569	21.9669	18.8228	43.5279	43.2054	38.0921	35.9048	0.688454	0.00888135	1.61156
Gm5373	24.376	12.5152	19.8827	35.4155	30.012	34.2496	27.3569	21.9669	19.9992	33.2187	33.7002	38.0921	27.5654	0.688442	0.0191692	1.61154
Zscan22	726.539	767.277	685.954	1272.37	1230.49	1124.76	768.64	844.406	810.557	1270.33	1298.75	1209.43	1000.79	0.687834	1.09099e-27	1.61086
Mttp	300.637	383.157	349.052	578.741	607.443	705.543	367.111	388.374	451.748	564.718	530.562	613.707	486.733	0.686356	3.83711e-10	1.60921
Fam69c	321.627	405.299	446.256	671.167	558.224	438.395	254.154	295.235	327.046	449.025	535.747	638.043	445.018	0.686335	6.69473e-05	1.60919
Neb	83.2846	68.3522	68.4849	99.3361	123.65	123.299	77.6582	57.1139	67.0563	84.7649	127.888	122.741	91.969	0.685028	0.000100927	1.60773
Glis3	186.205	230.087	213.187	279.005	334.934	335.647	223.267	231.091	191.757	327.605	400.946	370.34	277.006	0.684315	2.71188e-09	1.60694
Cx3cr1	253.916	269.558	275.044	346.381	456.183	405.516	262.979	266.238	251.755	451.316	452.793	426.42	343.175	0.683628	2.87515e-14	1.60617
Gm8773	26.4073	23.105	23.1965	37.1431	43.2173	27.3997	20.297	13.1801	16.47	28.6368	32.8361	28.5691	26.7048	0.683278	0.0335142	1.60578
Gm8719	65.6797	45.2472	79.5308	139.071	98.4394	95.899	60.0086	54.4778	65.8799	82.474	108.014	67.7194	80.2033	0.68243	0.00458516	1.60484
Sync	20.9904	24.0677	17.6735	34.5517	33.6135	34.2496	29.1218	26.3602	28.2342	54.9826	37.1566	40.2084	31.7675	0.681491	0.0167941	1.6038
Gapdhs	115.786	89.5317	100.518	145.117	160.864	158.918	99.7202	85.2315	95.2905	153.493	162.452	164.008	127.578	0.681342	3.70466e-08	1.60363
Rec114	20.3133	33.6947	32.0333	44.9172	48.0192	53.4295	30.0043	26.3602	28.2342	48.1098	46.6618	30.6853	36.8719	0.679635	0.0101897	1.60173
Grid2	69.0652	123.226	141.388	171.895	222.089	135.629	113.84	118.621	116.466	202.748	172.822	181.996	147.482	0.679371	0.000755953	1.60144
Tgm2	927.641	1045.5	1078.08	1877.88	1788.72	1138.46	1043.09	1081.65	1088.19	1909.5	1738.59	1554.37	1355.97	0.677371	1.58799e-08	1.59922
Klf14	115.786	140.555	177.84	257.41	250.901	253.447	146.492	177.492	177.64	225.658	209.978	292.04	202.103	0.676663	4.90028e-06	1.59844
Gm14391	790.188	640.2	1022.86	1293.96	1136.86	1512.46	1001.61	588.712	1129.37	1419.24	1281.47	1601.99	1118.24	0.673589	0.000147239	1.59504
Bche	239.02	263.782	249.638	384.388	396.159	423.326	312.398	384.86	358.81	477.662	519.329	679.31	390.723	0.67288	0.000435656	1.59425
Tbx4	57.5544	43.3218	79.5308	108.838	142.857	61.6494	57.3612	38.6617	54.1156	82.474	69.9928	59.2544	71.3009	0.671022	0.0422616	1.5922
Matn2	1505.89	1724.21	1775.08	2671.71	2809.13	2297.47	2497.42	2634.27	2924.59	4423.81	4463.12	4069.51	2816.35	0.667	0.0193096	1.58777
Gm7997	21.6675	43.3218	50.8114	73.4224	40.8164	50.6895	24.7094	28.9963	35.2928	57.2736	54.4388	43.3827	43.7352	0.666367	0.0412923	1.58707
Tnfrsf13b	35.2097	31.7693	20.9873	54.4189	46.8188	50.6895	33.5342	32.511	34.1164	46.9643	49.2542	51.8476	40.6768	0.665422	0.00298447	1.58603
Serpinb10	197.039	226.236	181.154	361.929	292.917	358.936	198.558	164.312	143.524	254.295	308.487	187.286	239.556	0.665006	0.000577313	1.58557
Gata6	77.8677	71.2403	57.4389	120.931	133.253	67.1293	48.5364	35.147	61.1741	89.3468	68.2645	78.3005	75.7192	0.664055	0.0304705	1.58453
Spata1	245.791	258.968	286.09	370.567	346.939	493.195	250.624	202.974	295.283	372.278	398.354	452.873	331.161	0.662682	1.91929e-07	1.58302
Scn5a	67.0339	43.3218	57.4389	87.243	105.642	91.7891	69.7159	57.9925	74.1148	103.092	83.8185	114.276	79.6233	0.660618	0.000414738	1.58076
Mctp2	138.808	129.965	143.597	180.533	205.282	301.397	156.199	143.224	129.407	222.222	235.037	191.519	181.432	0.660571	8.45441e-06	1.58071
Gstp2	48.0748	44.2845	60.7527	116.612	96.0385	90.4191	72.3633	57.9925	71.762	99.656	57.8952	98.4047	76.1879	0.658918	0.00629182	1.5789
Abcg5	81.2532	62.5759	71.7987	159.802	122.449	86.3091	114.722	98.4116	111.76	168.384	178.87	133.322	115.805	0.658173	0.00902266	1.57808
Rccd1	971.653	901.093	898.036	1449.44	1554.62	1357.66	933.663	882.19	927.024	1452.46	1484.54	1400.94	1184.44	0.657343	5.04121e-42	1.57718
Cacng4	1451.72	1064.75	920.128	1575.56	1615.85	1567.26	1186.93	946.333	895.26	1925.54	1767.1	1746.95	1388.62	0.655858	2.32708e-07	1.57555
Map4k1	204.487	149.219	148.016	217.676	279.712	323.317	210.913	178.371	197.64	289.804	274.786	333.306	233.937	0.652634	1.37134e-05	1.57204
Rab6b	696.746	623.834	618.573	1087.51	1177.67	804.182	698.041	700.304	619.976	1137.45	1081	933.257	848.213	0.652327	6.68294e-11	1.5717
Acaa1a	1801.79	1691.48	1841.36	2365.93	3238.9	3107.13	2046.47	2094.76	2059.92	2761.73	3215.35	3431.47	2471.36	0.651382	4.09486e-11	1.57067
Slc8a1	413.714	376.418	412.014	656.482	709.484	567.174	480.069	331.26	472.923	728.52	592.778	645.45	532.191	0.650622	4.78275e-09	1.56985
Raet1d	125.943	121.301	136.97	220.267	236.495	173.988	139.432	130.923	119.995	198.167	222.076	160.833	165.532	0.648782	8.43992e-07	1.56784
Kcnq4	330.43	246.453	338.006	453.491	501.801	449.355	295.631	260.088	318.811	455.898	474.395	468.745	382.759	0.648541	1.0458e-11	1.56758
Khsrp	8102.98	7548.58	8103.31	12281.4	12304.9	12728.5	8239.71	8118.08	7845.58	12555.5	11016.5	14296.2	10261.8	0.648437	4.91997e-29	1.56747
Adgrg2	176.049	189.653	171.212	205.583	314.526	194.538	122.665	120.378	109.408	243.985	249.727	187.286	190.418	0.64772	0.00208304	1.56669
Spta1	22.3446	34.6574	48.6022	54.4189	51.6207	45.2095	30.8868	24.6029	28.2342	38.946	60.4876	41.2665	40.1064	0.647089	0.0282627	1.566
Gm6685	67.0339	43.3218	54.1252	93.2896	124.85	91.7891	72.3633	45.6911	99.9962	108.82	90.7313	87.8235	81.6529	0.646218	0.0118155	1.56506
Psg16	1216.77	1569.21	1365.28	2352.11	2208.88	2011.14	1419.91	1568.43	1538.77	2082.47	2897.35	2014.65	1853.75	0.645914	2.09184e-09	1.56473
9030617O03Rik	178.757	148.257	185.572	212.493	292.917	253.447	167.671	154.647	191.757	286.368	281.699	275.11	219.058	0.642438	8.09907e-08	1.56096
Gm3636	377.828	478.465	477.185	631.432	662.665	590.464	361.817	376.073	439.983	734.247	769.92	520.593	535.056	0.64179	2.87516e-07	1.56026
Homer2	434.028	429.367	425.269	691.034	771.909	471.275	437.71	353.227	323.517	688.429	527.97	595.719	512.454	0.639611	8.79676e-06	1.55791
Trf	119.849	151.145	130.342	234.088	220.888	226.048	137.667	152.011	150.583	190.148	190.968	244.425	179.013	0.638061	1.23227e-07	1.55624
C1qa	115.786	110.711	124.819	161.529	225.69	191.798	136.784	127.408	144.7	179.839	187.511	235.96	161.878	0.637933	4.65958e-06	1.5561
Fignl1	2041.49	2229.63	1897.69	2924.8	3007.2	3242.76	1835.56	1870.7	1632.88	2684.99	3299.16	2754.27	2451.76	0.637732	2.83661e-14	1.55588
Gm7162	186.882	192.541	205.455	307.51	306.123	279.477	195.91	199.459	248.226	320.732	339.594	343.887	260.483	0.636988	1.74918e-10	1.55508
Slc4a1	159.798	168.474	196.618	317.876	241.297	275.367	160.611	95.7756	127.054	158.075	200.473	217.972	193.282	0.636259	0.00719314	1.55429
Agtr2	589.763	929.012	1377.43	1214.49	1595.44	1667.27	1344.02	1055.29	1159.96	1756.01	1937.33	1855.93	1373.5	0.636013	0.002223	1.55403
Thnsl1	240.374	277.259	191.095	462.129	344.538	301.397	223.267	180.128	222.345	408.933	318.856	232.785	283.592	0.63303	0.000999855	1.55082
Pygl	385.953	538.153	509.218	842.198	800.721	648.003	428.002	527.205	654.093	804.121	792.387	814.748	645.4	0.632347	1.39953e-06	1.55008
Mblac1	148.287	123.226	114.878	211.629	238.896	204.128	128.842	183.643	145.877	231.385	197.881	229.611	179.857	0.631599	4.98185e-06	1.54928
Zfyve16	1653.5	1779.08	1867.87	2716.63	2587.04	2834.5	1660.83	1487.6	1752.87	2483.38	2555.17	2605.08	2165.3	0.630304	3.11471e-25	1.54789
Snx20	53.4917	34.6574	58.5435	95.0172	92.437	54.7994	63.5385	57.9925	54.1156	93.9287	79.4979	81.4748	68.2912	0.630161	0.0052306	1.54774
Tmem30b	1774.03	1955.26	1783.92	2667.39	2996.4	2746.82	1448.15	1572.83	1541.12	2420.38	2330.5	2433.66	2139.2	0.629735	8.17407e-12	1.54728
Pcdhga3	399.495	465.95	345.738	680.668	716.687	597.314	391.821	468.334	475.276	611.682	642.032	683.542	539.878	0.628083	7.66415e-11	1.54551
Tagln	1268.9	1029.13	784.262	1739.68	1740.7	1465.88	778.347	727.543	609.389	1138.6	1050.76	890.933	1102.01	0.625851	0.00887725	1.54312
Hs3st5	110.369	135.742	120.401	169.303	169.268	160.288	162.376	152.011	101.173	265.749	236.766	204.216	165.638	0.624193	0.00163701	1.54135
Smco3	31.1471	41.3964	53.0206	58.7379	60.024	60.2794	28.2393	35.147	42.3513	72.1647	39.749	63.4869	48.812	0.624084	0.0189722	1.54123
Kif26b	6414.27	5896.58	6693.85	9344.51	9857.15	7302.02	6700.67	6095.37	5919.78	12531.5	10664.8	8427.89	7987.36	0.623947	1.04346e-07	1.54109
Olfr318	55.523	60.6505	64.0665	104.519	118.848	73.9792	49.4188	44.8124	68.2327	76.7466	95.916	53.9639	72.223	0.621834	0.0148046	1.53883
Acss3	263.396	236.826	355.68	264.32	464.586	501.415	332.695	325.11	465.865	679.265	533.155	601.009	418.61	0.621765	0.0148643	1.53876
Gm5124	85.3159	51.0234	47.4976	95.881	84.0337	79.4592	82.0706	66.7793	47.057	111.111	101.965	116.393	80.7155	0.621459	0.00929186	1.53843
Ccdc59	1445.63	1720.36	1464.69	2506.73	2301.32	2054.98	1392.55	1489.35	1448.18	2215.34	2565.54	2124.69	1894.11	0.620911	2.1967e-16	1.53785
Clip4	641.901	683.522	738.974	933.76	1088.84	1085.03	693.629	624.738	684.68	1006.87	1031.75	1100.44	859.51	0.619485	6.00971e-22	1.53633
Paqr7	228.863	212.758	226.442	298.008	321.729	315.097	172.083	186.279	195.287	306.986	310.215	323.783	258.128	0.616254	1.70049e-10	1.53289
Rab32	307.408	399.523	282.776	515.684	516.207	409.626	314.163	368.165	342.34	572.736	559.078	507.895	424.633	0.615472	9.07328e-08	1.53206
Zfp647	417.777	351.388	391.027	582.196	578.632	513.745	422.708	438.459	362.339	689.574	607.468	676.135	502.621	0.612433	2.33281e-10	1.52883
D430041D05Rik	176.726	85.6809	106.041	145.117	154.862	180.838	120.9	108.956	90.5848	205.039	158.996	215.855	145.8	0.612289	0.00693887	1.52868
Efcab2	147.61	172.324	167.898	214.221	211.285	254.817	158.846	154.647	174.111	294.386	273.058	237.018	205.018	0.609919	3.97059e-07	1.52617
Snx22	257.302	165.585	165.689	318.739	309.724	245.227	255.037	215.275	218.815	355.096	329.225	393.619	269.111	0.609128	0.000302186	1.52534
Tnfrsf21	1238.43	1176.43	1194.07	2092.97	2187.28	1660.42	1216.06	1163.37	1081.14	1856.81	1564.04	1406.23	1486.44	0.606572	5.53319e-08	1.52264
Cpt1a	1686.68	1913.86	1894.38	2983.54	2989.2	2524.88	2073.83	2204.6	2475.2	3399.76	3401.99	3326.71	2572.89	0.60573	1.99334e-08	1.52175
Cyp26b1	6348.59	5630.87	6259.74	7765.49	9336.14	7488.34	5600.21	4379.32	3912.79	9109.94	8021.52	7125.35	6748.19	0.604081	5.6856e-06	1.52001
Rpl30	11711.3	9772.43	10460.5	18064.5	17399.8	15594.5	11210.1	11570.4	11358.4	17522.3	15760.5	15917.2	13861.8	0.60131	2.45238e-23	1.51709
Hs3st1	201.779	186.765	204.35	374.886	346.939	302.767	215.325	210.882	244.697	305.841	273.058	308.97	264.688	0.601273	6.40615e-08	1.51705
Sphk1	100.212	85.6809	133.656	148.572	141.657	147.958	133.254	101.926	111.76	148.911	183.191	237.018	139.483	0.600731	0.00264875	1.51648
Gm45038	83.9617	83.7555	98.309	158.074	81.6327	169.878	81.1881	83.4741	103.525	123.711	147.762	124.858	111.677	0.599734	0.00351205	1.51544
Prickle1	1422.61	1543.22	1699.97	2268.32	2618.25	1942.64	1270.77	1495.5	1256.42	2214.2	2083.36	2027.35	1820.22	0.598492	1.4095e-09	1.51413
Baiap3	79.899	67.3894	94.9952	133.024	103.241	108.229	147.374	95.7756	127.054	219.931	178.006	181.996	128.076	0.598121	0.049523	1.51374
Prrt1	215.321	160.772	139.179	328.241	333.734	193.168	219.737	185.4	221.168	361.969	287.748	222.204	239.053	0.597404	0.00428394	1.51299
Nmnat2	433.351	370.642	298.241	682.396	589.436	369.896	337.99	372.558	378.809	617.409	629.071	421.13	458.411	0.595301	0.000779346	1.51079
Slco2b1	111.723	115.525	113.773	152.027	202.881	179.468	133.254	122.136	121.172	185.566	187.511	177.763	150.233	0.593806	5.15986e-07	1.50922
Zdhhc20	5301.1	5612.58	5450.07	8001.31	7416.57	7800.7	5263.11	4685.09	5117.45	7772.03	8796.62	7627.95	6570.38	0.593576	7.82031e-26	1.50898
Itgb3	561.324	621.908	888.094	1138.48	991.597	717.873	390.938	366.407	421.16	737.684	657.586	652.857	678.826	0.592061	0.0283604	1.5074
Fas	50.7833	63.5386	78.4262	95.0172	93.6375	72.6093	57.3612	84.3528	63.527	116.838	100.237	117.451	82.8149	0.591983	0.00487467	1.50732
Eps8	752.947	722.992	724.614	905.255	1046.82	905.561	689.216	616.83	622.329	1406.64	1165.68	793.586	862.706	0.591552	3.61217e-05	1.50687
Gls2	190.945	173.287	208.768	296.281	325.33	283.587	166.789	184.522	242.344	300.114	274.786	270.877	243.136	0.591025	1.83302e-07	1.50632
Dctn3	763.103	688.335	658.339	1109.11	1094.84	1106.95	738.635	735.451	705.856	1120.27	971.257	1077.16	897.442	0.590897	1.25234e-23	1.50618
Tacr1	29.1157	40.4337	46.393	54.4189	68.4274	56.1694	54.7137	32.511	37.6456	72.1647	52.7106	57.1382	50.1535	0.587836	0.0185711	1.50299
Ctsf	420.485	517.936	459.512	727.313	783.914	779.522	635.385	652.855	772.912	917.523	905.585	1068.7	720.137	0.584772	0.000751252	1.4998
Ccdc60	33.8555	29.8439	46.393	62.1931	62.425	69.8693	60.8911	47.4484	64.7034	67.5828	64.8081	95.2303	58.7703	0.584727	0.0383023	1.49975
Cadm3	1368.44	1507.6	1347.61	1841.61	2355.34	1922.09	1349.31	1262.66	1401.12	2224.51	2013.37	1976.56	1714.18	0.582145	1.4794e-15	1.49707
Pcdhga12	346.68	274.371	382.19	449.172	644.658	423.326	342.402	454.275	329.399	531.499	540.932	597.835	443.062	0.581605	0.000144067	1.49651
Gfod1	414.391	435.143	382.19	561.465	639.856	493.195	294.748	288.205	251.755	455.898	546.98	394.677	429.875	0.580182	0.00156719	1.49504
Zfp960	281.001	306.141	310.391	476.813	481.393	432.916	269.156	230.213	358.81	442.152	493.406	292.04	364.536	0.580149	0.000299952	1.495
Tns1	4870.45	5093.68	5538.44	7228.22	7858.35	6777.32	5016.9	5100.71	4898.64	8032.05	7265.42	8450.11	6344.19	0.579906	1.47423e-21	1.49475
Slfn5	239.697	350.425	320.333	445.717	404.562	439.765	236.504	260.966	308.224	360.824	430.326	474.035	355.948	0.57939	7.71288e-06	1.49422
Grm8	55.523	69.3149	45.2884	88.9706	76.8308	86.3091	69.7159	64.1433	47.057	98.5106	113.198	61.3707	73.0194	0.579364	0.0122554	1.49419
Mt2	134.745	159.809	173.421	208.174	170.468	220.568	117.37	103.684	59.9977	218.785	171.958	130.148	155.761	0.57805	0.0431439	1.49283
Nckap1	8820.72	9628.99	8804.73	13690.2	12697.5	13454.6	7596.38	8421.22	7596.18	11954.1	12992.7	11151.5	10567.4	0.578048	1.52613e-14	1.49283
Noc2l	6061.49	5286.22	5420.25	9106.1	8988	7743.16	5656.69	5704.36	4982.16	8232.51	7660.32	7686.15	6877.28	0.577311	6.64864e-18	1.49207
Grid2ip	64.3255	63.5386	49.7068	84.6517	92.437	80.8292	75.0107	53.5992	78.8205	130.584	97.6442	87.8235	79.9142	0.577249	0.00564422	1.492
Cacna1e	271.521	137.667	149.12	240.998	248.5	273.997	201.205	172.22	234.109	325.314	338.73	312.144	242.127	0.575066	0.00541559	1.48975
Dusp18	572.835	591.102	576.599	833.56	899.16	871.311	629.208	630.889	754.089	1053.83	962.616	951.245	777.204	0.571505	1.53584e-10	1.48607
Gstp1	2626.51	2427.95	2446.68	4173.85	3783.92	3404.42	2752.45	2469.95	2486.96	3890.02	3379.53	3944.65	3148.91	0.569649	1.08232e-18	1.48416
Csmd3	42.6579	61.6132	37.5562	88.1068	67.2269	72.6093	79.4231	66.7793	65.8799	105.383	84.6826	105.811	73.1442	0.569635	0.0315172	1.48415
Glyctk	303.345	300.364	328.065	500.136	441.777	486.345	330.93	293.477	283.519	458.189	416.5	428.537	380.932	0.568856	1.43326e-12	1.48335
Fam78b	627.681	610.356	488.231	971.767	791.117	635.673	493.306	495.573	437.63	888.886	777.697	610.532	652.371	0.567993	0.000145913	1.48246
Sgk1	608.045	663.305	730.137	1112.56	830.733	695.953	635.385	783.778	768.206	1171.82	1213.21	1175.57	865.725	0.567979	0.000278261	1.48245
Pcdh19	1046.81	1118.66	934.487	1431.3	1663.87	1596.03	1253.12	909.428	1135.25	1697.59	1659.95	1406.23	1321.06	0.563132	2.5168e-09	1.47747
Zfp438	213.29	195.429	250.743	296.281	339.736	368.526	270.039	222.305	244.697	326.459	379.343	349.178	288.002	0.561945	4.11896e-07	1.47626
Ddah1	1577.67	1709.77	1714.33	2986.13	2593.04	1690.56	1082.8	1161.61	988.198	1717.06	1766.24	1399.89	1698.94	0.561655	0.0196435	1.47596
Naalad2	434.028	548.743	421.955	640.07	692.677	623.344	647.74	650.219	728.208	987.397	1204.57	909.979	707.41	0.56134	0.0133002	1.47564
Galnt5	866.701	1081.12	884.781	1400.21	1367.35	1082.29	646.857	557.08	509.392	959.905	1057.67	833.795	937.262	0.559629	0.0138655	1.47389
Htra3	656.797	640.2	762.171	1264.59	1038.42	602.794	487.129	507.874	428.219	824.74	708.569	685.658	717.263	0.557898	0.0159932	1.47212
Trmt61a	886.337	748.023	683.744	1256.82	1247.3	994.61	772.169	767.962	677.621	1144.33	998.045	1044.36	935.11	0.557533	7.52226e-09	1.47175
Gpc6	10397	10958.5	10115.9	12791	14121.3	14810.9	9882	8129.5	8438.5	14396.3	14599.1	14359.7	11916.6	0.554542	5.86431e-12	1.4687
Mcm6	9260.16	9757.99	9209.01	14511.7	14180.1	11612	8010.27	8812.23	8394.98	12687.2	13925.1	11558.8	10993.3	0.554298	9.08813e-13	1.46845
Rps3a3	37.9182	34.6574	30.9287	57.0103	70.8284	50.6895	42.359	40.419	44.7042	58.4191	40.6131	62.4288	47.5813	0.551806	0.0211565	1.46592
Zfp369	631.744	380.269	653.92	784.324	696.279	986.39	652.152	423.521	672.916	873.995	657.586	1006.27	701.614	0.551363	0.00470928	1.46547
Grid1	218.707	168.474	159.062	276.414	304.922	219.198	240.917	187.158	219.992	327.605	297.253	324.841	245.378	0.550828	0.000311403	1.46493
Rhbdl3	491.582	489.055	466.139	812.829	674.67	724.723	431.532	450.76	457.63	726.229	553.029	592.544	572.56	0.550351	1.67885e-07	1.46444
Tmem74b	86.6701	64.5013	60.7527	115.748	102.041	80.8292	74.1283	53.5992	63.527	107.674	82.9544	103.695	83.0101	0.549915	0.00538233	1.464
B3gnt5	837.585	763.426	657.234	1162.66	1129.65	1061.74	833.943	731.057	708.208	1097.36	1133.71	1060.23	931.401	0.54991	9.21745e-15	1.46399
Gm2830	50.7833	74.1284	39.7654	65.6482	75.6303	73.9792	63.5385	71.1727	49.4099	103.092	119.247	73.0099	71.6171	0.549223	0.0459532	1.4633
E2f2	1210	1024.32	1062.62	1620.47	1624.25	1345.33	986.612	889.219	782.323	1359.67	1543.3	1221.06	1222.43	0.548397	5.12633e-06	1.46246
Gpr62	41.3037	26.9558	45.2884	53.5551	69.6279	52.0595	33.5342	43.0551	43.5278	48.1098	62.2158	55.022	47.8546	0.547805	0.020425	1.46186
Mdga2	178.757	181.952	207.664	276.414	268.908	253.447	222.385	178.371	187.052	323.023	245.407	320.609	236.999	0.546962	3.35595e-06	1.46101
Cyb561	623.619	590.139	631.828	863.792	774.31	975.43	518.898	428.793	374.103	750.284	675.732	591.486	649.868	0.546276	0.00210203	1.46031
Gpr50	71.0966	37.5455	60.7527	88.9706	66.0264	69.8693	42.359	39.5404	70.5856	73.3102	70.8569	99.4628	65.8647	0.546141	0.0478389	1.46017
Vdr	301.991	361.978	347.947	539.007	460.985	468.535	271.804	337.411	289.401	437.57	360.333	520.593	391.463	0.54515	1.71289e-05	1.45917
Pcsk6	2277.12	2087.15	1938.56	3213.31	3433.38	2472.82	2099.42	2945.32	2359.91	3123.7	2810.08	4944.57	2808.78	0.544879	0.00197662	1.4589
Hyal1	880.92	894.354	796.413	1102.2	1226.89	1411.09	991.024	836.498	1009.37	1233.67	1518.24	1395.65	1108.03	0.544526	2.63303e-08	1.45854
Dennd1b	500.385	441.882	486.022	723.858	539.016	663.073	442.122	388.374	443.513	693.01	669.684	649.683	553.385	0.544255	6.68298e-09	1.45827
2810021J22Rik	396.11	461.136	500.382	722.994	698.68	648.003	505.661	509.631	564.684	697.592	769.92	726.925	600.143	0.543385	2.95572e-09	1.45739
Atp8a2	54.1688	43.3218	58.5435	60.4655	85.2341	79.4592	68.8334	51.8418	47.057	91.6377	72.5851	85.7073	66.5713	0.542758	0.00926021	1.45675
Ppm1l	1389.43	1262.11	1080.29	1623.93	1828.33	1837.15	1525.81	1467.39	1422.3	2292.09	2407.41	1874.98	1667.6	0.541931	1.08121e-05	1.45592
Nbeal2	364.285	250.304	358.993	445.717	474.19	572.654	406.823	382.224	421.16	594.5	484.765	609.474	447.091	0.54191	0.000266133	1.4559
Nebl	359.546	376.418	370.039	366.248	436.975	678.143	555.962	369.922	394.103	839.631	739.676	471.919	496.549	0.541531	0.0286932	1.45552
Rgag1	409.652	346.574	342.424	480.269	457.383	549.364	279.746	231.091	209.404	413.515	406.131	346.004	372.63	0.540932	0.00745277	1.45491
Sgip1	2189.1	2425.06	2390.34	3593.38	3122.45	3078.36	2098.54	2089.49	2438.73	3728.51	3474.58	2798.71	2785.6	0.539237	1.09525e-10	1.4532
Fam195a	83.9617	70.2776	65.1711	102.791	138.055	86.3091	74.1283	78.2021	62.3506	131.729	75.1774	101.579	89.1444	0.539073	0.0126192	1.45304
P2ry6	45.3664	50.0607	39.7654	61.3293	63.6255	76.7192	35.2992	54.4778	52.9392	73.3102	55.3029	75.1262	56.9435	0.538781	0.0122292	1.45274
Cygb	800.344	875.1	838.388	1237.81	920.769	1167.23	611.558	747.752	632.917	1209.62	967.801	1042.24	920.961	0.538192	1.29393e-05	1.45215
Lonrf2	1281.09	1032.98	1008.5	1866.66	1907.56	1186.41	1135.75	1107.13	1078.78	1764.03	1548.48	1375.55	1357.74	0.538038	3.06793e-05	1.452
Sema3d	2445.72	2518.44	2260	2920.48	3076.83	3505.79	2383.58	1853.13	1729.35	3454.74	3542.84	2651.64	2695.21	0.537476	7.66035e-06	1.45143
Zfp429	175.372	213.721	176.735	243.589	271.309	284.957	167.671	171.342	207.051	240.549	311.943	255.006	226.604	0.535742	4.56376e-06	1.44969
Pot1a	922.901	932.862	952.161	1370.84	1310.93	1457.67	1016.62	915.579	1037.61	1386.02	1477.62	1361.79	1178.55	0.535729	1.13628e-23	1.44967
Gng4	167.246	120.338	129.238	185.715	195.678	157.548	132.372	145.86	112.937	263.458	230.717	140.729	165.153	0.535385	0.00795043	1.44933
Krt8	991.967	902.056	631.828	966.584	1240.1	1442.6	1036.03	1071.1	725.855	1680.41	1456.02	973.466	1093.17	0.53255	0.00650339	1.44648
Plod2	3520.3	4302.33	3528.08	5267.41	5390.16	5248.42	3814.08	3869.68	4066.9	5625.41	6161.09	5703.24	4708.09	0.532224	2.9152e-16	1.44616
Jrk	764.458	599.766	694.79	986.451	1015.61	986.39	714.808	744.238	676.445	1065.29	962.616	1056	855.571	0.530828	7.95786e-15	1.44476
Aplnr	1805.85	2116.99	2087.68	2962.81	2716.69	2376.93	1429.62	1887.39	1647	2113.4	2621.7	3038.91	2233.75	0.52902	2.33333e-05	1.44295
Gm10406	142.87	225.273	156.852	284.188	190.876	260.297	167.671	171.342	165.876	262.313	293.797	190.461	209.318	0.528838	0.00322943	1.44277
Sgpp1	1013.63	1256.33	1073.67	1703.4	1531.81	1411.09	968.962	959.513	924.671	1458.19	1609.83	1209.43	1260.04	0.526856	6.0976e-07	1.44079
Carmil3	653.411	550.668	729.033	795.553	1050.42	880.901	767.757	601.892	710.561	1087.05	903.857	1057.06	815.68	0.524922	6.14981e-06	1.43886
Adgrl3	1226.25	1142.73	1359.76	1720.67	1521.01	2054.98	1502.86	1437.51	1451.71	2184.41	1803.39	2393.46	1649.9	0.52414	2.81092e-05	1.43808
Cntfr	392.047	270.52	336.901	384.388	435.775	504.155	327.4	239.878	237.638	504.008	353.42	421.13	367.272	0.523361	0.00206655	1.4373
Rnf182	945.246	977.147	917.918	1377.75	1685.48	1153.53	735.105	572.017	708.208	1071.02	992.86	699.414	986.307	0.523234	0.0250303	1.43717
Spock2	3383.52	3207.74	3011.13	4845.88	4525.81	3671.56	4252.67	3729.97	3348.11	5832.74	5192.43	6001.63	4250.27	0.522593	9.46708e-05	1.43653
Carnmt1	1405	1618.31	1513.3	2070.51	1925.57	1848.11	1128.69	1245.08	1014.08	1810.99	1976.22	1741.66	1608.13	0.521175	1.15097e-05	1.43512
Lgi2	3097.78	3628.44	3570.05	4339.69	4515.01	5551.18	2419.76	2964.65	2816.36	4026.33	4218.58	3888.57	3753.03	0.520665	2.33091e-05	1.43462
Wnt5b	367.671	351.388	340.215	531.232	559.424	468.535	373.289	335.654	338.811	495.989	453.657	516.36	427.685	0.519233	1.95388e-11	1.43319
Adcy8	947.954	860.66	920.128	1016.68	1130.85	1032.97	906.306	791.686	694.091	1599.08	1310.85	1249.63	1038.41	0.518694	0.00010387	1.43266
Astn2	740.759	876.063	791.995	996.817	1088.84	1204.22	926.603	993.781	903.495	1311.57	1335.91	1556.49	1060.54	0.518482	3.01333e-05	1.43245
Pml	1228.28	1149.47	1365.28	1723.27	1842.74	1900.17	1395.2	1446.3	1577.59	2025.19	1940.79	2247.44	1653.48	0.517756	3.21793e-08	1.43173
Lhfp	1243.85	1237.08	1196.28	1795.82	1836.74	1213.81	999.849	1034.2	1069.37	1739.97	1725.62	1391.42	1373.67	0.517647	1.92144e-05	1.43162
Serpine2	7214.61	7342.56	6691.64	11104.1	10507.8	8862.44	7498.43	8016.15	6209.18	9997.68	10516.2	10499.7	8705.03	0.516837	3.99818e-12	1.43081
Rinl	62.9713	75.0911	82.8446	118.34	117.647	110.969	73.2458	77.3234	90.5848	96.2196	107.149	103.695	93.0067	0.514778	0.000918202	1.42877
Rbp1	2808.65	2327.82	2349.47	4489.99	3945.98	2561.87	2634.2	2332	2185.8	3813.28	3287.93	2808.24	2962.1	0.51428	0.000395426	1.42828
Prtg	283.032	342.723	351.261	462.993	374.55	442.505	339.755	290.841	462.335	479.953	523.649	660.264	417.822	0.512346	0.00384077	1.42637
Inhbb	92.087	104.935	128.133	176.214	130.852	163.028	97.9552	117.742	124.701	150.057	159.86	160.833	133.867	0.512322	0.000406742	1.42634
Mthfd1l	1488.97	1455.61	1385.16	2155.16	2016.81	1948.12	1336.07	1330.31	1279.95	1837.34	1844.87	2005.13	1673.63	0.511788	7.94148e-18	1.42582
Akr1b8	83.2846	83.7555	81.74	126.977	100.84	106.859	71.4808	68.5366	69.4091	113.402	96.7801	107.928	92.5827	0.509973	0.000966351	1.42402
Dctd	1778.77	1884.98	1808.22	2868.65	2691.48	2424.88	1714.66	1738.02	1799.93	2428.4	2533.56	2266.48	2161.5	0.505348	6.0859e-16	1.41947
C1qc	91.4099	94.3452	90.5768	118.34	157.263	123.299	134.137	115.985	128.23	158.075	133.073	238.076	131.901	0.504506	0.0398267	1.41864
Gabra3	156.412	173.287	166.794	213.357	290.516	202.758	129.724	130.044	131.76	161.512	204.794	186.228	178.932	0.502771	0.00493508	1.41693
Trpc3	389.338	457.286	425.269	653.891	639.856	482.235	300.925	323.352	337.634	471.934	502.047	412.665	449.703	0.502635	0.0026576	1.4168
Adamts1	1820.75	2164.16	2198.14	3347.2	3081.63	2387.89	1935.28	1753.83	1327.01	2257.72	2191.38	2600.85	2255.49	0.502604	0.00140999	1.41677
Apitd1	718.414	603.617	684.849	964.856	935.175	978.17	735.988	669.55	650.564	996.56	900.401	990.396	819.045	0.501927	1.01568e-15	1.4161
Ntrk3	492.259	389.896	357.889	731.632	588.236	342.496	382.114	425.279	382.338	668.955	648.945	458.164	489.017	0.501593	0.0118887	1.41578
Ap5b1	219.384	169.436	198.827	266.048	279.712	339.757	222.385	183.643	187.052	273.768	215.163	304.737	238.326	0.500245	0.000336314	1.41445
Fibin	1663.66	1945.63	2191.52	2732.18	3326.53	2127.59	1326.37	1274.08	1496.41	2017.18	1921.78	1871.81	1991.23	0.500126	0.0137886	1.41434
Ndufs5	1417.19	1303.5	1094.65	1982.4	1889.56	1705.63	1343.13	1289.89	1221.13	1747.99	1782.65	1738.48	1543.02	0.49876	2.57906e-12	1.413
Pdgfrb	12340.3	13227.6	13512.5	19814.5	16515	14909.6	10923.3	11486.9	9539.64	18595.6	15082.1	15192.4	14261.6	0.495076	6.59353e-06	1.4094
Anxa5	5943	6661.93	6139.34	9918.07	8379.36	7629.45	5615.22	6153.36	5498.61	8226.78	8253.96	8336.89	7229.66	0.495019	6.92026e-12	1.40934
Unc93b1	253.239	233.938	234.174	337.743	349.34	353.456	264.744	269.753	270.578	351.66	330.089	429.595	306.526	0.493819	3.50939e-07	1.40817
Lrrc17	2545.93	3070.07	2887.41	4585.87	4368.55	2898.89	2969.54	2949.71	2943.42	4199.3	4239.31	4147.81	3483.82	0.49366	4.45312e-06	1.40801
Eif3j1	635.129	753.799	593.168	976.085	873.95	934.33	585.084	622.98	554.097	840.776	918.547	727.983	751.327	0.492994	1.03227e-06	1.40736
Urb1	2076.02	1883.05	1914.26	2891.11	2777.91	2523.51	2028.82	1864.55	1684.64	2765.17	2600.97	2560.64	2297.55	0.492292	1.4794e-15	1.40668
Srm	4388.35	3525.43	3533.6	6317.78	5893.16	4438.75	3769.95	3888.14	3355.17	5647.18	4200.43	5075.78	4502.81	0.491023	2.96771e-05	1.40544
Cadps2	764.458	854.883	793.099	1433.9	1067.23	879.531	725.398	553.565	487.04	883.159	894.352	708.937	837.129	0.489797	0.0227444	1.40425
Ndnf	2470.1	2848.65	2616.79	3316.96	3555.82	2528.99	2080.89	1854	2025.81	3560.13	3807.26	2725.7	2782.59	0.488671	0.000847349	1.40315
Ccdc116	257.302	247.416	208.768	424.122	325.33	242.488	210.913	236.364	196.463	367.696	304.166	239.134	271.68	0.487759	0.00665559	1.40227
Ackr1	136.099	130.928	134.761	146.845	199.28	154.808	121.782	124.772	107.055	182.13	197.881	180.938	151.44	0.487747	0.000304368	1.40225
Zfp109	379.859	322.507	378.876	470.767	496.999	516.485	358.287	354.985	401.161	563.572	536.611	493.082	439.432	0.487565	8.9822e-10	1.40208
Osr2	4431.69	3626.51	5101.02	5703.62	6396.16	5611.46	4553.59	4130.65	4002.2	7320.71	5258.1	5929.68	5172.12	0.48673	3.34946e-06	1.40127
Klf10	2021.17	1977.4	1596.14	3034.5	2392.56	1757.69	1695.24	1557.01	1199.95	2730.8	2330.5	1829.48	2010.2	0.486265	0.00717242	1.40081
Gucy1a2	54.8459	61.6132	51.916	64.7844	80.4322	65.7593	47.6539	47.4484	39.9985	64.1464	82.9544	67.7194	60.7727	0.484865	0.0168722	1.39945
Slc35g1	247.822	246.453	208.768	337.743	316.927	268.517	156.199	201.217	229.403	328.75	317.992	232.785	257.715	0.484265	0.00237262	1.39887
Nalcn	402.881	364.866	334.692	395.617	566.627	483.605	329.165	259.209	318.811	476.516	434.646	459.222	402.155	0.482662	0.00031431	1.39732
Arhgap30	146.256	155.958	135.865	206.446	226.891	180.838	140.314	137.073	150.583	155.784	206.522	230.669	172.767	0.48216	0.000233479	1.39683
Mfsd2a	462.466	357.164	313.705	669.439	533.014	406.886	358.287	361.135	302.341	558.99	464.026	379.863	430.61	0.481607	0.00744814	1.3963
Stk32b	1371.15	1263.07	1265.87	1904.66	1708.28	1526.16	1077.51	1025.41	899.966	1704.46	1514.78	1283.49	1378.73	0.481499	0.00030786	1.39619
Adamts5	257.979	275.334	302.659	462.993	415.366	374.006	172.966	205.61	251.755	245.131	233.309	315.318	292.702	0.481481	0.0481795	1.39618
Klhdc4	1290.57	1181.24	1156.51	1742.27	1805.52	1690.56	1185.17	1224.87	1098.78	1678.12	1576.13	1485.59	1426.28	0.481042	2.41546e-14	1.39575
Pde7b	1364.38	1365.12	1155.41	1910.71	1857.14	1461.77	1178.11	1066.71	1242.31	1757.15	1671.18	1627.38	1471.45	0.480693	1.05527e-07	1.39541
Meis2	2054.35	1802.19	1638.11	2012.64	2048.02	2516.66	1835.56	1581.61	1083.49	2810.99	2723.67	1841.12	1995.7	0.480493	0.00646969	1.39522
Cntn3	322.982	336.947	370.039	399.936	554.622	505.525	518.015	381.345	511.745	706.756	608.332	627.462	486.976	0.4802	0.0132122	1.39494
Sash1	2267.64	2139.13	2351.68	3090.65	3122.45	2904.37	2574.19	2353.97	2528.14	3471.92	3256.82	3958.41	2834.95	0.478892	1.21672e-08	1.39367
Gm3667	146.256	184.84	148.016	195.217	231.693	161.658	123.547	123.893	170.582	230.24	221.212	205.274	178.536	0.478833	0.00268937	1.39362
Phf24	384.599	296.514	256.266	458.674	436.975	269.887	270.921	314.566	269.402	491.407	452.793	389.386	357.616	0.478796	0.00692887	1.39358
Slc25a17	2594.01	2542.51	2440.05	3592.51	3530.61	3394.83	2526.54	2260.83	2495.2	3397.47	3646.54	3140.48	2963.46	0.478665	1.01646e-20	1.39345
Col8a1	2235.82	2465.49	2839.91	2795.23	3612.25	3092.06	1938.81	1659.82	1492.88	3066.43	2664.05	2370.18	2519.41	0.478188	0.00759819	1.39299
Runx1t1	686.59	750.911	815.191	1094.43	1106.84	835.691	778.347	714.363	743.501	1108.82	1082.73	1010.5	893.992	0.478043	1.32454e-08	1.39285
N6amt1	1029.88	1181.24	1035.01	1560.87	1438.18	1433.01	998.084	982.358	1118.78	1405.49	1663.41	1321.59	1263.99	0.477629	2.26545e-10	1.39245
D10Wsu102e	26523.8	28281.4	27435.9	40492.9	34378.2	38137.7	25293.6	22411.5	26699	35911.7	38030.3	31113.9	31225.8	0.477304	8.81053e-10	1.39214
Ift27	549.814	512.16	534.624	729.041	771.909	791.852	650.387	577.289	592.919	847.649	728.443	891.991	681.506	0.477085	2.00499e-08	1.39193
C1qb	130.005	107.823	119.296	150.3	204.082	123.299	148.257	126.529	141.171	198.167	178.87	220.088	153.991	0.47647	0.00929186	1.39133
Gab1	5763.56	6416.44	6518.22	10315.4	8564.23	7723.98	5306.35	5294.89	5985.66	8231.36	7060.63	7168.73	7029.12	0.475828	6.59353e-06	1.39072
Msh4	70.4195	55.837	69.5895	92.4258	80.4322	104.119	60.8911	54.4778	71.762	67.5828	97.6442	88.8817	76.1719	0.47483	0.0121816	1.38975
Abcd2	377.828	431.292	366.726	664.256	533.014	443.875	404.176	347.955	337.634	565.863	521.057	414.781	450.705	0.473498	0.000460505	1.38847
Pcdhga5	293.189	299.402	387.713	493.226	385.354	483.605	349.462	354.985	371.751	483.389	427.733	574.556	408.697	0.472921	0.000164997	1.38792
Ntsr1	91.4099	84.7182	74.0079	133.888	110.444	86.3091	78.5407	79.0807	52.9392	120.275	103.693	86.7654	91.8392	0.472555	0.024166	1.38756
Mon1a	526.792	464.987	498.172	613.293	738.296	602.794	458.007	498.209	463.512	738.829	675.732	671.903	579.21	0.471507	2.09354e-09	1.38656
Shox2	2157.27	2903.52	2981.3	3238.36	3799.52	3324.96	2202.67	2482.26	2429.32	3792.66	3885.03	2963.78	3013.39	0.471269	2.12713e-05	1.38633
Pik3r5	226.832	196.392	194.409	276.414	320.528	279.477	188.851	161.676	171.758	217.64	241.086	250.773	227.153	0.470712	0.000675118	1.38579
Creg1	1102.34	1226.49	1047.16	1844.2	1558.22	1128.87	1066.04	1067.59	962.316	1743.41	1602.06	1087.74	1286.37	0.470524	0.00192816	1.38561
Nt5dc3	1720.54	1647.19	1587.3	2630.25	2270.11	1548.08	1671.42	1629.06	1530.53	2767.46	2325.31	2014.65	1945.16	0.470505	0.000398035	1.38559
Sfrp4	132.714	180.026	182.258	204.719	163.265	204.128	141.197	136.195	168.229	324.168	204.794	198.926	186.718	0.47045	0.0227105	1.38554
Rabl2	981.133	935.751	998.554	1439.08	1444.18	1390.54	1146.34	1135.25	1204.66	1473.08	1592.55	1517.34	1271.54	0.47	7.43473e-10	1.38511
Klhl42	1867.47	1878.24	1907.64	2762.41	2444.18	2644.07	1788.79	1738.02	2019.92	2521.18	2575.91	2527.84	2222.97	0.468098	2.39698e-21	1.38328
Srprb	3227.78	3105.69	2765.91	4520.23	4478.99	3657.86	3054.26	3037.58	2712.84	4143.17	4005.14	3967.93	3556.45	0.468089	1.22346e-11	1.38328
Gas1	2361.76	2663.81	4327.8	5076.51	5594.24	4166.13	2680.09	3484.82	3117.53	3852.22	2848.1	4236.69	3700.81	0.468007	0.0223139	1.3832
Xpnpep1	3775.57	3595.71	3505.98	5335.65	5283.32	4944.28	3787.6	3865.29	3555.16	5210.75	4806.17	4948.8	4384.52	0.466349	9.34711e-28	1.38161
P4ha2	2392.23	2264.29	1822.58	3274.64	3087.64	2557.76	2486.83	2131.67	2231.68	3103.08	2709.84	3684.36	2645.55	0.466272	1.62932e-05	1.38154
Cdh12	180.111	218.534	169.003	191.762	242.497	283.587	165.906	136.195	127.054	194.73	222.076	247.599	198.255	0.465623	0.0104943	1.38091
2003-09-01	2935.95	2242.14	1998.21	3157.16	3439.38	2607.08	2483.3	1995.47	1937.57	3537.22	3329.41	2696.08	2696.58	0.464746	0.000463258	1.38007
Sspn	714.351	955.967	1004.08	1280.14	1381.75	1452.19	948.665	1079.89	1119.96	1147.76	1360.97	1400.94	1153.89	0.464024	6.21897e-05	1.37938
Fermt3	348.035	265.707	346.843	450.036	465.787	328.797	337.99	281.176	324.694	429.552	445.88	501.546	377.17	0.463248	0.000275773	1.37864
Pgap1	1077.28	1141.77	1179.71	1566.06	1426.17	1676.86	1088.98	866.373	1049.37	1282.93	1433.56	1439.04	1269.01	0.462858	6.28377e-07	1.37827
Adamts2	3116.74	3485.96	3523.66	4571.19	4938.78	4107.22	3258.11	3585.87	3922.2	4957.6	4132.16	6068.29	4138.98	0.462178	1.37537e-05	1.37762
Mul1	1228.96	1099.41	1132.21	1666.26	1607.44	1598.77	1230.18	1138.76	1158.78	1691.86	1481.95	1585.06	1384.97	0.460881	4.41202e-19	1.37638
Prl8a1	333.138	295.551	354.575	522.594	471.789	431.546	375.936	369.043	350.575	520.044	416.5	495.198	411.374	0.460112	2.24836e-06	1.37565
Tll1	377.15	405.299	398.759	656.482	690.277	493.195	352.109	256.573	431.748	411.224	378.479	423.246	439.545	0.459443	0.0344391	1.37501
Anpep	817.949	815.412	941.115	1408.85	1260.5	850.761	648.622	796.079	702.326	1029.78	763.872	1171.33	933.883	0.458311	0.00948177	1.37393
Cyp2j6	356.16	423.591	410.909	509.638	499.4	547.994	409.47	357.621	477.629	571.59	637.712	563.975	480.474	0.456655	9.28122e-06	1.37236
Sigmar1	2660.37	2337.45	2327.38	3625.34	3396.16	3183.85	2502.71	2354.85	2230.5	3408.92	2963.89	3209.26	2850.06	0.456222	1.08771e-12	1.37194
Fat4	6421.04	6233.52	6802.1	9632.15	10226.9	7919.89	6930.11	6496.92	7455.01	8986.23	8099.28	10470	7972.77	0.456219	8.89888e-08	1.37194
Aste1	305.377	340.798	308.182	490.634	393.758	409.626	281.511	294.356	334.105	471.934	421.685	360.817	367.732	0.454858	1.26189e-05	1.37065
Dlk1	2523.59	1818.55	2126.35	2461.81	3156.06	2650.92	1687.3	1618.52	1381.12	2557.84	1995.23	2460.12	2203.12	0.453191	0.00684849	1.36906
Myc	3542.64	3296.31	3095.08	4900.29	4625.45	3560.59	3002.19	3000.67	2614.02	4706.74	3682.83	3922.43	3662.44	0.452972	3.28461e-05	1.36886
Eif3k	4496.69	3537.95	4077.06	6004.22	5727.49	5936.15	4709.79	4574.38	4364.54	6331.02	5125.02	6139.18	5085.29	0.452649	2.7704e-08	1.36855
Rgs17	379.182	357.164	378.876	430.169	438.176	405.516	255.919	219.669	211.757	438.716	443.287	310.028	355.705	0.450921	0.0335142	1.36691
Hp1bp3	10052.4	11561.1	10784.2	14015	14336.1	14856.1	10521.8	11215.4	10861.9	14830.4	15807.1	14986.1	12819	0.450899	4.79647e-24	1.36689
Hist4h4	117.14	121.301	151.33	164.121	150.06	157.548	135.902	108.077	108.231	170.675	184.055	183.054	145.958	0.450085	0.00106795	1.36612
Cdc14b	1885.75	1975.47	1797.18	2549.05	2399.76	2486.52	1842.62	1756.47	1756.4	2612.82	2778.11	2214.63	2171.23	0.449711	5.67507e-13	1.36577
Gm8113	804.407	758.613	599.795	982.132	977.191	664.443	689.216	840.892	808.205	1155.78	1267.65	1096.21	887.044	0.449575	0.00652496	1.36564
Zeb2	5152.81	6175.76	6085.21	8050.55	7800.72	6752.66	5161.62	5287.87	5884.48	7558.97	7635.26	8236.37	6648.52	0.448546	2.56069e-10	1.36466
Ebpl	493.613	501.57	575.494	805.918	765.907	739.792	590.379	585.197	582.331	765.175	778.561	676.135	655.006	0.448427	5.38058e-09	1.36455
Ada	170.632	111.674	121.505	215.948	204.082	149.328	171.201	157.283	119.995	208.476	200.473	187.286	168.157	0.447604	0.0117507	1.36377
Cdh2	2981.99	3470.56	2491.97	4234.31	4837.94	3419.48	2629.79	3048.12	2854.01	3467.34	3446.06	4426.09	3442.31	0.44734	0.000266798	1.36352
Pcnx4	880.243	960.781	872.63	1223.99	1230.49	1306.97	881.597	893.612	972.904	1221.07	1257.28	1202.02	1075.3	0.447308	3.42297e-20	1.36349
Plekha2	249.177	260.893	218.71	439.67	322.929	243.857	268.274	244.272	339.987	361.969	349.964	429.595	310.775	0.446808	0.0141471	1.36302
As3mt	262.042	286.887	353.47	469.903	360.144	419.216	277.099	287.327	356.457	457.043	368.974	397.851	358.034	0.445431	0.000351792	1.36172
Gm21244	489.551	445.733	606.423	747.18	686.675	804.182	589.496	469.212	568.214	646.046	738.812	685.658	623.099	0.445265	2.11521e-05	1.36156
Pcdhga4	292.512	230.087	347.947	361.929	441.777	437.026	367.111	299.628	364.692	446.734	403.538	497.314	374.191	0.445139	0.0021107	1.36145
Fbxo32	1477.45	1605.79	1464.69	2340.88	1921.97	1813.86	1733.19	1808.31	1503.47	2333.33	2664.05	1978.67	1887.14	0.445058	7.40595e-05	1.36137
B4galt5	2517.5	2295.09	2071.12	3498.36	3228.09	2450.9	2277.68	2118.48	1922.28	3253.14	2843.78	2700.31	2598.06	0.444909	2.38529e-05	1.36123
Col4a3bp	2694.9	3163.45	2817.82	3801.55	3677.07	3851.03	2800.11	3019.13	2998.71	4092.77	4521.88	3835.67	3439.51	0.44366	7.70725e-12	1.36005
Csrp2	2686.77	2015.91	2047.92	3480.22	3571.43	2392	2484.18	2111.46	2059.92	3295.52	3136.71	2345.84	2635.66	0.442552	0.00184722	1.35901
Lrrc7	304.7	253.192	282.776	339.47	402.161	417.846	379.466	333.896	396.456	522.335	508.96	458.164	383.285	0.442363	0.00744814	1.35883
Trim16	752.27	827.927	885.885	1222.27	1154.86	971.32	648.622	625.616	716.443	946.16	890.031	865.538	875.579	0.441876	0.000819801	1.35837
Mme	9602.78	10665.8	10546.7	13386.2	12936.4	12832.7	7877.89	7684.89	8960.84	11246.2	11865.9	12886.8	10874.4	0.441627	6.54064e-06	1.35813
Bnc2	1031.92	765.352	1107.91	1141.07	1336.14	1700.15	1305.19	920.851	1467	1649.48	1204.57	1928.94	1296.55	0.441473	0.0338345	1.35799
Slc25a40	942.538	1117.7	1063.73	1370.84	1272.51	1417.94	1006.91	876.039	1047.02	1254.29	1517.37	1374.49	1188.45	0.44123	1.60583e-08	1.35776
Parp3	225.478	266.67	302.659	421.531	405.763	363.046	334.46	273.268	398.808	383.733	350.828	513.186	353.286	0.441033	0.0104022	1.35758
Cdc6	1851.22	1920.6	1660.21	2631.98	2627.85	2031.69	1685.54	1702.87	1464.65	2339.05	2482.58	1845.35	2020.3	0.440462	7.65272e-05	1.35704
Naga	872.118	951.154	954.37	1151.44	1289.32	1306.97	932.781	1030.69	1054.08	1303.55	1203.7	1605.16	1137.94	0.440087	1.99619e-06	1.35669
Cnbd2	166.569	163.66	163.48	202.127	190.876	195.908	142.079	137.952	163.523	230.24	218.619	230.669	183.809	0.439785	9.86645e-05	1.3564
Mthfsl	202.456	253.192	252.952	322.195	330.132	338.387	256.801	257.452	243.52	302.405	326.633	362.933	287.421	0.439128	5.82794e-06	1.35578
Six1	4669.35	5604.88	4985.04	7128.02	7542.62	6077.26	5993.8	5592.77	5924.48	7947.28	7864.25	7821.59	6429.28	0.437908	1.12063e-06	1.35464
Colgalt2	229.54	331.171	331.379	451.763	421.369	276.737	280.628	298.749	311.753	375.715	400.082	479.326	349.018	0.437291	0.00763321	1.35406
Per2	631.067	638.274	733.451	846.517	980.793	676.773	712.161	767.962	807.028	1172.96	1037.79	1086.68	840.956	0.437124	0.0026721	1.3539
Pisd-ps1	444.861	396.635	425.269	514.82	669.868	497.305	474.774	470.97	470.57	624.282	643.76	681.426	526.212	0.437083	5.4121e-05	1.35386
Mn1	2318.43	2025.53	2556.03	2640.61	3226.89	2753.67	2490.36	2344.3	2199.92	3549.82	3011.42	3684.36	2733.44	0.437046	2.00793e-05	1.35383
Slc15a3	114.432	124.189	102.727	133.024	153.662	102.749	119.135	94.8969	123.525	166.093	201.337	157.659	132.786	0.436293	0.0271265	1.35312
Entpd4	1292.6	1224.56	1344.29	1826.92	1839.14	1691.93	1399.61	1325.04	1443.47	1887.74	1752.41	1844.29	1572.67	0.434834	8.50353e-17	1.35176
Ubxn11	434.028	383.157	405.386	615.02	605.042	426.066	498.601	391.889	516.451	722.793	575.496	604.184	514.843	0.434431	0.00271369	1.35138
Foxred1	1948.05	1971.62	1770.67	2652.71	2549.82	2301.58	1812.61	1837.31	1796.4	2526.91	2646.76	2361.71	2181.35	0.433743	3.94009e-16	1.35073
Cyp2s1	436.736	328.283	347.947	685.851	594.238	350.716	397.998	328.624	304.694	466.207	445.016	353.41	419.977	0.433115	0.0452828	1.35015
Sergef	574.19	517.936	530.206	768.775	774.31	719.243	576.259	542.142	576.449	766.321	687.83	766.075	649.978	0.432872	1.2223e-12	1.34992
Cyr61	1065.77	1086.9	1036.11	1563.46	1684.27	1183.67	844.533	965.664	857.615	1296.67	1087.91	1090.92	1146.96	0.432643	0.00268937	1.3497
Nolc1	5606.47	5458.55	5119.8	7596.19	6861.95	6584.15	4878.35	4982.09	4336.31	6730.79	6674.37	6555.02	5948.67	0.432248	5.83715e-10	1.34933
Alkbh2	187.56	195.429	212.082	374.886	304.922	226.048	226.797	233.728	216.462	304.695	240.222	260.296	248.594	0.431626	0.00618889	1.34875
Slc1a5	2115.97	1760.79	1796.07	2859.15	2741.9	2464.6	1849.68	1889.15	1612.88	2368.84	2086.82	2357.48	2158.61	0.431491	6.29689e-06	1.34863
Stx3	595.18	725.881	608.632	784.324	765.907	964.47	663.624	639.675	583.507	878.577	979.899	774.54	747.018	0.431054	1.01119e-05	1.34822
Fmnl2	3903.54	4435.19	4446	6116.51	5504.2	5703.25	4323.27	3761.61	4386.89	5738.81	5510.42	5434.48	4938.68	0.429929	6.52954e-14	1.34717
Gm4969	85.993	77.9792	64.0665	107.974	102.041	112.339	104.133	59.7499	92.9377	93.9287	107.149	130.148	94.8699	0.429684	0.0364464	1.34694
Rnf219	1666.37	2000.5	1576.26	2293.37	2310.93	2170.06	1465.8	1595.67	1378.77	2115.69	2327.04	1821.02	1893.46	0.428887	3.51396e-05	1.34619
Adamts7	1147.02	1074.38	1312.26	1522	1779.11	1424.79	1387.26	1296.92	1258.78	1883.16	1536.38	1901.43	1460.29	0.42652	3.2382e-05	1.34399
Cadm4	1311.56	813.487	871.525	1484	1563.03	1160.38	1088.98	992.024	894.084	1369.98	1213.21	1243.28	1167.13	0.426495	0.00274785	1.34396
Eepd1	306.054	324.432	284.986	395.617	489.796	349.346	404.176	372.558	331.752	500.571	476.988	506.837	395.259	0.42611	0.00236337	1.34361
Rpl35a	12259.1	11501.5	12085.4	17382.1	15303.7	15237	11584.3	11770.7	11938.4	16145.4	15763.9	15728.9	13891.7	0.42599	2.78169e-27	1.34349
Arrdc3	2529.68	2818.8	2673.12	3019.82	3188.48	3856.51	2608.61	2962.01	2772.84	3768.6	4174.51	3958.41	3194.28	0.424786	3.31738e-06	1.34237
Prune2	63.6484	93.3825	82.8446	104.519	100.84	116.449	81.1881	86.9888	83.5262	88.2013	122.703	122.741	95.5861	0.424023	0.01671	1.34166
Akap5	157.767	133.816	131.447	195.217	174.07	142.479	163.259	102.805	152.935	223.367	221.212	170.356	164.061	0.423668	0.0228783	1.34133
Eif5a2	673.725	659.454	677.117	859.474	842.738	1012.42	728.928	622.102	690.562	833.903	973.85	912.095	790.531	0.423293	4.31995e-09	1.34099
Rhoj	826.075	945.378	1032.8	1325.06	1092.44	1306.97	806.586	856.708	864.673	1112.25	1114.7	1191.44	1039.59	0.423164	1.37878e-06	1.34087
Pitpnm3	1067.13	925.161	942.22	1276.69	1339.74	1135.72	794.231	645.826	567.037	1017.18	915.09	941.722	963.978	0.422005	0.0289717	1.33979
Itga4	566.741	714.328	669.385	897.48	701.081	713.763	508.308	504.359	594.095	733.102	752.638	957.594	692.74	0.421287	0.00163848	1.33912
Caskin1	337.878	283.036	350.157	457.81	476.591	353.456	407.705	310.172	347.046	515.462	429.462	490.965	396.645	0.421129	0.00107335	1.33897
Pakap	1233.02	1235.15	1527.65	1792.37	1887.16	2456.38	1558.46	1867.18	1531.71	1741.12	1538.11	2575.45	1745.31	0.421118	0.0137661	1.33896
Slc16a6	433.351	366.791	342.424	627.113	498.2	453.465	372.406	322.474	331.752	495.989	450.2	380.921	422.924	0.420787	0.00341792	1.33866
Fosl2	4613.83	4731.7	5563.85	6759.18	6749.1	5834.77	4587.13	4982.09	4509.24	6218.77	5927.78	7306.28	5648.64	0.420712	5.15865e-08	1.33859
Gsto1	978.424	1056.09	892.513	1397.62	1398.56	1186.41	904.541	992.024	957.611	1254.29	1381.71	1112.08	1125.99	0.419909	1.67895e-07	1.33784
Mab21l1	1187.65	1182.2	1219.47	1638.61	1663.87	1241.21	1430.5	1259.14	1327.01	2061.85	1832.77	1725.79	1480.84	0.419157	0.000447309	1.33715
Man2b1	1326.46	1306.39	1302.32	1720.67	1896.76	1723.44	1365.2	1447.18	1516.41	1885.45	1727.35	2092.95	1609.22	0.419035	2.11929e-09	1.33703
Tmem70	1373.18	1519.15	1243.77	1940.08	1837.94	1853.59	1288.42	1408.52	1342.3	1758.3	1946.84	1581.88	1591.16	0.417479	6.55655e-09	1.33559
Edil3	687.267	1072.45	915.709	1011.5	1126.05	1111.06	658.33	595.742	695.268	844.213	961.752	1118.43	899.814	0.417031	0.0151212	1.33518
Tspan18	3390.29	3493.66	3652.9	5180.16	5012.01	4664.8	3979.1	3838.93	4306.9	4994.26	4719.76	5672.55	4408.78	0.416955	2.68428e-08	1.33511
Amer2	297.251	182.914	246.325	292.826	274.91	268.517	210.03	162.555	170.582	296.677	265.281	301.563	247.453	0.41687	0.0223673	1.33503
Ttyh2	1179.53	1088.82	1020.65	1842.47	1423.77	1333	1133.1	1025.41	894.084	1504	1129.39	1235.88	1234.18	0.416619	0.00168063	1.3348
Gm14326	473.3	352.351	503.695	648.708	612.245	701.433	473.891	396.282	585.86	662.083	542.66	548.104	541.718	0.416234	0.00352192	1.33444
Tppp	115.786	91.4571	106.041	126.114	170.468	95.899	102.368	118.621	94.1141	161.512	155.539	129.09	122.251	0.414972	0.0296408	1.33327
Robo1	7140.81	7015.24	7527.82	9418.79	9260.51	9995.42	8576.82	7932.68	8538.5	11064.1	10665.7	11882.6	9084.92	0.414664	8.46389e-07	1.33299
Gm21685	849.773	940.564	872.63	1299.14	1303.72	1093.25	882.479	975.329	1002.31	1248.56	1249.5	1153.35	1072.55	0.414501	2.19019e-09	1.33284
Cx3cl1	373.765	372.567	349.052	440.534	567.827	530.185	330.93	340.926	315.282	432.988	388.849	425.362	405.689	0.414141	0.000477026	1.33251
Rerg	489.551	504.458	514.741	931.168	673.47	713.763	692.746	709.091	771.735	848.795	861.516	869.77	715.067	0.413912	0.0109858	1.33229
Arsj	133.391	143.443	163.48	128.705	250.901	182.208	135.902	126.529	128.23	156.93	224.668	162.95	161.445	0.4125	0.0496274	1.33099
Kcnj14	100.212	99.1588	90.5768	113.157	110.444	119.189	74.1283	101.048	92.9377	142.038	101.965	157.659	108.543	0.411577	0.0253513	1.33014
Zfp783	1587.15	1590.39	1547.54	2340.01	2140.46	1735.77	1633.47	1527.14	1926.99	2216.49	2282.11	2316.21	1903.64	0.410919	8.2771e-06	1.32953
Fbl	5185.99	4233.98	3967.71	6430.93	6554.63	5732.02	4937.47	4578.77	4285.72	5548.67	6121.34	5759.32	5278.05	0.410395	2.64154e-07	1.32905
Mrc1	395.432	468.838	552.298	790.37	768.308	723.353	706.866	761.811	772.912	797.248	820.903	955.478	709.485	0.410144	0.0396635	1.32882
Tcirg1	2101.07	1881.13	2229.07	2917.89	2954.38	2430.36	2148.84	2174.72	2371.67	2804.11	2607.01	3413.48	2502.81	0.408838	8.82134e-06	1.32762
Olfml3	3306.33	3749.74	3515.93	5012.59	5082.84	4557.94	3088.68	3878.47	4888.05	4199.3	4323.13	6587.82	4349.23	0.40862	0.0069331	1.32742
Lrp12	3044.29	3020.01	2899.56	4065.01	3984.4	4249.7	2996.02	2933.9	2872.83	3851.08	3879.85	3557.38	3446.17	0.407902	2.41436e-18	1.32675
Timp3	4333.51	5664.56	5066.78	7604.83	6673.47	5867.65	4076.17	4445.22	4337.48	5389.44	5808.53	5692.66	5413.36	0.40771	0.000423355	1.32658
Ppargc1b	228.863	170.399	219.814	259.138	224.49	272.627	207.383	147.617	152.935	281.786	203.065	259.238	218.946	0.407663	0.0182995	1.32654
Cc2d1a	2059.09	1748.27	2223.55	2563.74	2869.15	2659.14	2375.63	2123.76	2202.27	3016.03	2511.1	3268.52	2468.35	0.407341	2.19181e-05	1.32624
Emid1	656.12	628.647	711.359	915.62	980.793	827.471	637.15	603.65	603.507	772.048	690.422	908.921	744.642	0.407227	5.25165e-05	1.32613
Rrp12	1932.47	1736.72	1631.49	2583.6	2421.37	2086.49	1660.83	1732.75	1492.88	2345.93	1968.44	2105.65	1974.88	0.4065	6.68731e-06	1.32547
Epb41l2	11222.4	12720.2	11507.7	16594.3	16404.6	13734.1	10540.3	11815.5	11541.9	14612.8	15241.1	15310.9	13437.2	0.406364	7.2983e-11	1.32534
Slc16a2	2687.45	2943.96	2652.13	3881.88	3853.54	3008.49	2553.01	2364.51	2349.32	3564.71	3529.88	2768.03	3013.08	0.406293	0.000102041	1.32528
Zfp703	5638.97	5055.17	4759.7	7546.09	7098.44	6258.1	5234.87	3963.7	4166.9	6855.65	5178.6	5257.77	5584.5	0.406097	0.002385	1.3251
Far2	354.129	486.167	456.198	504.455	551.021	447.985	375.936	355.863	350.575	508.589	568.583	563.975	460.29	0.405668	0.000917831	1.3247
Ibtk	3463.42	3698.72	3300.53	4889.93	4624.25	4268.88	3299.59	3365.32	3435.16	4365.39	4705.07	4355.2	3980.96	0.404675	1.41653e-16	1.32379
Samd5	2531.72	2540.58	2588.07	3366.2	3189.68	2982.46	3881.14	2444.47	3506.93	4676.96	4588.41	4342.5	3386.59	0.404321	0.0306788	1.32347
Dpyd	945.246	1247.67	1005.18	1248.18	1384.15	1257.65	1004.26	787.293	790.558	1182.13	1278.88	1294.07	1118.77	0.403114	0.000937235	1.32236
Apex2	956.08	982.923	932.278	1321.6	1310.93	1197.37	1013.97	940.182	858.791	1222.22	1228.76	1241.17	1100.52	0.403094	1.22573e-13	1.32234
Rph3al	116.463	127.077	96.0998	131.296	138.055	164.398	120.9	126.529	109.408	159.221	188.376	141.787	134.968	0.40296	0.00946884	1.32222
Fam102b	1864.08	2123.73	2166.11	2771.91	2590.64	2348.16	1650.24	1612.37	1572.88	2431.84	2349.51	2023.12	2125.38	0.401677	0.000579265	1.32104
Kcnj2	588.409	762.463	537.938	956.218	917.167	760.342	741.283	754.782	957.611	1021.76	1117.29	953.362	839.052	0.401071	0.0143026	1.32049
Sec11c	866.701	1043.57	816.296	1204.13	1228.09	889.121	871.89	789.929	849.38	1175.25	1386.89	1024.26	1012.13	0.400619	0.00120882	1.32007
Ppil1	2731.46	2459.71	2424.59	3418.03	3393.76	3419.48	2628.02	2621.97	2374.03	3467.34	3229.17	3203.97	2947.63	0.399741	3.07991e-17	1.31927
Smdt1	1596.63	1346.83	1550.85	2100.74	1983.19	2056.35	1641.41	1601.82	1587	2028.63	1844.87	2291.88	1802.52	0.399721	9.88819e-09	1.31925
Fgfbp1	430.642	488.092	420.851	532.96	547.419	671.293	381.231	446.367	312.929	540.663	651.537	331.19	479.598	0.39964	0.0473892	1.31918
Timp2	11267.8	12242.7	13033.1	18110.3	17142.9	14049.2	11196	11714.5	11944.3	15706.7	14460	14685.6	13796.1	0.399321	1.66036e-07	1.31889
BC064078	707.58	773.053	598.691	903.527	823.53	927.48	555.962	572.017	521.157	780.066	890.895	593.602	720.63	0.39872	0.00914568	1.31834
Mrps12	787.479	616.132	720.196	1021.87	997.6	912.411	773.934	807.502	745.854	1014.89	861.516	1060.23	859.967	0.397643	6.1815e-06	1.31735
Zfp74	729.925	866.436	732.347	1021.87	1008.4	1095.99	769.522	834.741	841.145	988.542	1174.32	990.396	921.136	0.397043	1.17897e-07	1.31681
Kcne1l	343.972	344.649	343.529	494.953	477.791	439.765	439.475	346.198	357.633	560.136	408.723	484.617	420.12	0.396811	0.000352065	1.31659
Deptor	368.348	421.665	370.039	455.219	385.354	493.195	280.628	252.18	292.93	361.969	456.249	462.396	383.348	0.39672	0.0167694	1.31651
Mt1	325.69	255.117	310.391	483.724	374.55	419.216	312.398	301.385	205.875	405.497	283.427	289.923	330.599	0.396178	0.0457863	1.31602
Igdcc4	4946.29	5445.07	5672.1	7169.48	7745.5	5884.09	6038.81	5867.79	6730.33	7985.08	7295.66	9573.82	6696.17	0.396055	0.00120945	1.31591
Nckipsd	993.321	910.72	912.395	1333.7	1381.75	1131.61	1044.86	994.66	937.611	1369.98	1176.92	1229.53	1118.09	0.395037	4.21901e-08	1.31498
Dynlt1c	1813.98	1974.51	1912.05	2383.2	2492.2	2401.59	1897.33	1810.95	2070.51	2446.73	2957.84	2394.51	2212.95	0.394738	1.09711e-08	1.3147
Cers6	2438.27	2406.77	2201.46	3293.64	3001.2	3042.74	2179.72	1904.09	2144.62	2849.93	2870.57	2396.63	2560.8	0.394695	1.61936e-05	1.31466
Srp54a	2801.88	2947.81	2960.31	3783.41	3705.88	3324.96	2829.23	2647.45	2204.62	3237.1	4109.7	3383.85	3161.35	0.394539	2.21272e-05	1.31452
Dusp7	4984.89	4471.77	4897.77	6296.18	6779.12	5833.4	4633.02	4631.49	3969.26	6323	5348.83	5673.61	5320.2	0.393618	3.89098e-07	1.31368
Nat10	3199.35	3074.88	2936.01	4353.51	4066.03	3622.24	2989.84	2997.16	2834.01	4044.66	3887.62	3715.04	3476.7	0.39361	1.08258e-12	1.31368
Psd3	2195.87	2085.22	2391.45	3146.8	2631.45	2515.29	2464.76	1880.36	2284.62	3319.58	2914.64	2933.09	2563.59	0.393207	3.22299e-05	1.31331
Fam217b	343.295	360.052	326.96	429.305	460.985	442.505	312.398	347.955	343.516	454.752	463.162	421.13	392.168	0.39279	3.13497e-08	1.31293
Adgrl2	14442.8	14927.7	15958.1	21220.8	19852.4	17165.9	13224	12936.7	12029	18216.4	16390.4	16787	16095.9	0.392527	3.14767e-05	1.31269
Cracr2a	291.157	346.574	382.19	469.903	462.185	402.776	321.222	347.955	459.983	461.625	492.542	517.418	412.961	0.392034	0.00251878	1.31224
Tctn3	1039.36	1032.98	1076.98	1344.06	1432.17	1313.82	1015.73	955.12	1103.49	1500.57	1309.99	1252.81	1198.09	0.390292	2.78277e-10	1.31066
Mlxipl	153.704	110.711	140.284	172.758	181.273	141.109	152.669	132.68	111.76	218.785	185.783	153.427	154.579	0.390045	0.023329	1.31043
Ydjc	730.602	504.458	503.695	959.673	855.943	565.804	555.962	566.745	518.804	770.902	611.789	667.67	651.004	0.389795	0.0263044	1.31021
2310030G06Rik	157.767	160.772	162.375	207.31	204.082	213.718	155.316	166.948	124.701	229.094	193.56	173.531	179.098	0.389613	0.00160398	1.31004
9330182L06Rik	390.016	396.635	365.621	524.322	510.204	441.135	420.06	386.617	382.338	529.208	521.921	536.464	450.379	0.3896	1.12959e-07	1.31003
Fhod3	446.893	417.815	315.914	598.608	595.439	345.236	355.639	365.529	434.101	498.28	518.465	500.488	449.367	0.389244	0.0191649	1.30971
Chd7	1341.36	1175.46	1146.57	1758.68	1399.76	1461.77	1362.55	1320.65	1076.43	1886.59	1574.4	1645.37	1429.13	0.389217	0.000102176	1.30968
Ank2	2483.64	2315.31	2455.51	2765.86	2901.56	2807.1	2571.54	2509.5	3092.82	4089.33	3919.59	3715.04	2968.9	0.389109	0.00422156	1.30958
Cndp2	1906.74	1634.68	1609.39	2511.04	2295.32	1997.44	1614.94	1629.94	1543.47	2138.6	2071.27	2007.24	1913.34	0.389084	1.26454e-06	1.30956
Ppih	1293.96	1110	1103.49	1598.88	1617.05	1590.55	1316.66	1117.67	1195.25	1558.99	1602.06	1387.19	1374.31	0.389035	2.82375e-08	1.30952
Tfap2b	15599.9	18919.1	15961.4	23203.2	21942.4	18809.9	16363.8	14226.6	15139.4	24087	22103.9	15831.5	18515.7	0.388945	0.000931725	1.30944
Jph1	335.17	364.866	246.325	367.976	483.794	352.086	345.049	363.771	315.282	495.989	472.667	409.49	379.372	0.388206	0.00839706	1.30876
Bysl	1918.25	1587.5	1601.66	2364.2	2336.14	1952.23	1716.42	1669.48	1555.24	2387.16	1941.65	2174.43	1933.7	0.387671	3.2624e-06	1.30828
Tarbp1	1849.19	1746.35	1799.39	2547.32	2303.72	2328.98	1724.36	1647.52	1676.41	2178.69	2218.17	2081.31	2008.45	0.387028	7.64685e-11	1.3077
Gfra2	1974.45	2299.91	2691.9	4115.11	3800.72	3760.61	3365.78	3106.99	3461.05	2857.95	3218.8	4335.1	3249.03	0.386581	0.0299098	1.30729
Cd300a	132.037	153.07	133.656	189.171	187.275	145.219	126.195	118.621	142.348	163.802	176.278	185.17	154.403	0.385938	0.00281648	1.30671
Spag4	137.453	113.599	136.97	181.396	195.678	156.178	127.96	147.617	149.406	193.585	151.219	184.112	156.265	0.385898	0.00453575	1.30667
Uqcc1	1285.83	1528.78	1230.52	1874.43	1773.11	1597.4	1268.12	1306.59	1294.07	1701.03	1803.39	1581.88	1520.43	0.385533	1.02197e-07	1.30634
Ngf	161.829	207.945	197.723	196.081	225.69	246.597	225.915	170.463	192.934	323.023	251.455	267.703	222.28	0.385397	0.0195736	1.30622
Slc2a10	841.648	950.191	845.015	1240.41	1214.89	785.002	819.823	985.873	811.734	1343.64	1104.33	1170.28	1009.4	0.385154	0.00428686	1.306
Pde4d	924.256	835.629	943.324	1305.19	1096.04	1253.54	755.402	703.819	734.09	1010.31	826.087	904.688	941.031	0.384532	0.0101325	1.30544
Hecw2	715.028	732.62	788.681	1054.69	919.568	908.301	769.522	616.83	645.858	836.194	925.46	922.676	819.619	0.384396	1.16945e-05	1.30531
Palld	8446.95	9639.58	9369.18	12578.5	12385.4	10635.2	7831.12	7787.69	7466.78	10080.2	9257.19	11012.9	9707.55	0.383896	0.000194518	1.30486
Nckap1l	274.907	255.117	236.383	372.295	398.56	243.857	234.74	234.606	230.579	264.604	286.884	346.004	281.545	0.383161	0.0151875	1.3042
Gstk1	176.726	191.579	162.375	246.181	235.294	232.898	161.494	189.794	176.464	234.822	196.153	237.018	203.4	0.382026	0.000481827	1.30317
Uhrf1bp1l	2306.24	2344.19	2510.74	3037.96	2959.19	3108.5	2357.98	2188.78	2488.14	3096.21	3092.64	3179.64	2722.52	0.381414	6.51906e-19	1.30262
Mdn1	6062.85	5747.36	5588.15	8110.15	7447.78	6973.23	5955.85	5368.7	5228.04	7788.06	7314.67	6581.47	6513.86	0.380955	2.51611e-09	1.3022
Adamts3	391.37	238.751	323.646	406.846	380.552	384.966	317.693	242.514	267.049	405.497	277.379	468.745	342.084	0.380674	0.0476688	1.30195
Rab11fip3	3736.97	3454.19	3667.26	4530.59	4876.35	4612.74	3789.37	3807.3	3571.63	5147.75	4543.48	4976.31	4226.16	0.380443	9.24774e-16	1.30174
Mms22l	2537.13	2393.29	2334.01	2993.9	3109.25	3240.02	2392.4	2168.57	2071.69	2777.77	3153.99	2814.59	2665.55	0.379278	1.07358e-08	1.30069
Parm1	2443.01	2397.14	1893.28	2847.06	2800.72	2849.57	2236.2	1969.99	1665.82	2764.02	2819.58	2323.62	2417.5	0.379104	0.000642535	1.30053
Olfml1	545.751	653.678	690.372	728.177	991.597	801.442	695.394	632.646	810.557	878.577	834.728	996.744	771.639	0.378672	0.00244798	1.30014
Pcdhb6	199.748	206.019	216.501	253.091	294.118	238.378	238.269	237.242	214.11	277.204	292.069	348.12	251.239	0.378392	0.00240227	1.29989
Zbtb7c	696.069	509.272	533.519	922.53	864.346	787.742	717.456	764.447	598.801	854.522	722.394	820.039	732.595	0.378353	0.00360906	1.29986
Chst1	941.86	758.613	907.977	1263.73	1188.48	1045.3	944.253	860.223	935.259	1226.8	1036.07	1184.03	1024.38	0.377072	6.68731e-06	1.2987
Nfia	4869.78	6093.93	5134.16	6302.23	7001.2	6016.98	4561.54	4964.51	4401.01	6986.23	7187.65	5483.15	5750.2	0.376518	0.000240023	1.2982
L3mbtl3	2717.92	2760.08	2700.73	3569.19	3677.07	3111.24	2714.51	2903.14	2837.54	3745.69	3915.27	3559.5	3184.32	0.376359	6.15297e-11	1.29806
Mus81	1172.76	1053.2	1173.08	1437.35	1599.04	1387.8	1206.35	1206.42	1179.96	1670.1	1481.95	1501.47	1339.12	0.376272	1.58494e-09	1.29798
Ppm1m	1474.75	1297.73	1487.89	1819.15	1957.98	1848.11	1565.52	1536.8	1674.05	2030.92	1901.9	2164.9	1729.98	0.375915	3.09191e-07	1.29766
Zfp619	255.271	217.572	277.253	320.467	302.521	363.046	297.396	256.573	295.283	363.115	360.333	362.933	305.98	0.375714	0.000702761	1.29748
Crocc	1824.81	1438.28	1830.31	2059.28	2409.37	2489.26	2035	1835.55	1802.28	2248.56	1990.9	2778.61	2061.85	0.37571	0.000838648	1.29748
Nup210	2577.08	1898.46	2167.22	3020.68	2803.12	3083.84	2080	1897.94	1776.4	2507.44	2285.57	2392.4	2374.18	0.375461	0.00219068	1.29725
Borcs5	199.748	201.206	166.794	292.826	270.108	217.828	193.263	220.547	194.11	252.004	253.184	237.018	224.886	0.374615	0.00141242	1.29649
Sema5a	9266.25	9834.05	10342.3	11624.9	11238.9	12786.1	9791.99	8415.95	9217.3	12631.1	12096.6	13346	10882.6	0.374553	4.62119e-09	1.29644
Fam210b	952.694	1024.32	1007.39	1375.16	1248.5	1250.8	1062.51	1027.17	1065.84	1509.73	1348.01	1216.83	1174.08	0.374375	2.79285e-08	1.29628
Prr18	207.196	141.518	170.108	234.088	265.306	178.098	186.203	185.4	168.229	241.695	260.097	193.635	202.631	0.373929	0.0210271	1.29588
Rnft2	1626.42	1423.84	1453.65	2032.5	2172.87	1586.44	1631.7	1412.91	1504.65	2064.14	1876.84	1995.6	1731.8	0.373499	1.3288e-05	1.29549
Zfp948	1203.9	1364.15	1211.74	1623.07	1493.4	1265.87	1020.15	1013.99	882.319	1334.47	1596.01	1351.21	1280.02	0.372025	0.00347822	1.29417
Tusc1	327.044	256.08	265.103	405.119	418.968	334.277	299.161	336.532	270.578	407.788	349.964	360.817	335.952	0.371997	0.00129157	1.29414
Klf9	490.228	460.174	438.524	703.127	639.856	542.514	661.86	492.937	467.041	742.266	699.928	568.208	575.555	0.371992	0.0078659	1.29414
Fech	1341.36	1532.63	1490.1	1868.38	1966.39	1760.43	1374.9	1397.09	1497.59	1786.94	1853.51	1916.25	1648.8	0.371599	1.09071e-12	1.29379
Gcfc2	876.858	963.669	1030.59	1103.06	1152.46	1183.67	876.302	837.377	877.614	1182.13	1259.01	1175.57	1043.19	0.370939	2.43969e-08	1.29319
Cyp2u1	101.567	98.1961	90.5768	155.483	156.063	105.489	126.195	102.805	111.76	138.602	119.247	139.671	120.471	0.370532	0.0304916	1.29283
Ctss	133.391	143.443	138.074	180.533	214.886	160.288	136.784	126.529	144.7	155.784	177.142	171.415	156.914	0.369245	0.00356867	1.29168
Arsk	469.237	602.654	603.109	672.031	678.272	746.642	561.257	518.418	597.624	640.319	860.652	718.46	639.056	0.368344	0.000608837	1.29087
Necab2	435.382	381.232	340.215	481.996	578.632	409.626	397.998	362.014	264.696	444.443	426.869	479.326	416.869	0.366725	0.01487	1.28942
P3h4	2531.04	2595.46	2718.41	3759.22	3893.16	3408.52	2693.33	3092.94	2912.83	3396.32	2999.32	3863.18	3155.31	0.366018	1.40767e-05	1.28879
Gal3st3	232.249	163.66	252.952	291.098	331.333	249.337	264.744	194.187	251.755	315.005	273.922	288.865	259.092	0.3654	0.0208264	1.28824
Car13	424.548	466.913	383.294	494.953	498.2	428.806	369.759	486.786	488.217	630.009	612.653	705.763	499.158	0.365385	0.0215341	1.28823
Nabp1	165.215	213.721	167.898	209.038	238.896	190.428	156.199	151.132	167.052	249.713	241.95	181.996	194.436	0.364135	0.015783	1.28711
Cpq	299.96	423.591	334.692	418.939	469.388	352.086	274.451	329.503	279.989	404.352	415.636	437.001	369.966	0.364128	0.00887809	1.2871
Ahr	1396.2	1801.22	1946.3	2451.44	2327.73	1908.39	2099.42	2091.25	2172.86	2750.28	2670.96	2686.55	2191.88	0.36366	0.00927649	1.28669
Tmem201	4637.53	3897.04	4512.27	5286.41	5818.73	5504.6	4628.6	4249.27	4176.31	5718.19	5293.53	5927.56	4970.84	0.361573	4.90533e-10	1.28483
Ppib	9067.18	8683.61	8851.12	12440.3	12477.8	10894.1	9313.69	9434.33	9197.3	11286.3	11458.1	11500.7	10383.7	0.361156	8.81951e-16	1.28445
Rnf152	434.705	353.313	504.8	470.767	569.028	648.003	524.193	399.797	599.977	671.246	614.381	639.101	535.776	0.359844	0.0300502	1.28329
Slc25a33	536.948	456.323	457.302	641.798	607.443	604.164	403.293	435.823	369.398	553.263	547.845	461.338	506.245	0.358237	0.00455357	1.28186
Rnf225	85.993	116.487	115.982	114.021	138.055	147.958	119.135	89.6248	89.4084	138.602	128.752	123.799	117.318	0.357519	0.03581	1.28122
Myl9	2130.87	2055.38	2134.08	2677.76	2962.79	2789.29	1861.15	2013.92	1931.69	2435.27	2142.99	2538.42	2306.13	0.357448	2.89711e-05	1.28116
Sf3b5	1935.18	1653.93	1712.12	2351.24	2415.37	2174.17	1886.74	1905.85	1748.17	2579.6	2005.59	2374.41	2061.86	0.357308	2.49902e-06	1.28103
Herc1	5685.7	4816.42	5320.83	6701.3	6208.89	7274.63	5565.8	5127.95	5428.03	6730.79	6543.03	7466.06	6072.45	0.3571	8.9619e-09	1.28085
Map1b	6794.8	5716.55	5178.34	7816.46	7168.07	6707.45	5840.25	5241.3	6538.58	7876.26	7032.98	8619.4	6710.87	0.356898	0.00019499	1.28067
Lrrc8d	1956.17	1583.65	1698.87	2337.42	2036.02	2230.34	1899.1	1712.54	1712.88	2632.29	2273.47	2011.48	2007.02	0.355537	4.30106e-05	1.27946
Adamts14	1721.21	1450.8	1275.81	2112.84	2091.24	1460.4	1622	1167.76	1259.95	1891.17	1659.09	1660.18	1614.37	0.3554	0.0140437	1.27934
Map10	271.521	274.371	248.534	344.653	314.526	389.076	272.686	280.297	294.106	336.769	360.333	355.527	311.867	0.355287	3.22867e-05	1.27924
Ppp4r4	338.555	365.828	425.269	418.076	513.806	453.465	313.28	338.29	308.224	408.933	458.841	419.013	396.798	0.355139	0.00149767	1.27911
Zfp983	241.051	266.67	261.789	329.105	319.328	268.517	205.618	205.61	243.52	300.114	341.323	256.064	269.892	0.355025	0.0060695	1.27901
Lonp2	1849.19	1854.17	1857.93	2366.79	2333.73	2231.71	1969.69	1921.66	1991.69	2729.66	2642.44	2309.86	2171.54	0.353716	1.60583e-08	1.27785
Tmem205	395.432	331.171	356.784	501	511.405	464.425	422.708	436.701	457.63	584.191	506.367	496.256	455.339	0.352584	0.00106615	1.27685
Pcdhb8	89.3786	137.667	120.401	130.433	151.261	113.709	104.133	106.32	107.055	153.493	146.898	148.136	125.74	0.352217	0.0382978	1.27652
Il18bp	354.806	334.059	351.261	448.308	445.378	376.746	328.282	337.411	311.753	463.916	464.89	372.456	382.439	0.351334	0.000149201	1.27574
Usp36	3486.44	3225.07	3544.65	4768.13	4530.61	4012.69	3399.31	3453.19	3312.82	4570.43	3959.34	4204.95	3872.3	0.351043	2.29344e-09	1.27548
Ror1	2365.15	2561.76	2377.09	3092.38	3024.01	2831.76	2535.36	2241.5	2135.21	3108.81	3042.52	3025.15	2695.06	0.350353	2.04929e-10	1.27487
Ppp1r12b	1828.2	2019.76	1976.12	2314.1	2679.47	2575.57	1940.57	1789.86	2096.39	2461.62	2432.46	2379.7	2207.82	0.349668	1.78393e-09	1.27427
Zfp595	257.302	279.185	279.463	317.876	272.509	320.577	223.267	209.125	278.813	343.642	356.013	328.016	288.815	0.349381	0.00466424	1.27401
Emc1	2701.67	2775.48	2482.03	3522.55	3606.24	3468.8	2626.26	2626.36	2816.36	3060.7	3199.79	3557.38	3036.97	0.348886	7.58777e-10	1.27358
Ermap	79.2219	97.2333	100.518	125.25	115.246	100.009	84.718	74.6874	88.2319	106.529	106.285	108.986	98.9096	0.348141	0.0313703	1.27292
Rpusd3	266.104	264.744	249.638	367.976	374.55	327.427	285.923	304.9	295.283	353.951	316.264	380.921	315.64	0.347985	0.000250921	1.27278
Tmem150a	476.686	465.95	460.616	690.17	751.501	465.795	566.552	559.716	572.919	720.502	670.548	642.276	586.936	0.346972	0.0124772	1.27189
Pprc1	6695.27	6224.86	6024.46	8426.3	8402.17	7012.96	5947.03	5935.45	5417.44	7788.06	6943.11	7504.15	6860.1	0.346016	2.63195e-06	1.27105
Fbn2	17019.2	17746.5	20008.6	22958.7	23563	24618.6	15526.3	14904.1	15084.1	16745.7	15120.2	24348.3	18970.3	0.344655	0.029201	1.26985
Adpgk	2969.13	3155.75	2728.35	3871.52	3835.54	3219.47	2589.19	2733.56	2648.13	3380.29	3700.11	3349.99	3181.75	0.344355	3.83725e-06	1.26958
Fam110b	733.988	759.575	804.145	1026.19	1019.21	841.171	682.157	709.969	796.44	939.287	889.167	968.175	847.456	0.344273	5.25815e-06	1.26951
Gaa	3650.98	3189.45	3676.09	4509	4936.38	4407.24	4037.34	3823.11	4248.07	4775.47	3891.08	6196.32	4278.38	0.343926	0.00558034	1.26921
Smtnl2	455.018	406.262	364.516	480.269	468.188	530.185	370.641	311.051	319.988	531.499	358.605	467.687	421.992	0.343805	0.0223916	1.2691
Pid1	1075.93	1265	1264.76	1589.38	1799.52	1682.34	1424.32	1504.29	1604.65	1670.1	1815.49	1763.88	1538.3	0.343789	0.00107256	1.26909
Sec23b	2715.21	2942.03	2512.95	3545.87	3527.01	3274.27	2602.43	2727.41	2409.32	3300.1	3238.68	3307.67	3008.58	0.343357	1.86388e-09	1.26871
Lyst	1083.38	987.737	1258.13	1414.89	1435.78	1533.01	1255.77	996.417	1184.66	1384.88	1260.73	1553.31	1279.06	0.343157	0.000230457	1.26853
Dnase1l2	211.936	223.348	172.317	284.188	282.113	226.048	210.913	228.455	227.05	304.695	298.117	217.972	240.596	0.342505	0.0146832	1.26796
Prrx1	29920.1	37795.9	34244.7	42480.5	41943.6	39509	29343.3	28078.9	30330.6	38901.4	39717	37981	35853.8	0.342453	2.05353e-05	1.26791
Noct	15860	17381.7	18162.9	23440.7	19241.3	21230.7	16107.9	15770.5	18305.2	23492.5	22612	18741.3	19195.5	0.342108	1.77713e-05	1.26761
Lrp3	3289.4	2543.47	2842.12	3741.09	4151.26	3092.06	3266.94	3055.15	3123.41	4434.12	3514.33	4030.36	3423.64	0.341543	0.00154093	1.26711
Ubiad1	1028.53	1081.12	1102.39	1327.65	1366.15	1409.72	1059.86	1105.37	1119.96	1394.04	1335.05	1388.25	1226.51	0.34015	2.13072e-15	1.26589
Psph	647.995	620.946	609.736	729.905	764.706	802.812	584.201	569.381	547.038	761.739	719.802	765.017	676.94	0.33899	1.19603e-07	1.26487
Zfp786	171.986	206.982	154.643	218.539	220.888	209.608	180.908	201.217	156.465	217.64	280.835	207.391	202.258	0.338591	0.0189255	1.26452
Arsb	1606.78	1763.68	1910.95	1919.35	2363.75	2157.73	1554.05	1599.19	1874.05	1983.96	2013.37	2592.38	1944.94	0.338499	0.000815572	1.26444
Zfp182	436.736	440.92	558.925	591.698	452.581	608.274	471.244	429.672	570.567	687.283	707.704	620.055	547.972	0.33833	0.0206292	1.26429
2700060E02Rik	4674.77	5150.48	4475.82	5935.98	5884.76	5793.67	4400.92	4494.42	4368.07	5550.96	6740.91	4930.82	5200.13	0.337933	2.68044e-05	1.26394
Sulf2	8104.33	7390.7	7951.98	9431.75	11501.8	9473.45	9136.31	9704.08	10711.4	12496	10670	13362.9	9994.56	0.336884	0.0115063	1.26303
[truncated: 2,778 more rows]
[truncated: 1 more columns]

## Sheet: BMP pathway
BMP4 targets	DE Genes	Expression in DUHi	Activity in DUHi
[truncated: 18 more rows]

[truncated: 1 more sheets: Wnt pathway]
