# Supplementary material for: Developmental variability channels mouse molar evolution
Source: eLife journal article supplement (doi:10.7554/elife.50103), 2020-02-12
Supplement: supp [file elife_poa_e50103_Figure_2_figure_supplement_1.pdf › elife_poa_e50103_Figure_2_figure_supplement_1.pdf]

# DUHi lower molars

13.9 cdpc

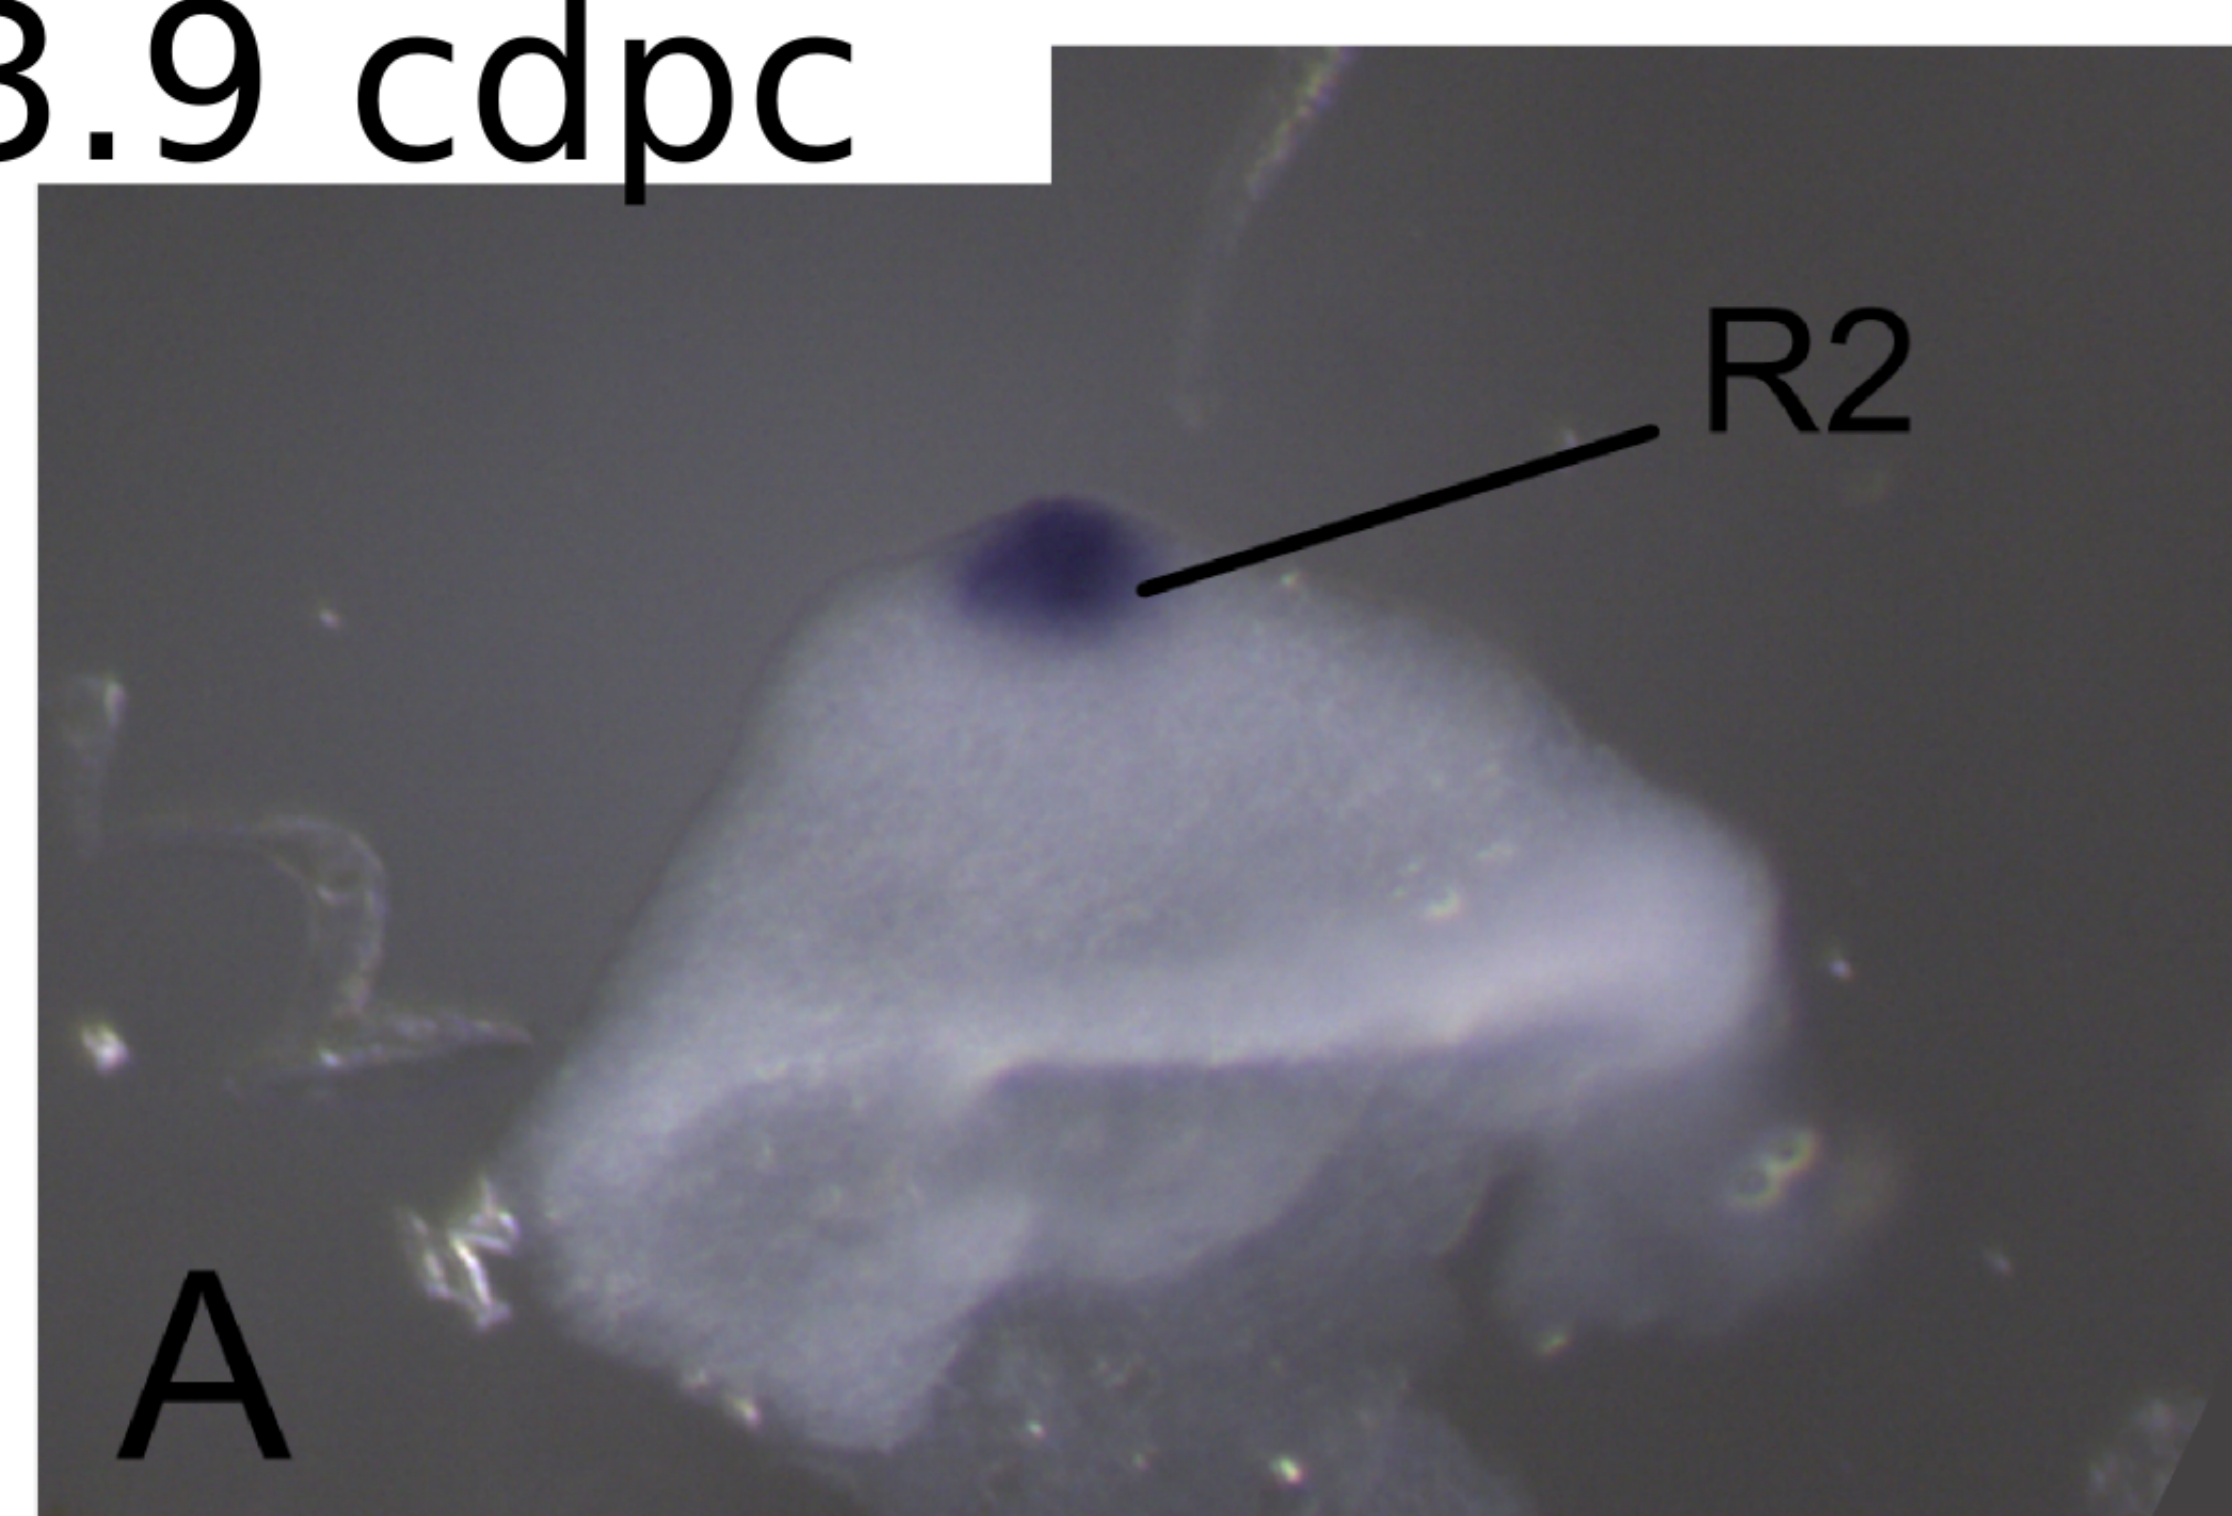

157mg

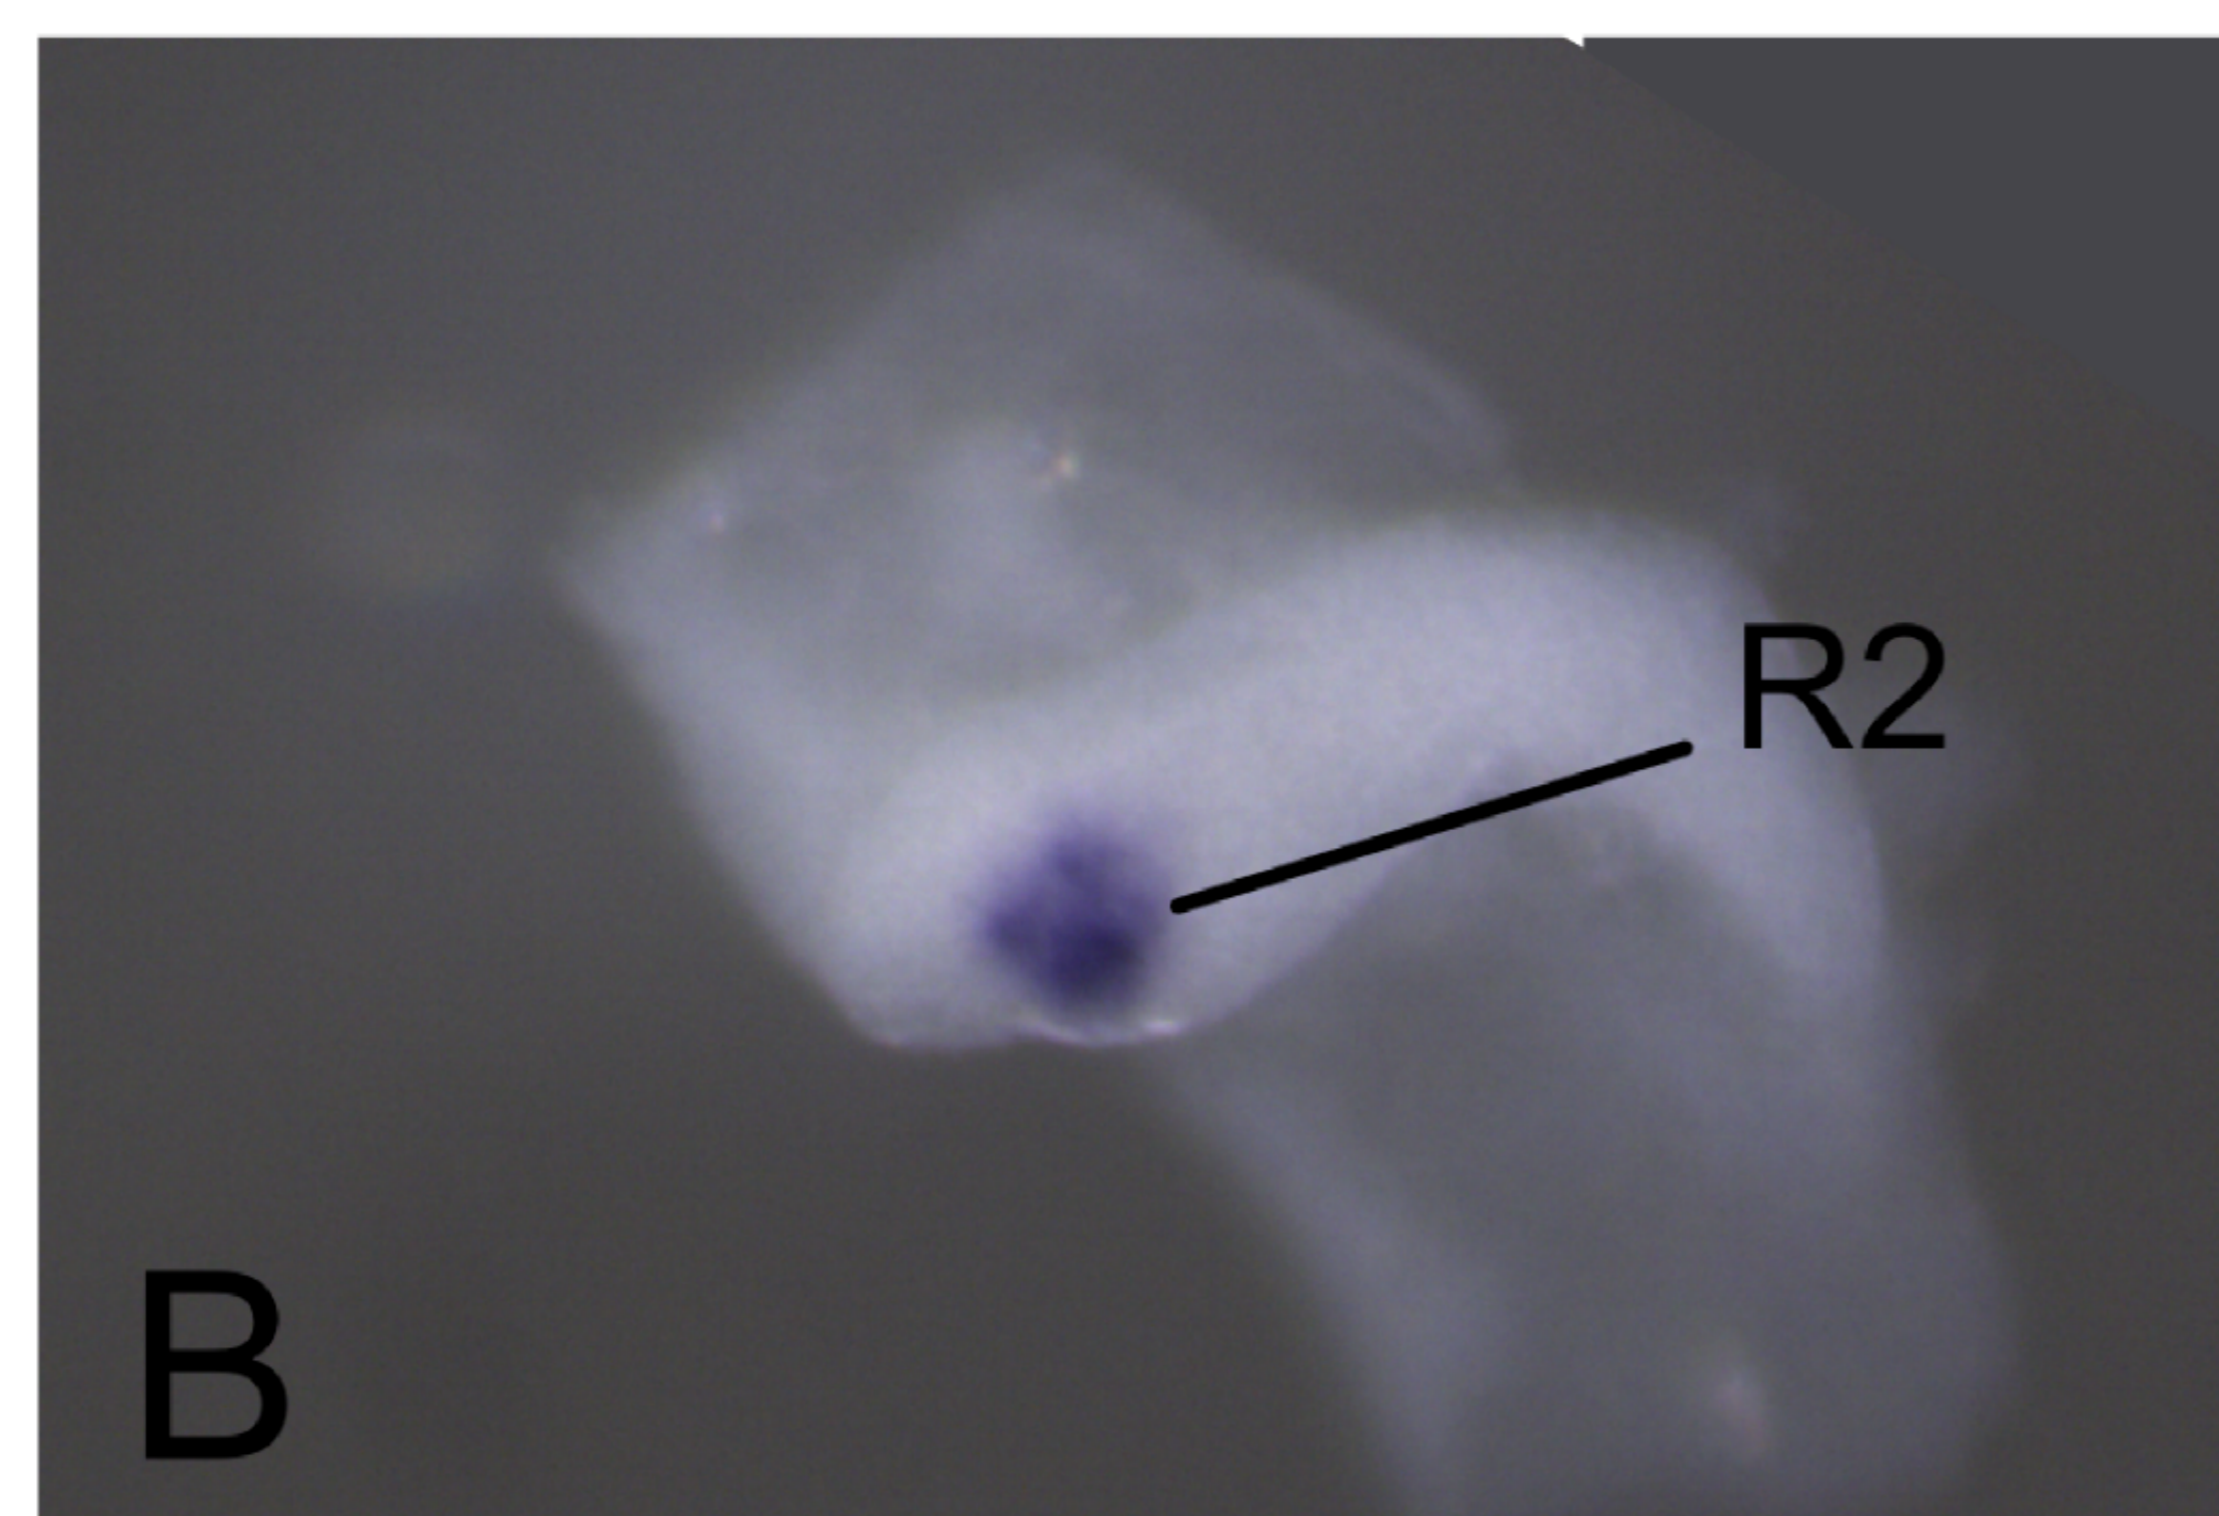

B

# FVB lower molars

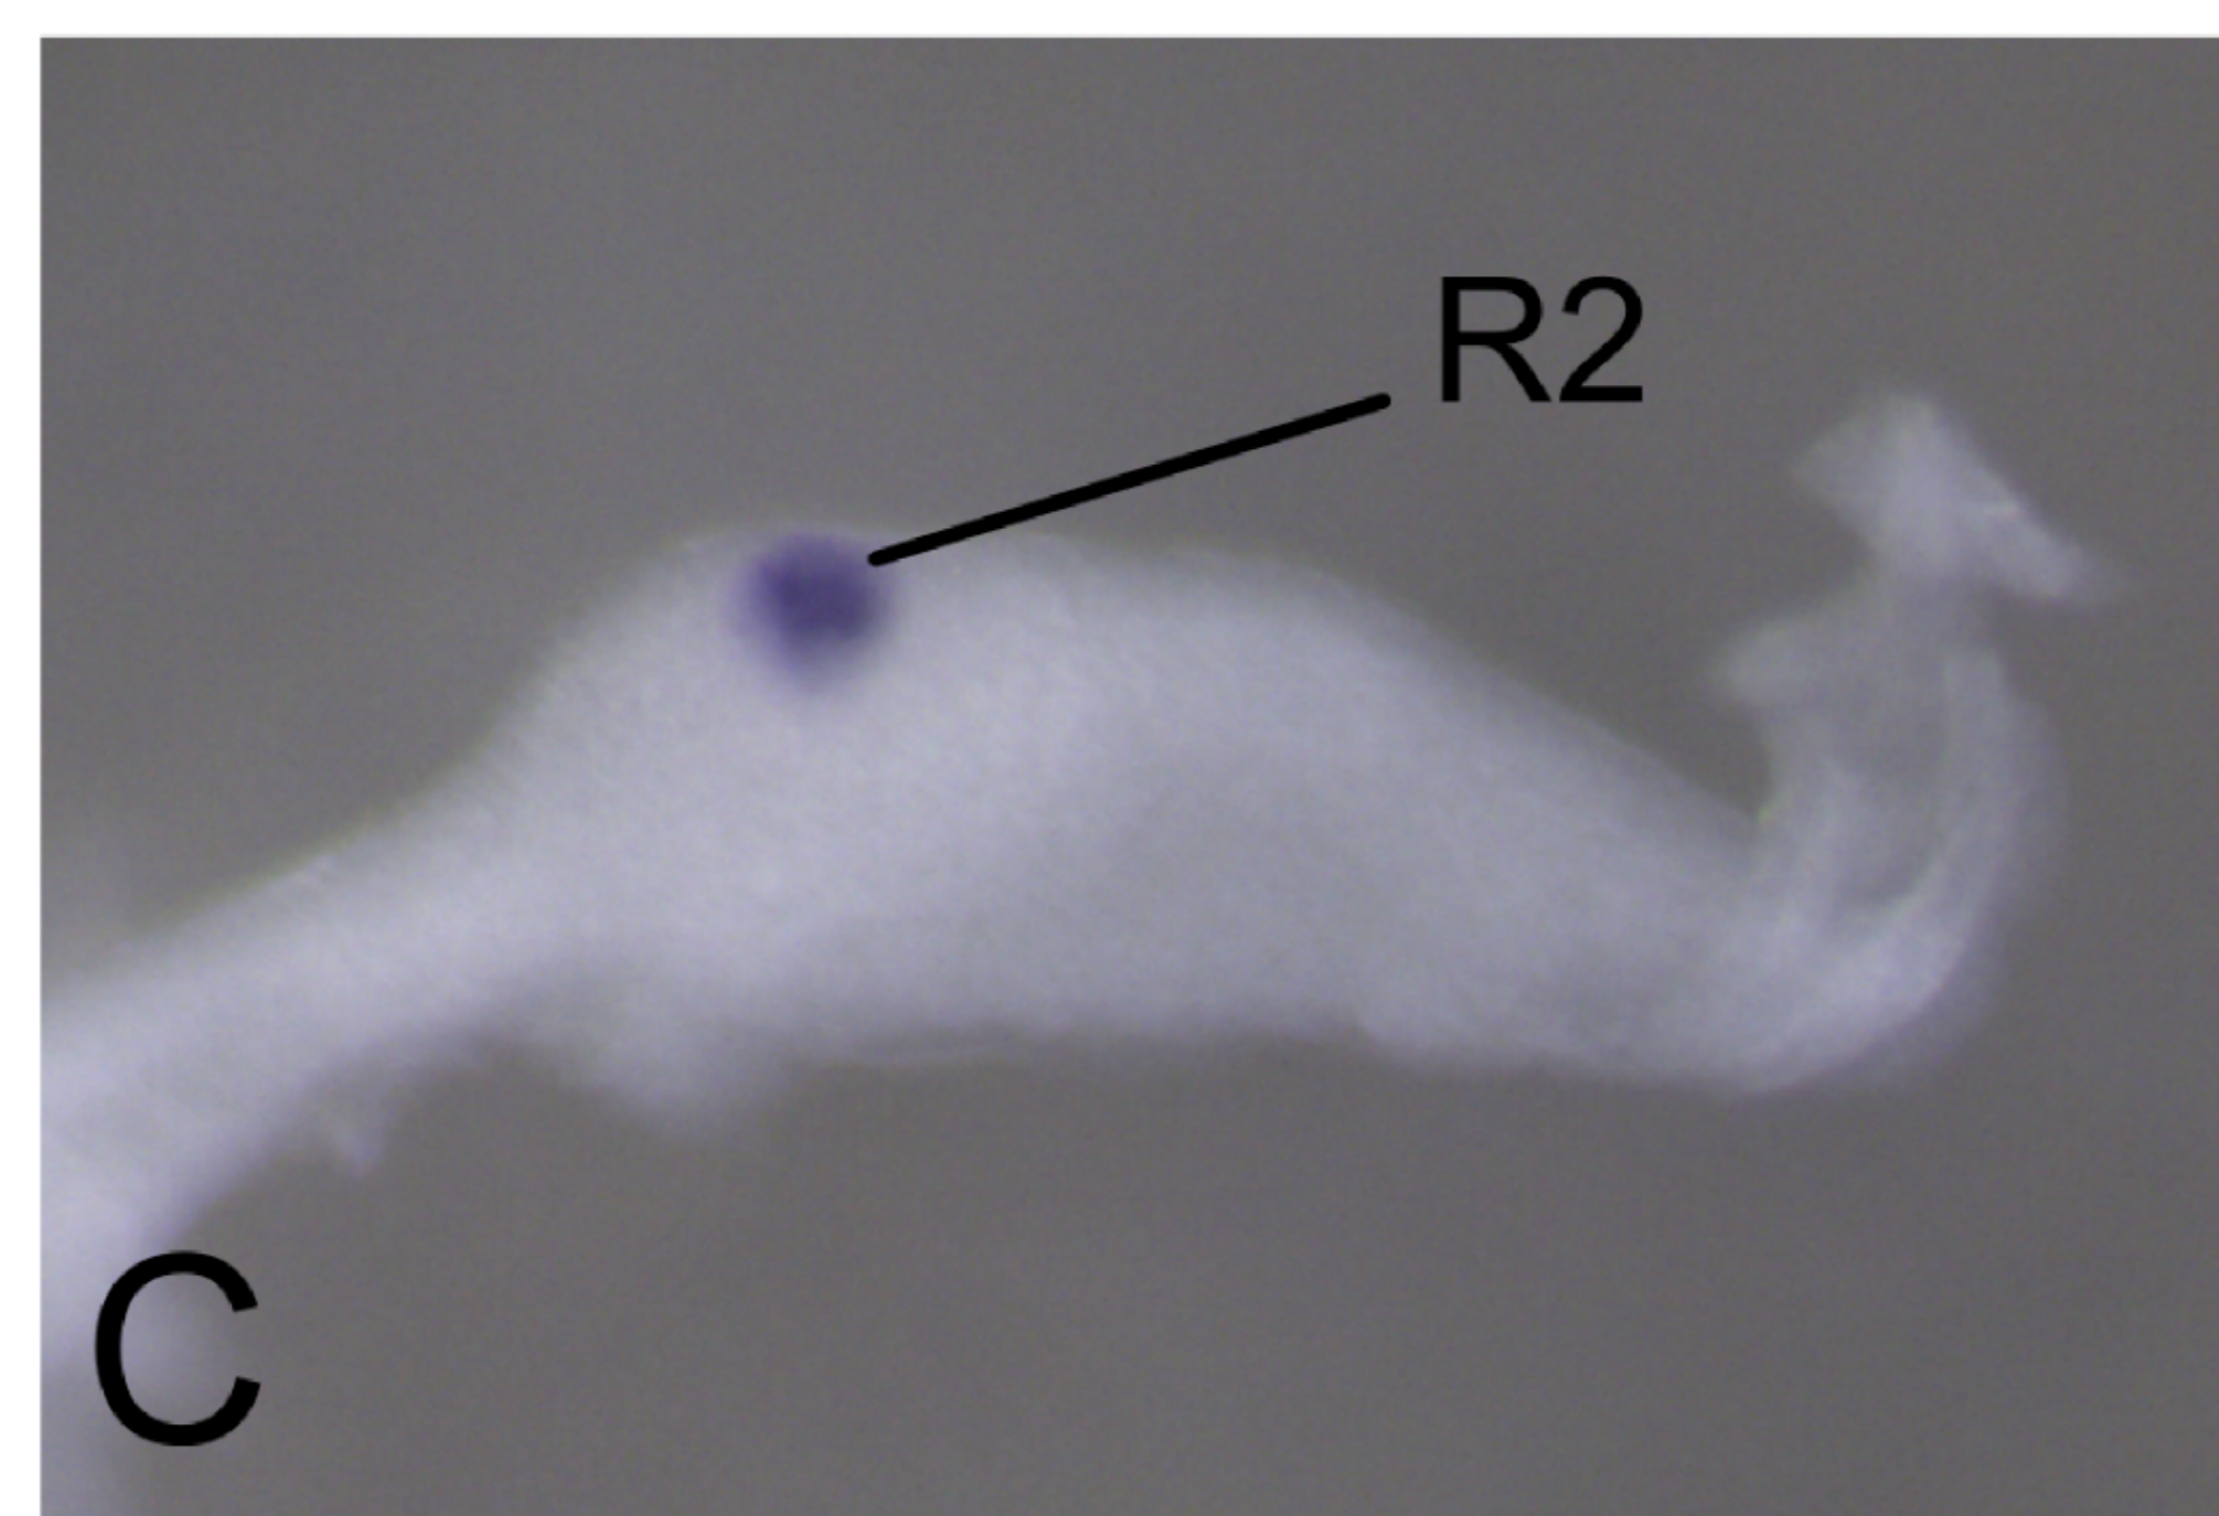

152mg

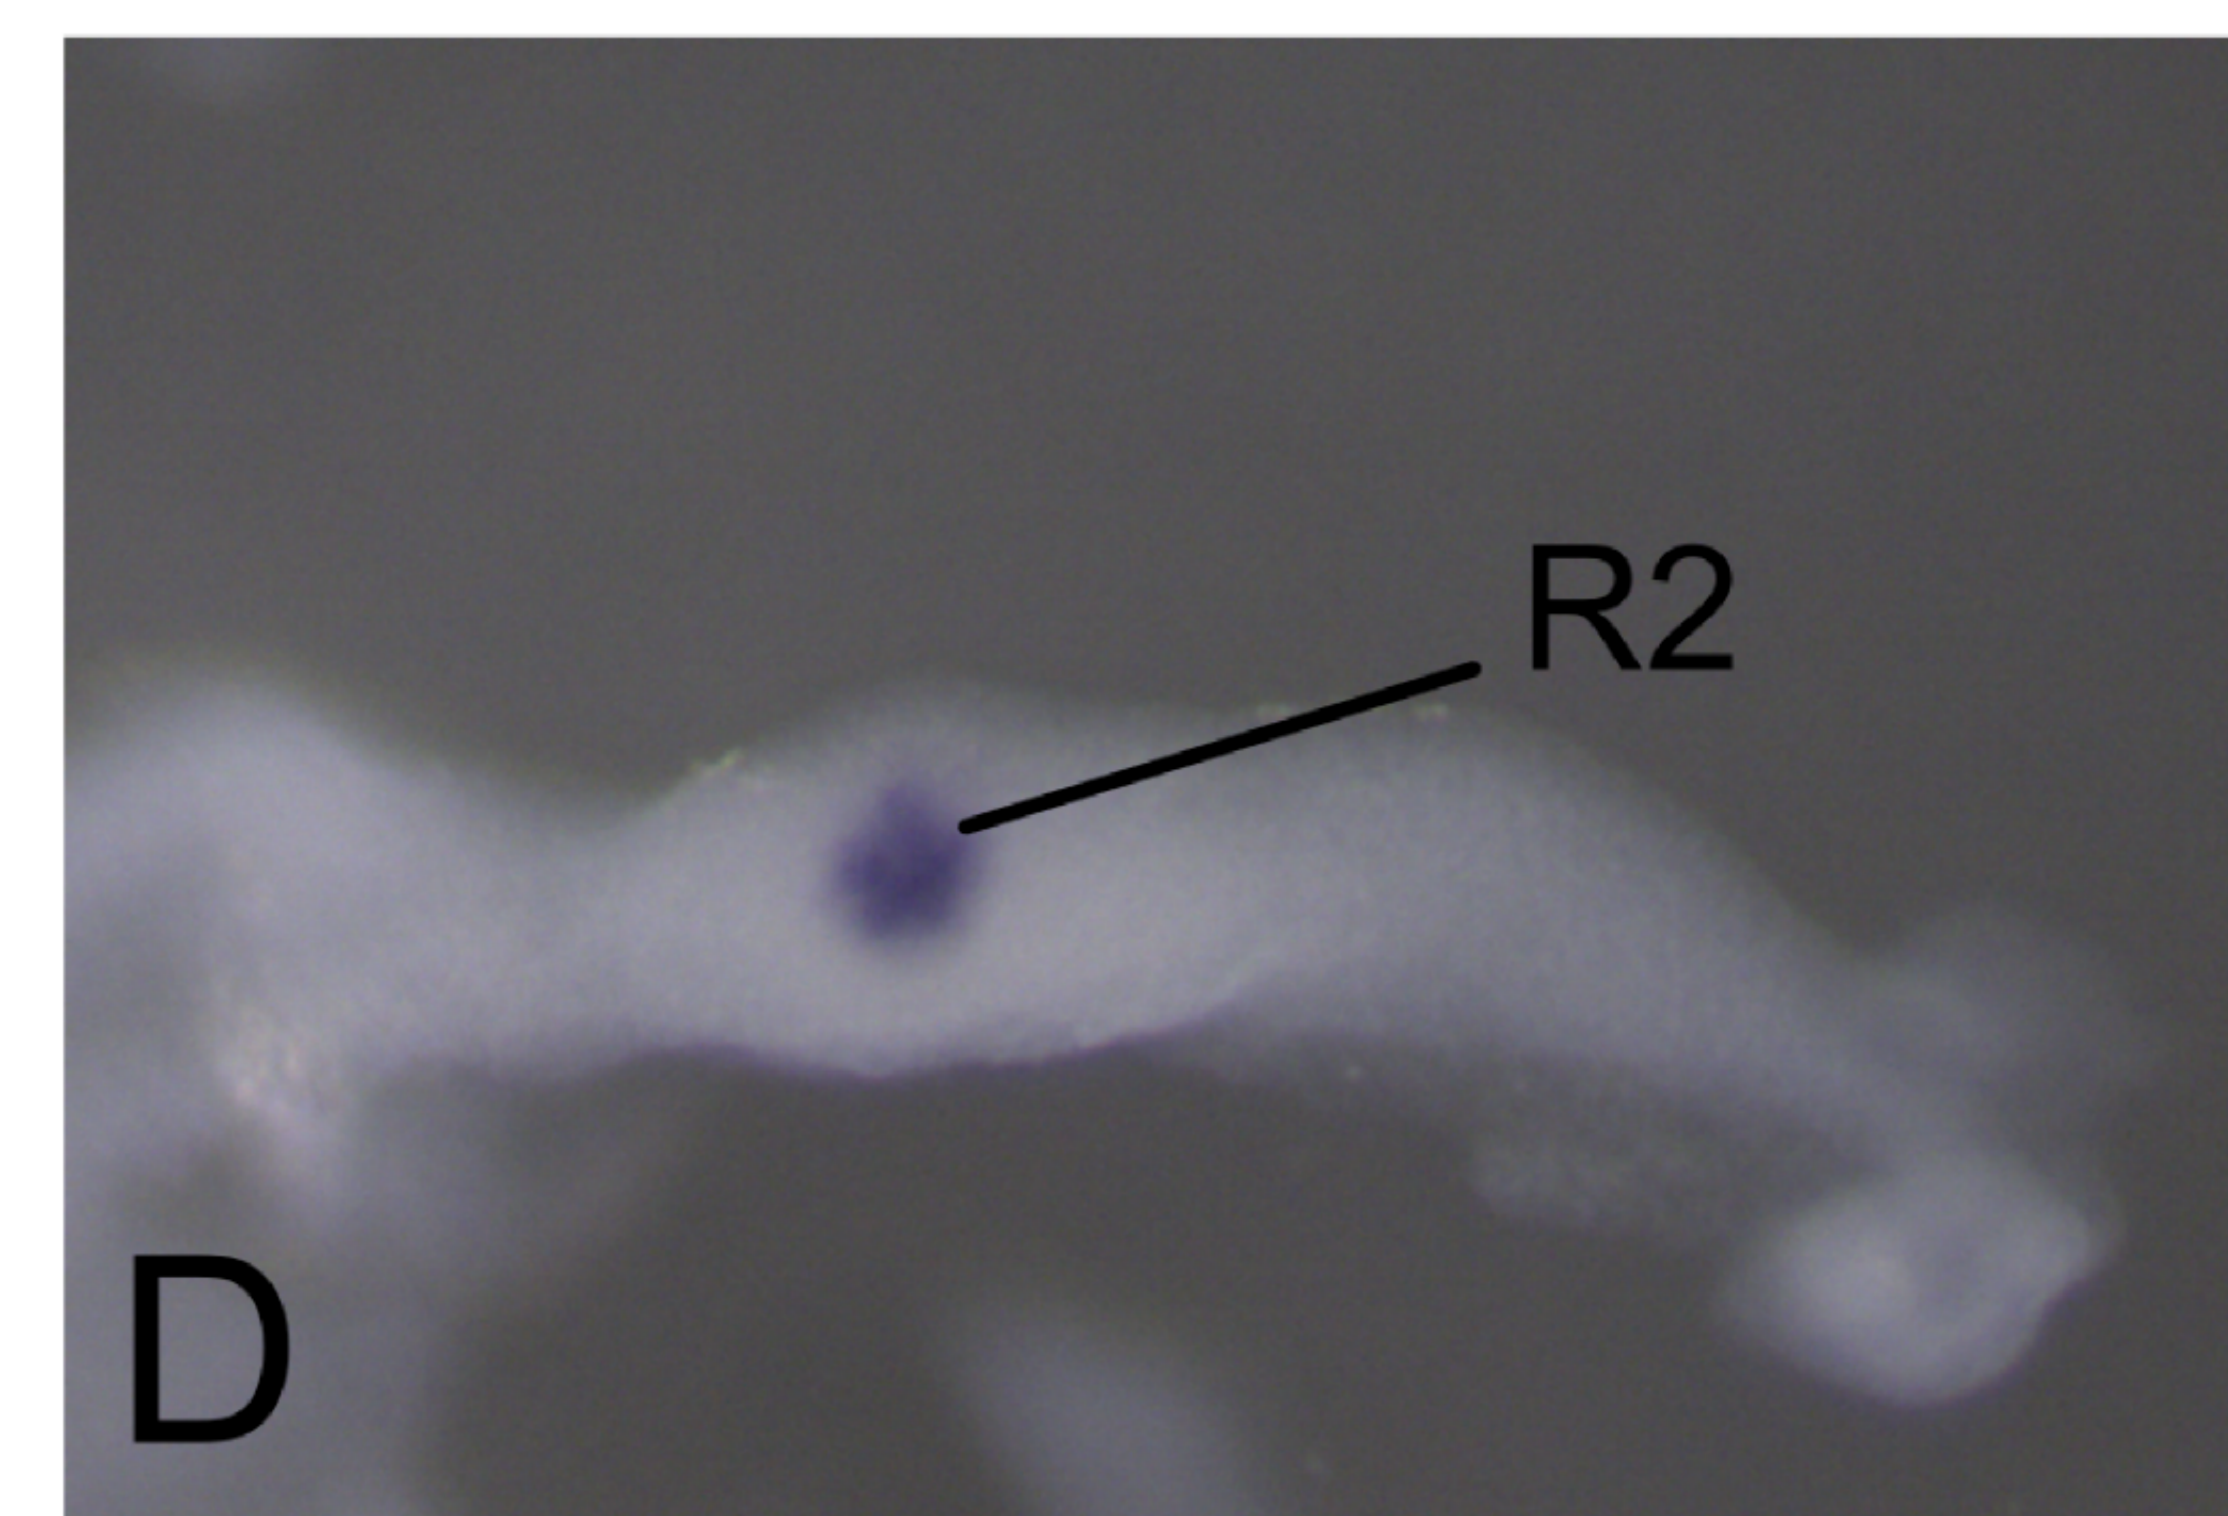

D

14.25 cdpc

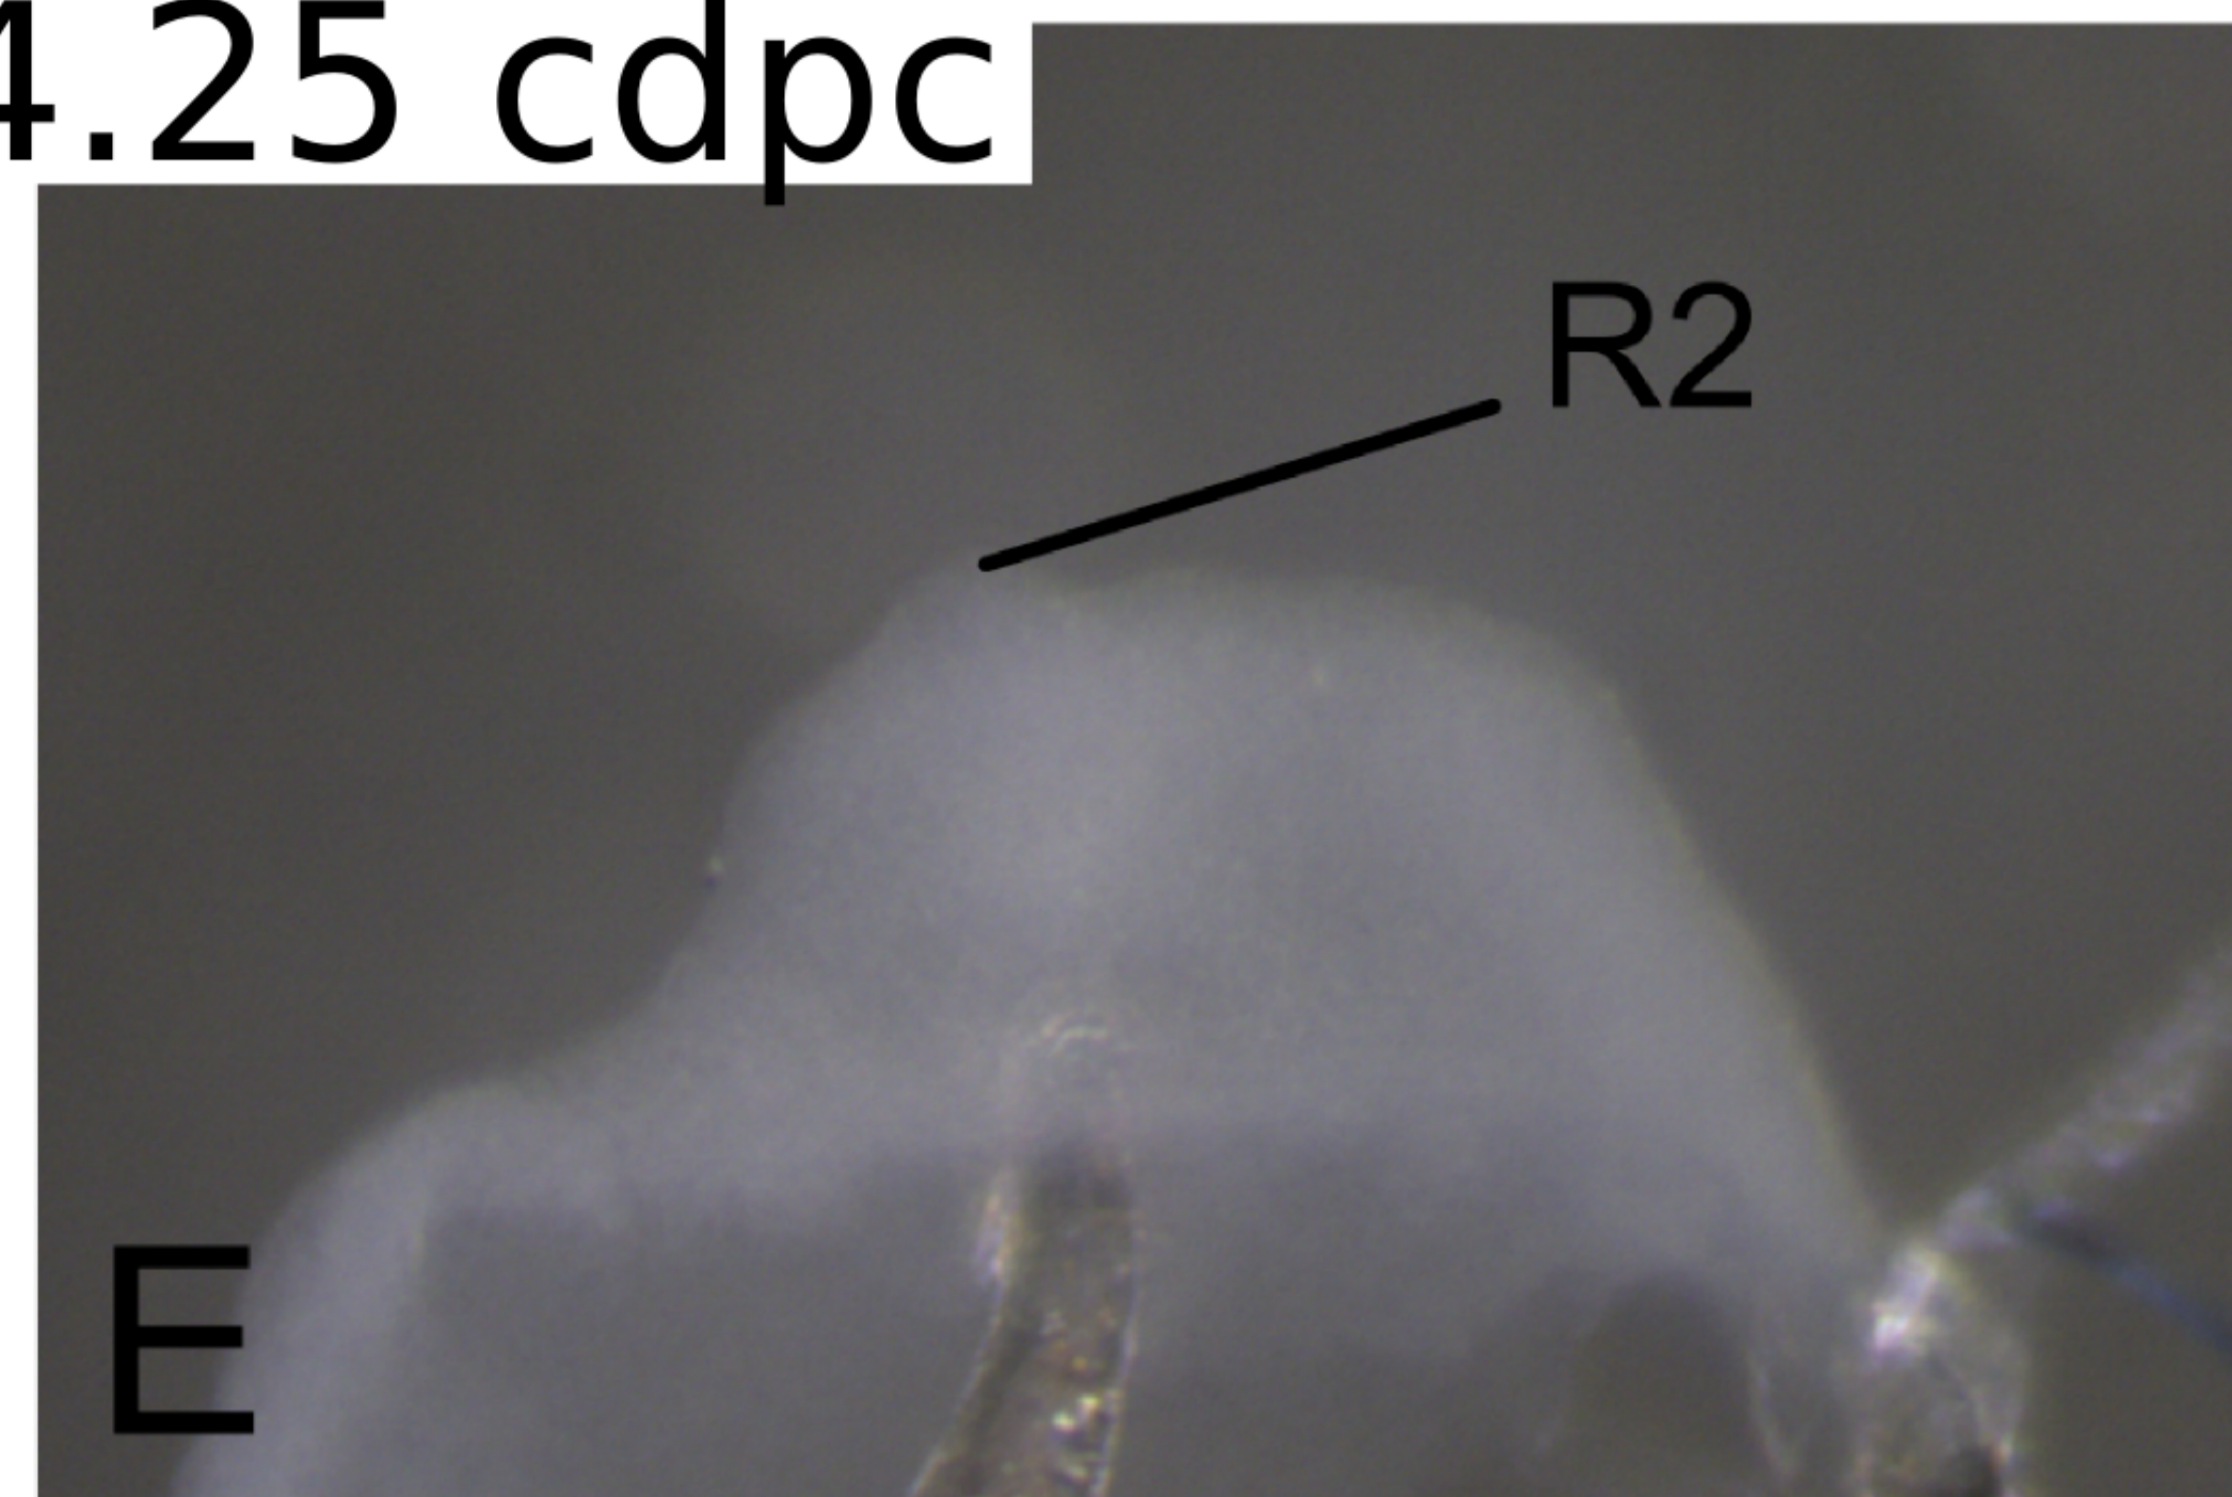

169mg

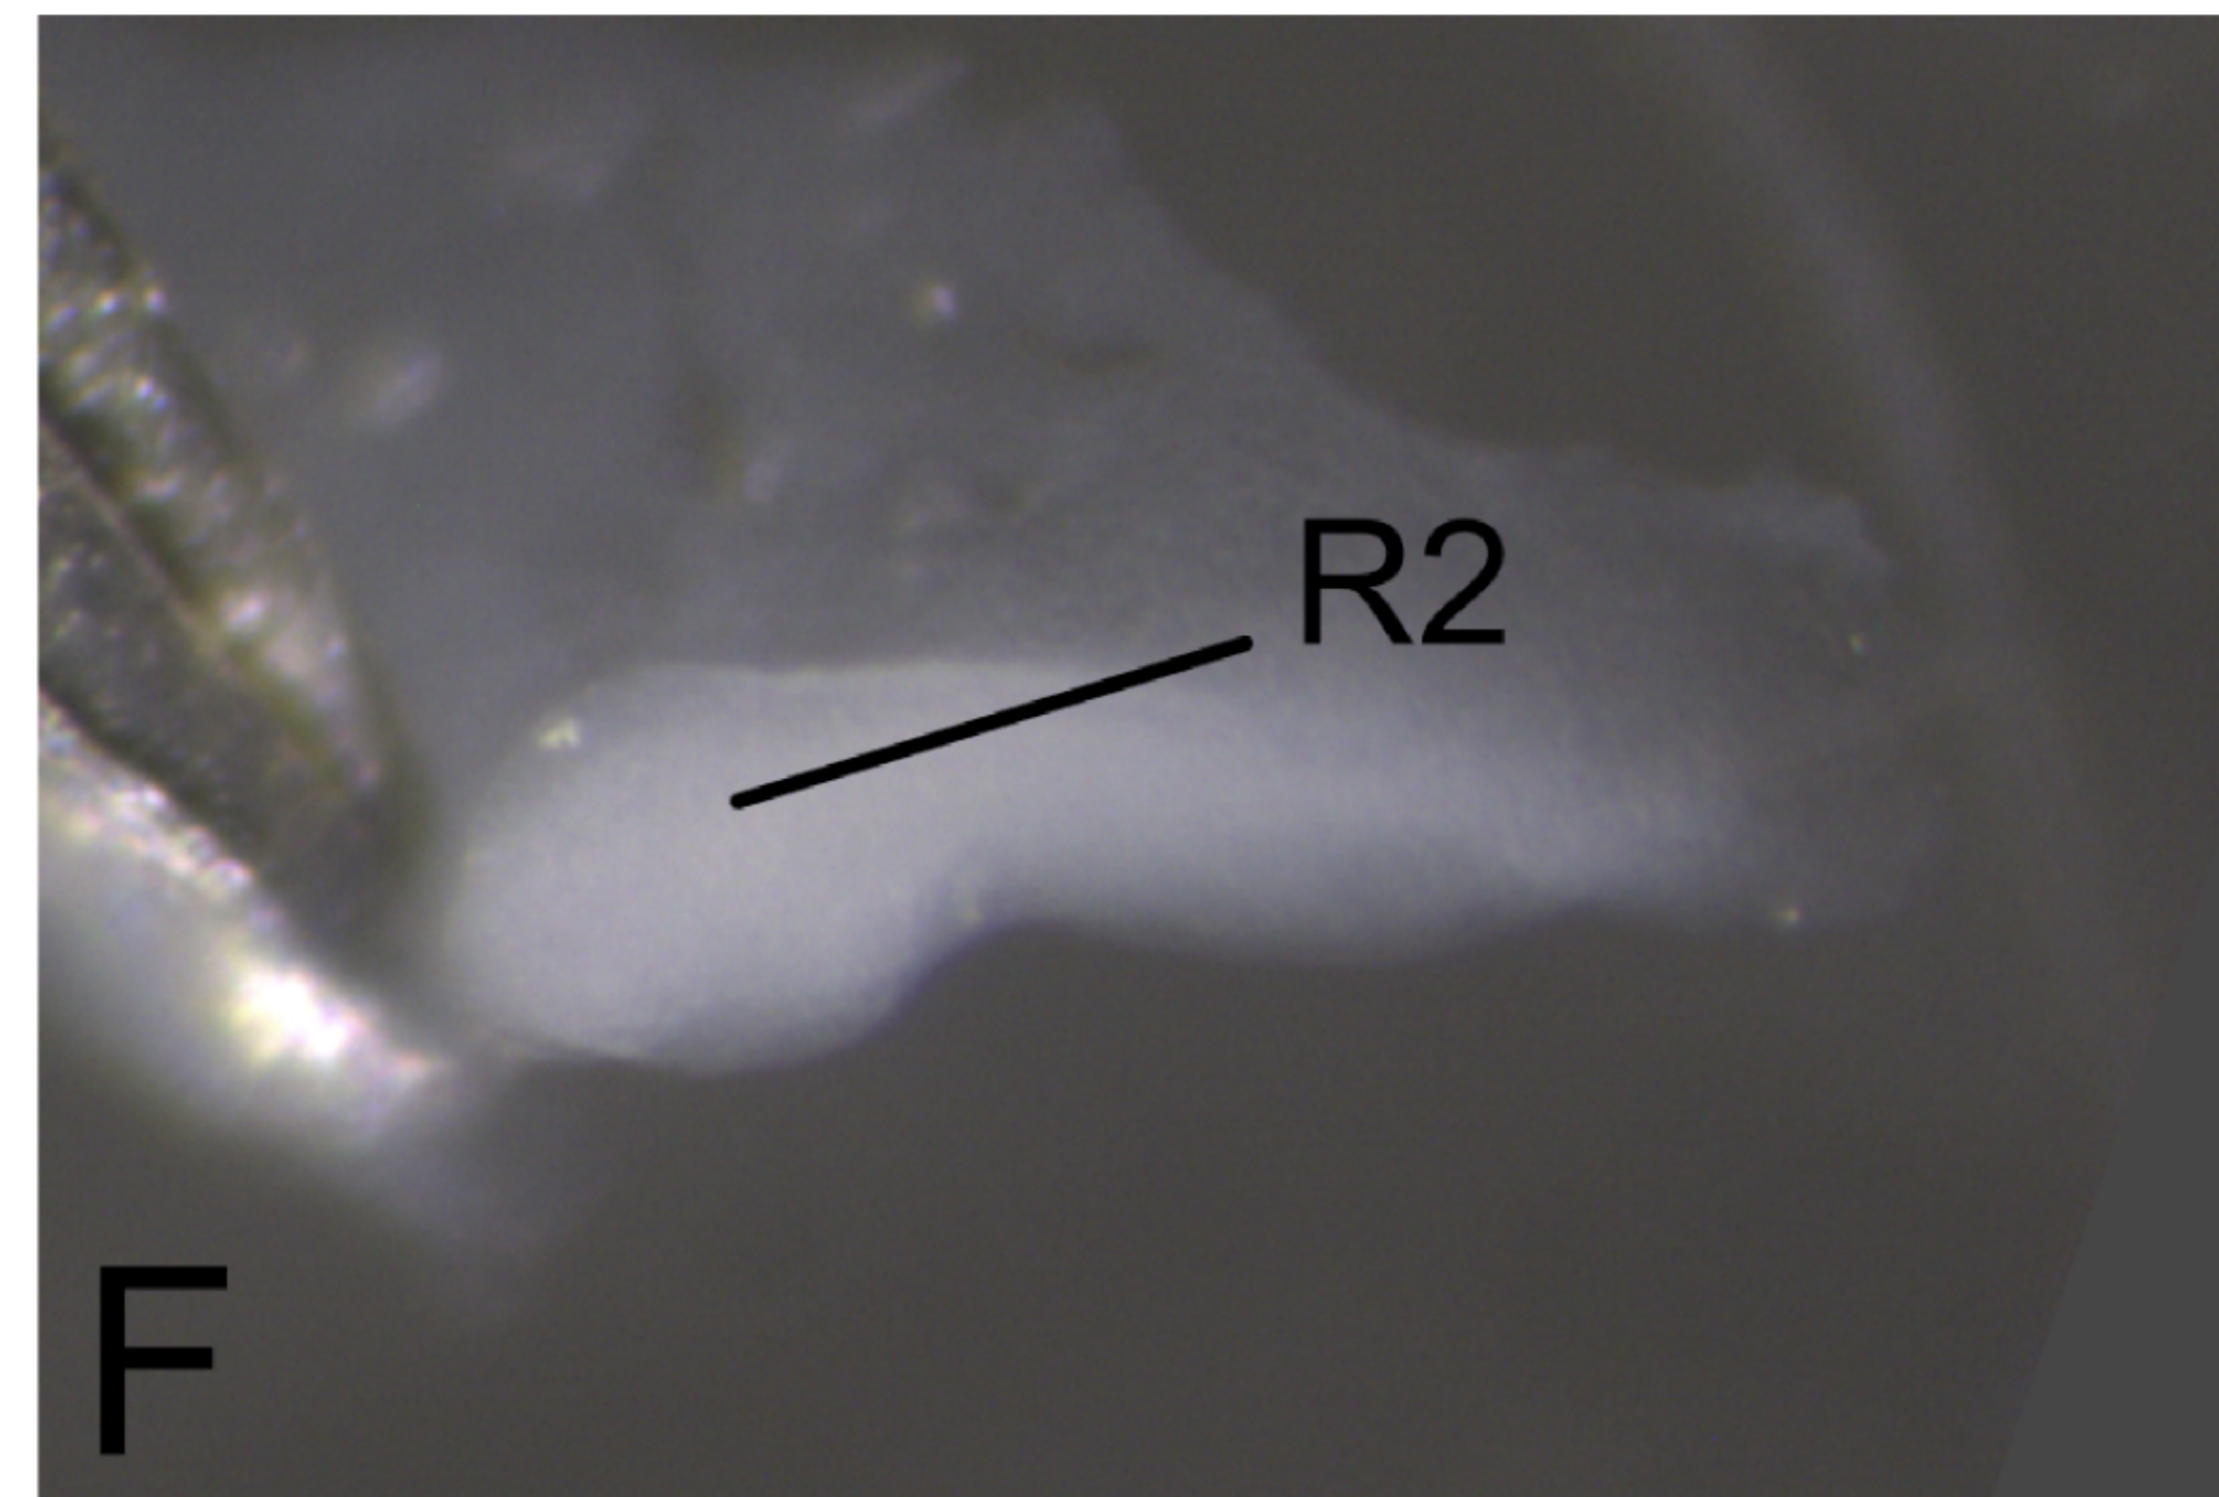

F

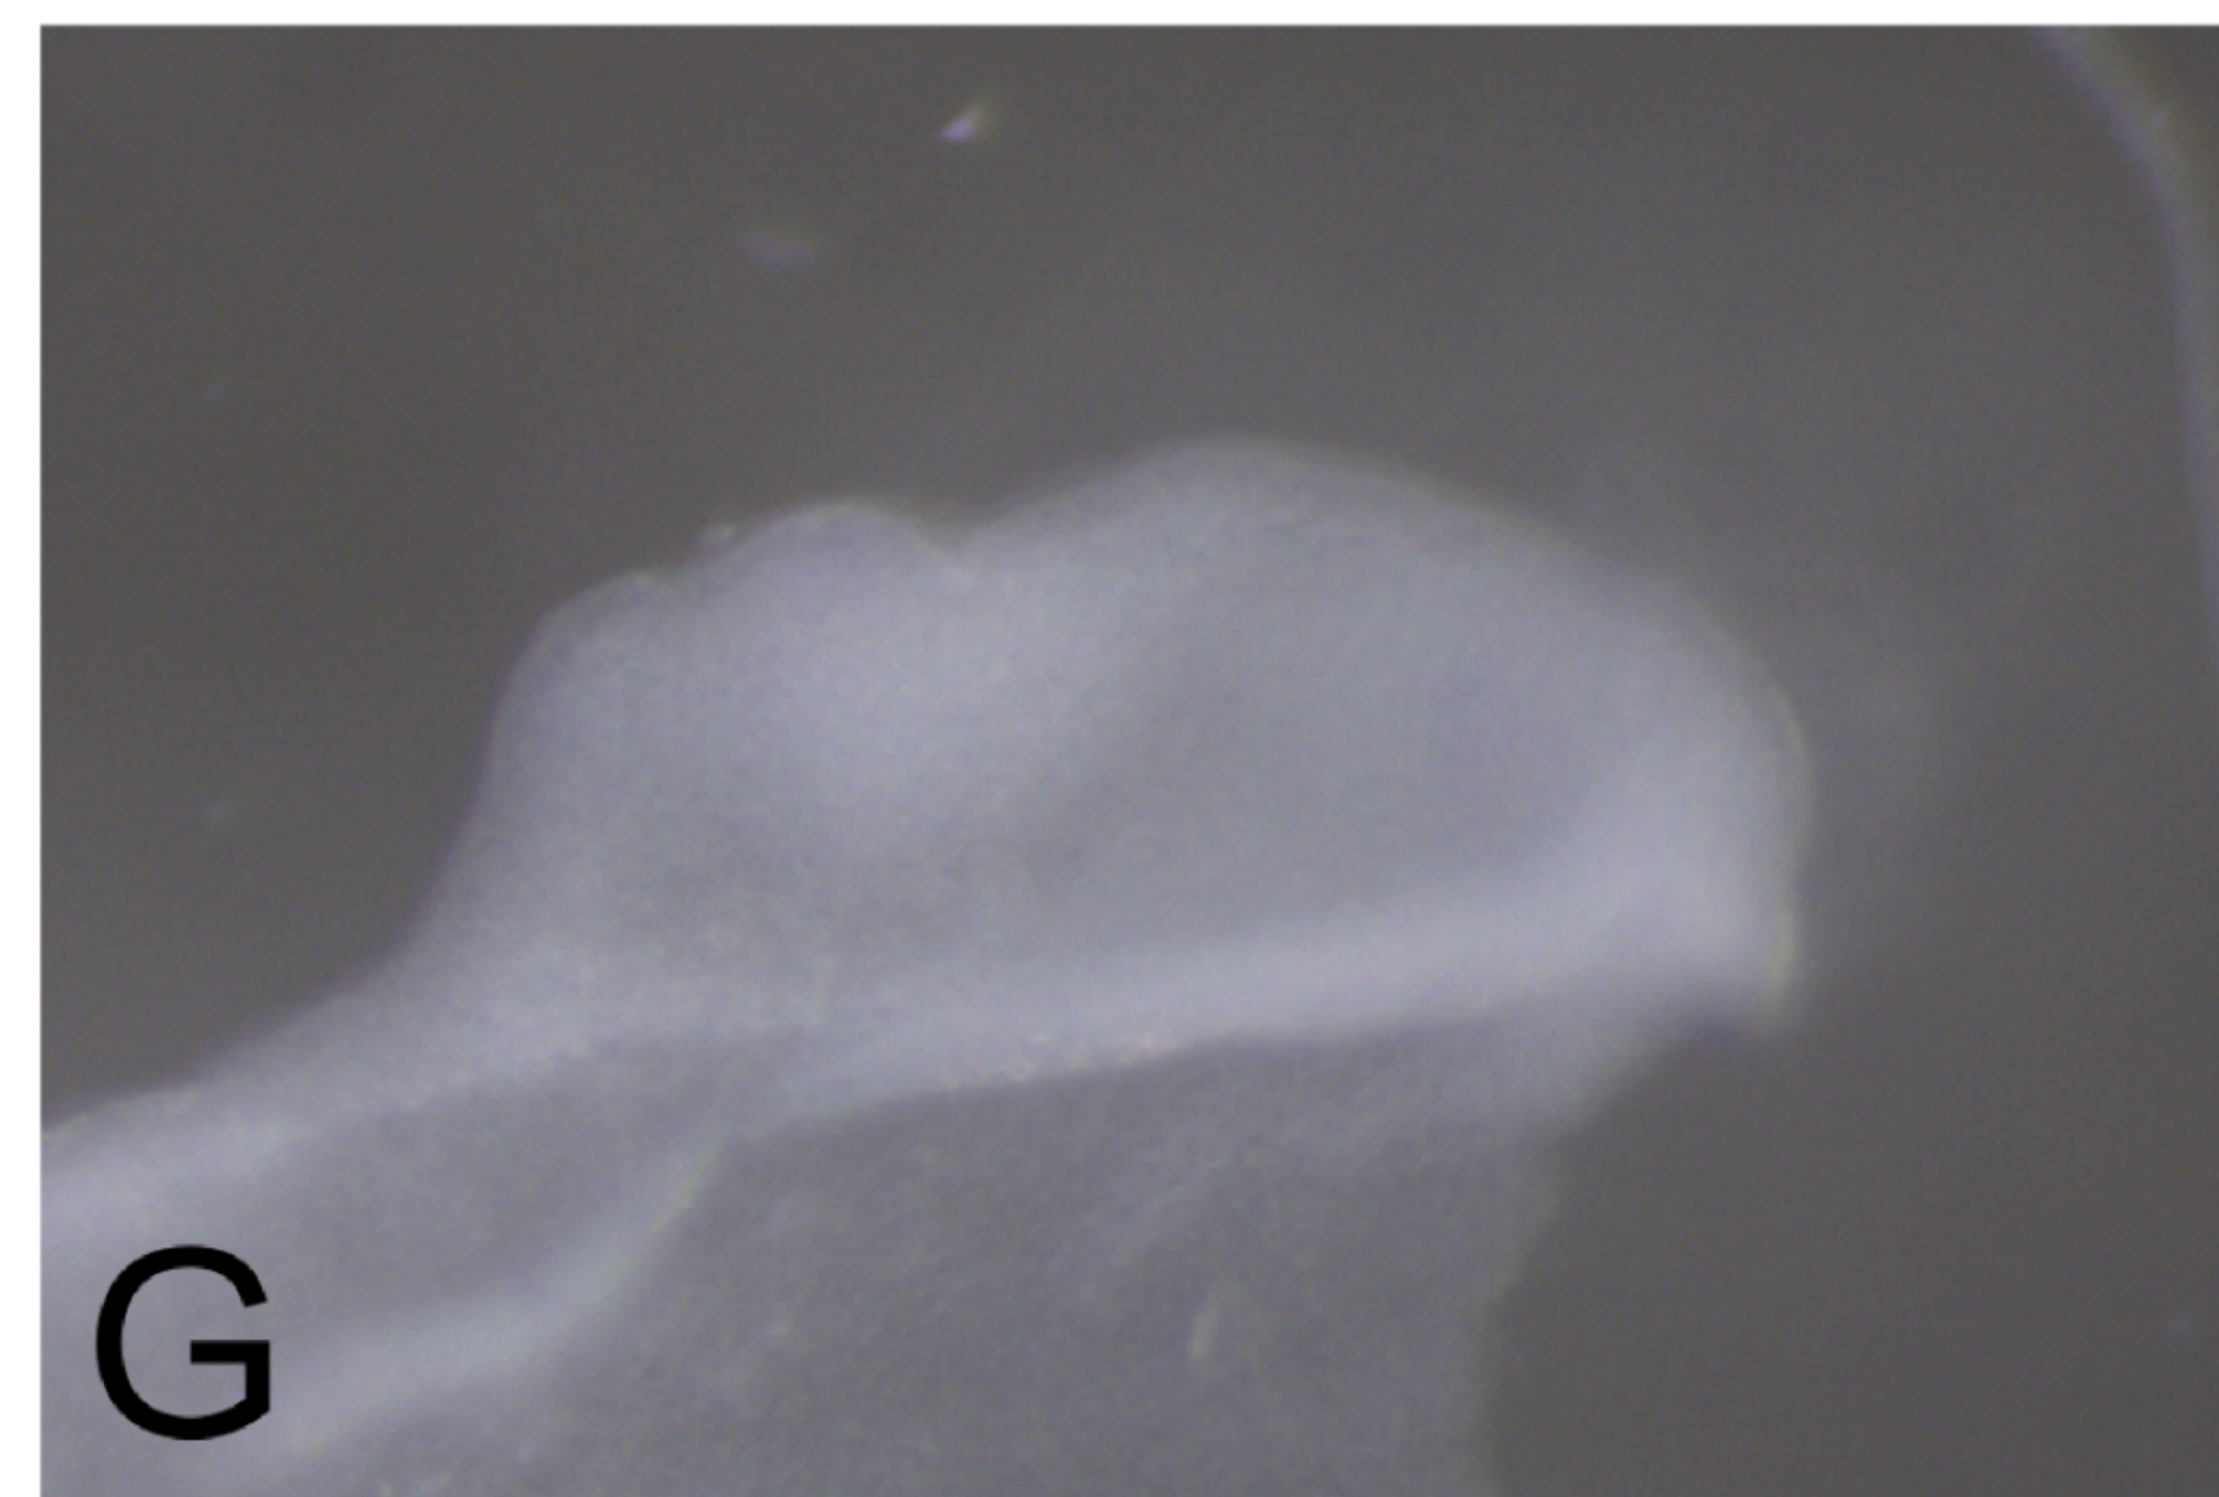

159mg

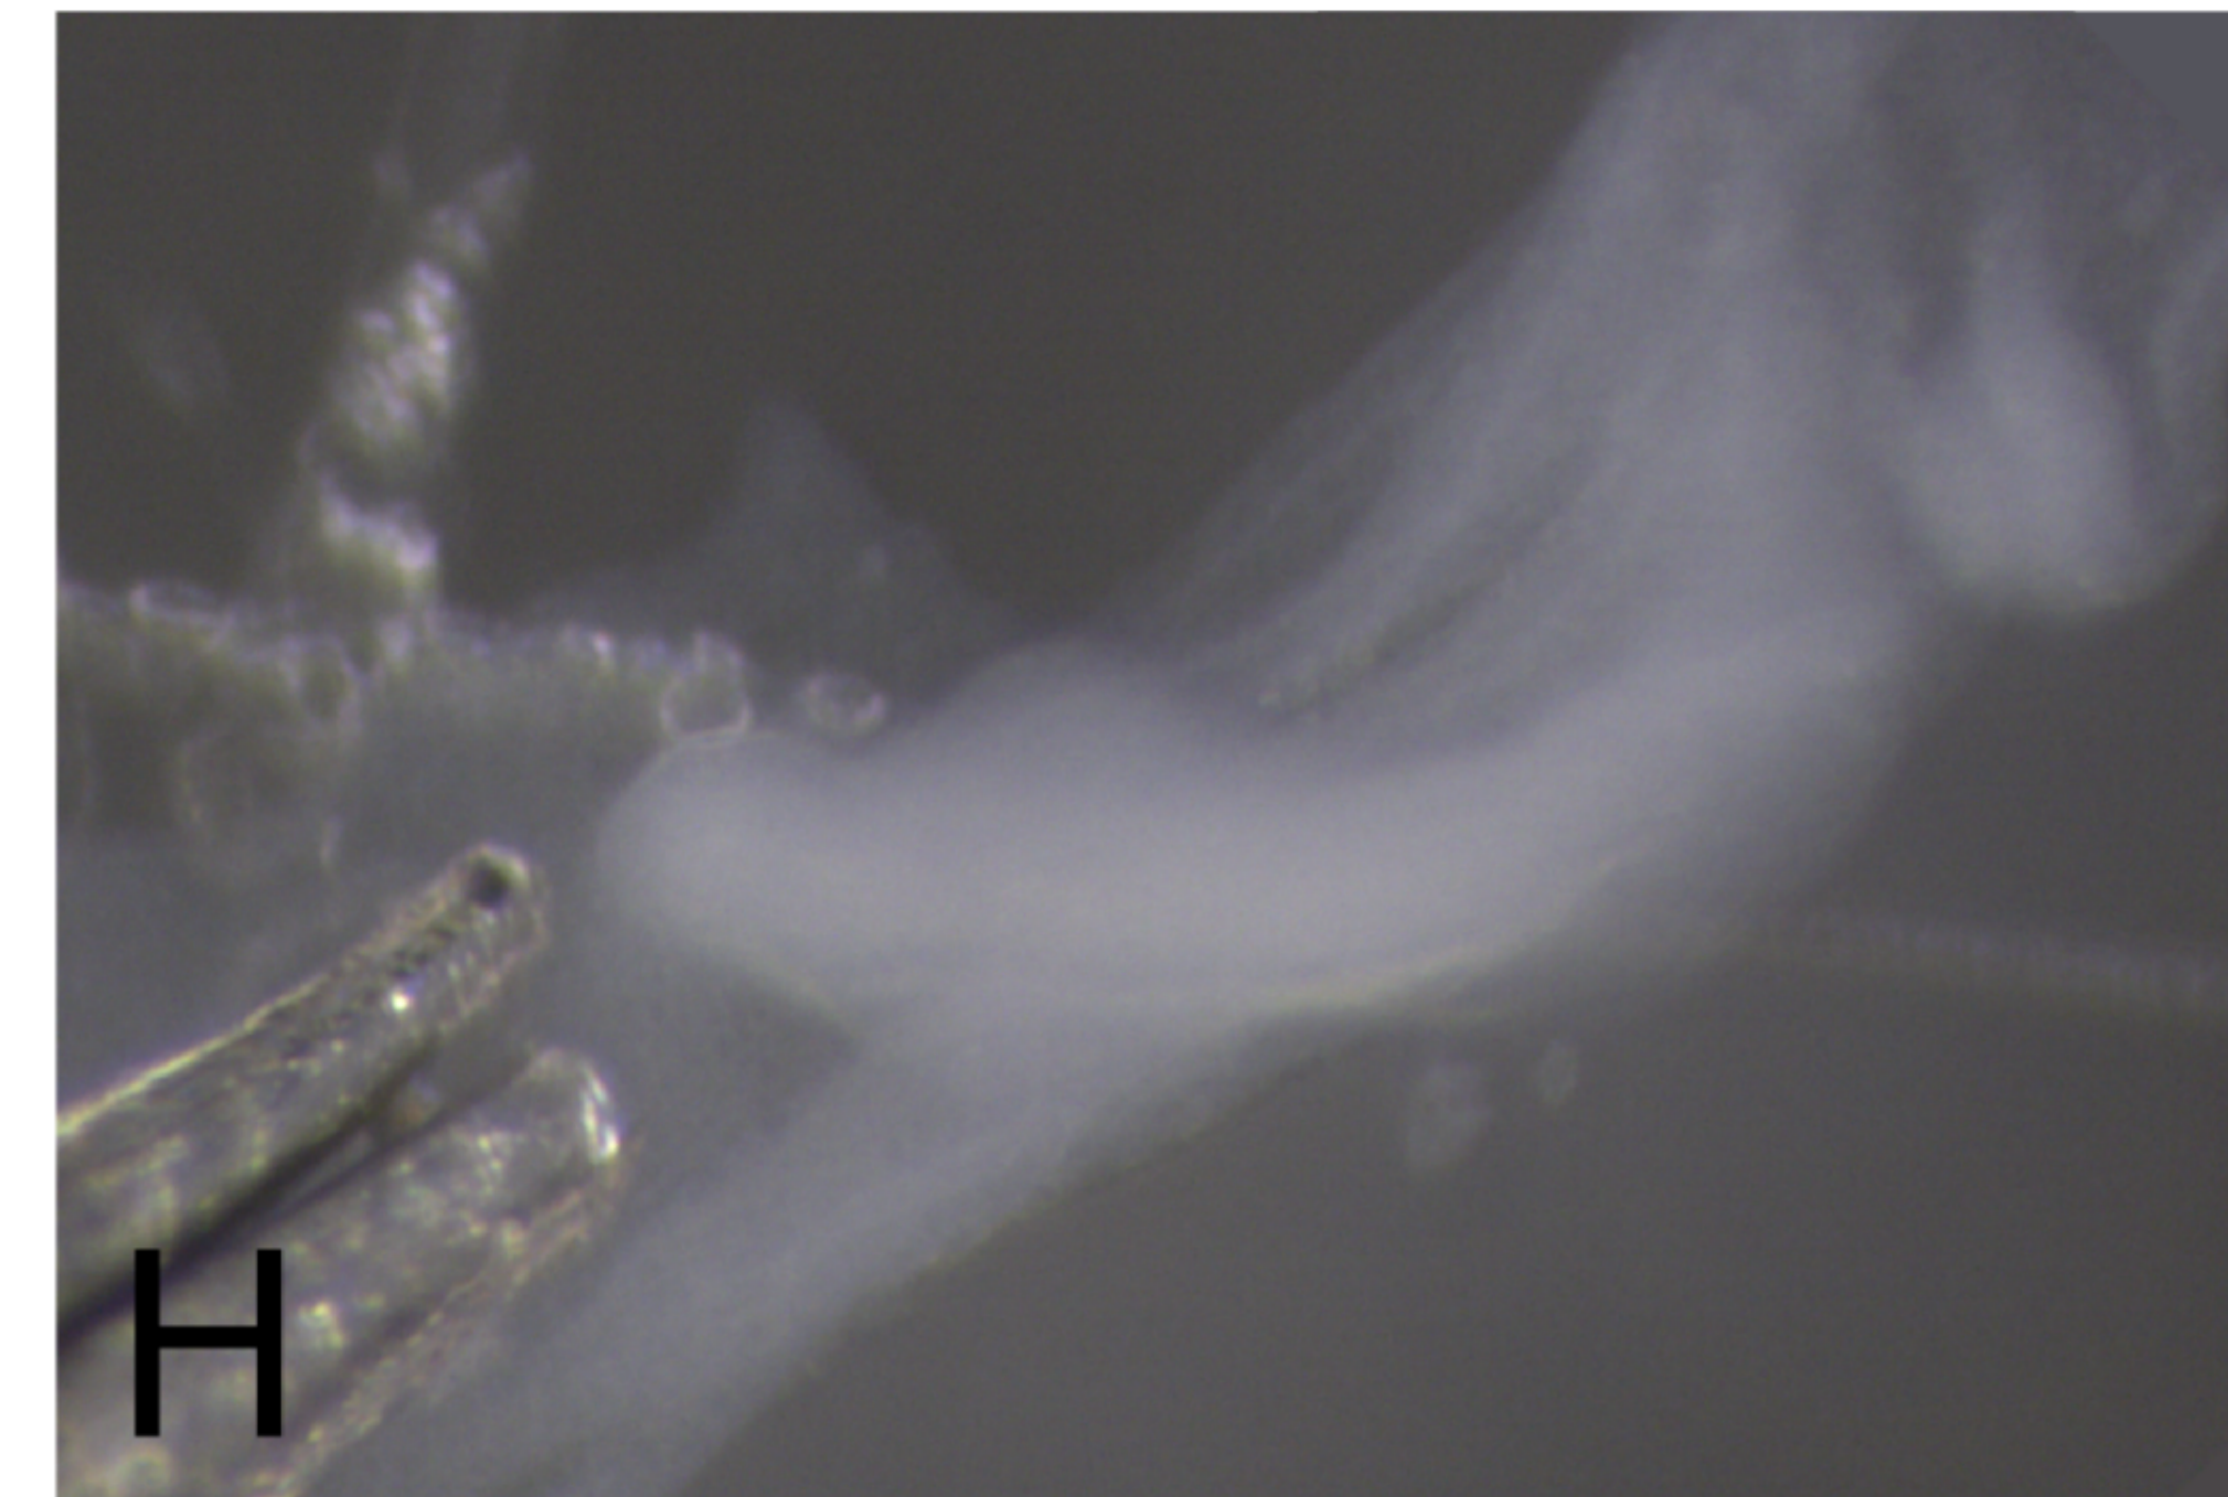

H

14.5 cdpc

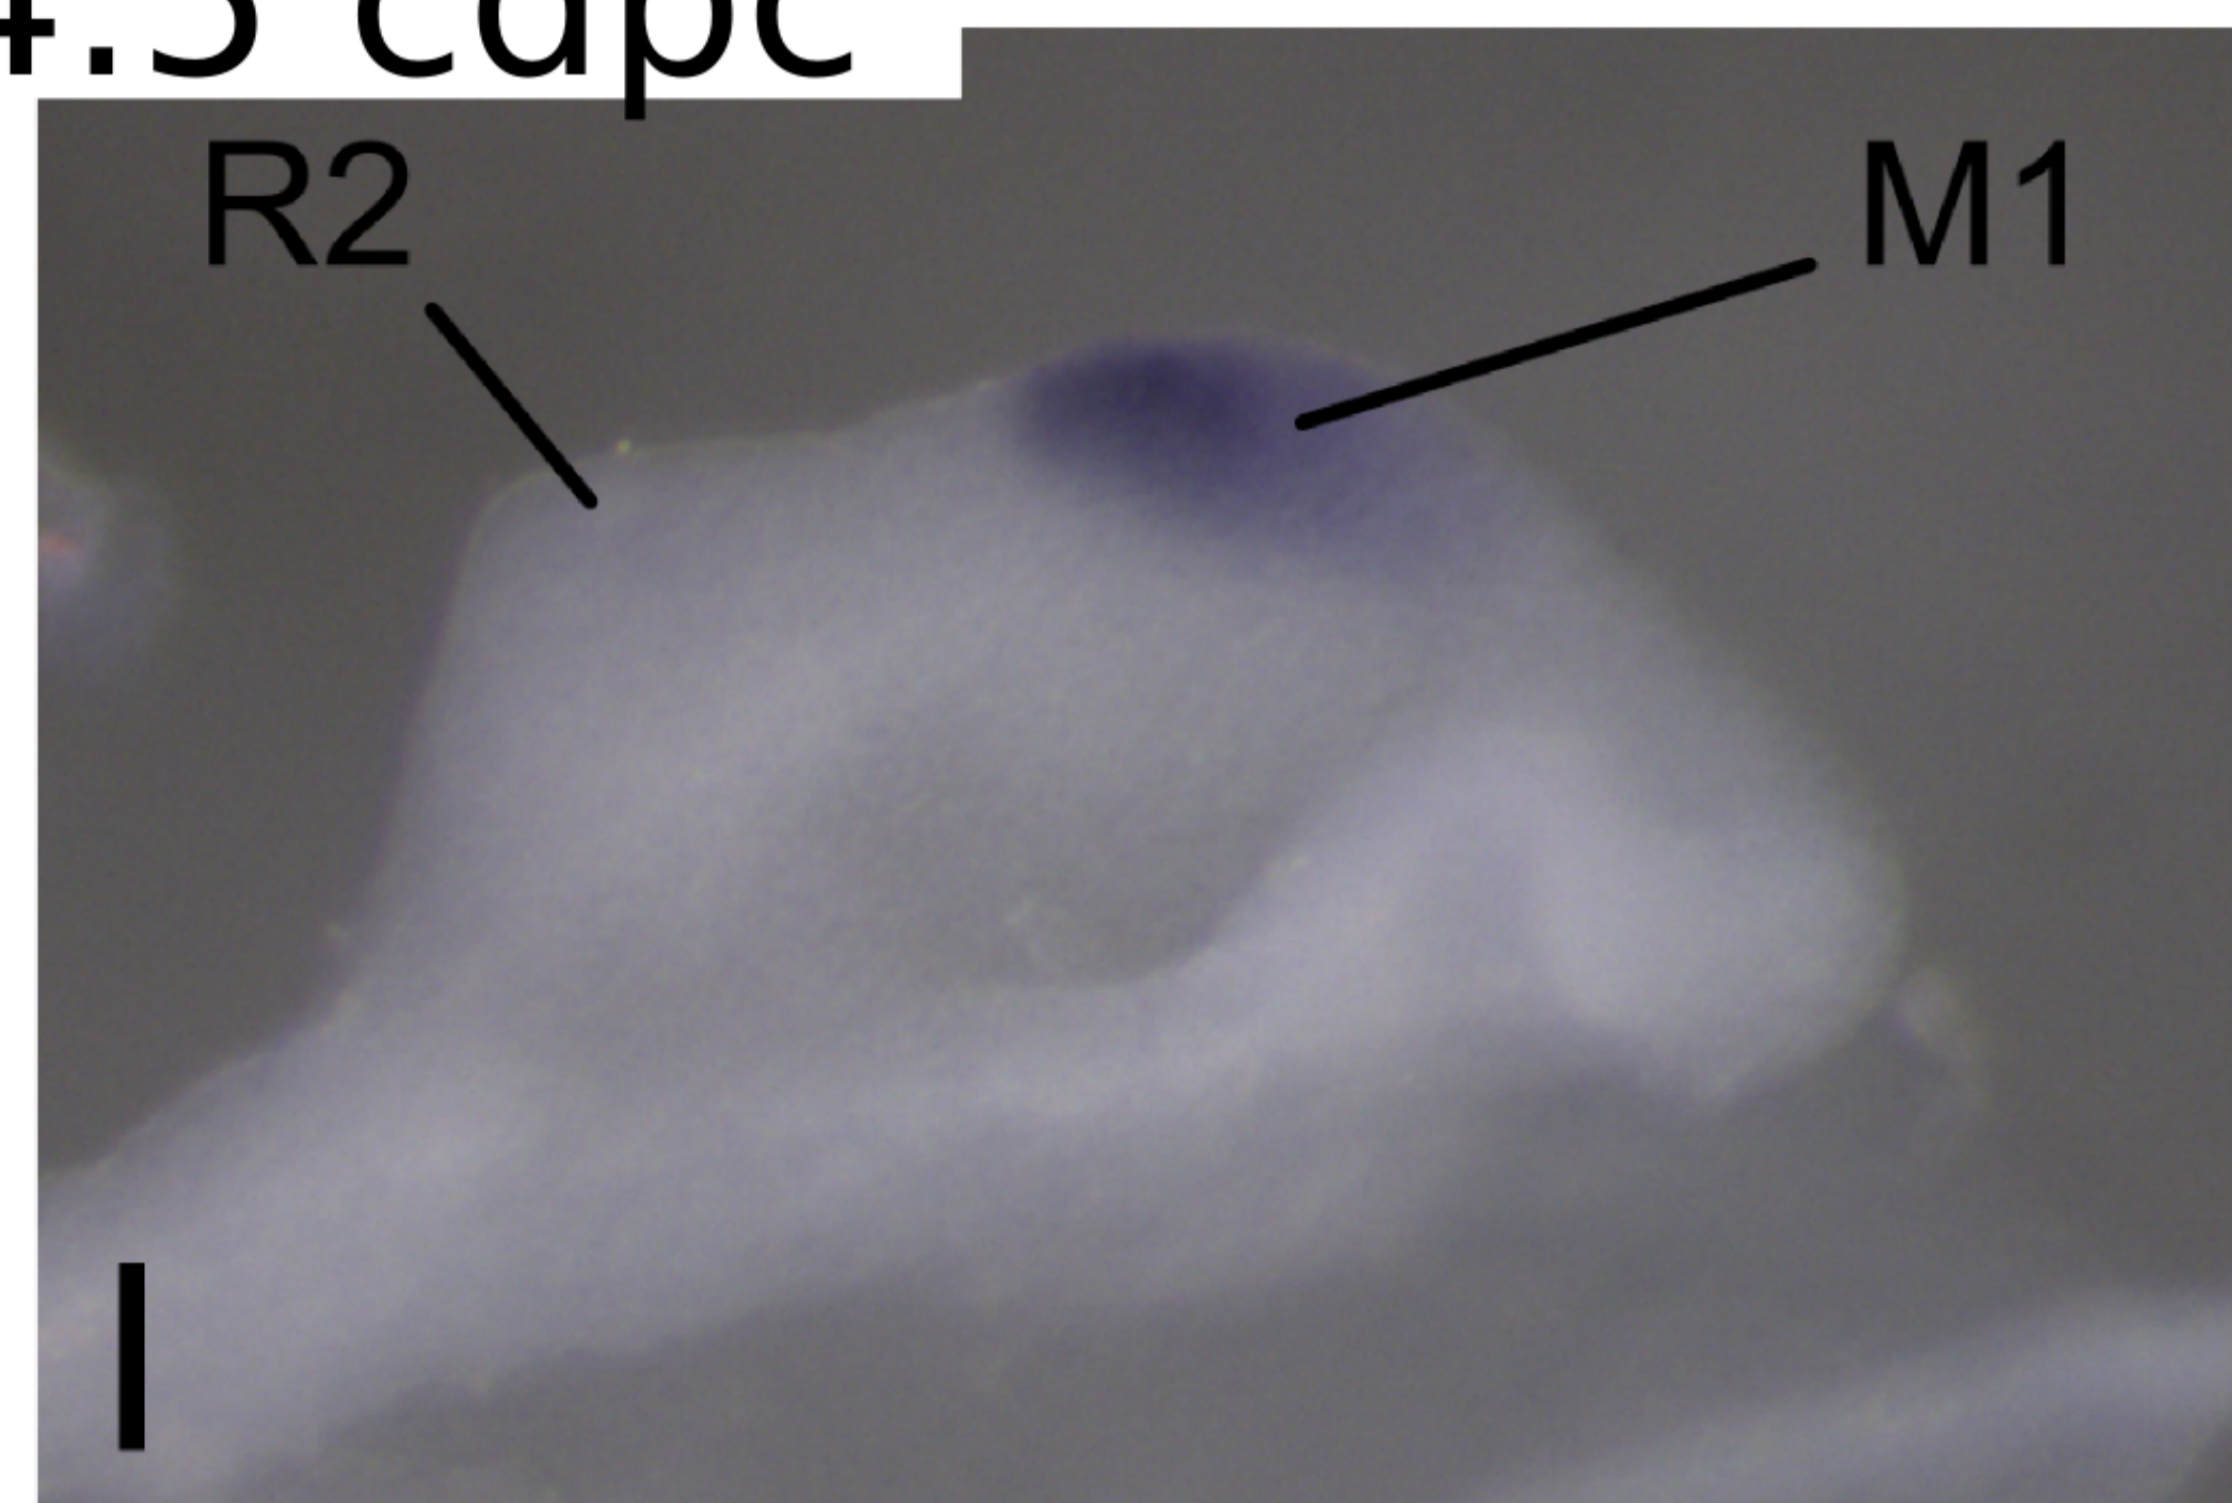

196mg

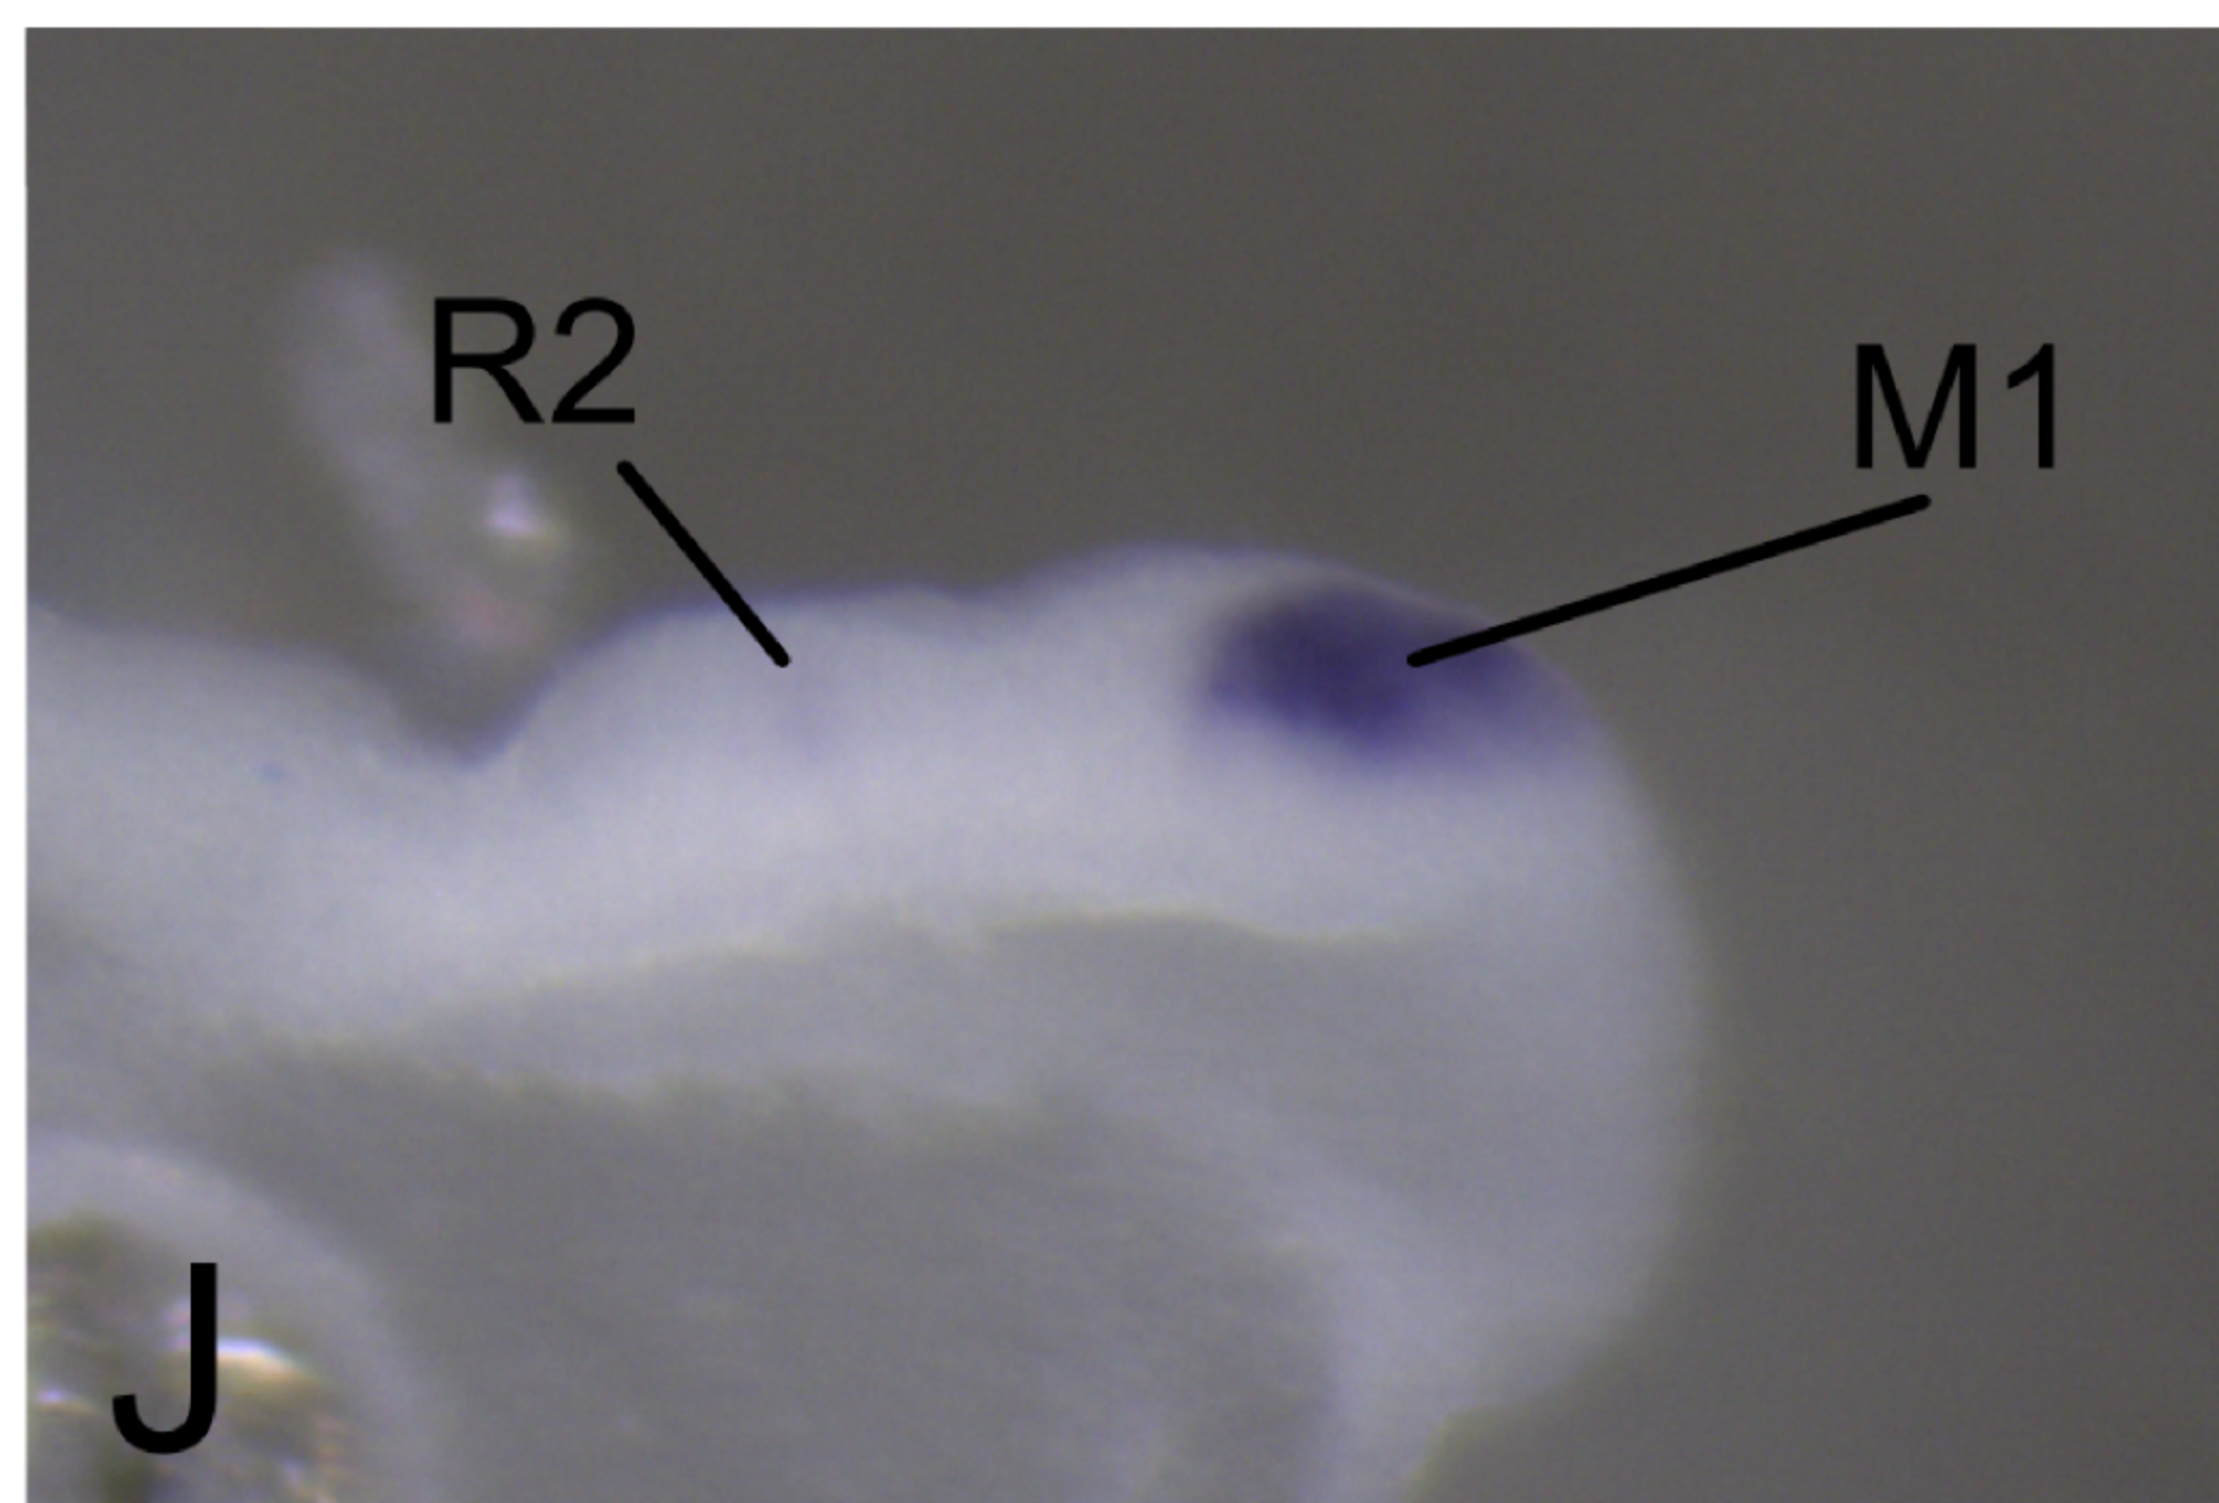

J

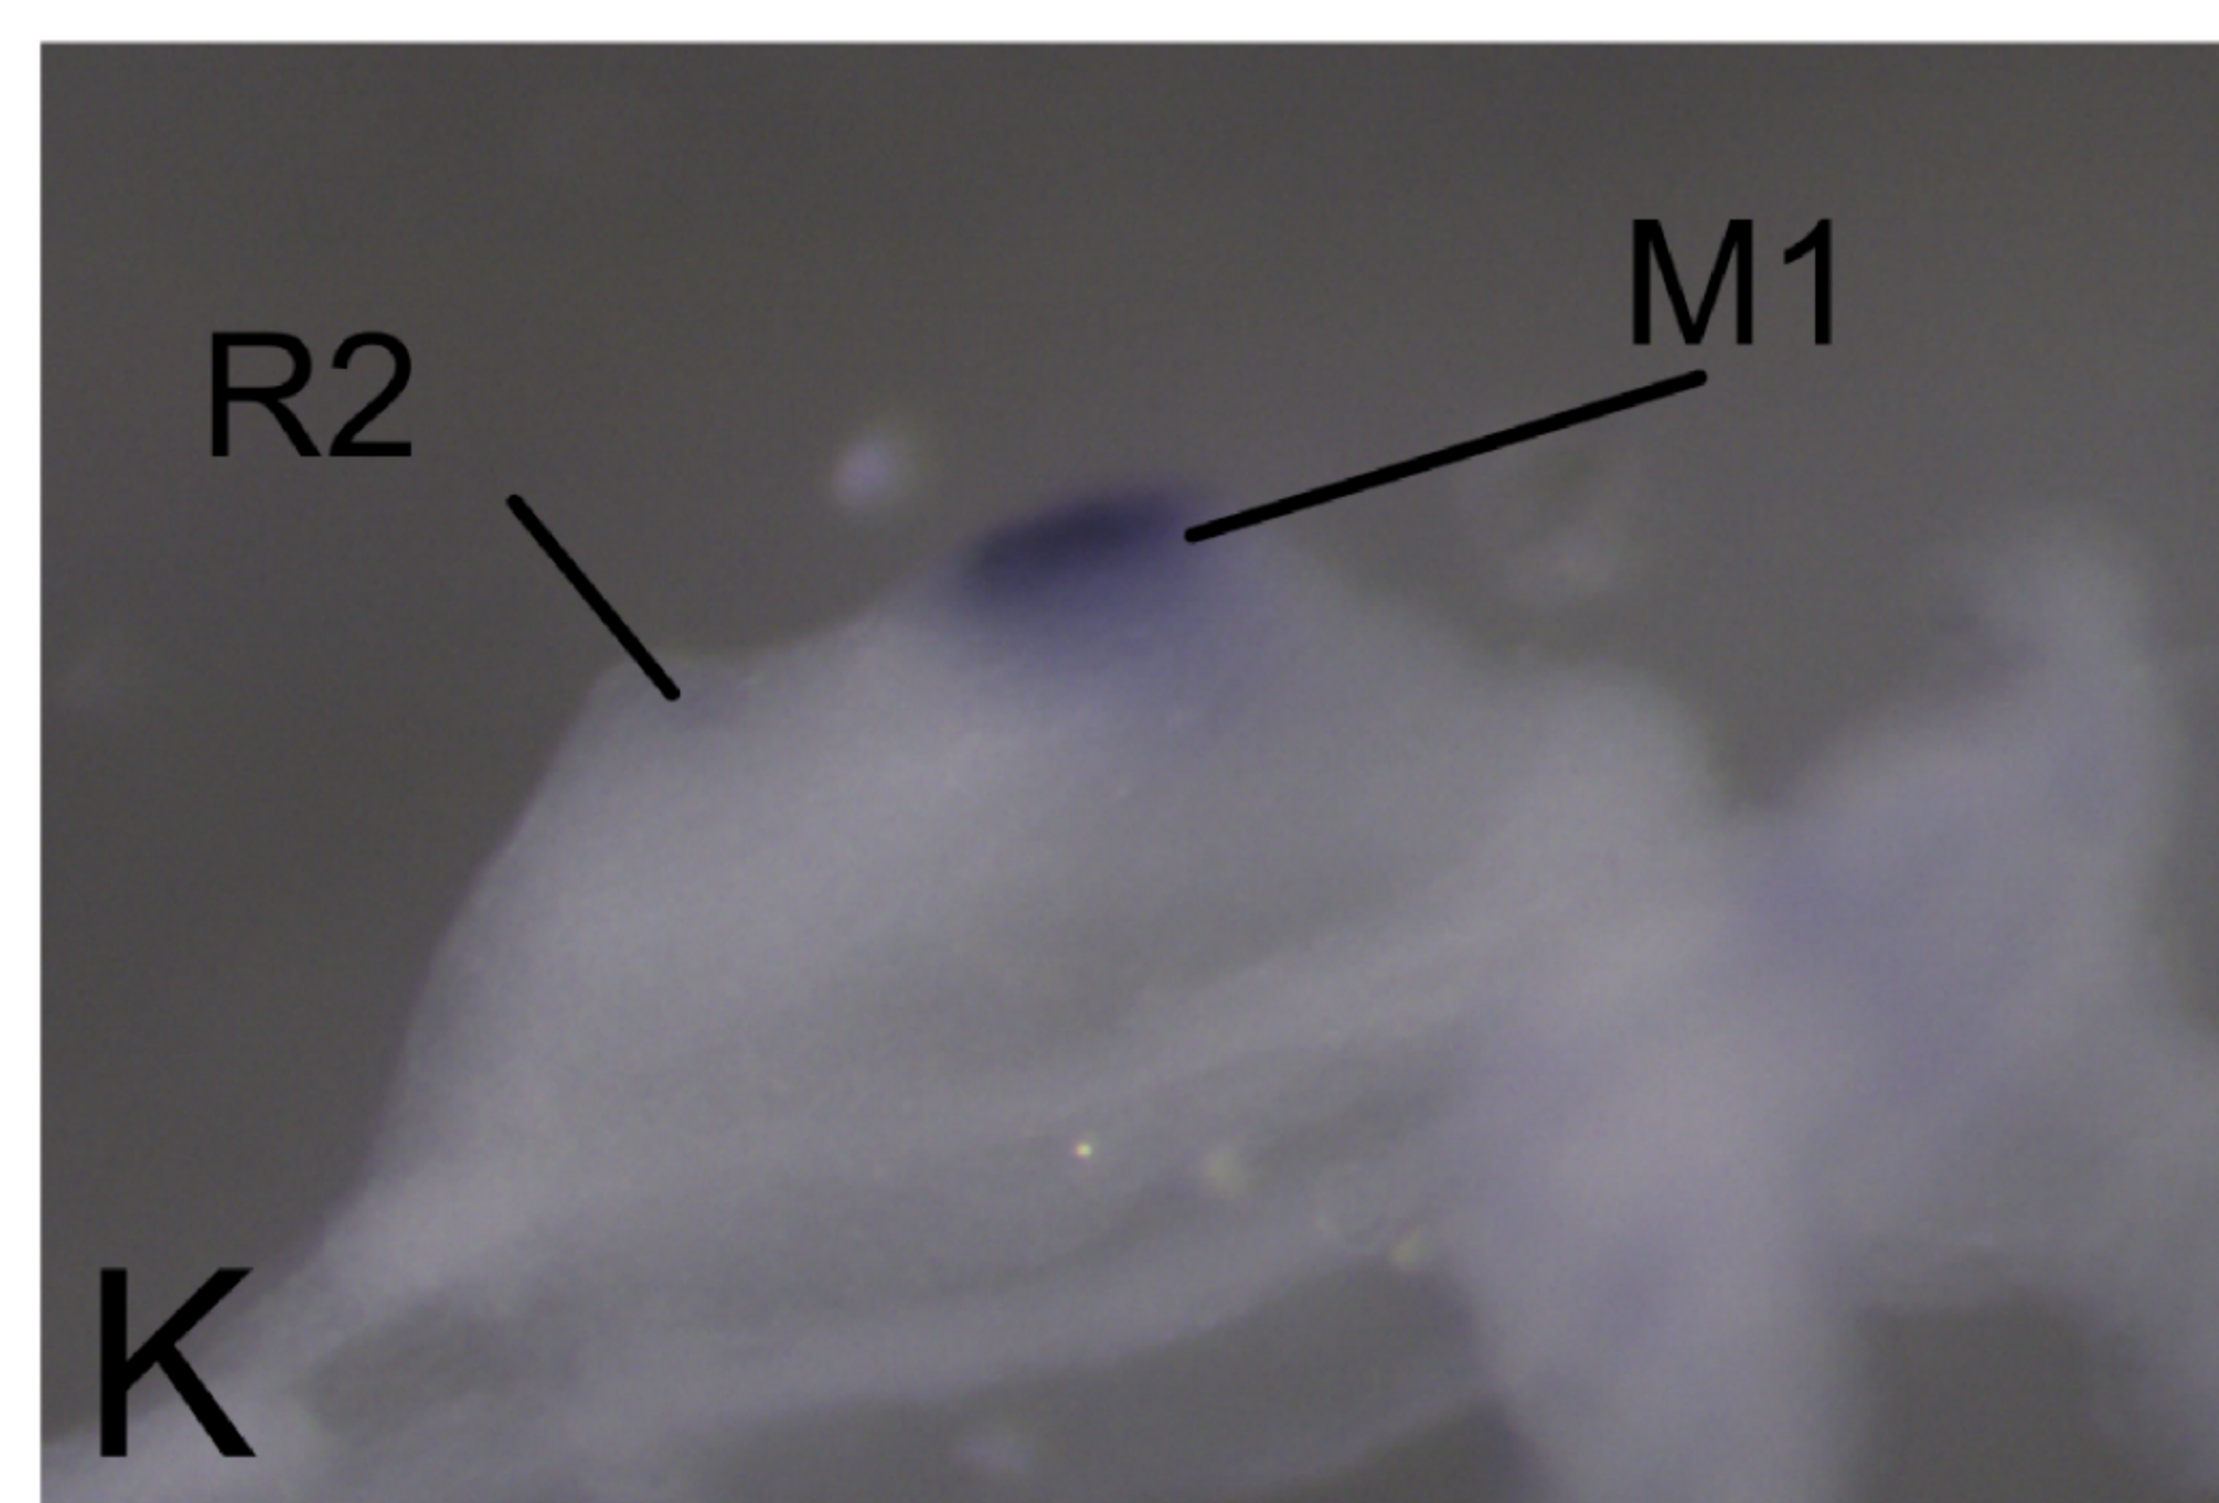

193mg

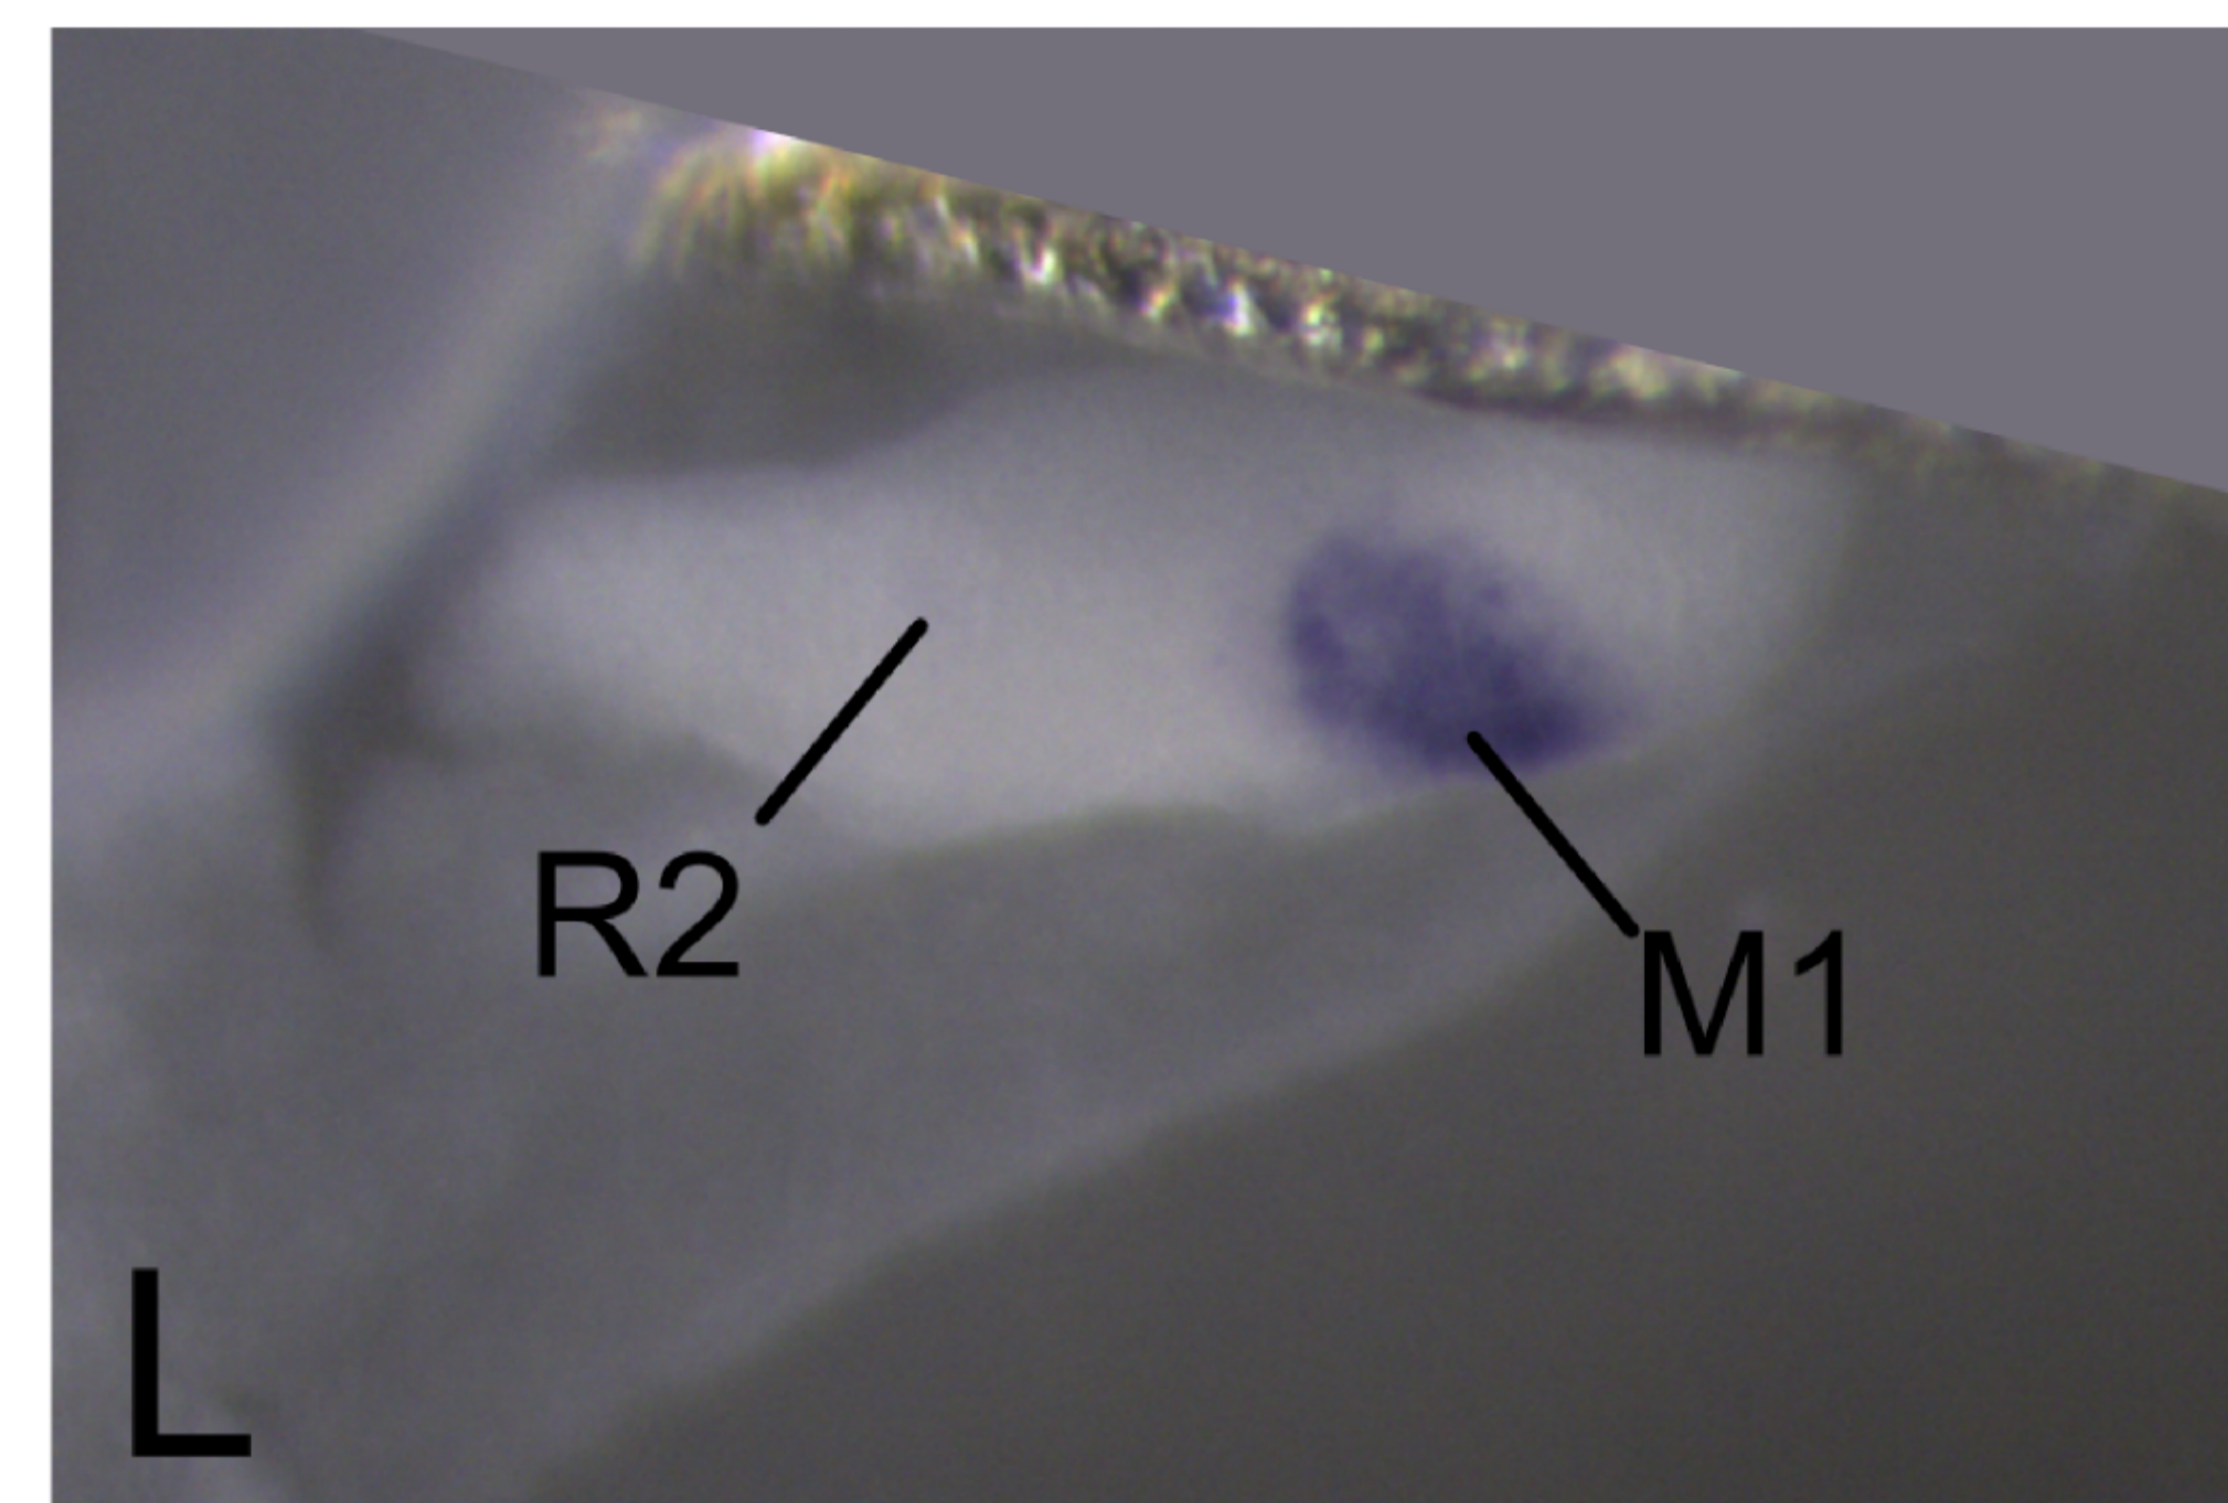

L

14.75 cdpc

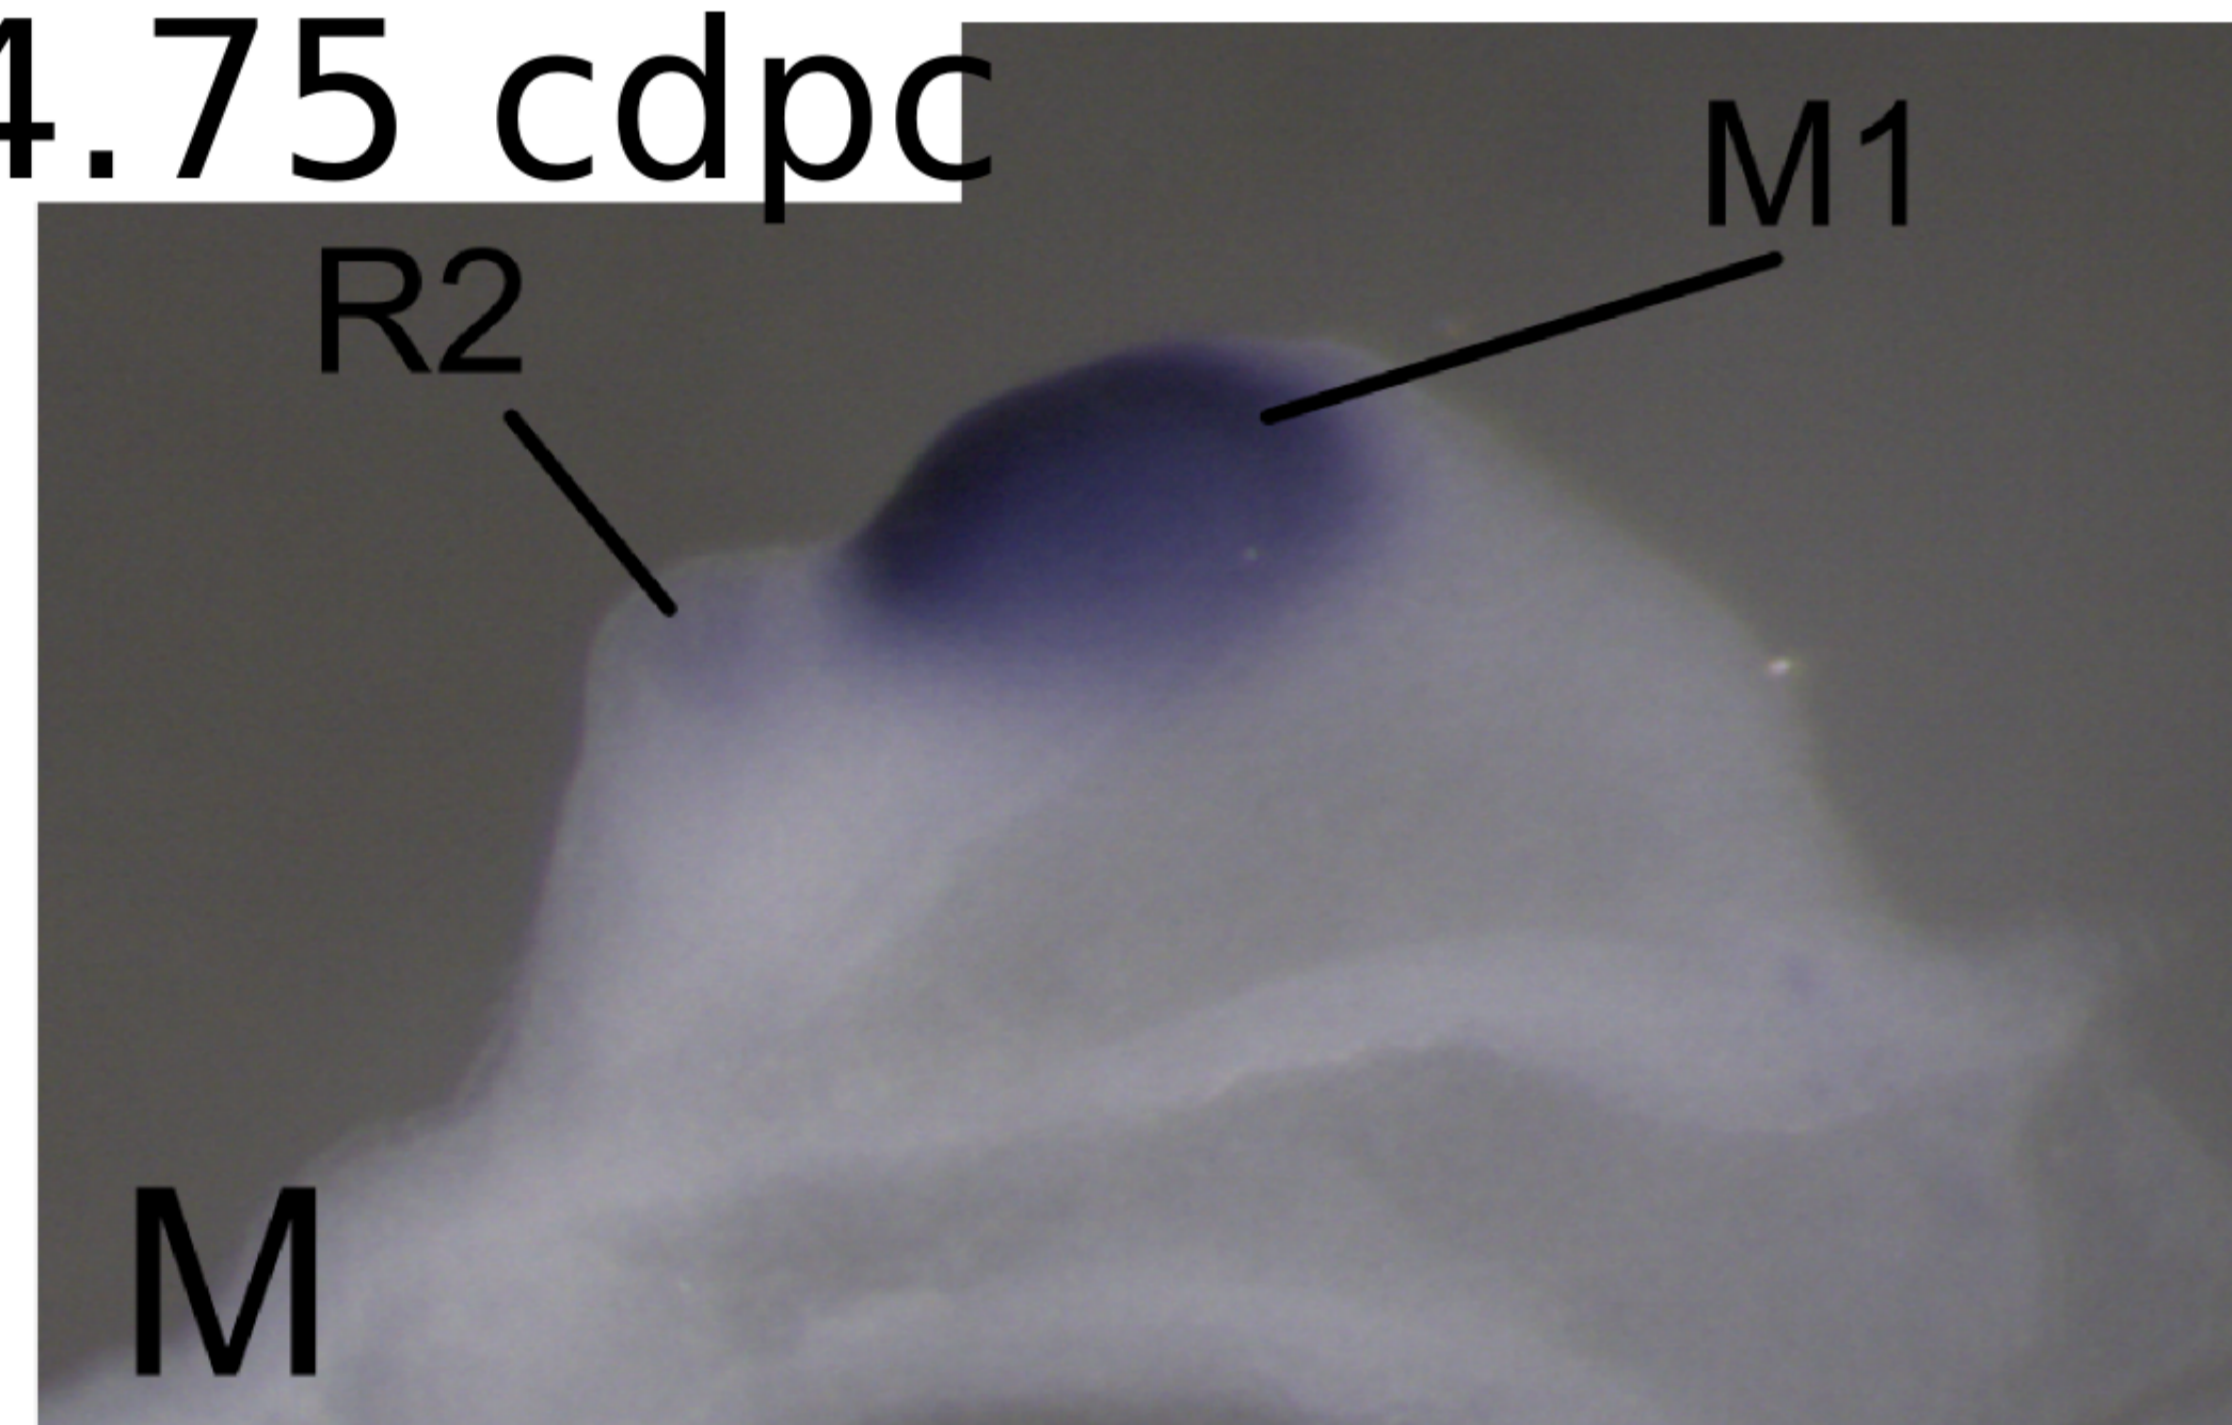

217-218mg

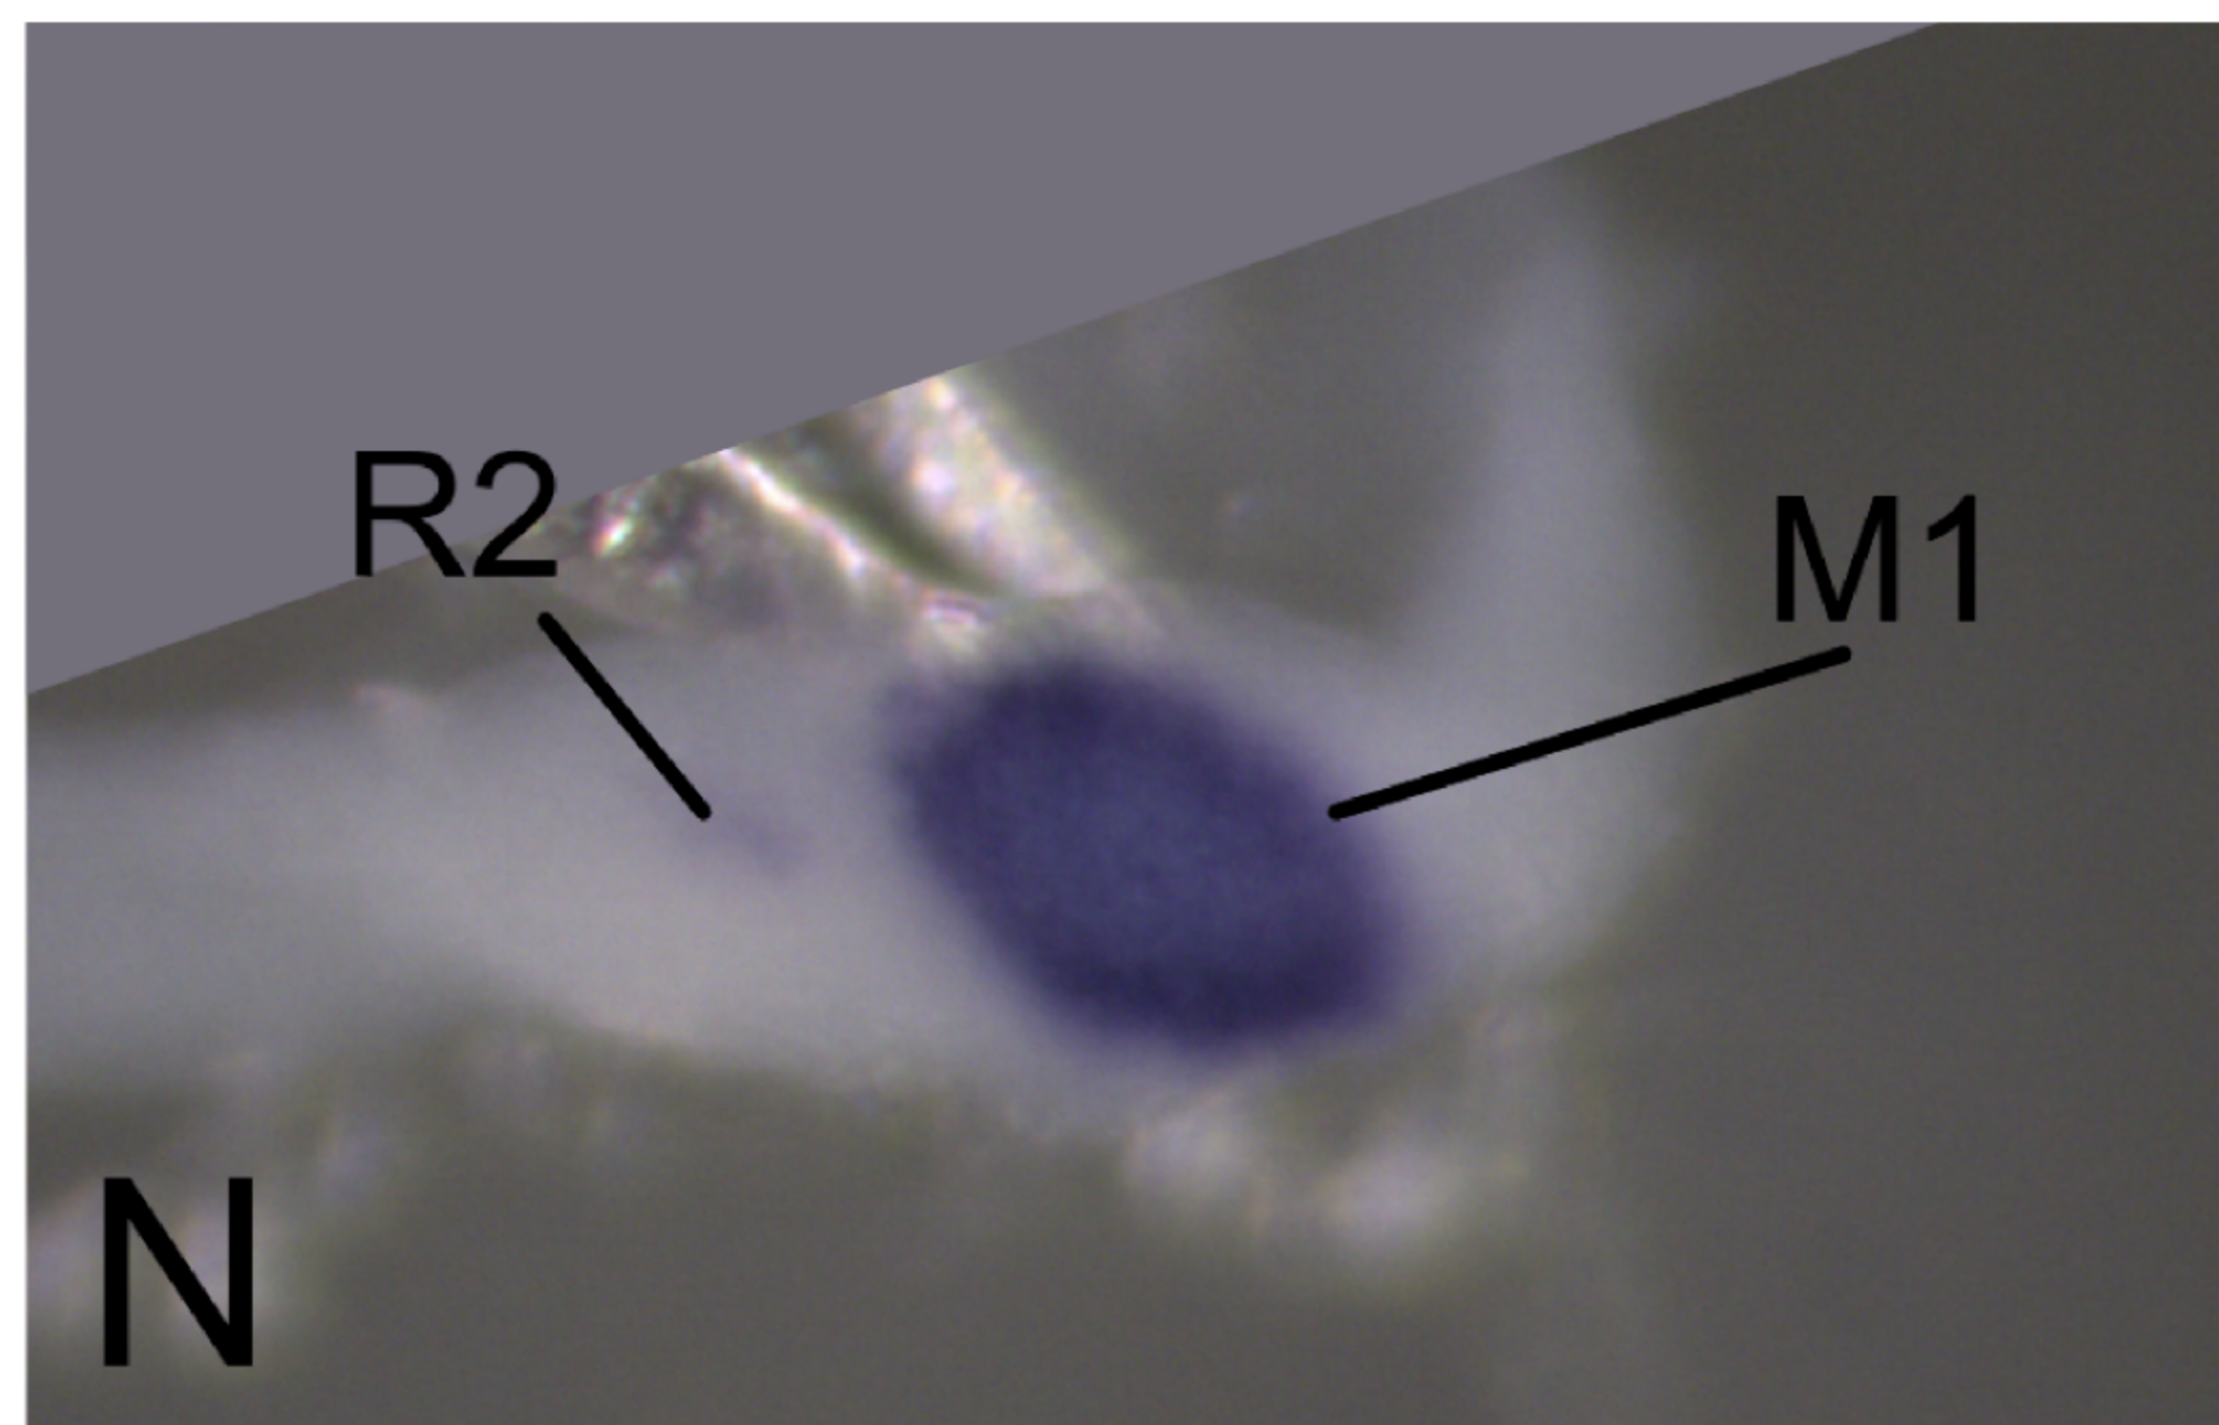

N

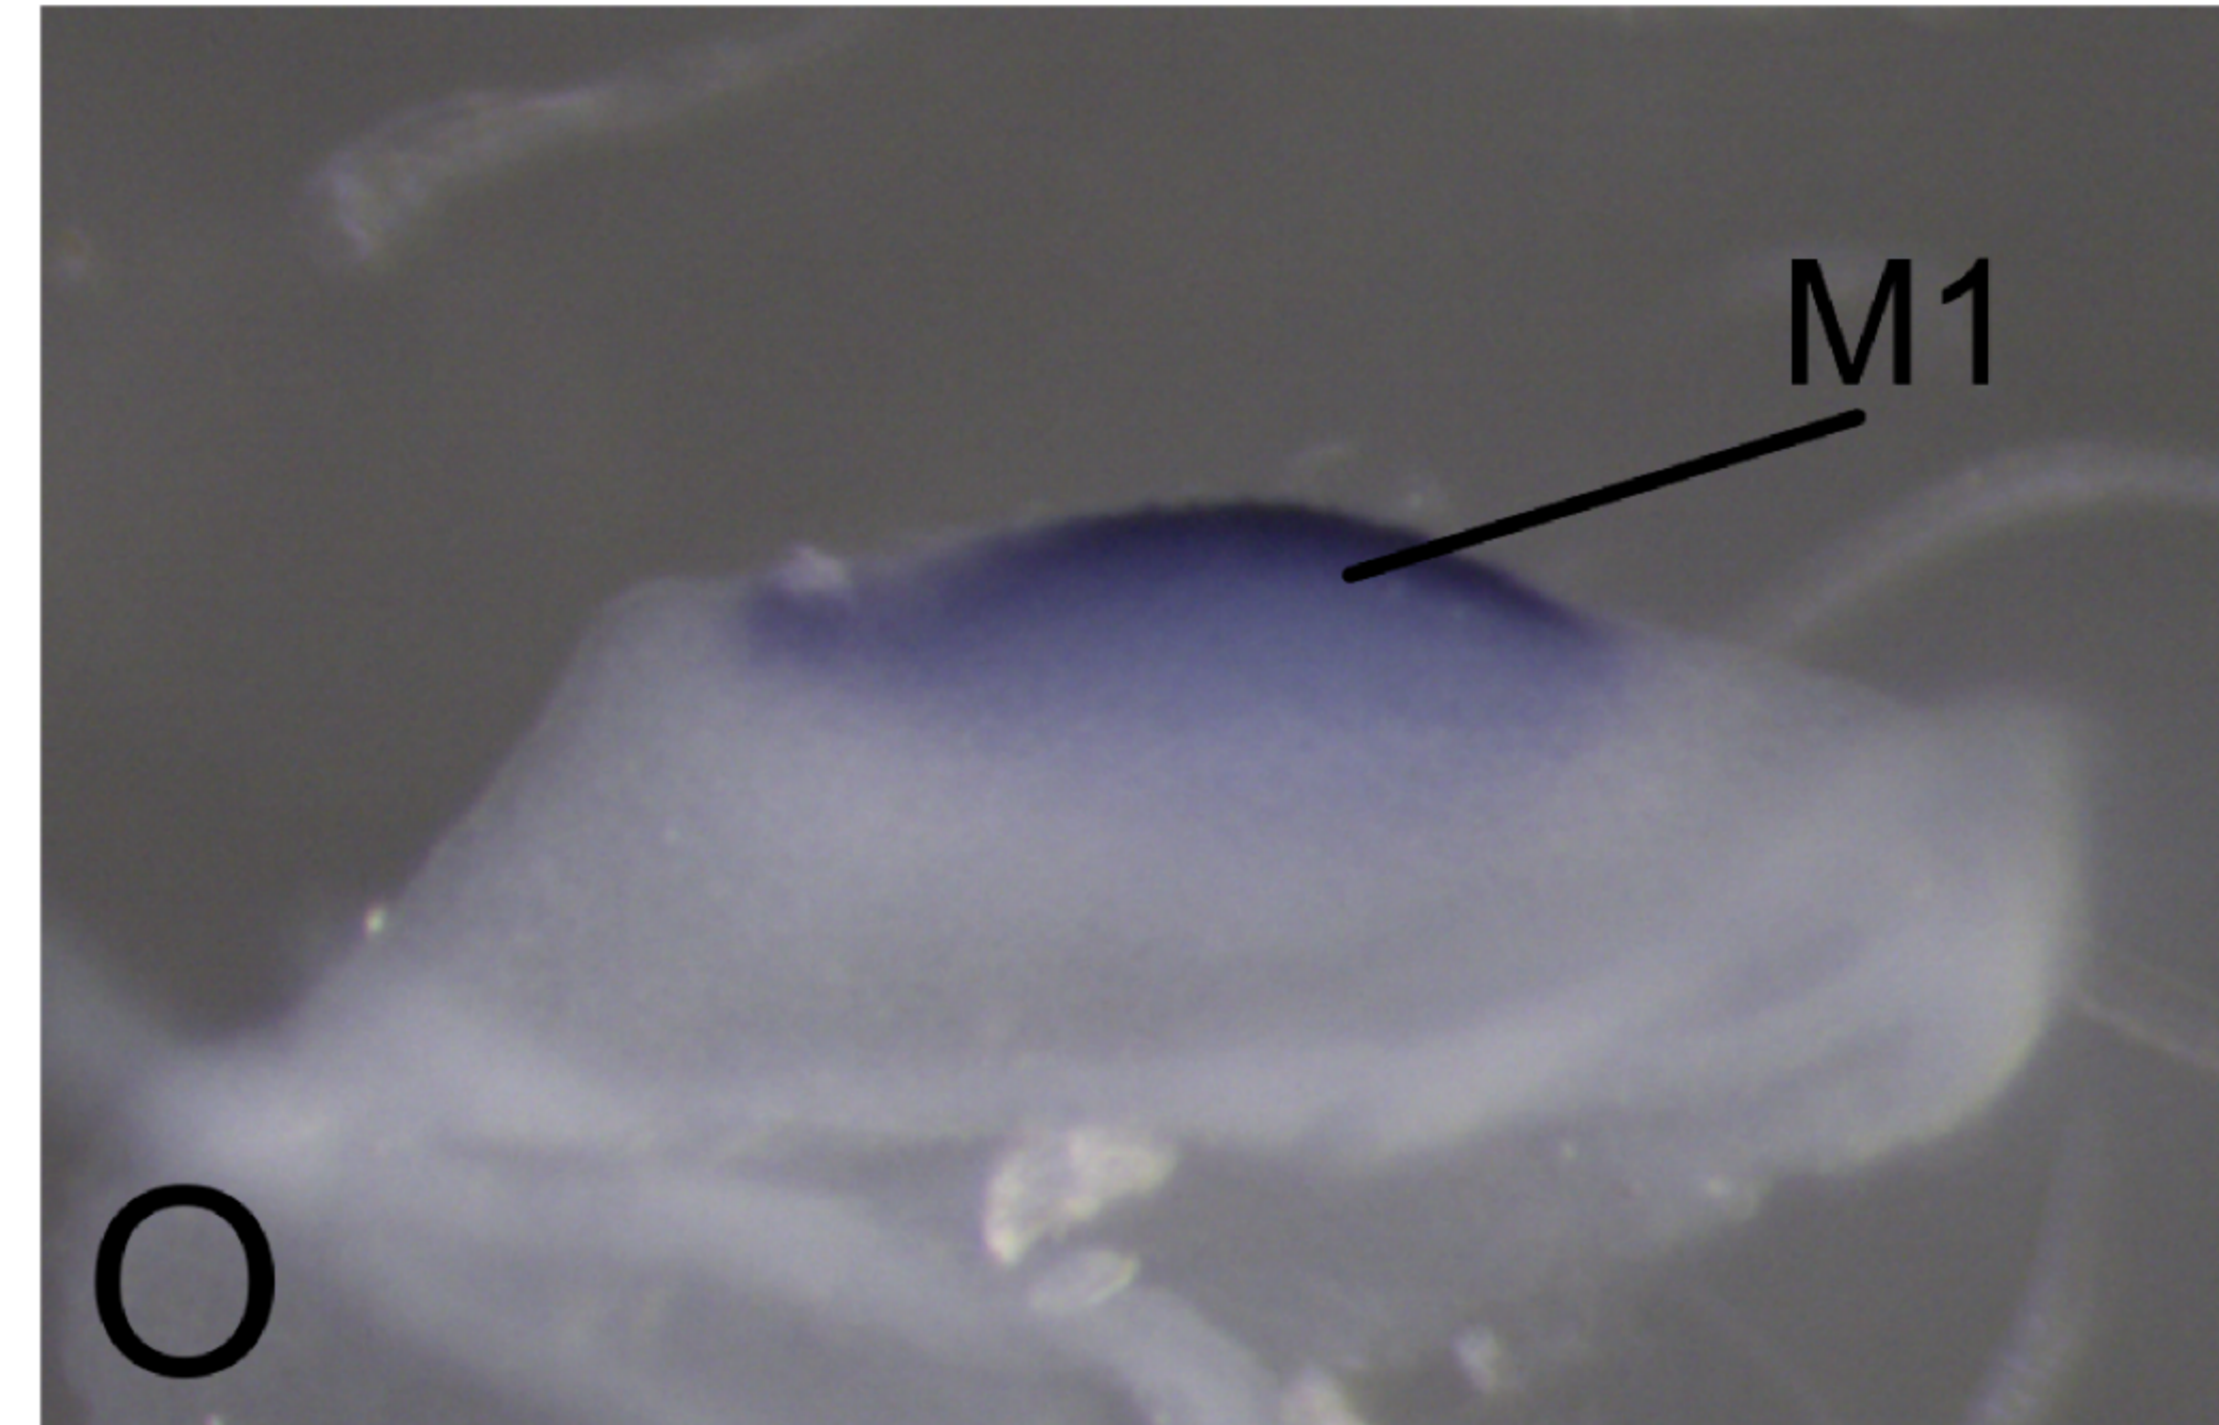

221mg

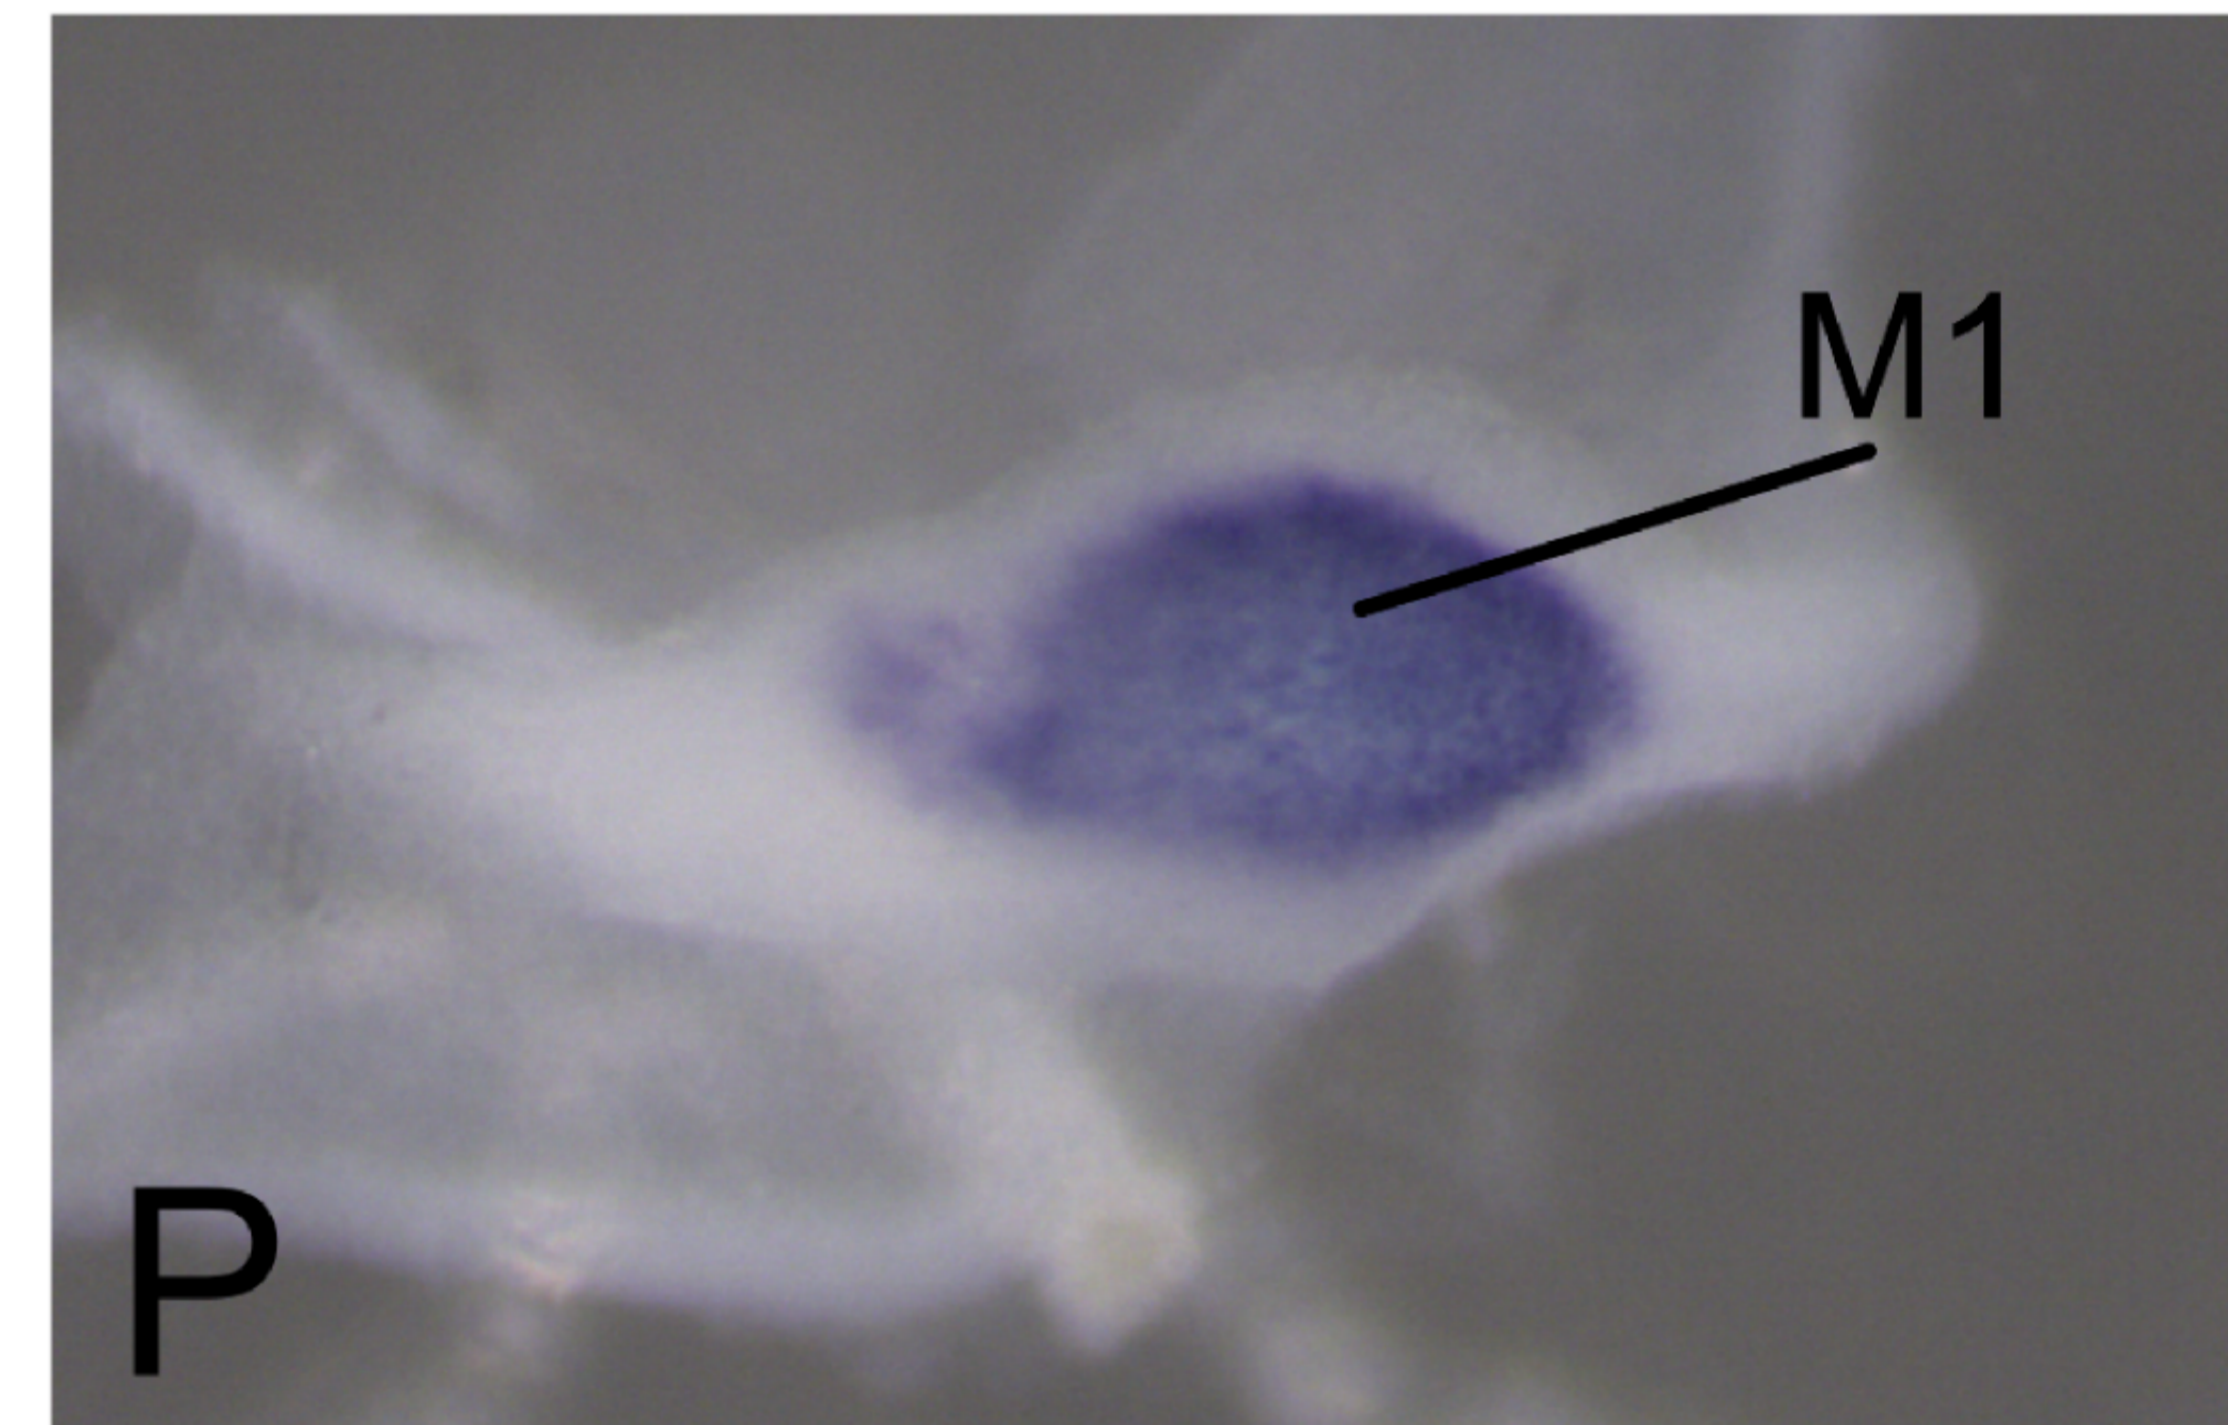

P

15.0 cdpc

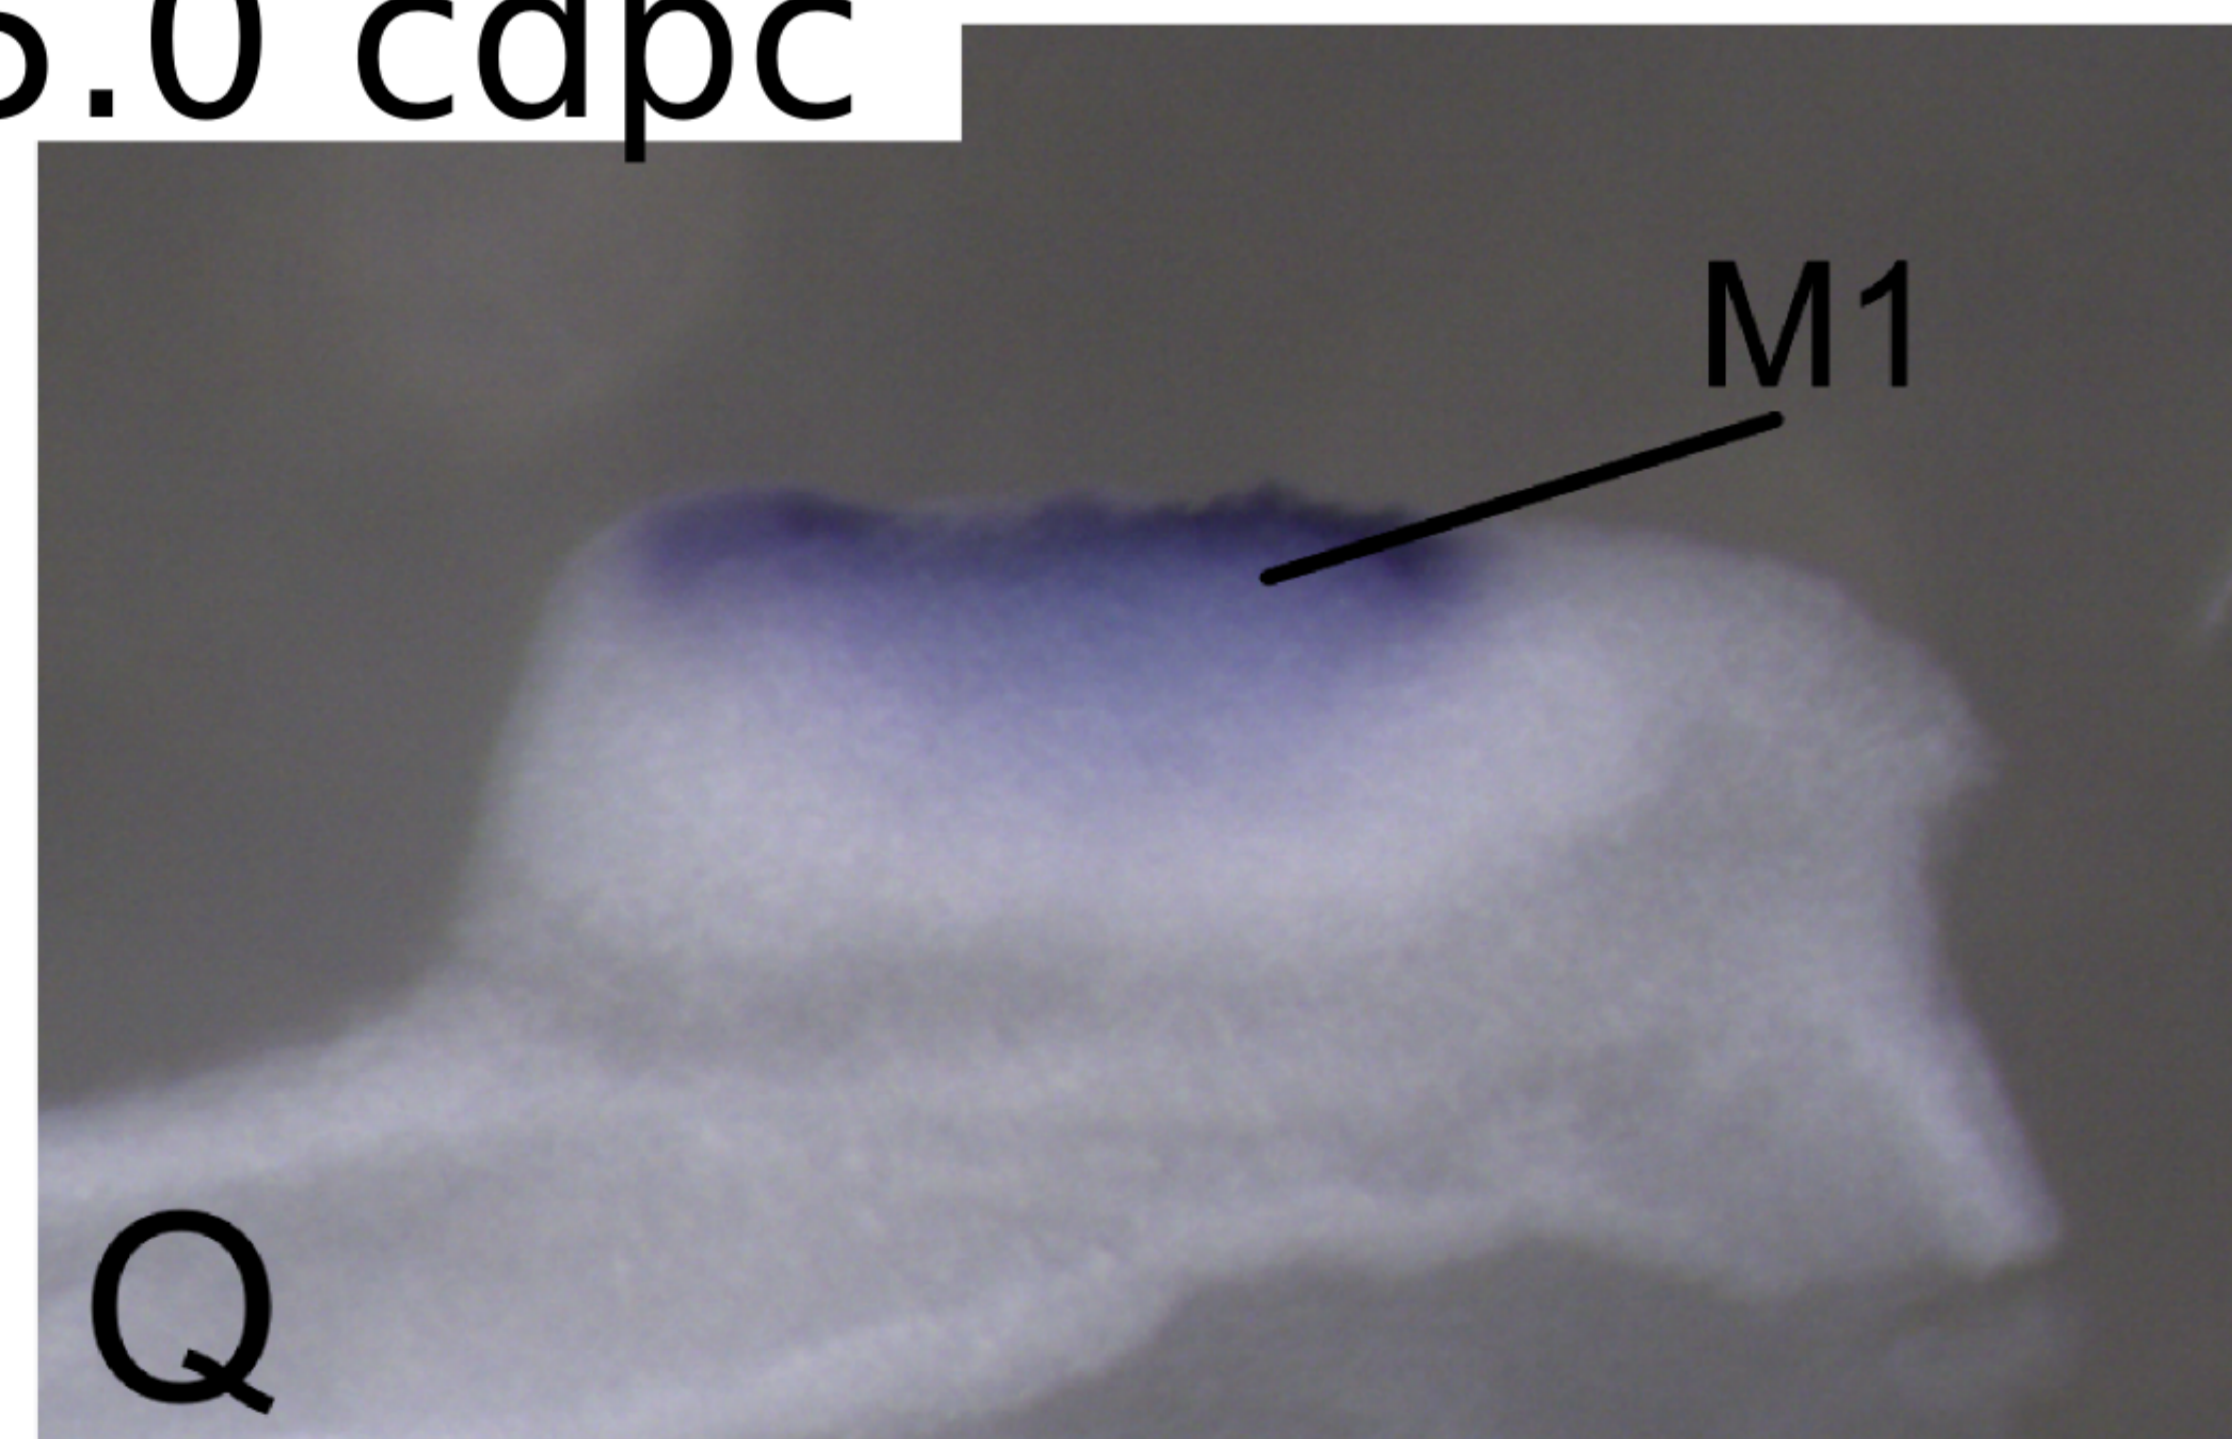

246mg

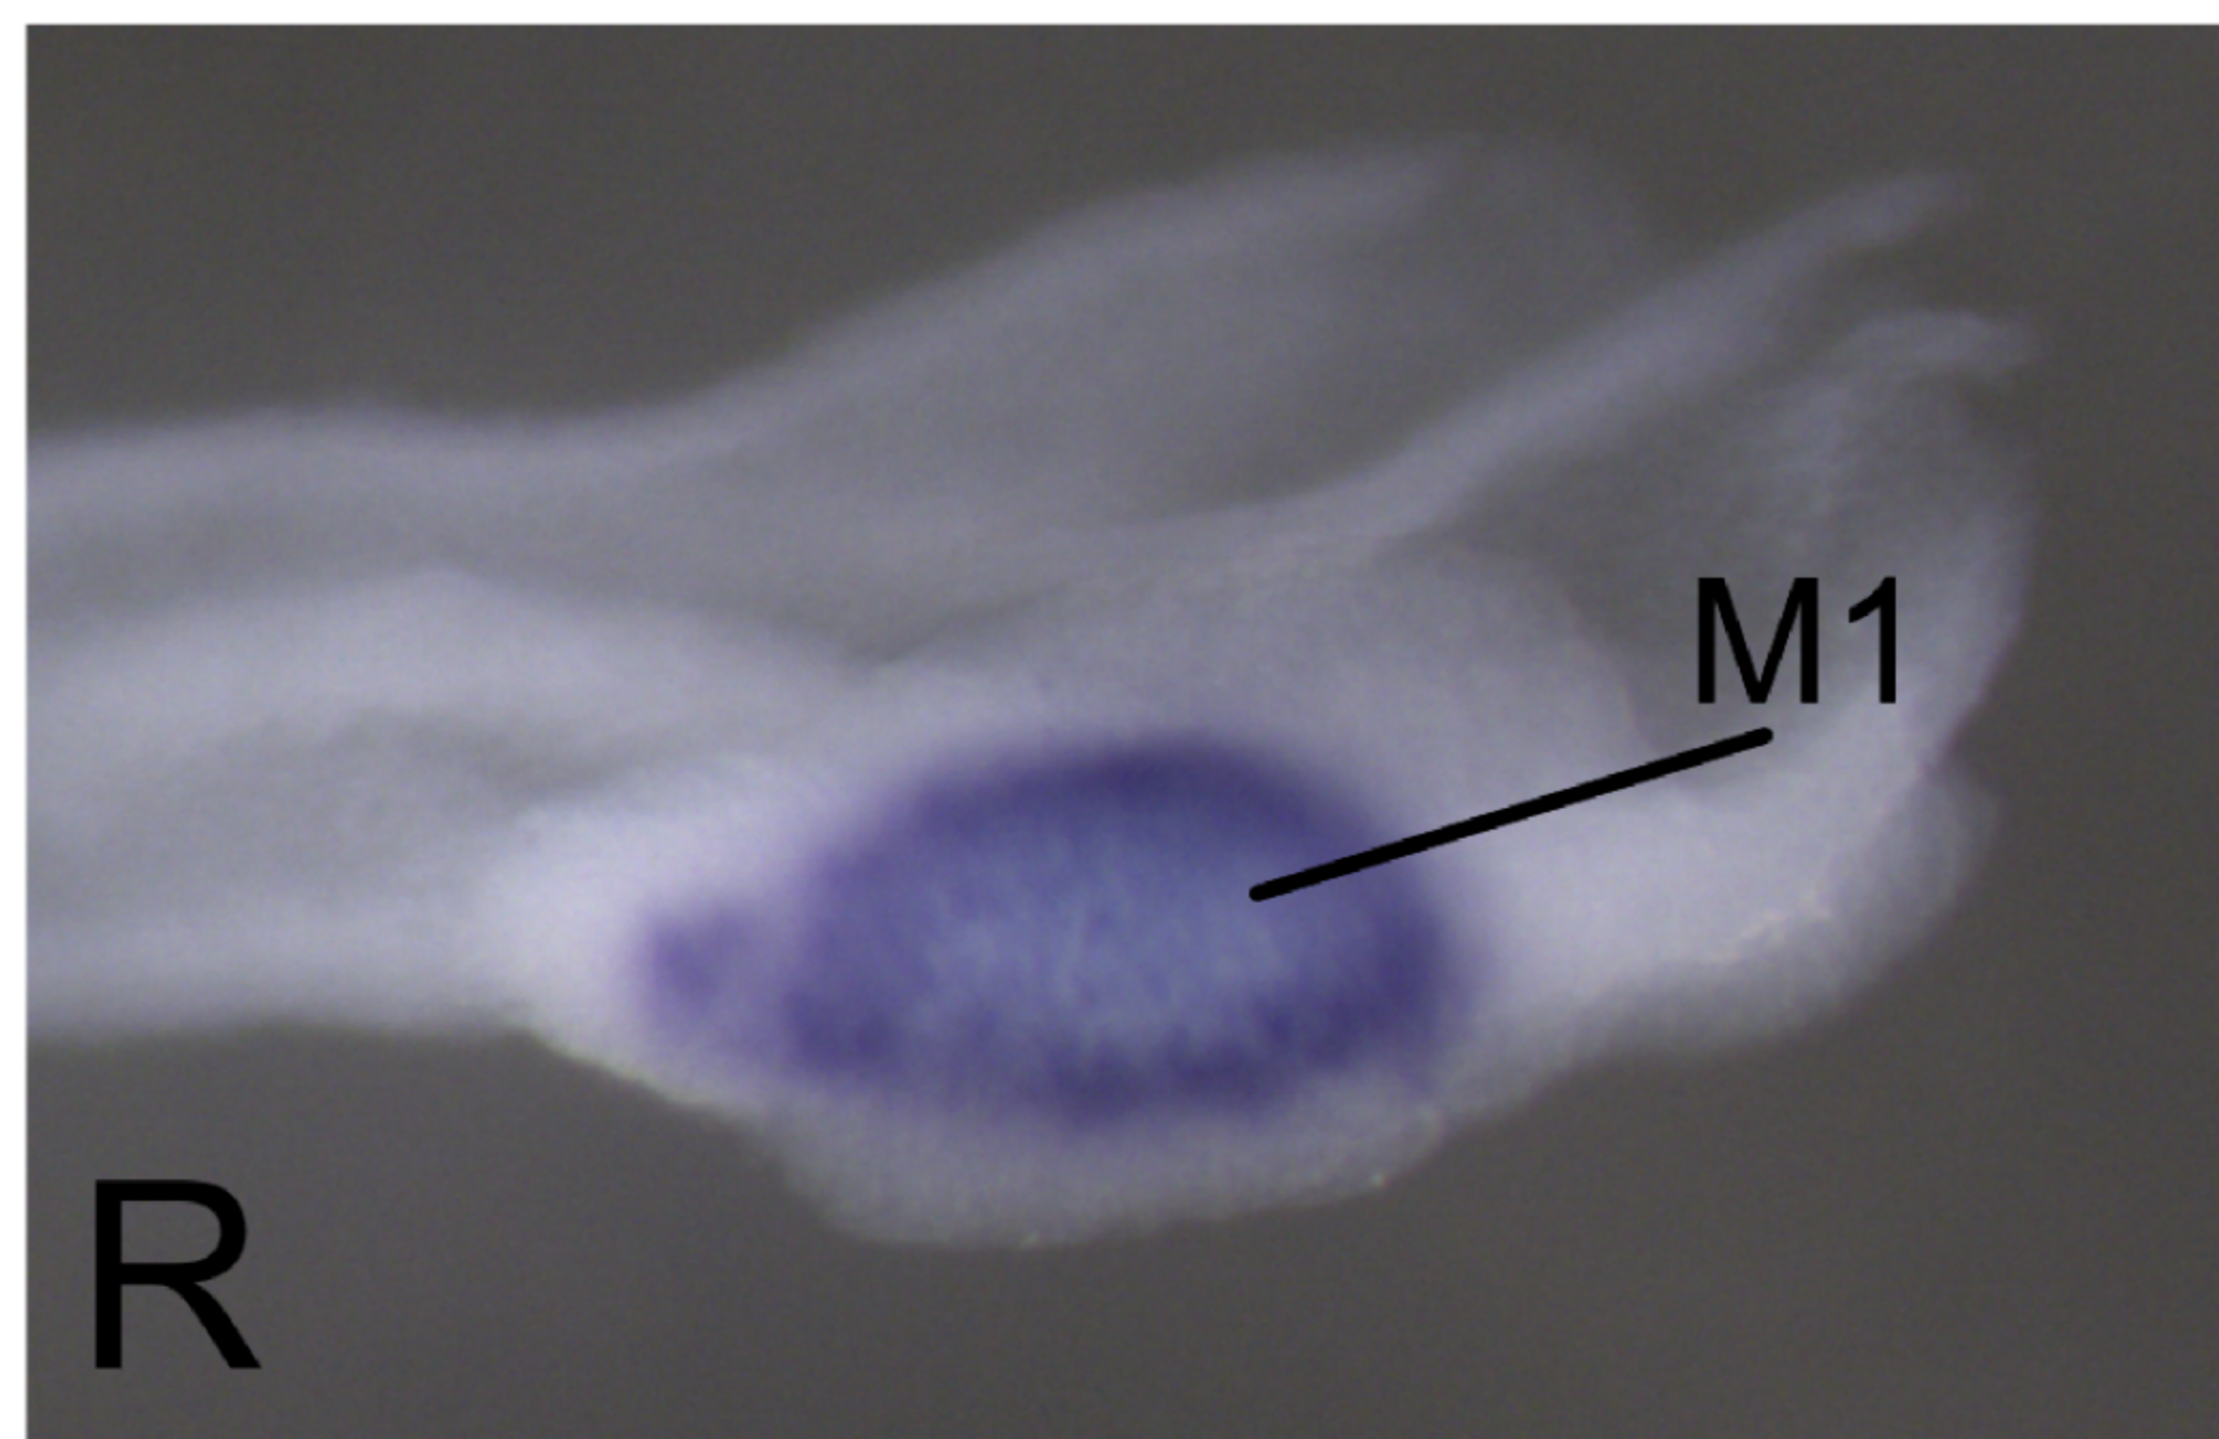

R

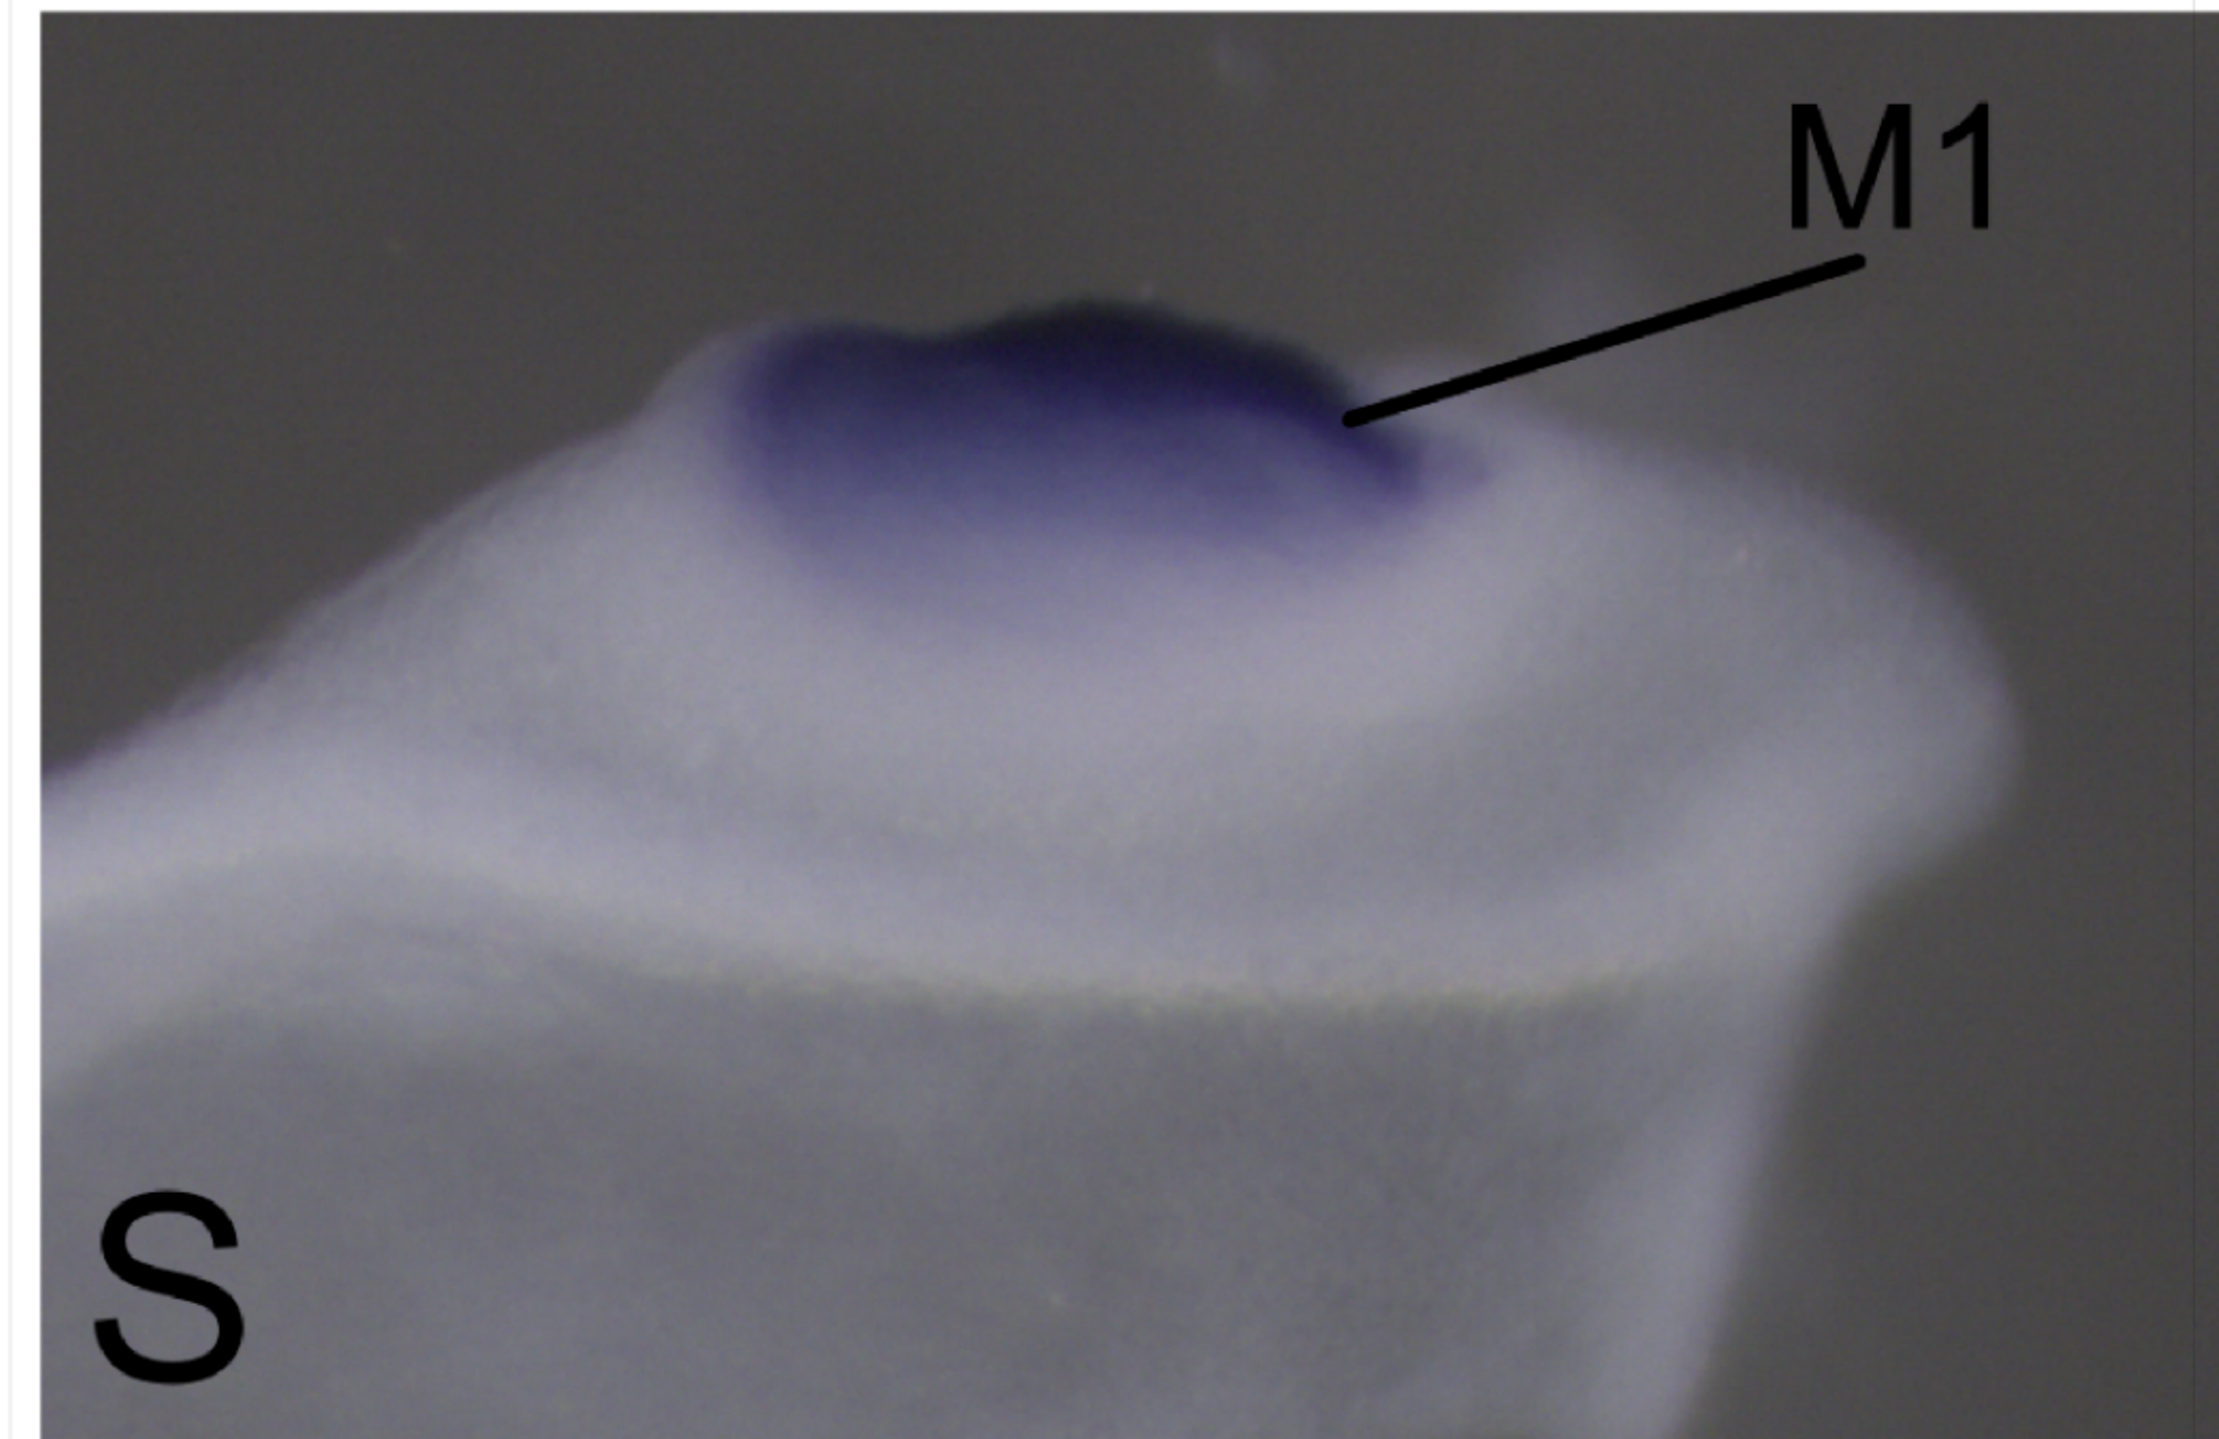

241mg

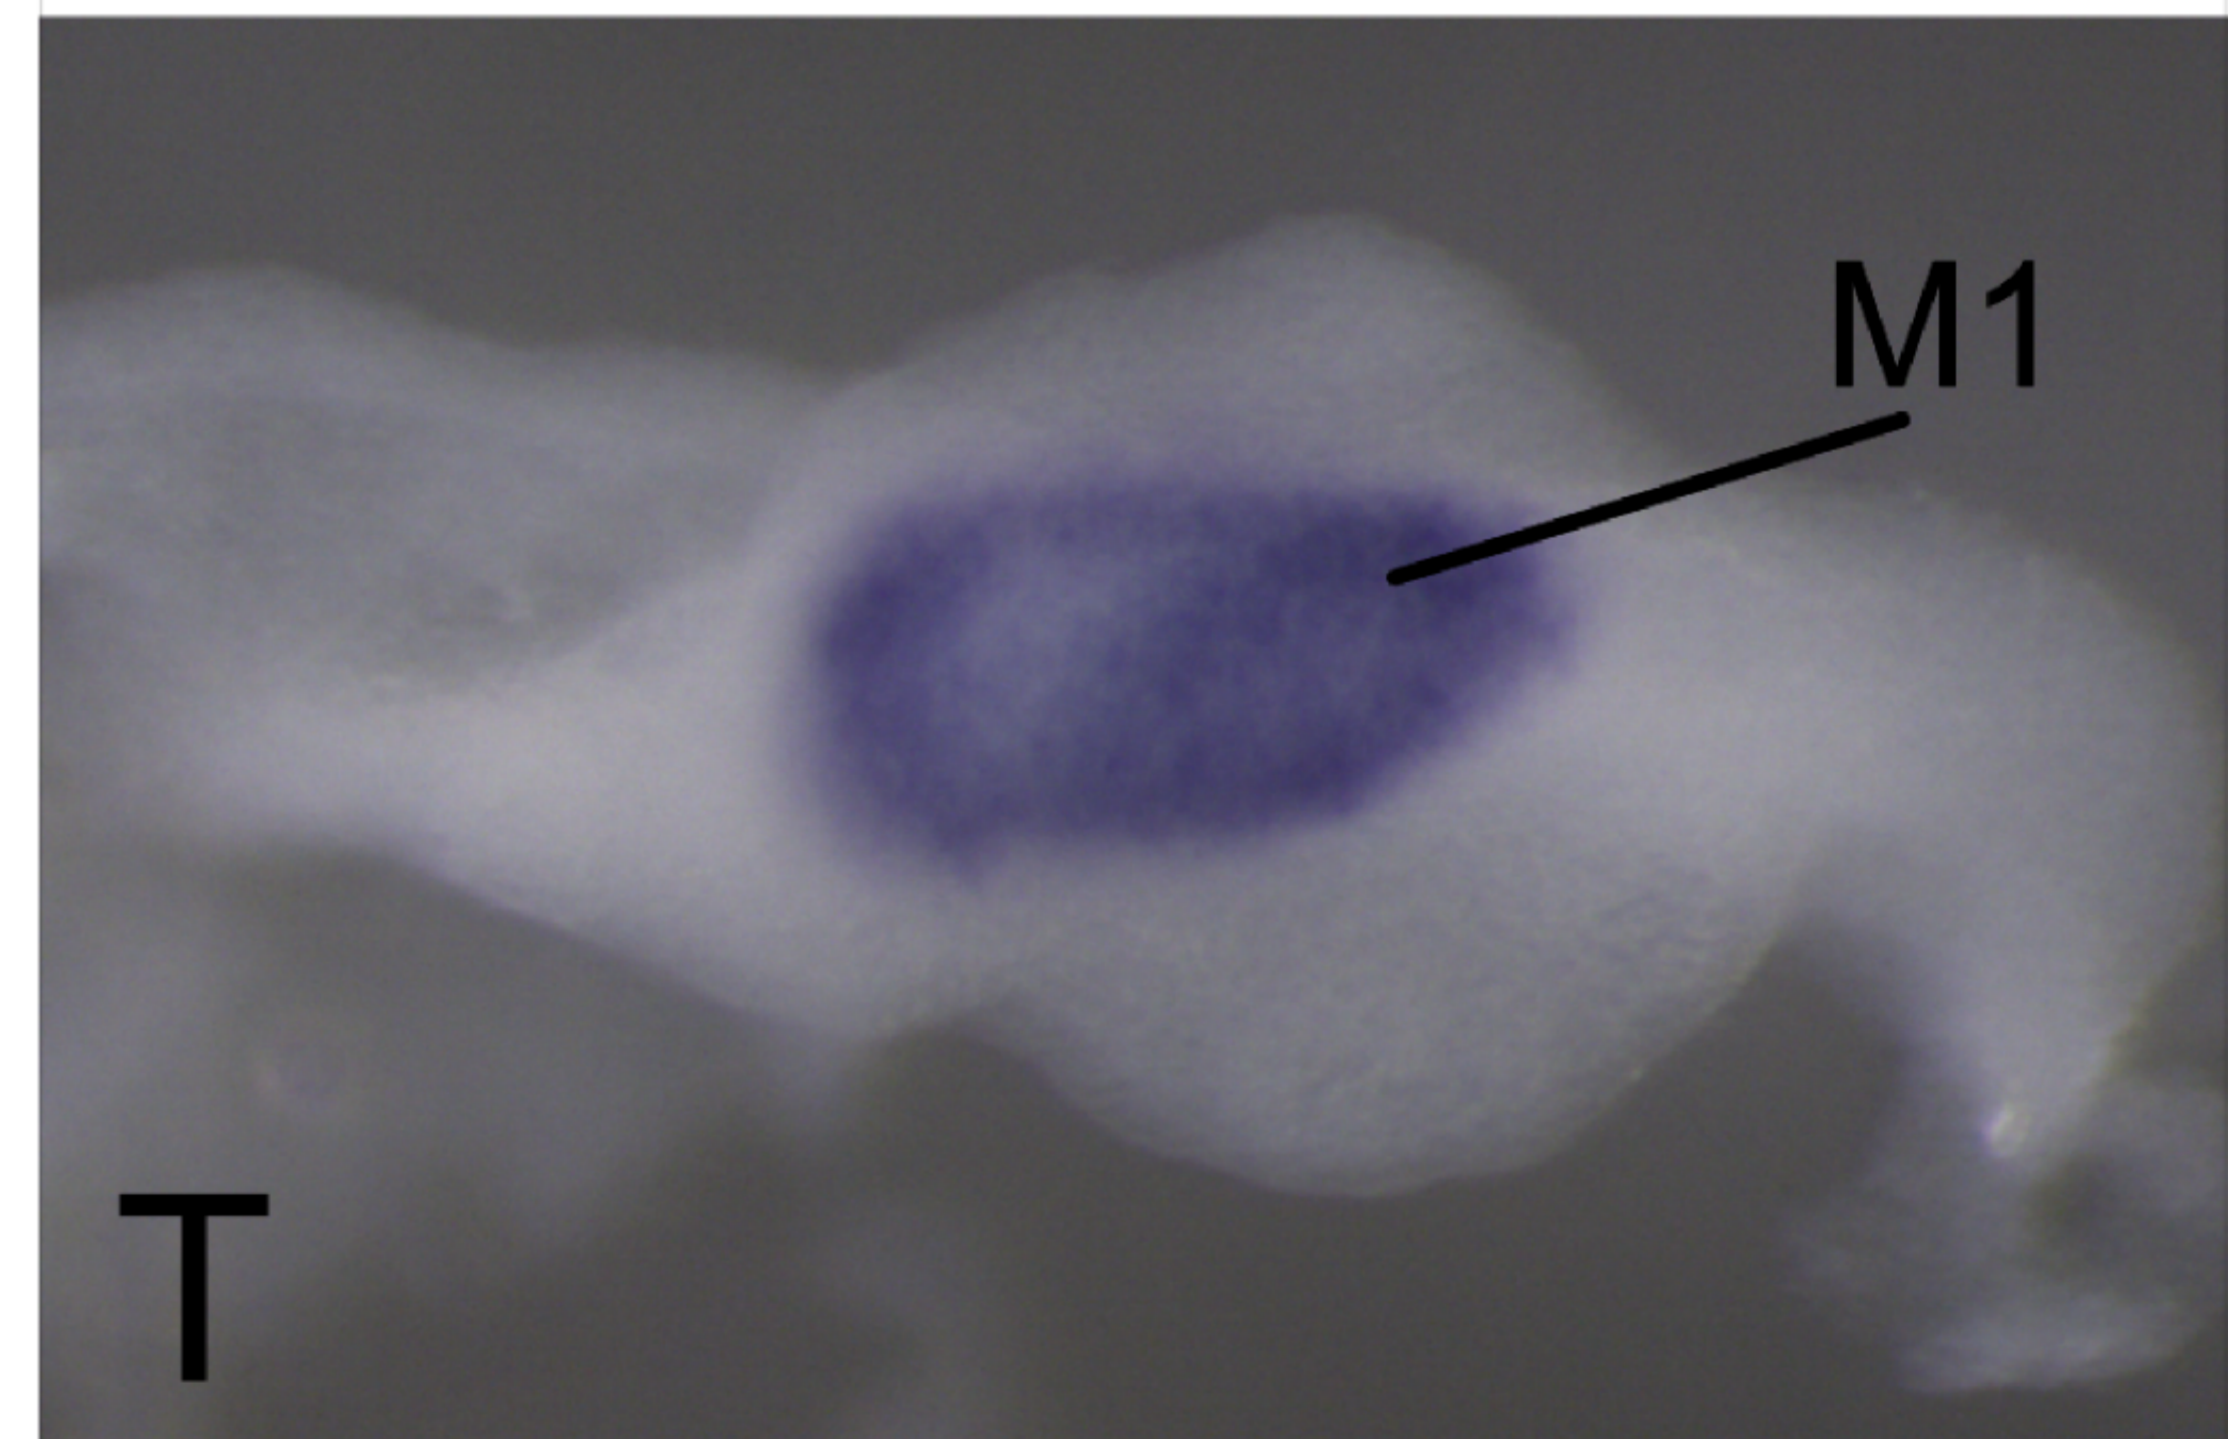

T

200  $\mu$ m

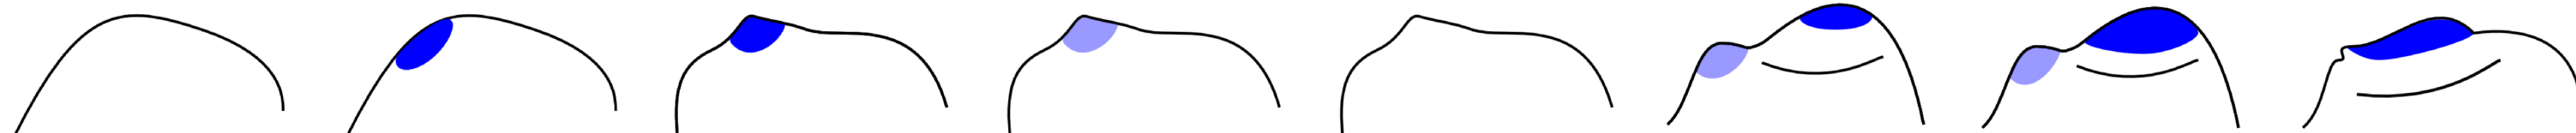

DUHi series

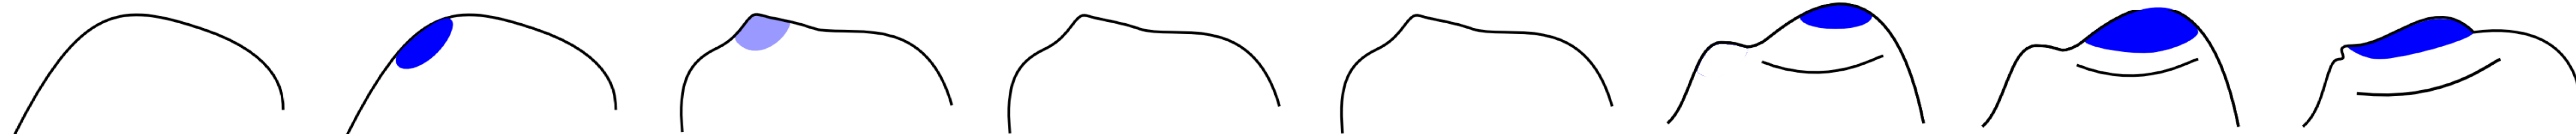

FVB series

U

Anterior

Posterior
