# Supplementary figures and images for: Developmental variability channels mouse molar evolution
Source: eLife journal article supplement (doi:10.7554/elife.50103), 2020-02-12

A

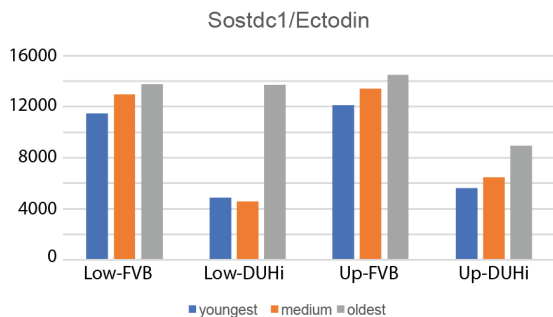

B

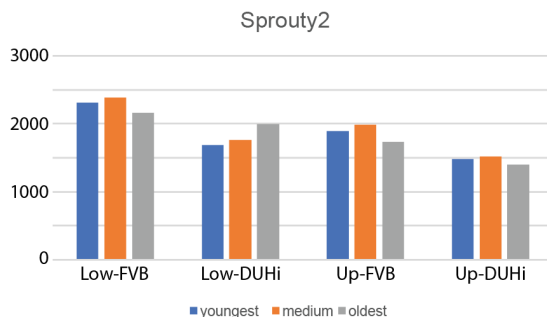

C

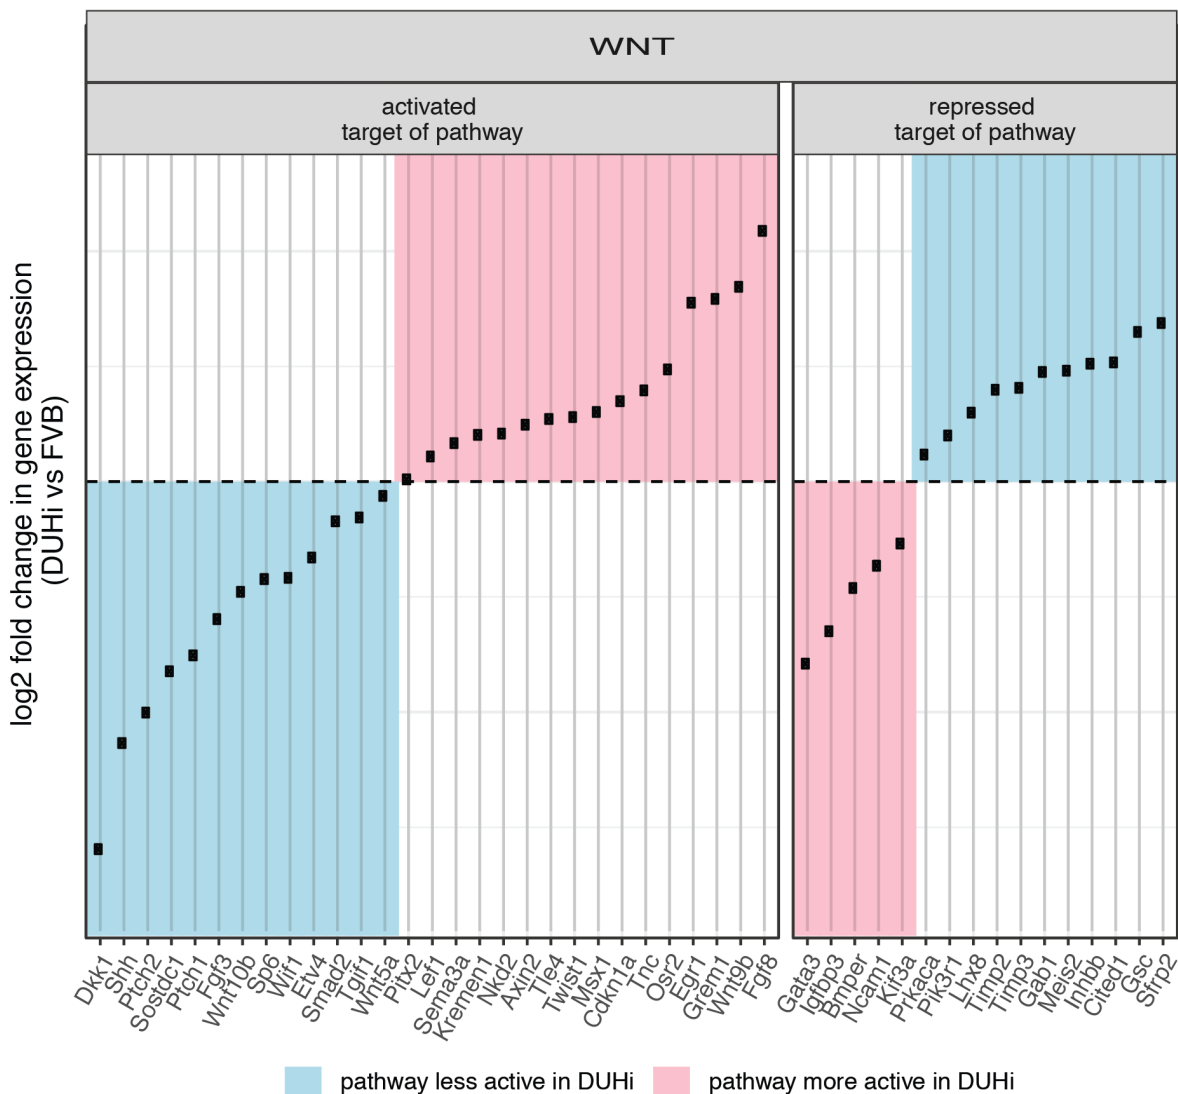

Supplement: supp [file elife-50103-supp-v1.zip › elife_poa_e50103_Figure_4_figure_supplement_2.pdf]

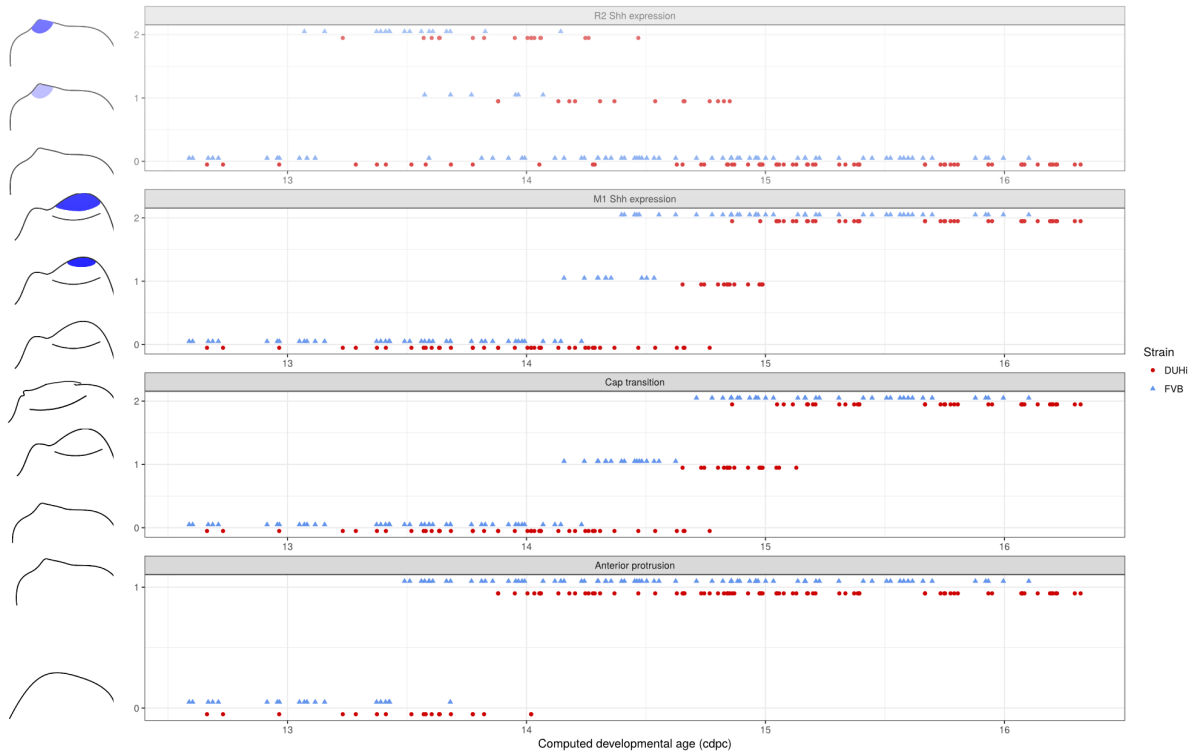

Supplement: supp [file elife-50103-supp-v1.zip › elife_poa_e50103_Figure_3_figure_supplement_2.pdf]

DUHi lower molars

13.9 cdpc

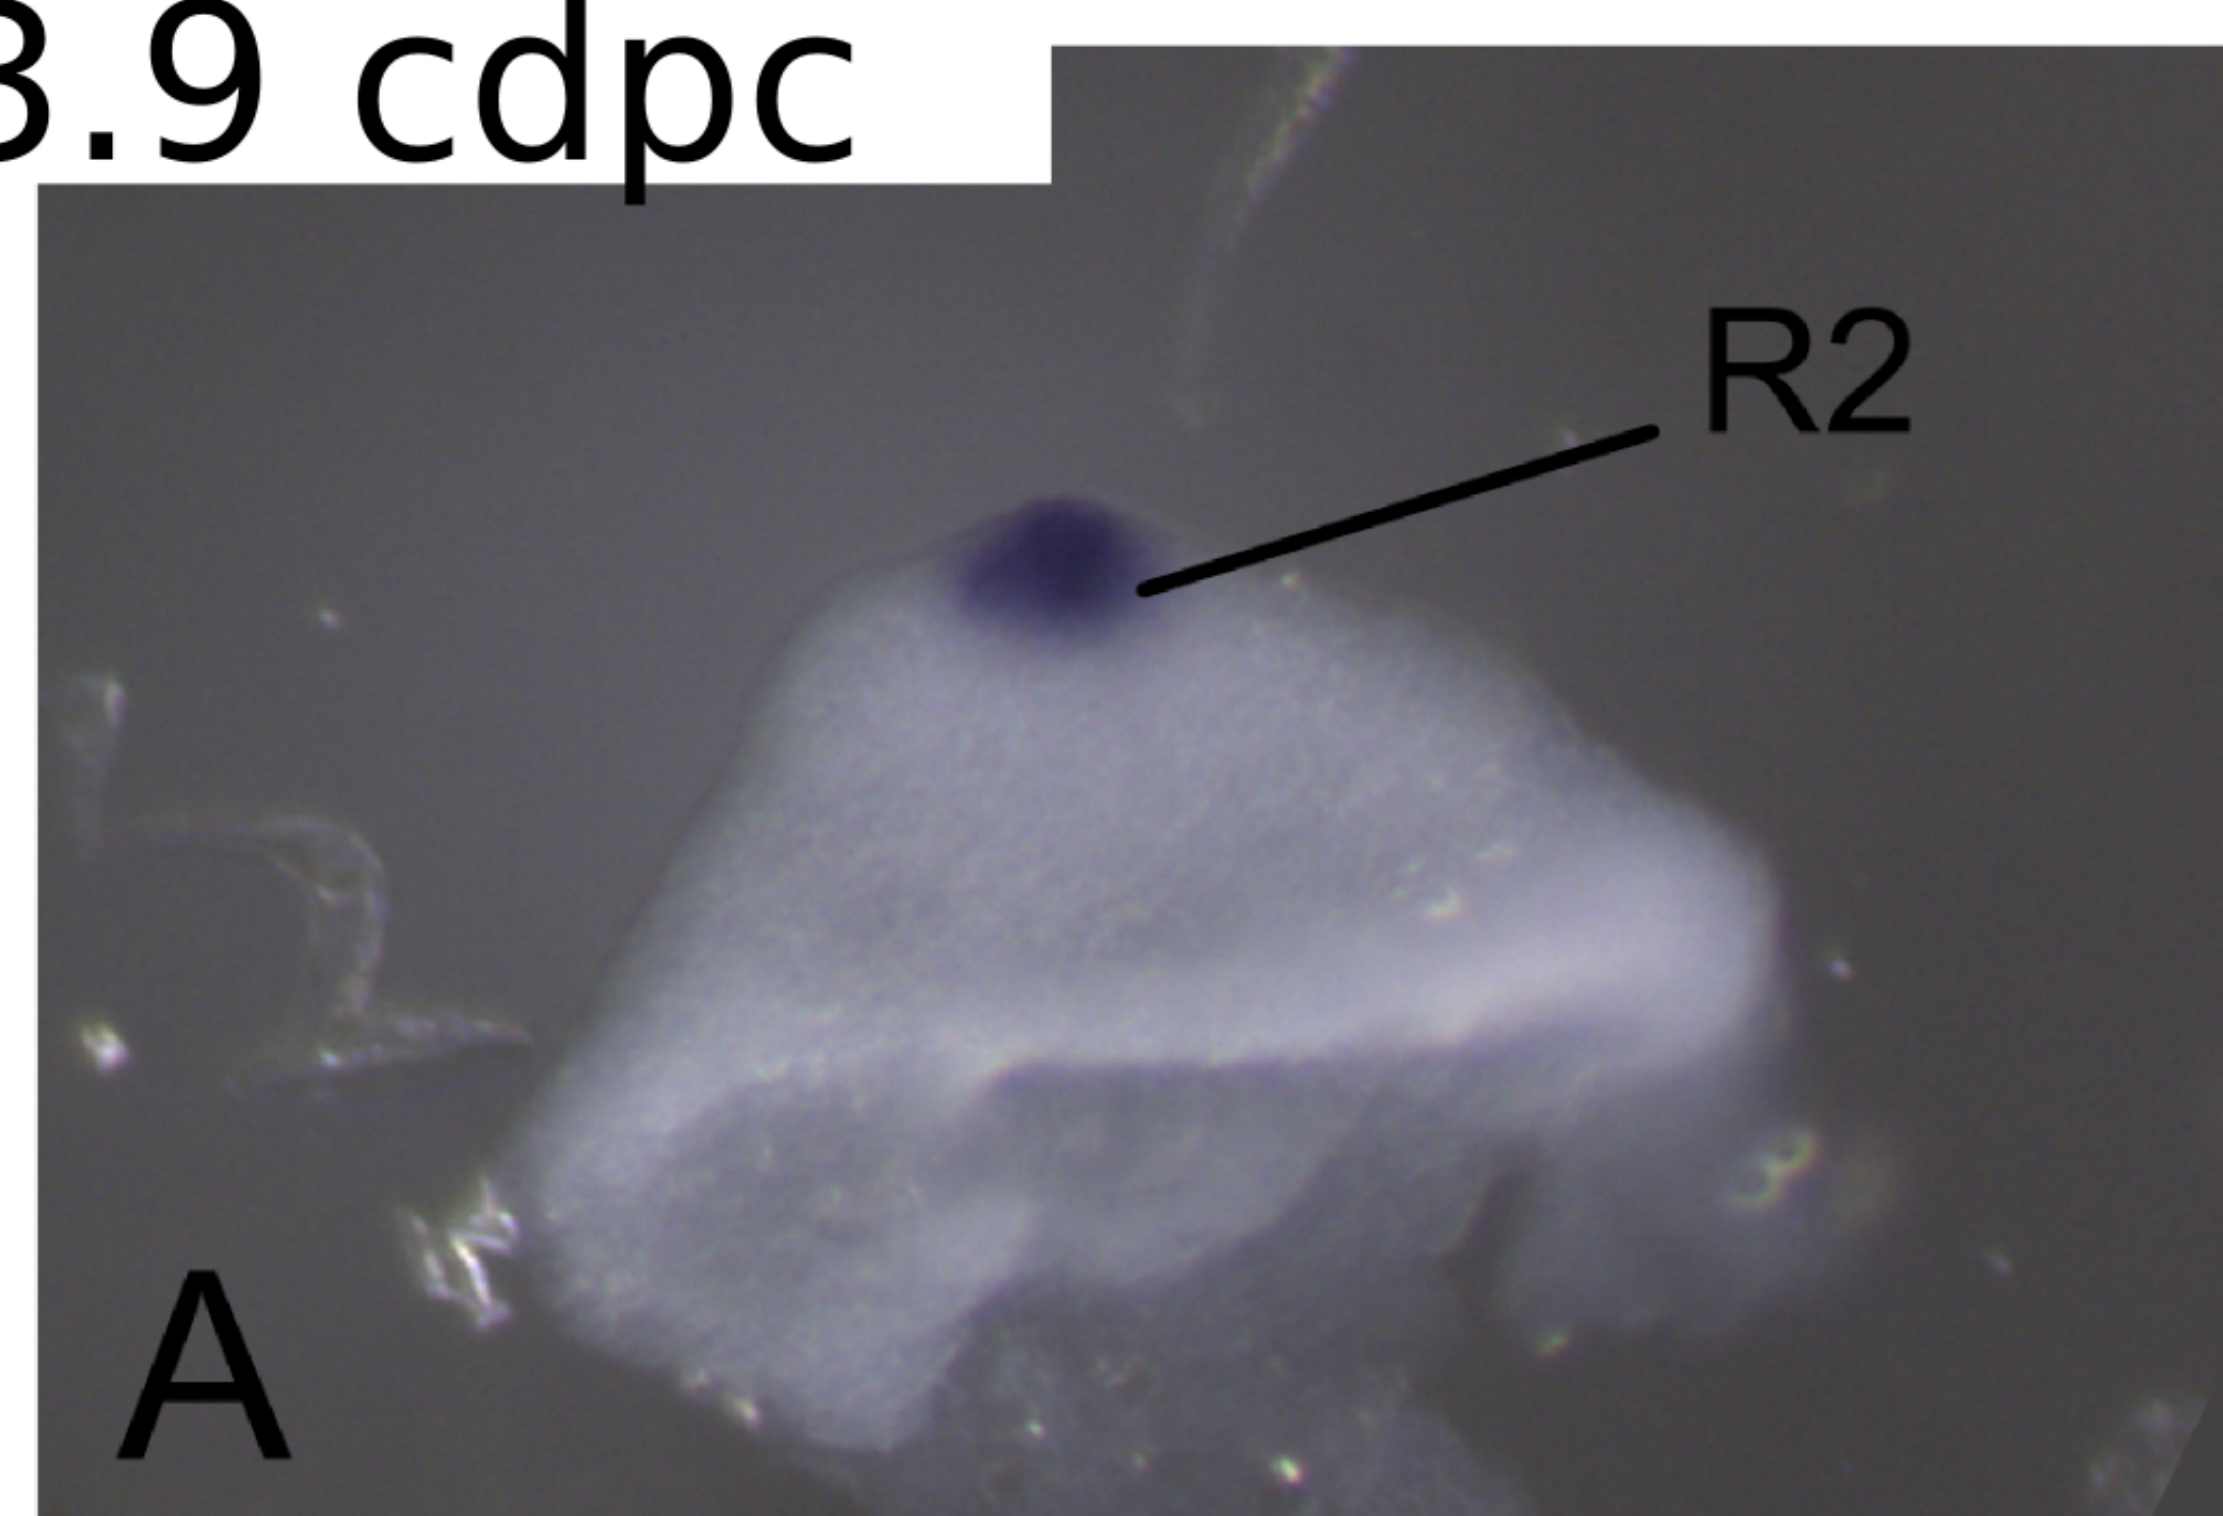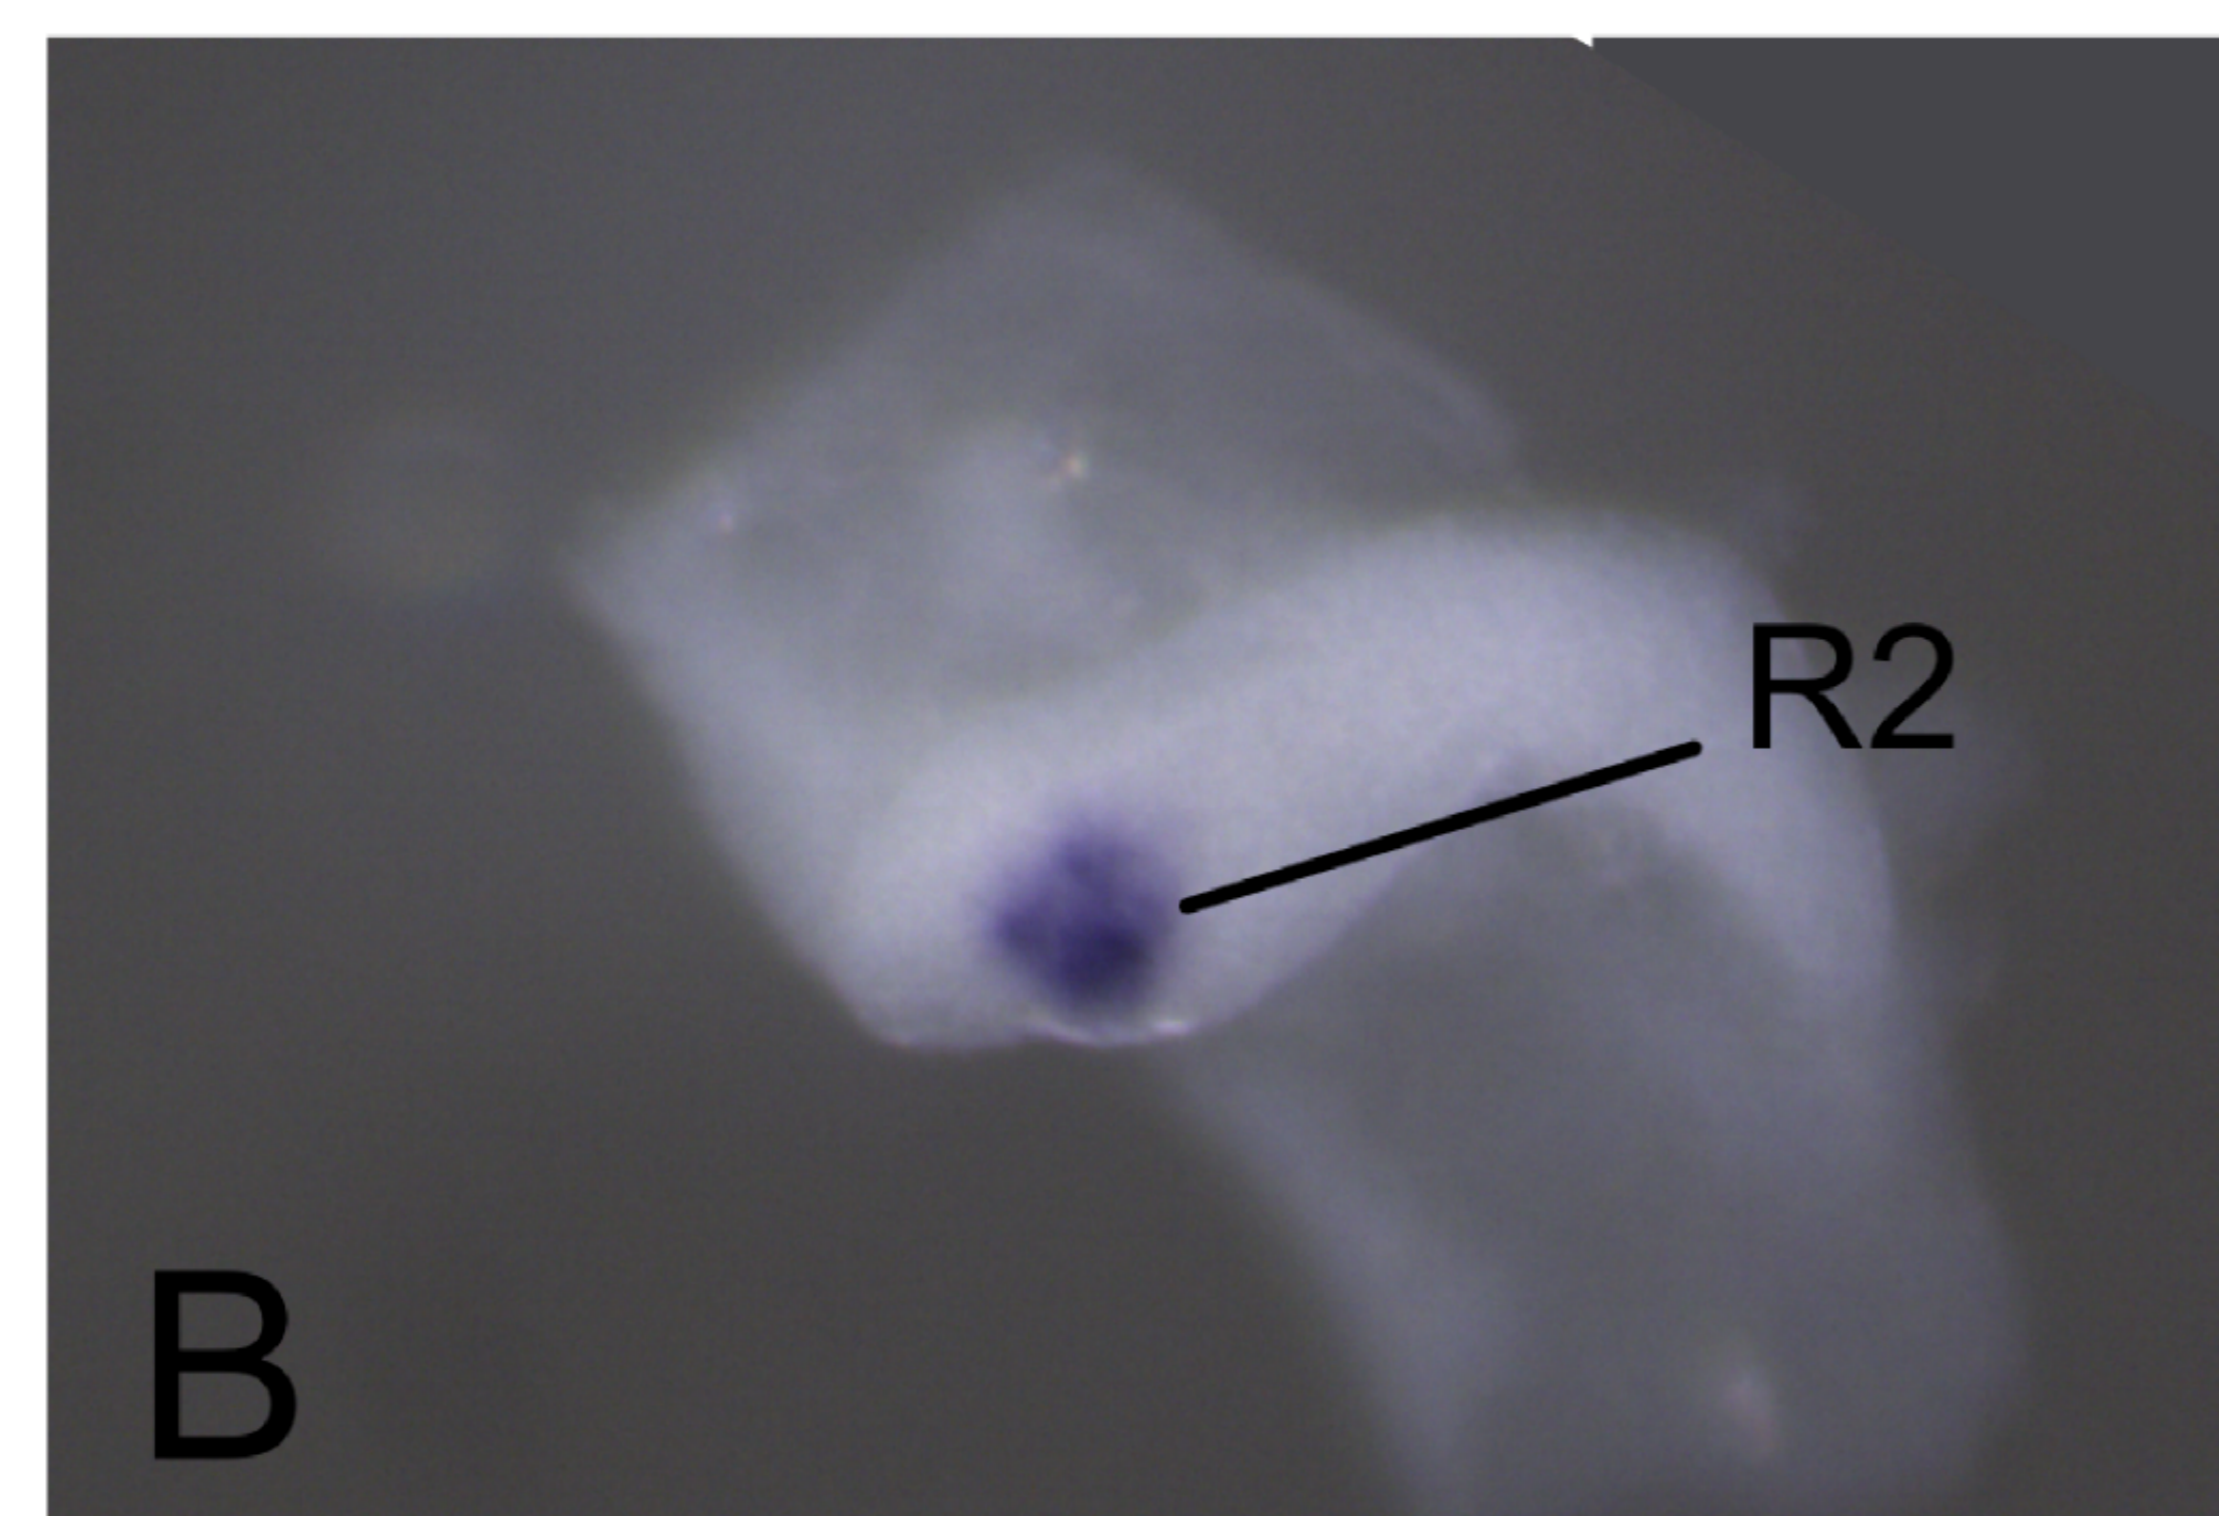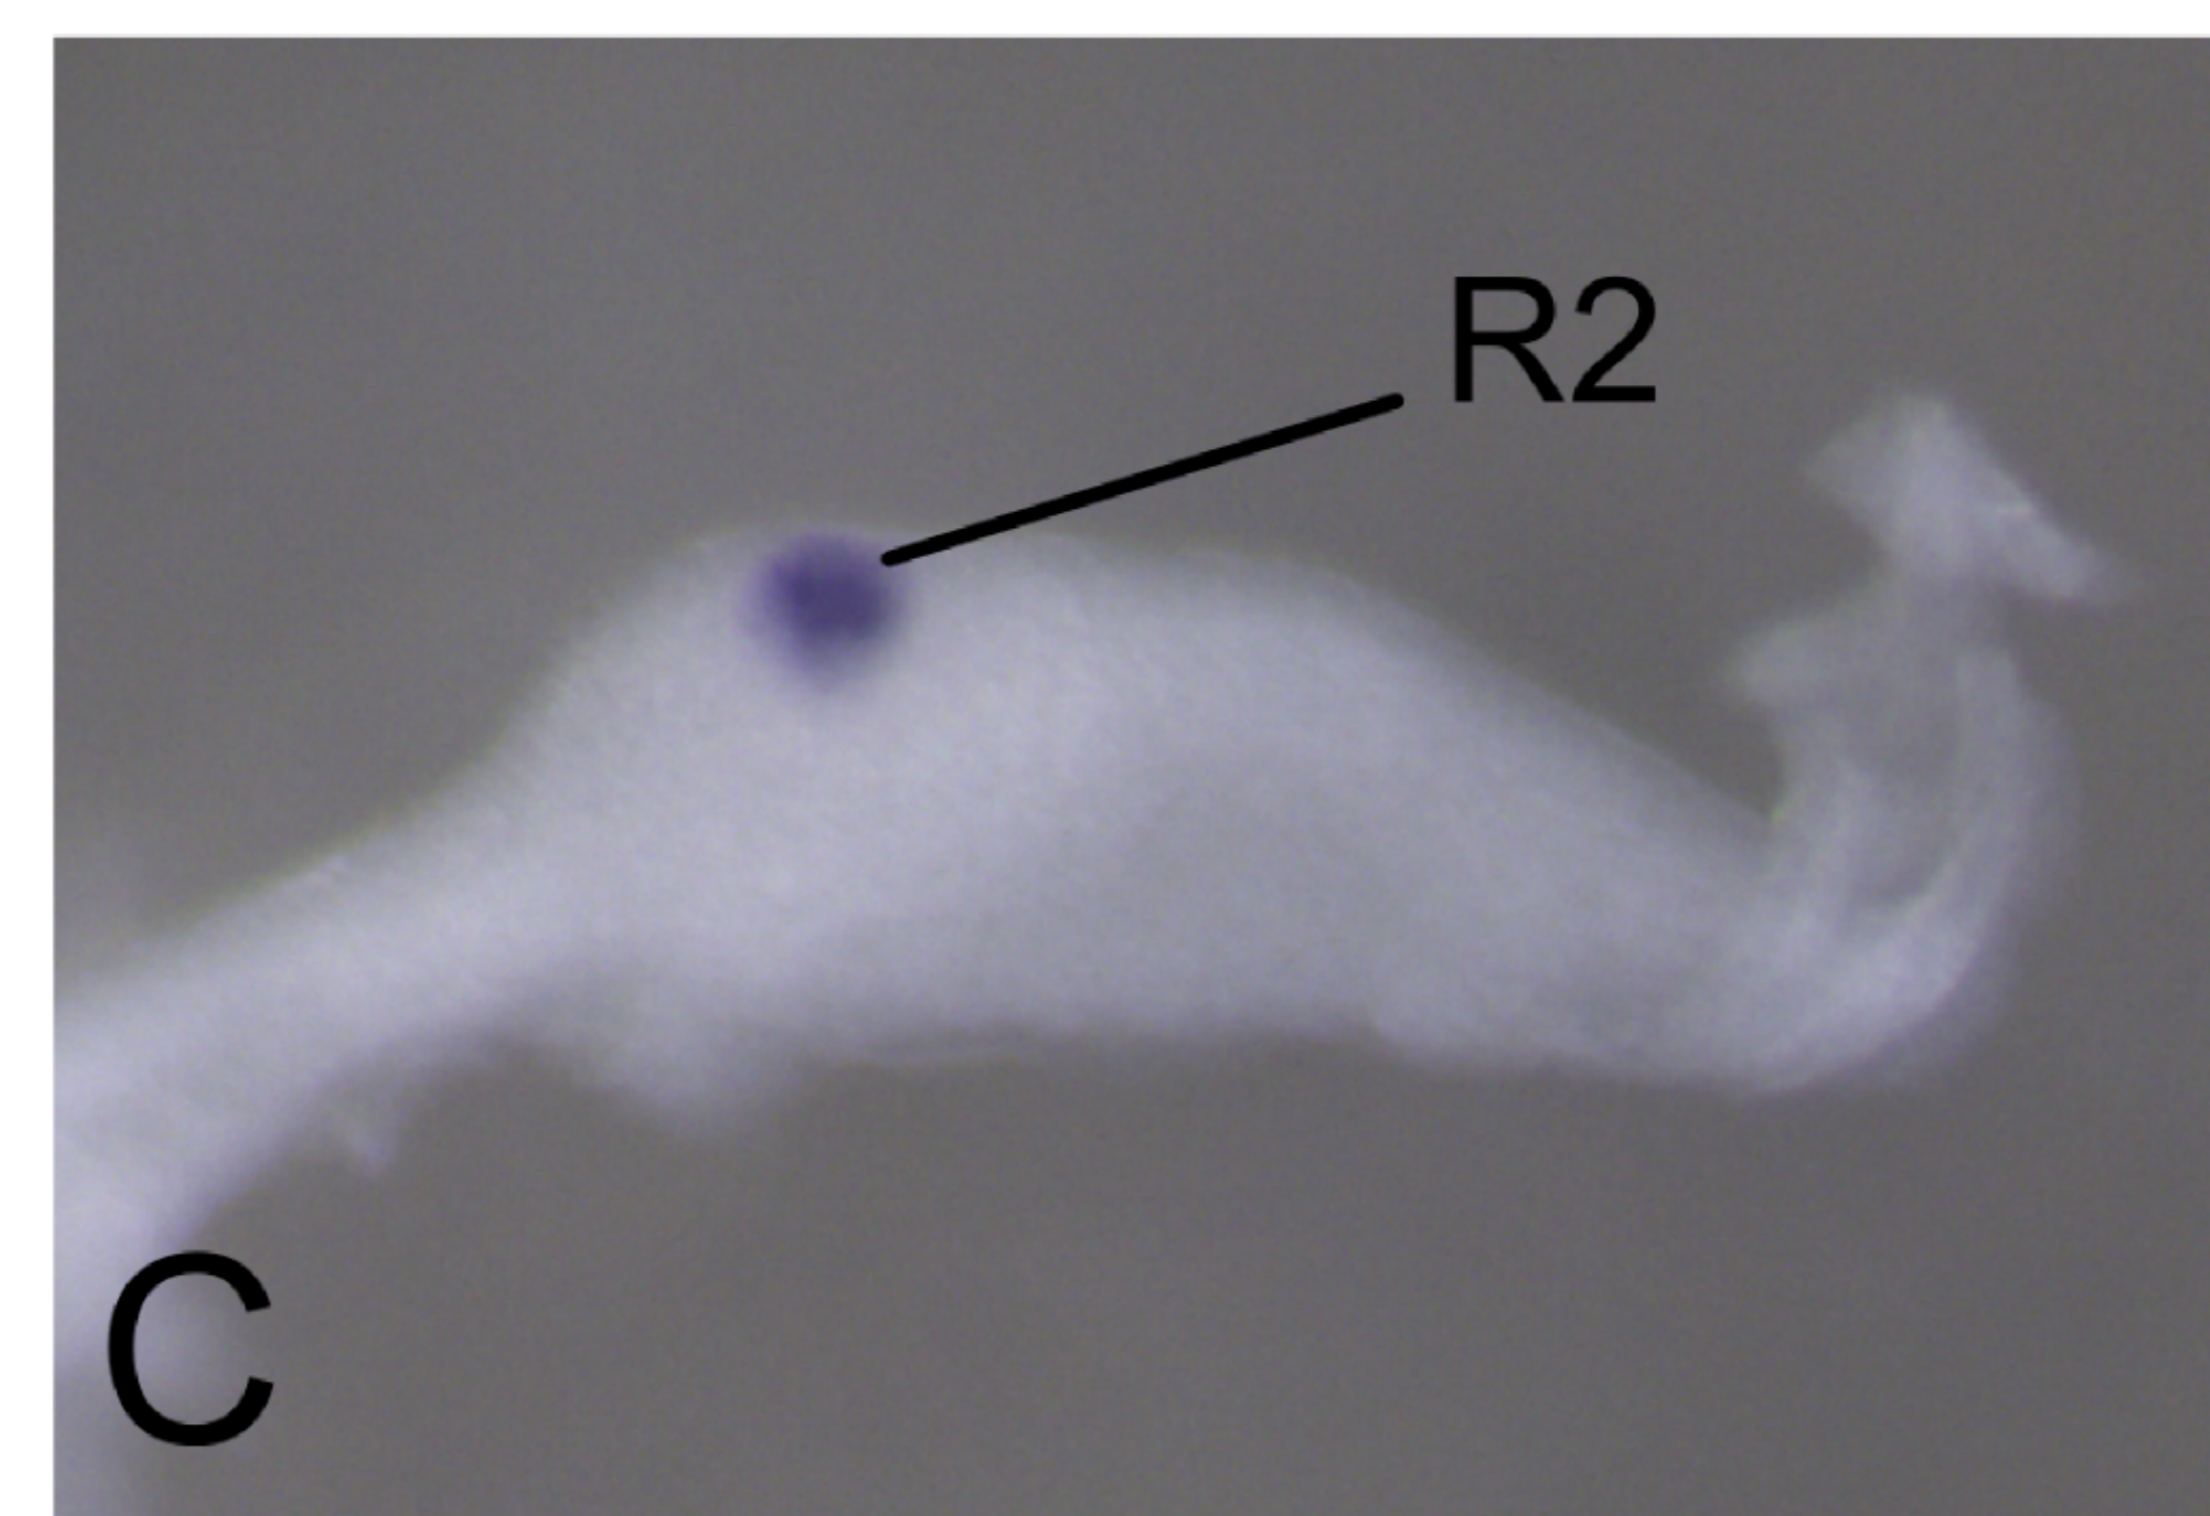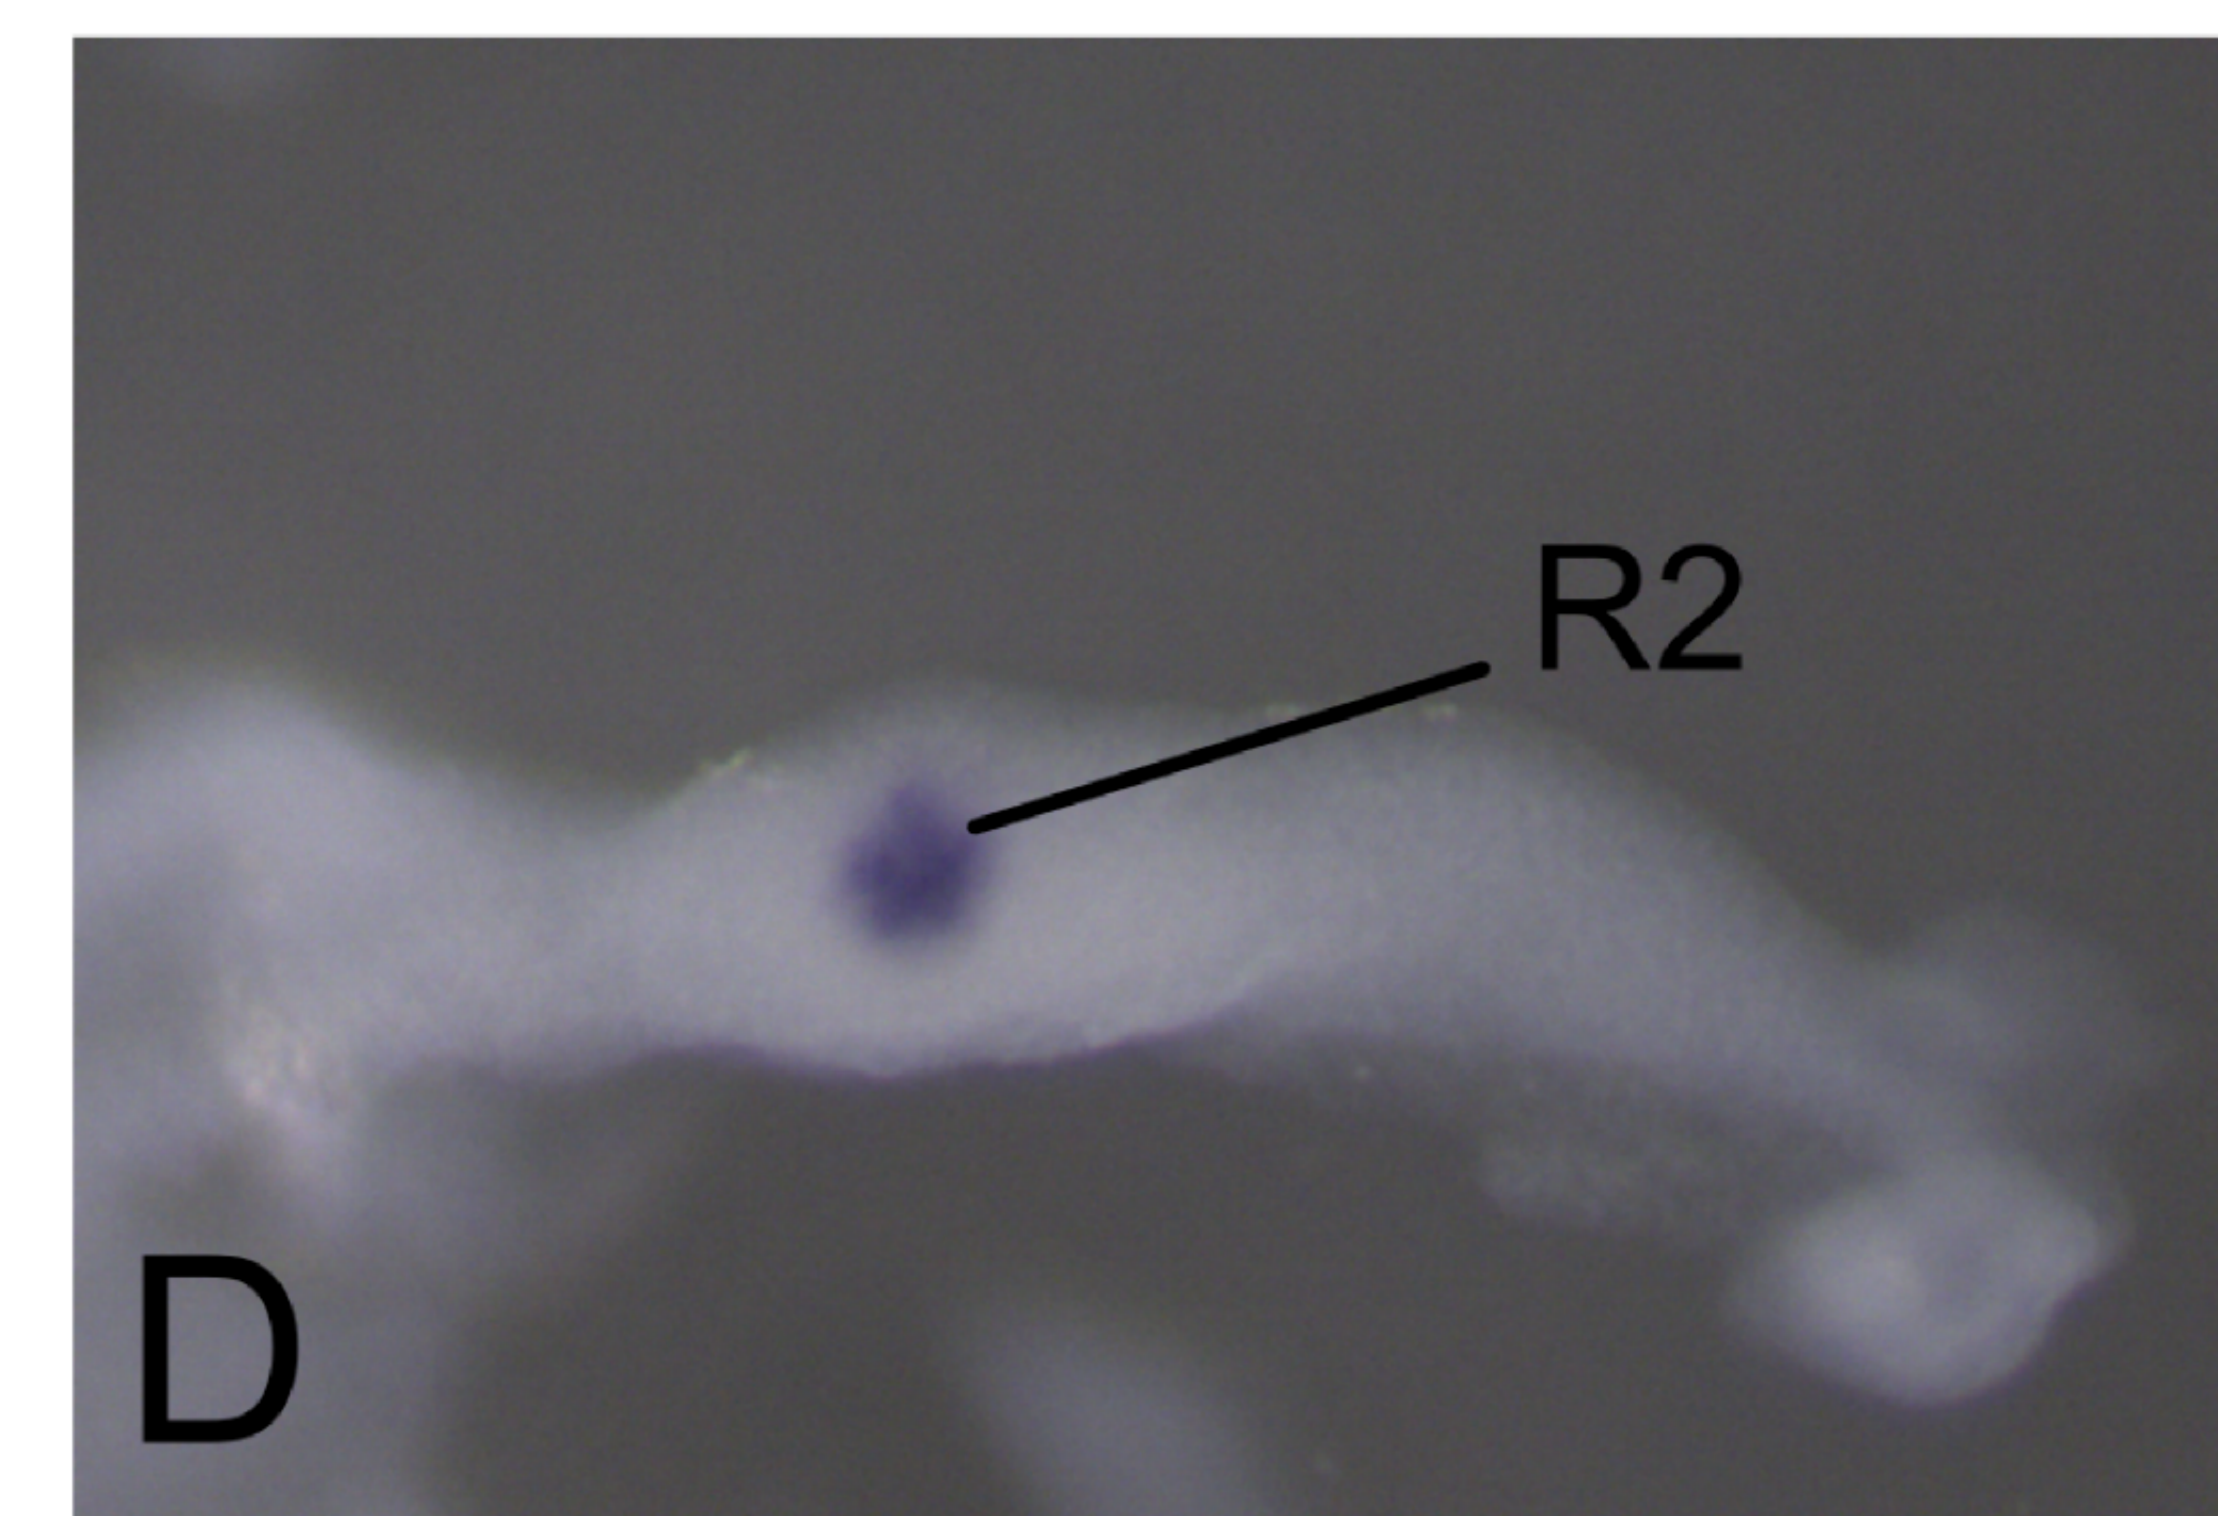

14.25 cdpc

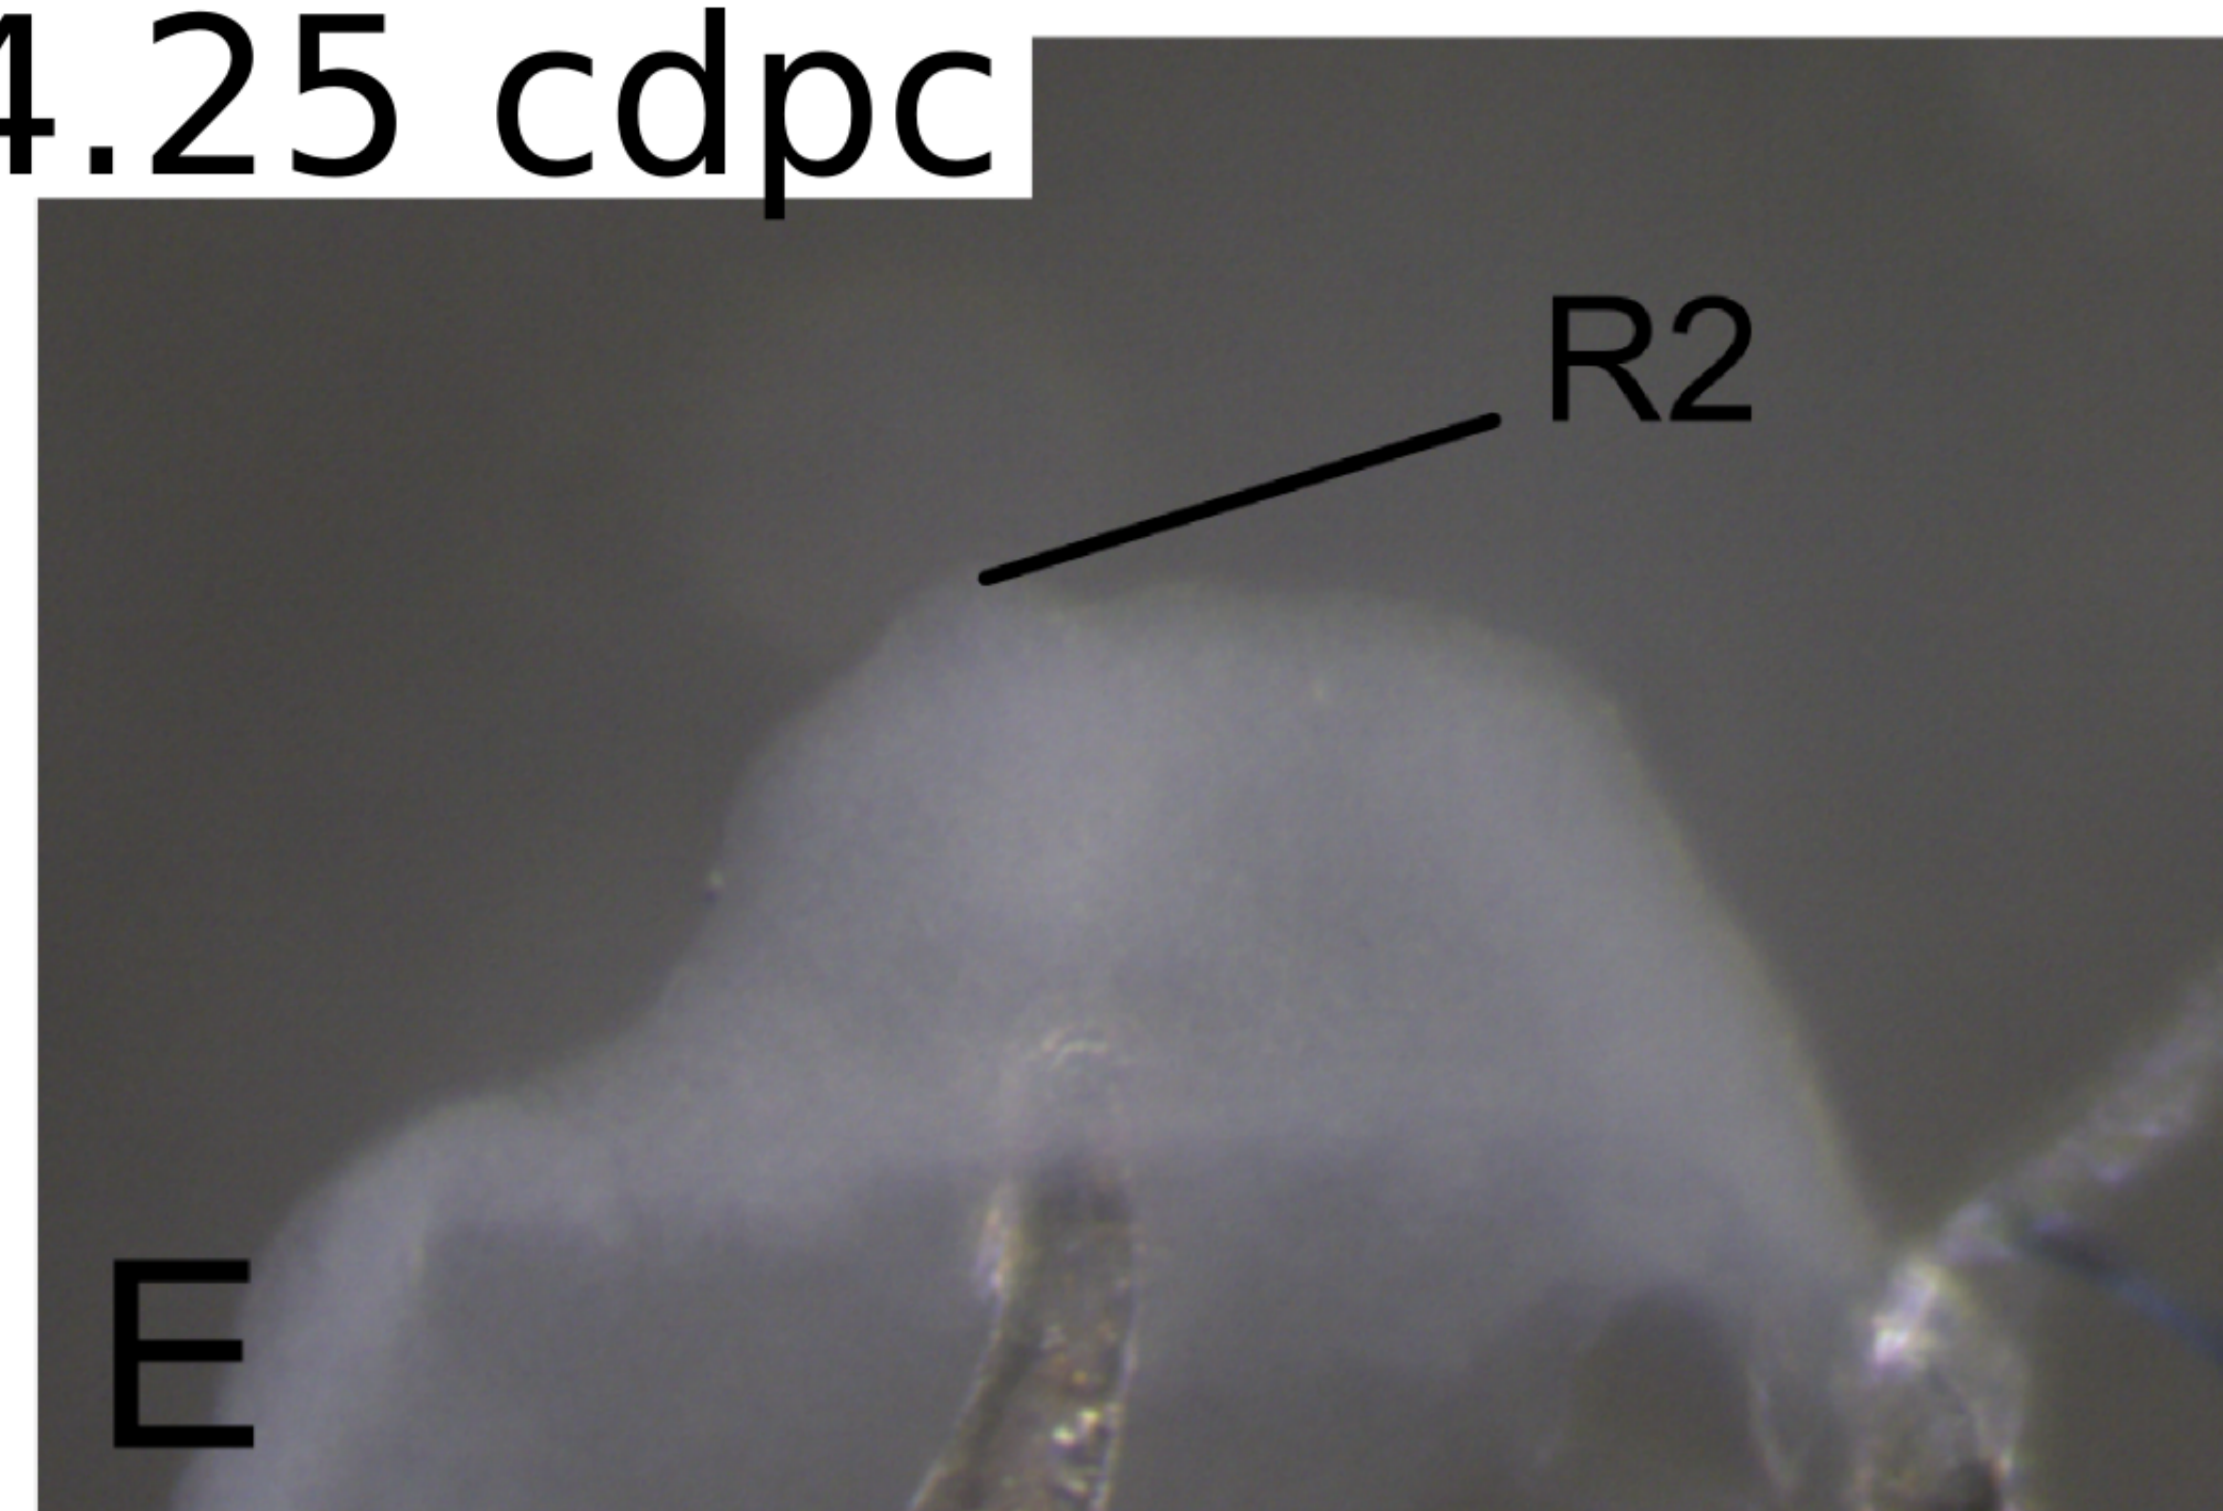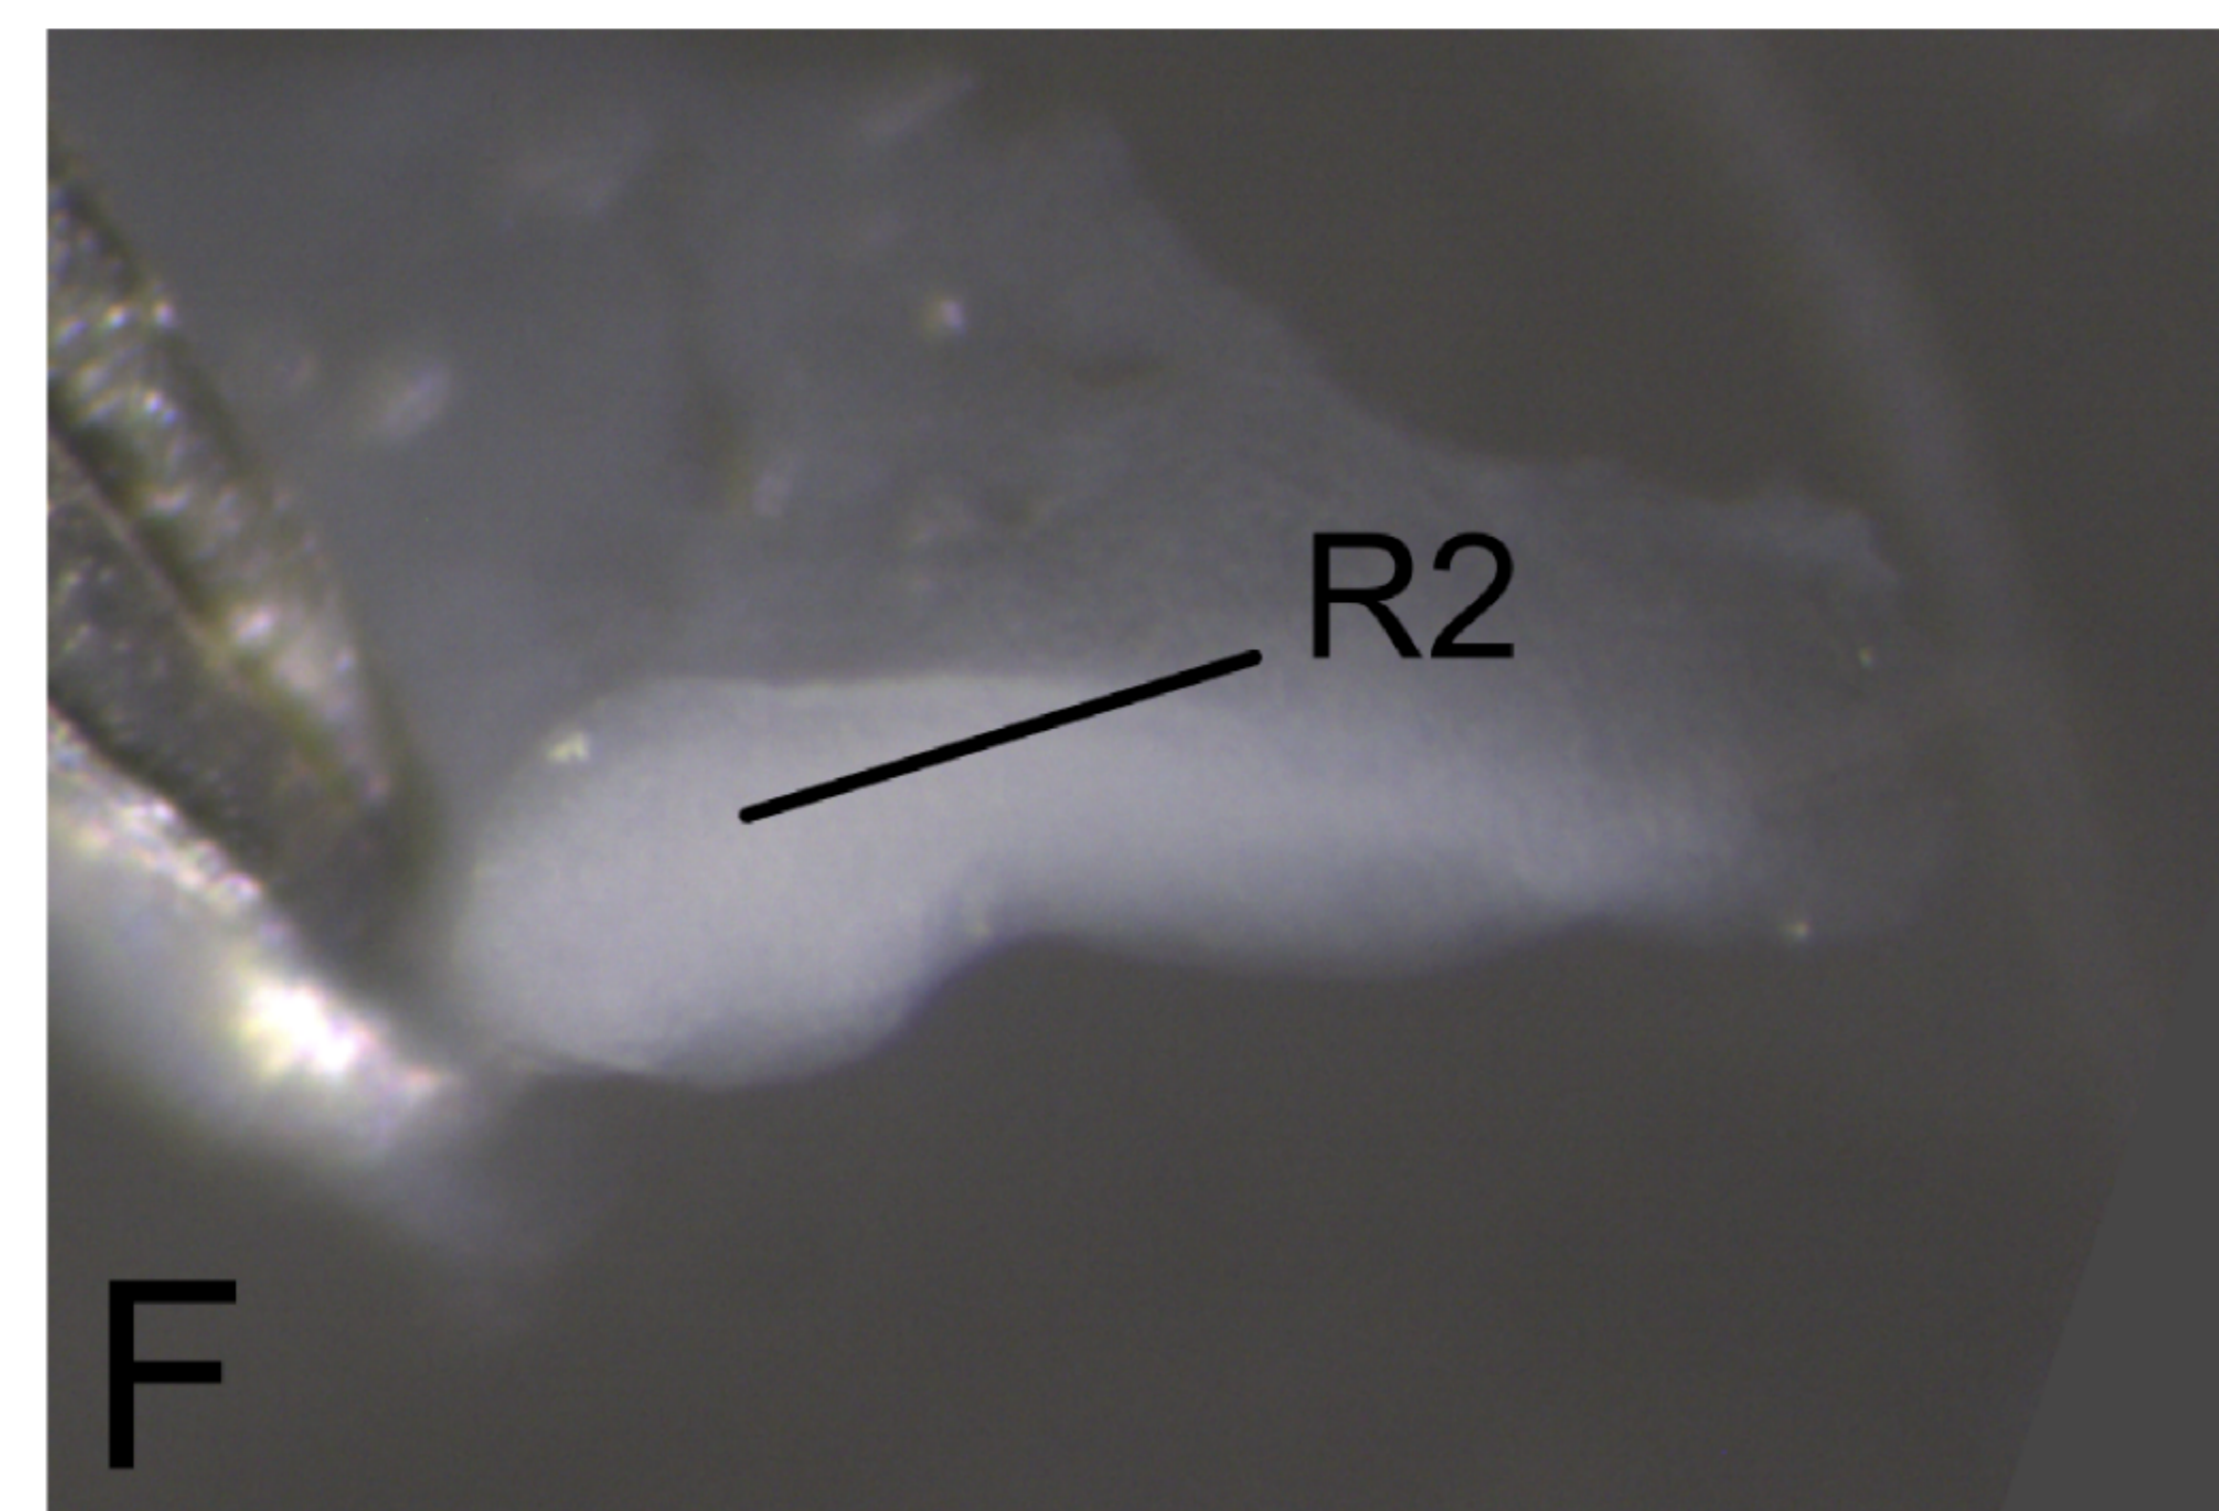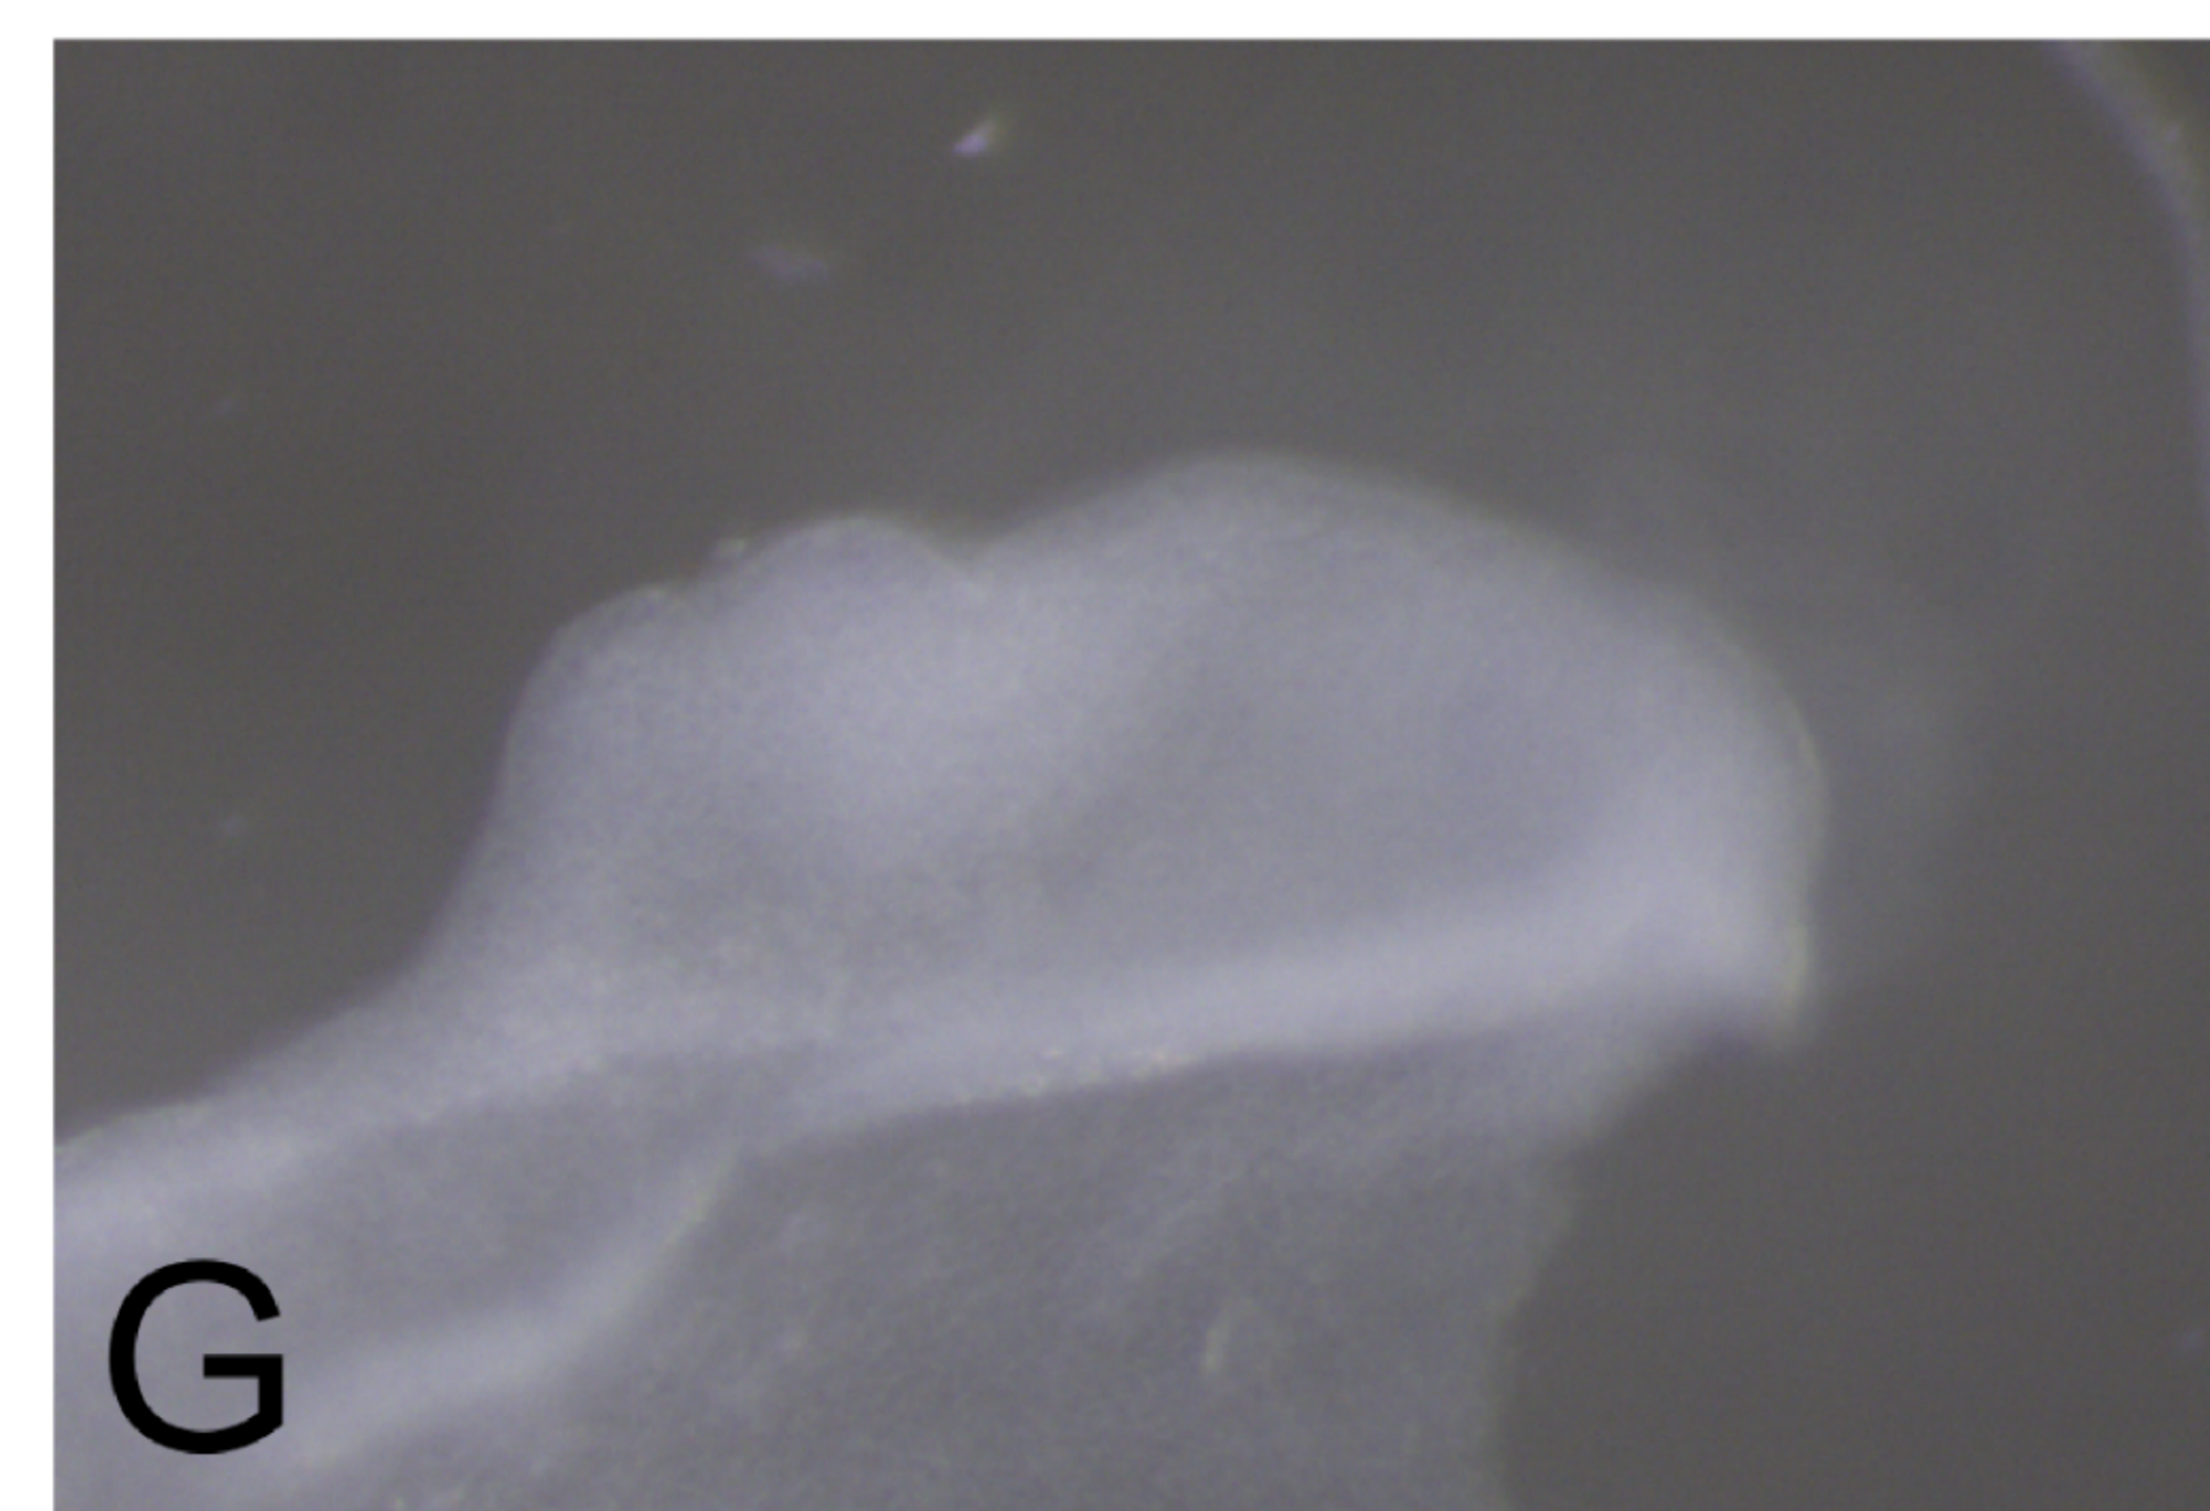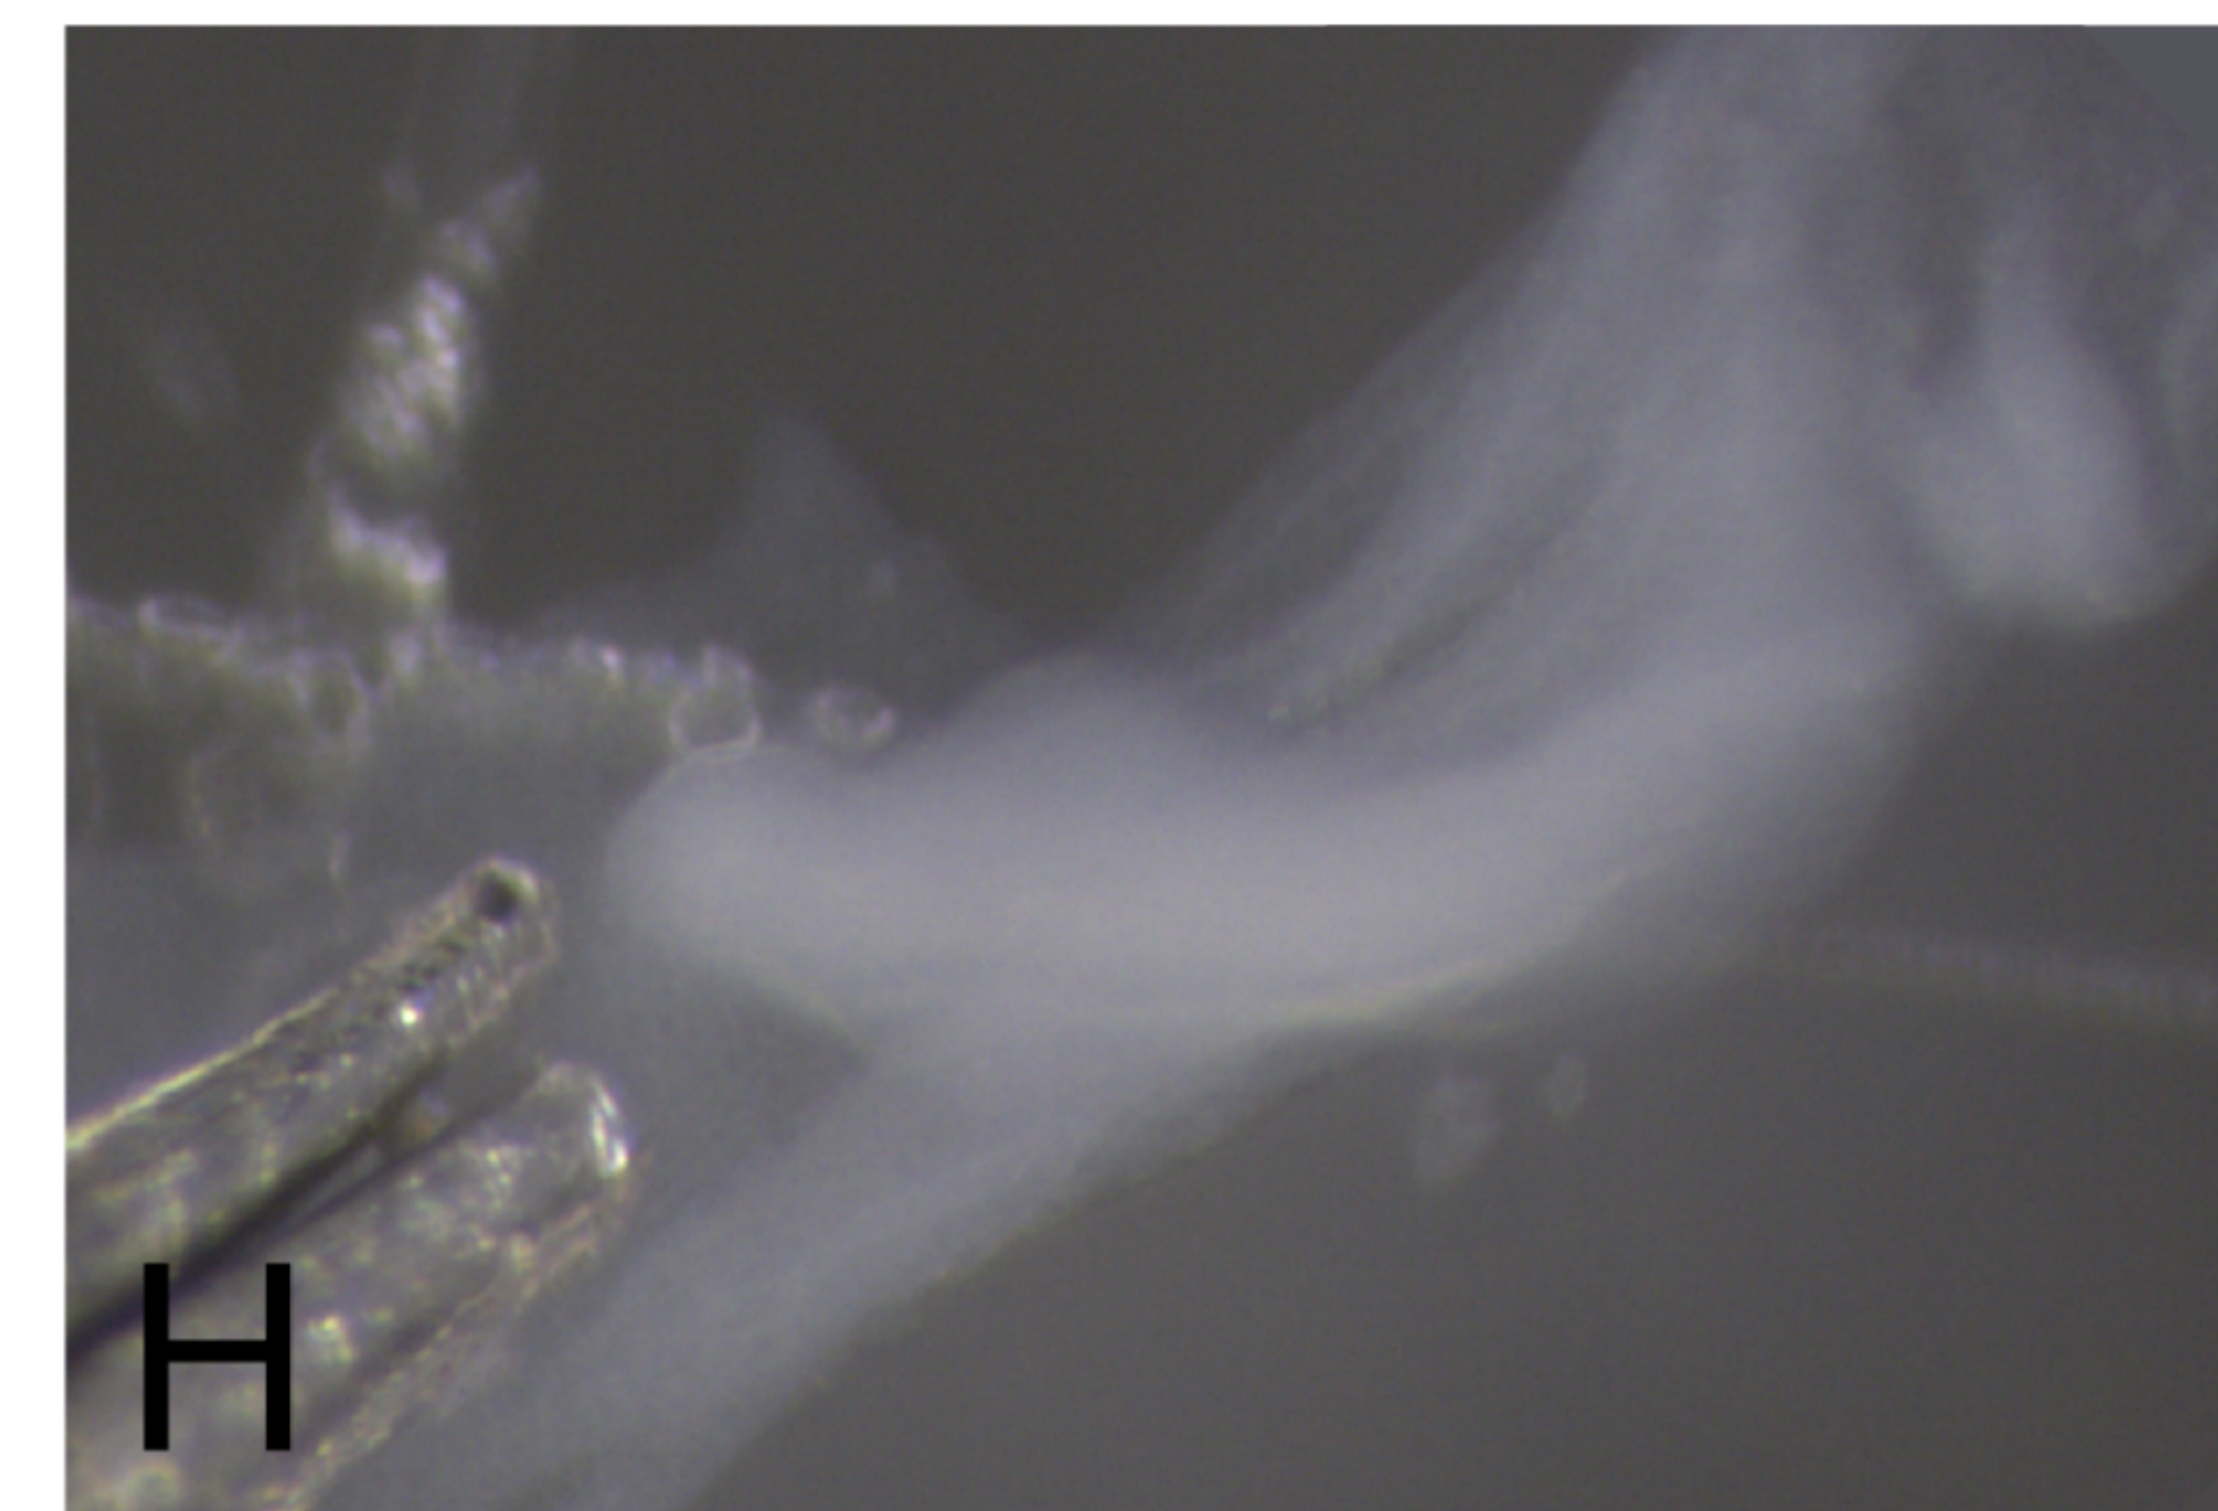

14.5 cdpc

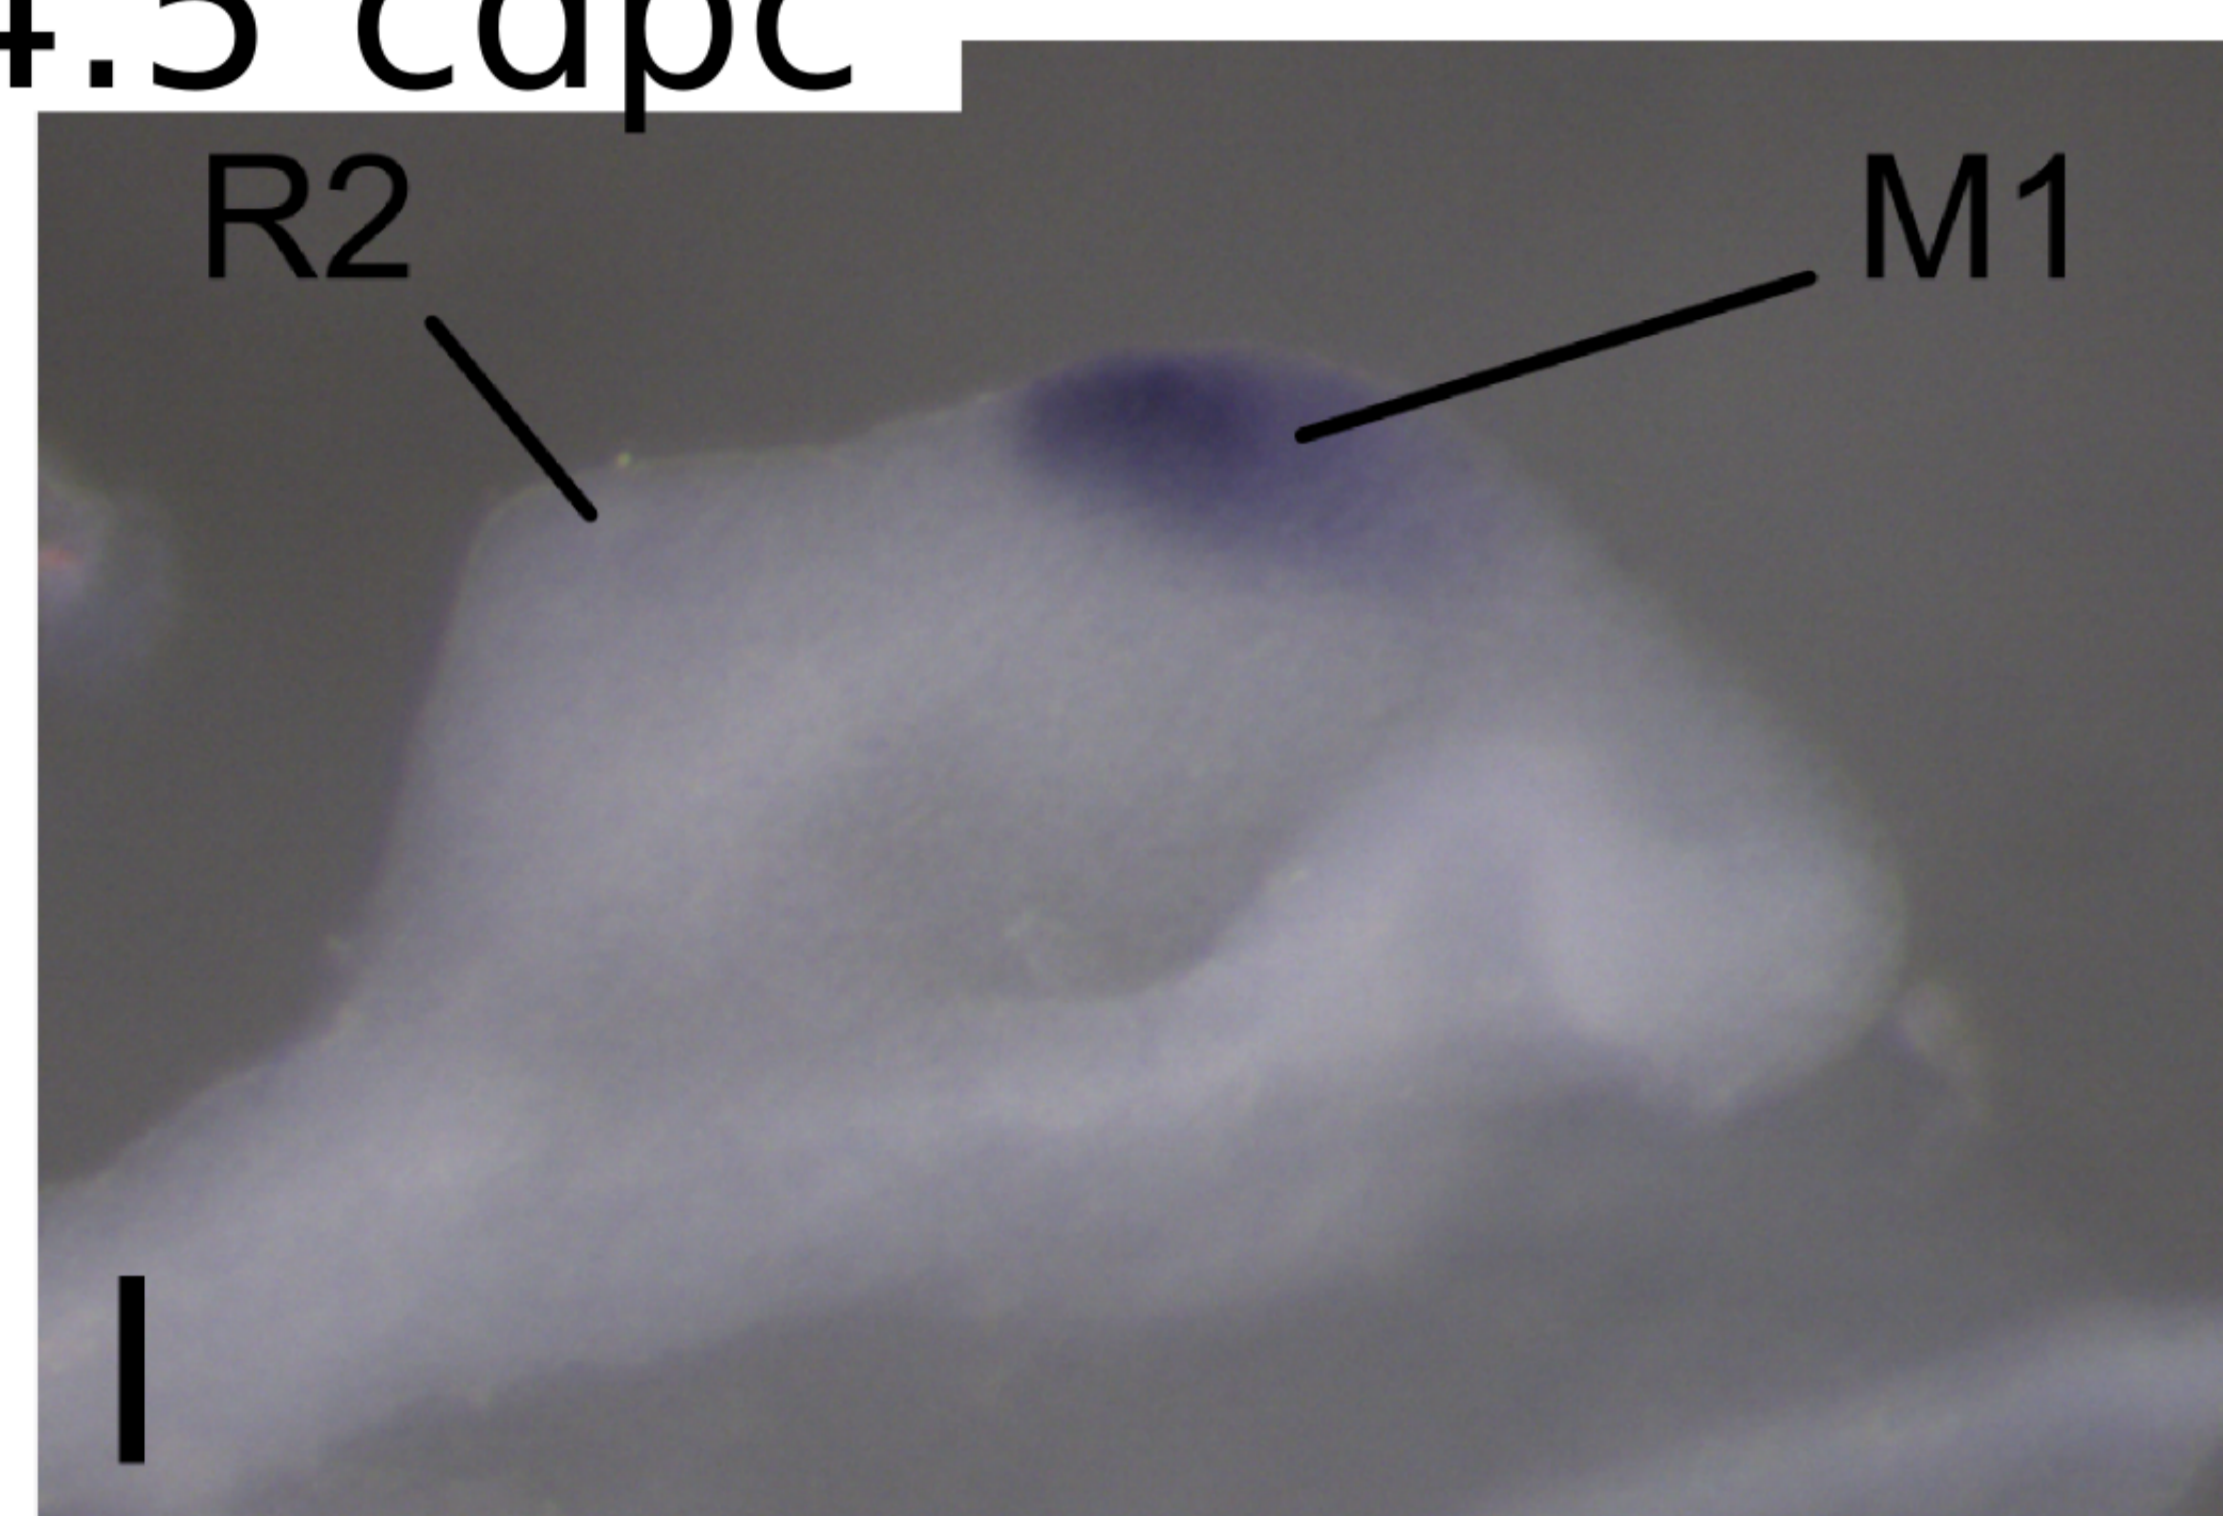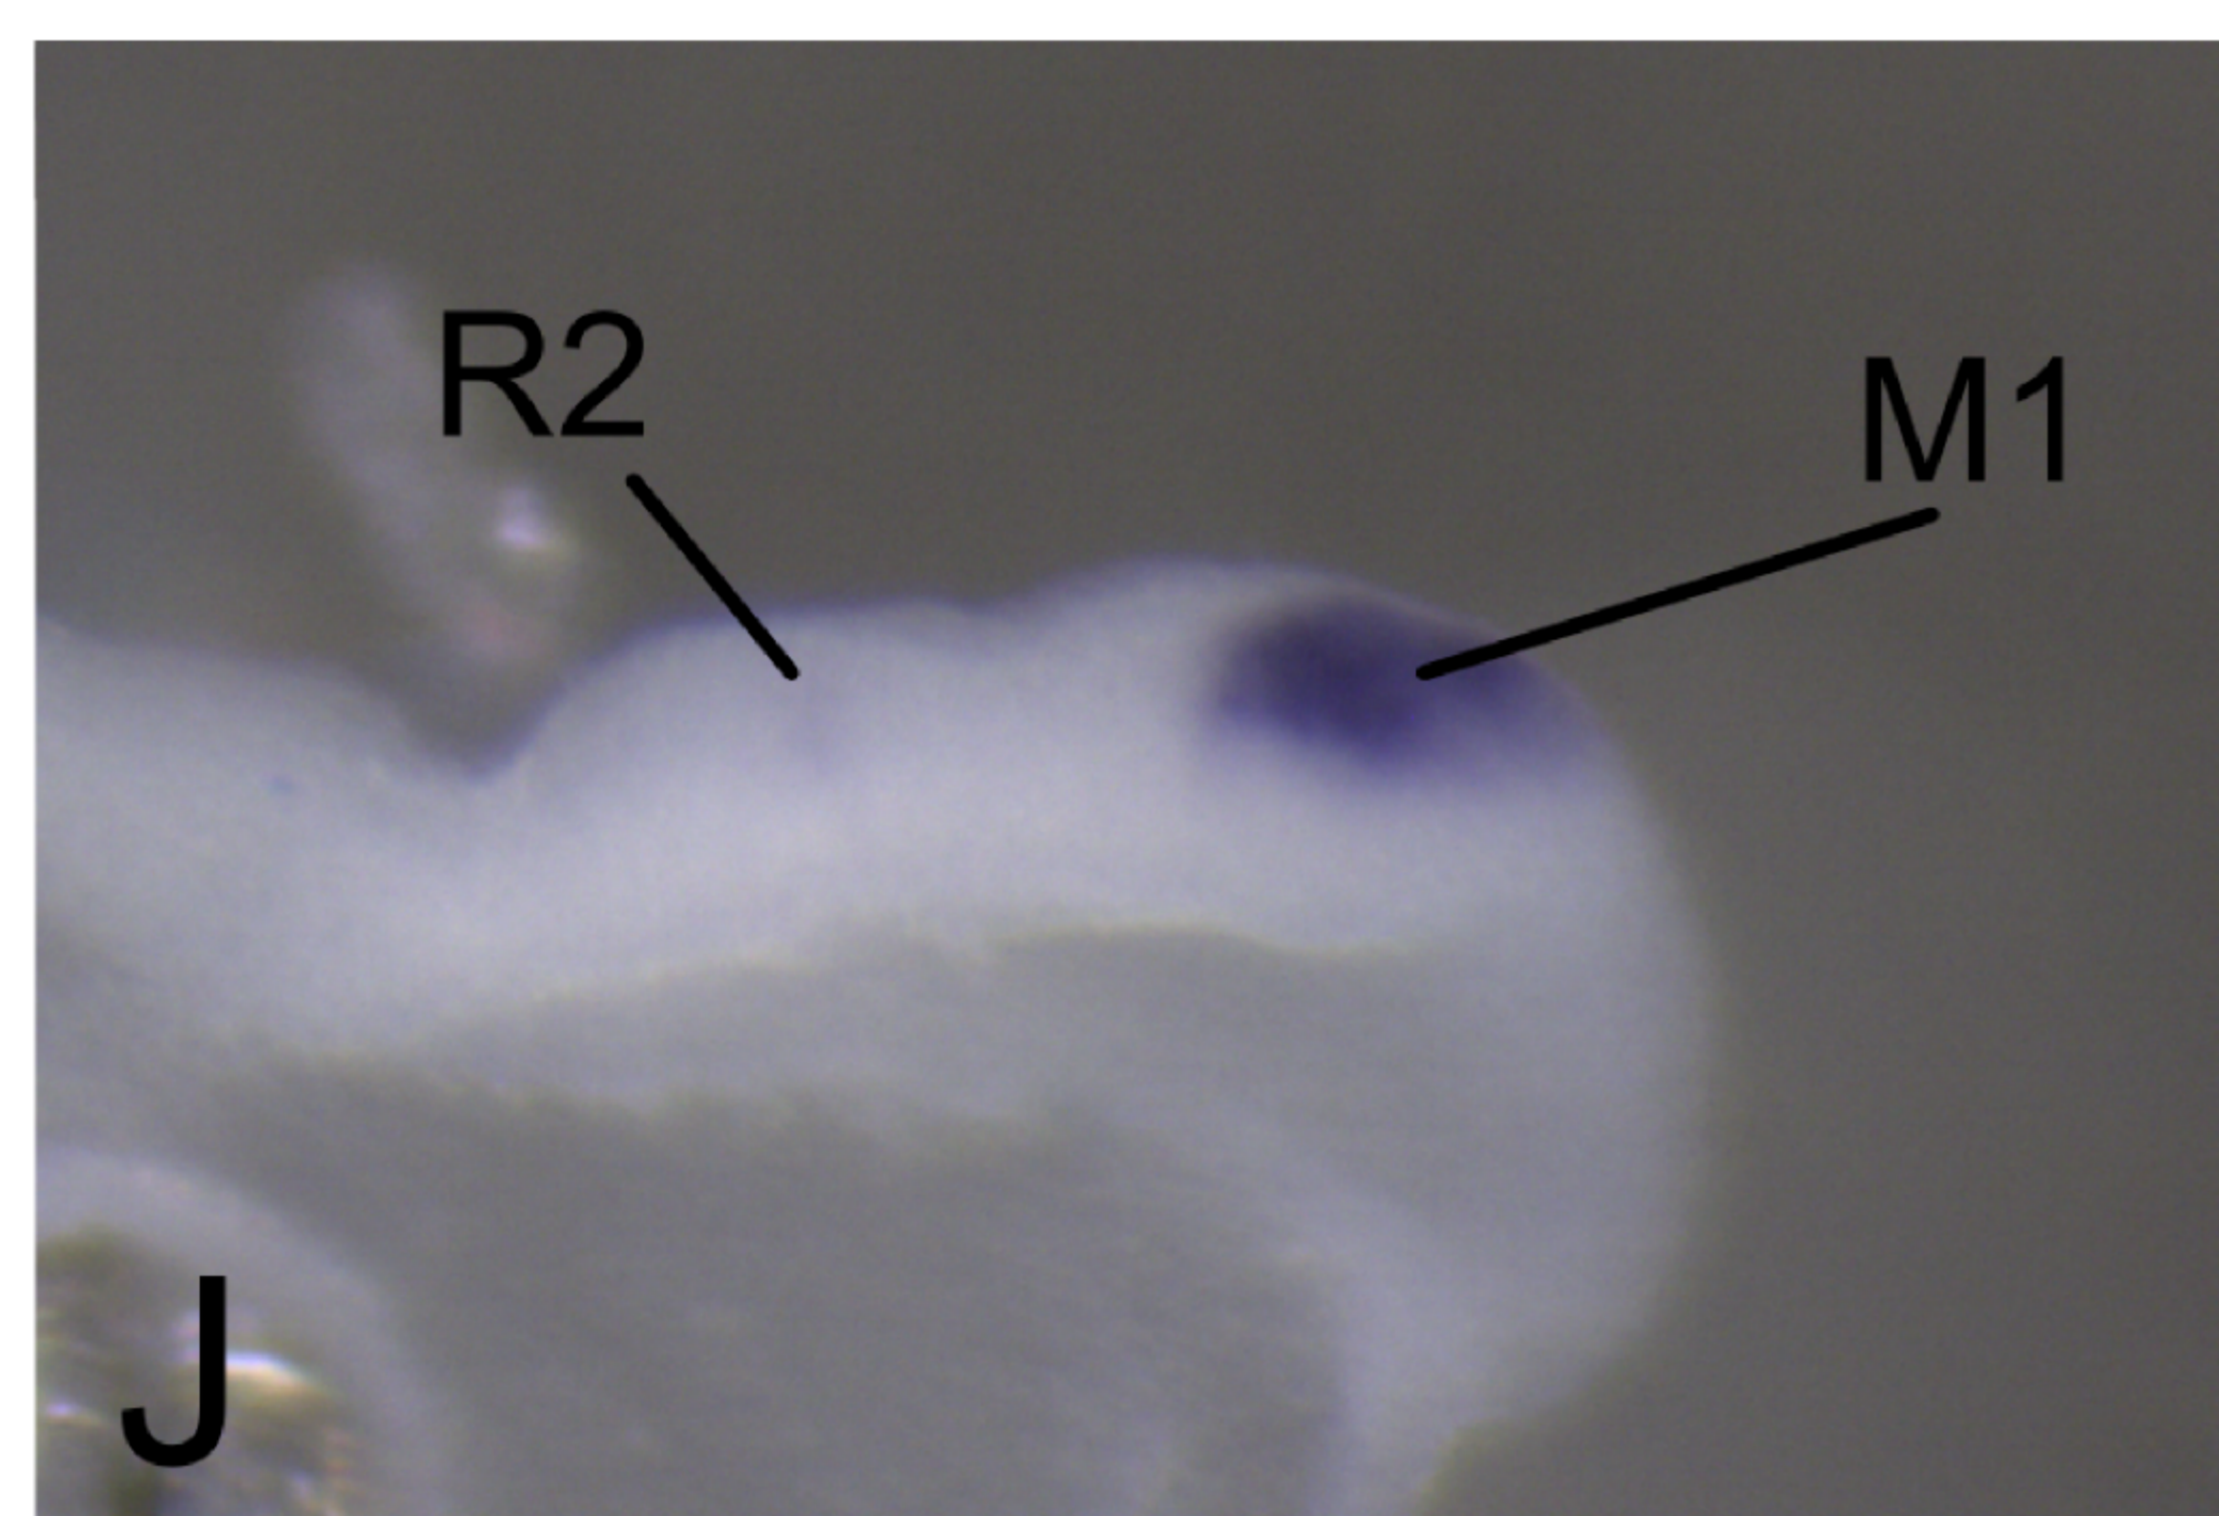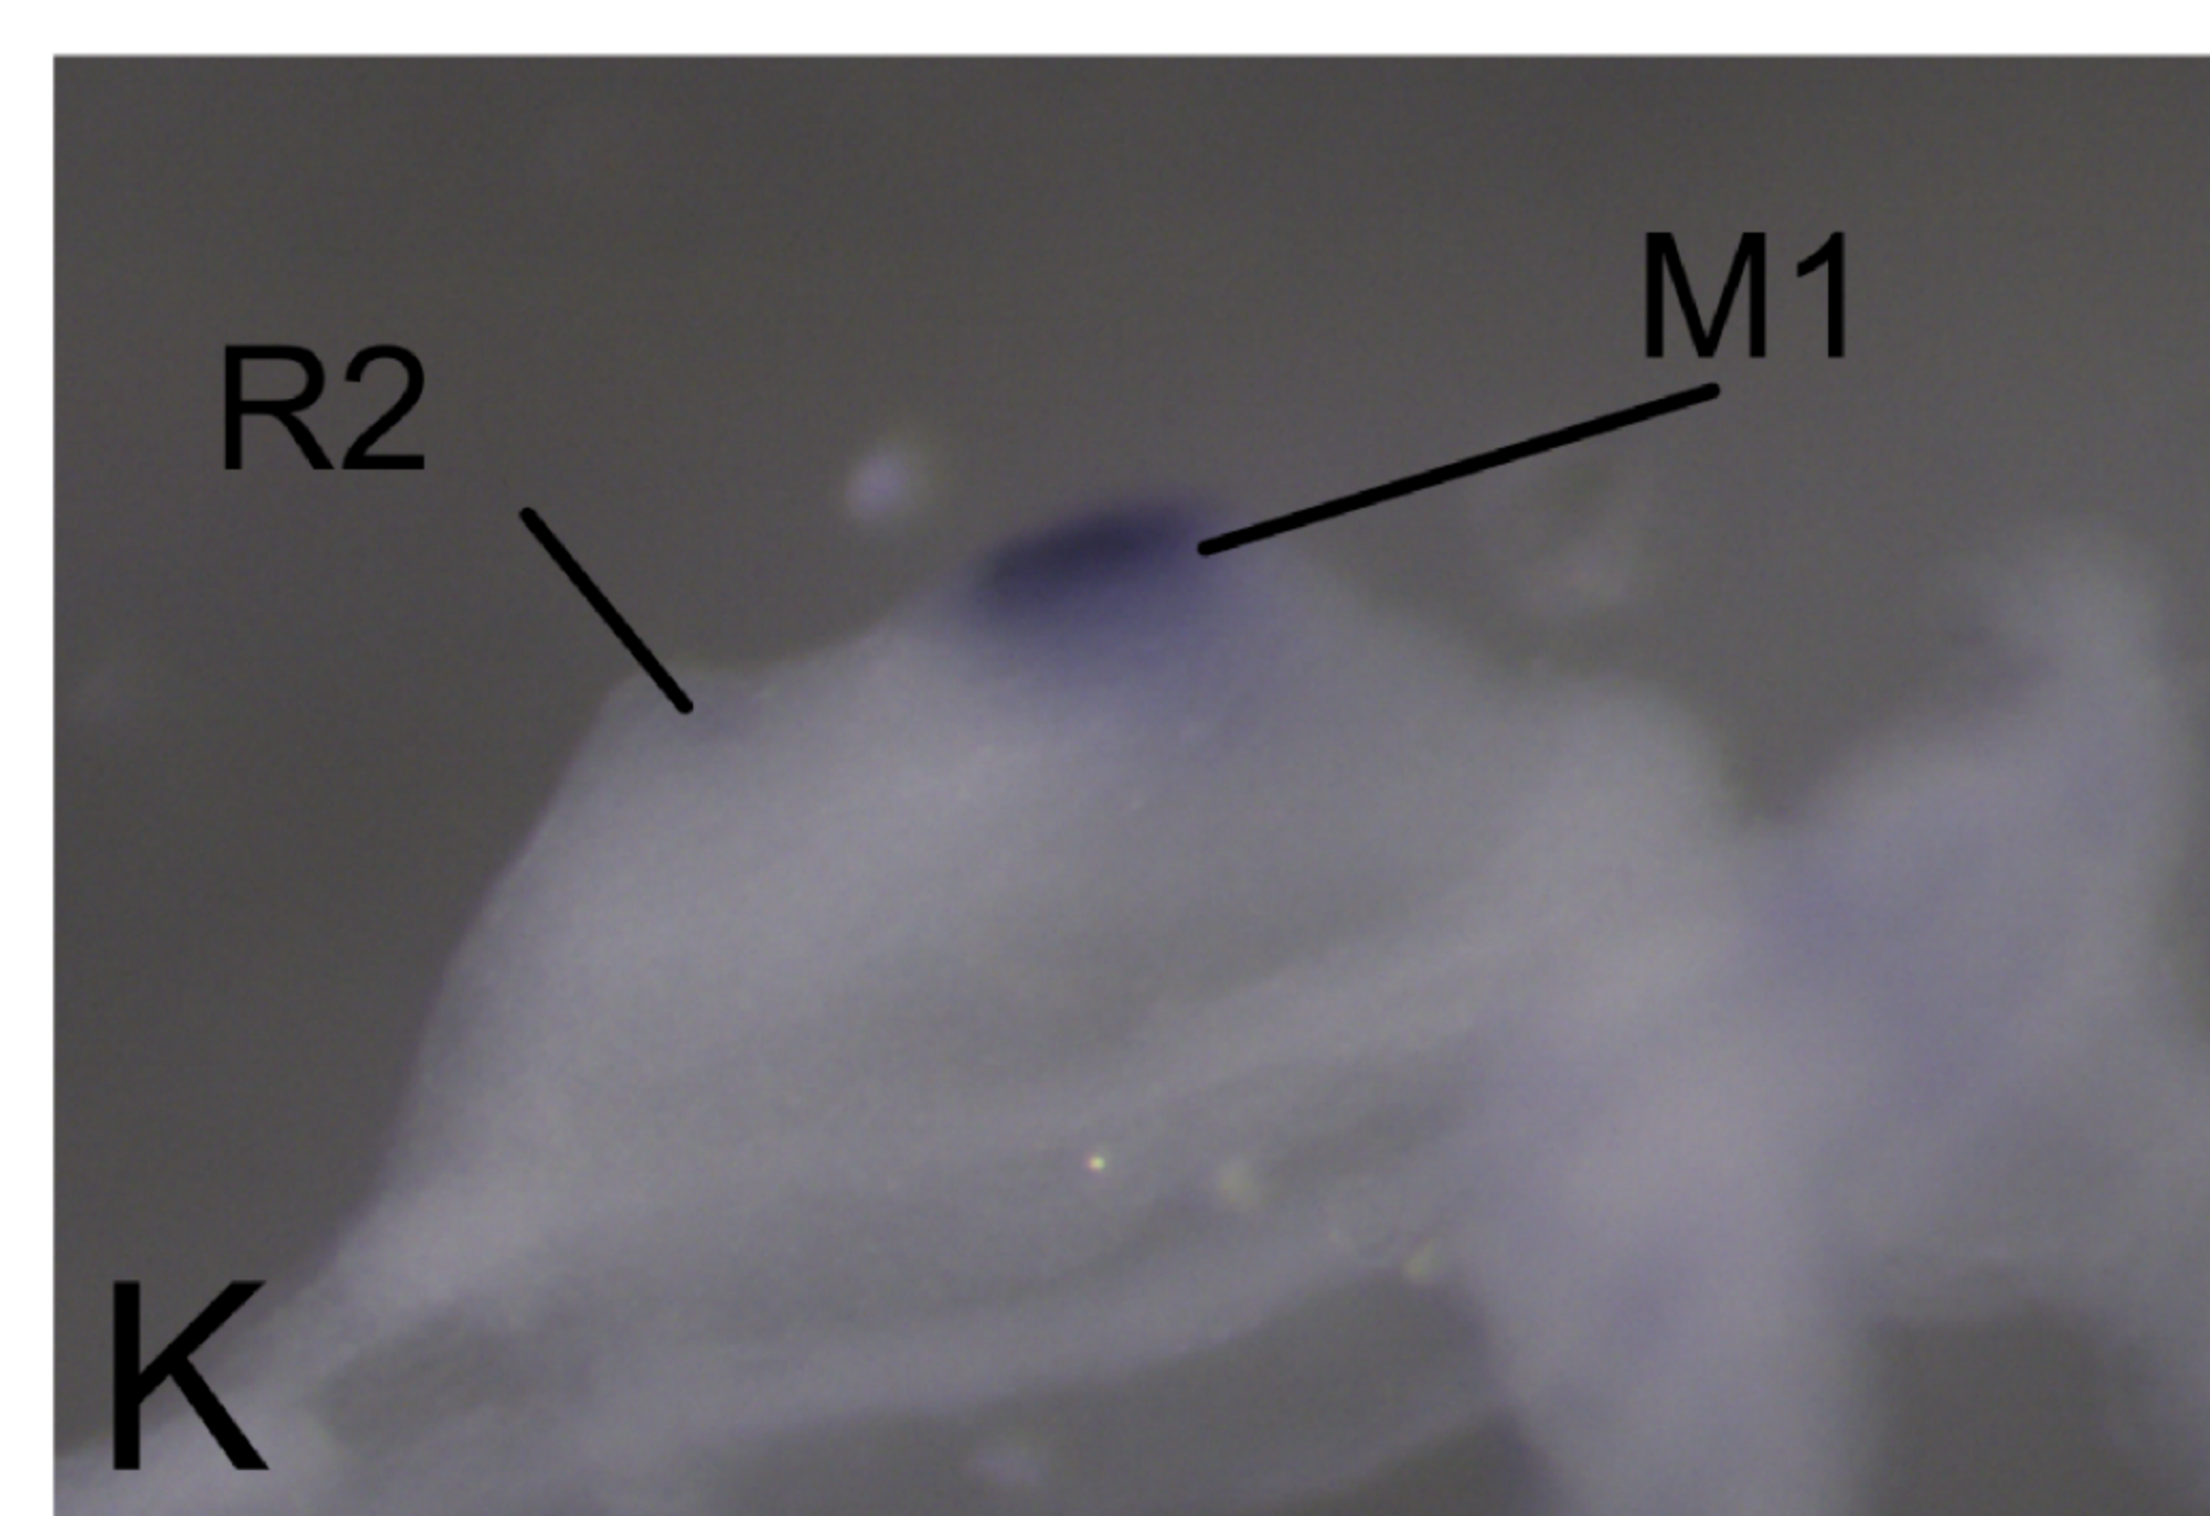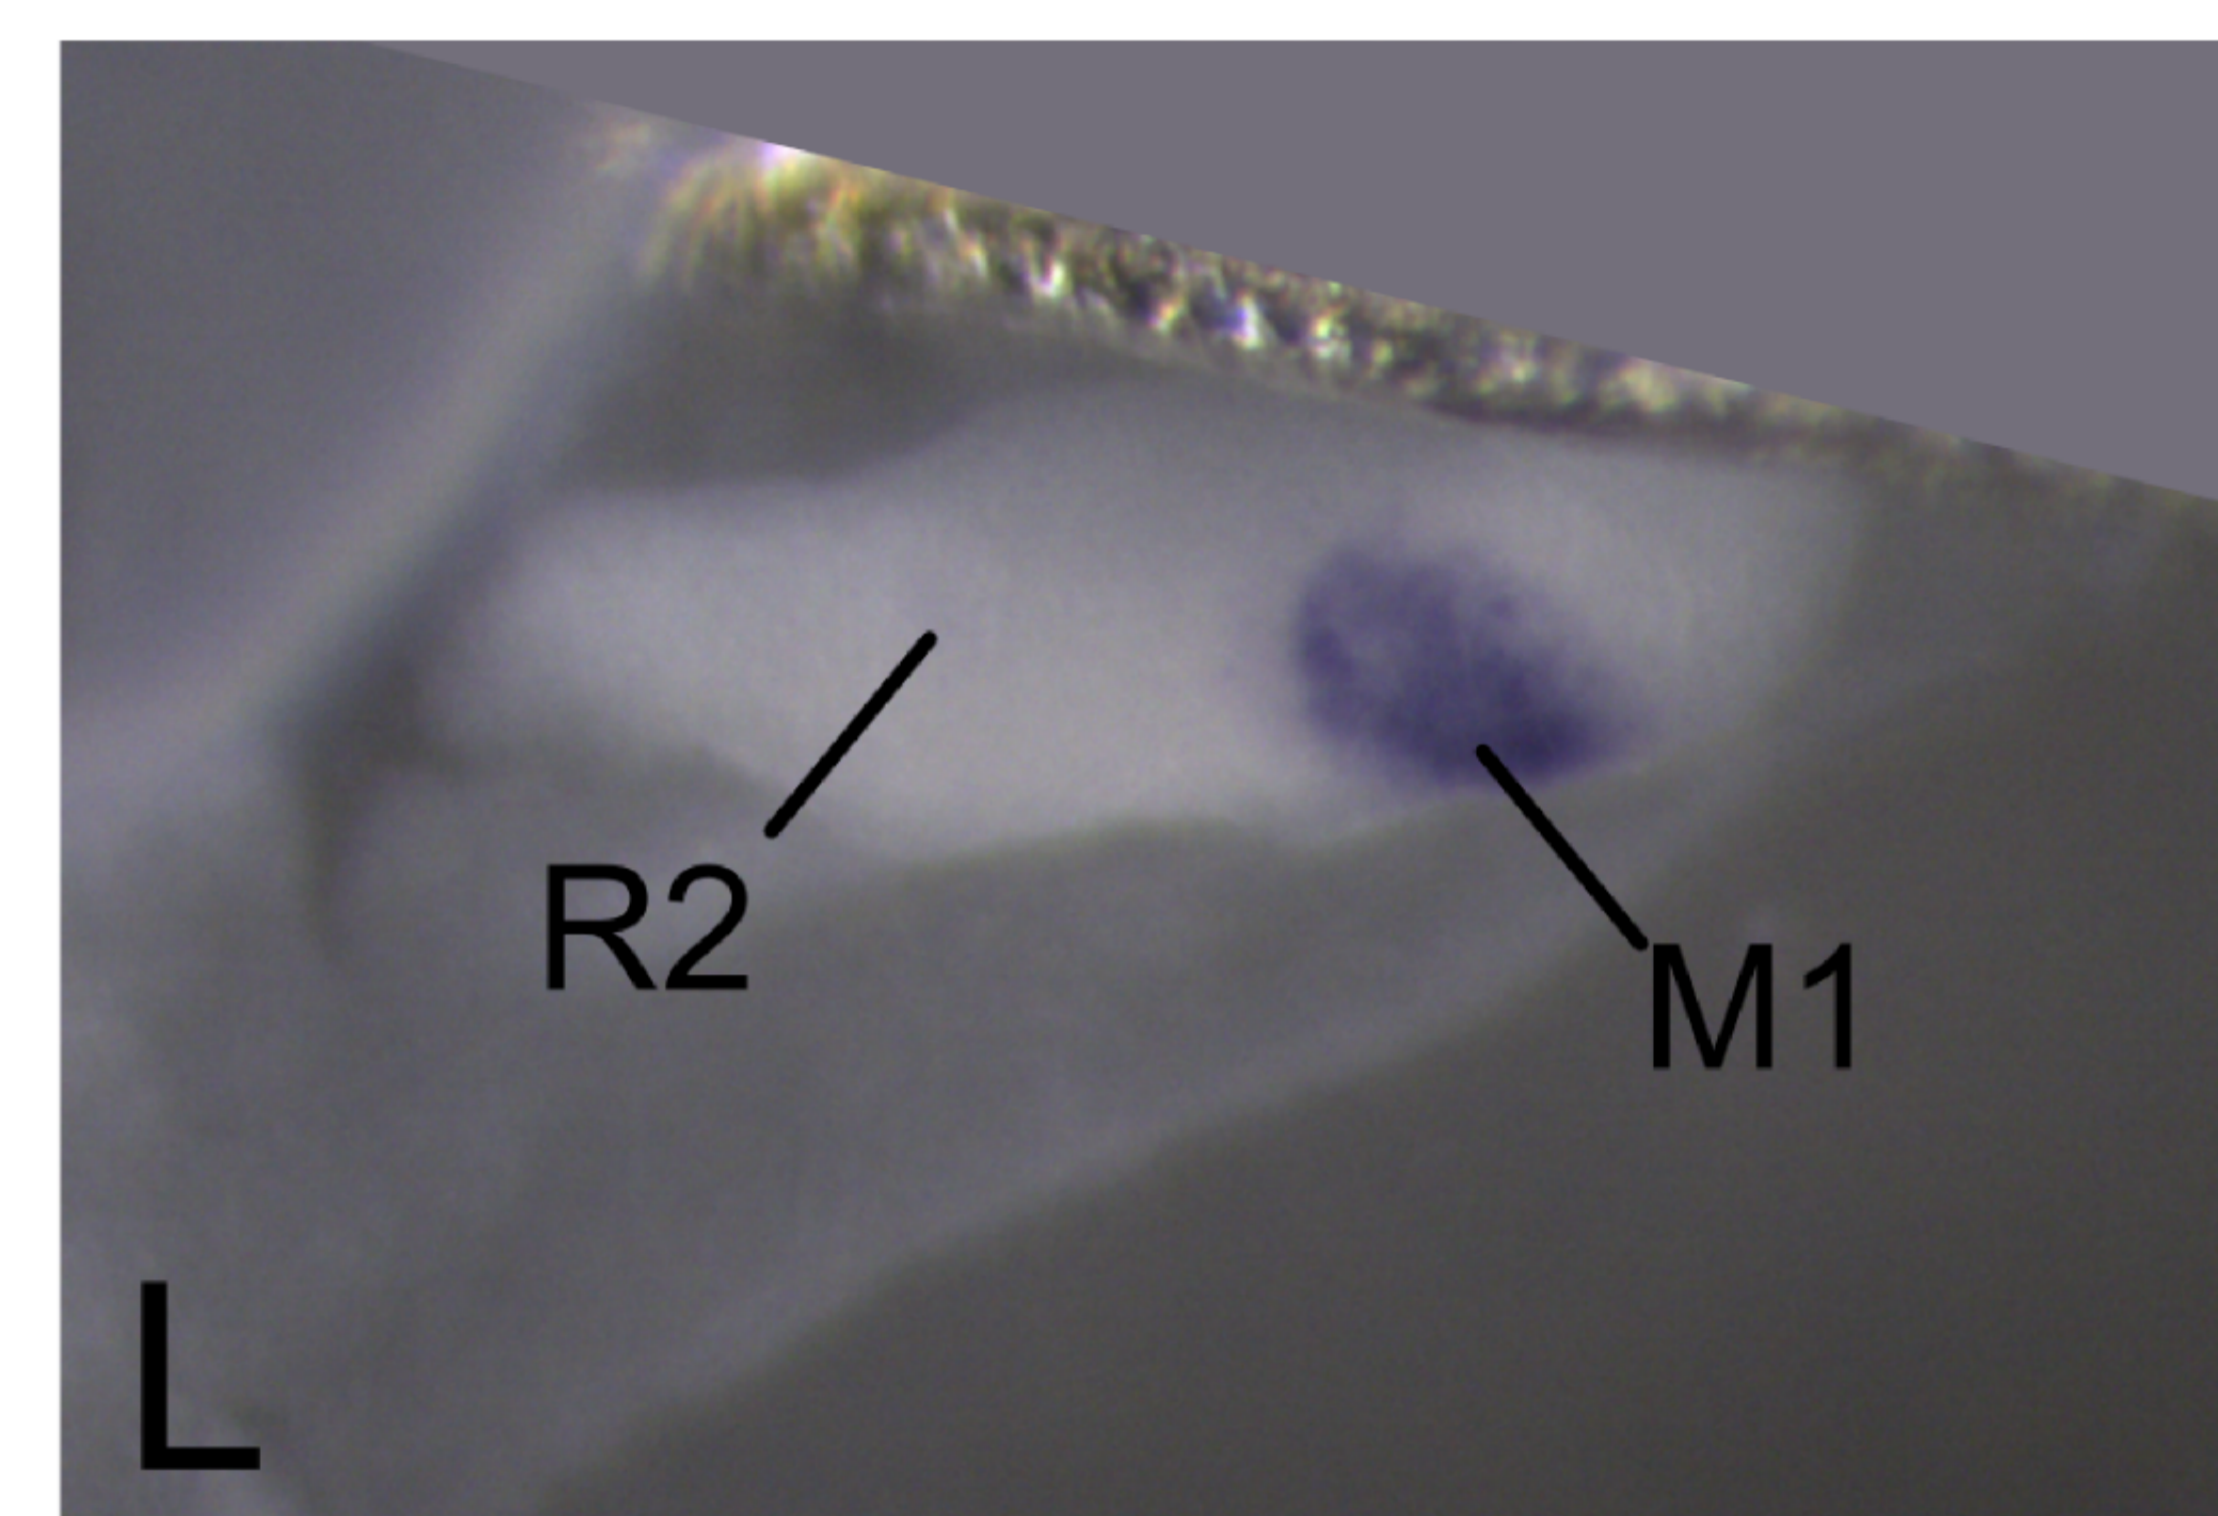

14.75 cdpc

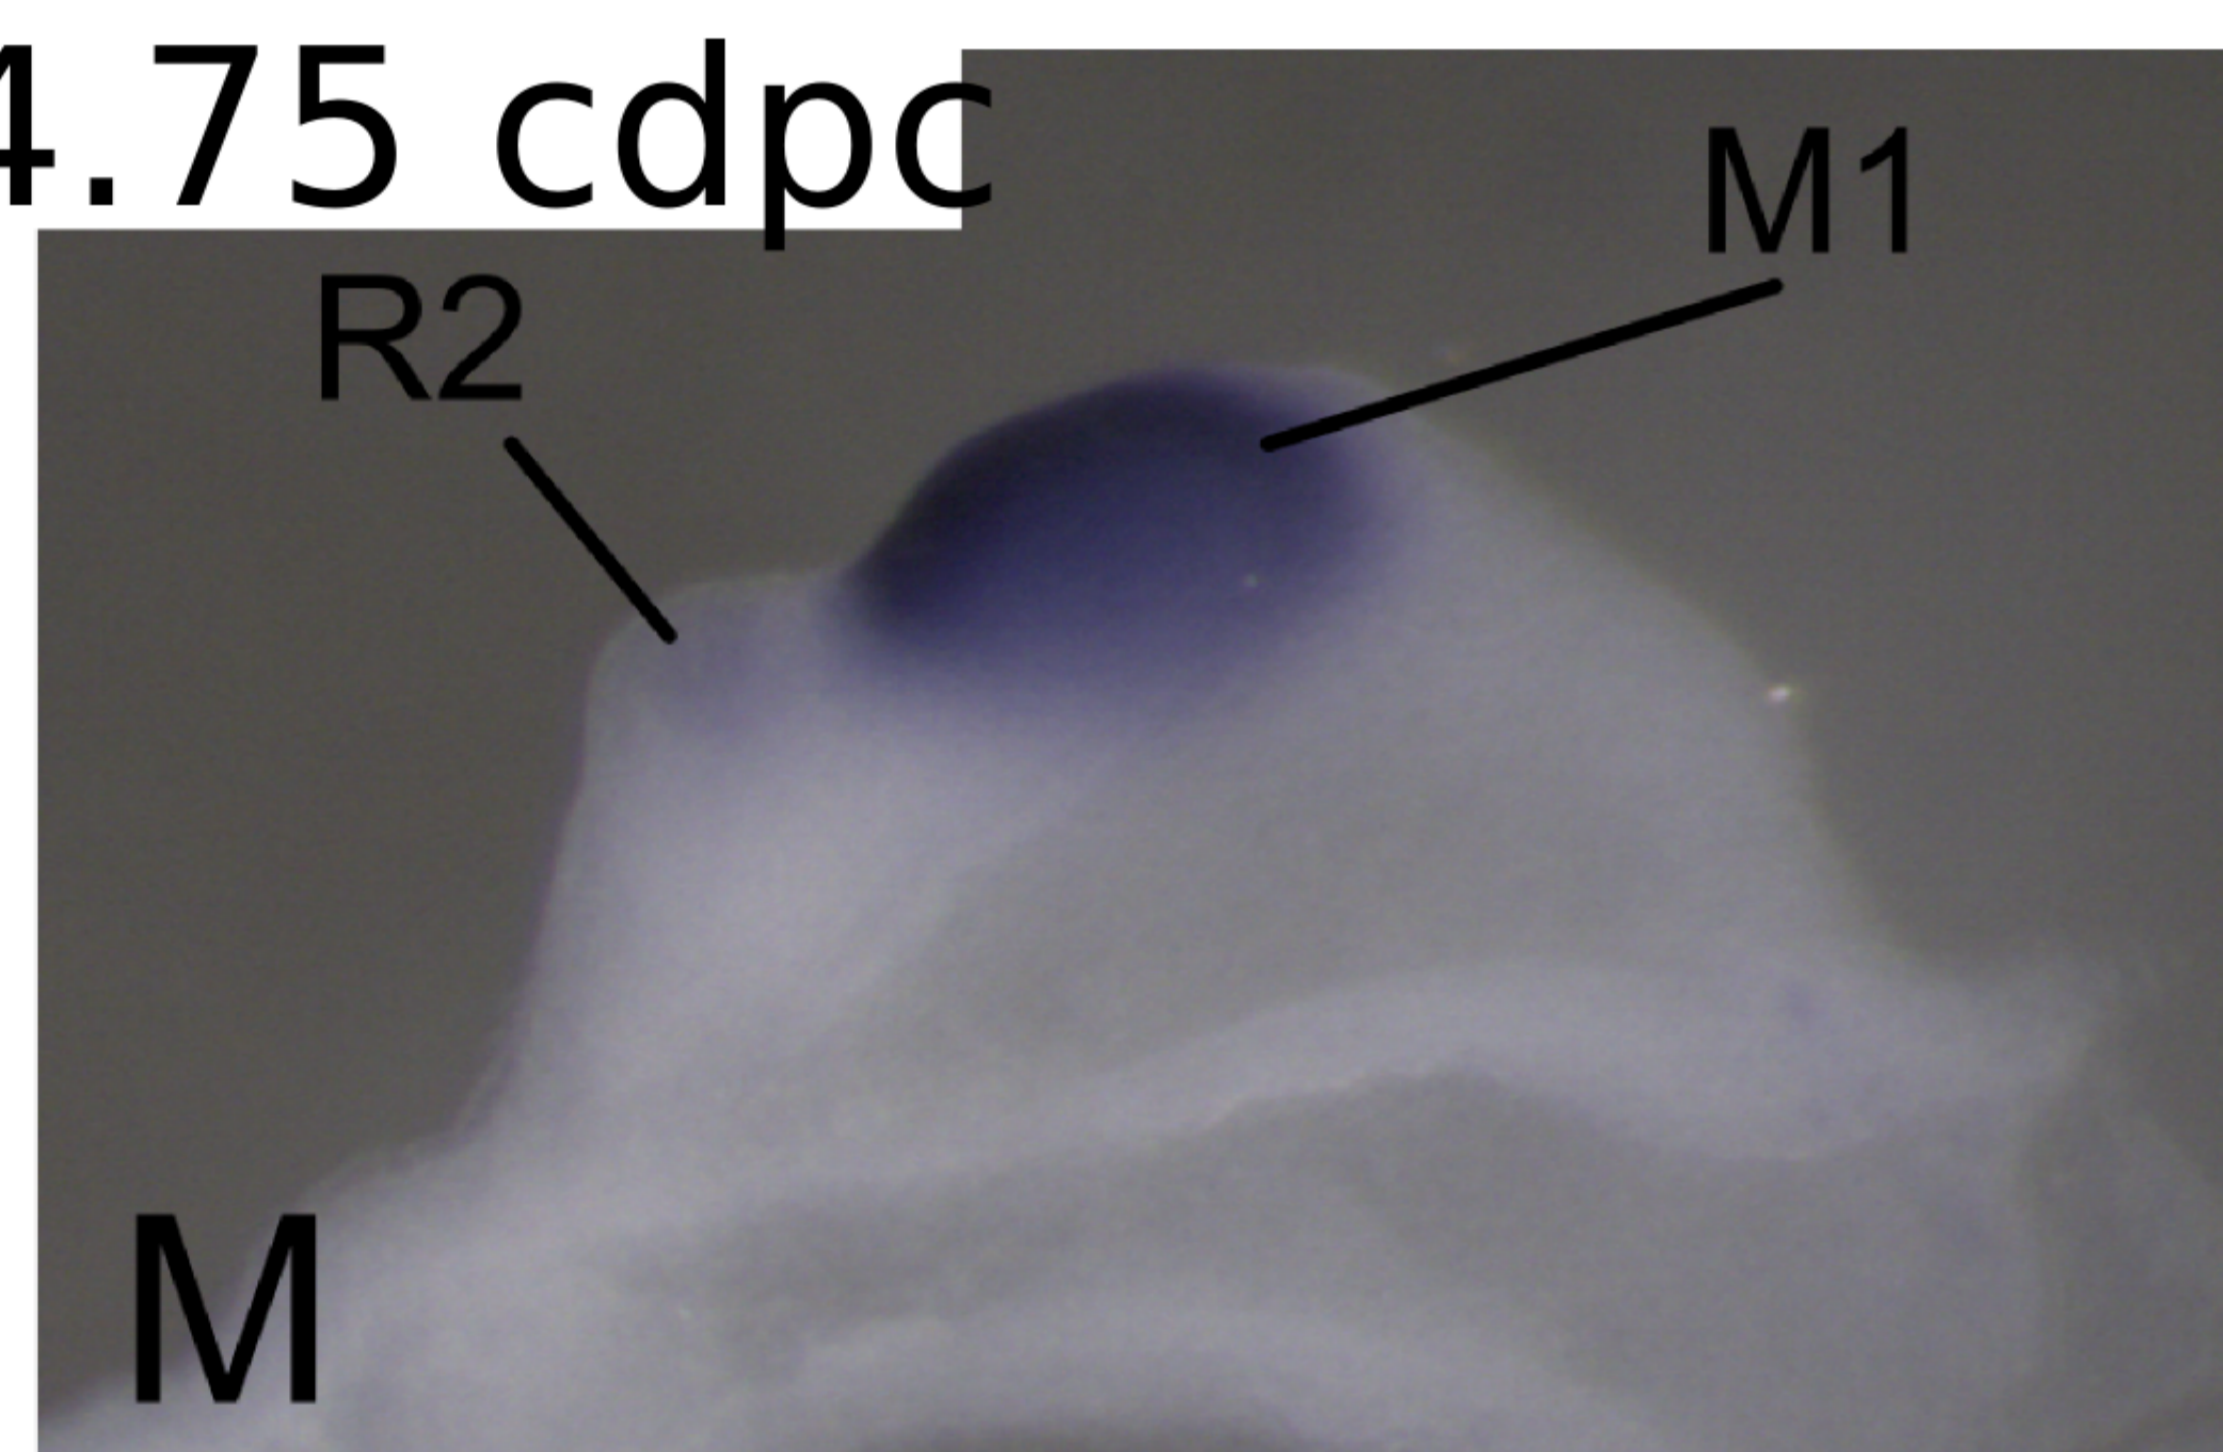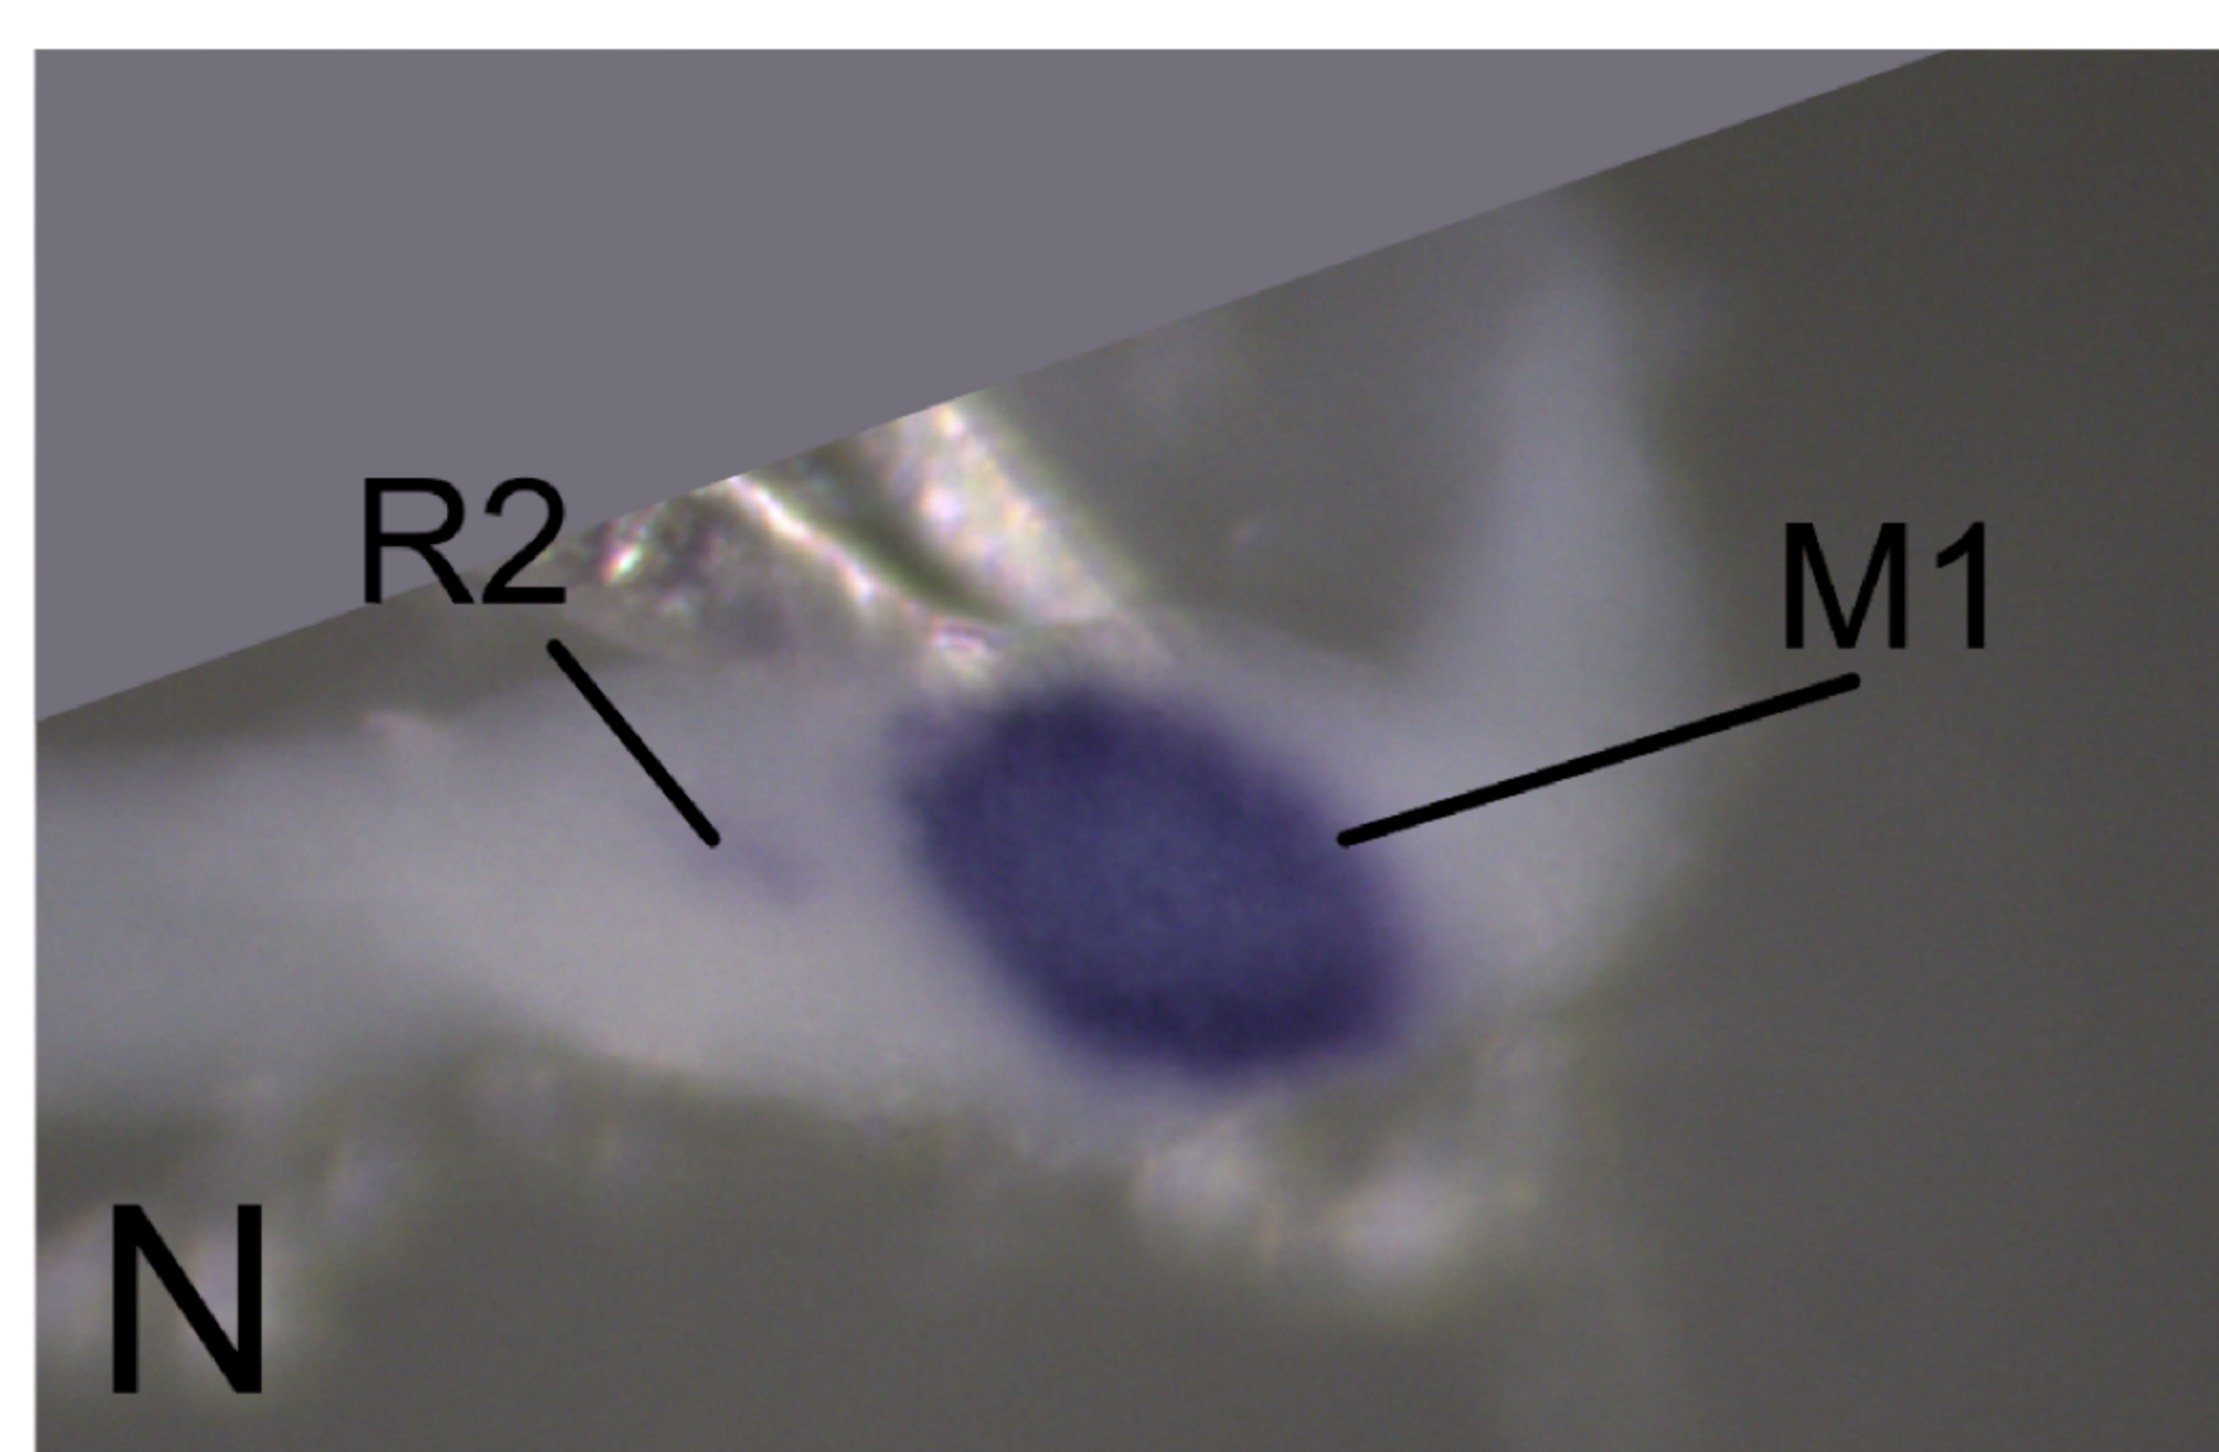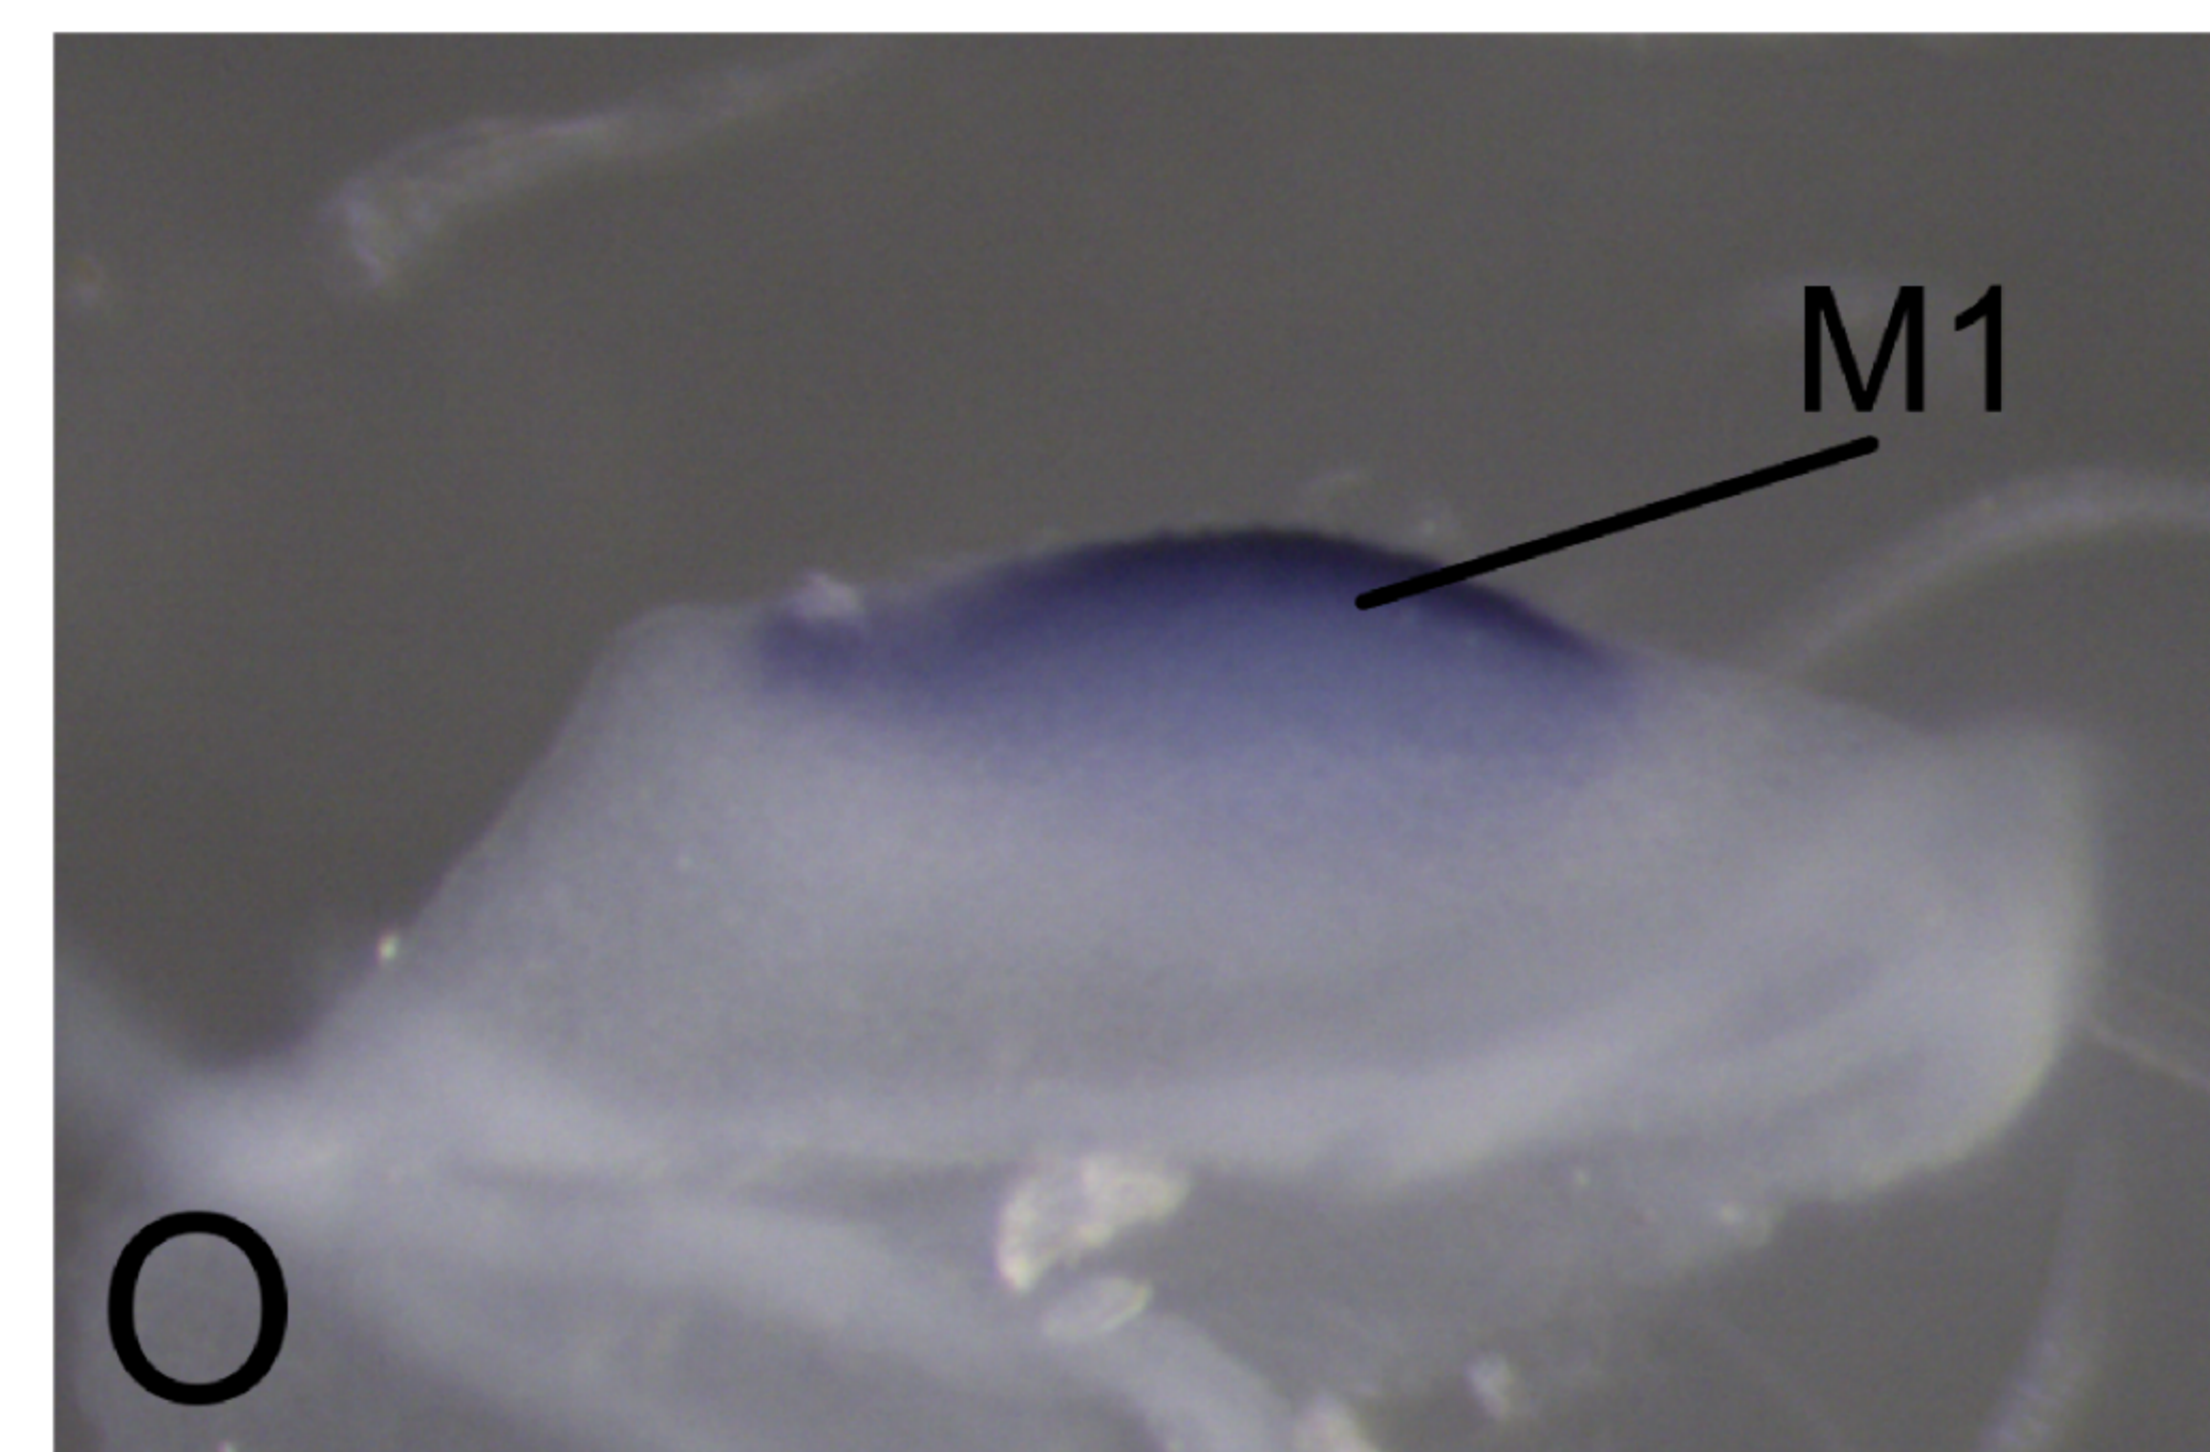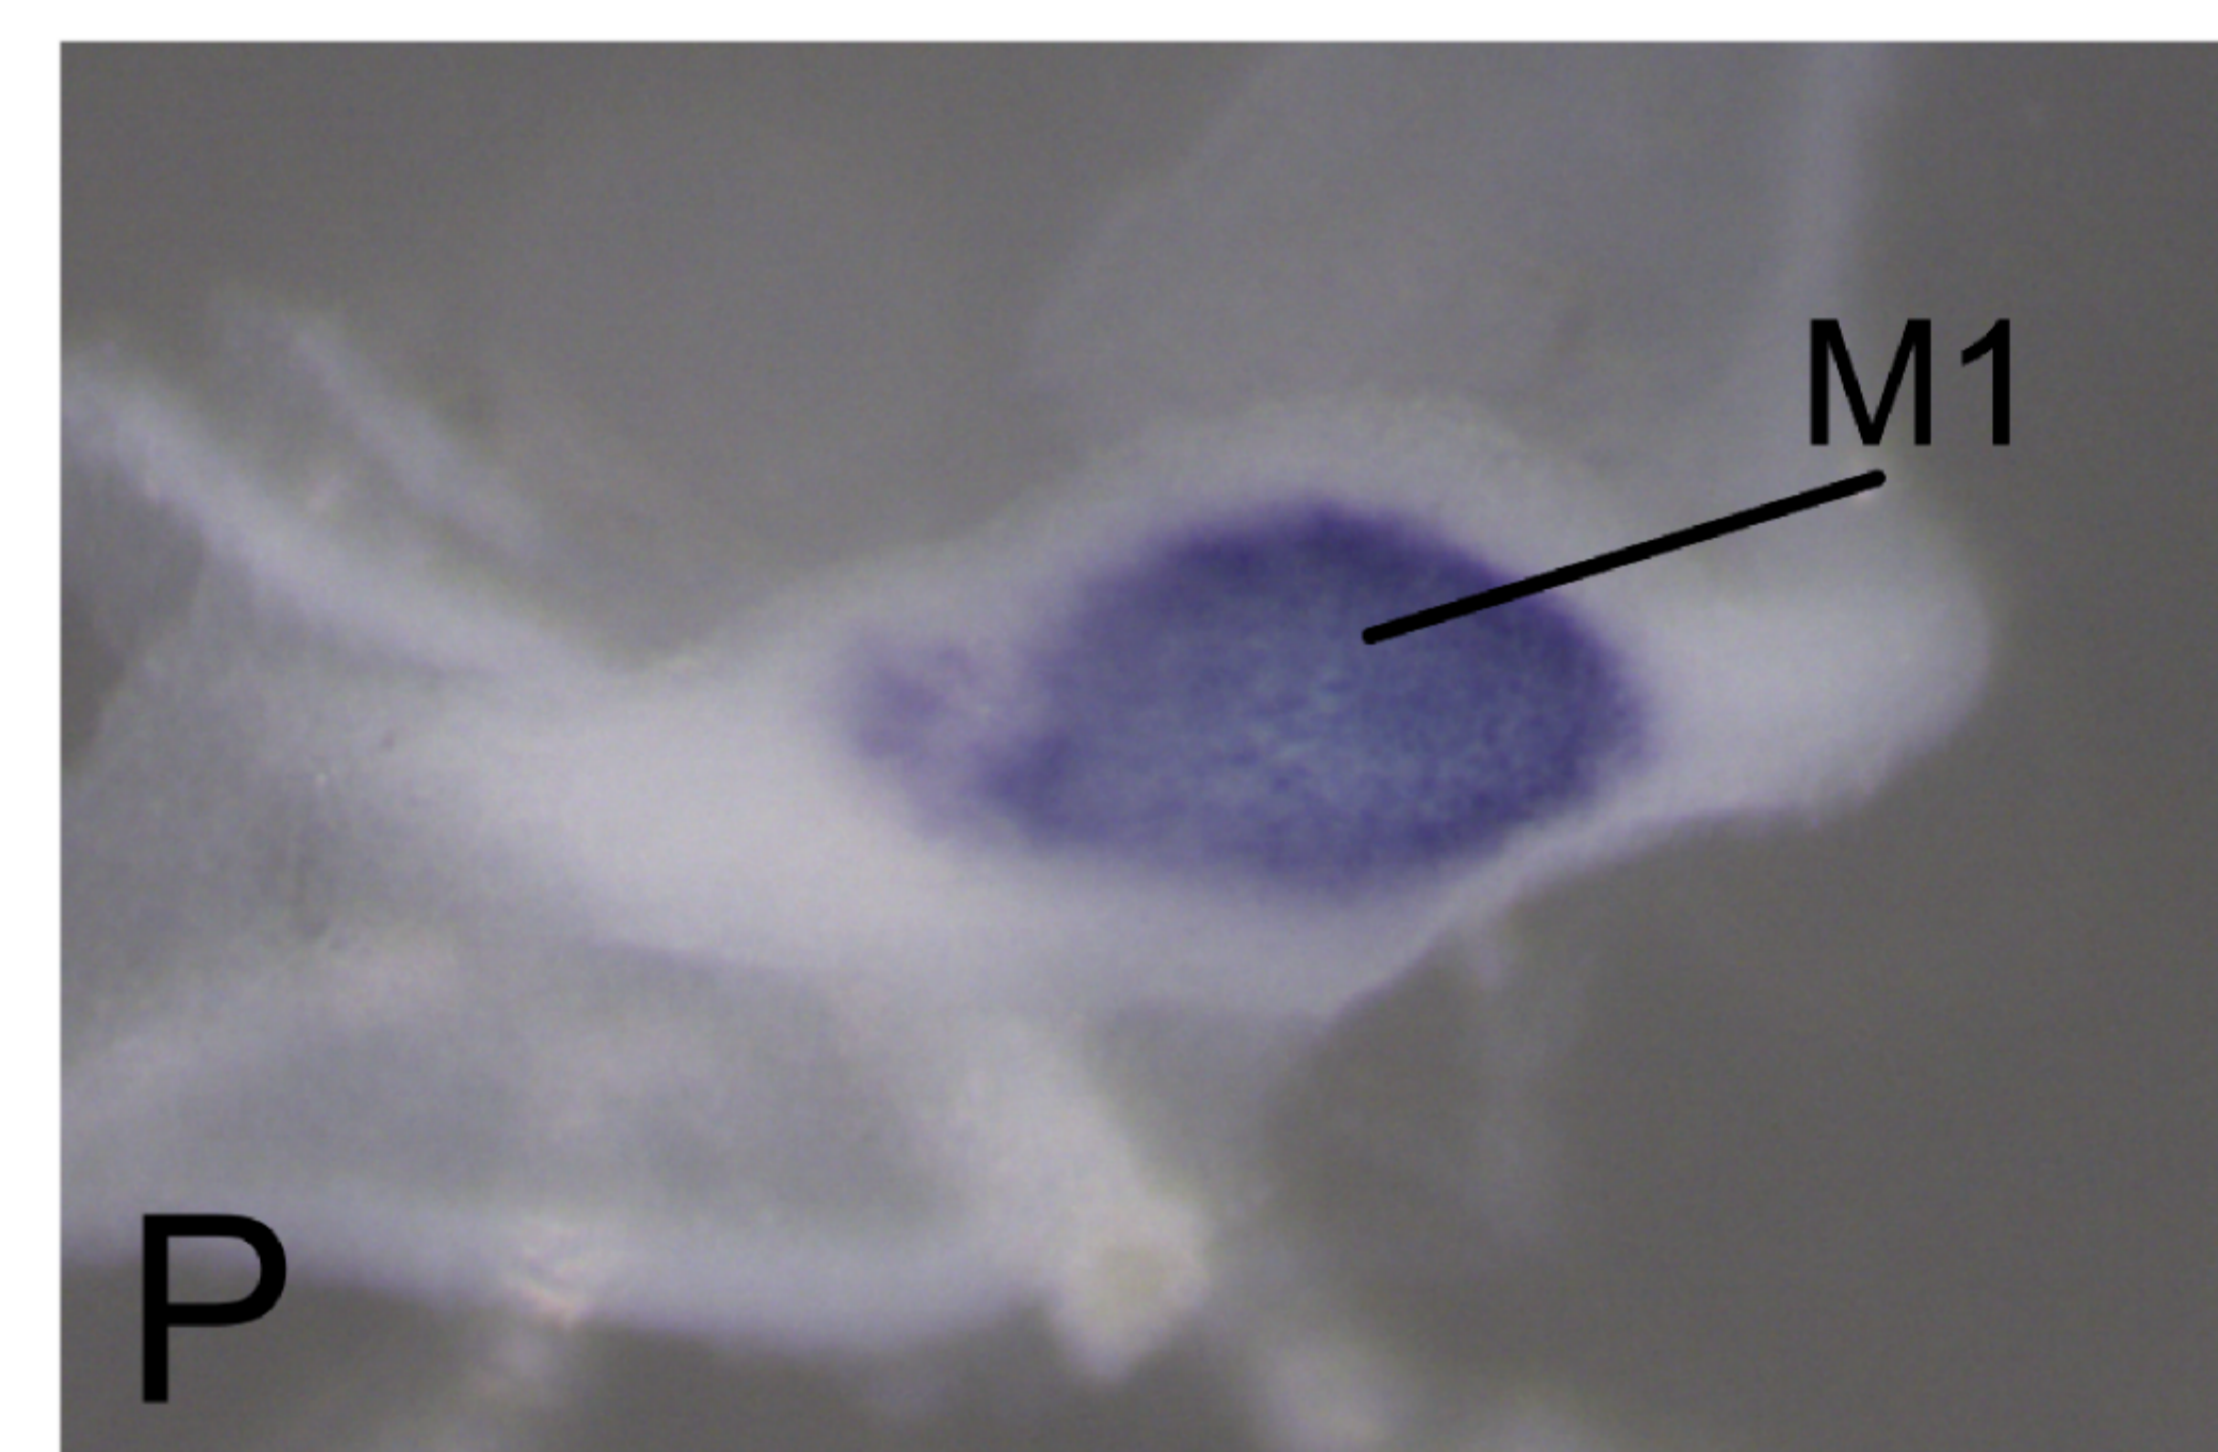

15.0 cdpc

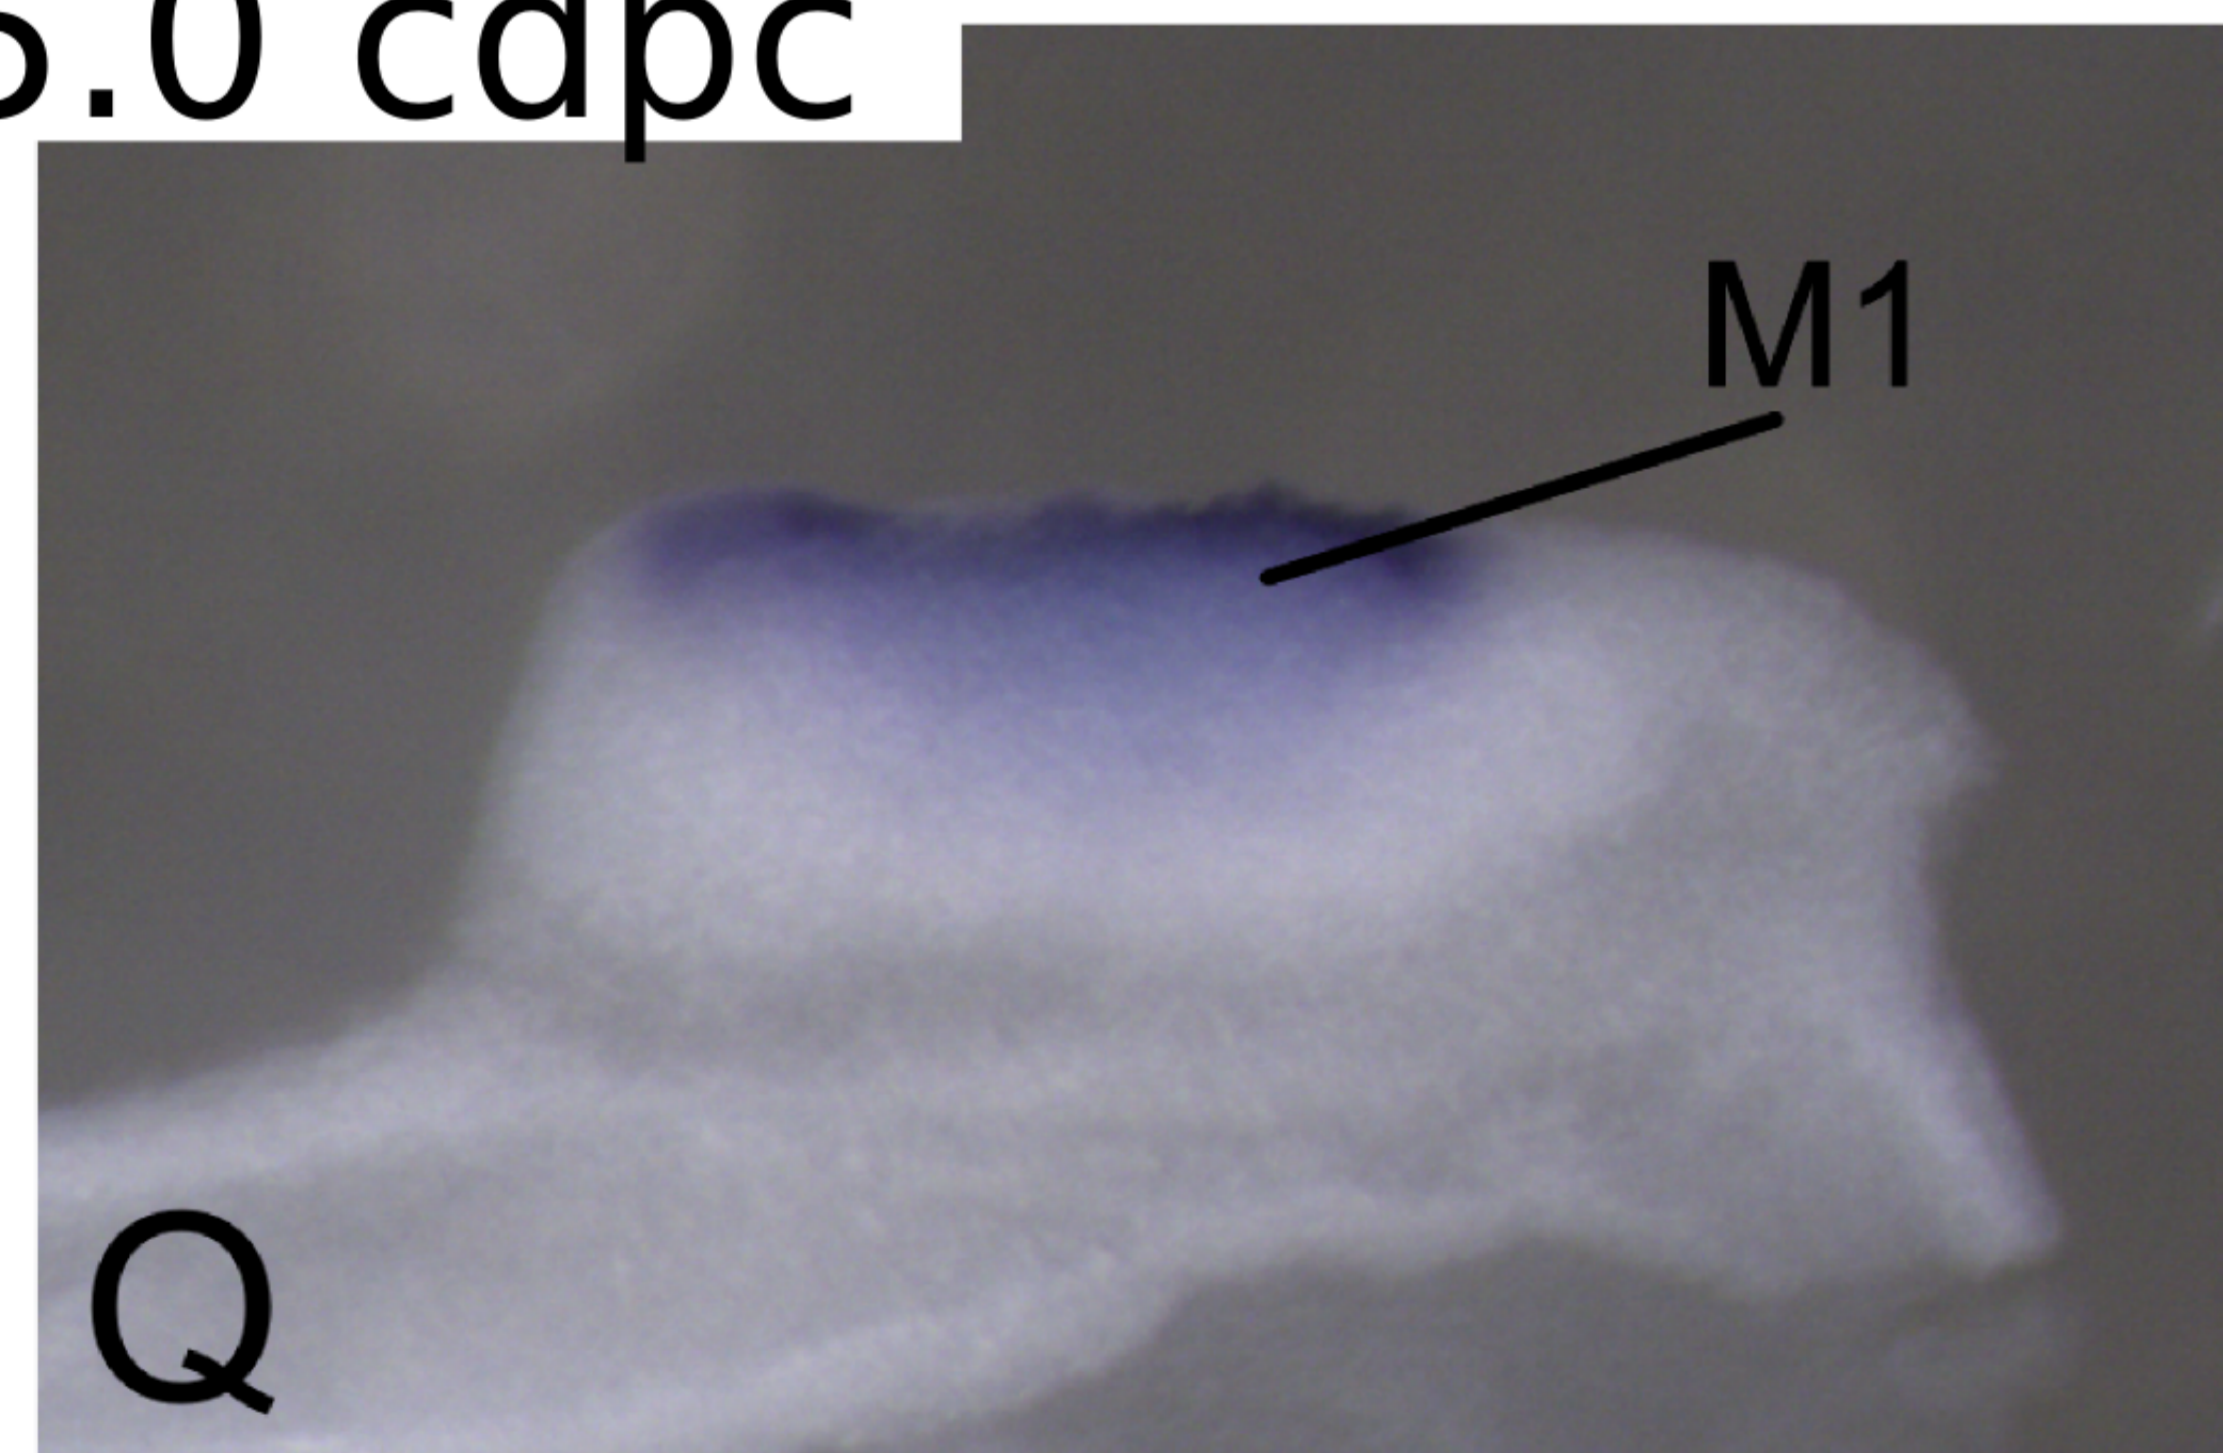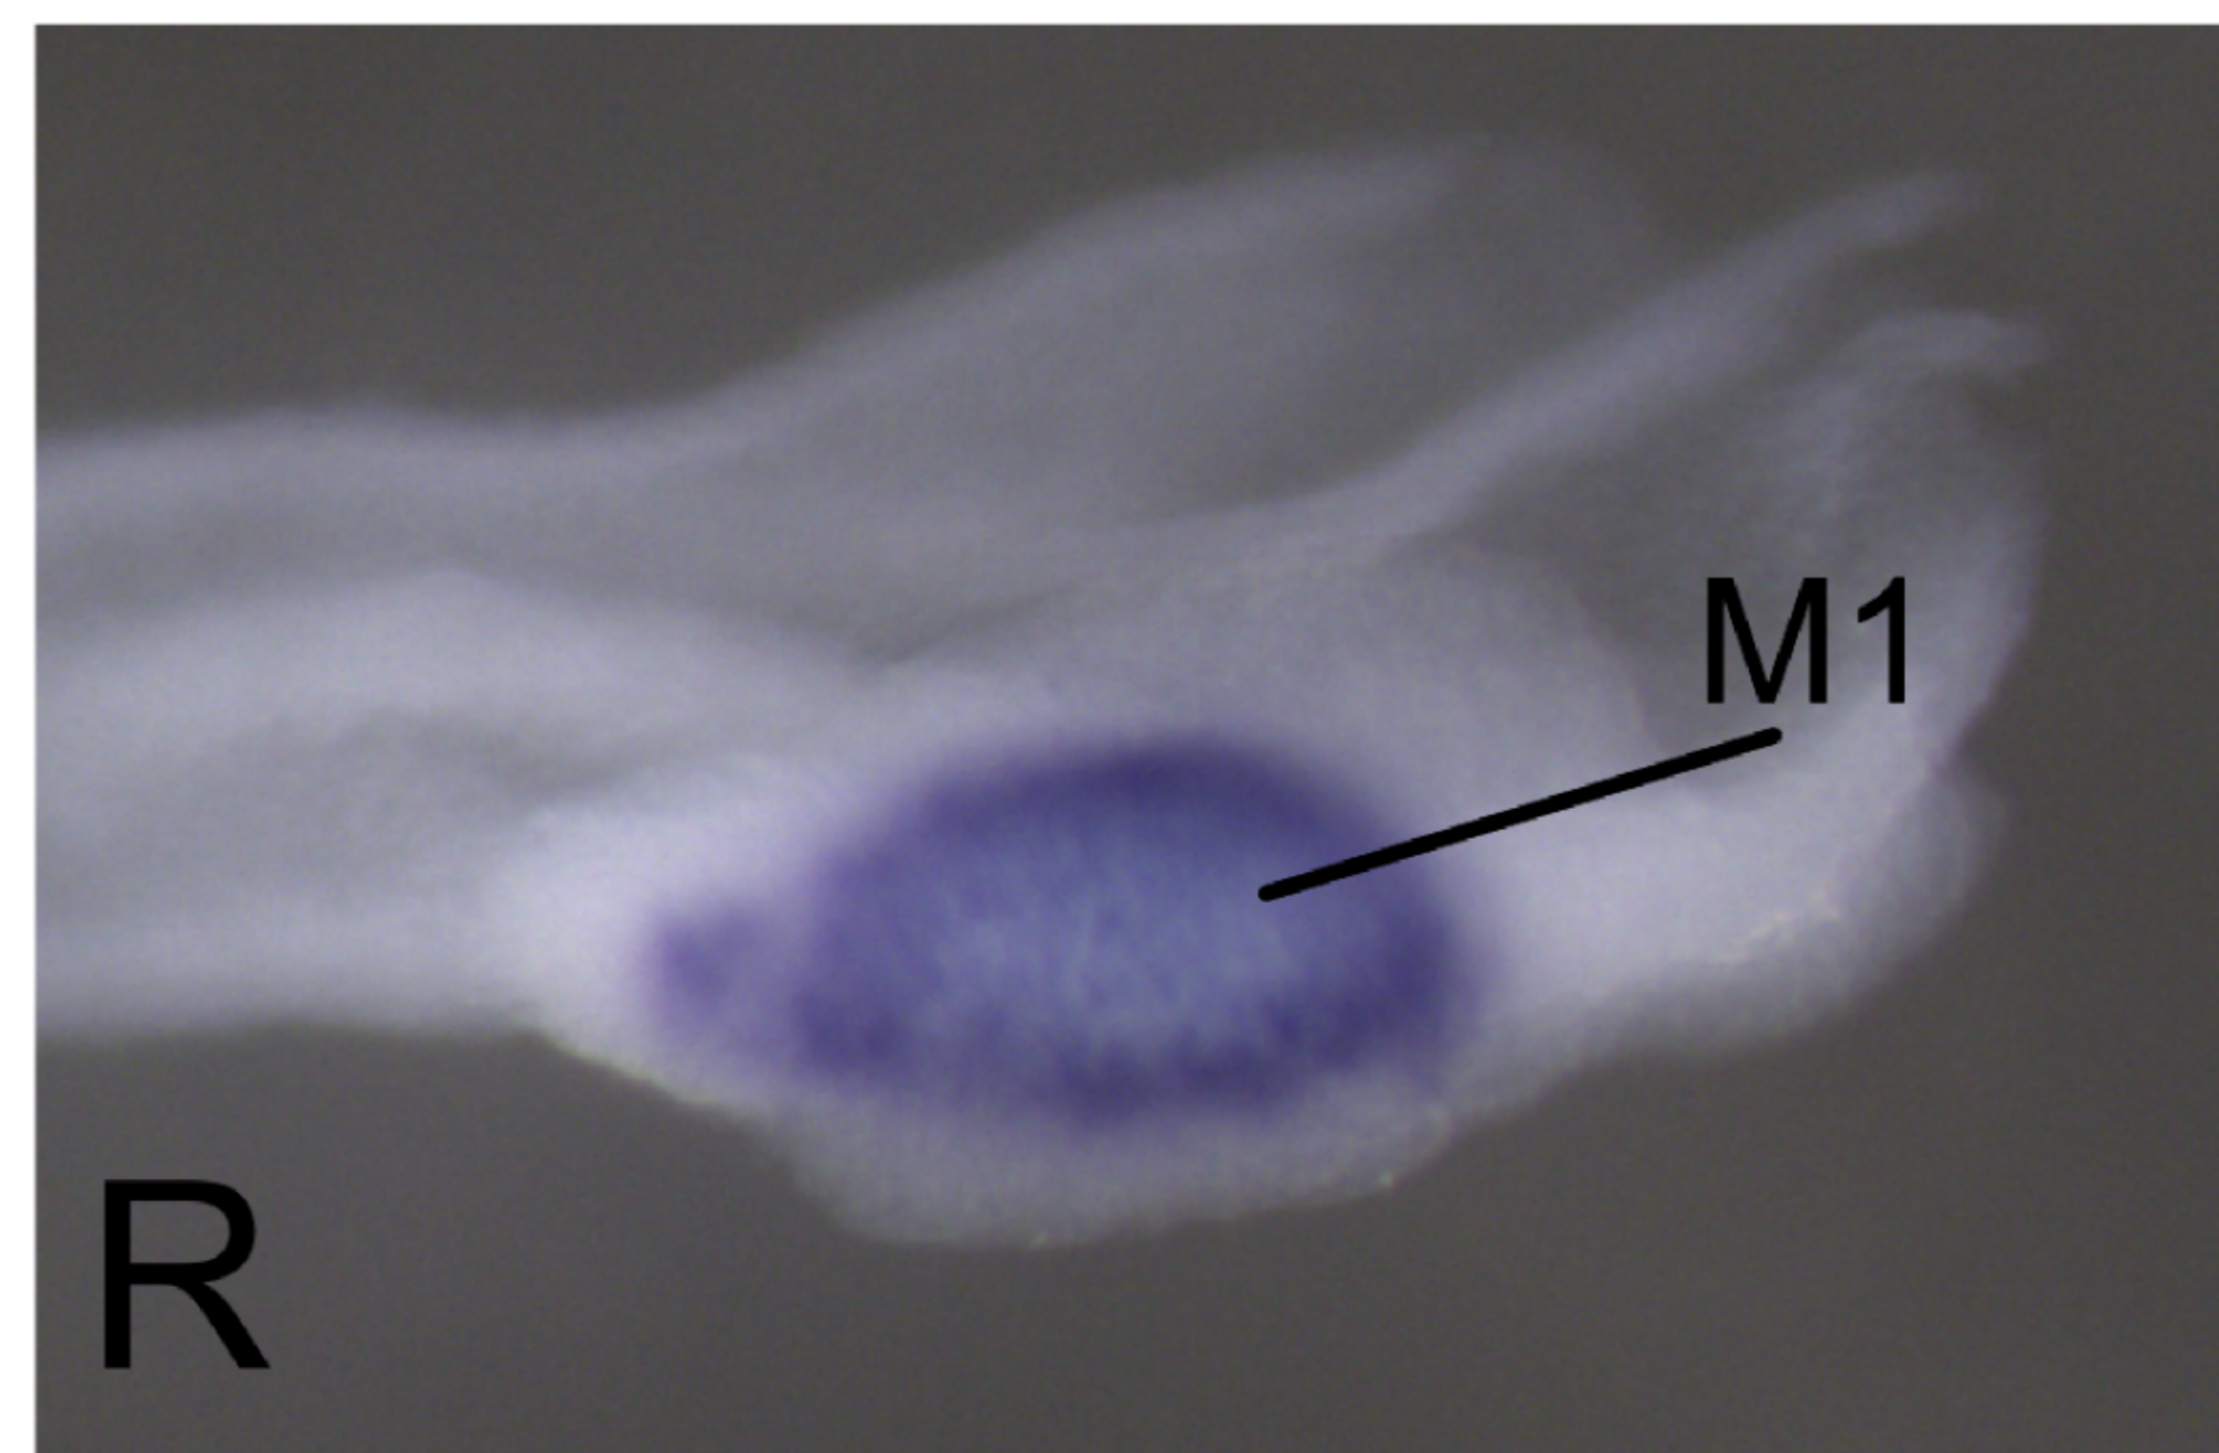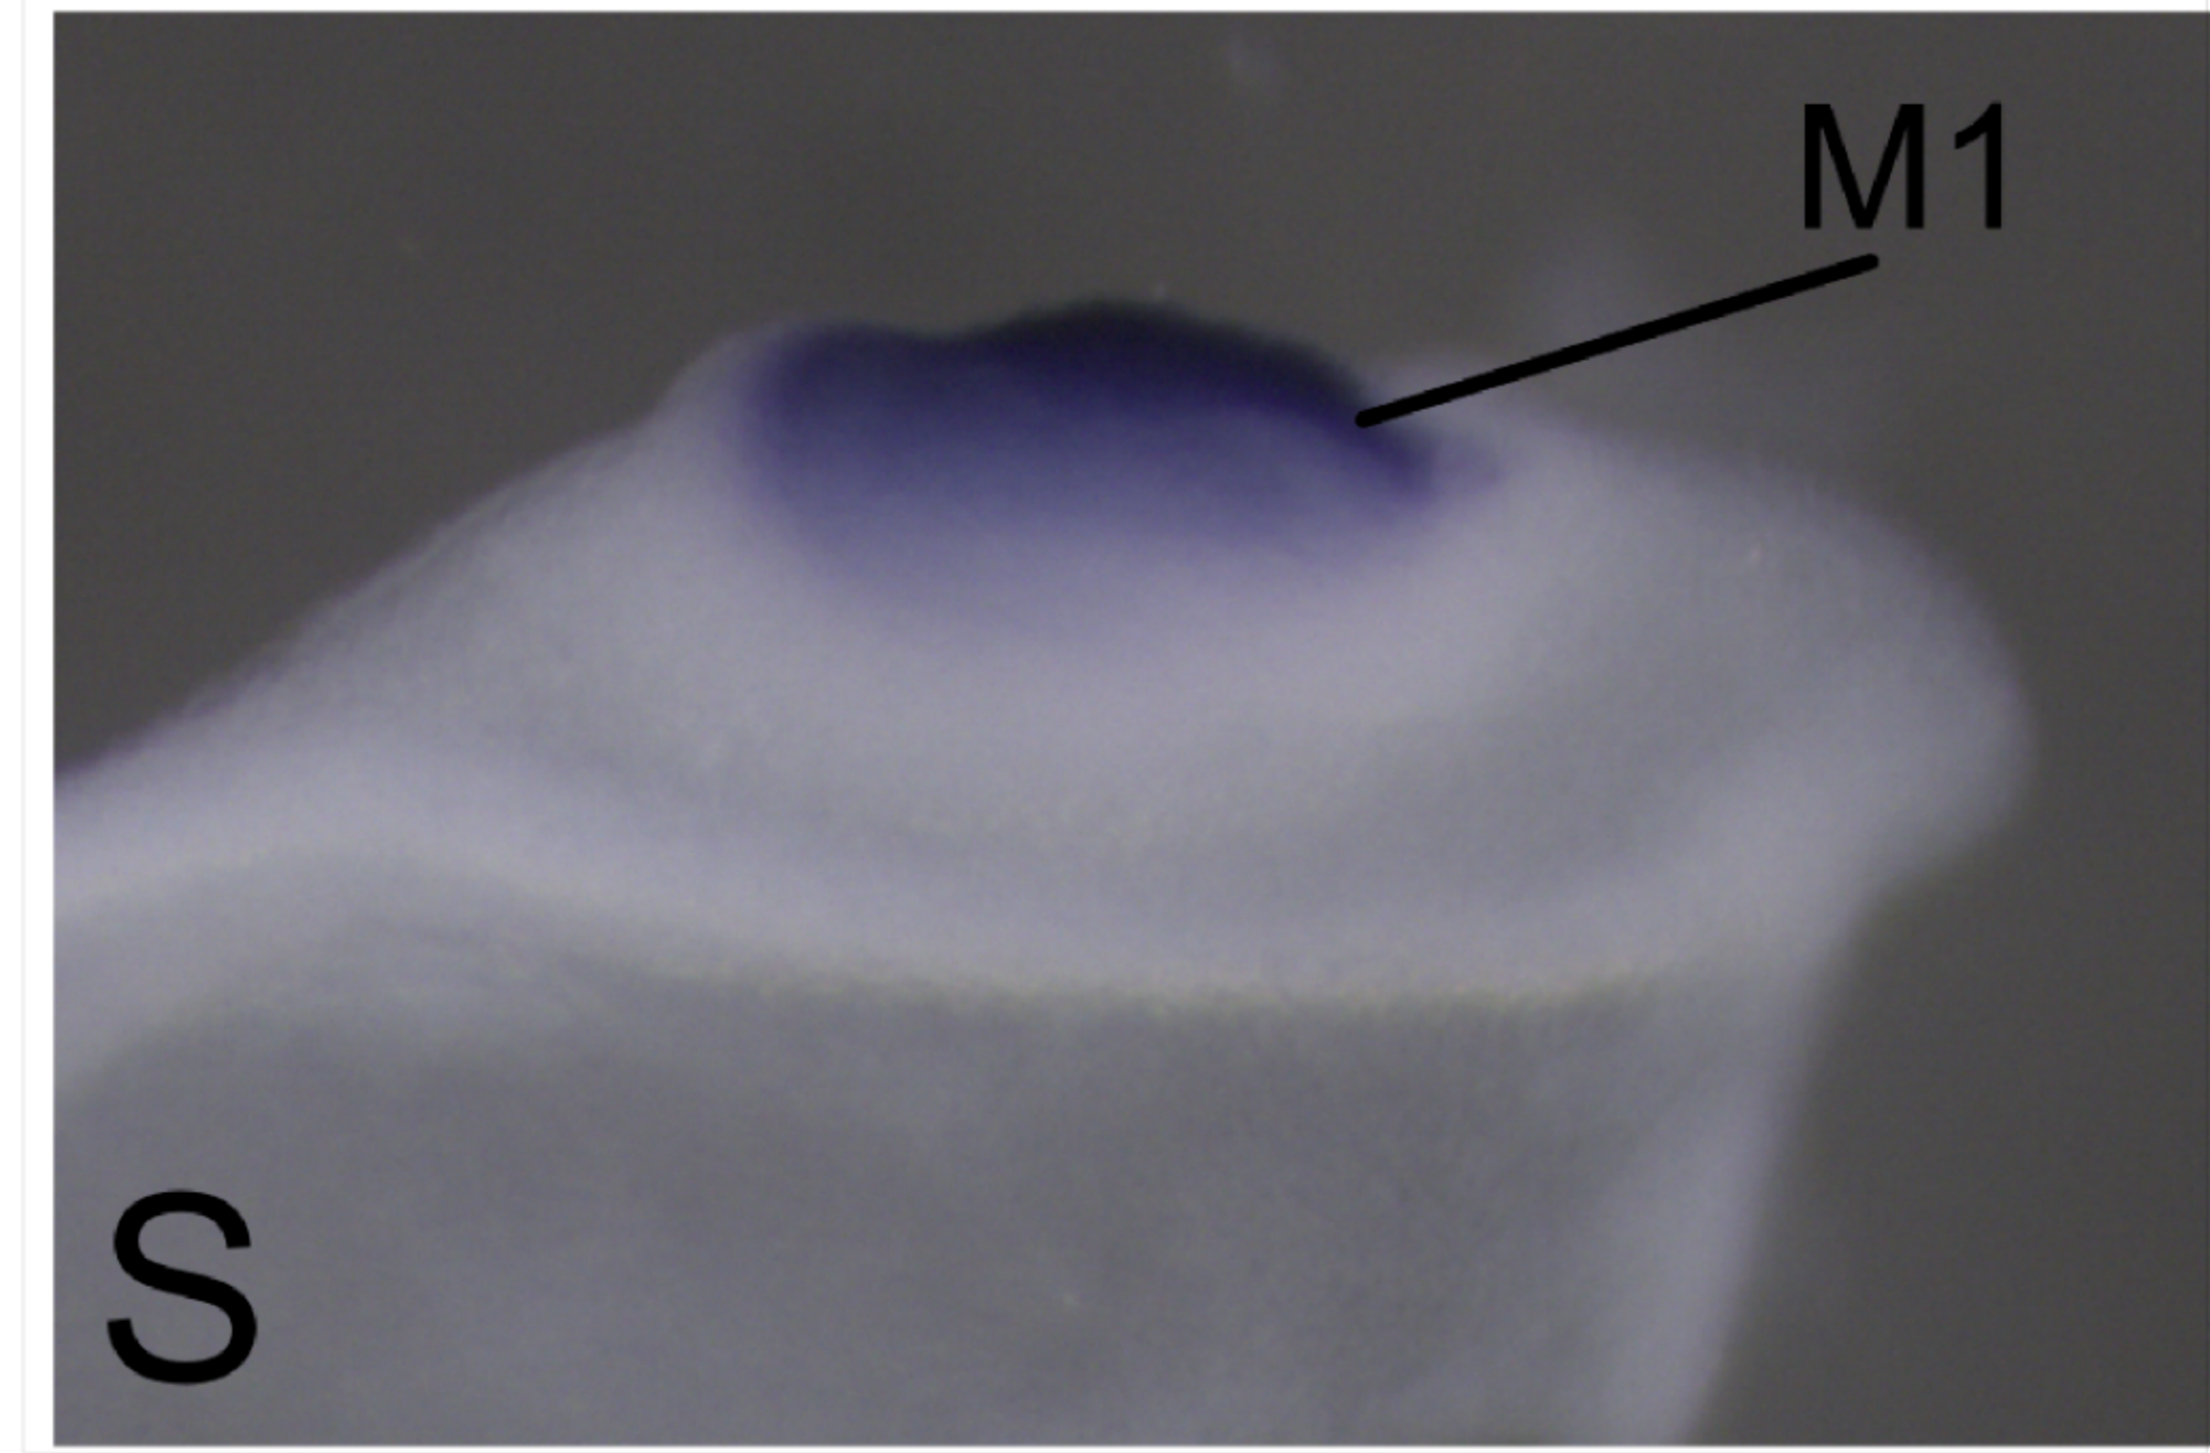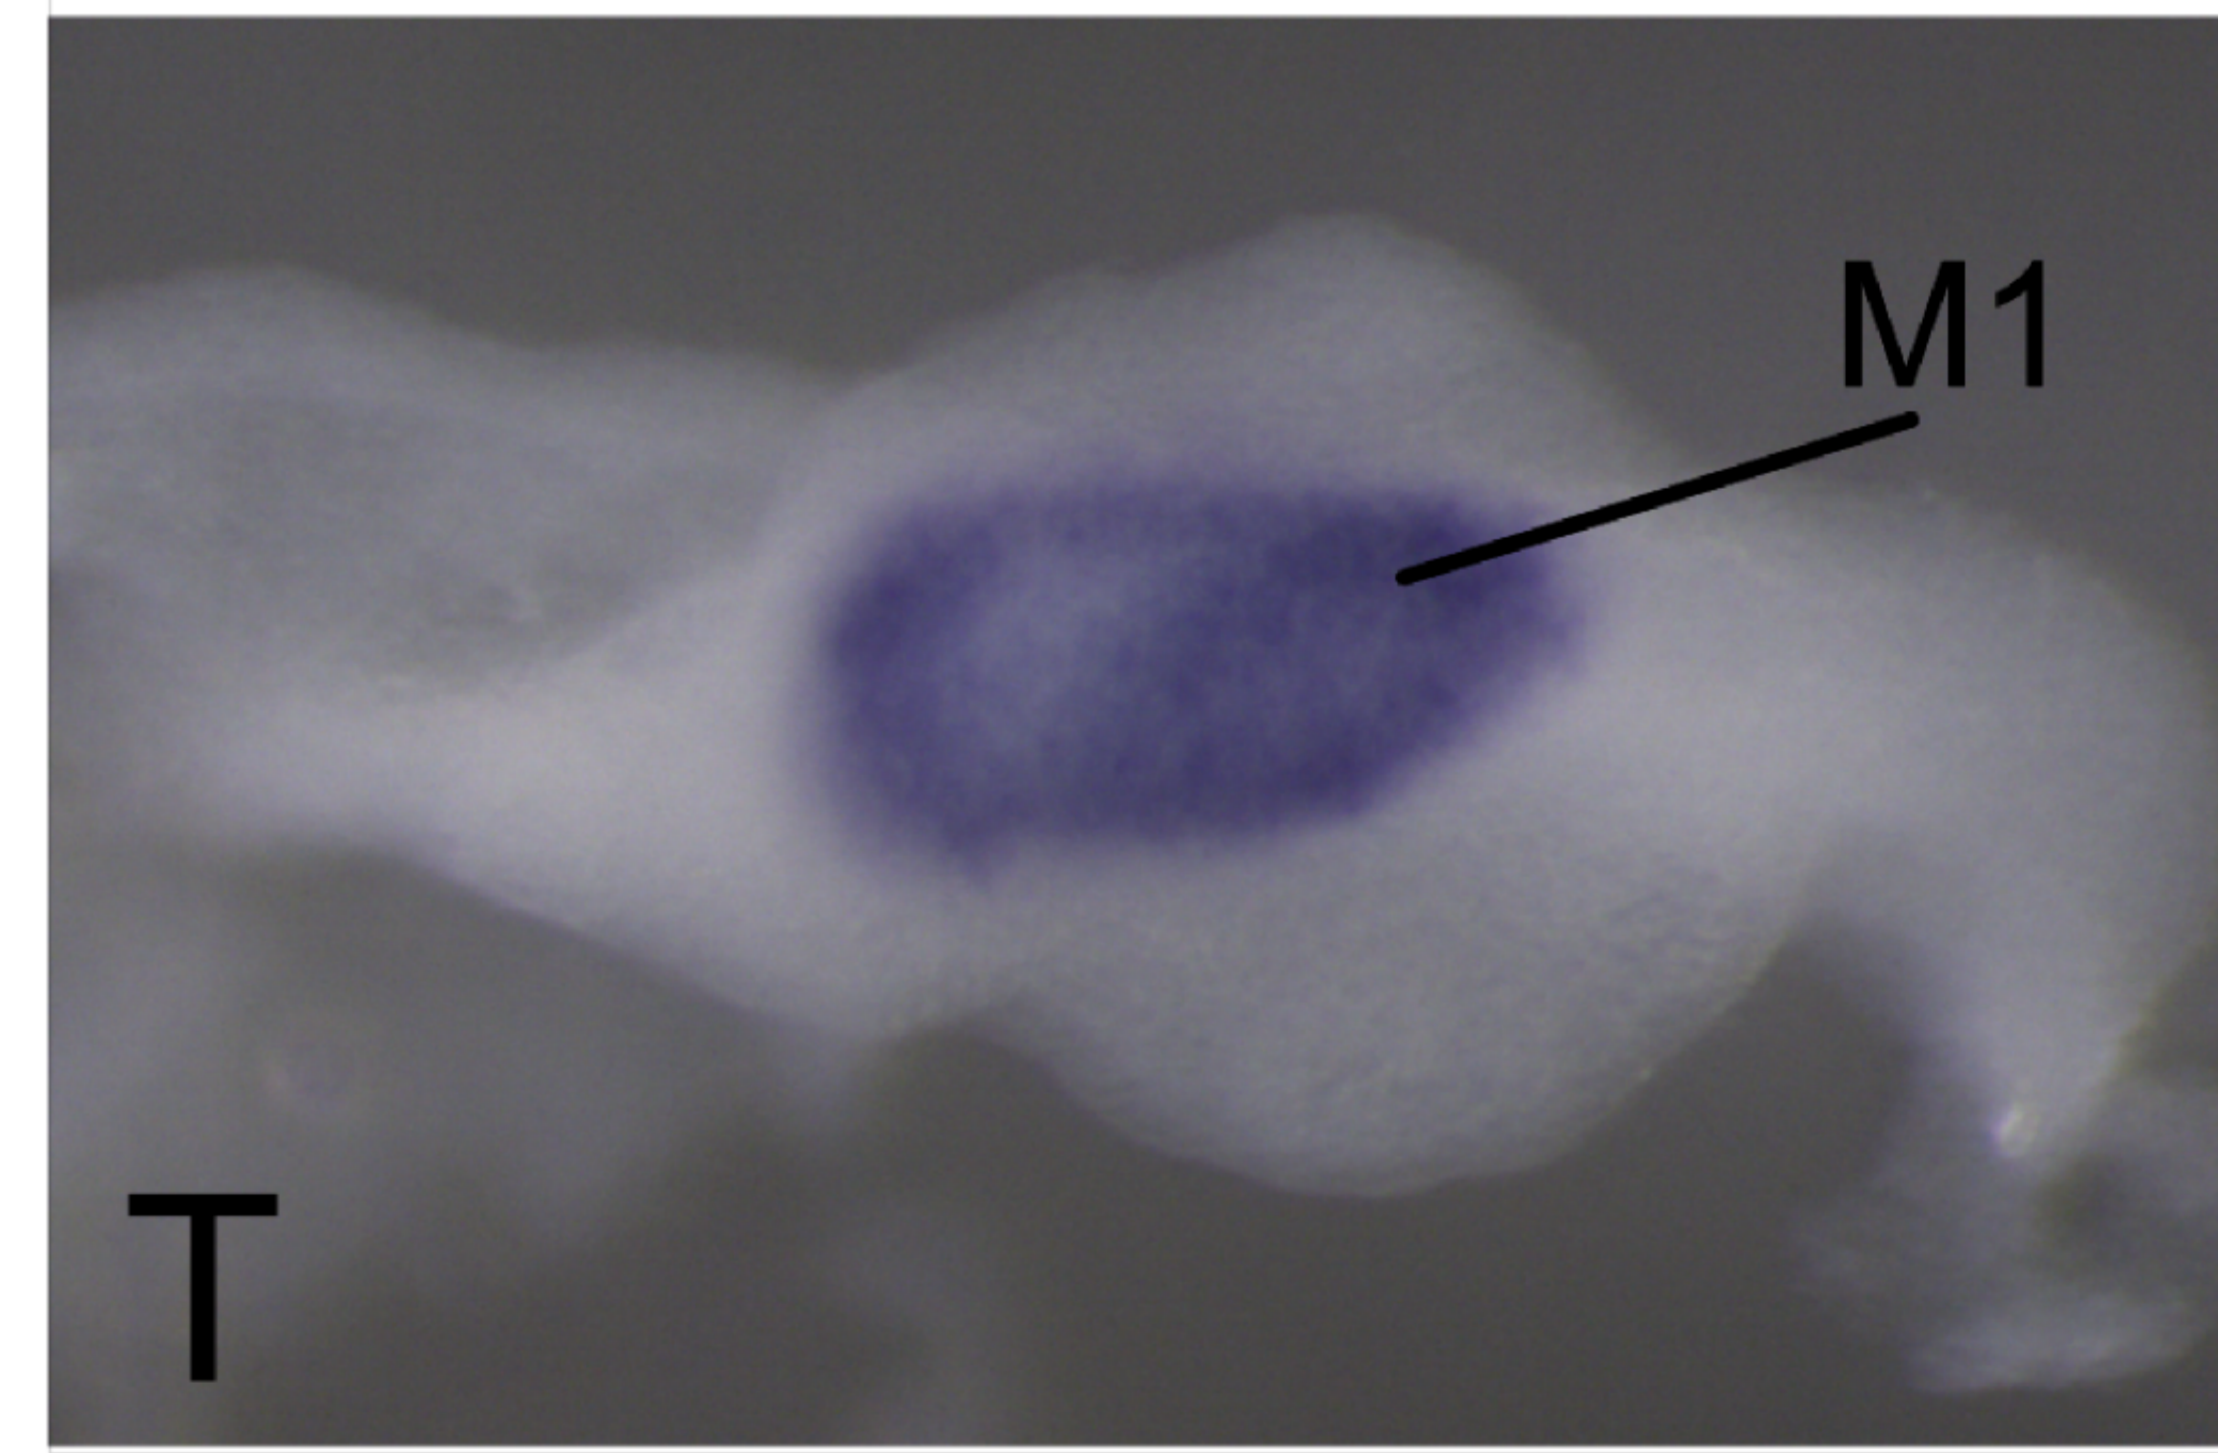

200  $\mu$ m

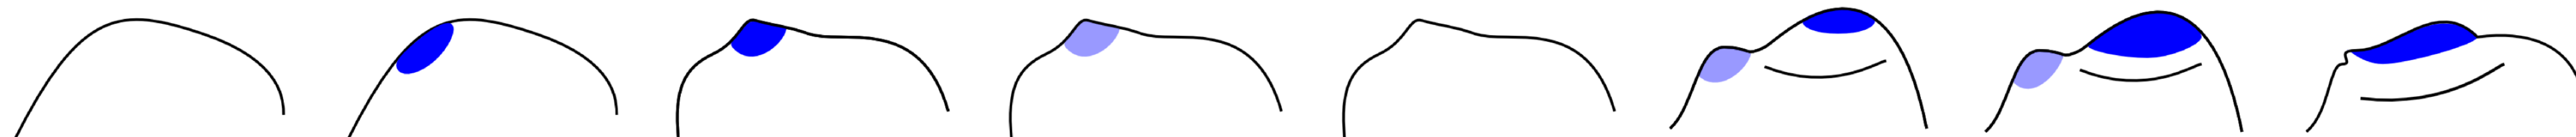

DUHi series

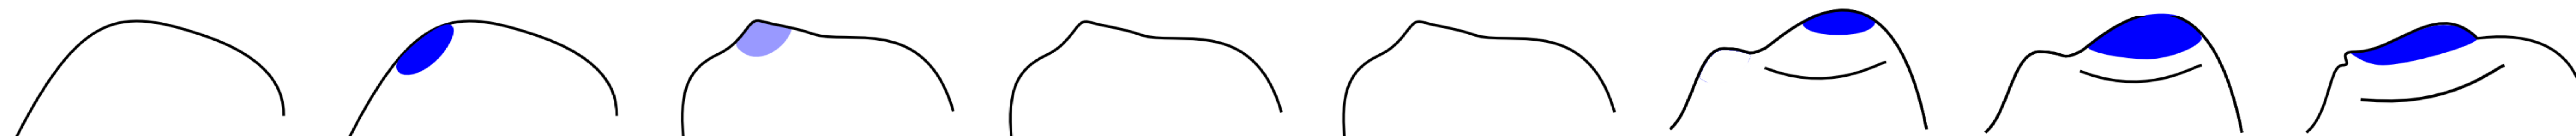

FVB series

U

Anterior

Posterior

Supplement: supp [file elife-50103-supp-v1.zip › elife_poa_e50103_Figure_2_figure_supplement_1.pdf]

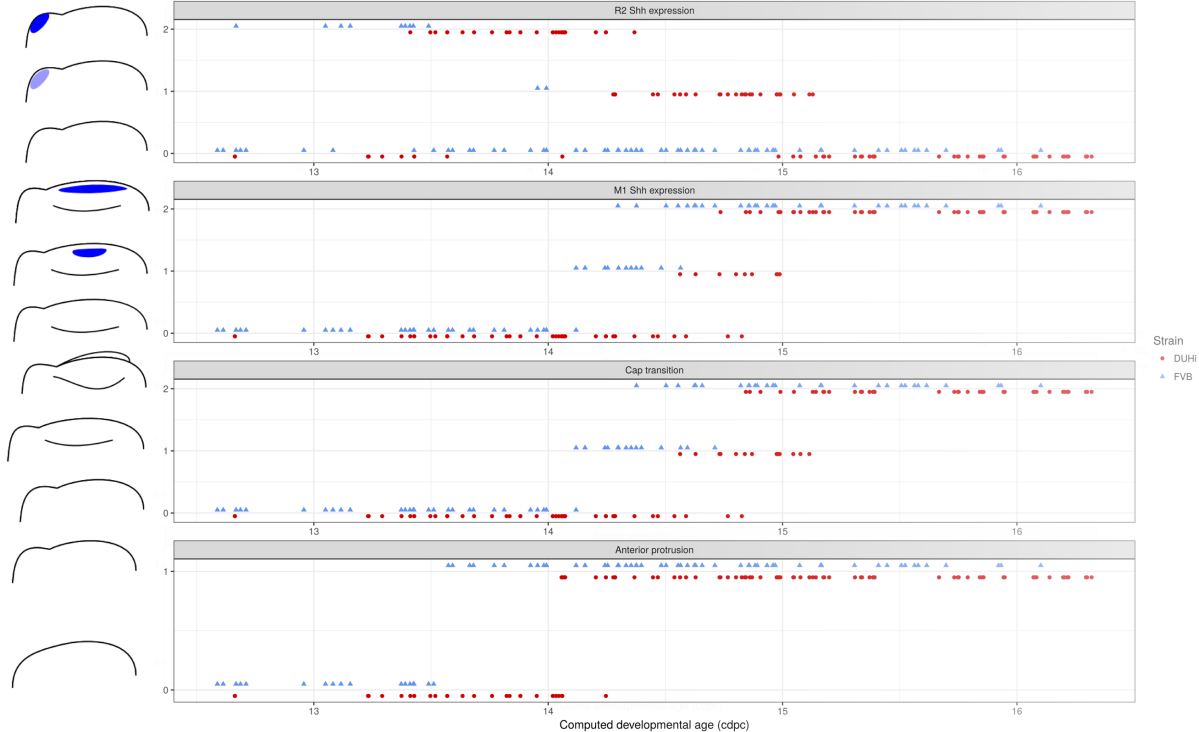

Supplement: supp [file elife-50103-supp-v1.zip › elife_poa_e50103_Figure_3_figure_supplement_1.pdf]

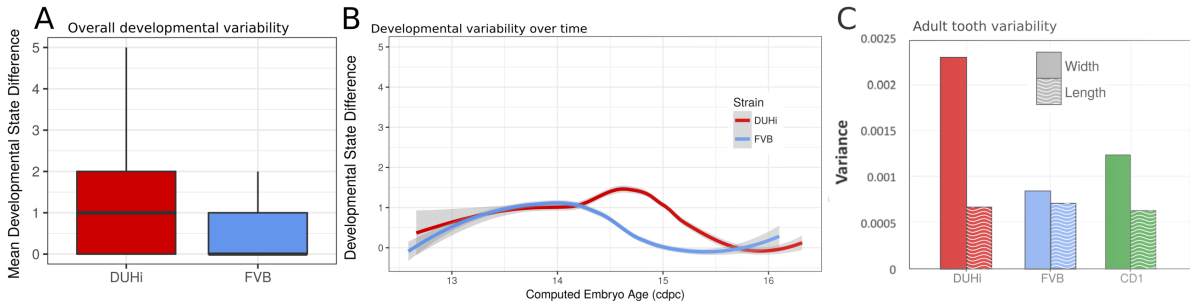

Supplement: supp [file elife-50103-supp-v1.zip › elife_poa_e50103_Figure_6_figure_supplement_1.pdf]

DUHi lower molars

15.25 cdpc

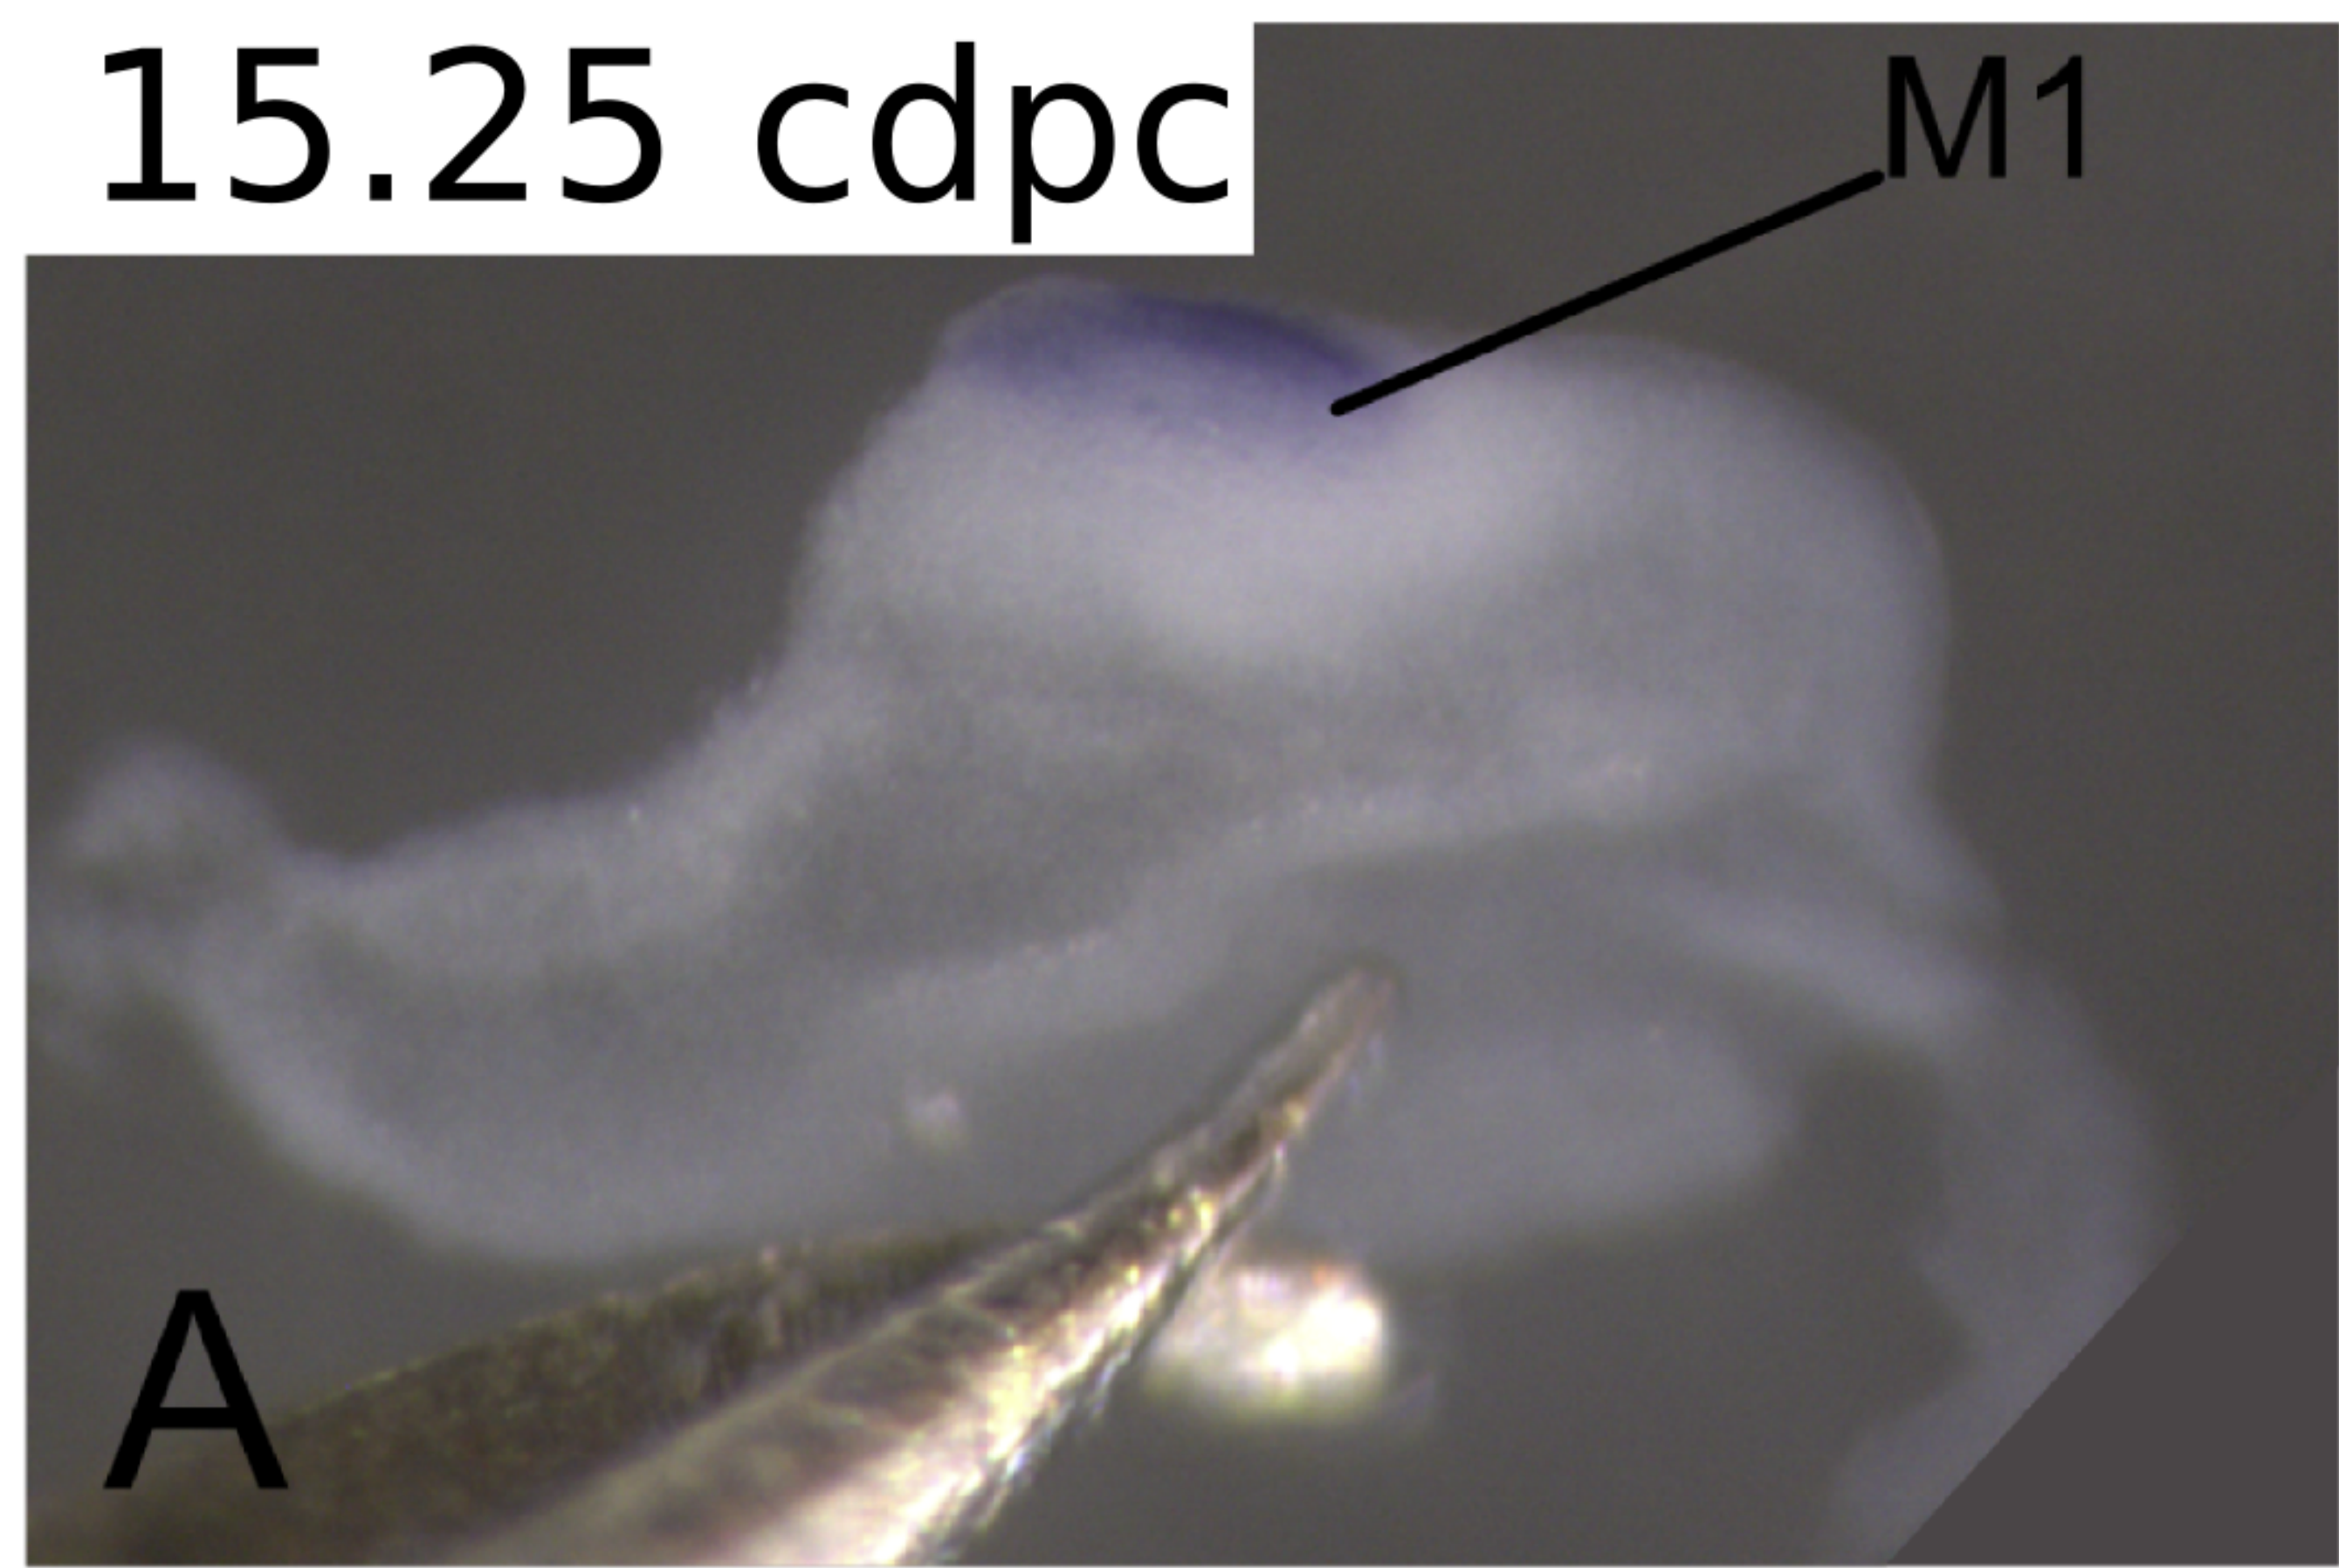

15.5 cdpc

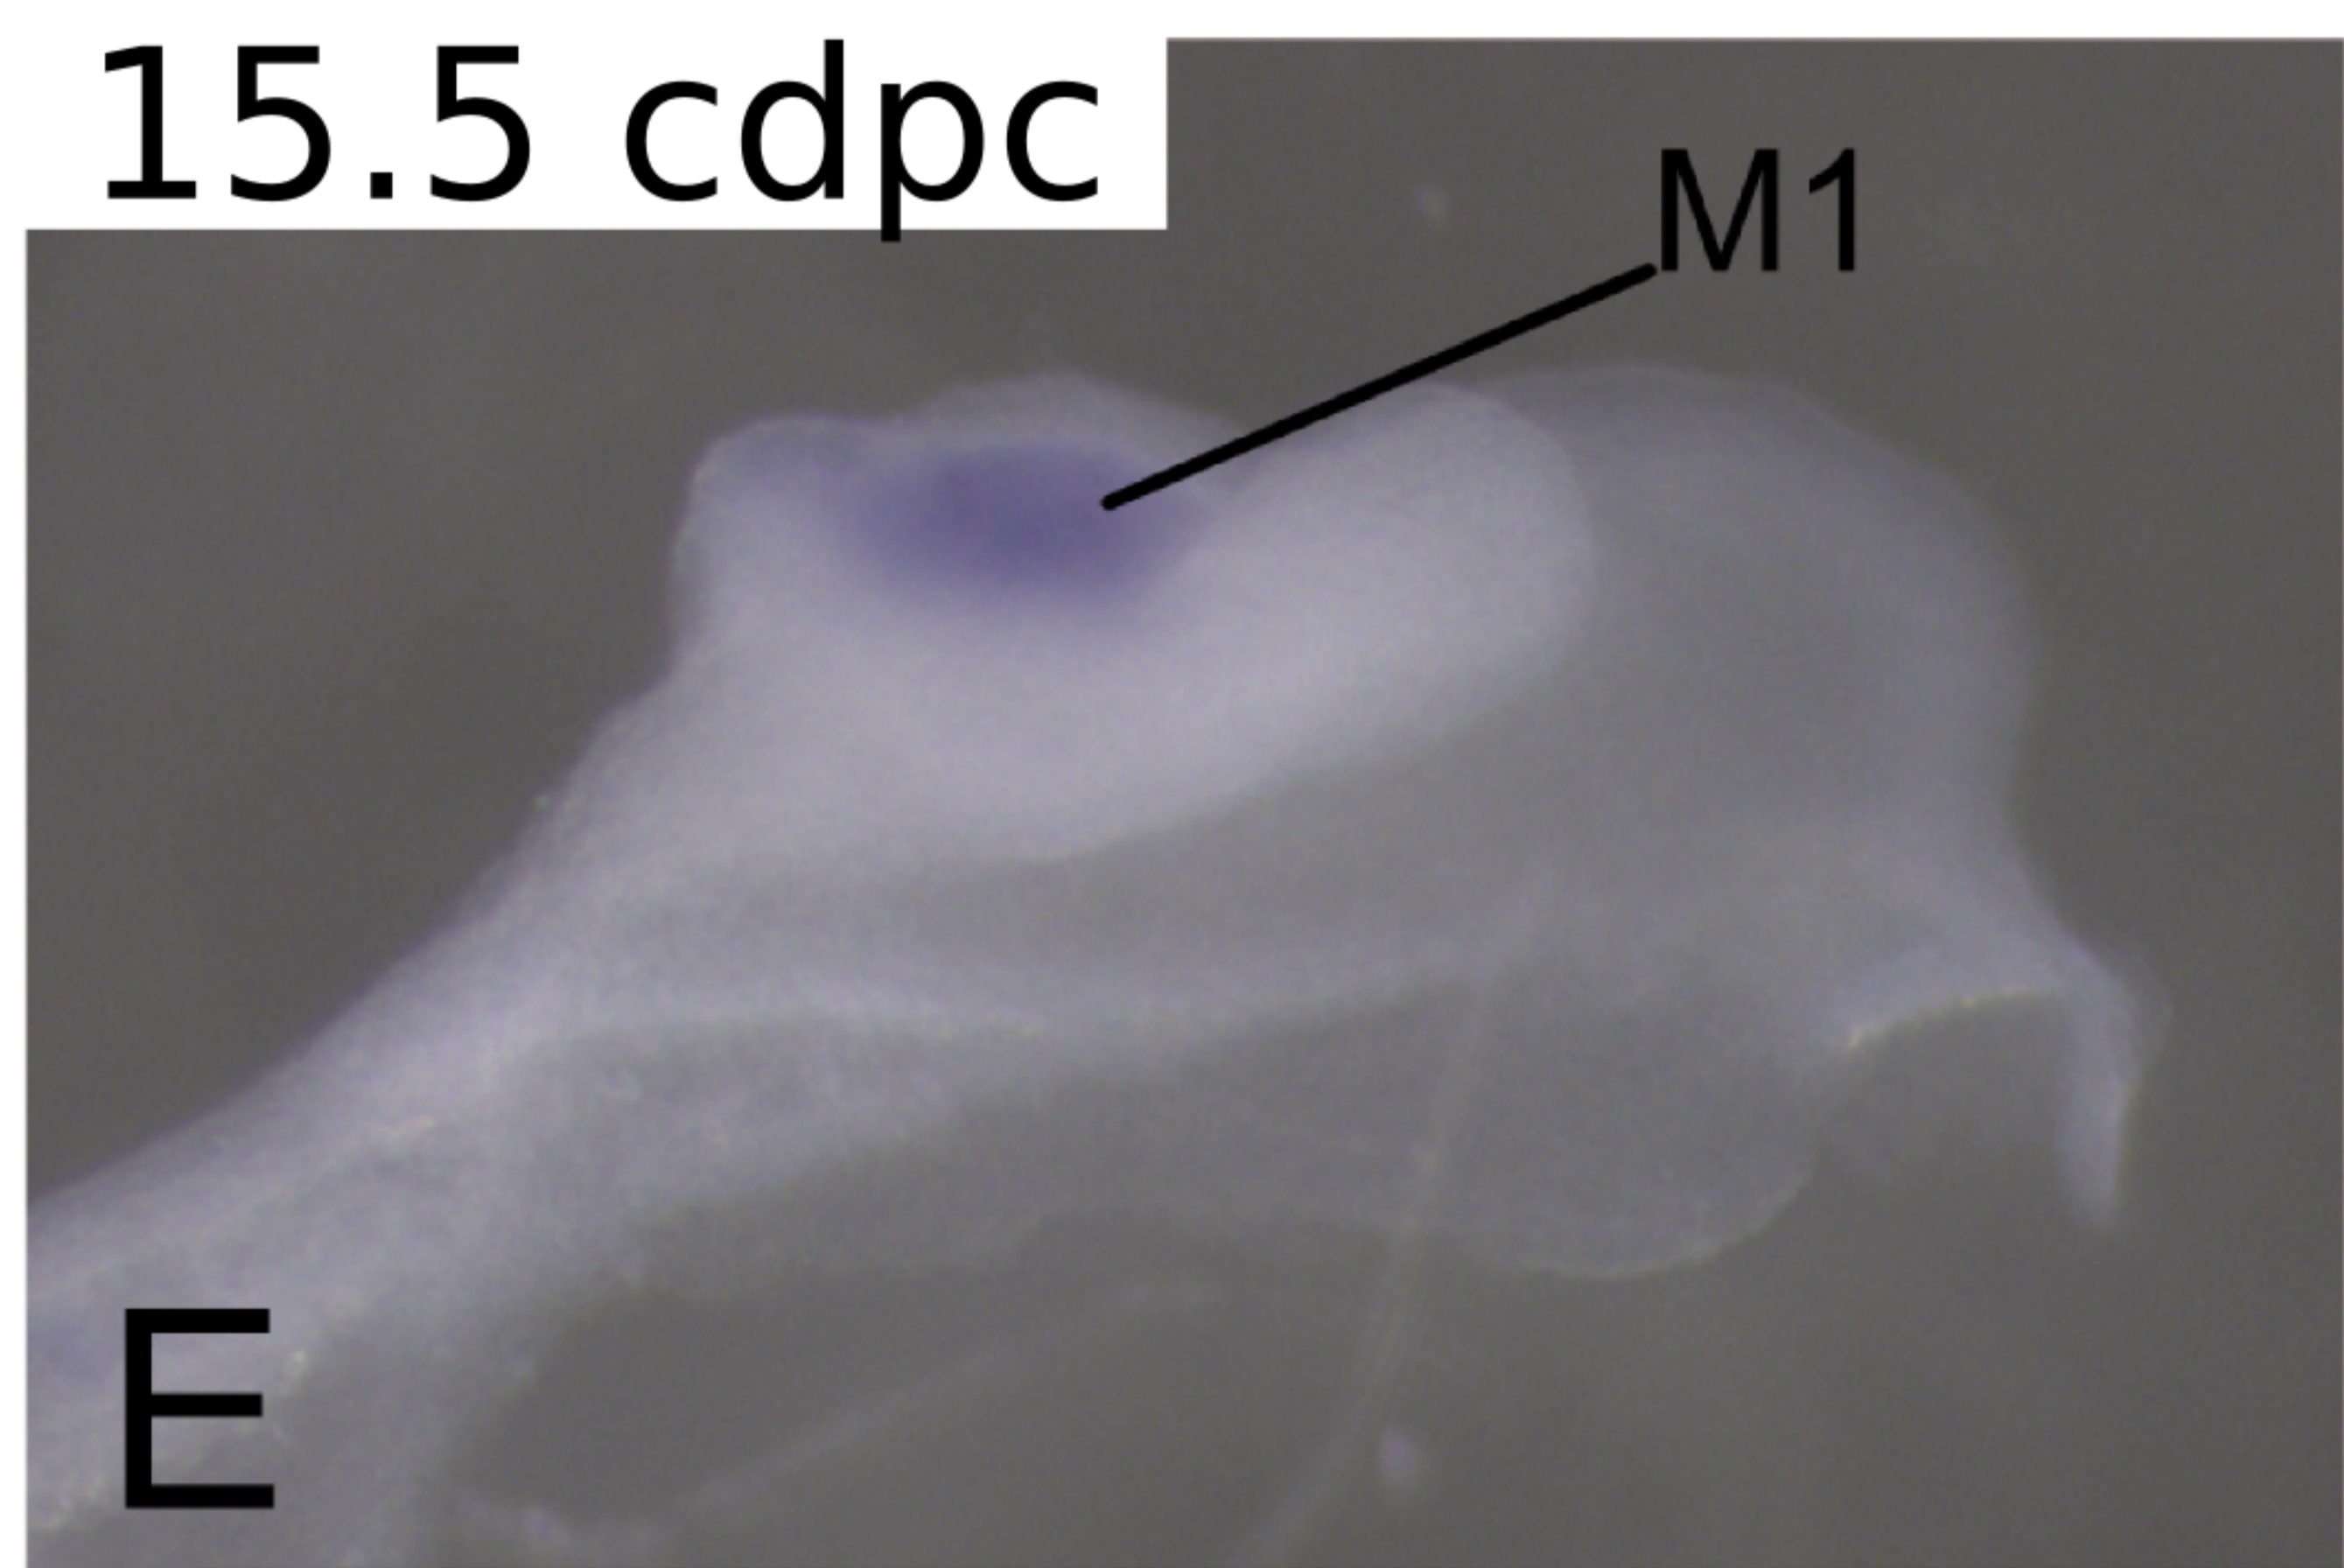

15.75 cdpc

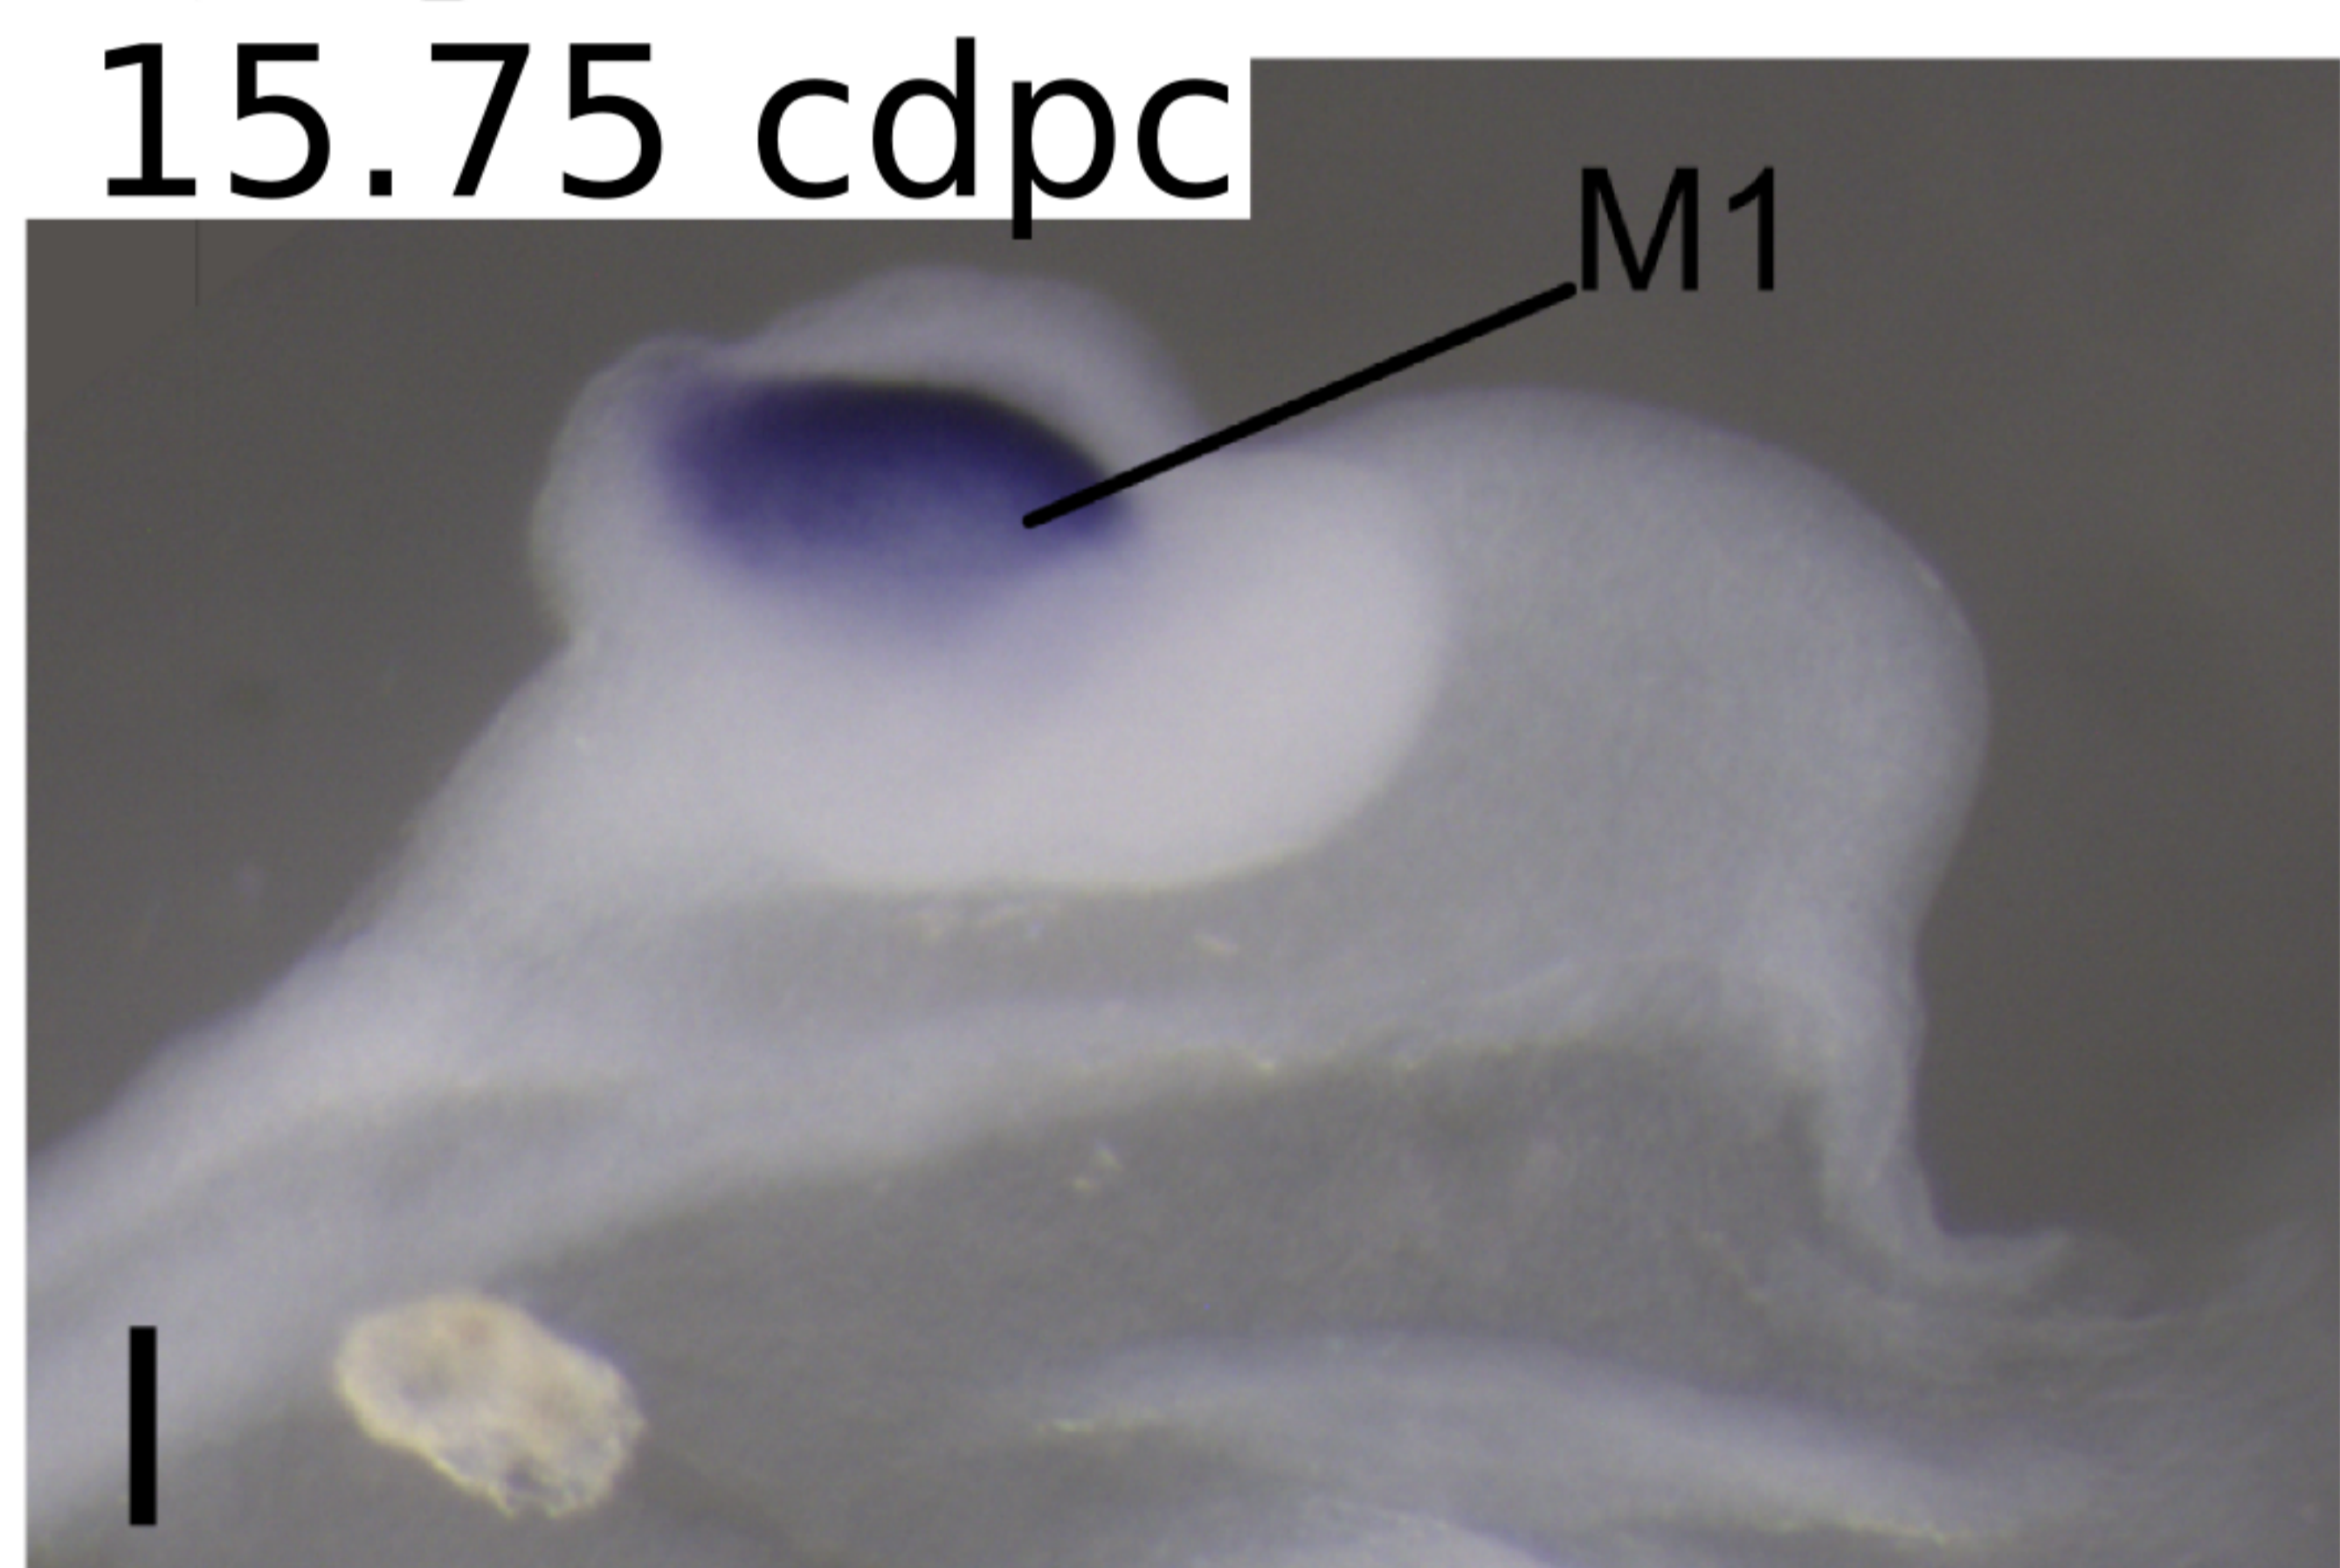

16.0 cdpc

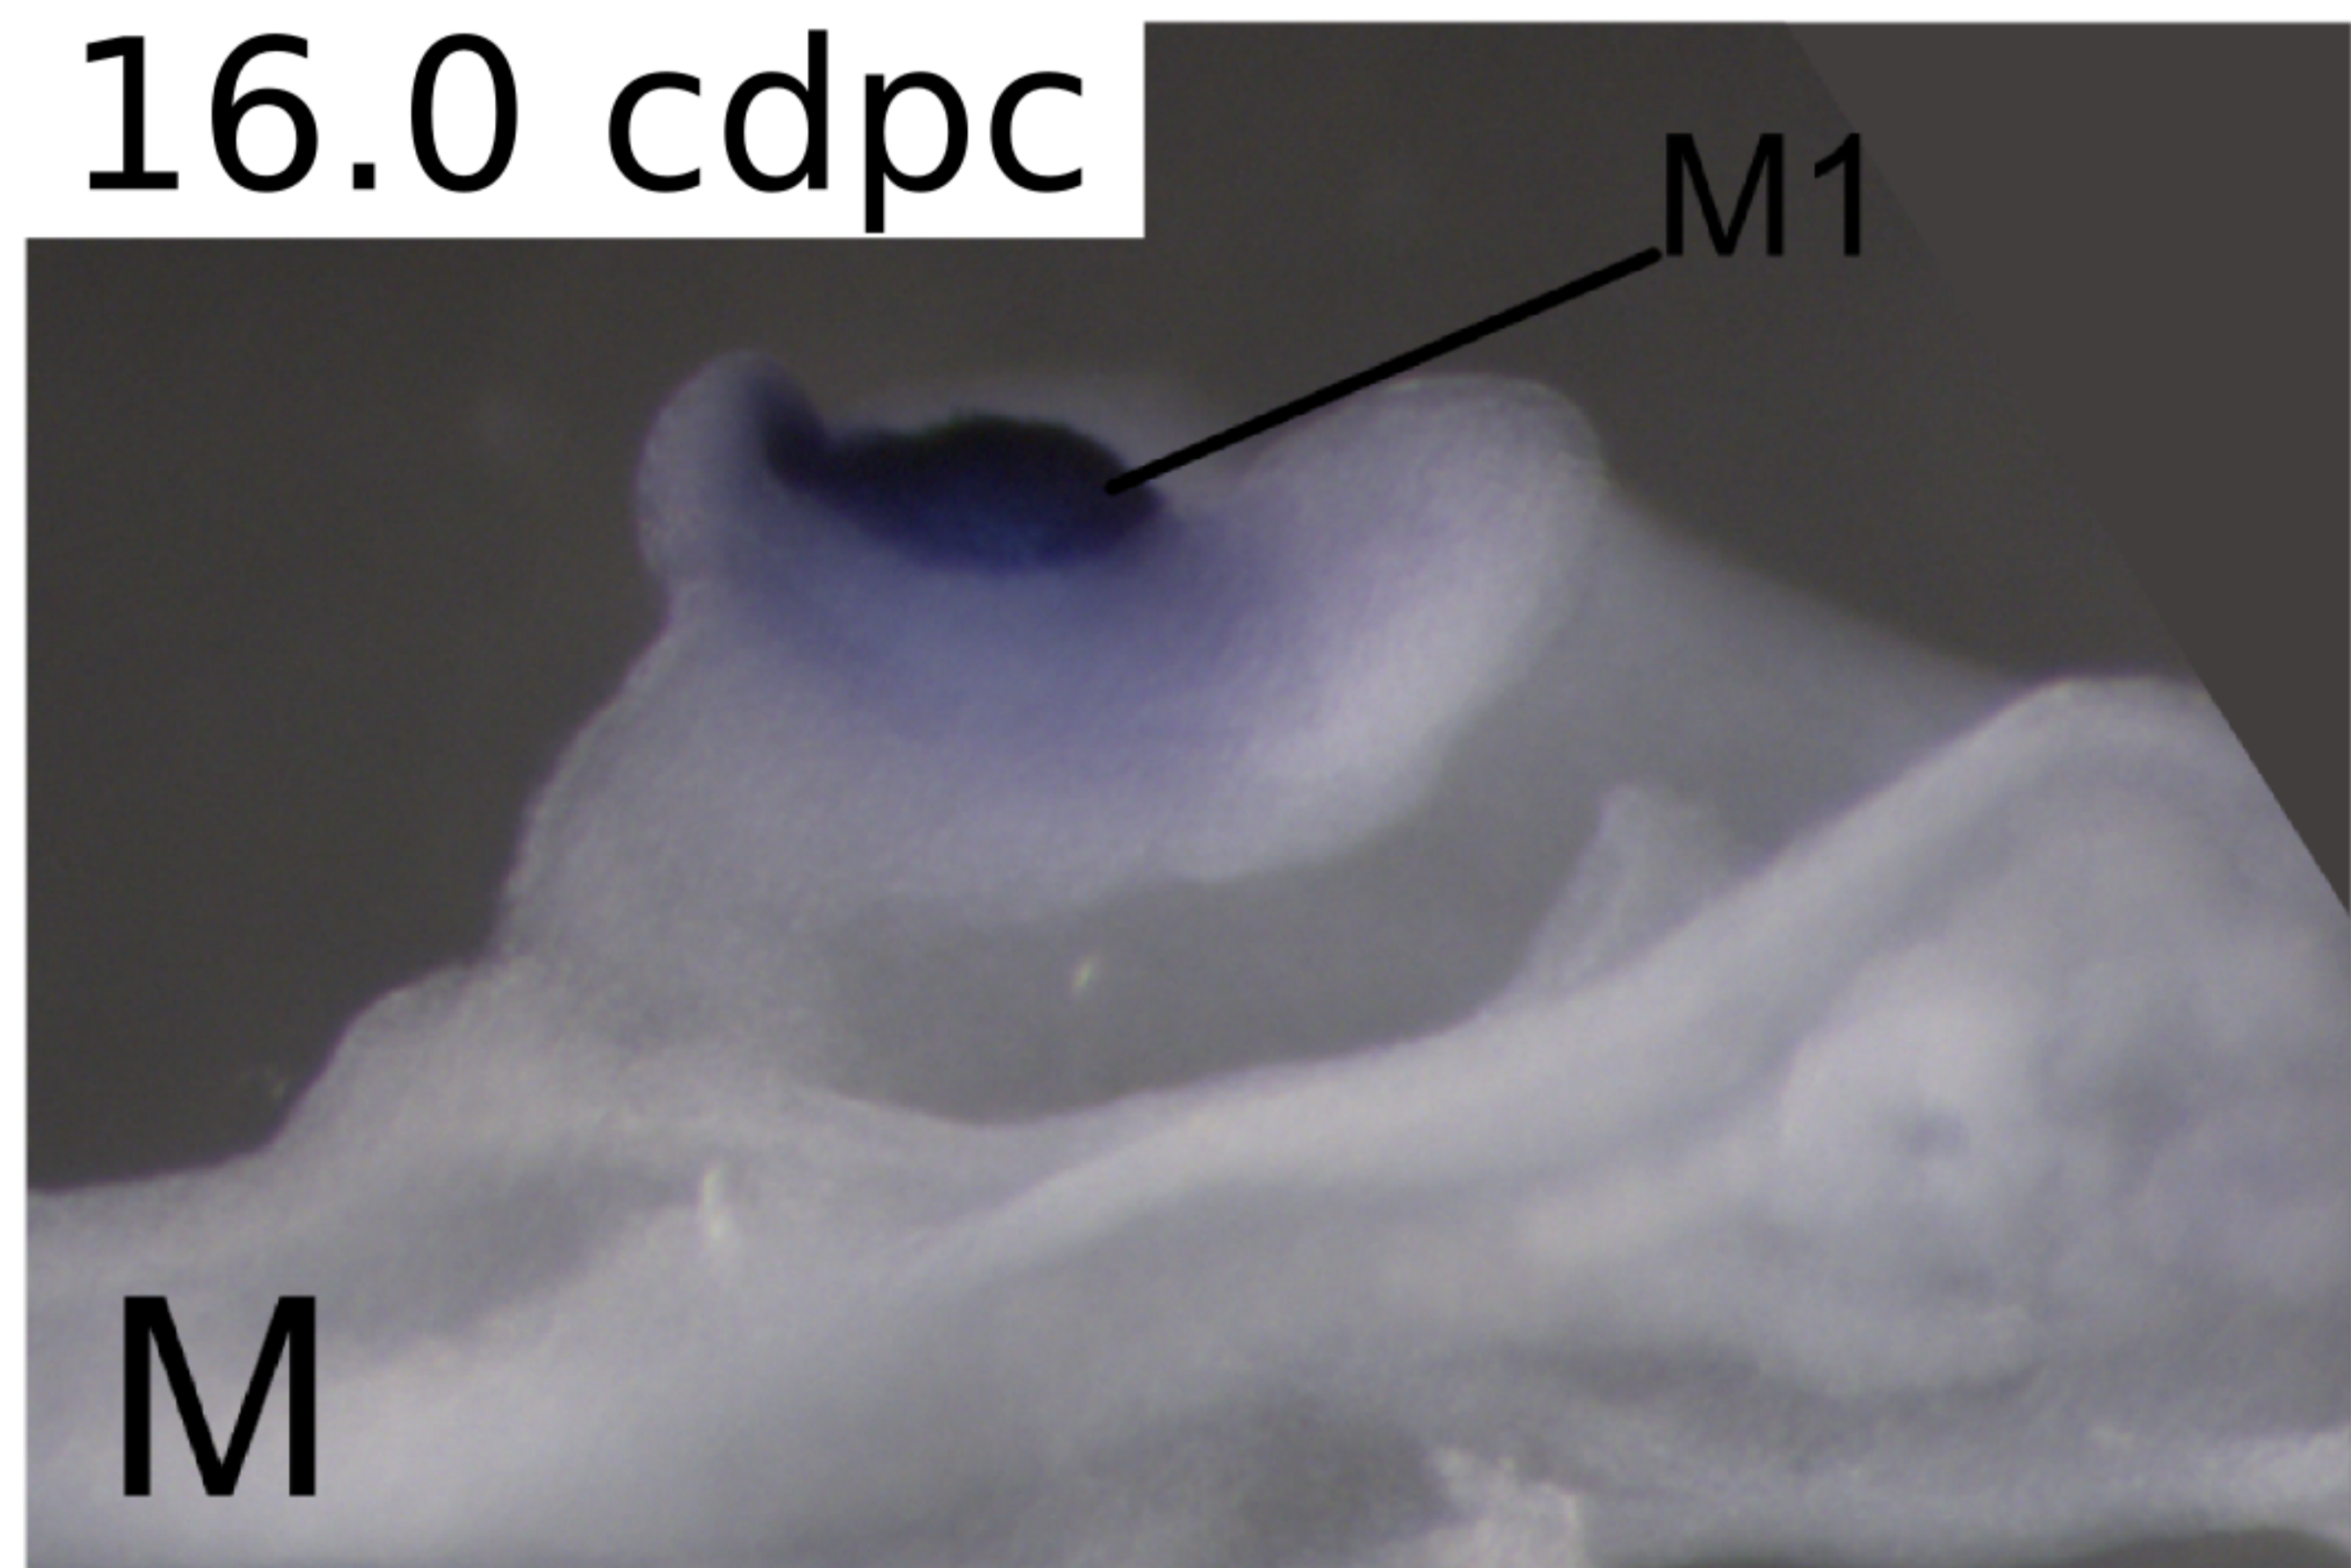

FVB lower molars

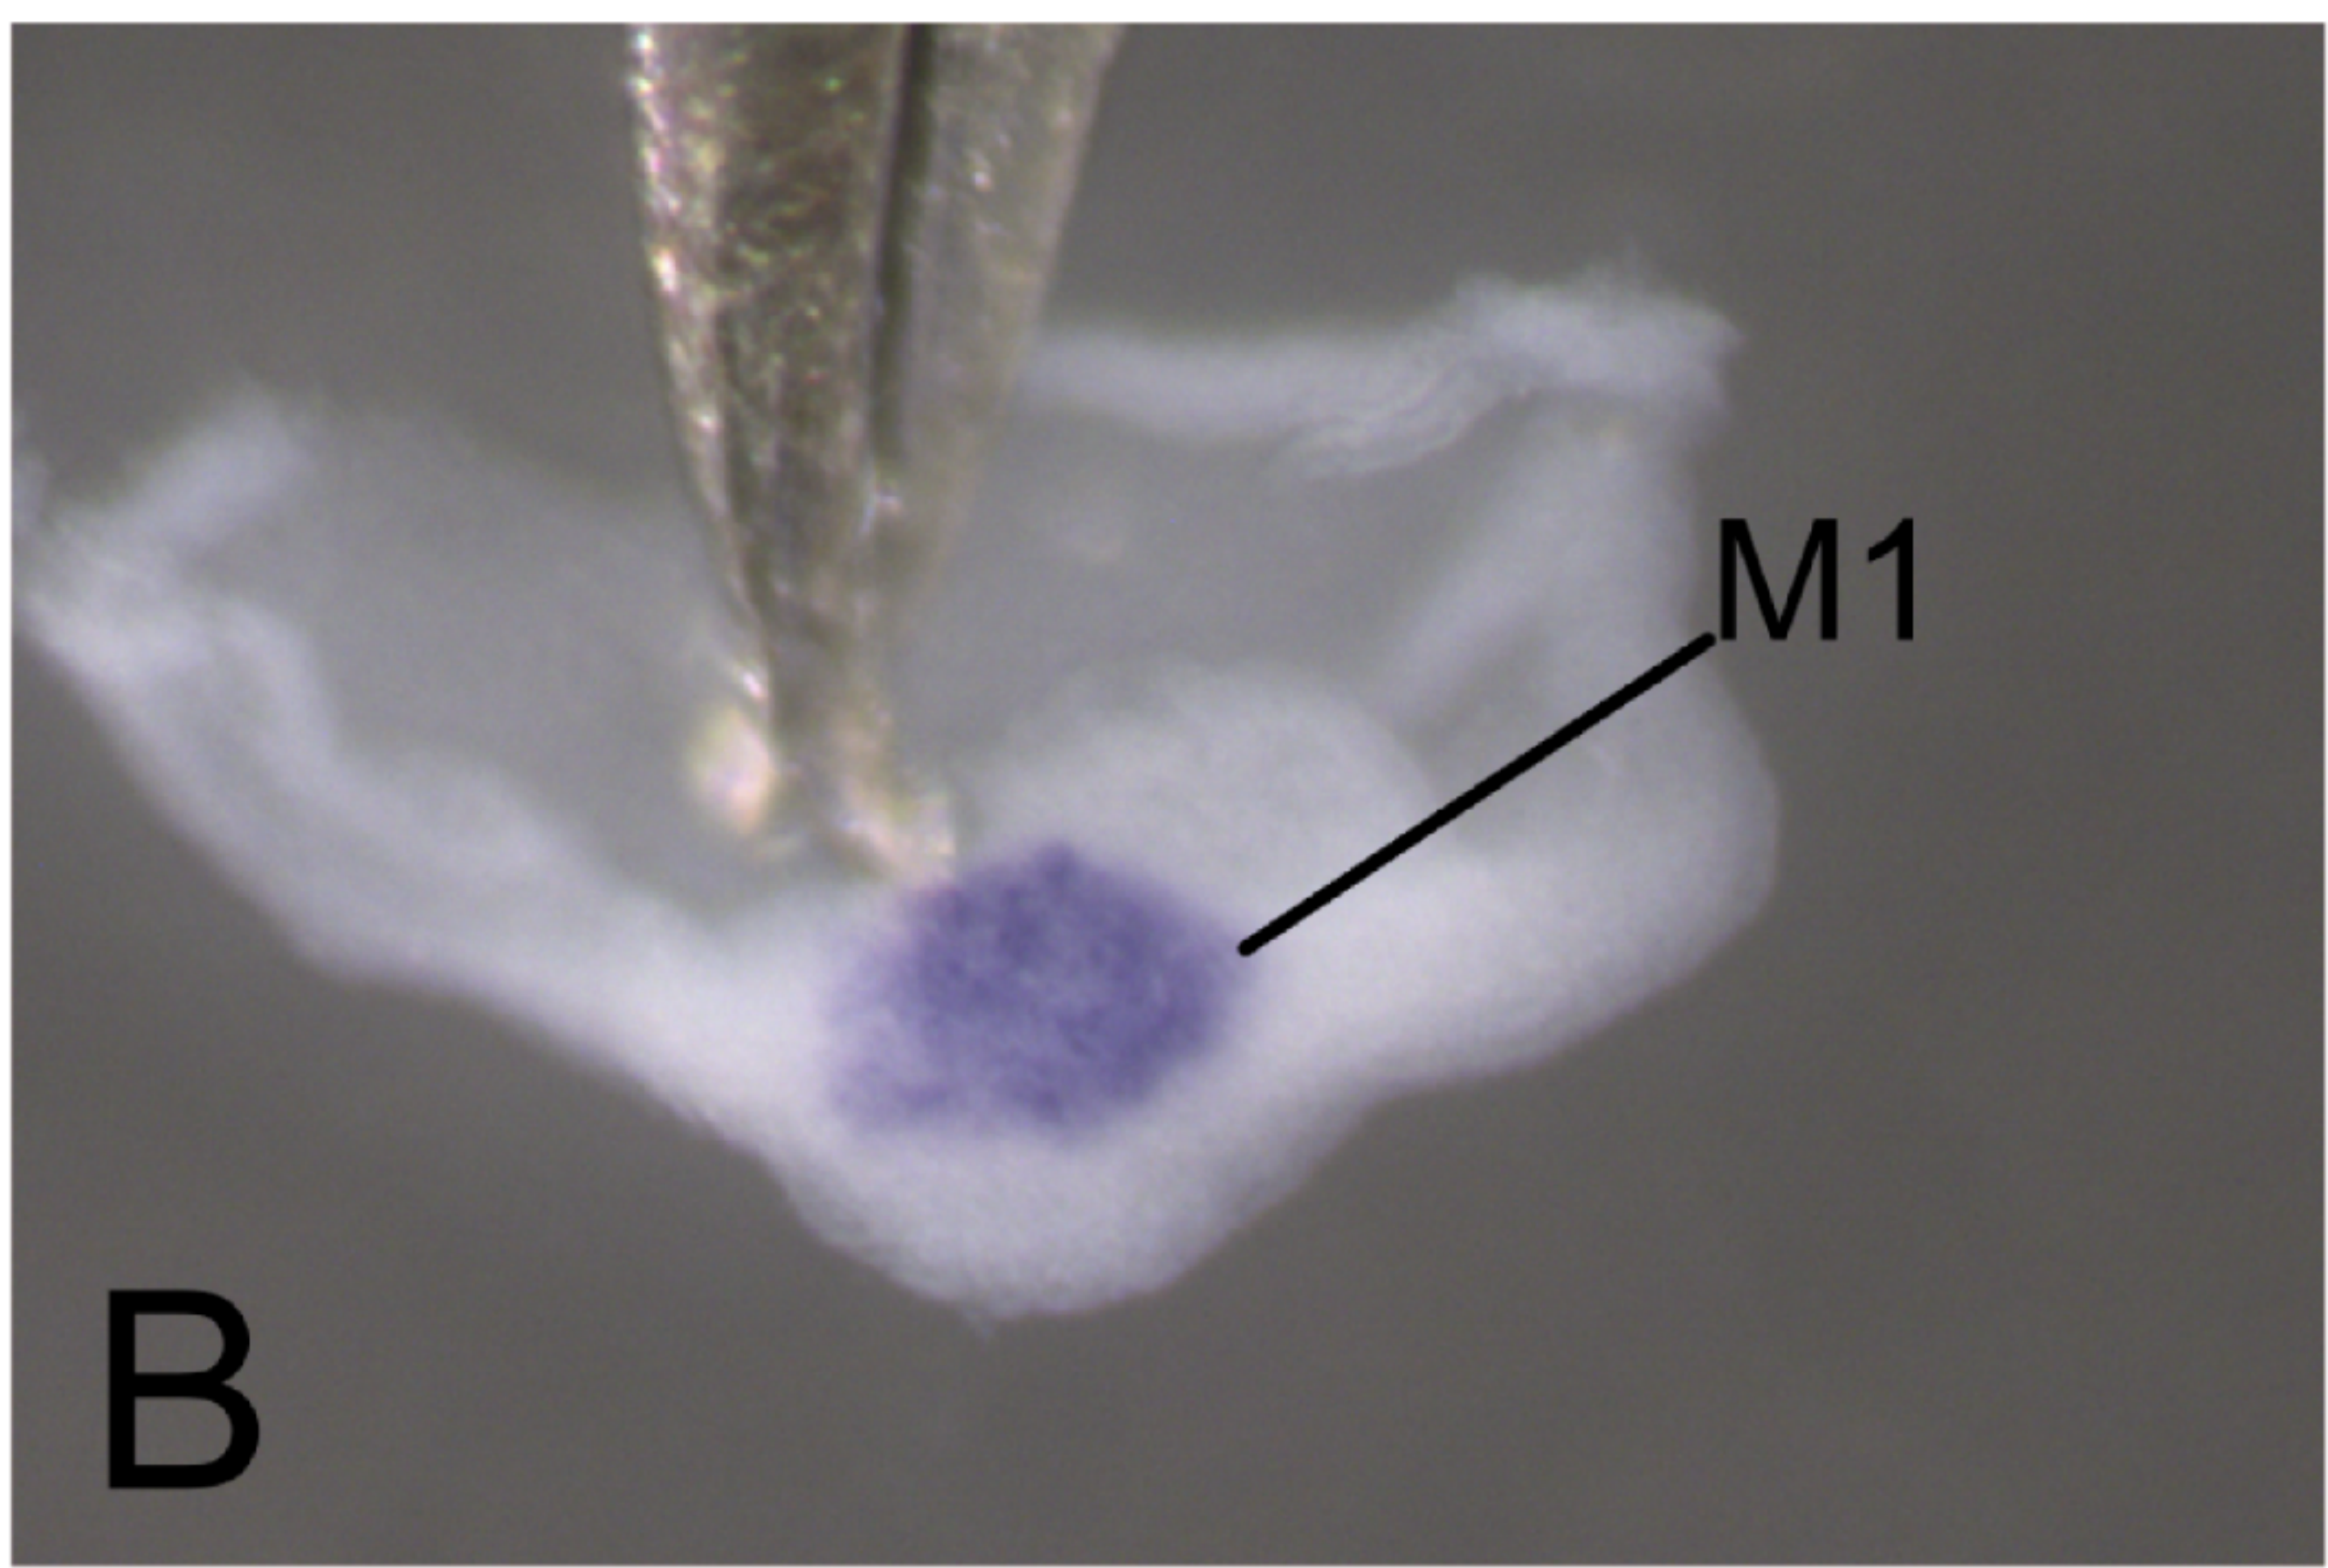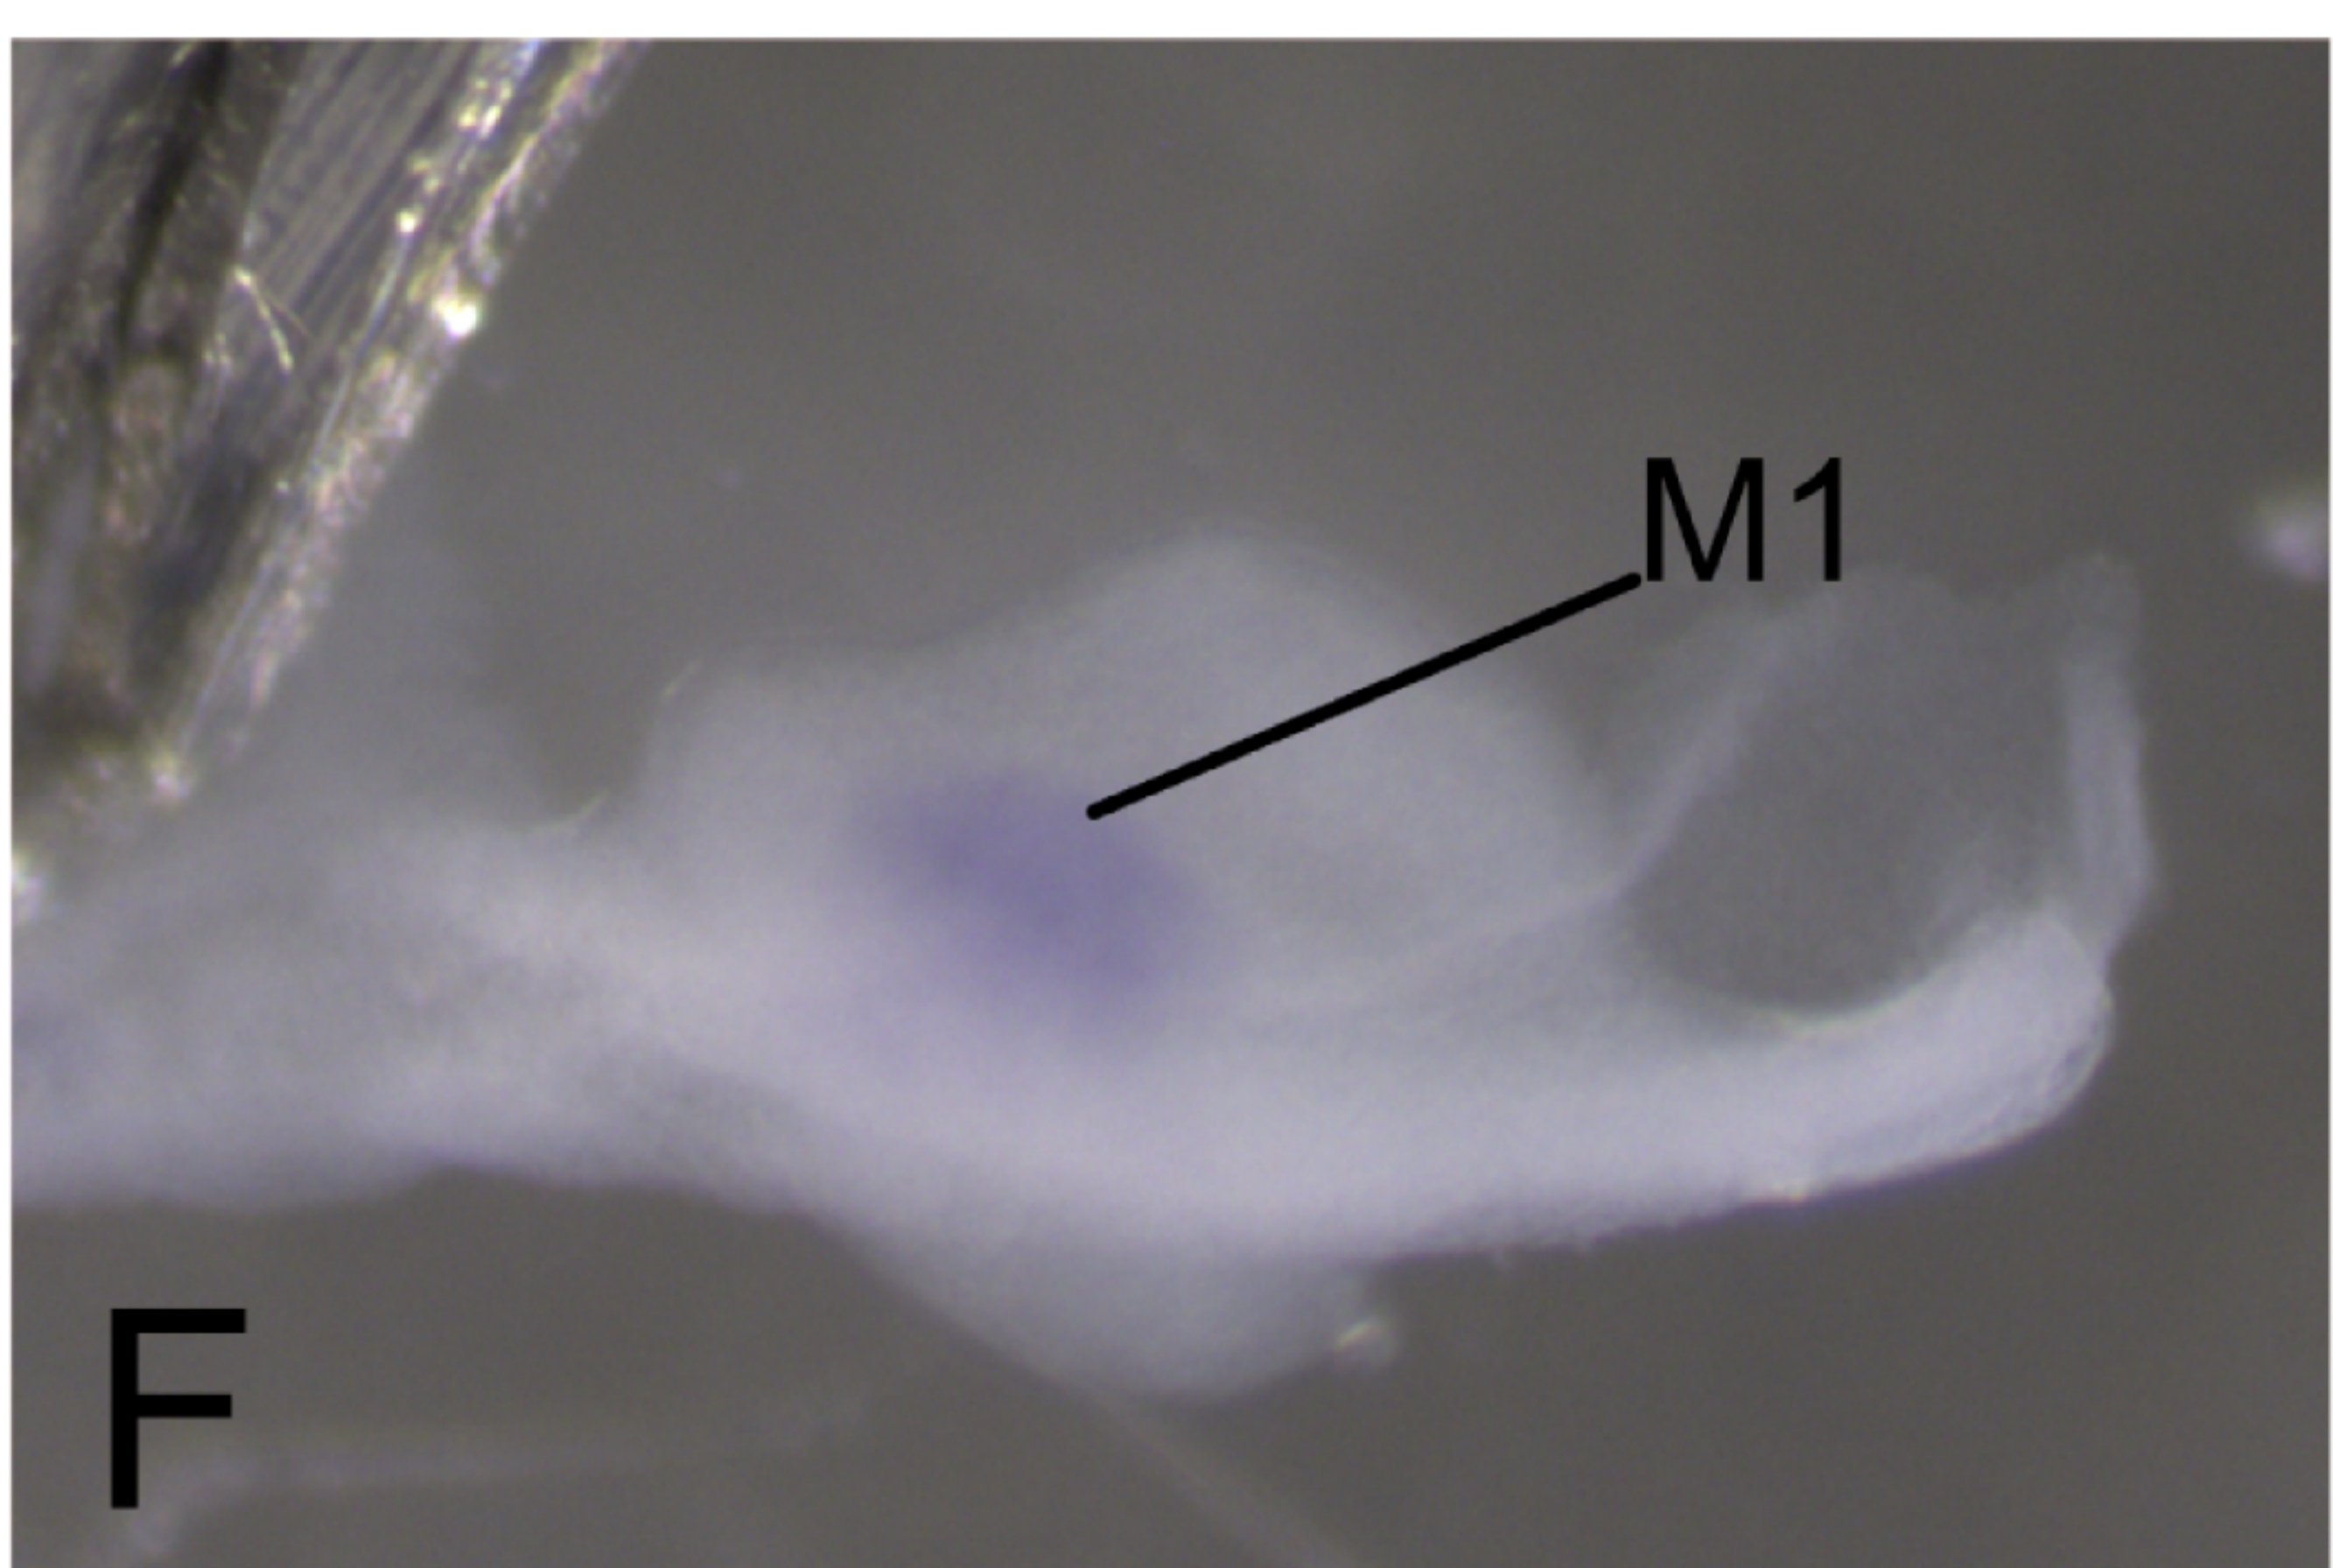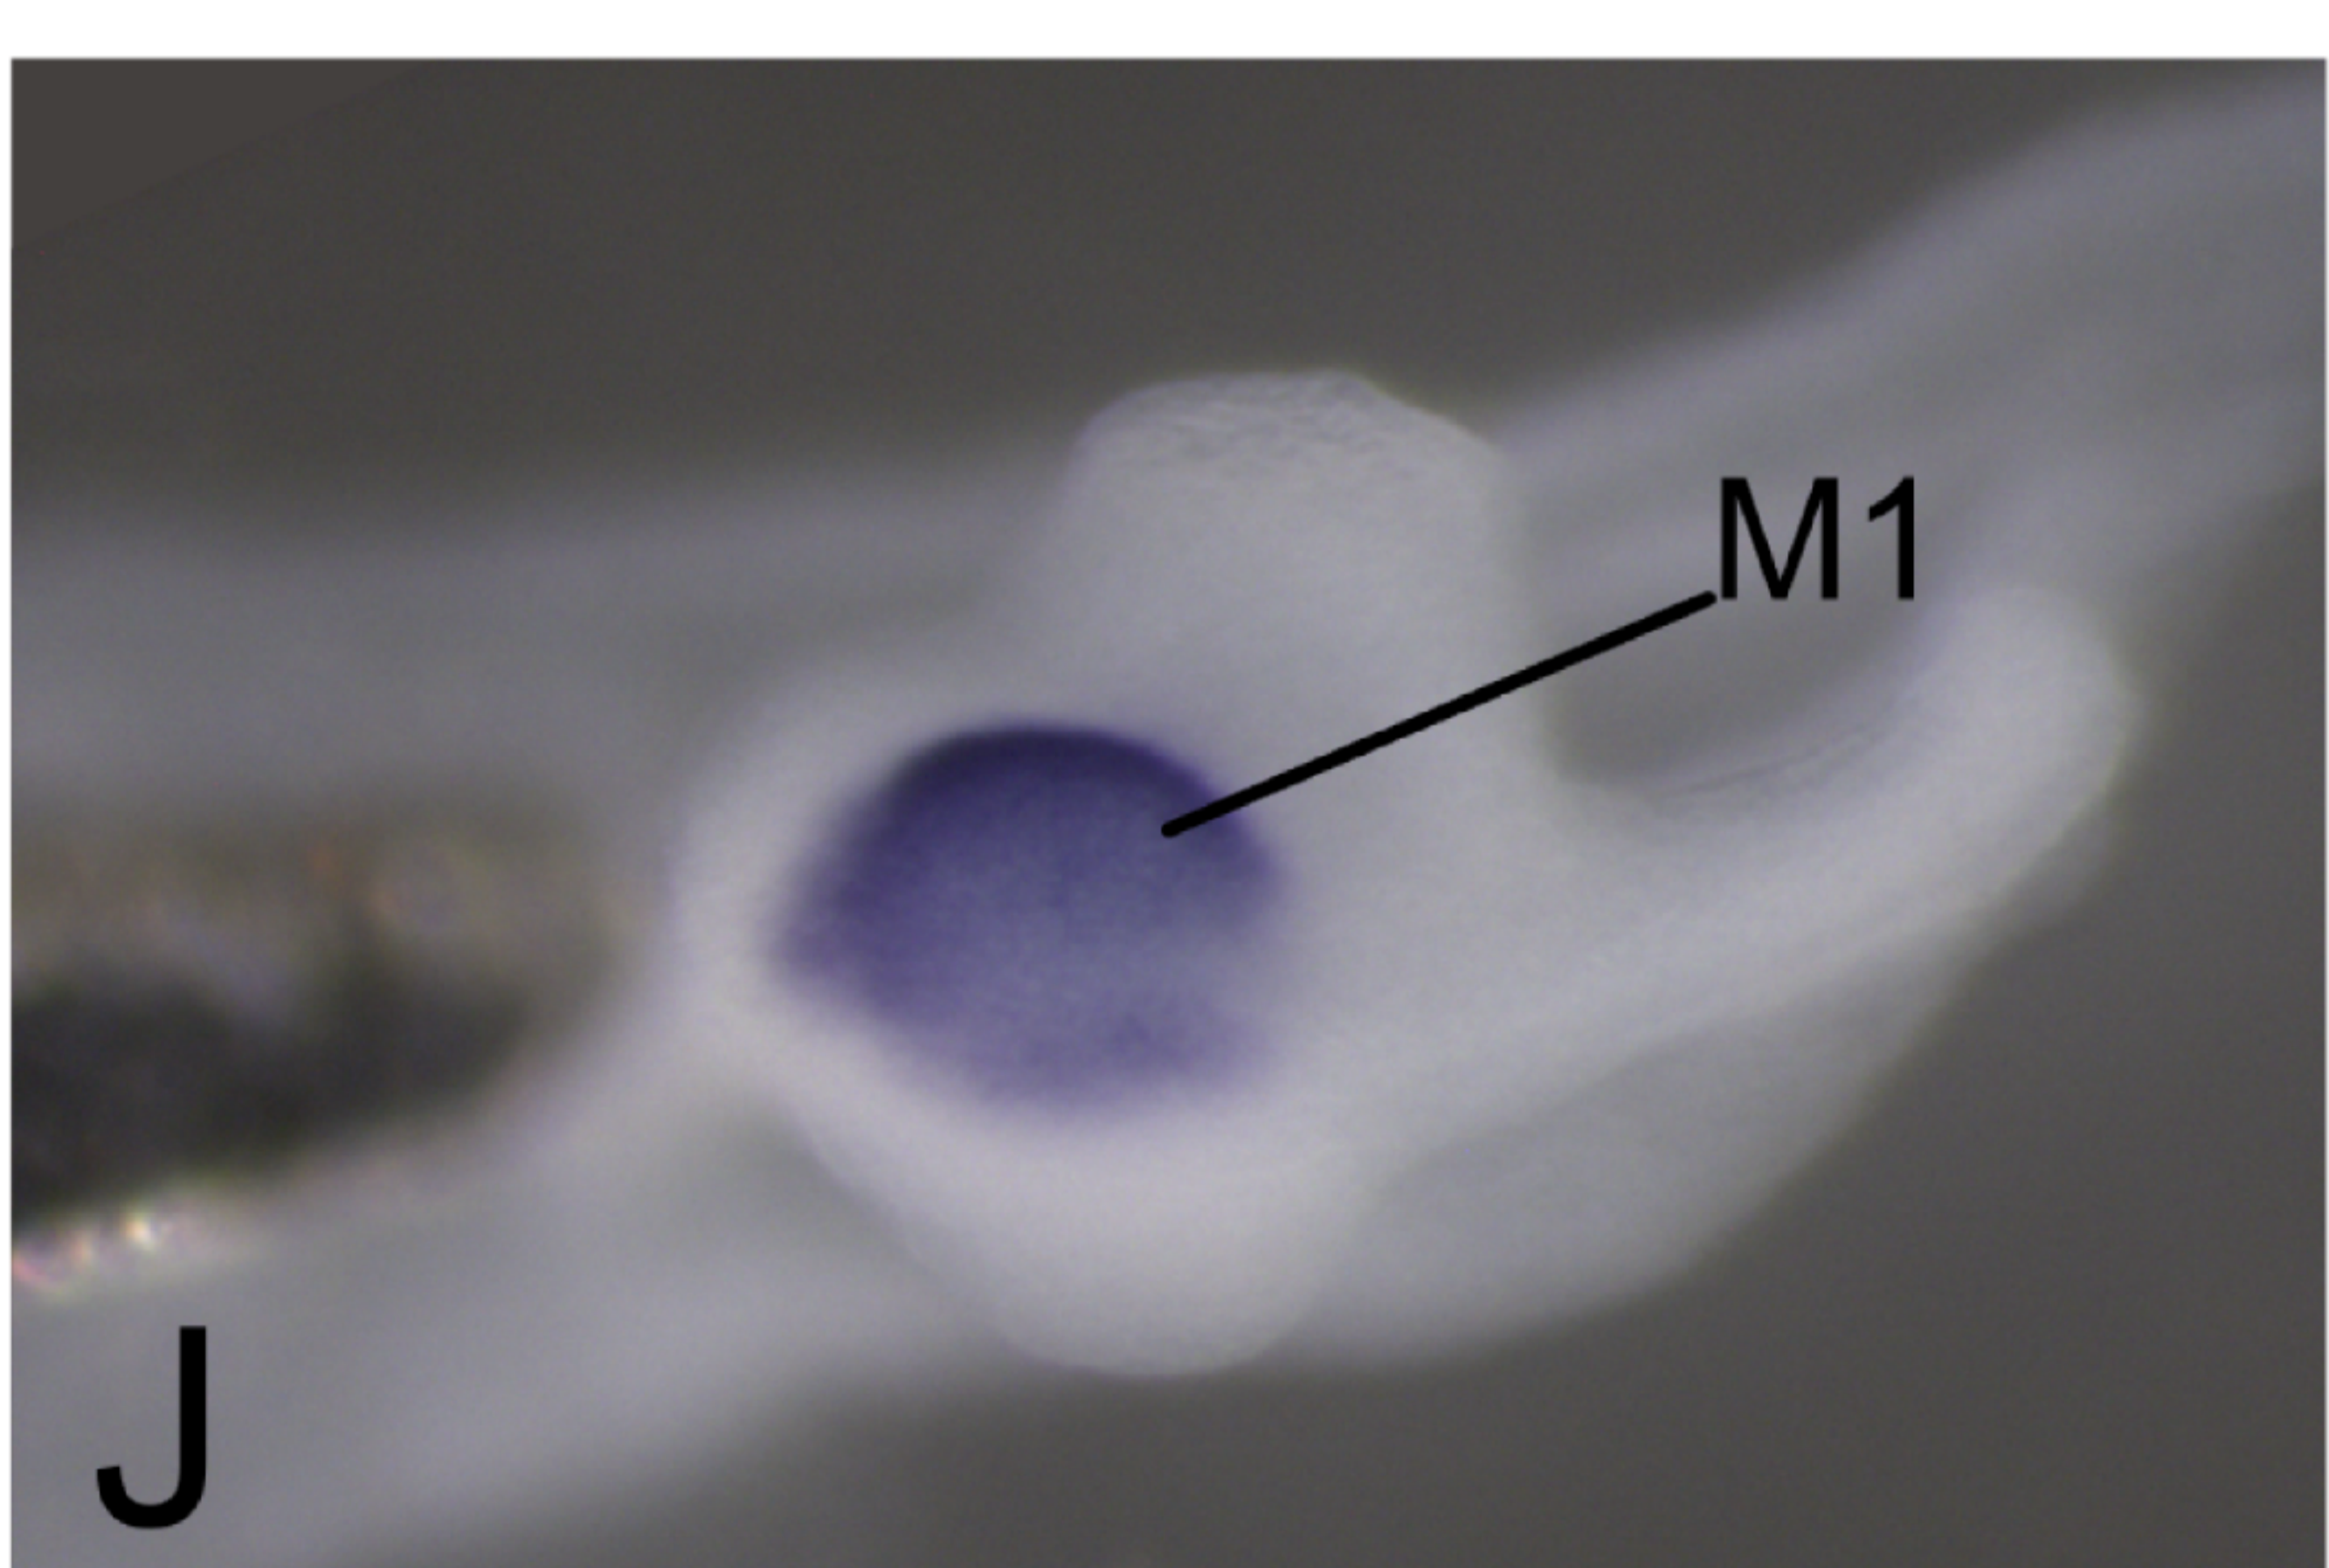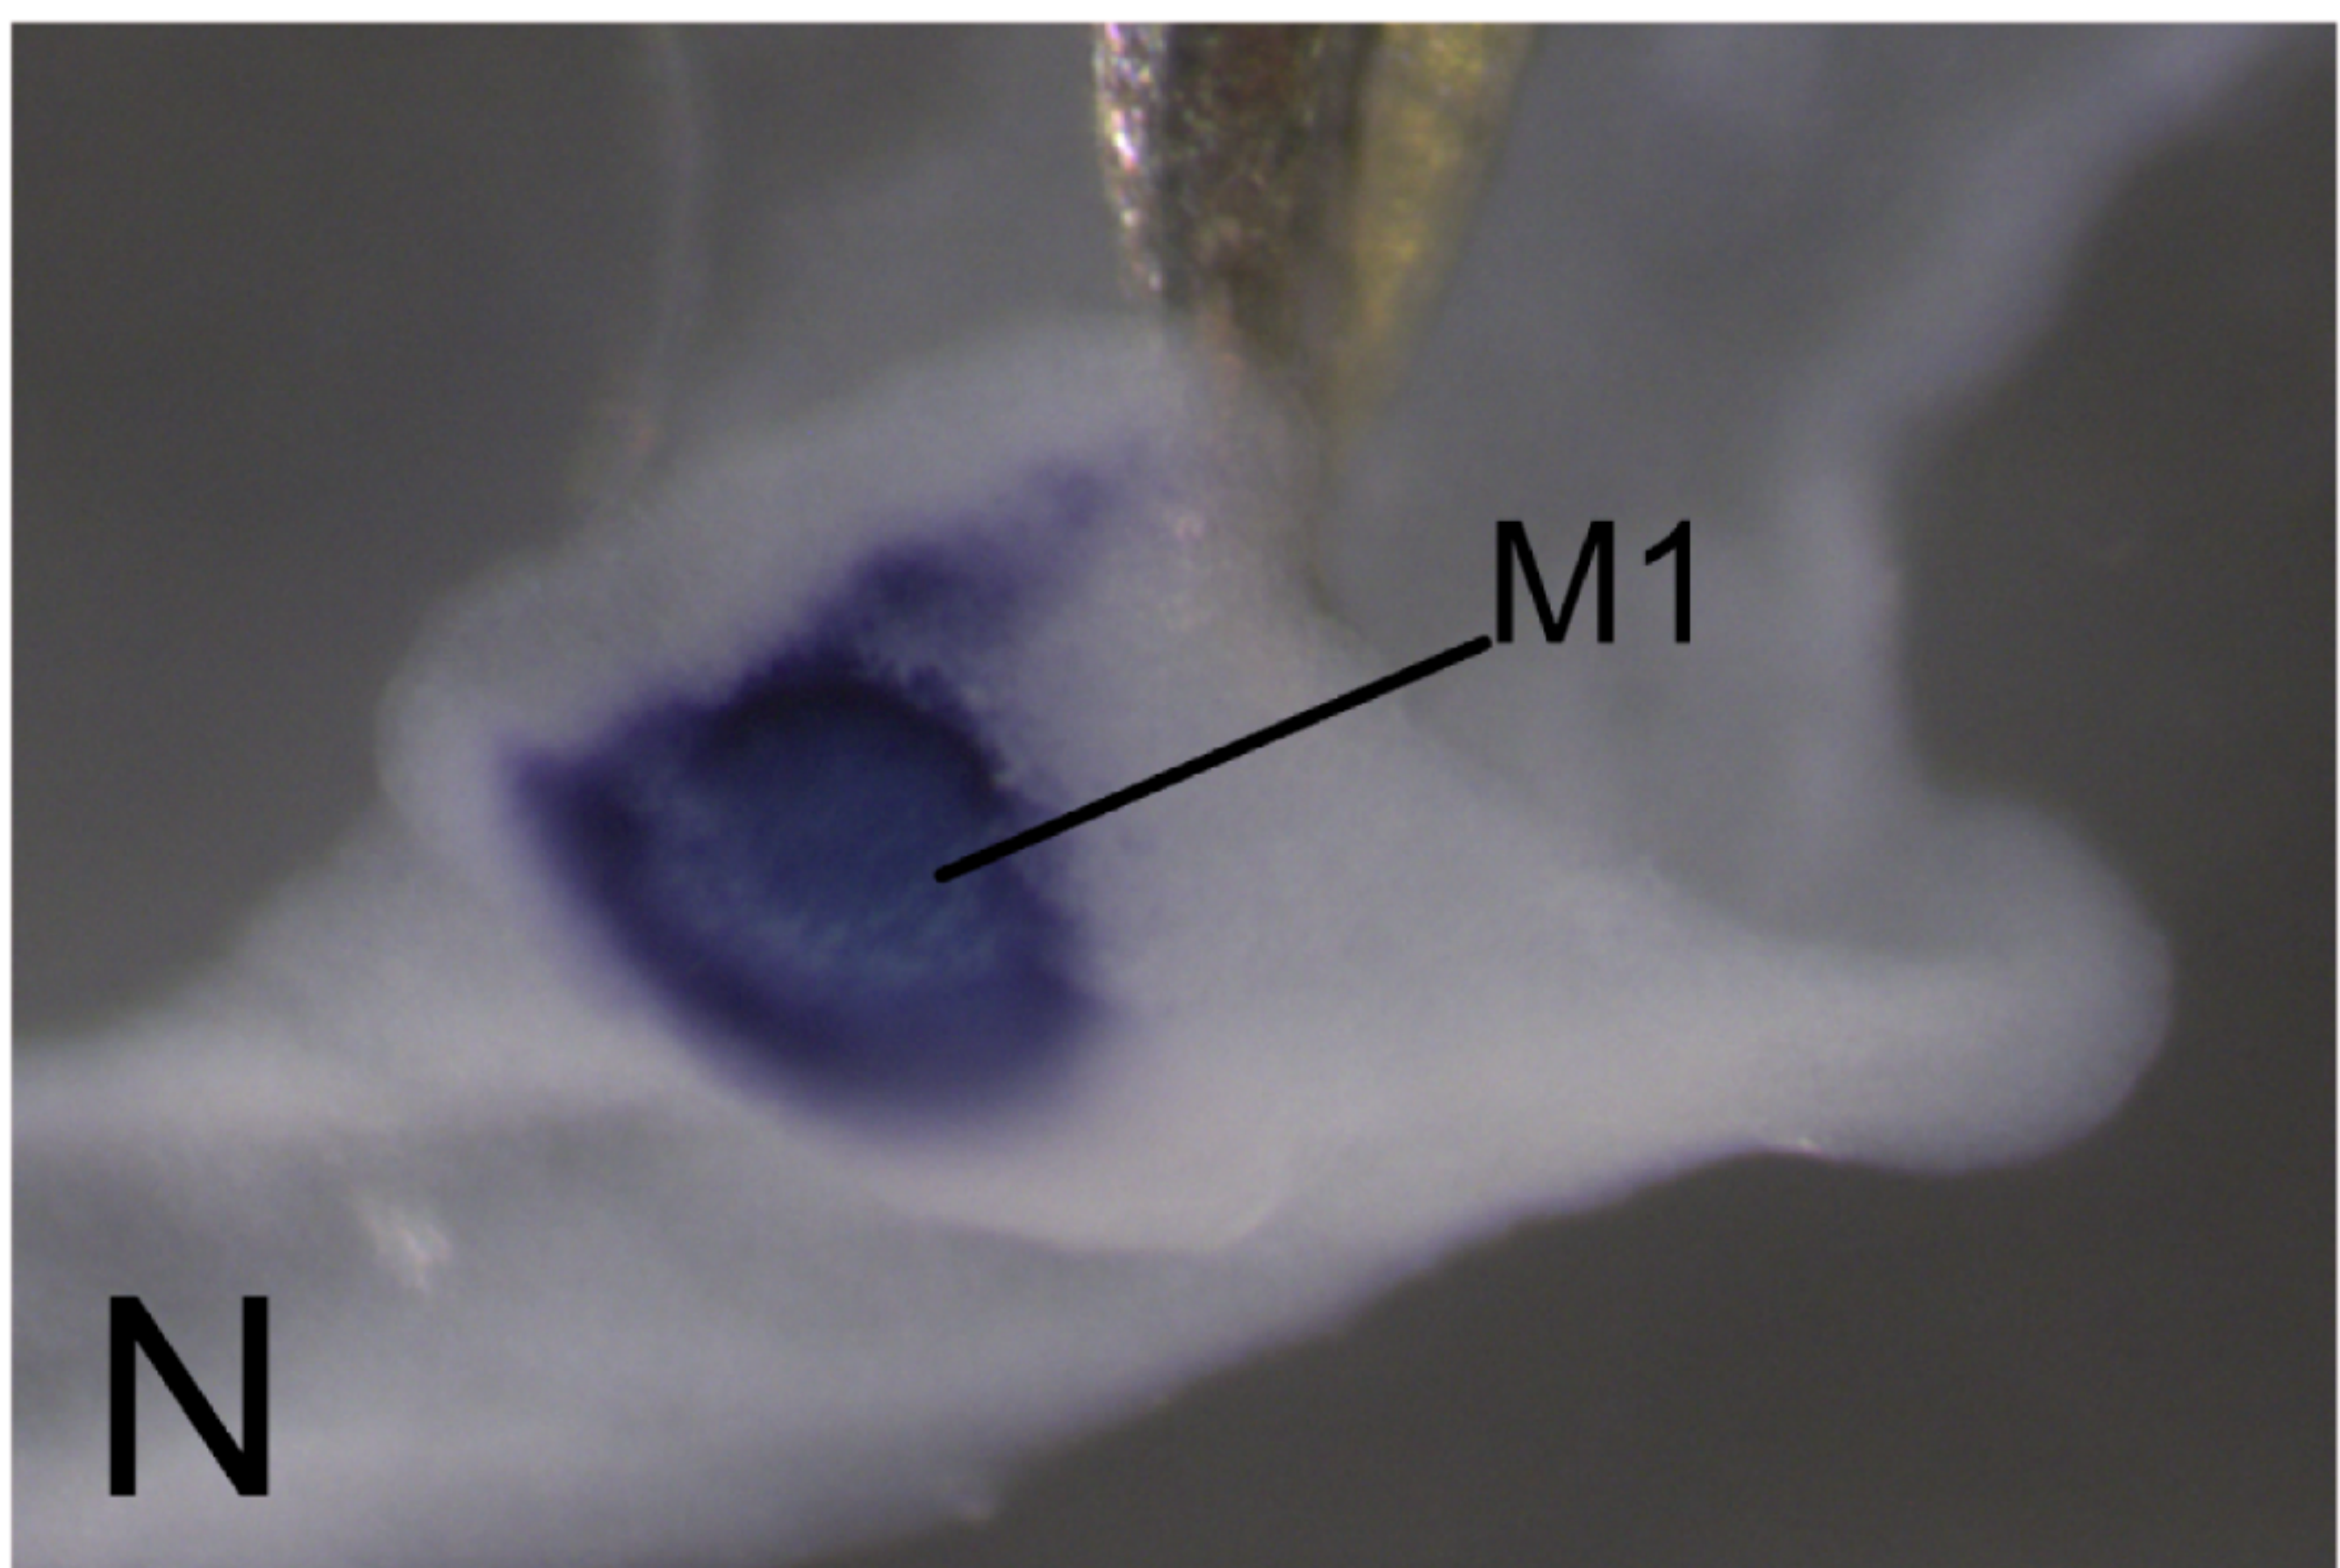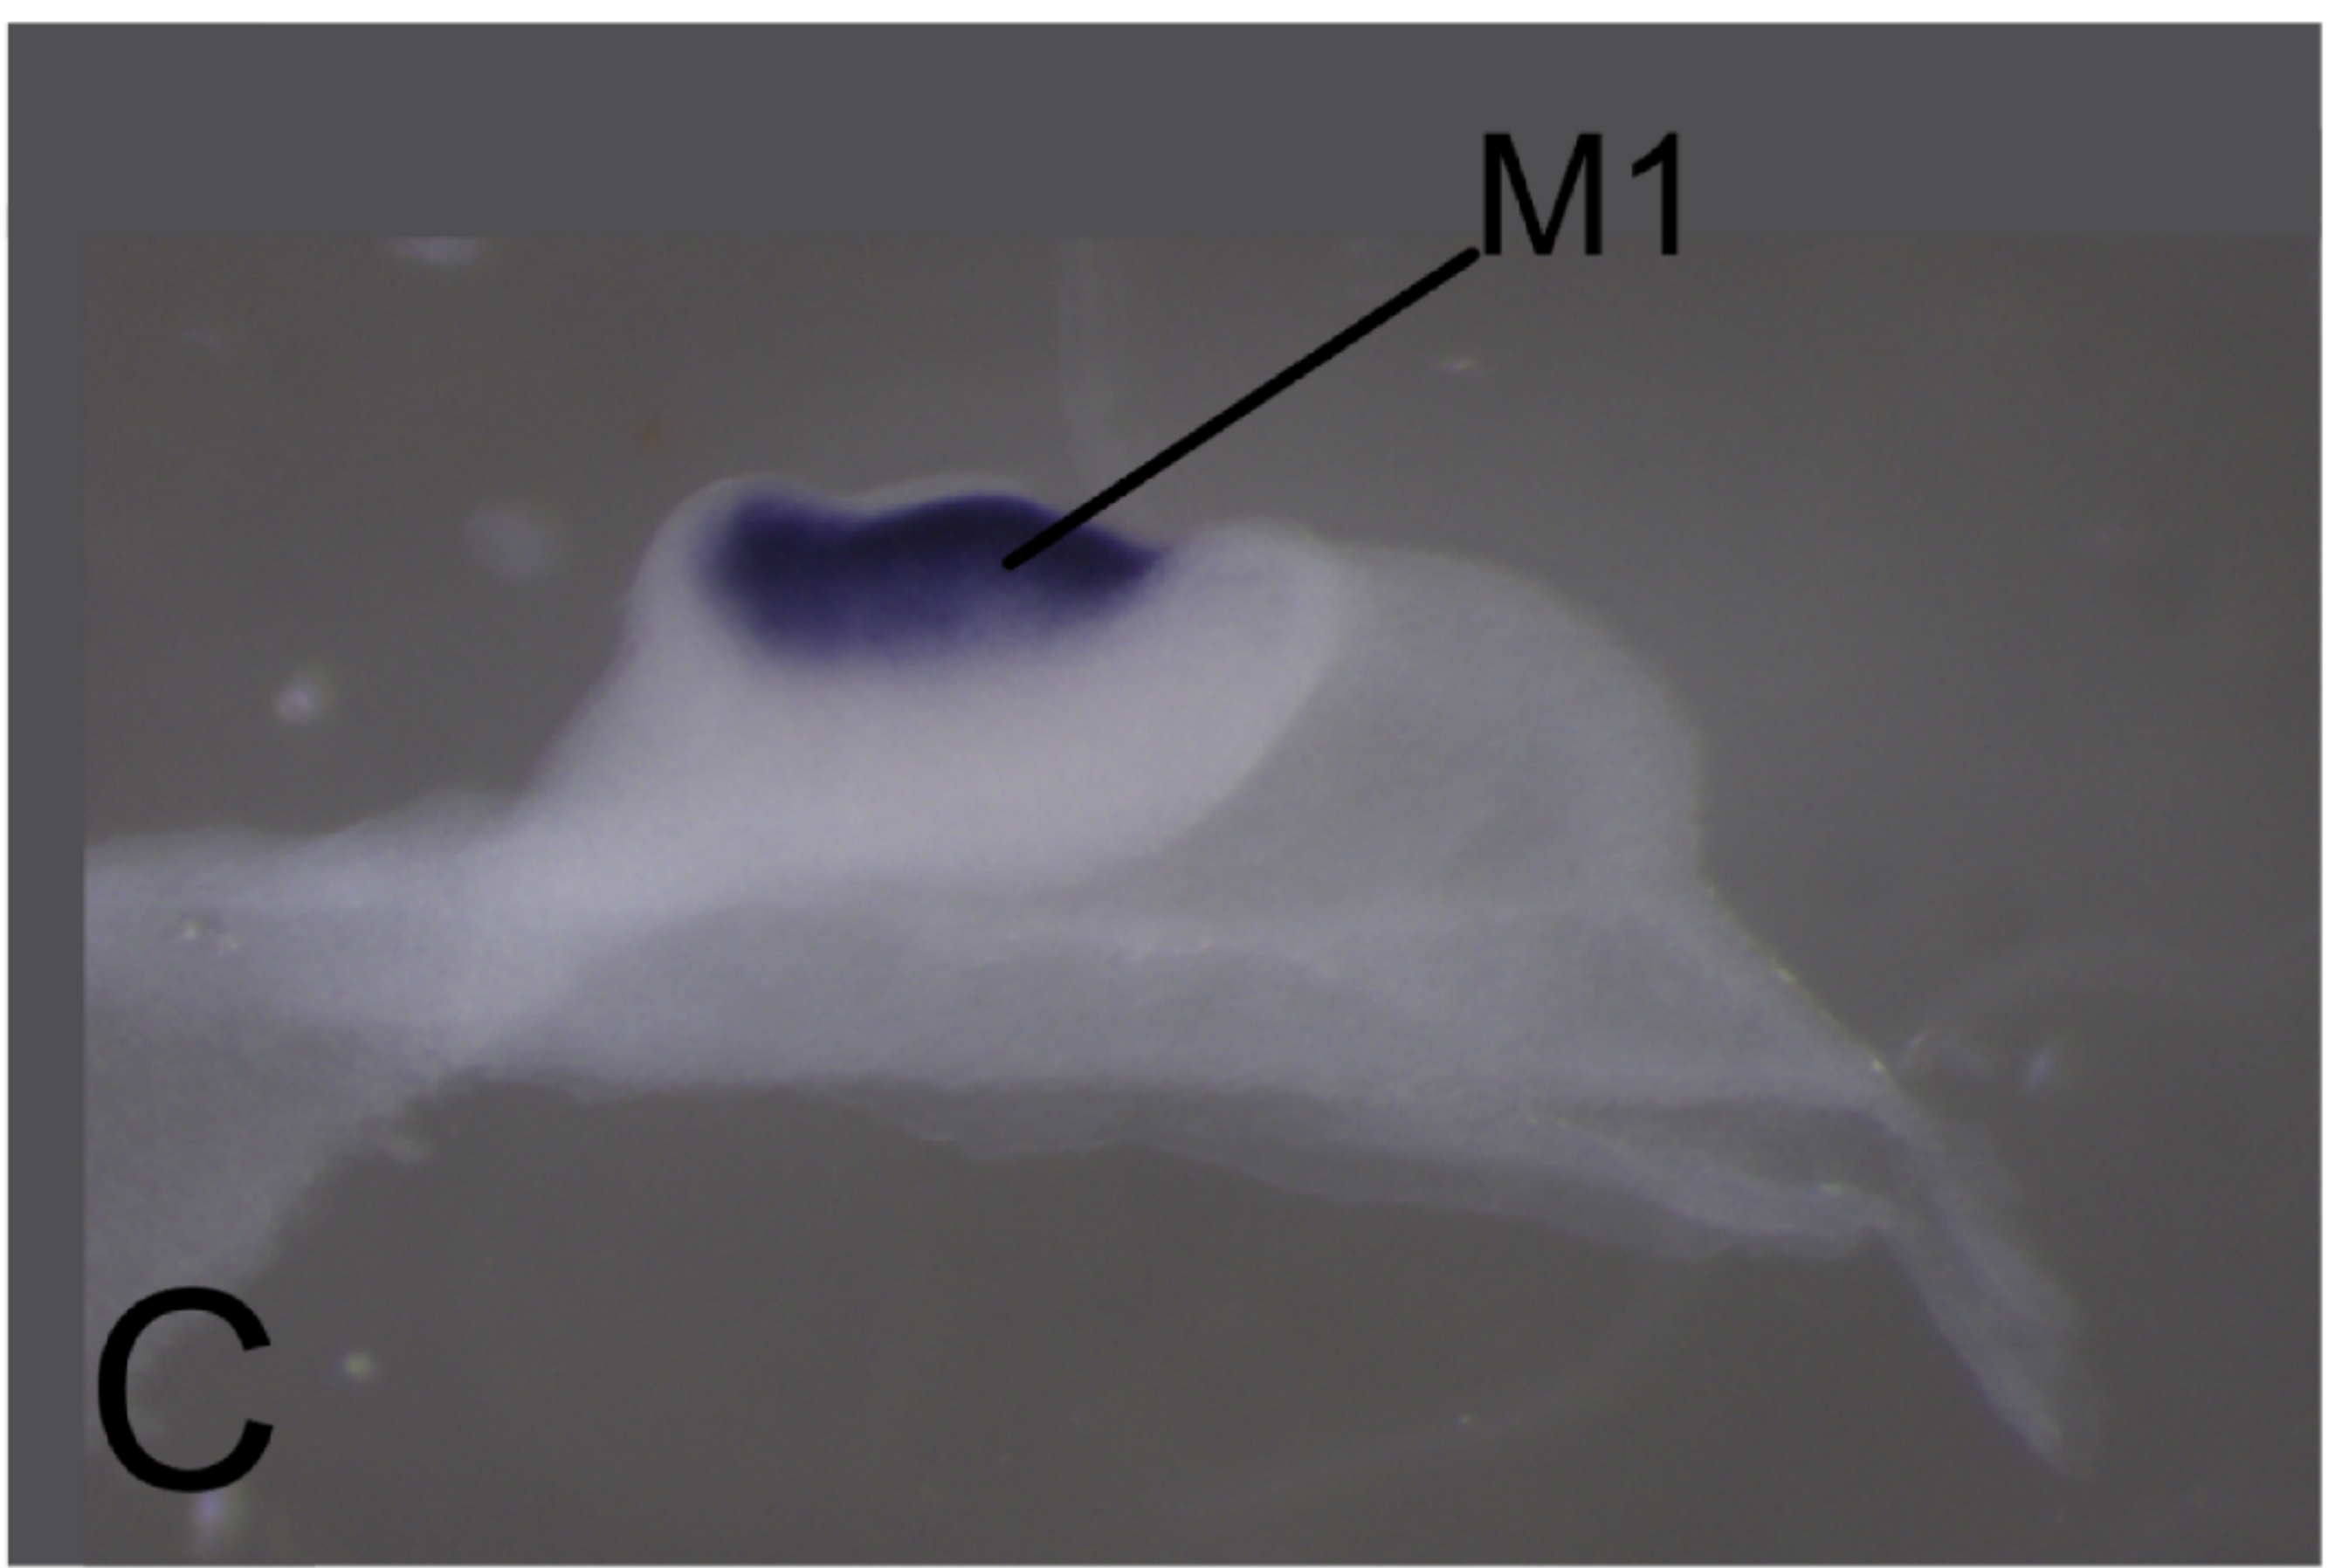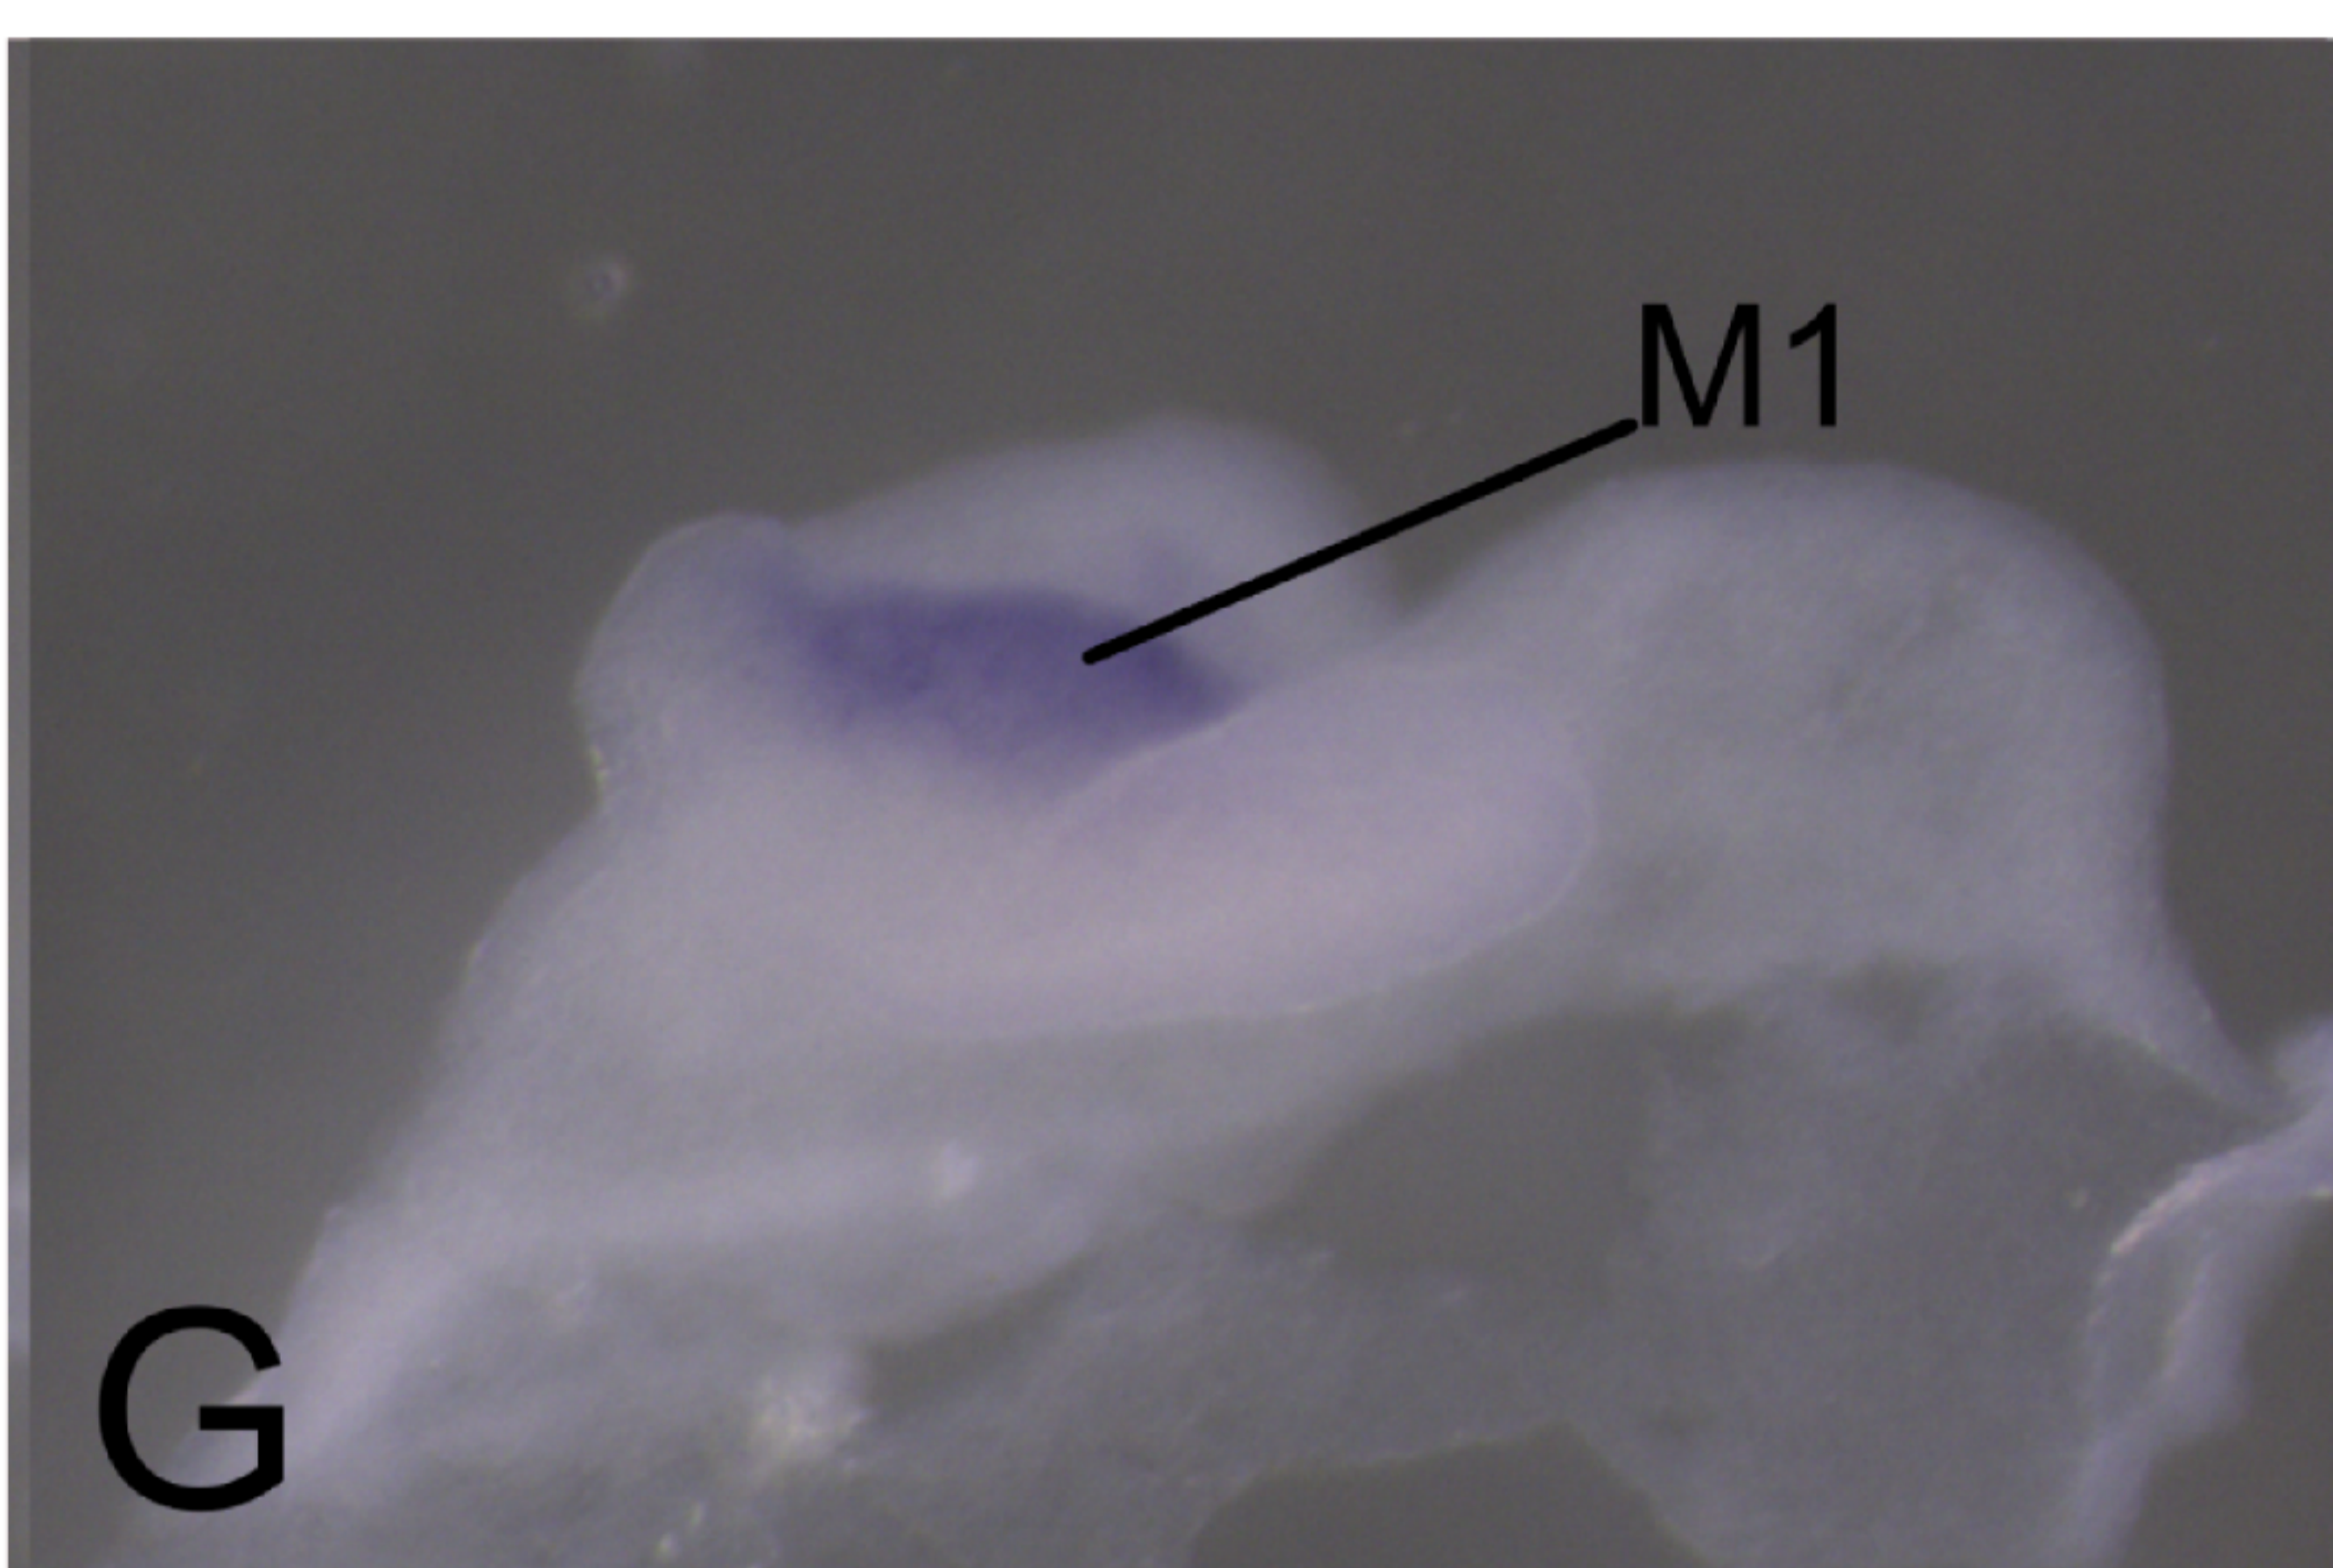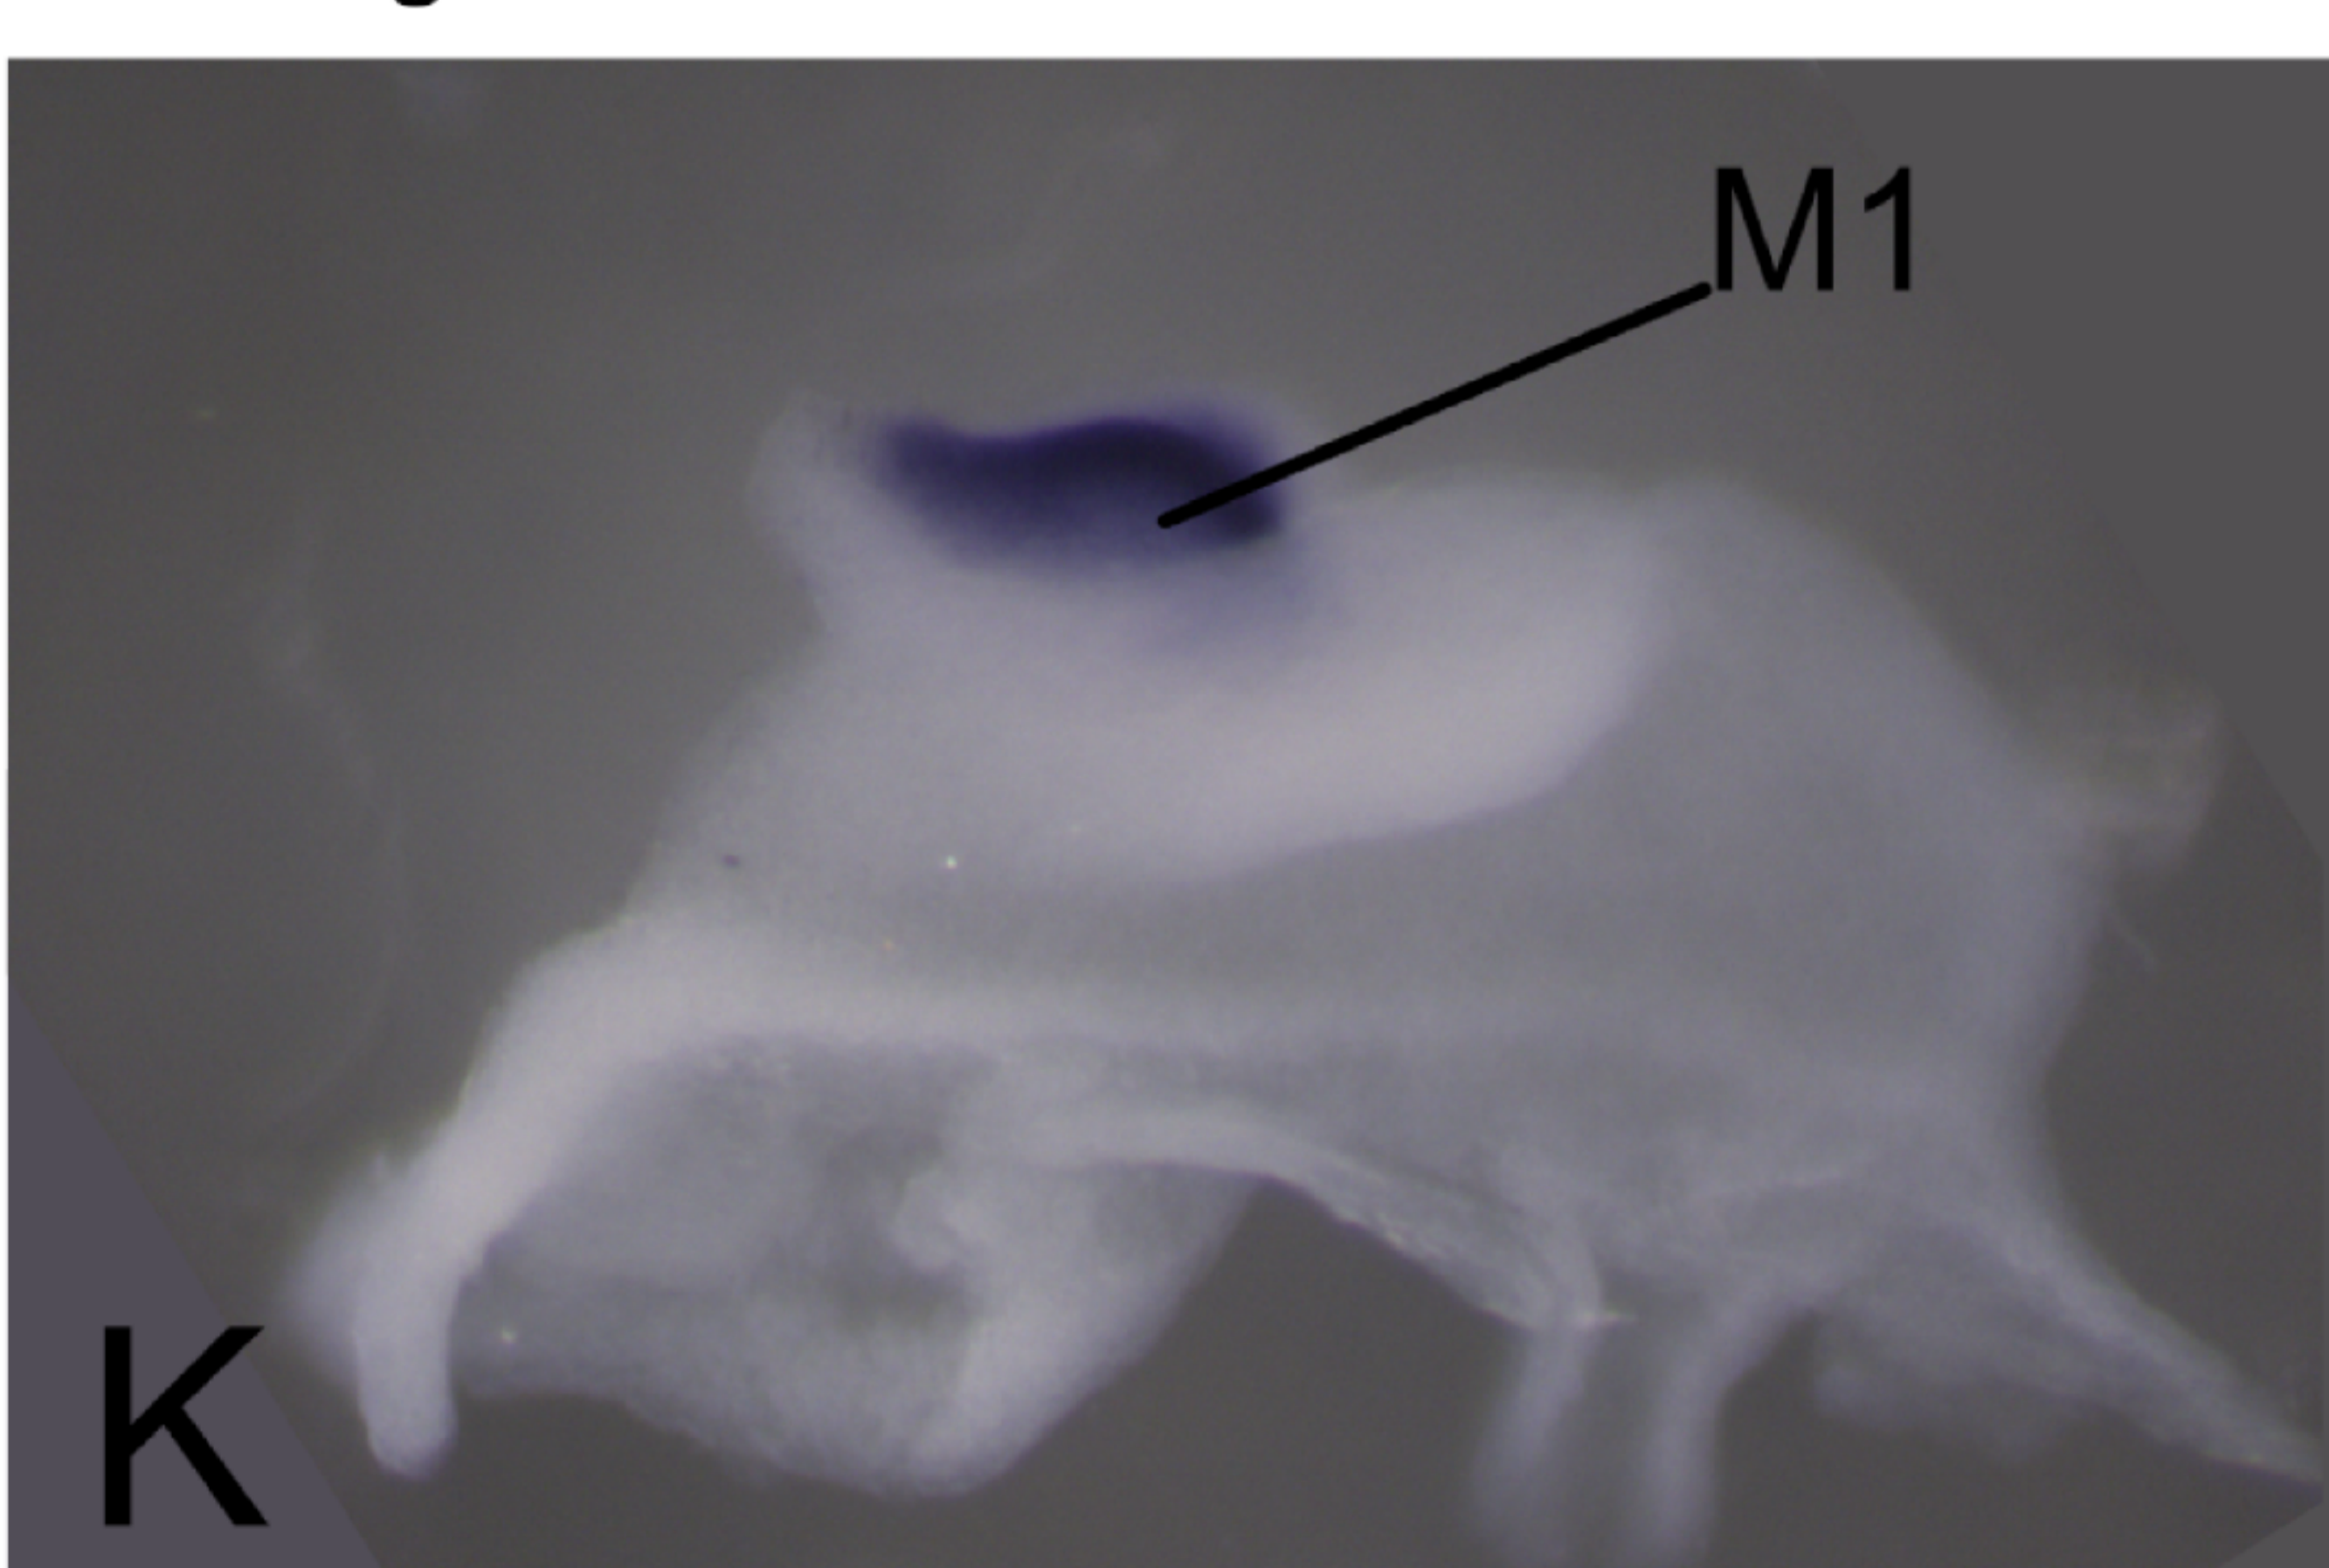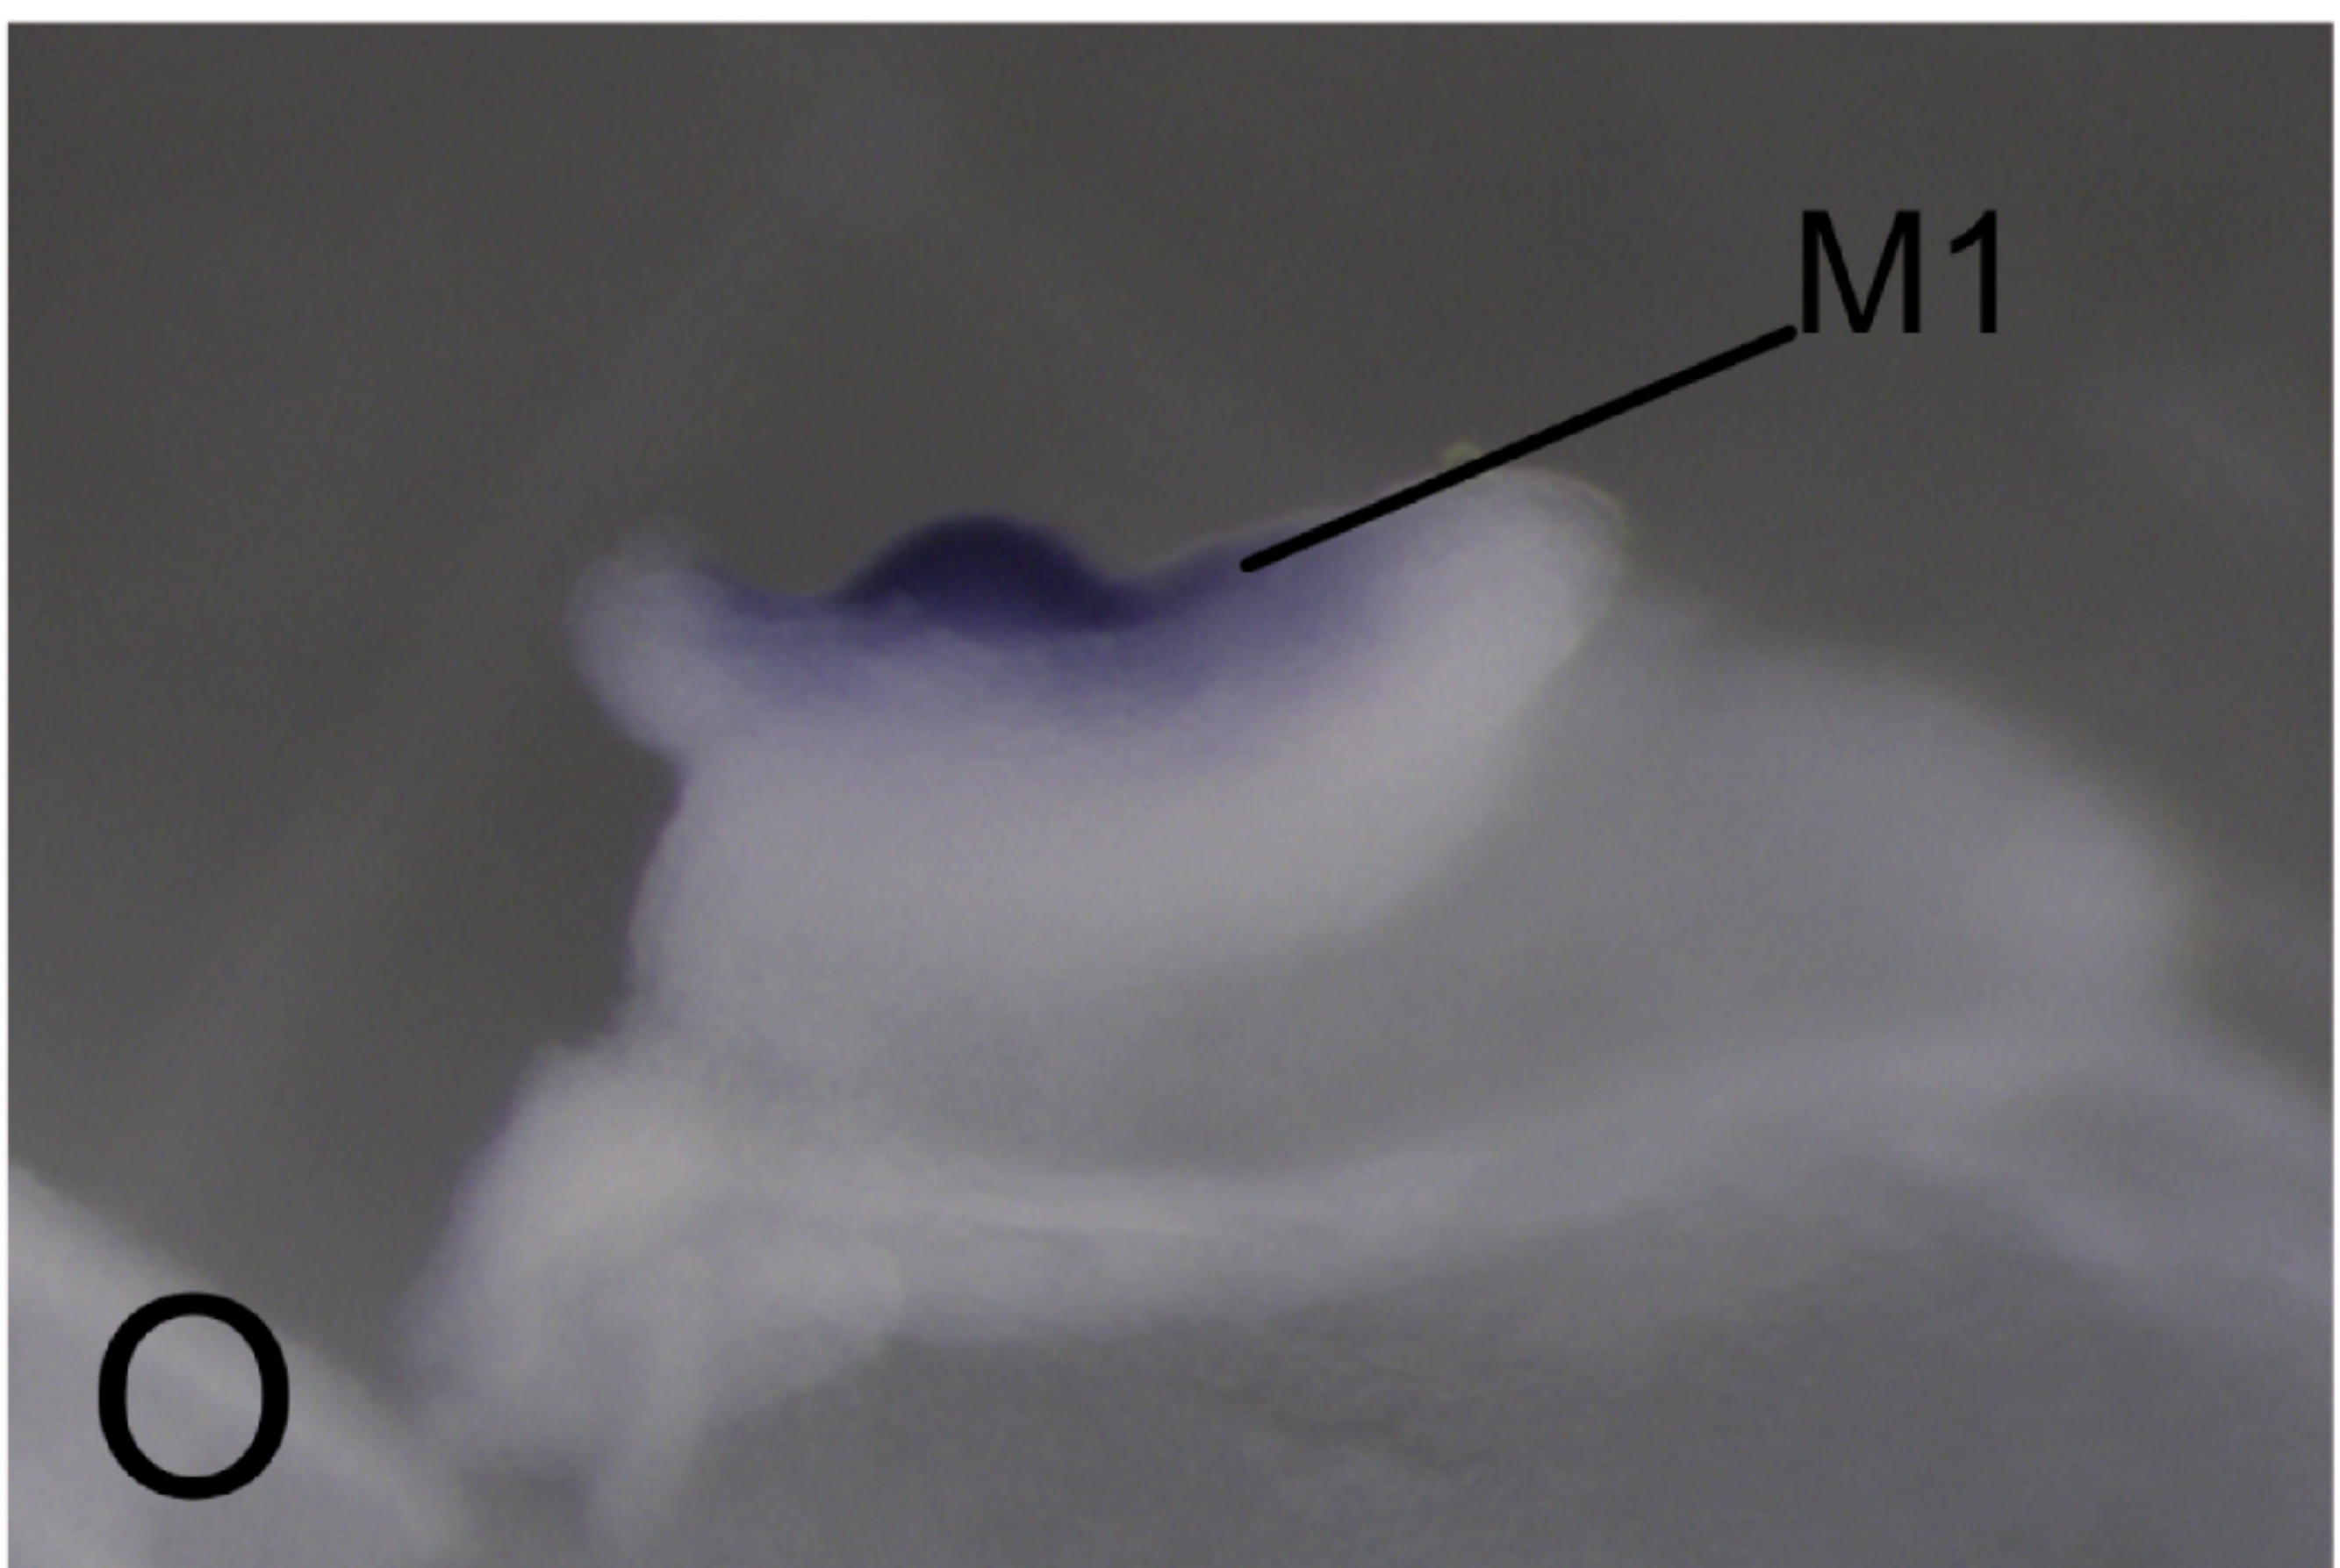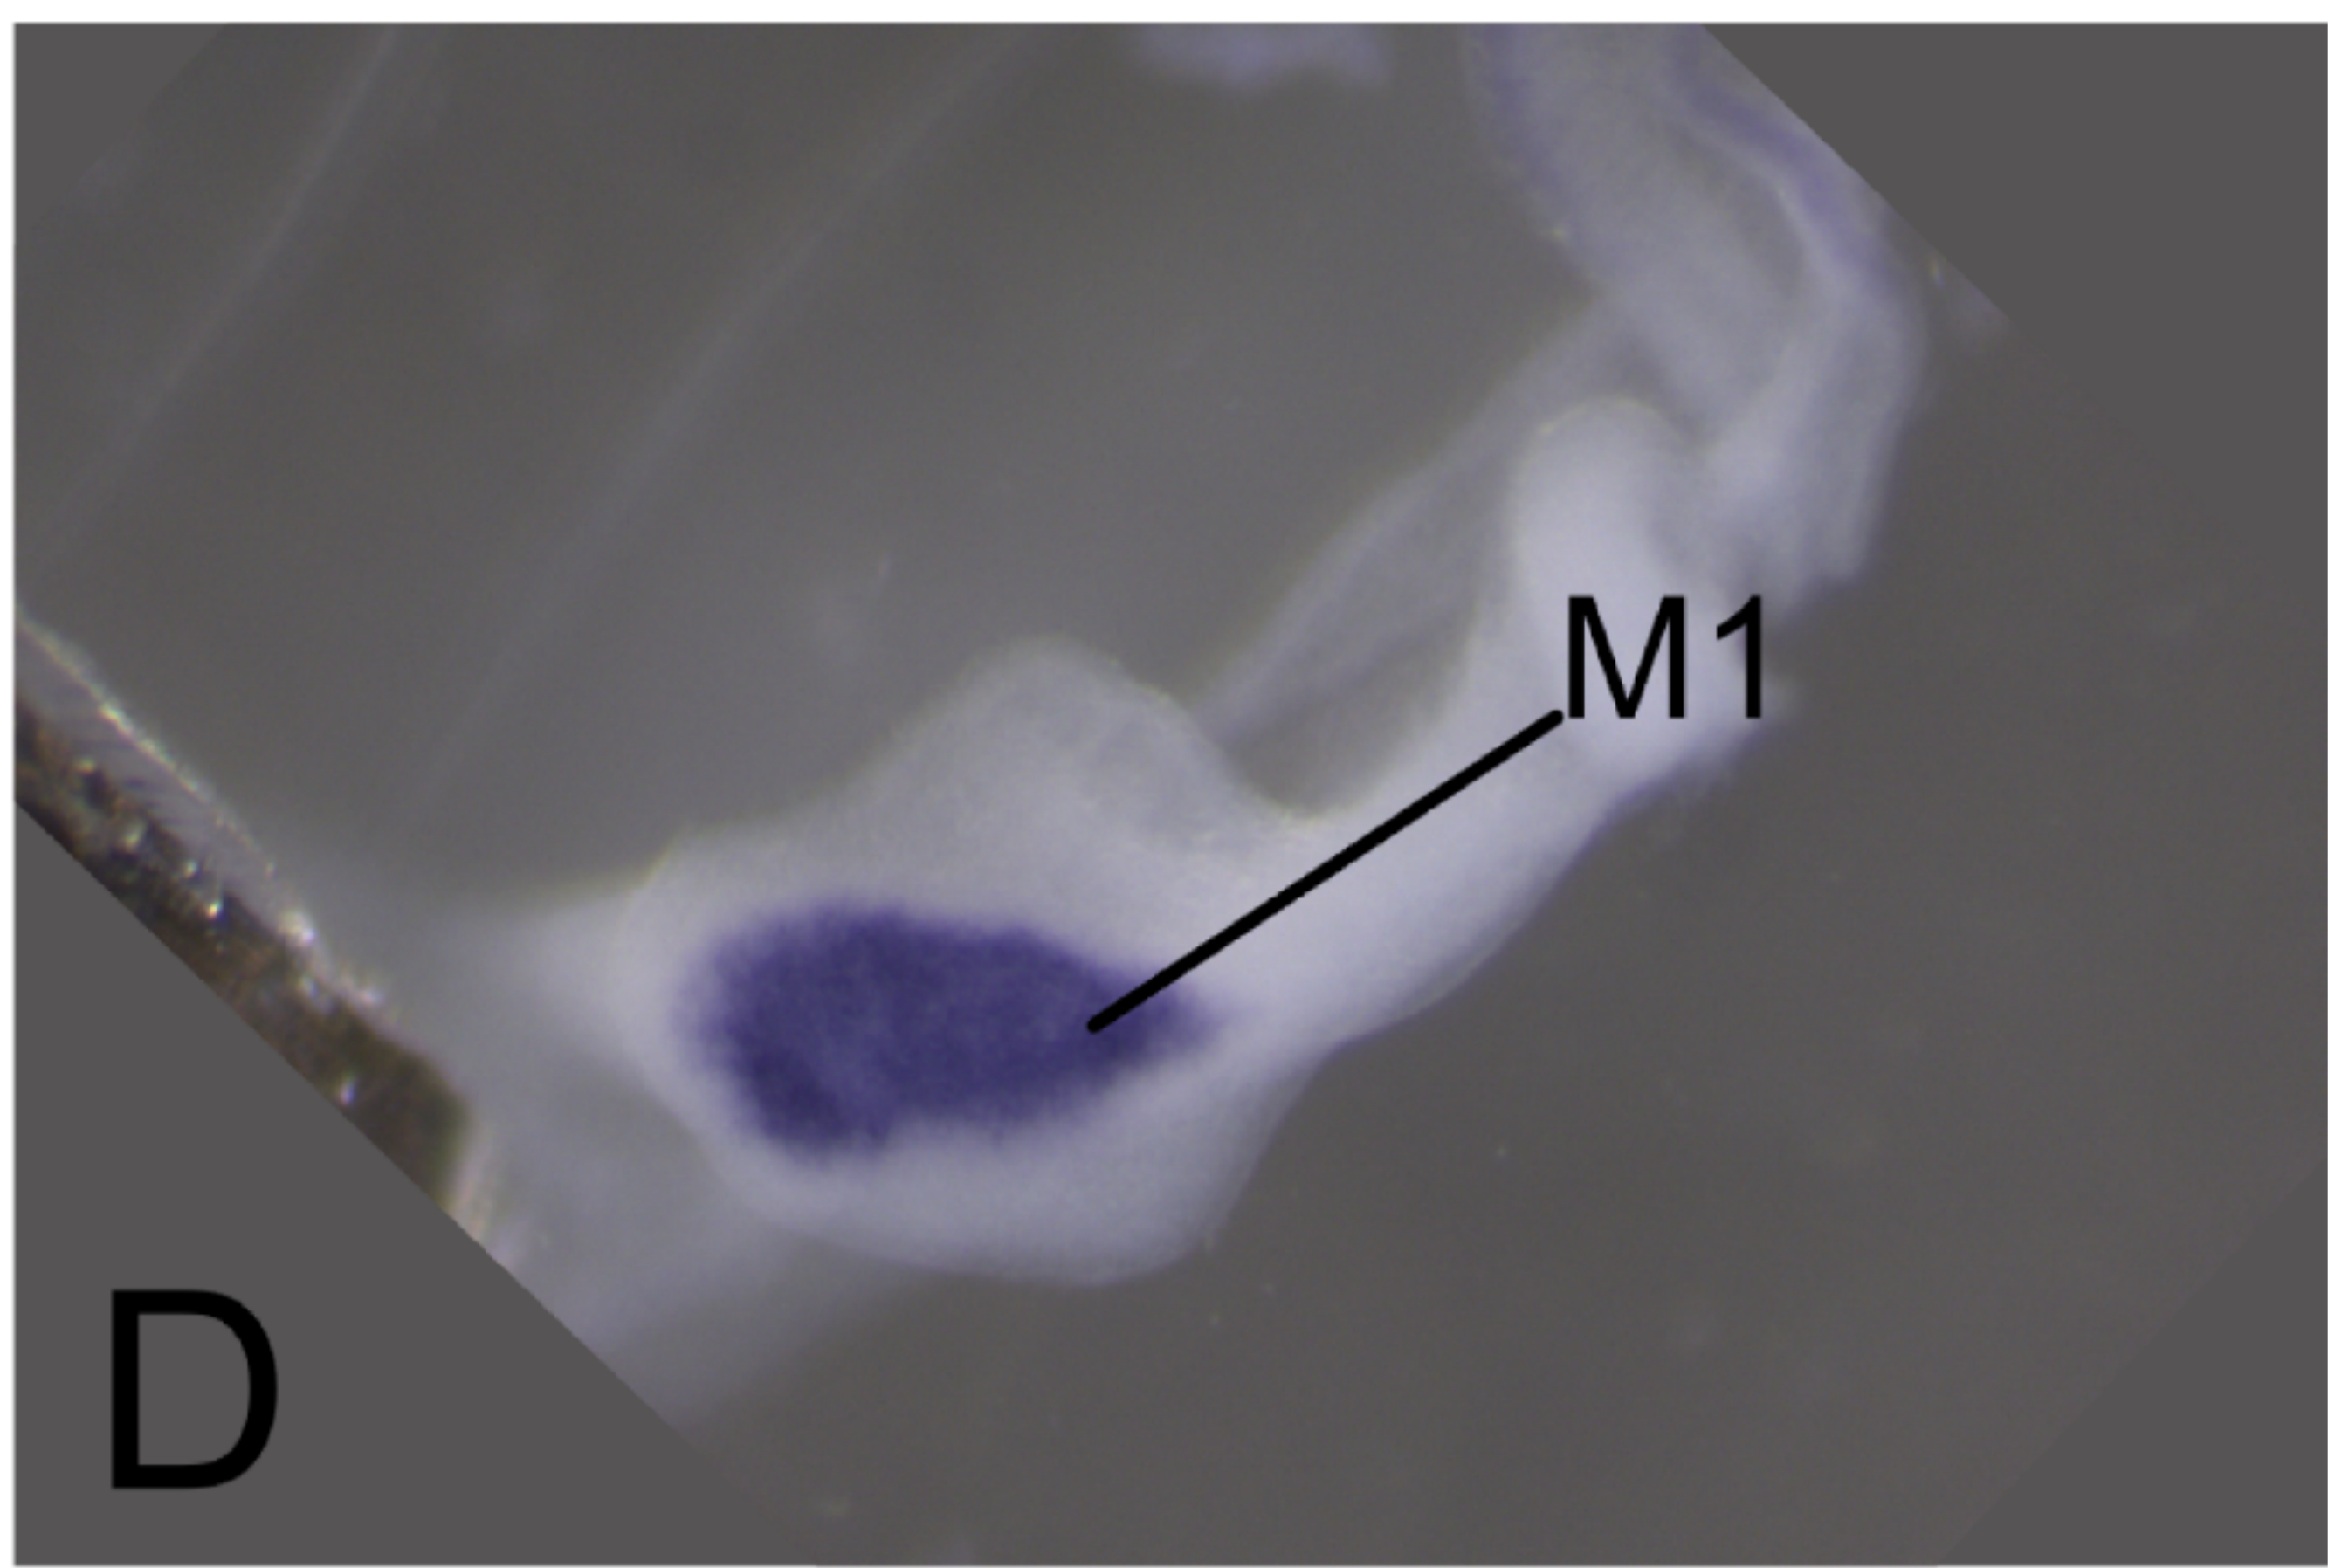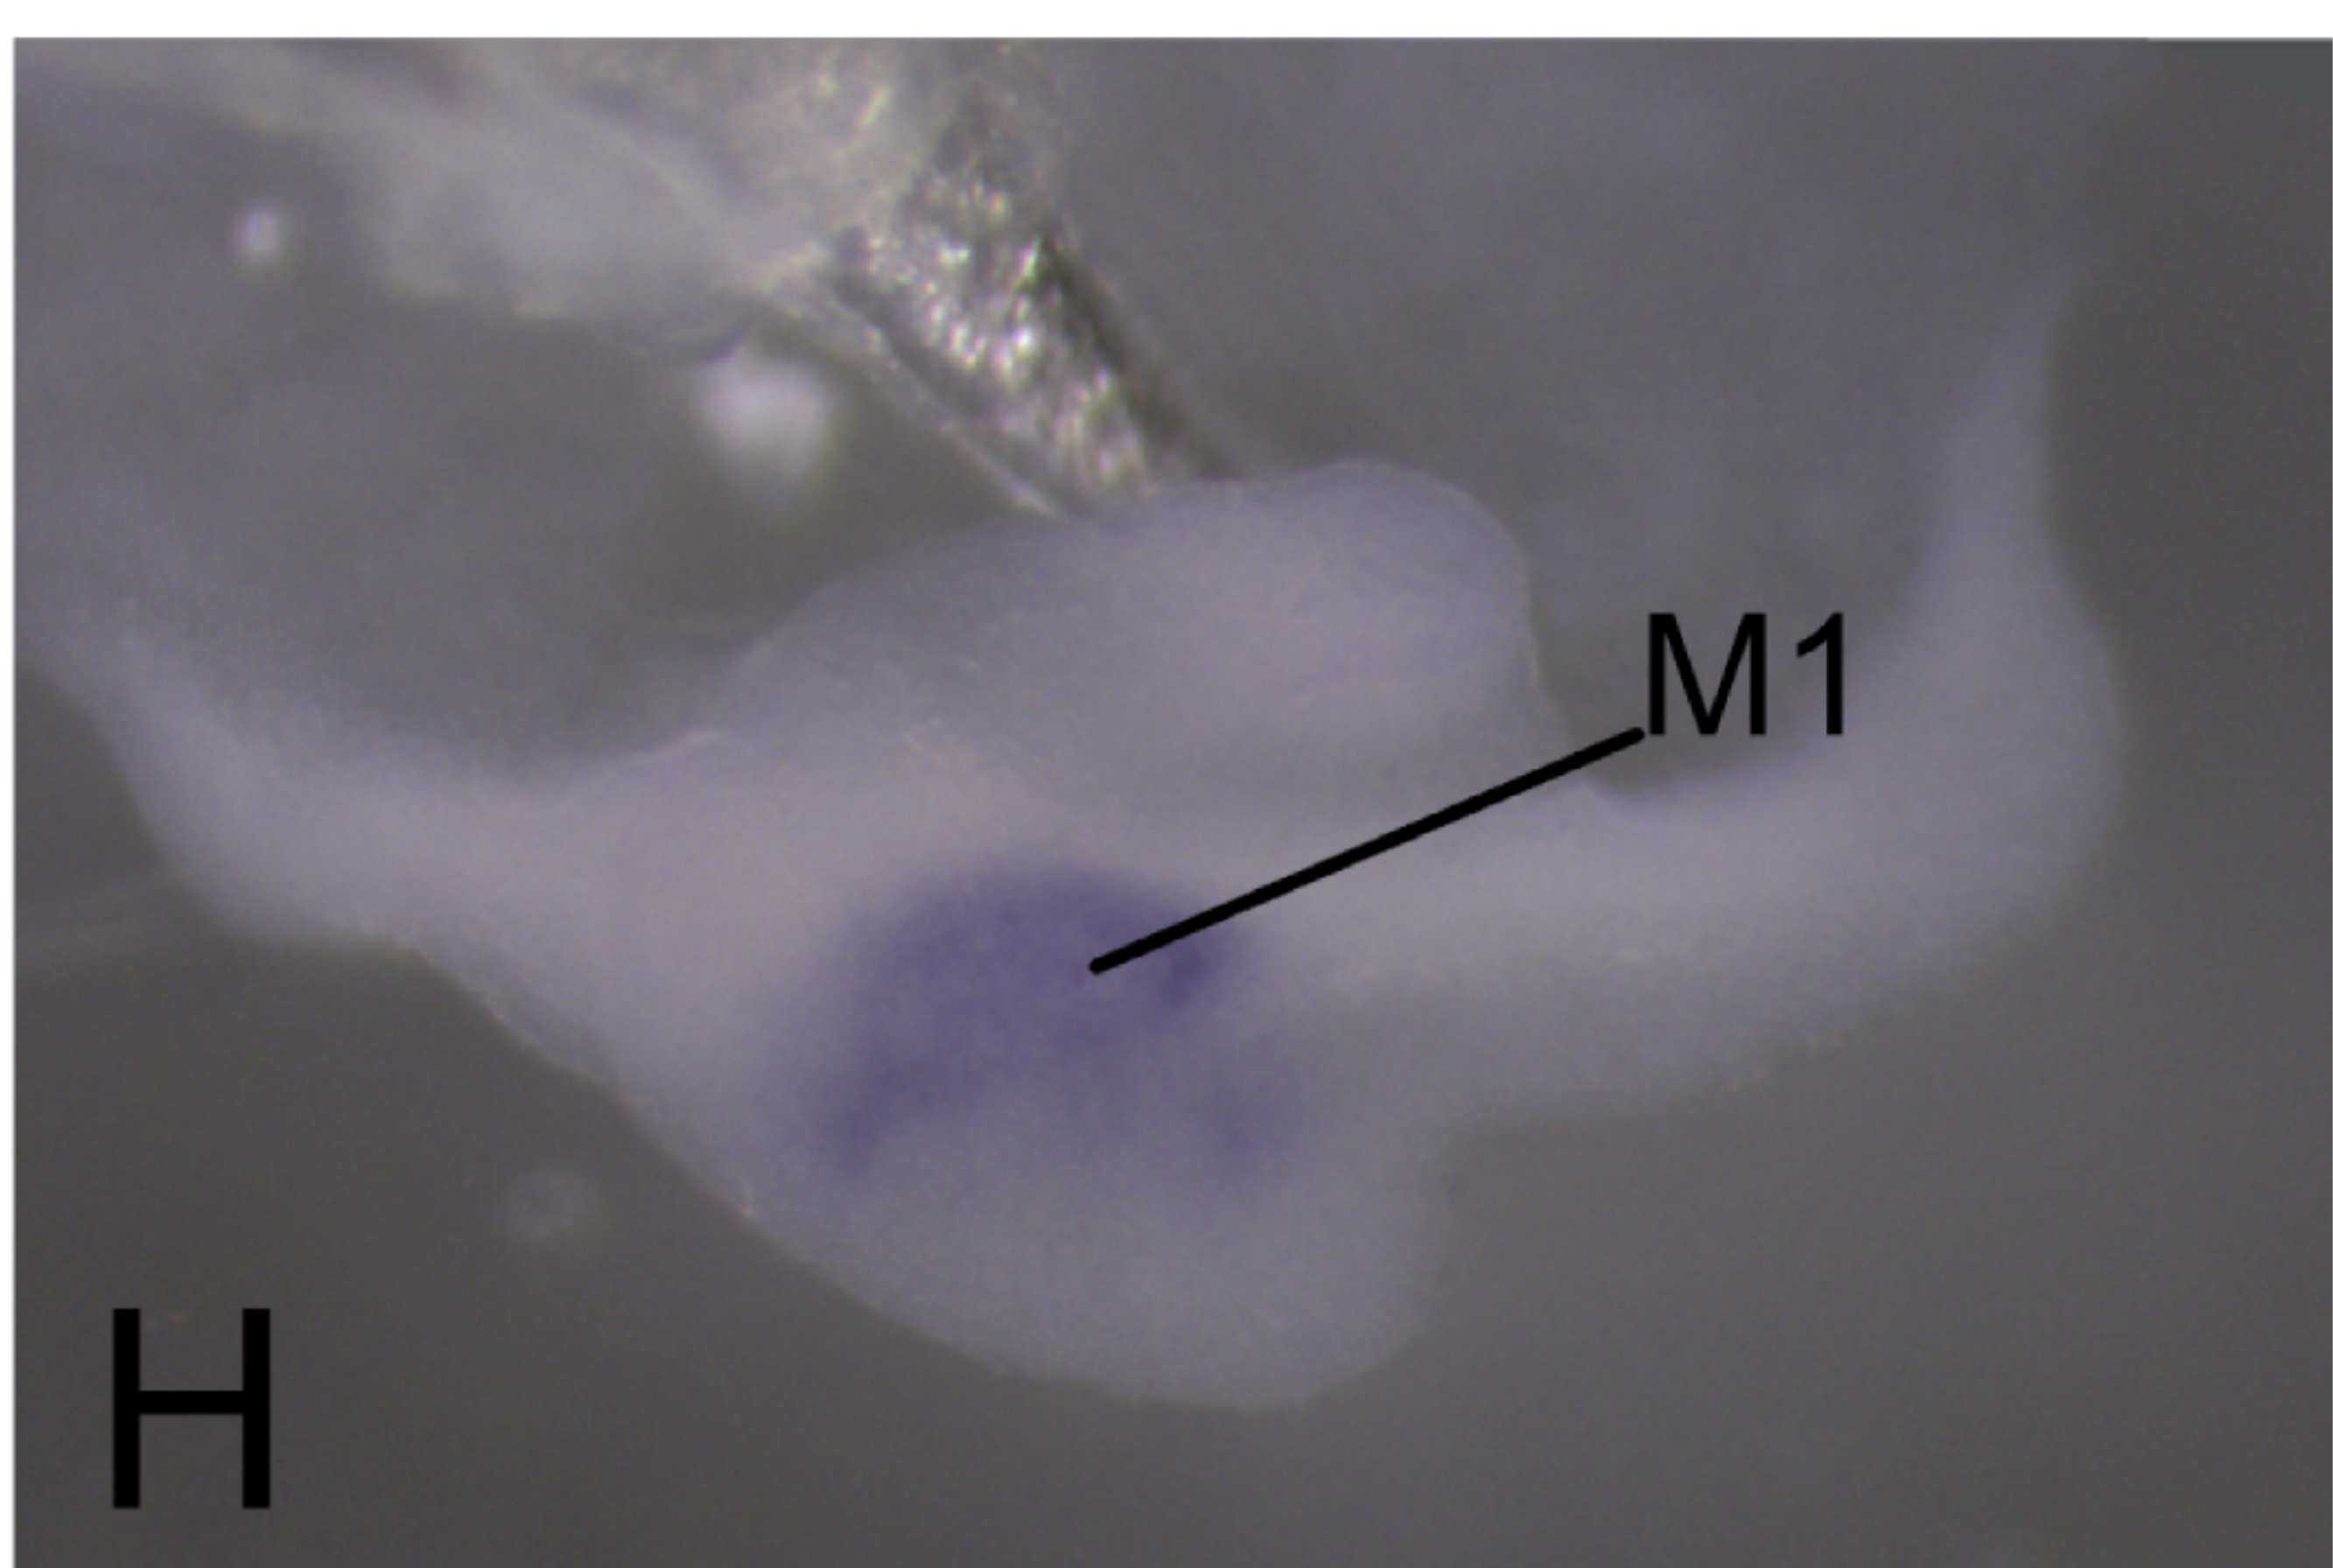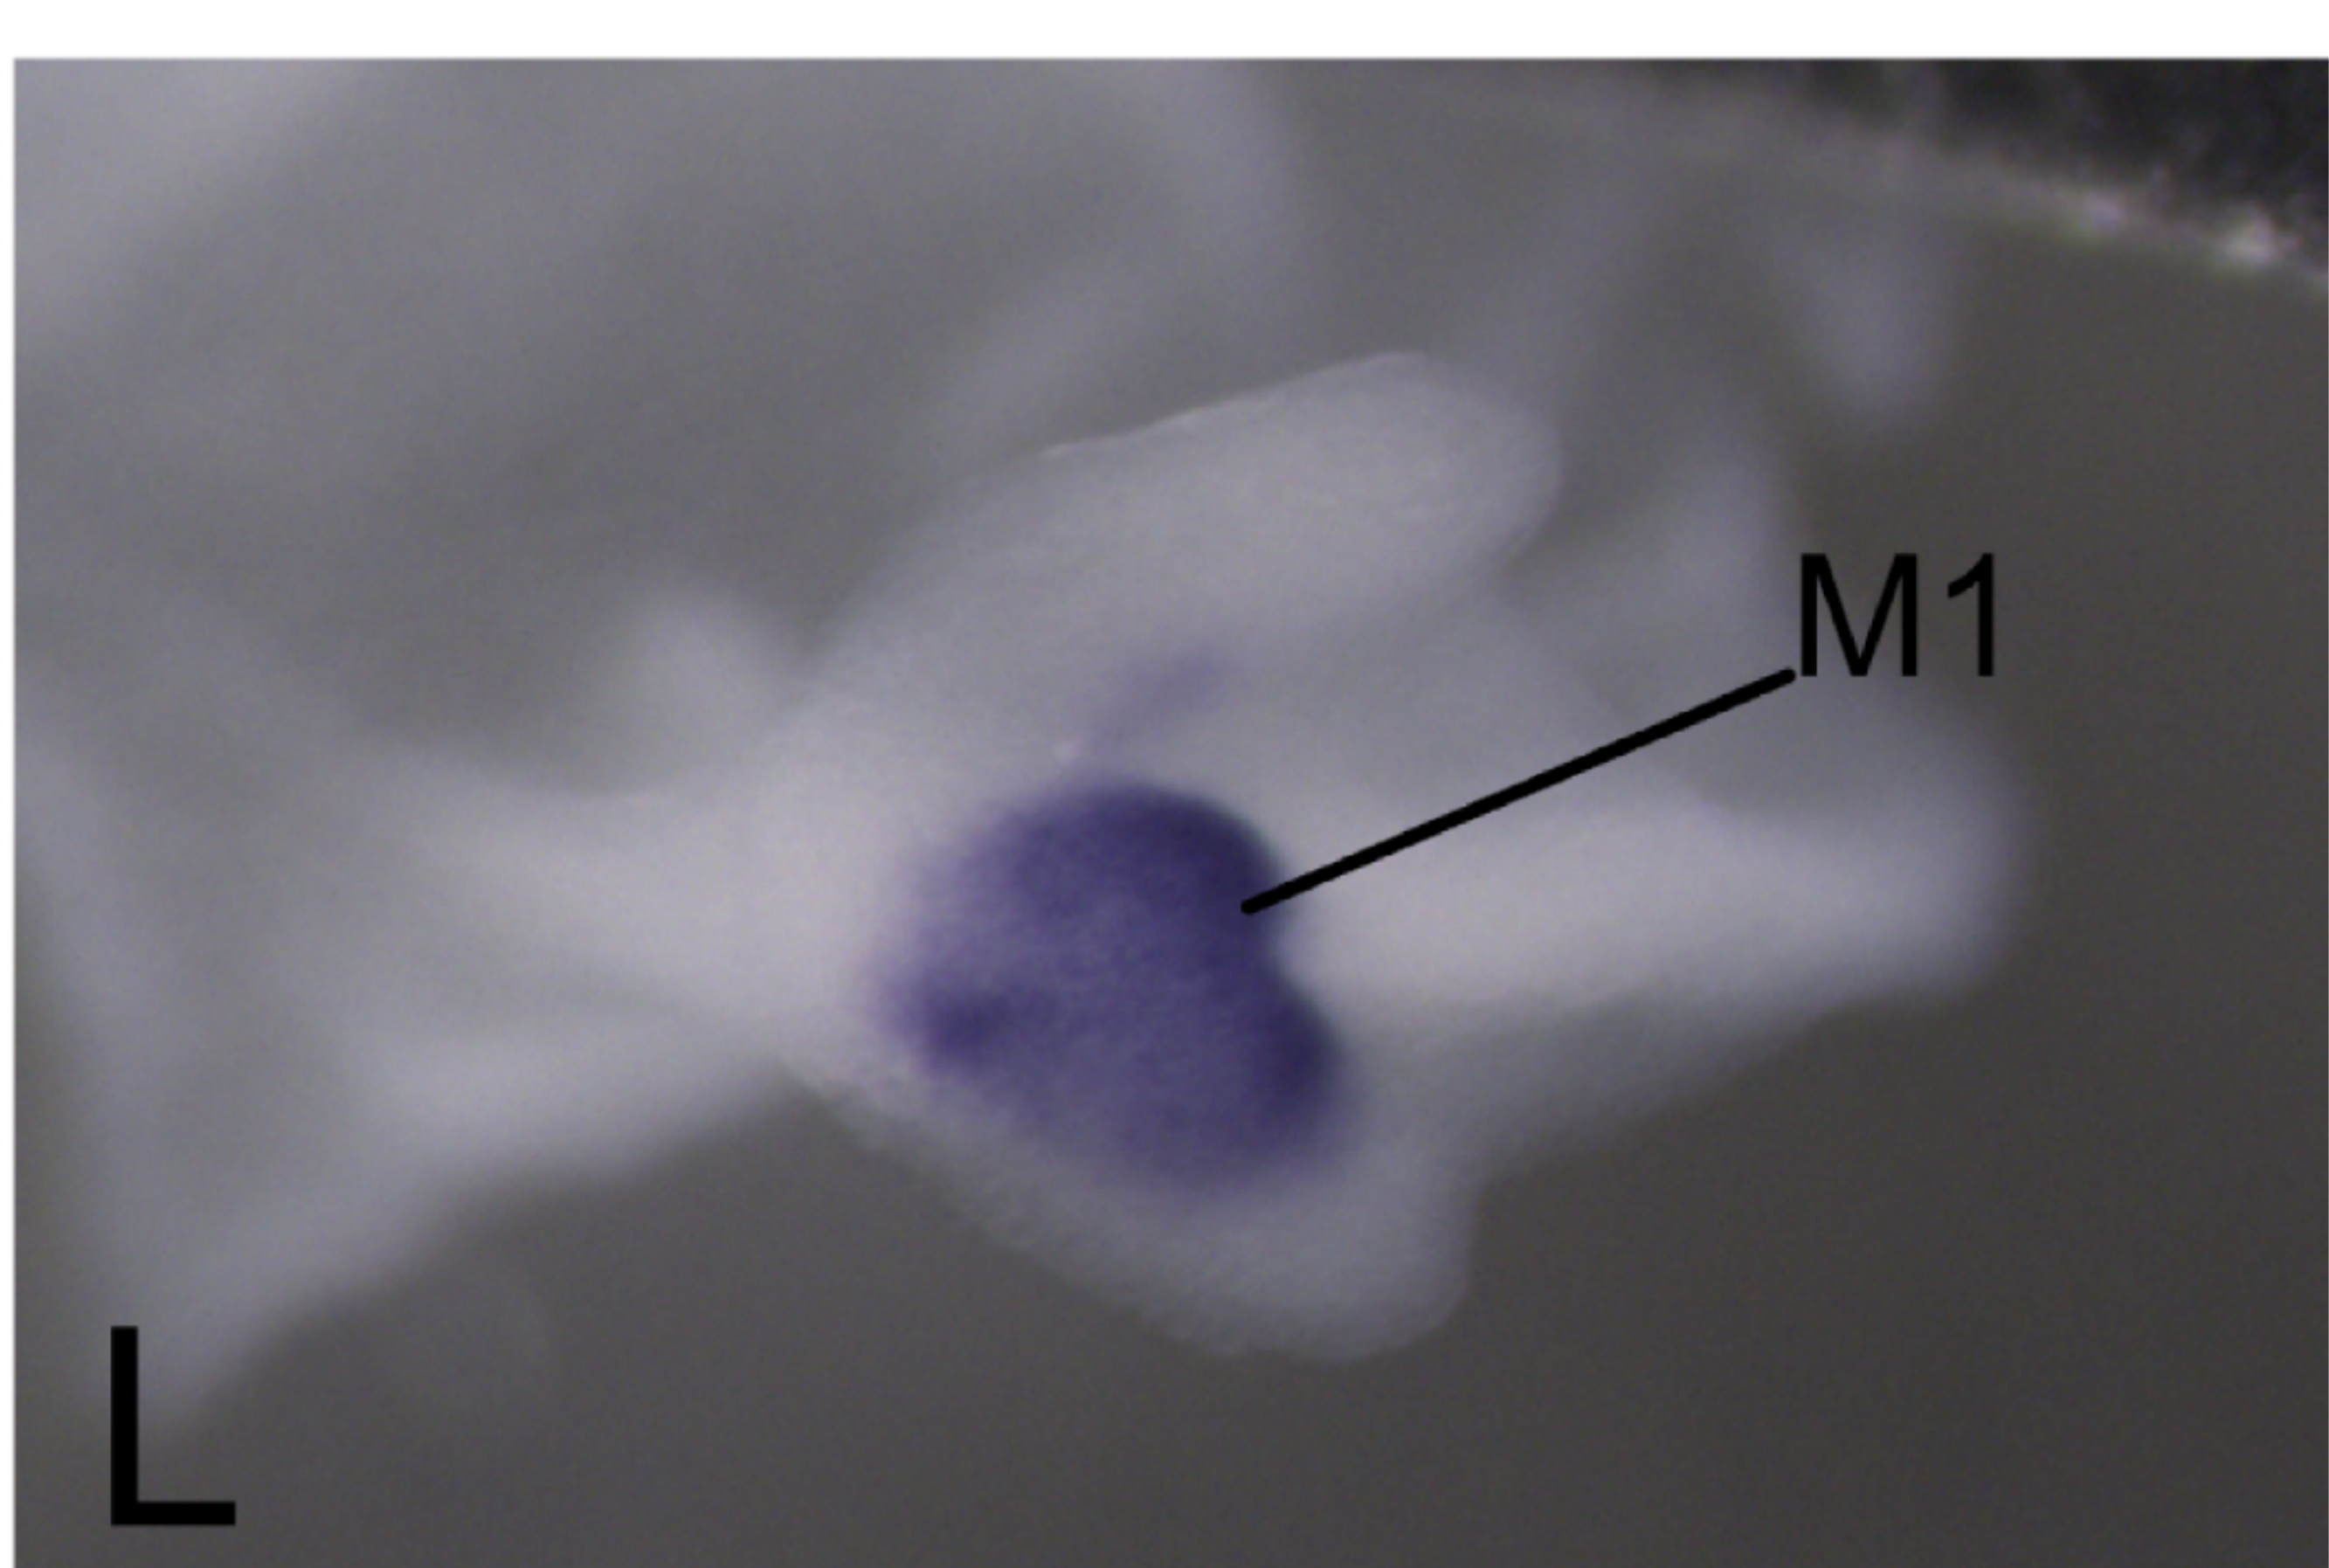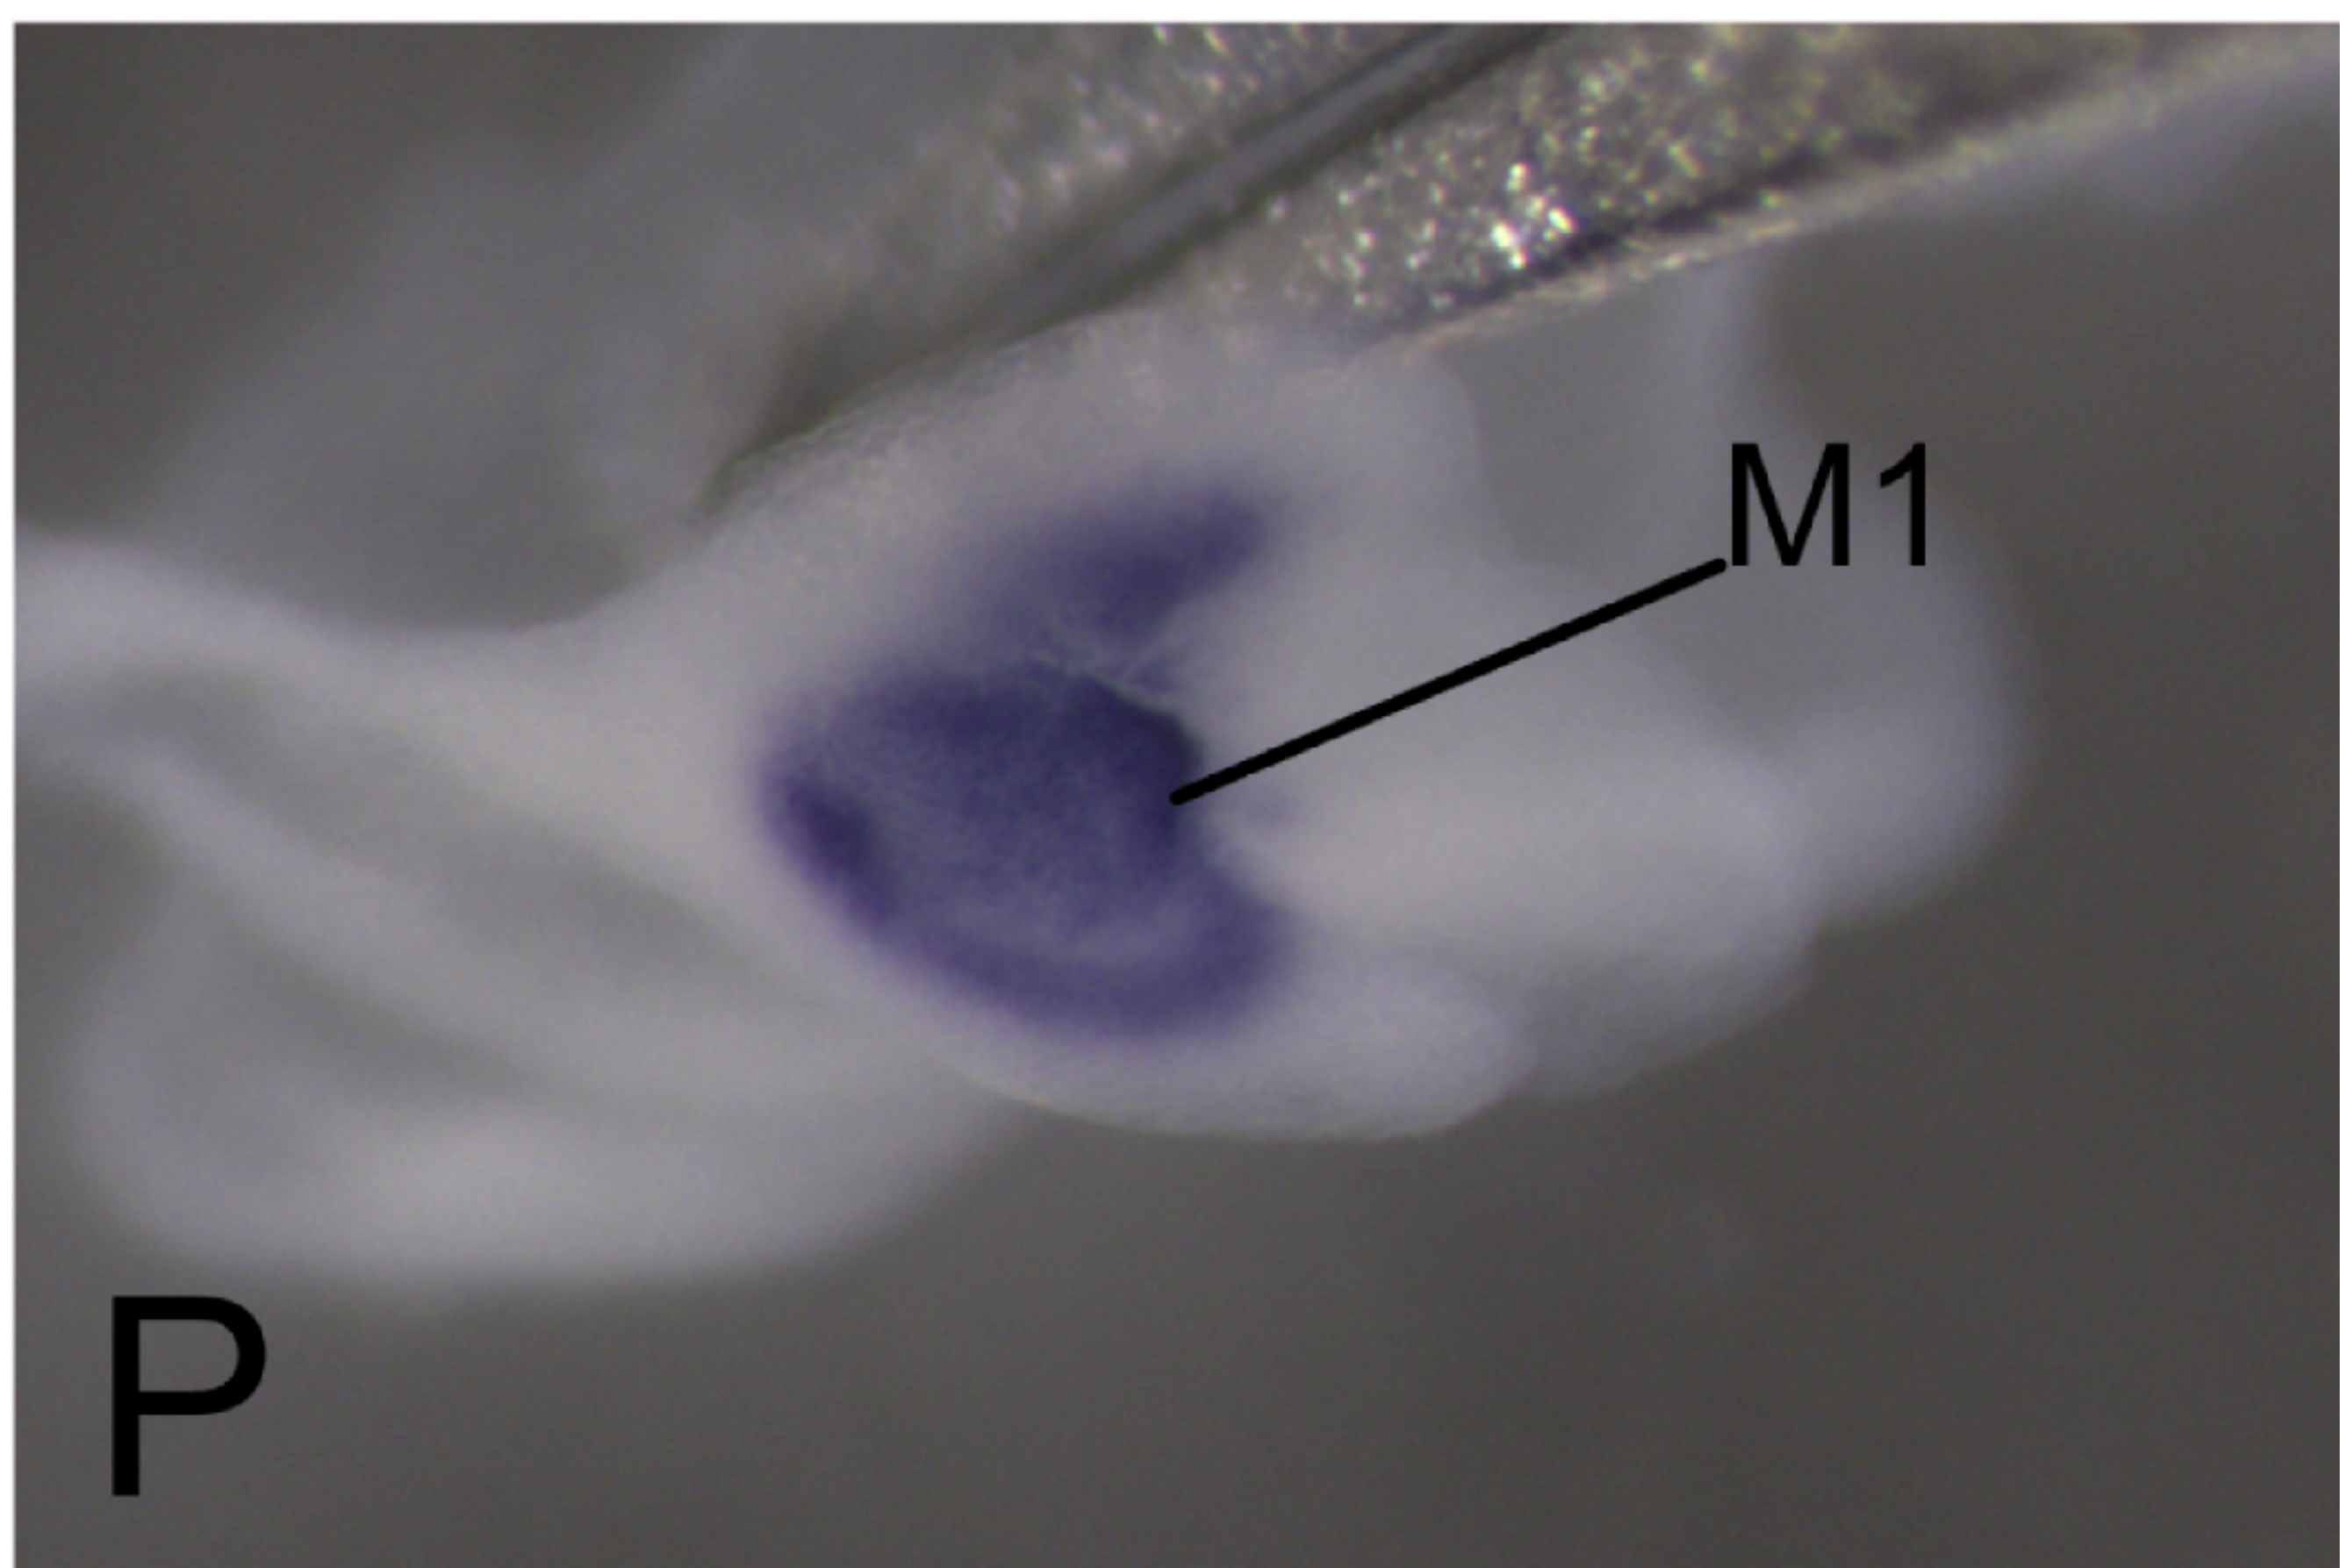

200  $\mu$ m

Supplement: supp [file elife-50103-supp-v1.zip › elife_poa_e50103_Figure_2_figure_supplement_3.pdf]

**A**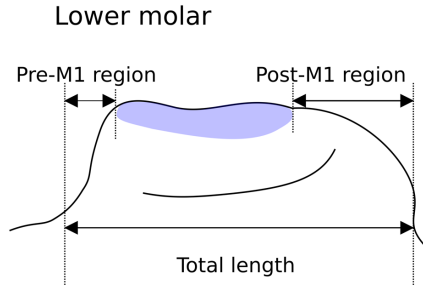**B**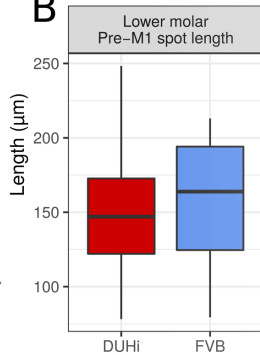**C**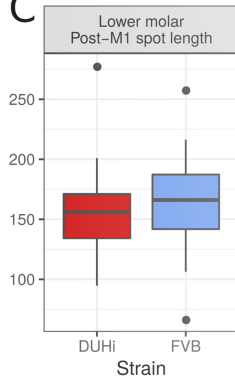**D**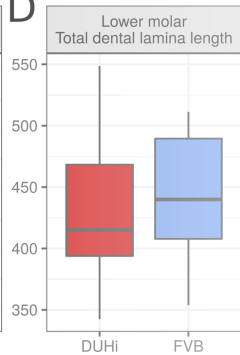

Supplement: supp [file elife-50103-supp-v1.zip › elife_poa_e50103_Figure_4_figure_supplement_1.pdf]

DUHi

FVB

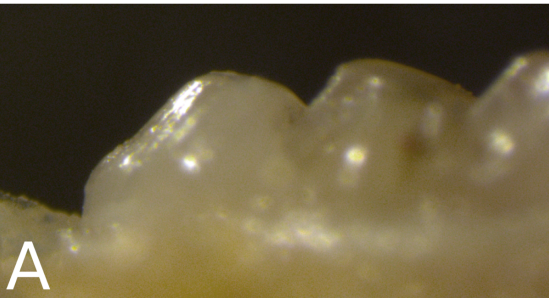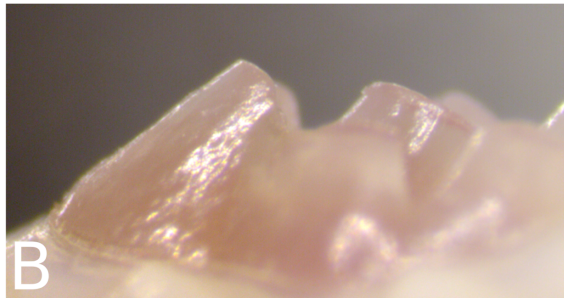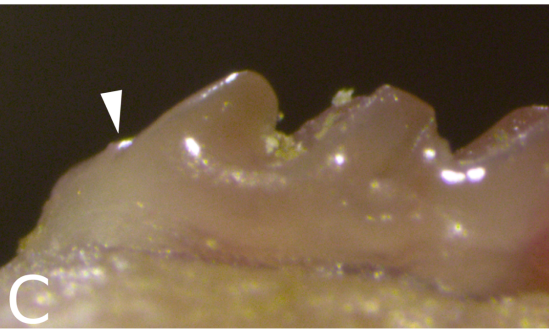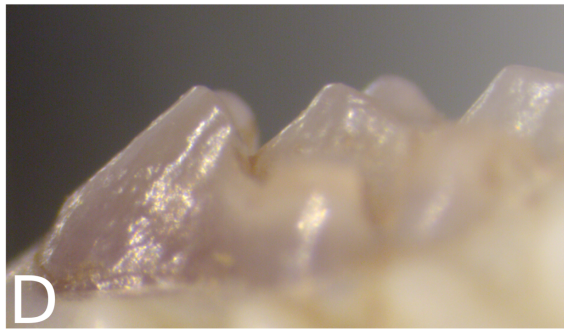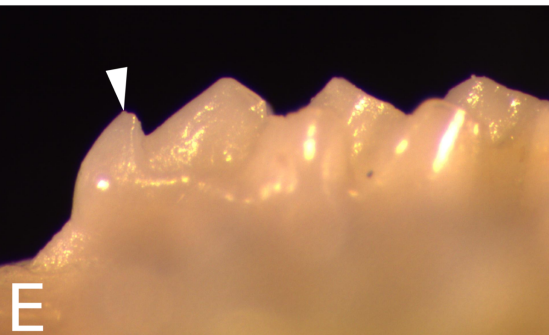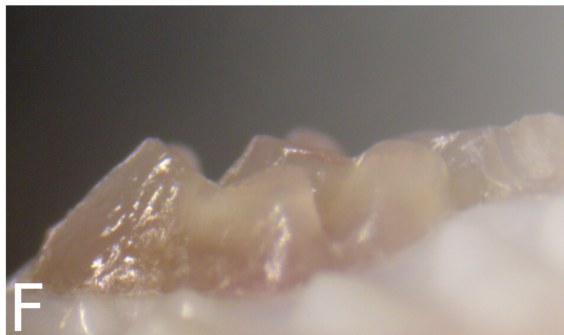

← Anterior

Posterior →

Supplement: supp [file elife-50103-supp-v1.zip › elife_poa_e50103_Figure_1_figure_supplement_1.pdf]

DUHi upper molars

15.25 cdpc

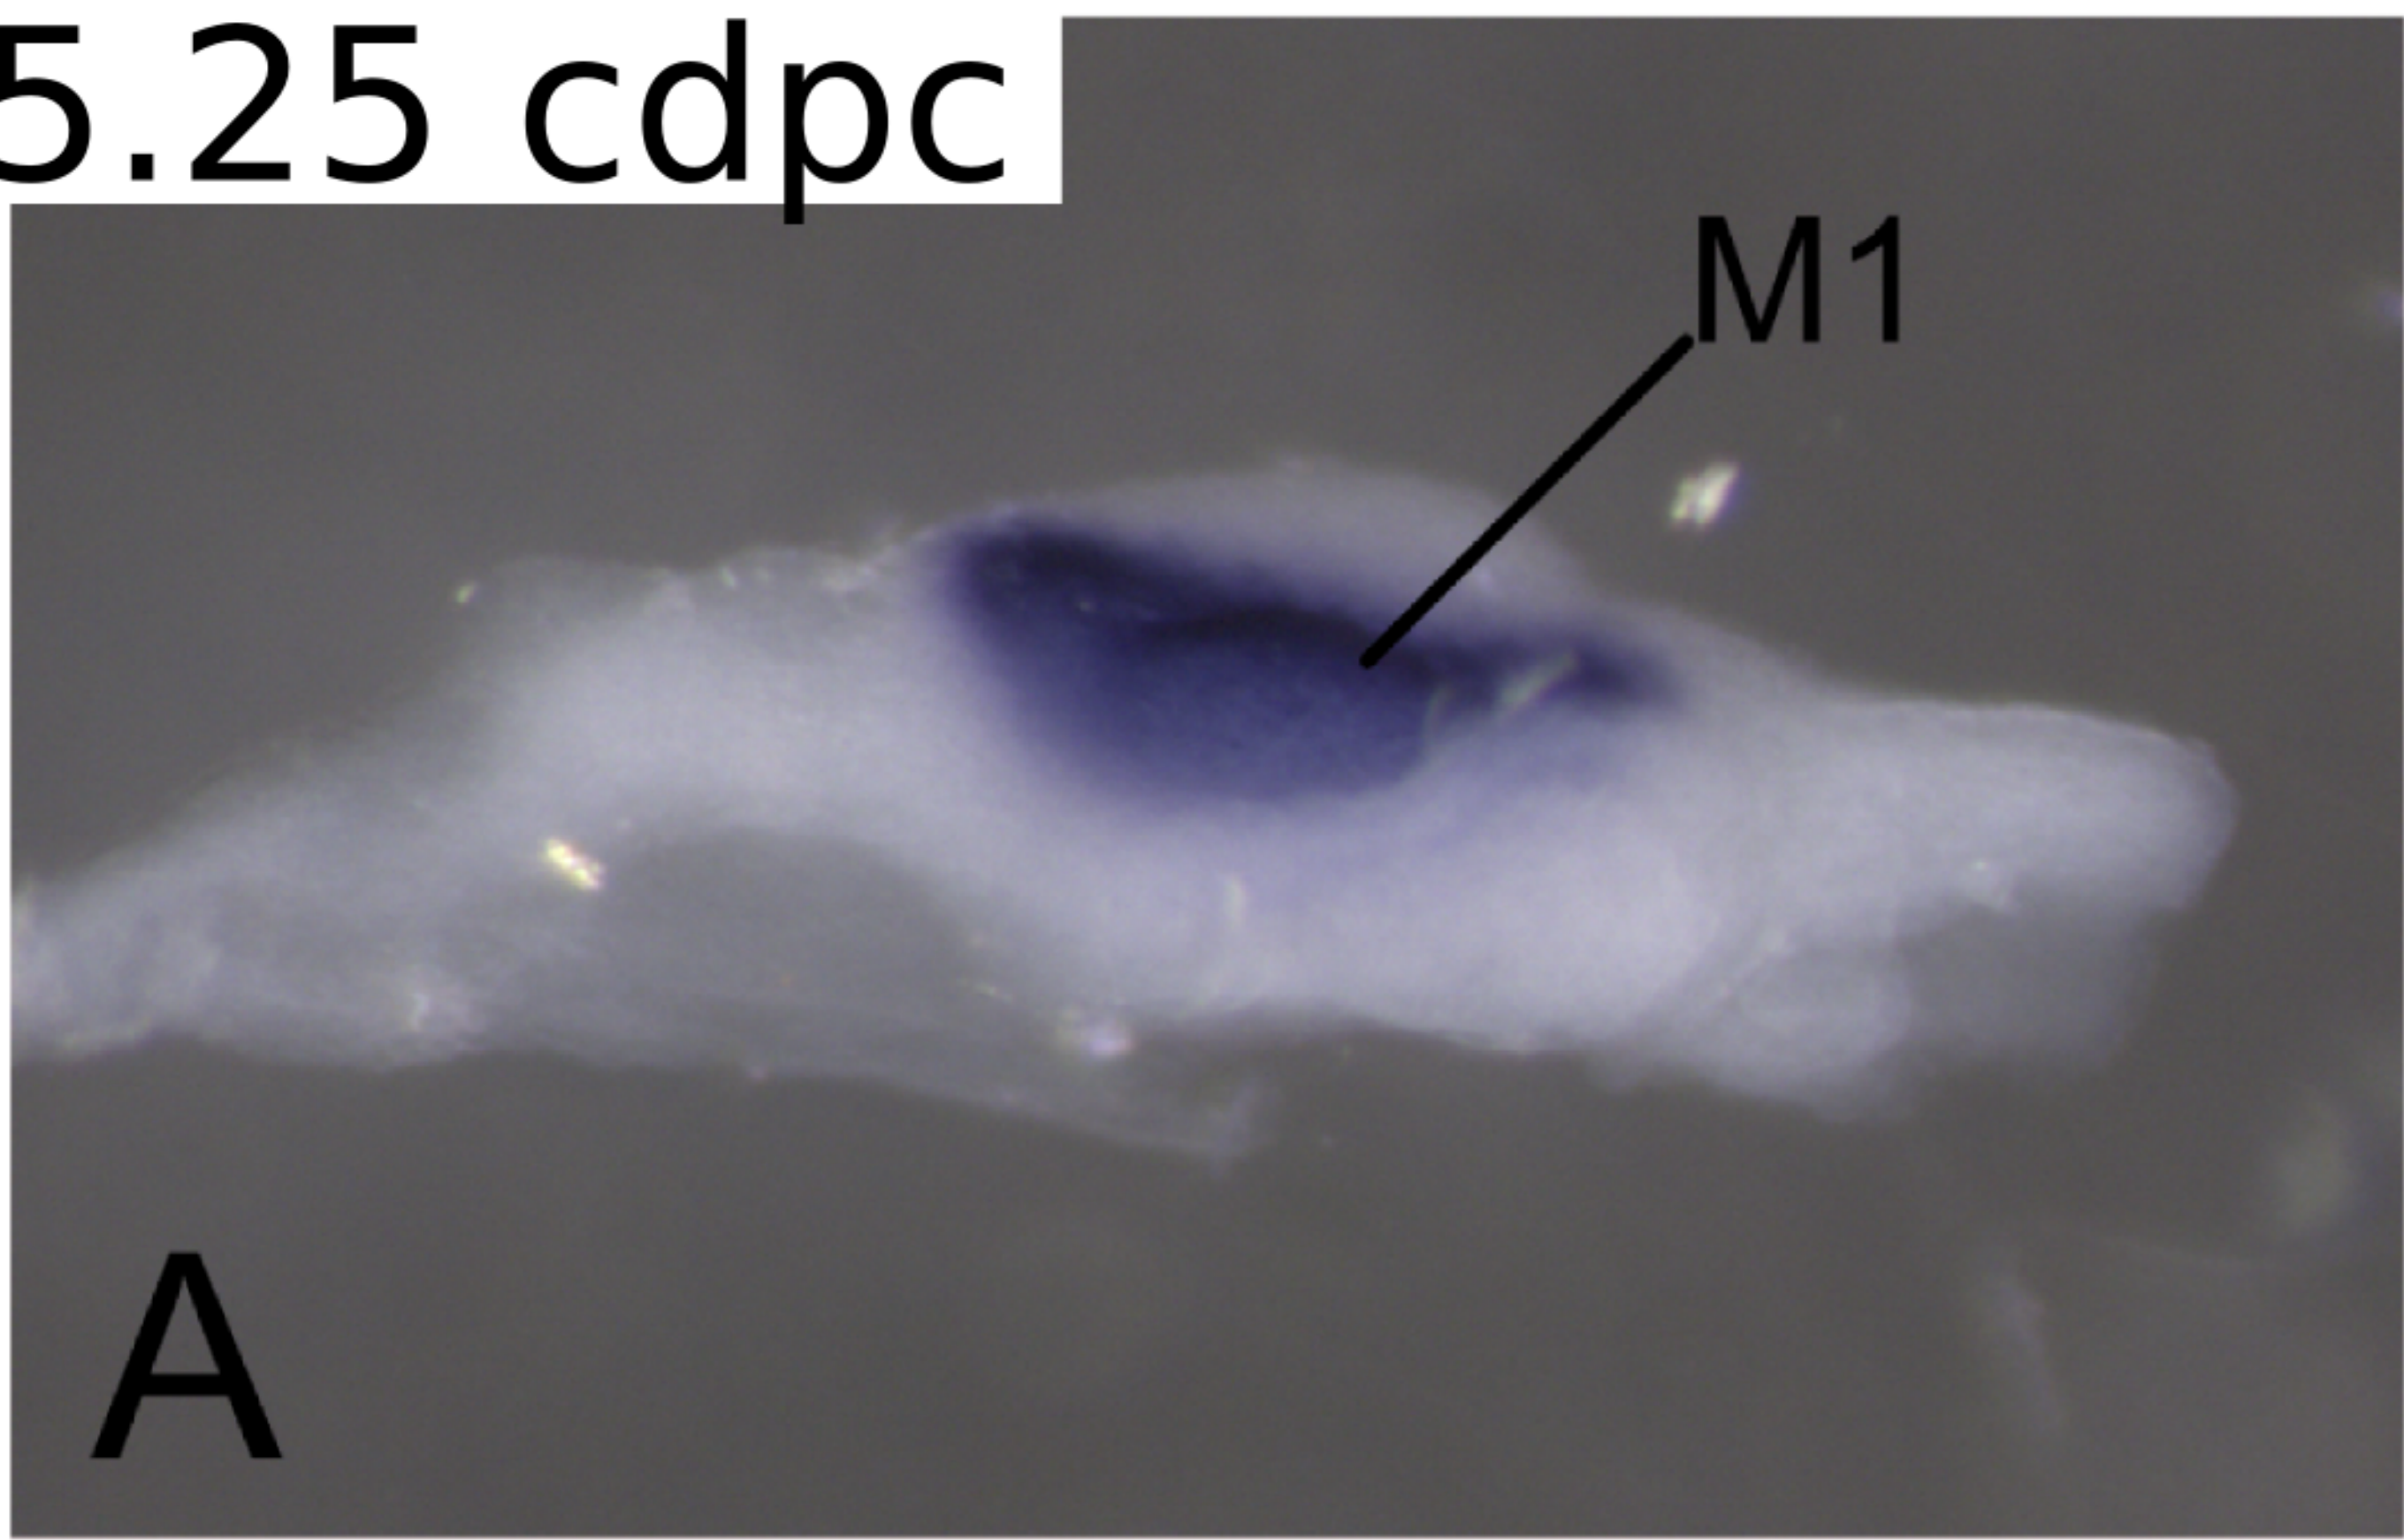

290mg

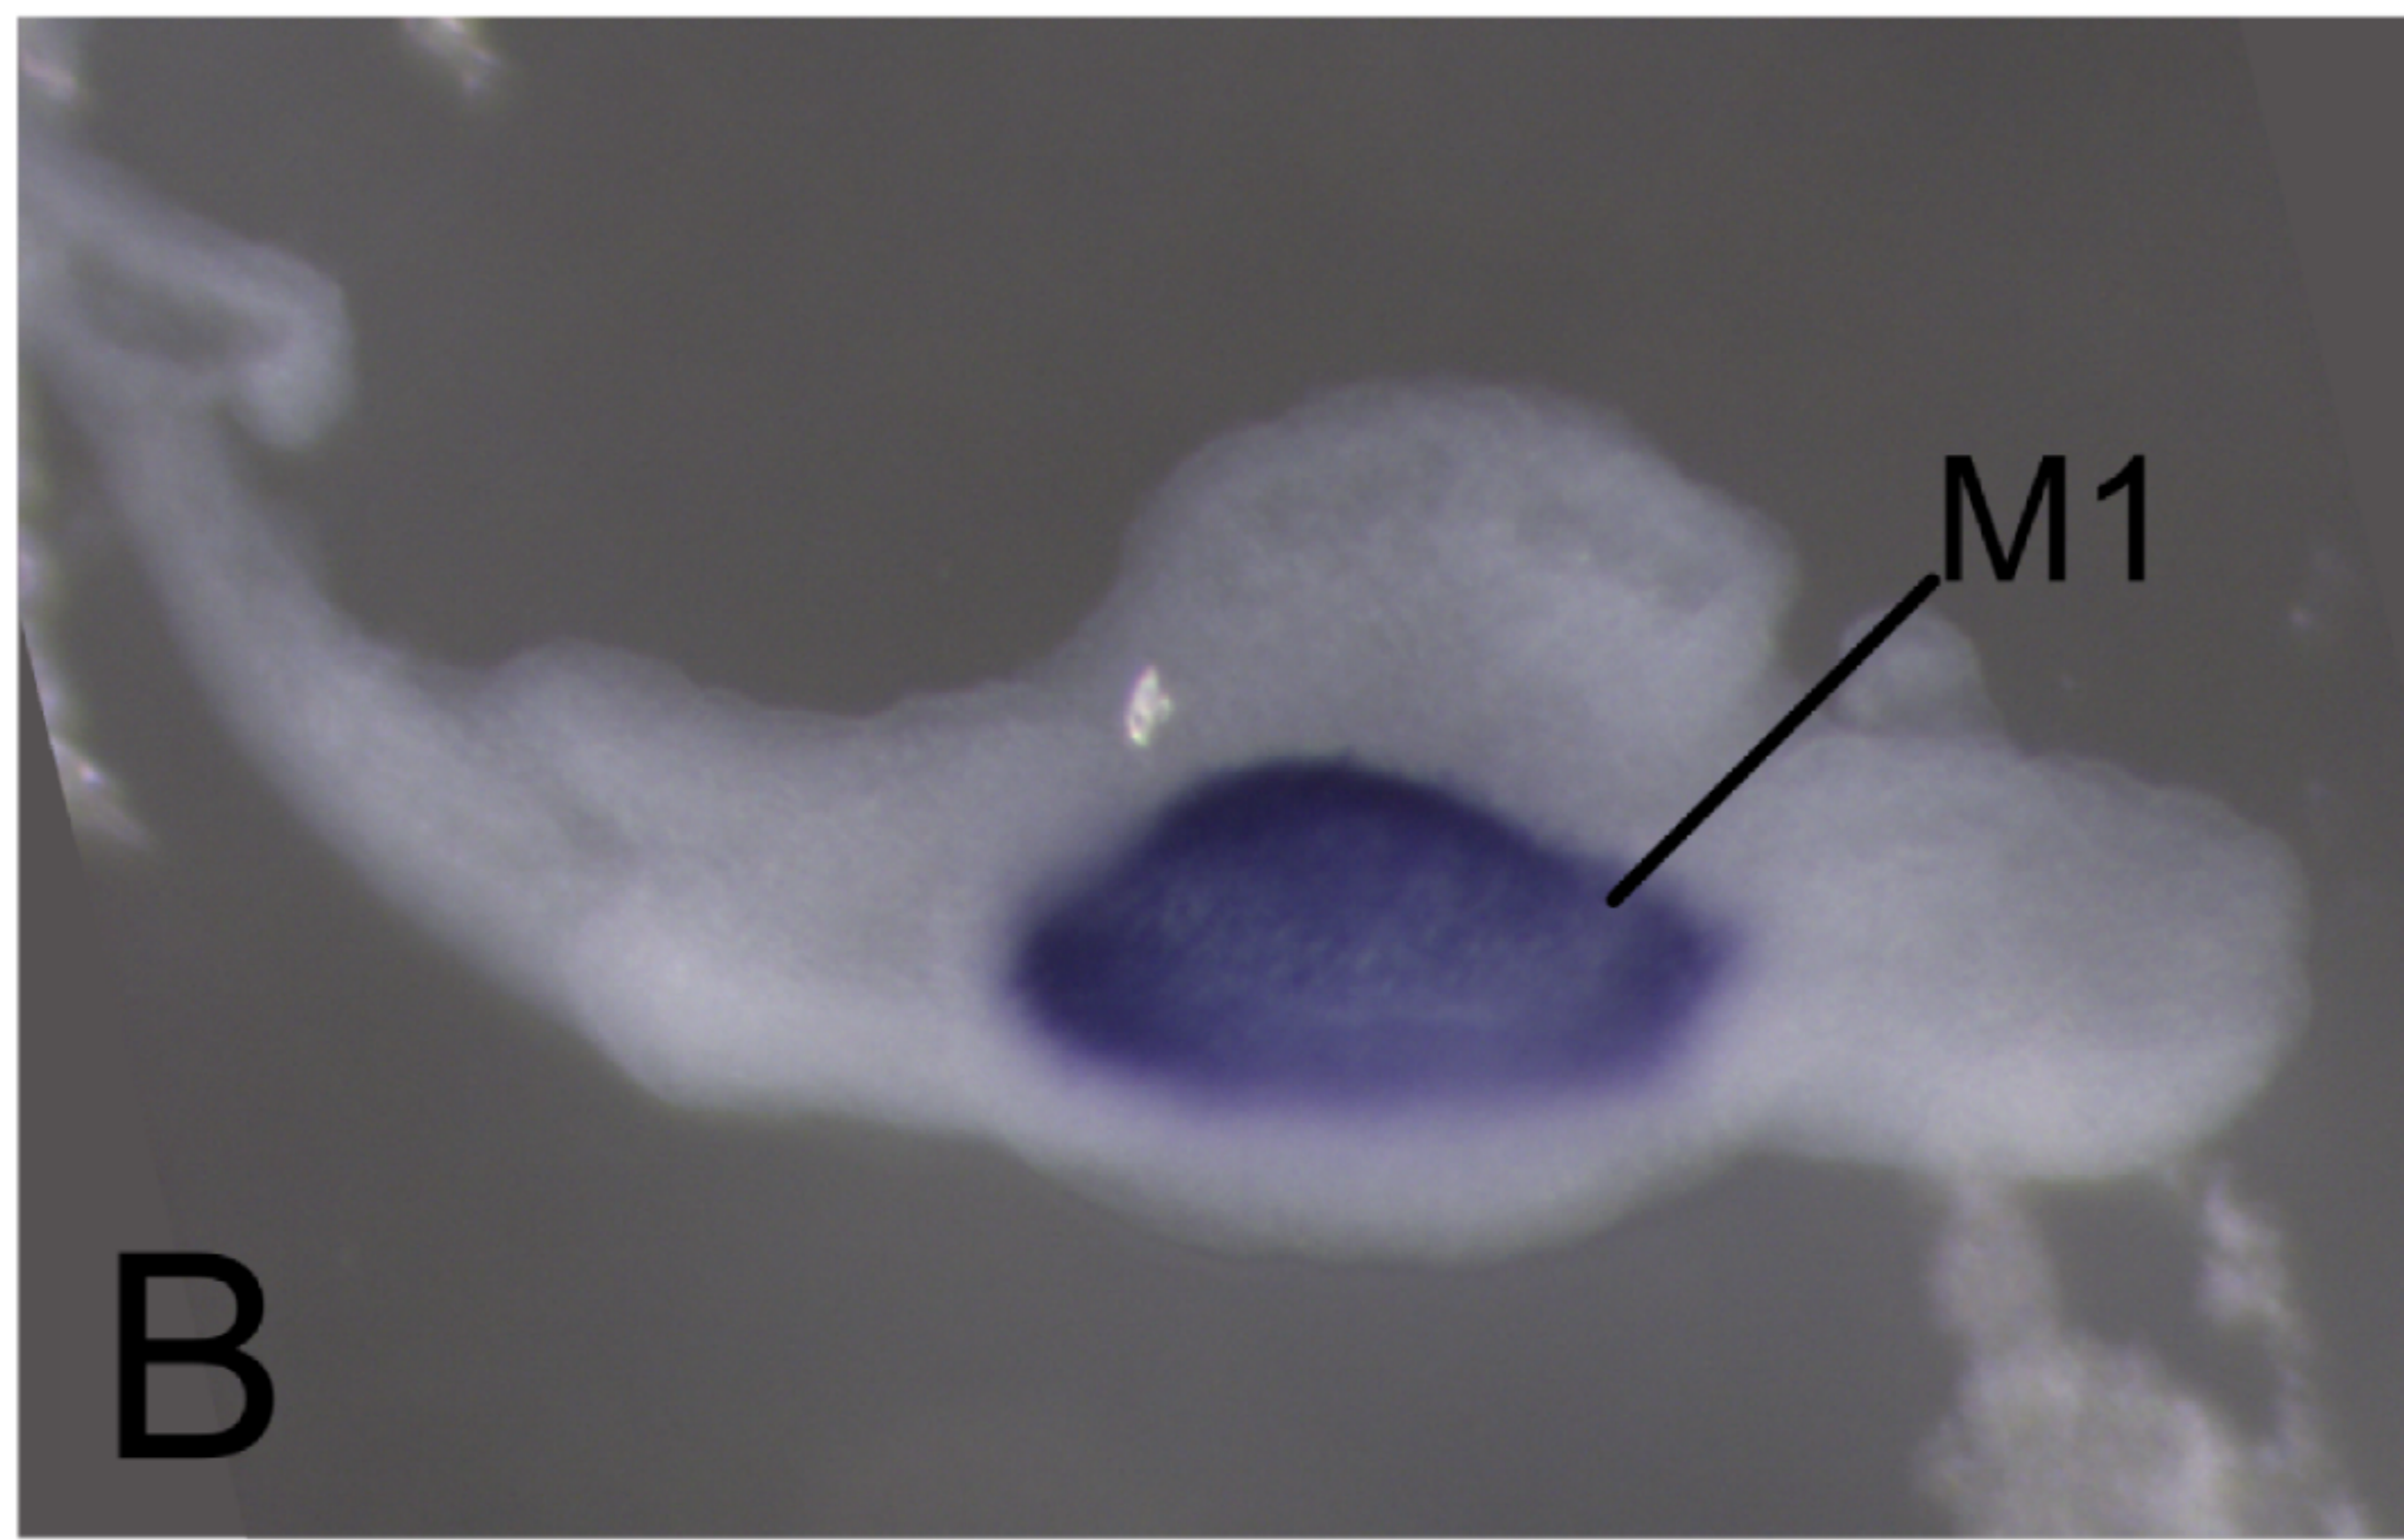

15.5 cdpc

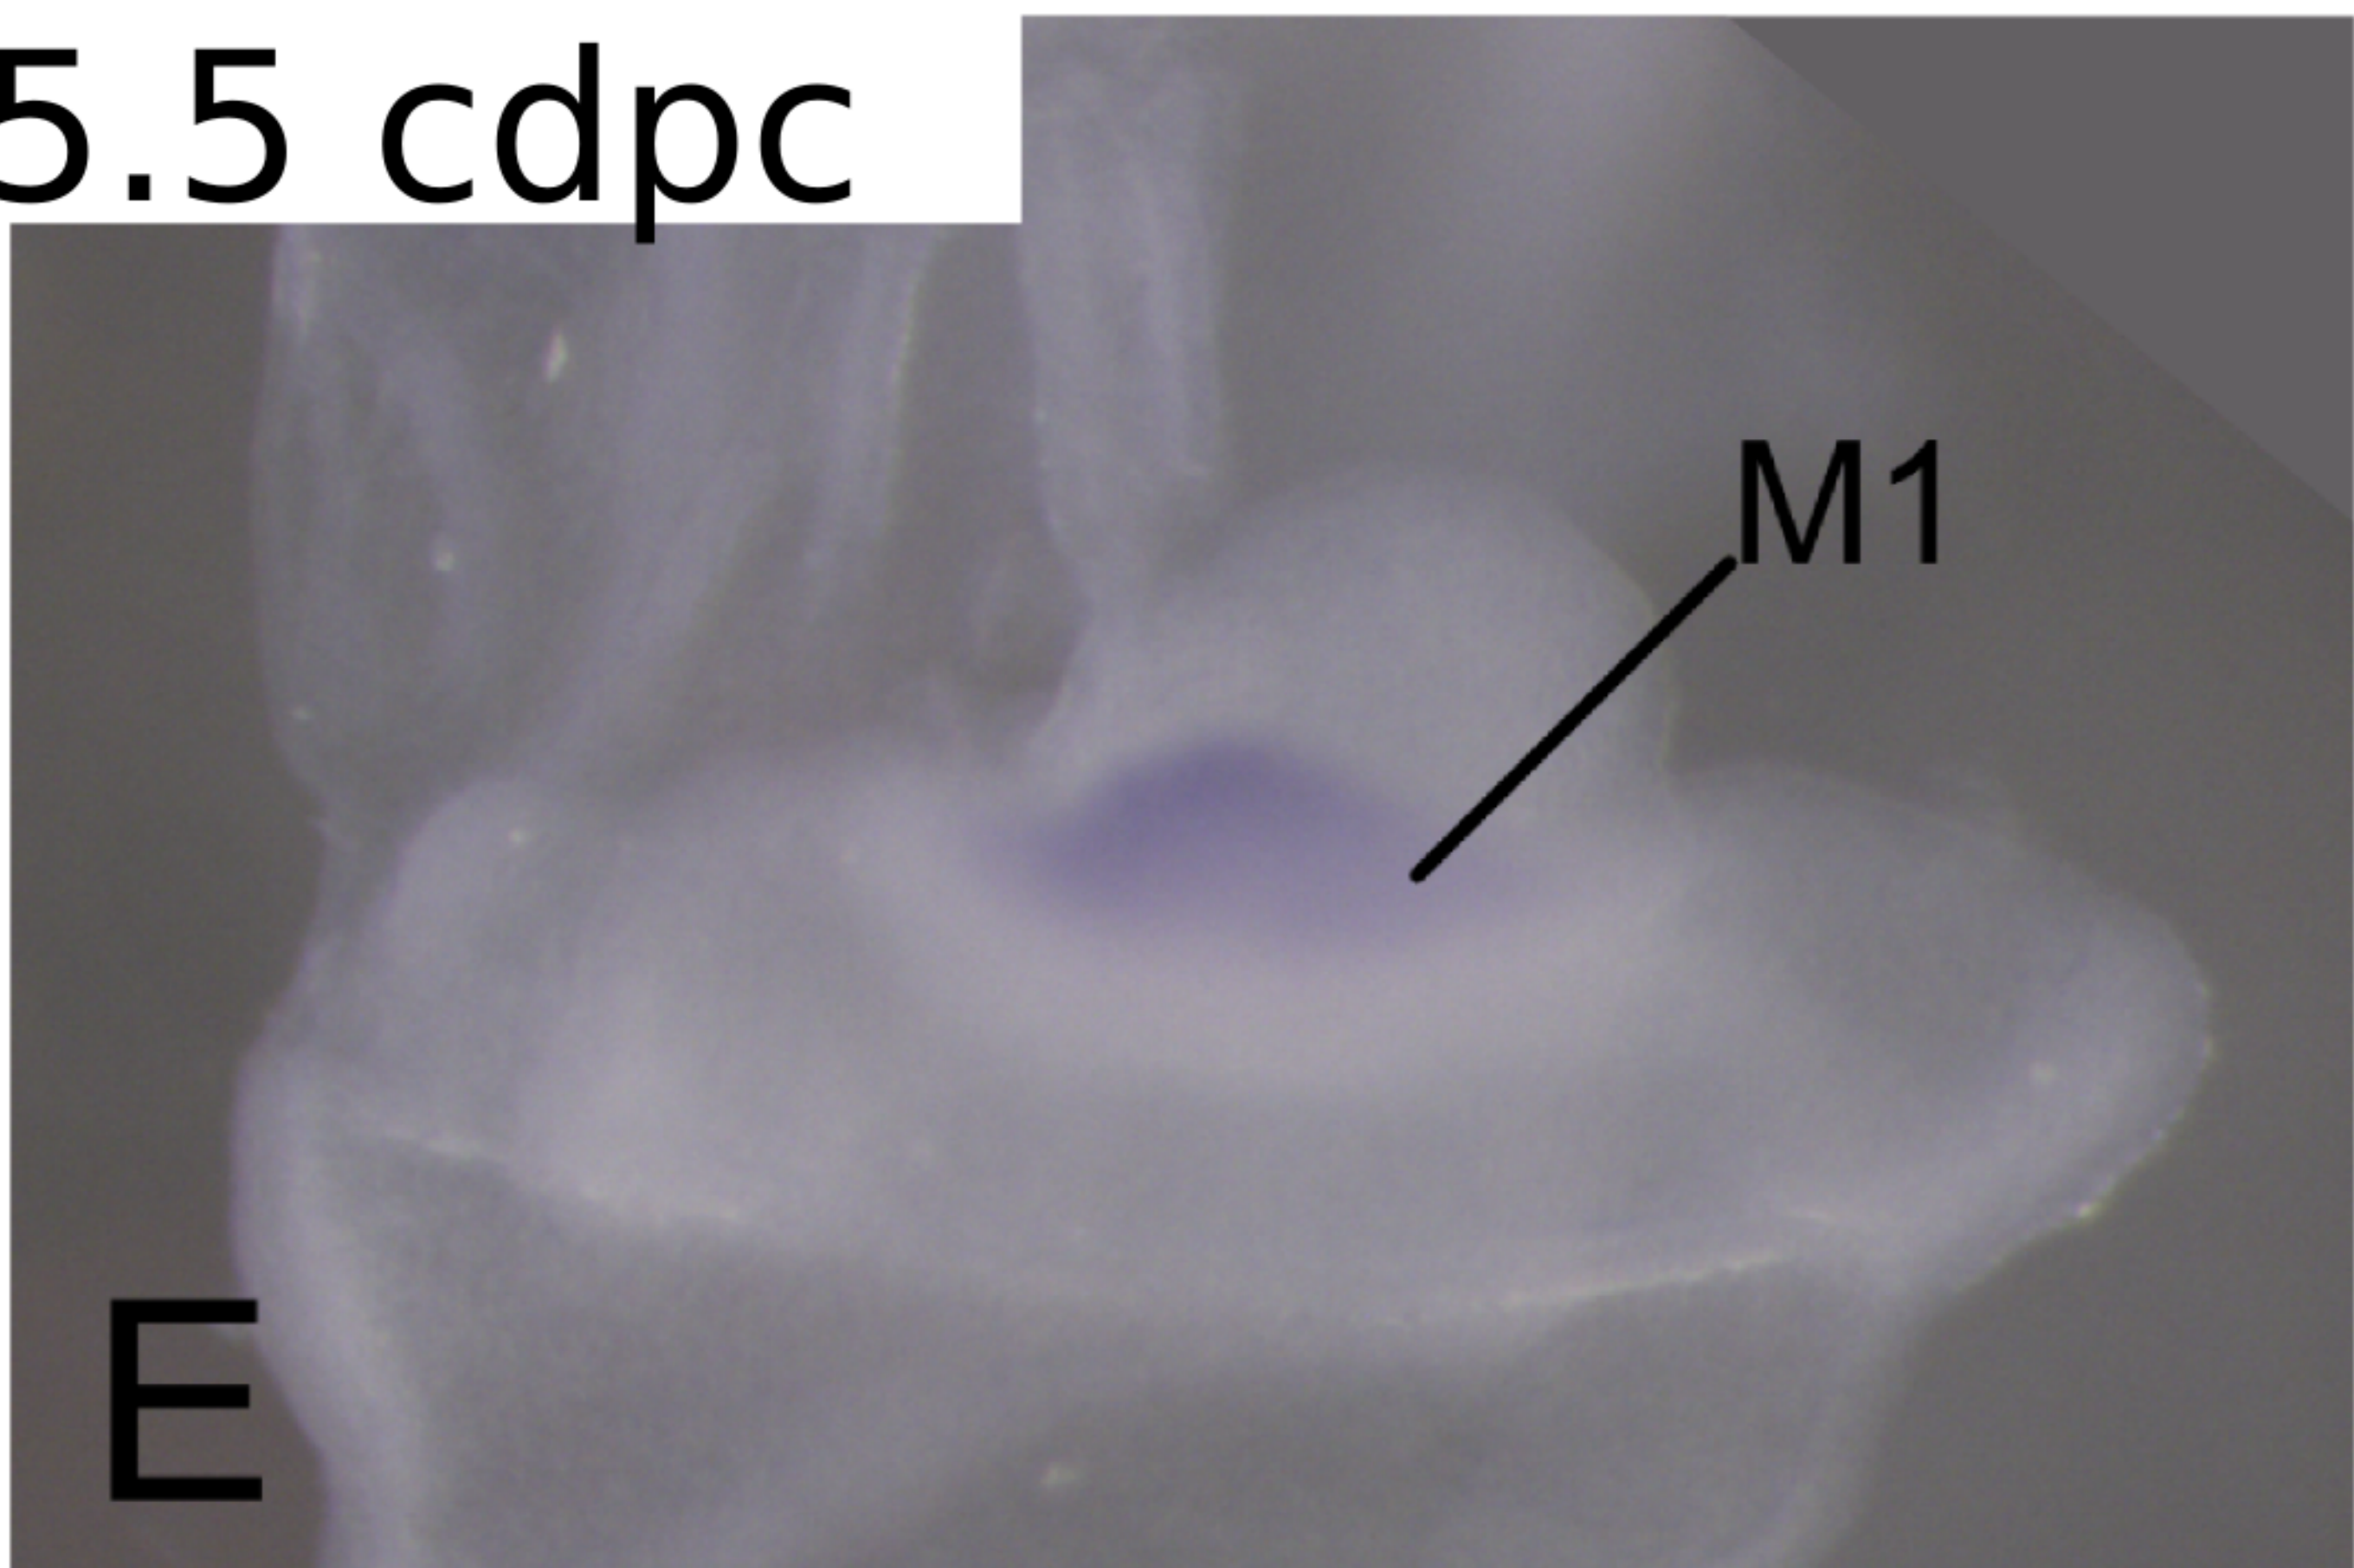

343mg

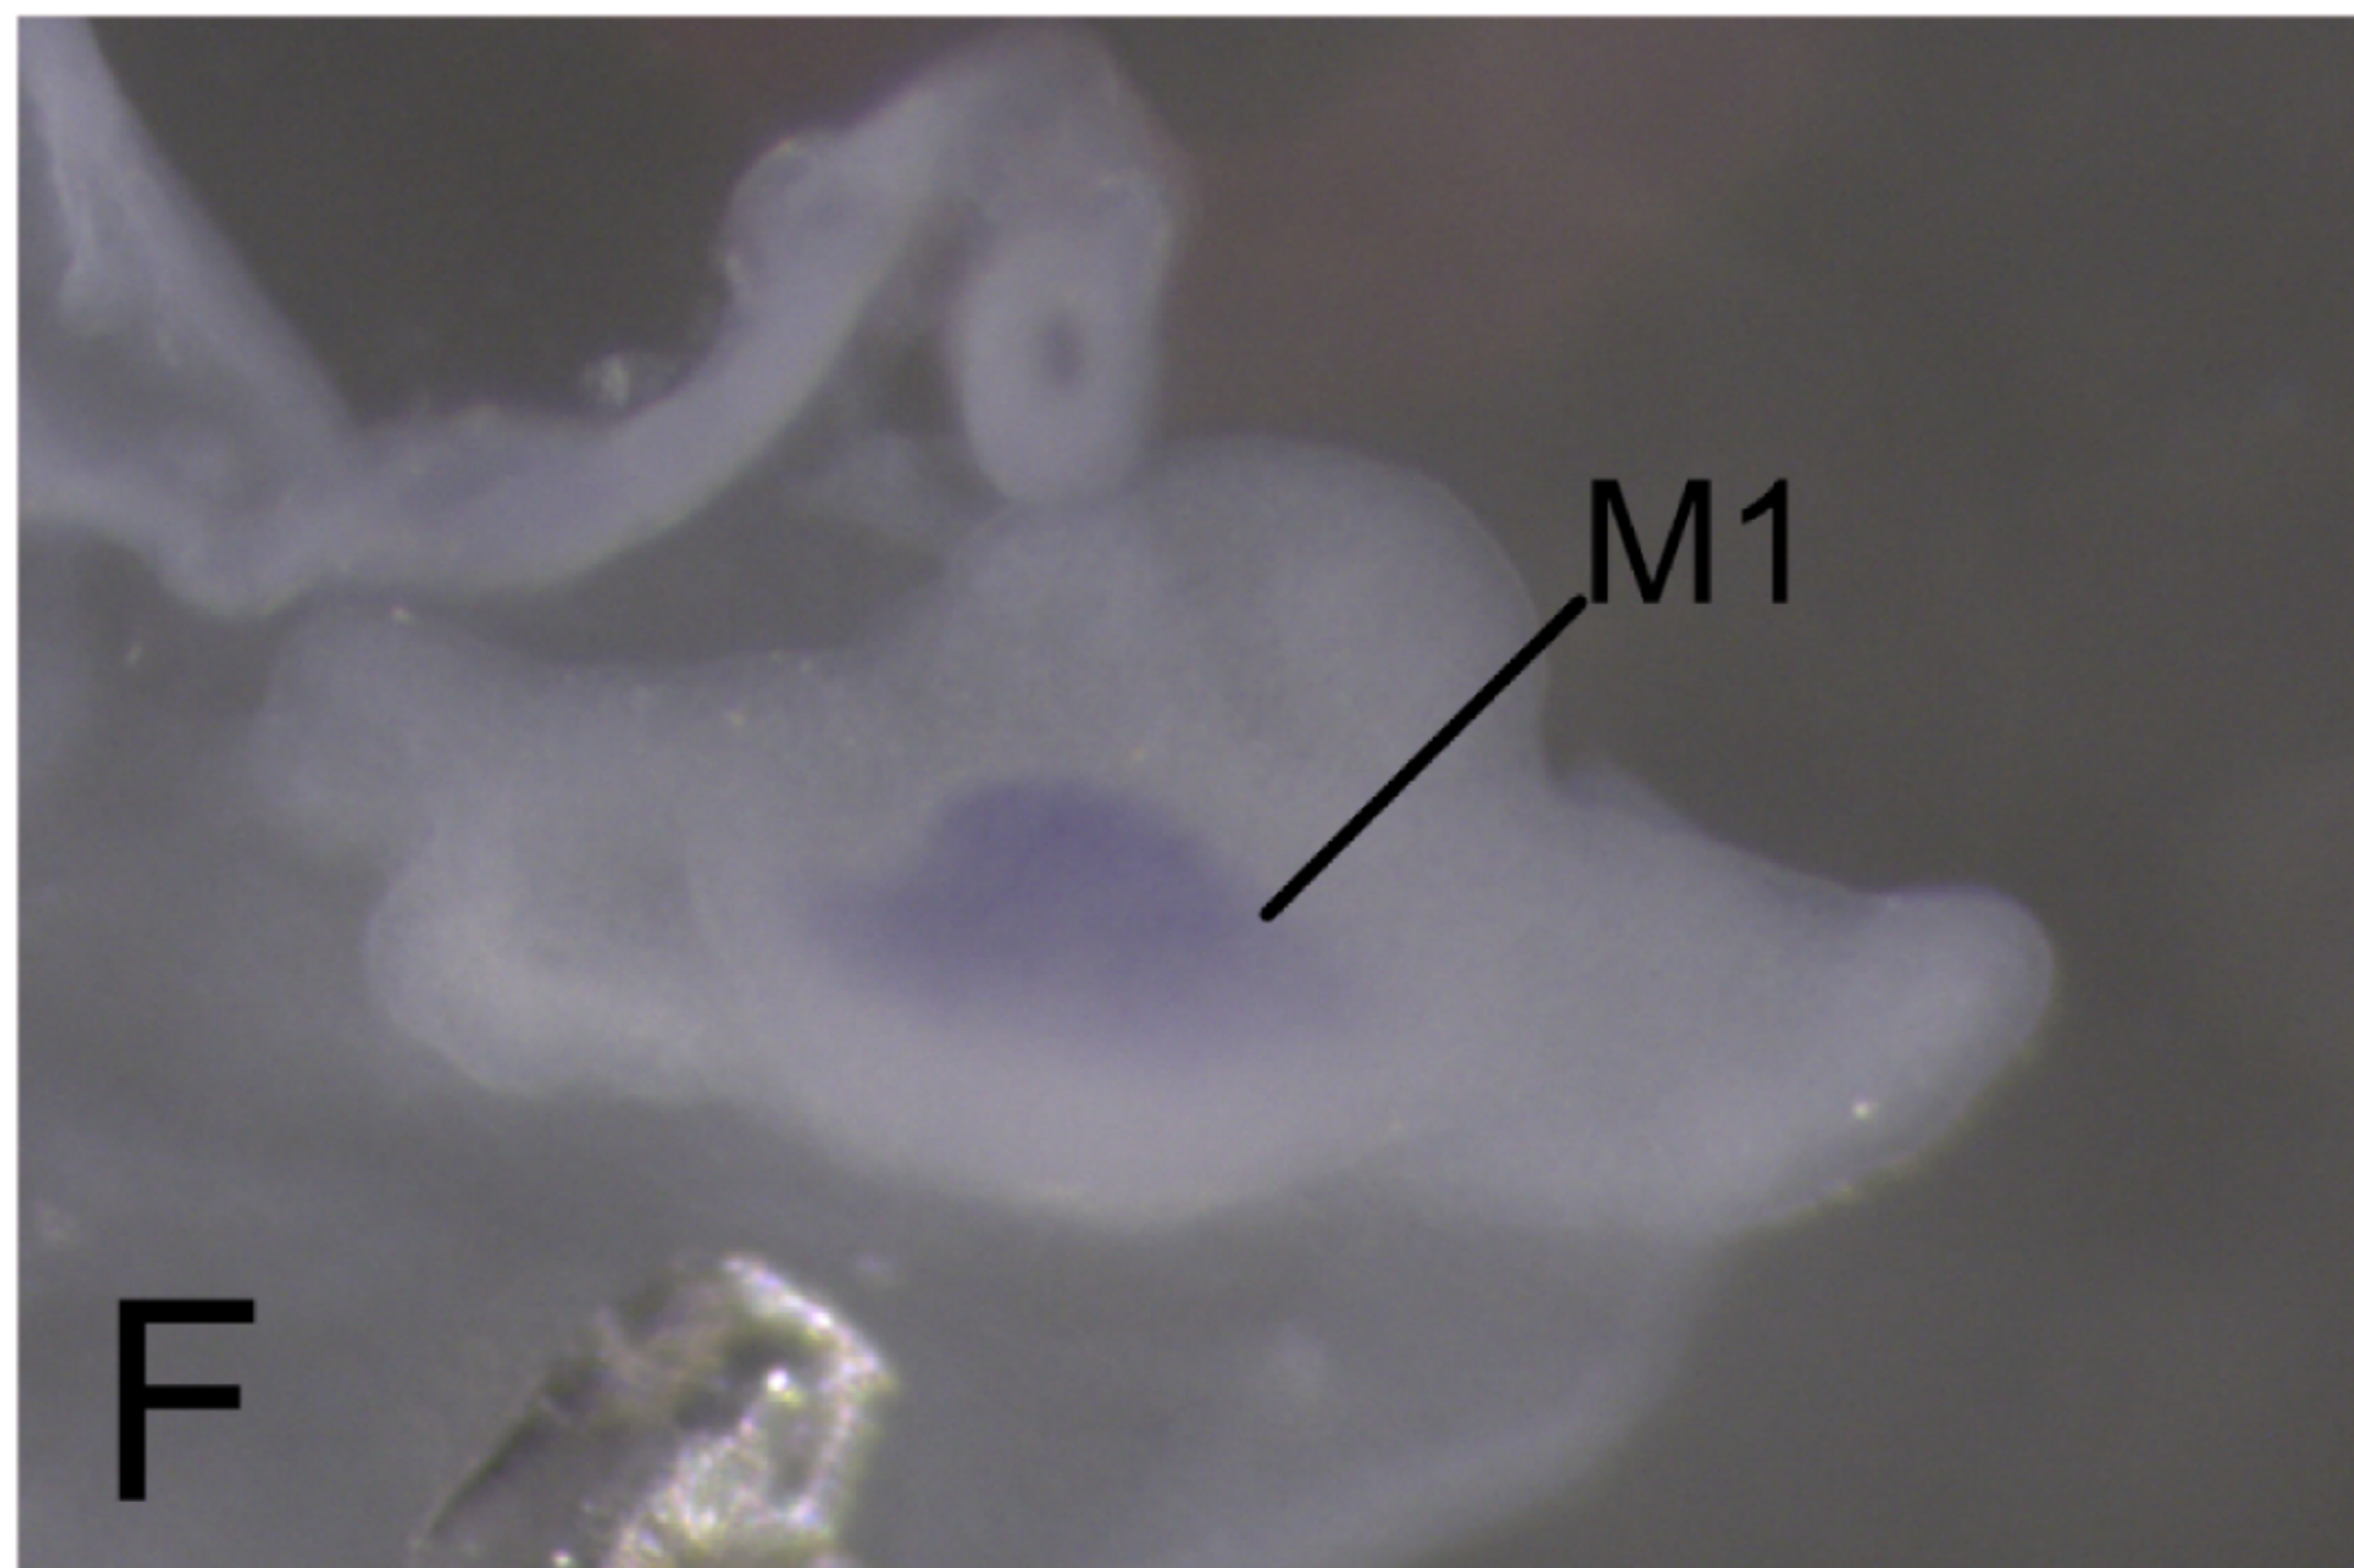

15.75 cdpc

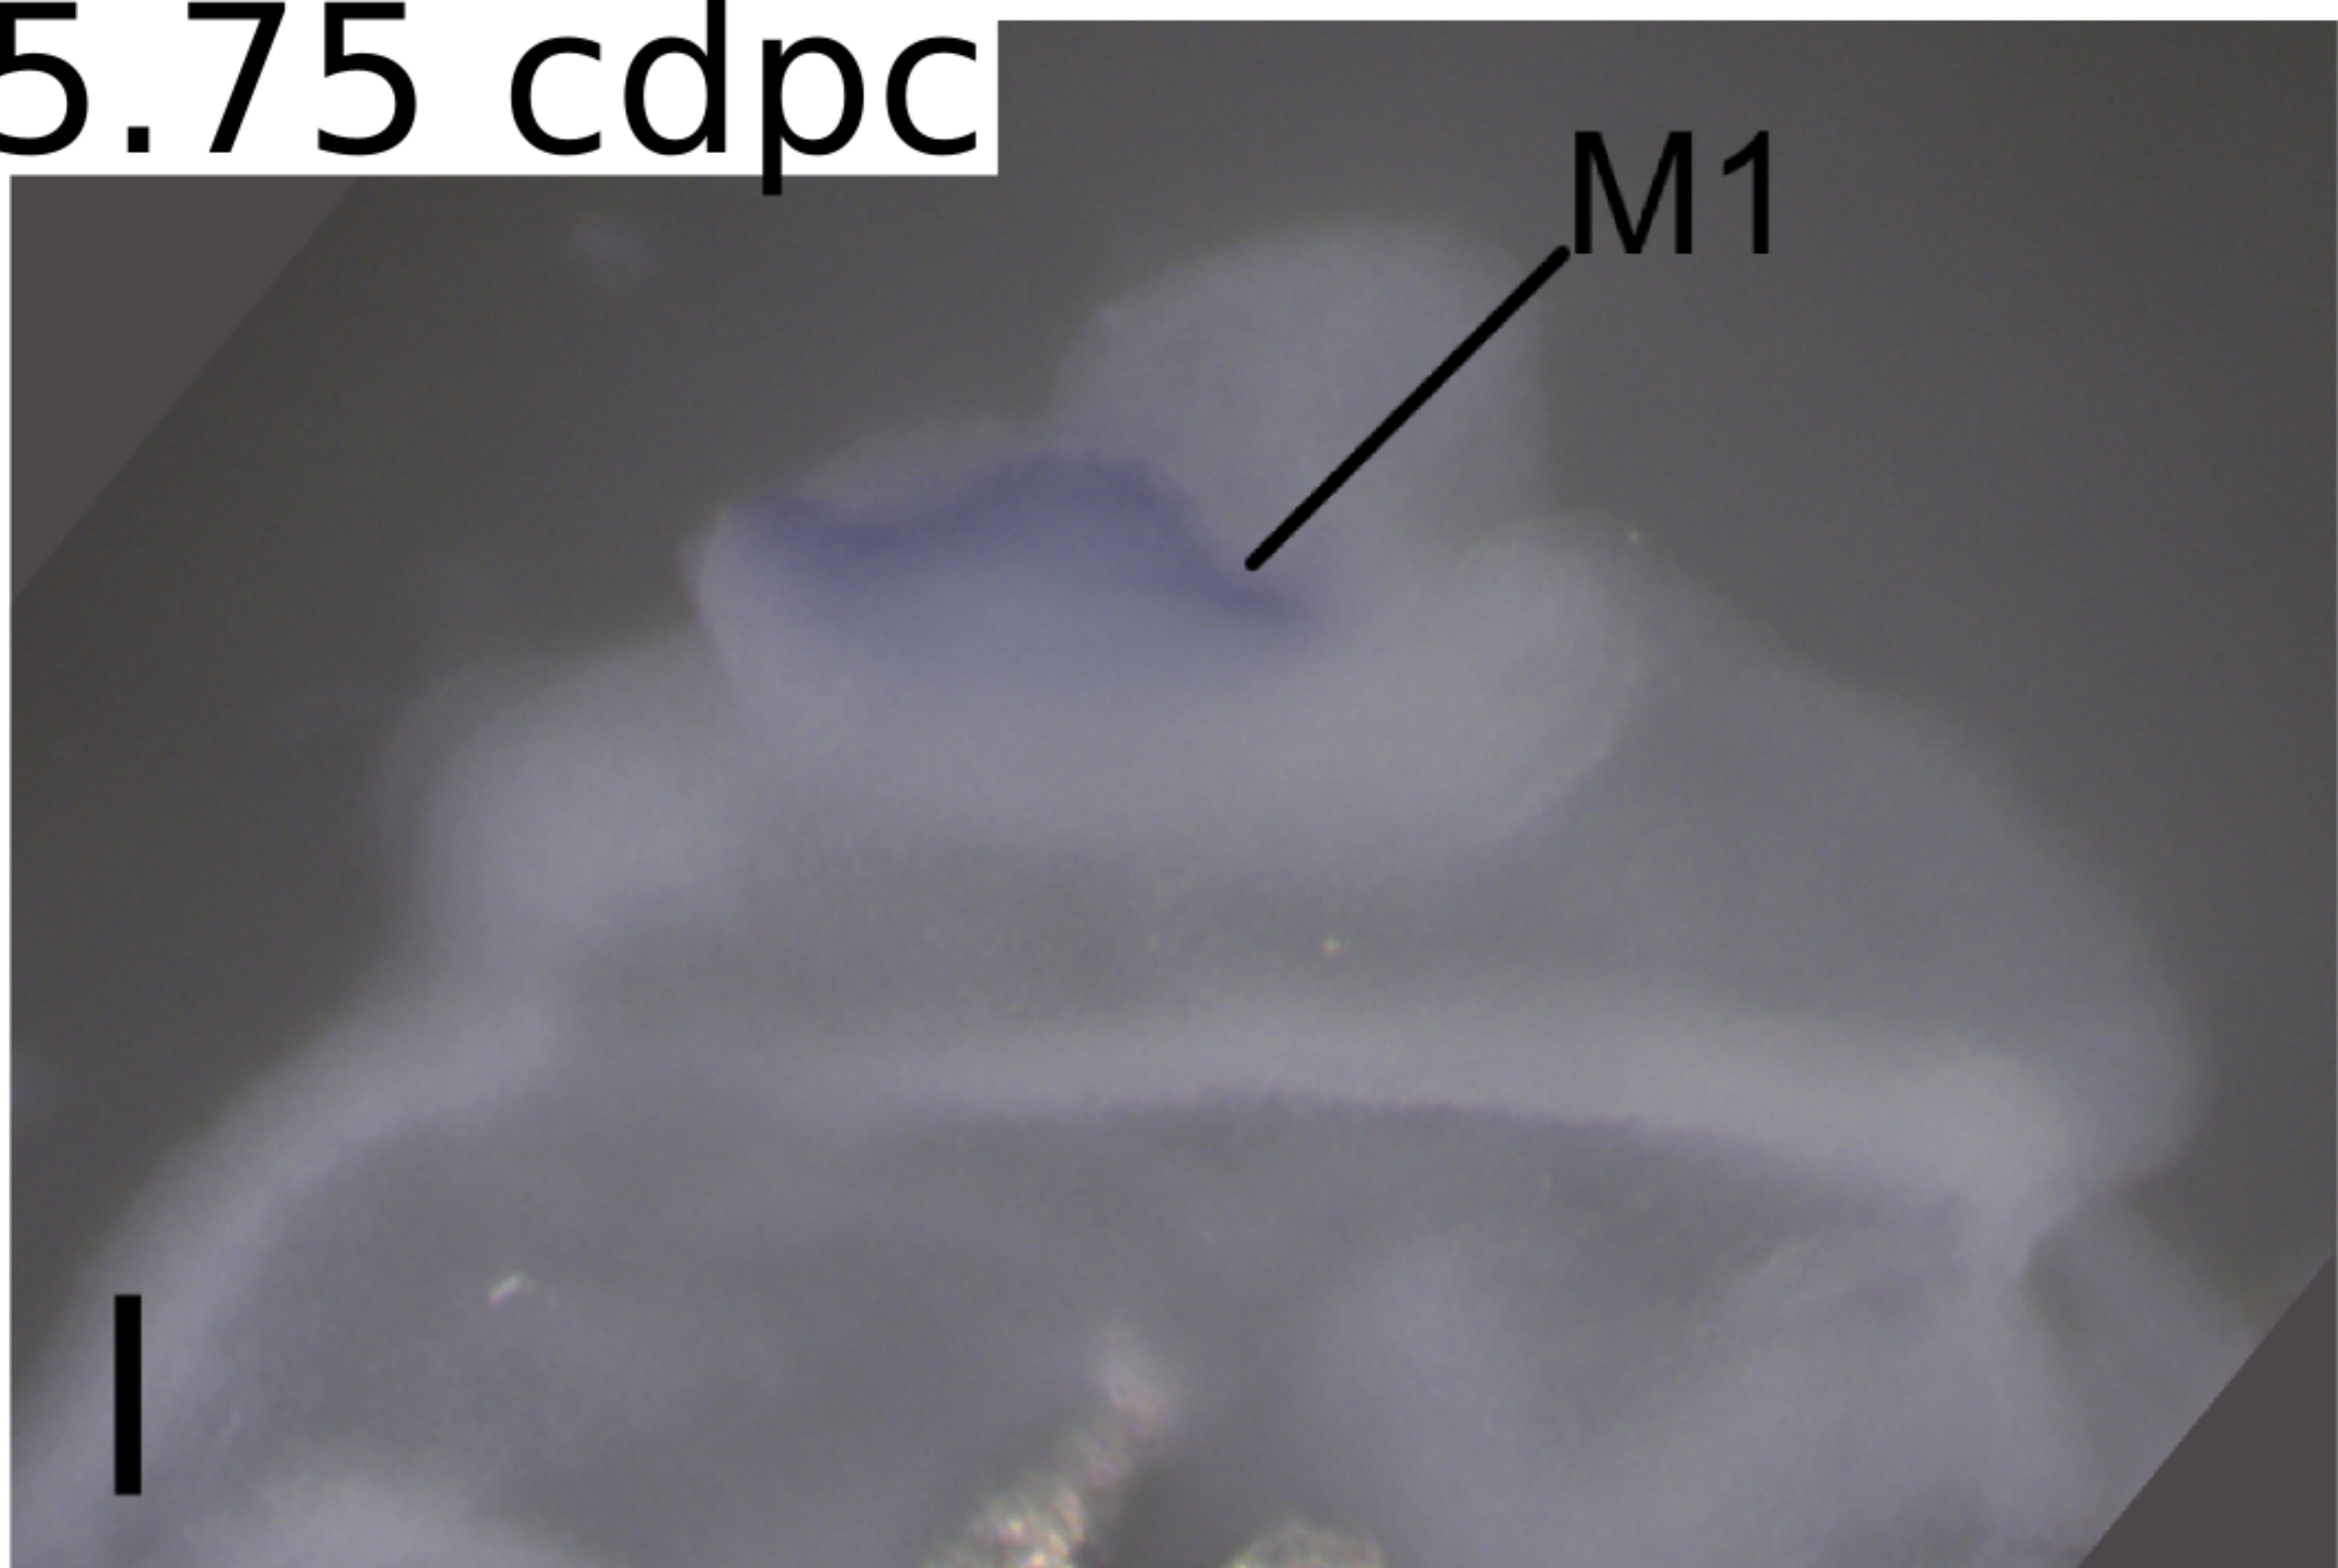

380mg

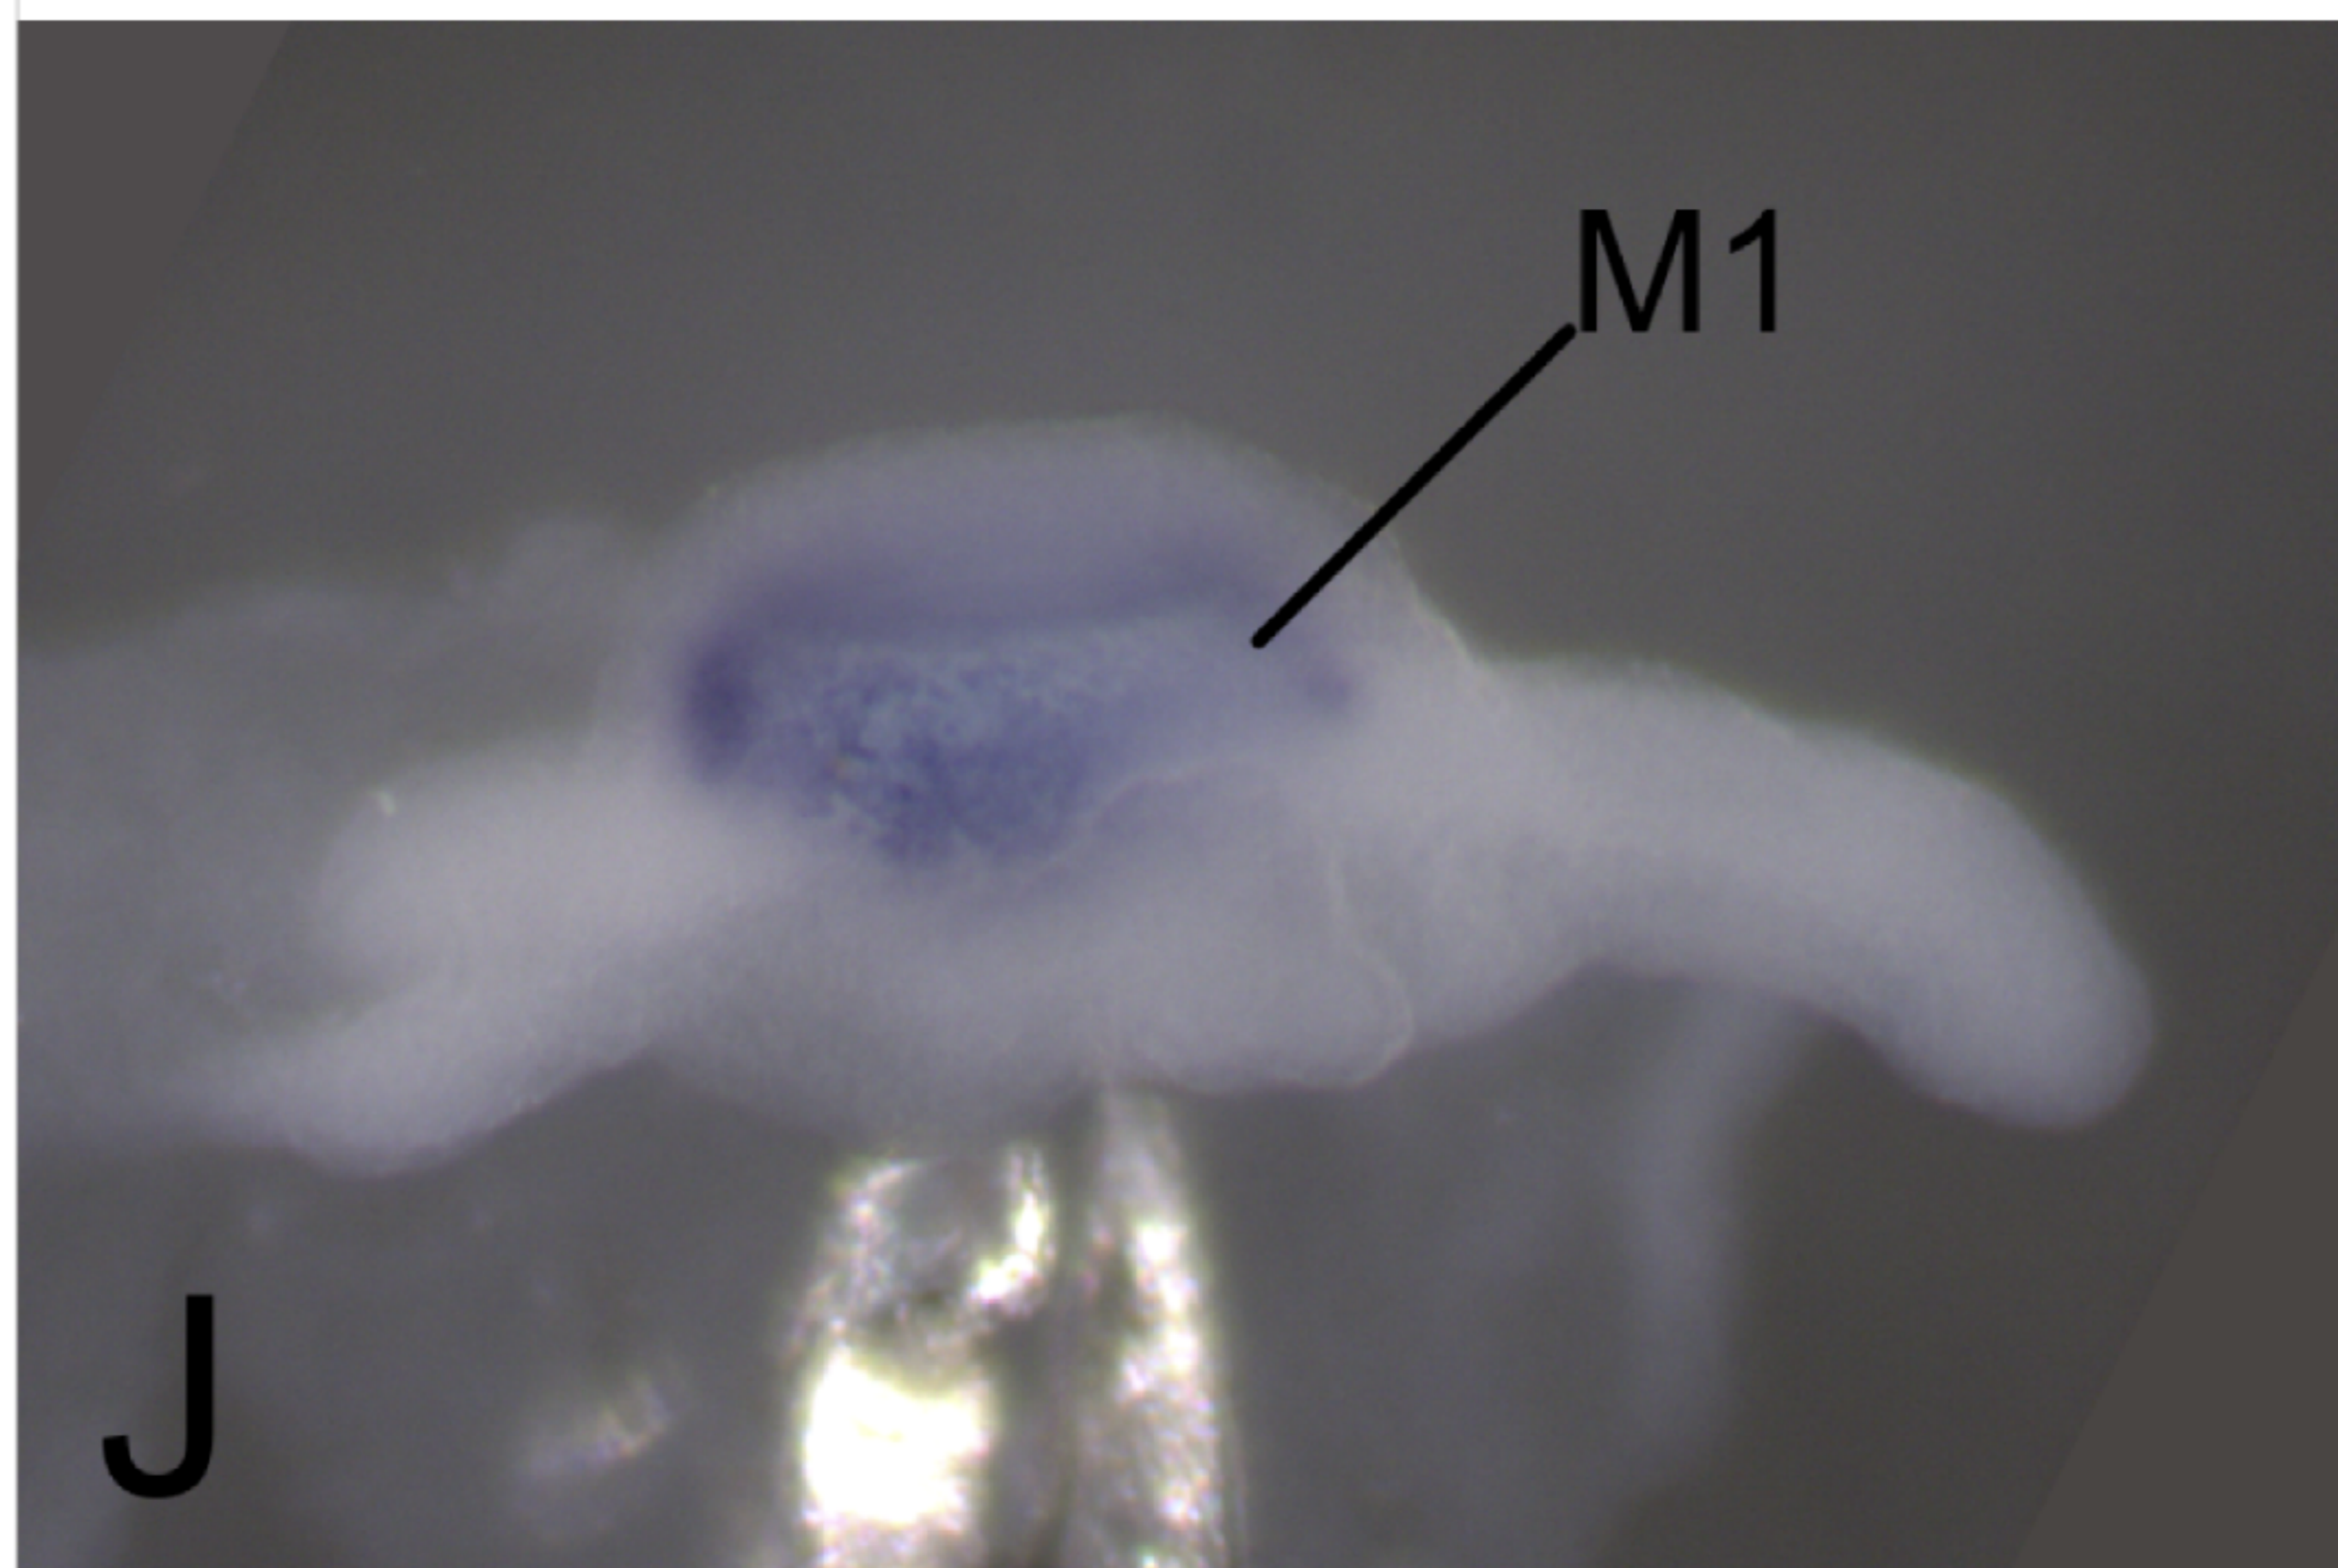

16.0 cdpc

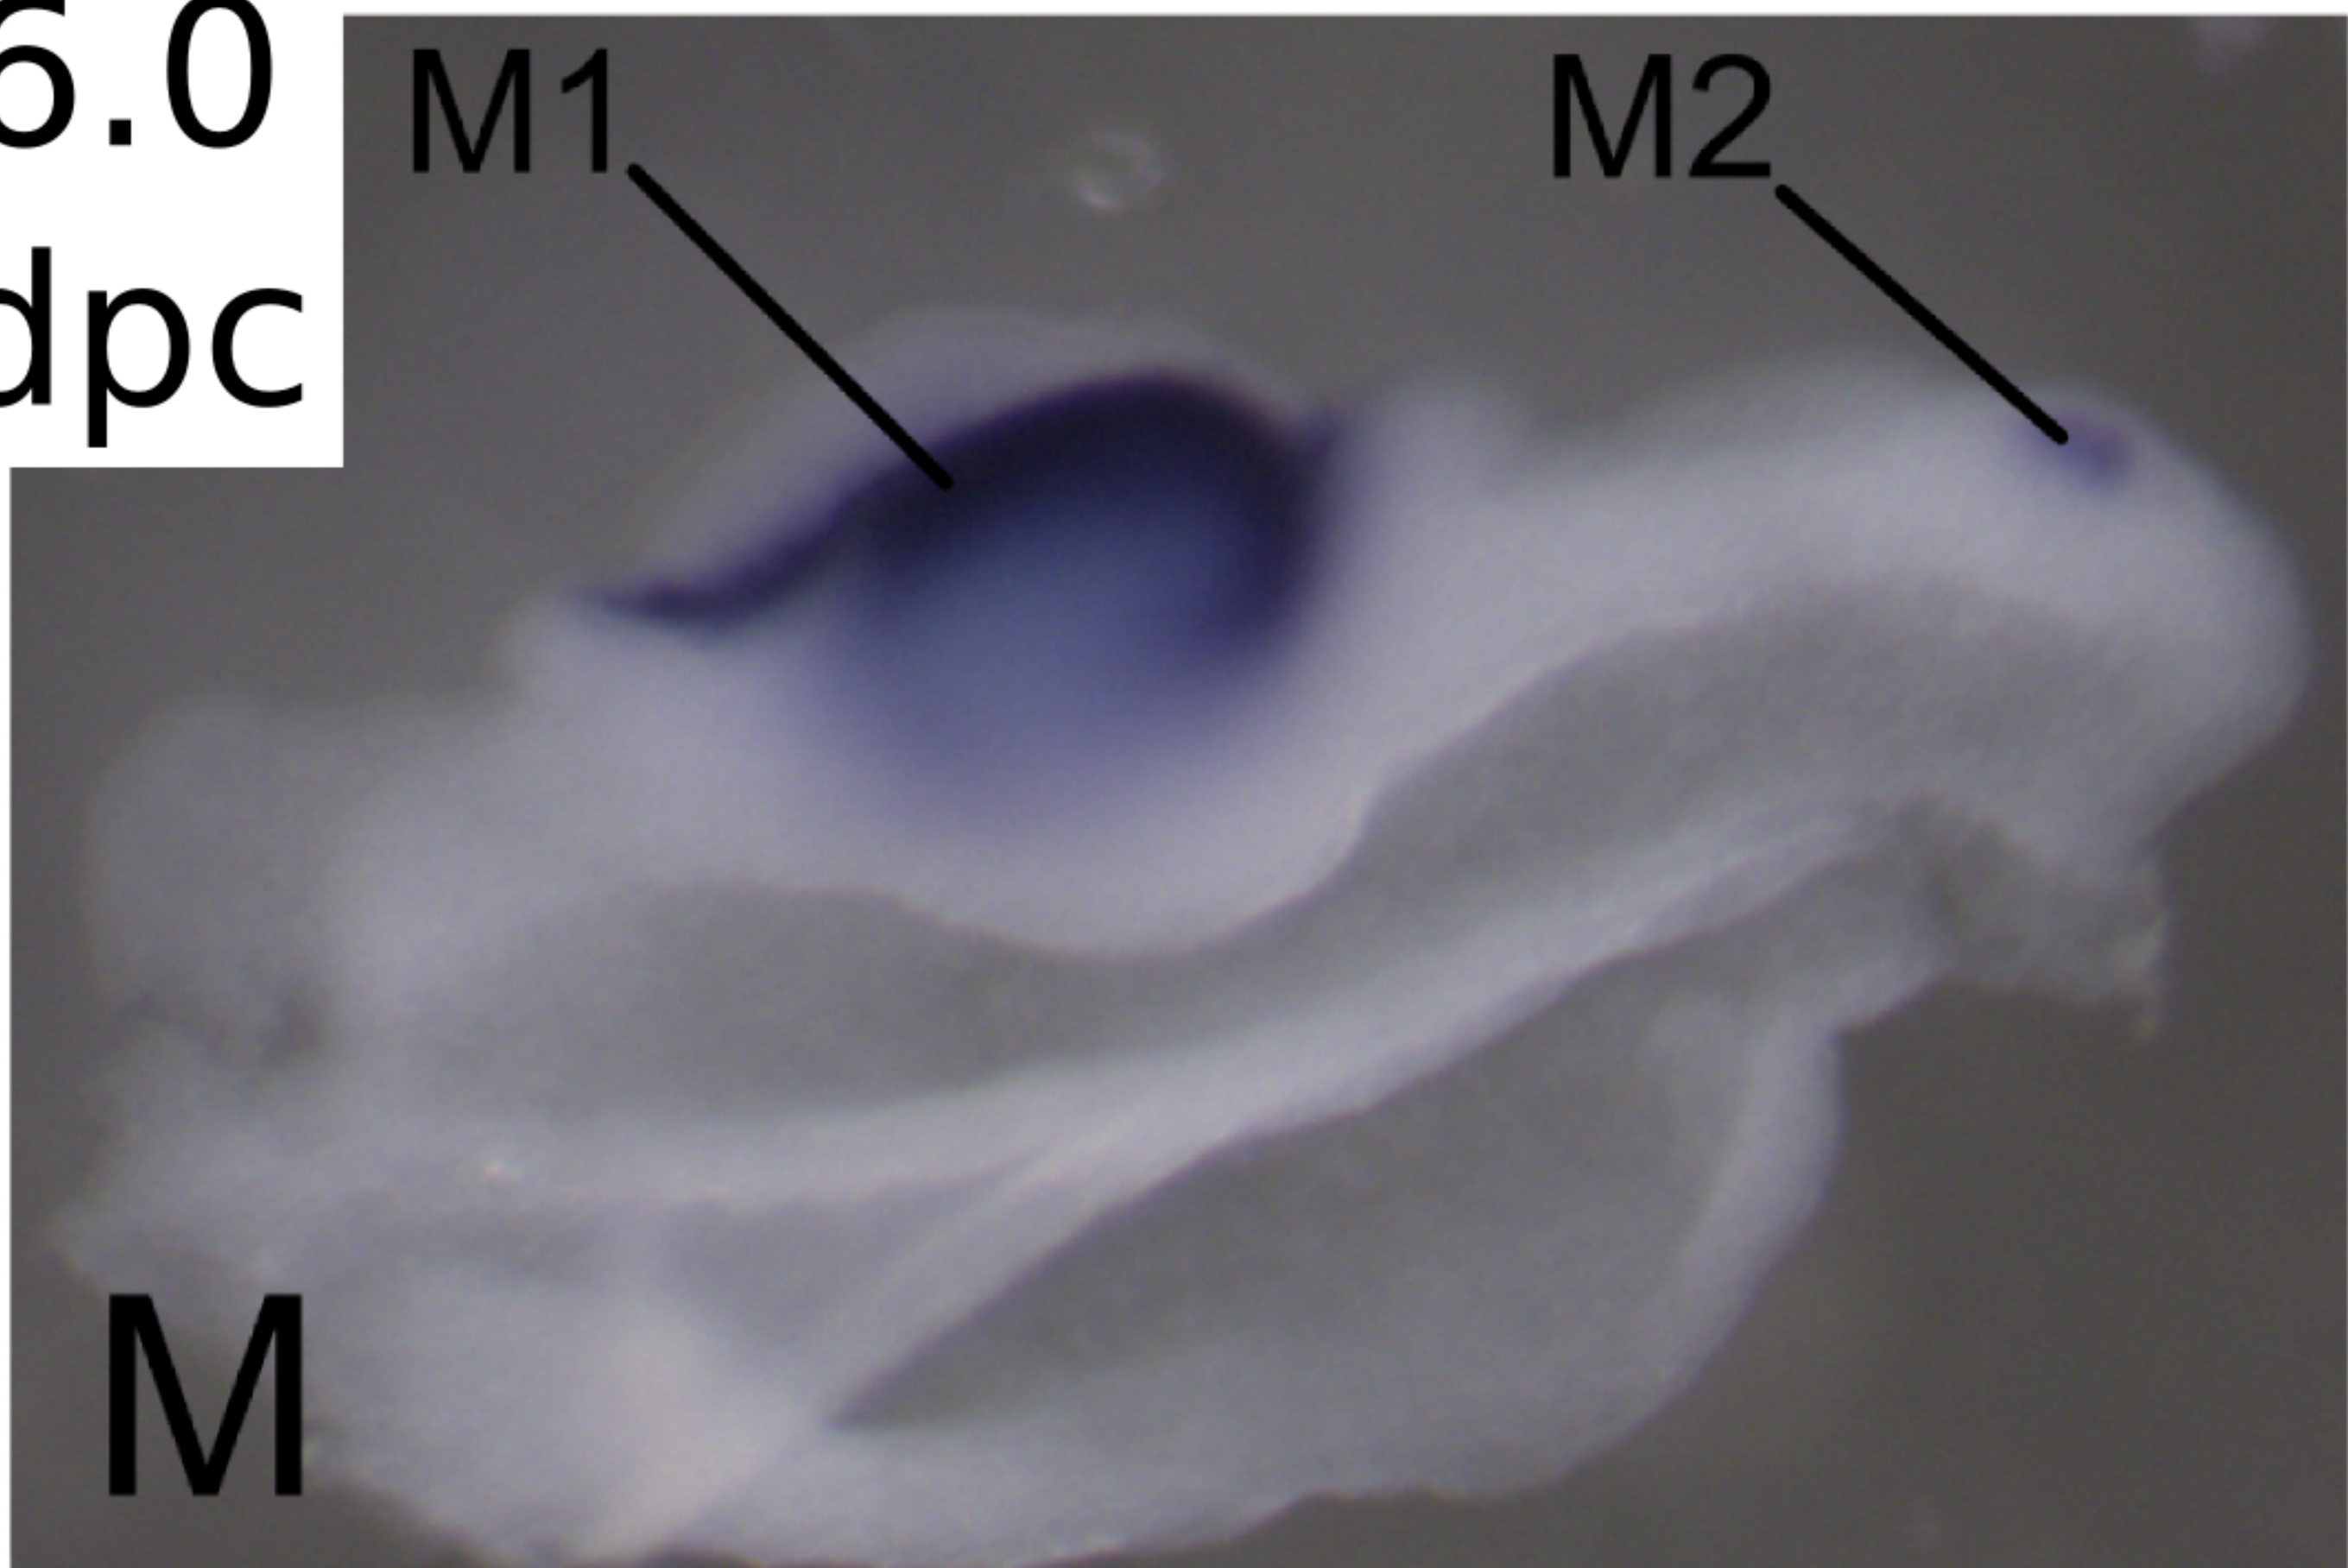

424mg

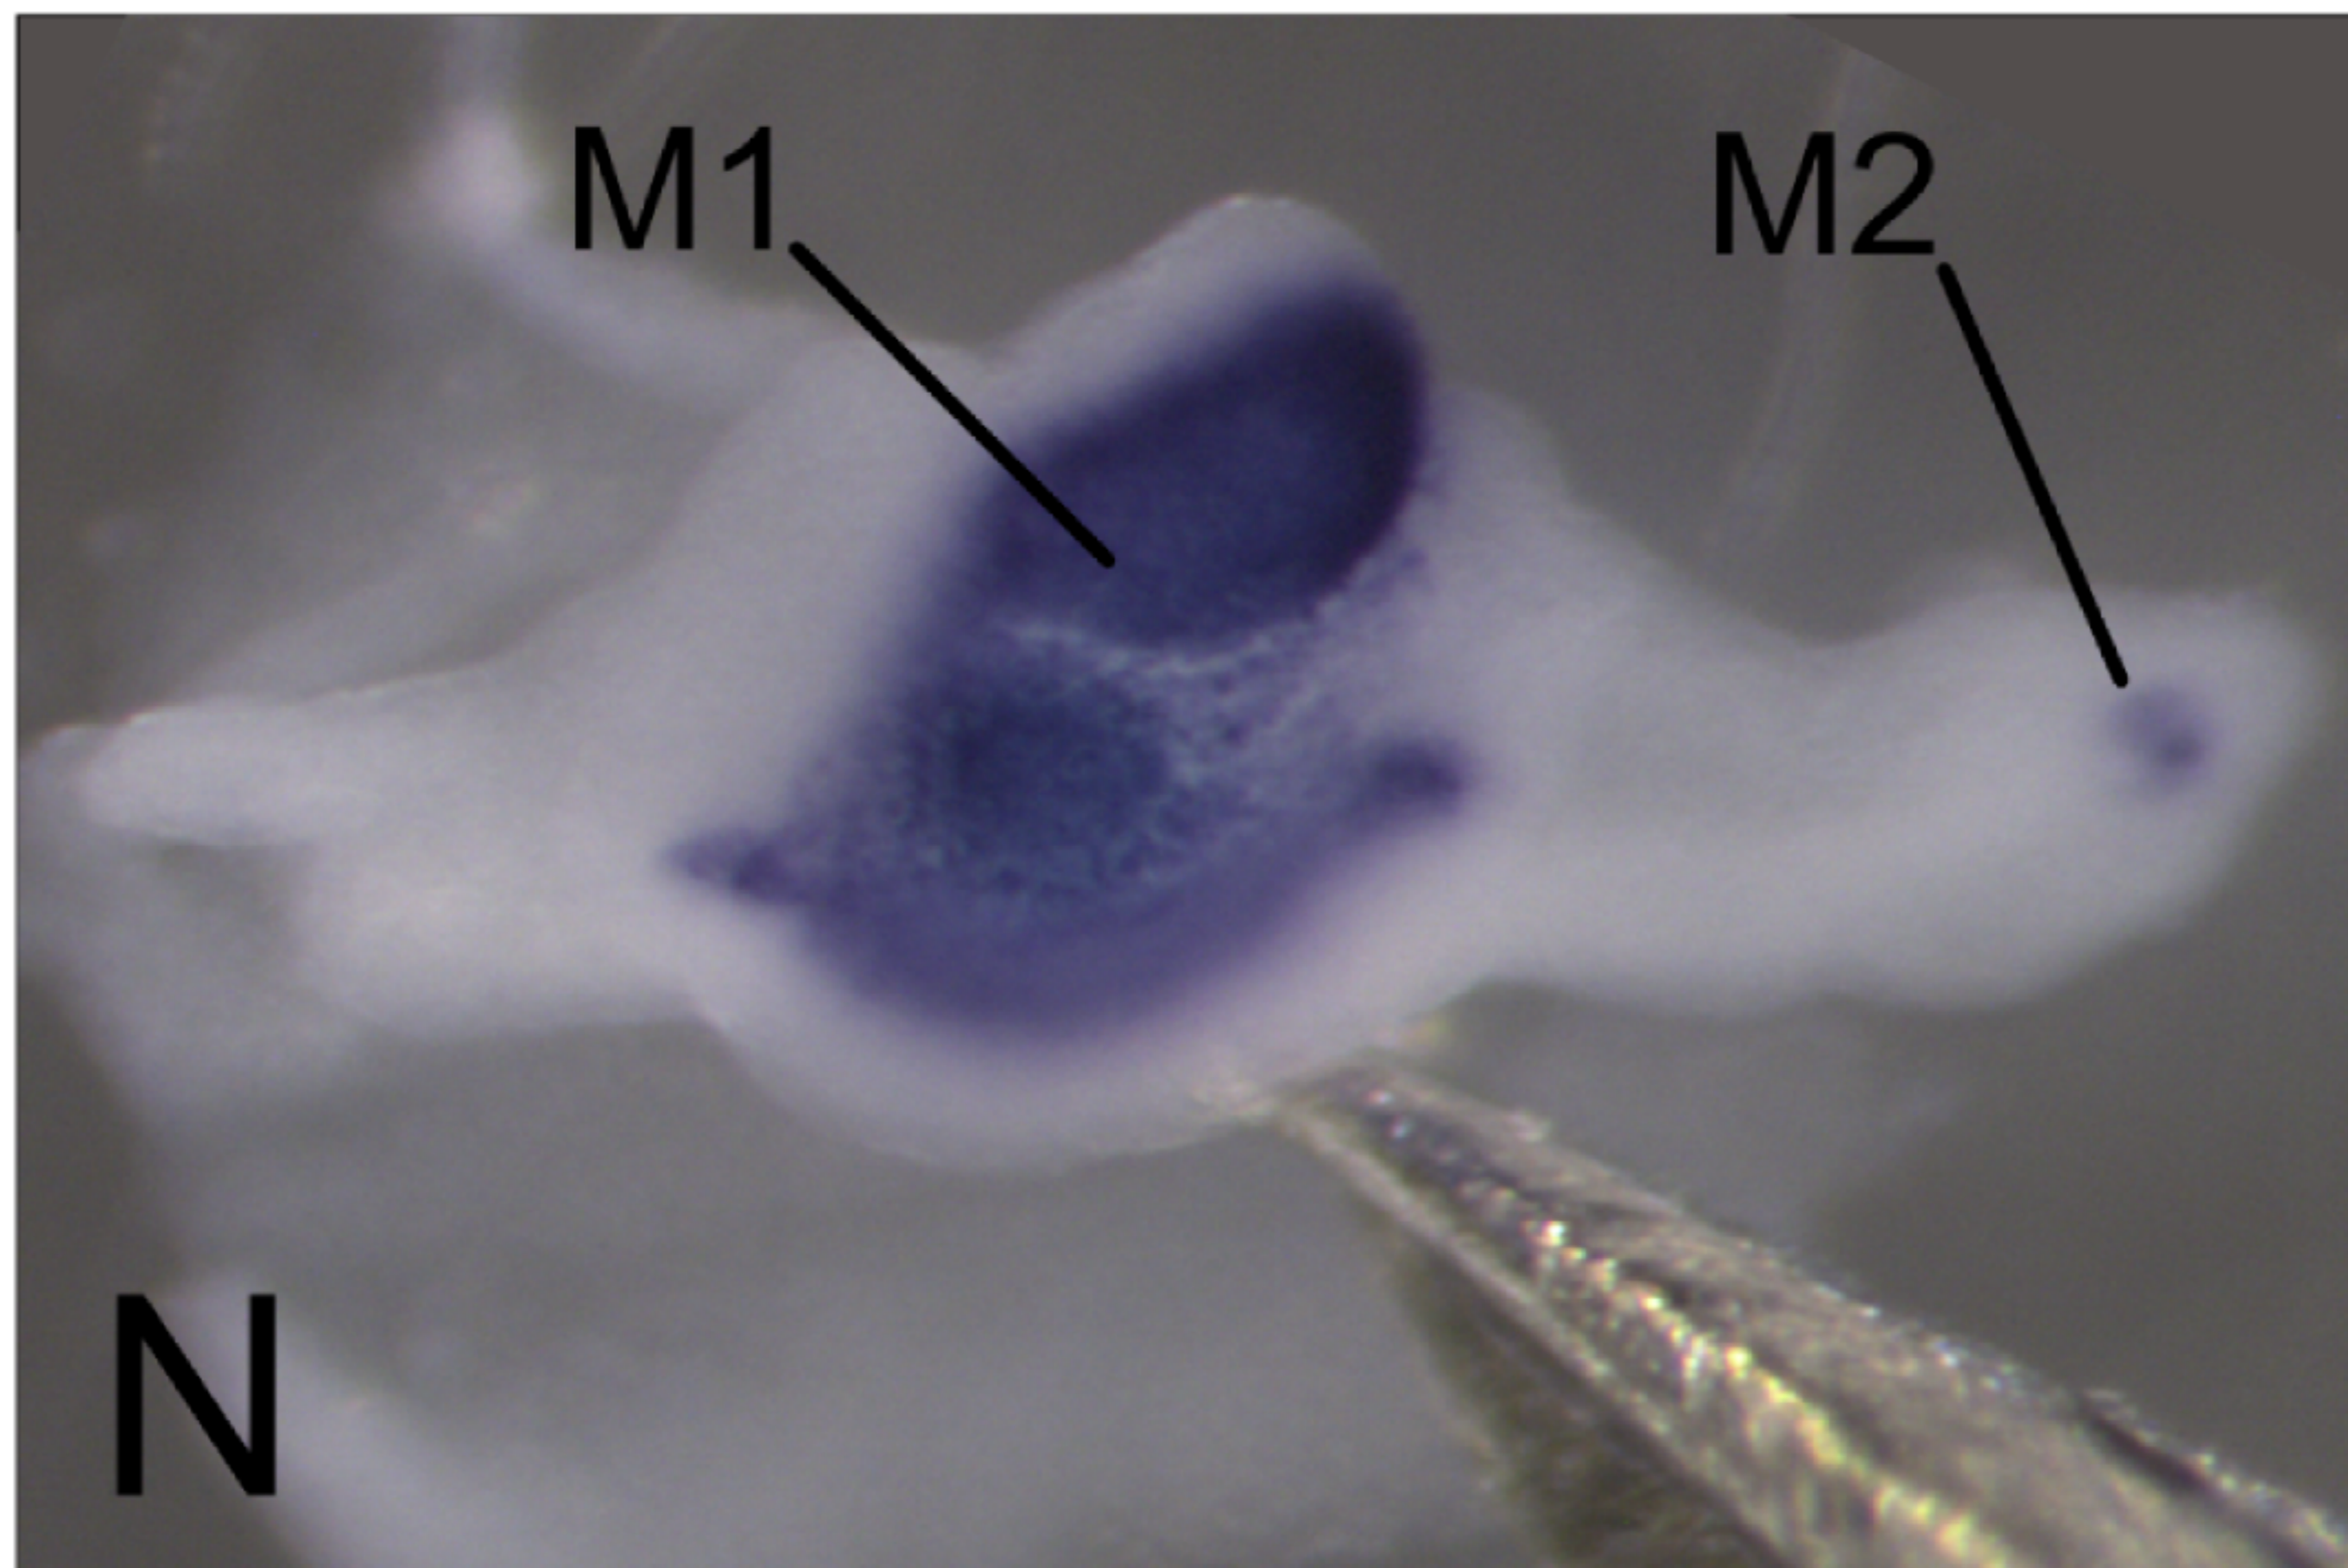

FVB upper molars

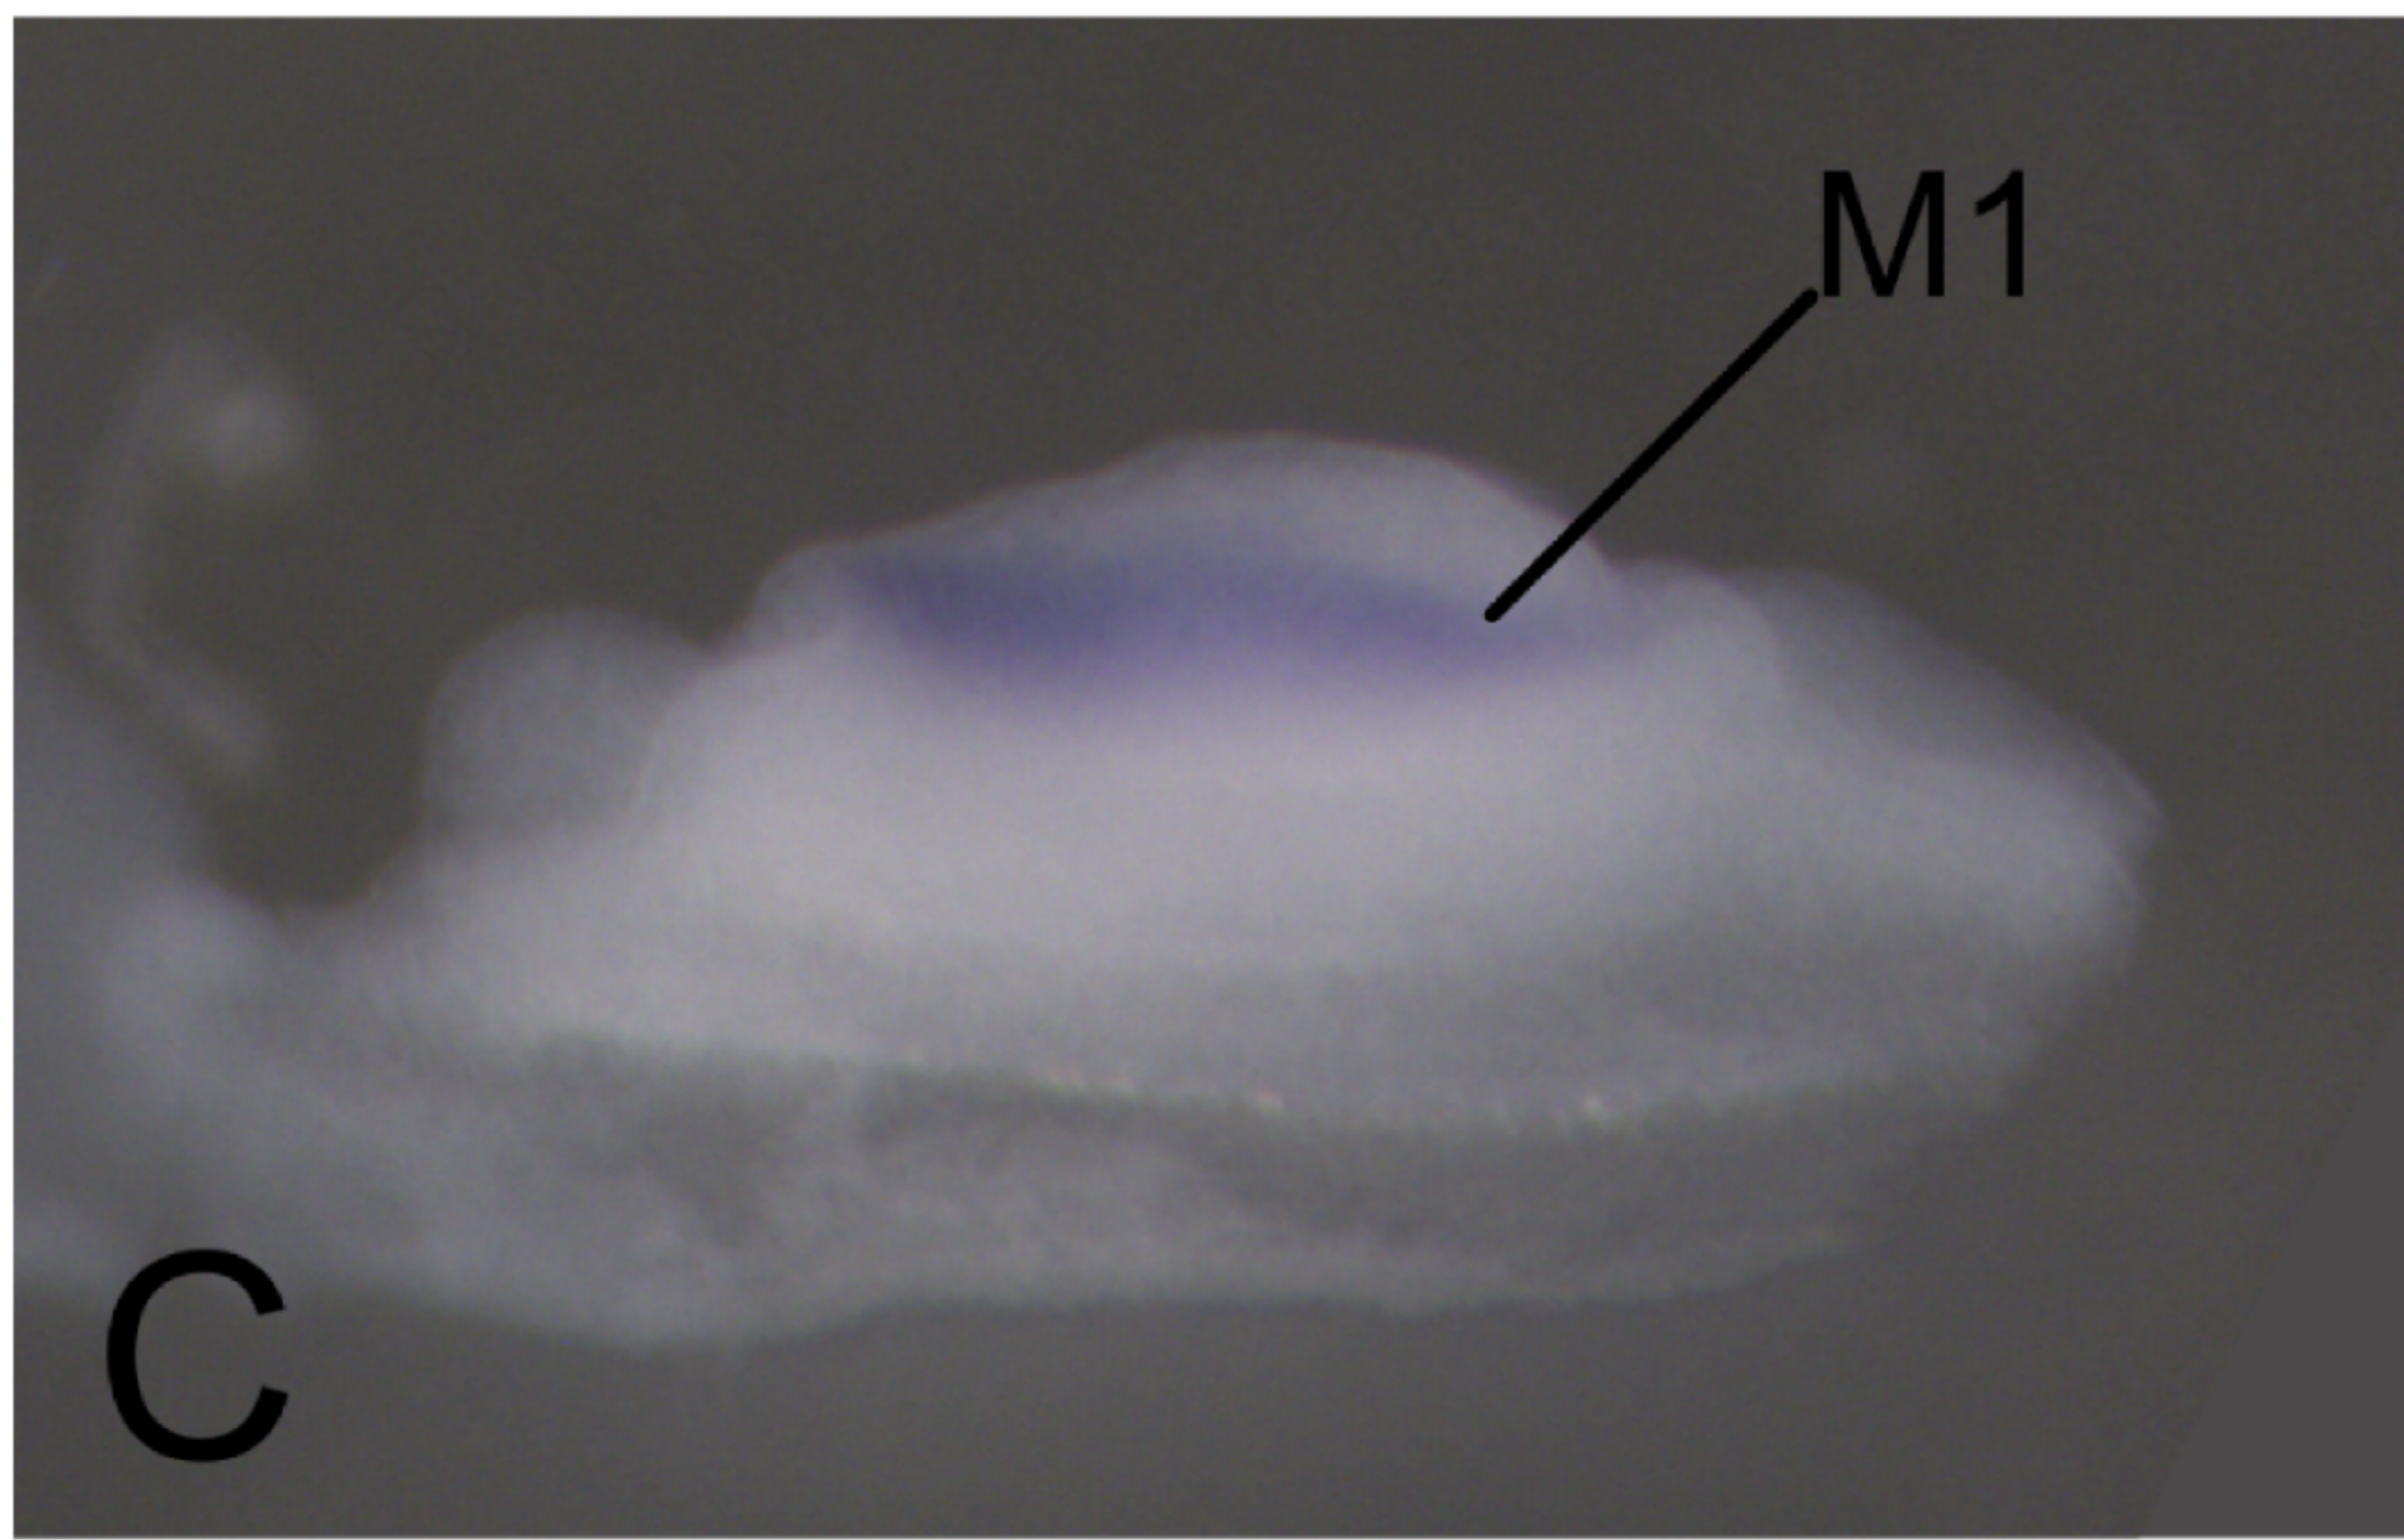

285mg

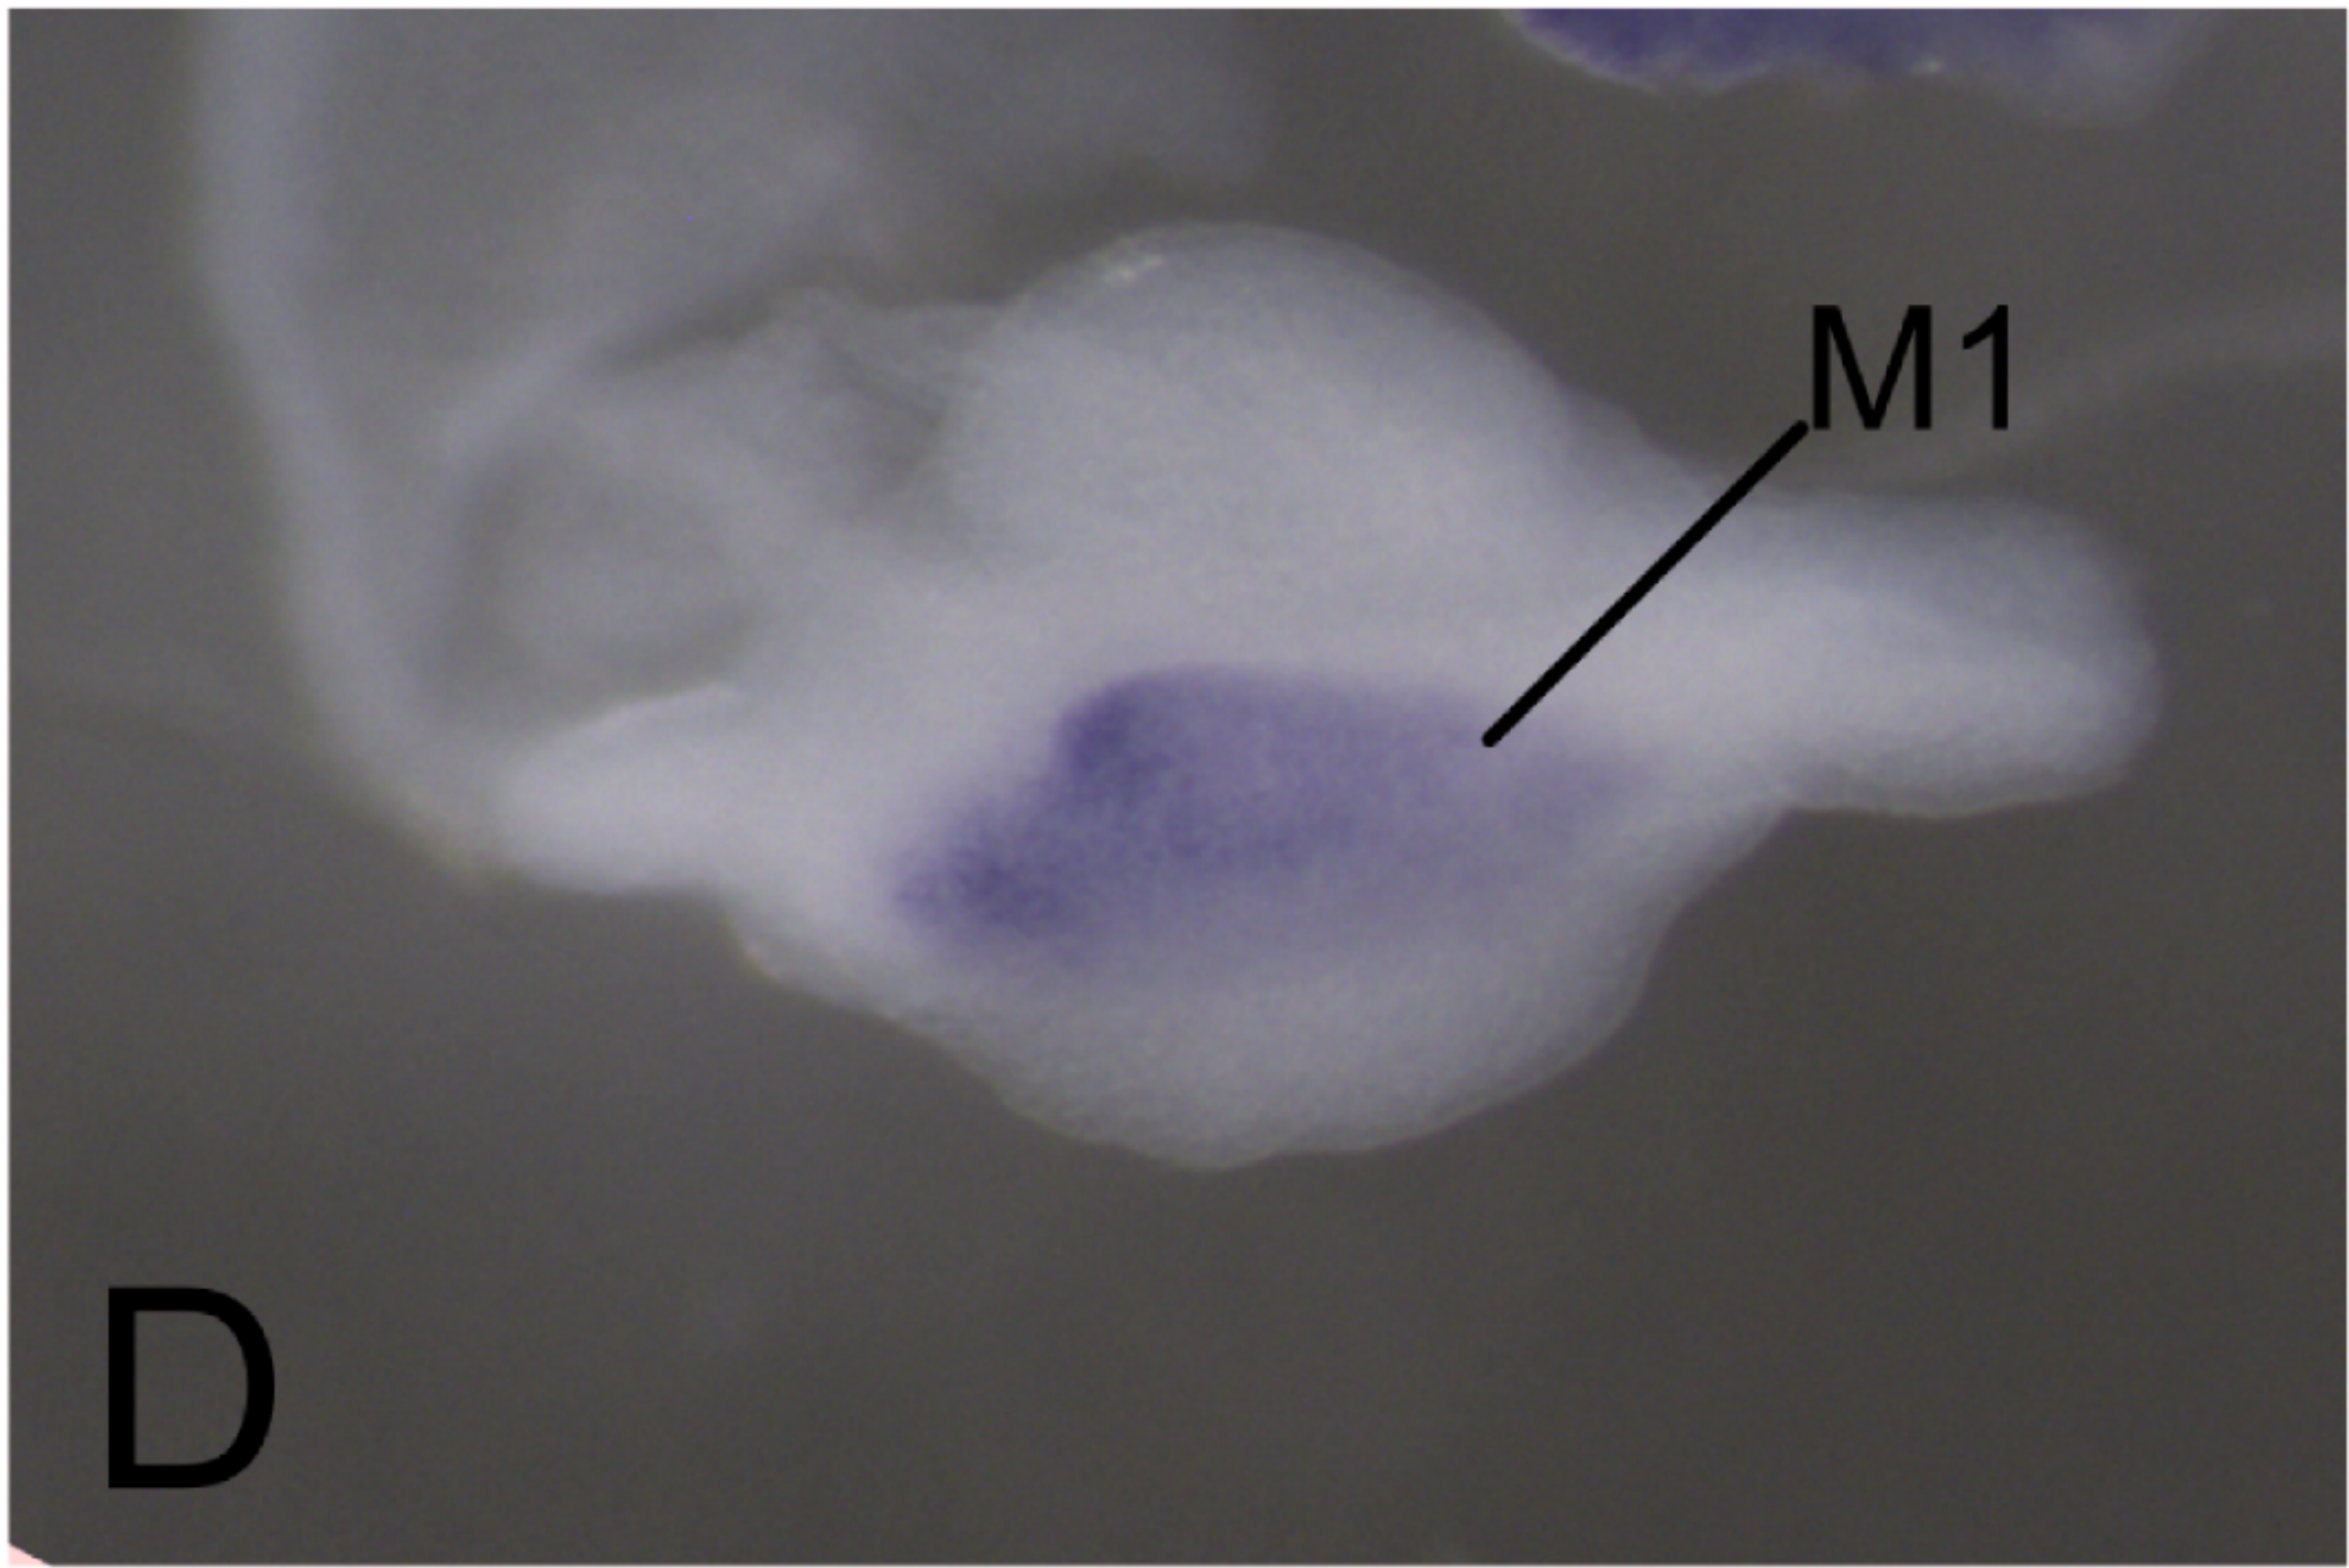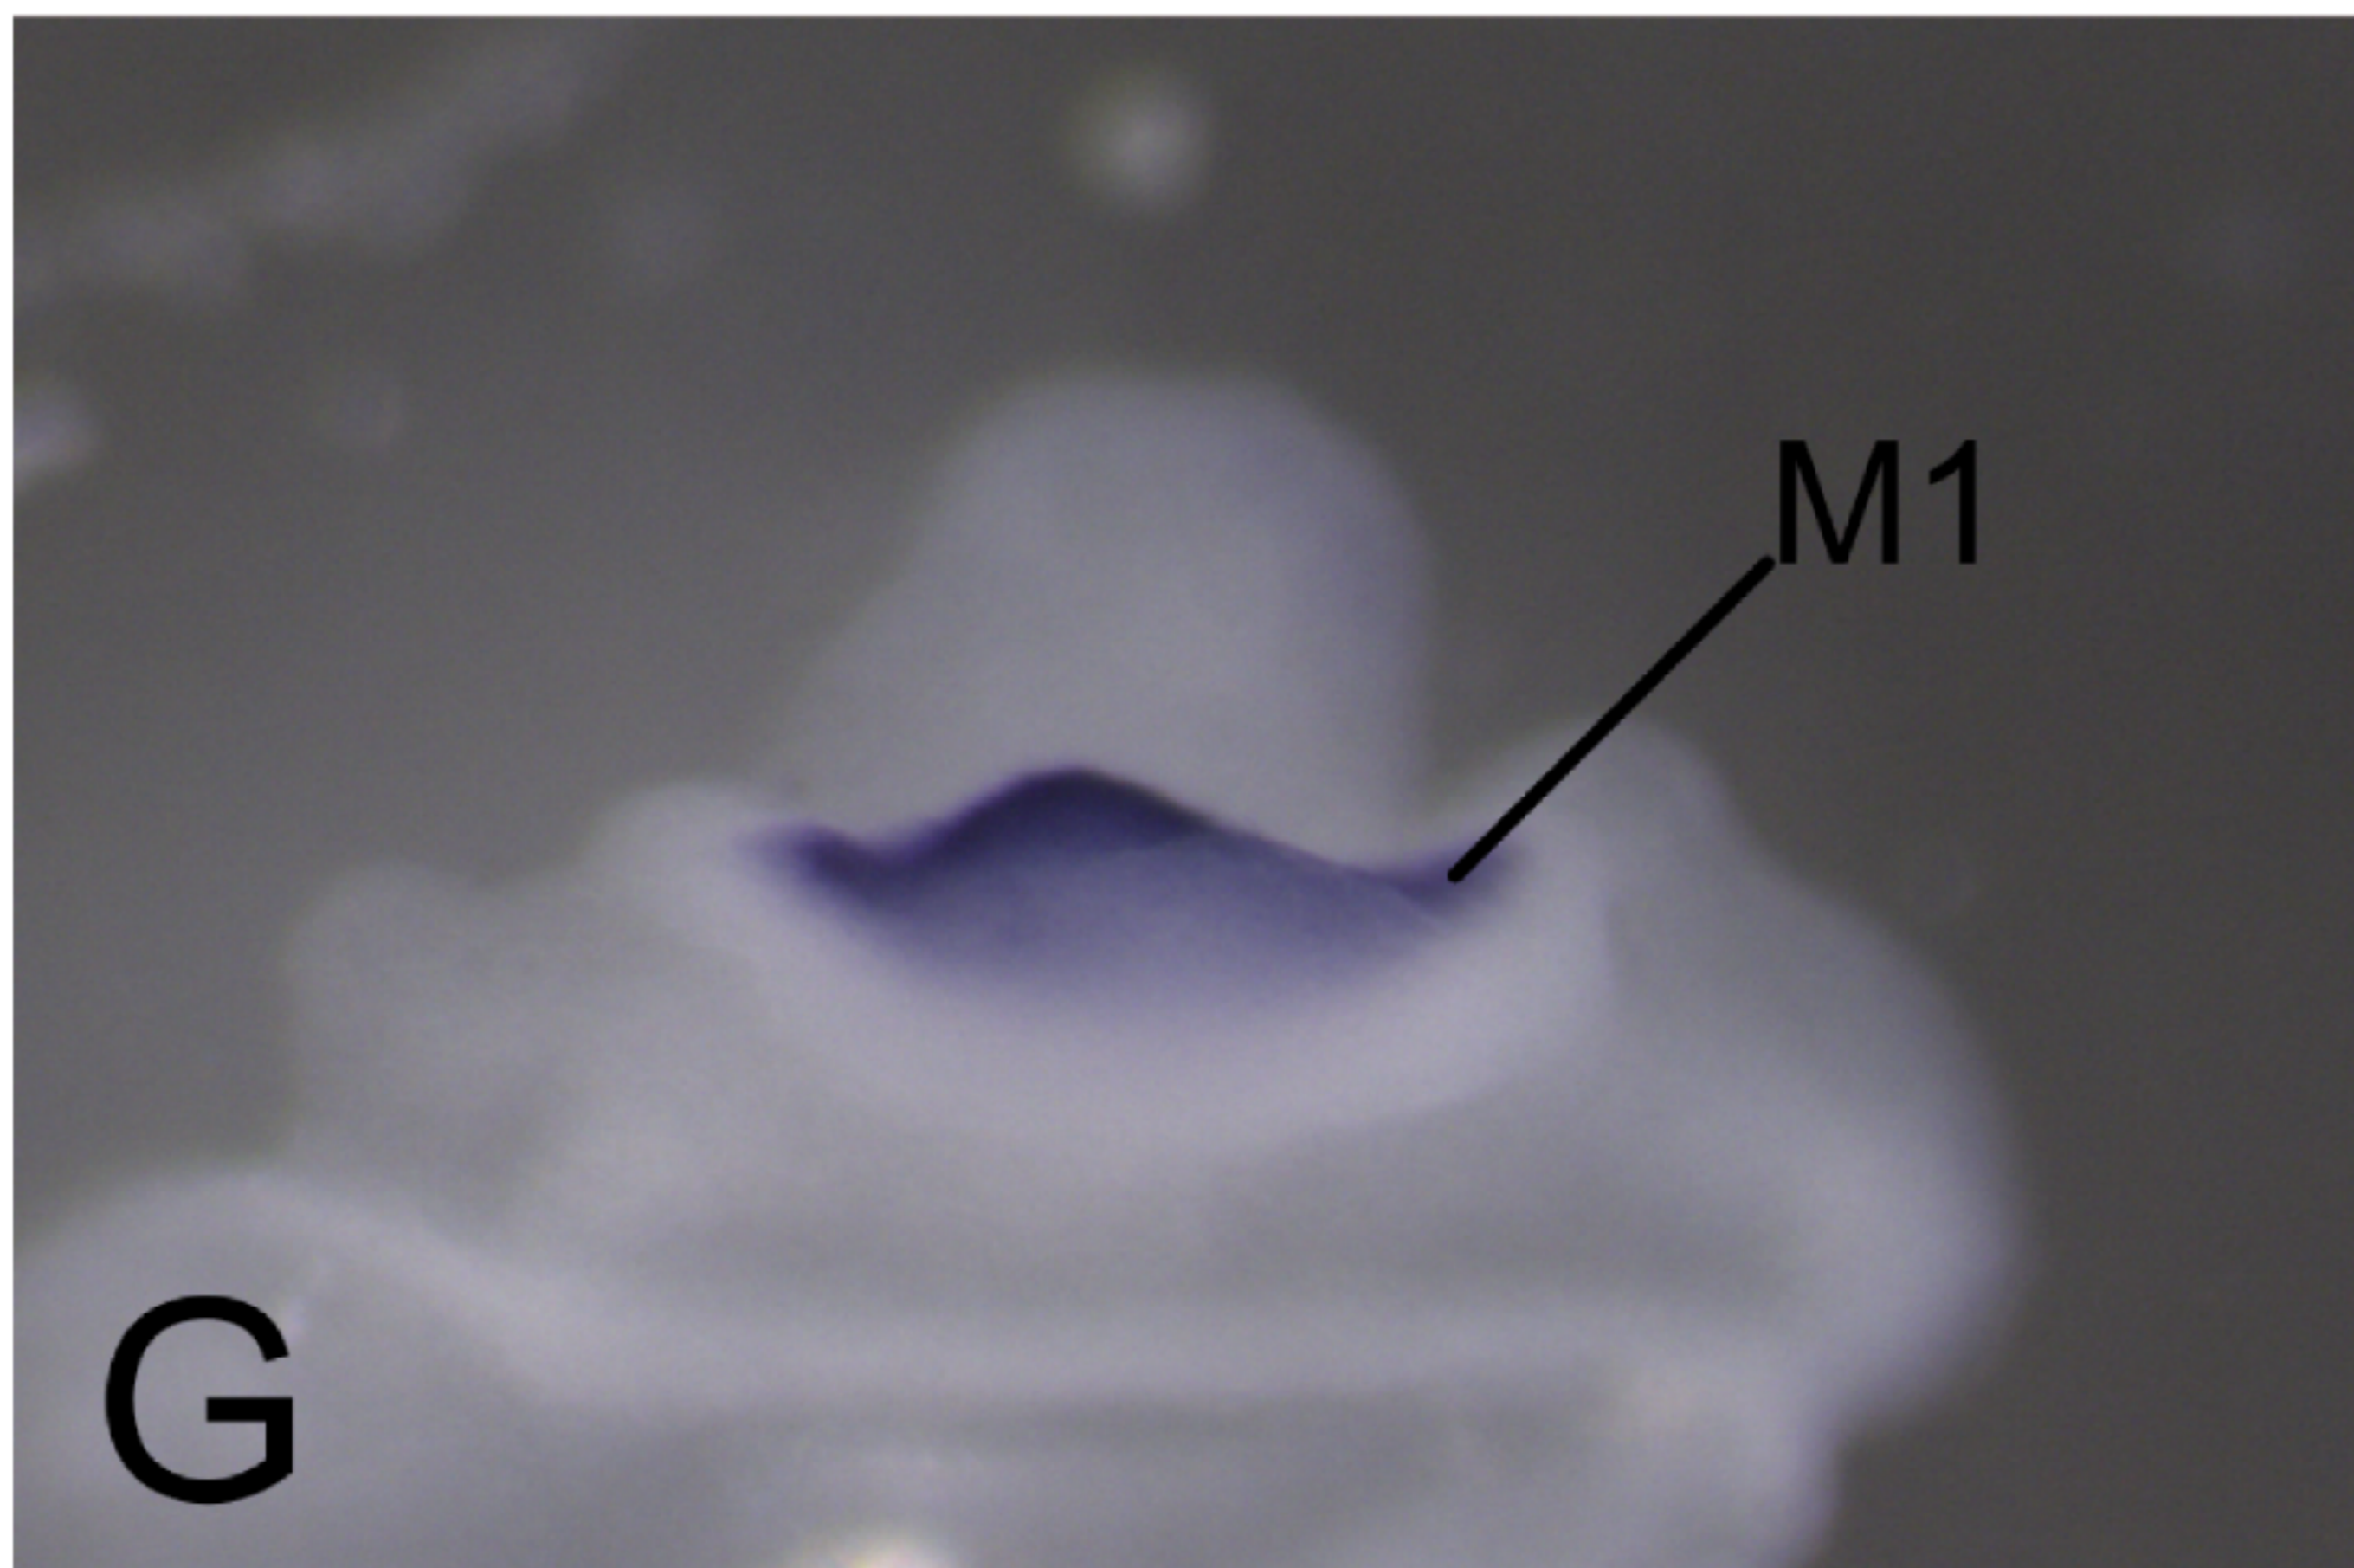

348mg

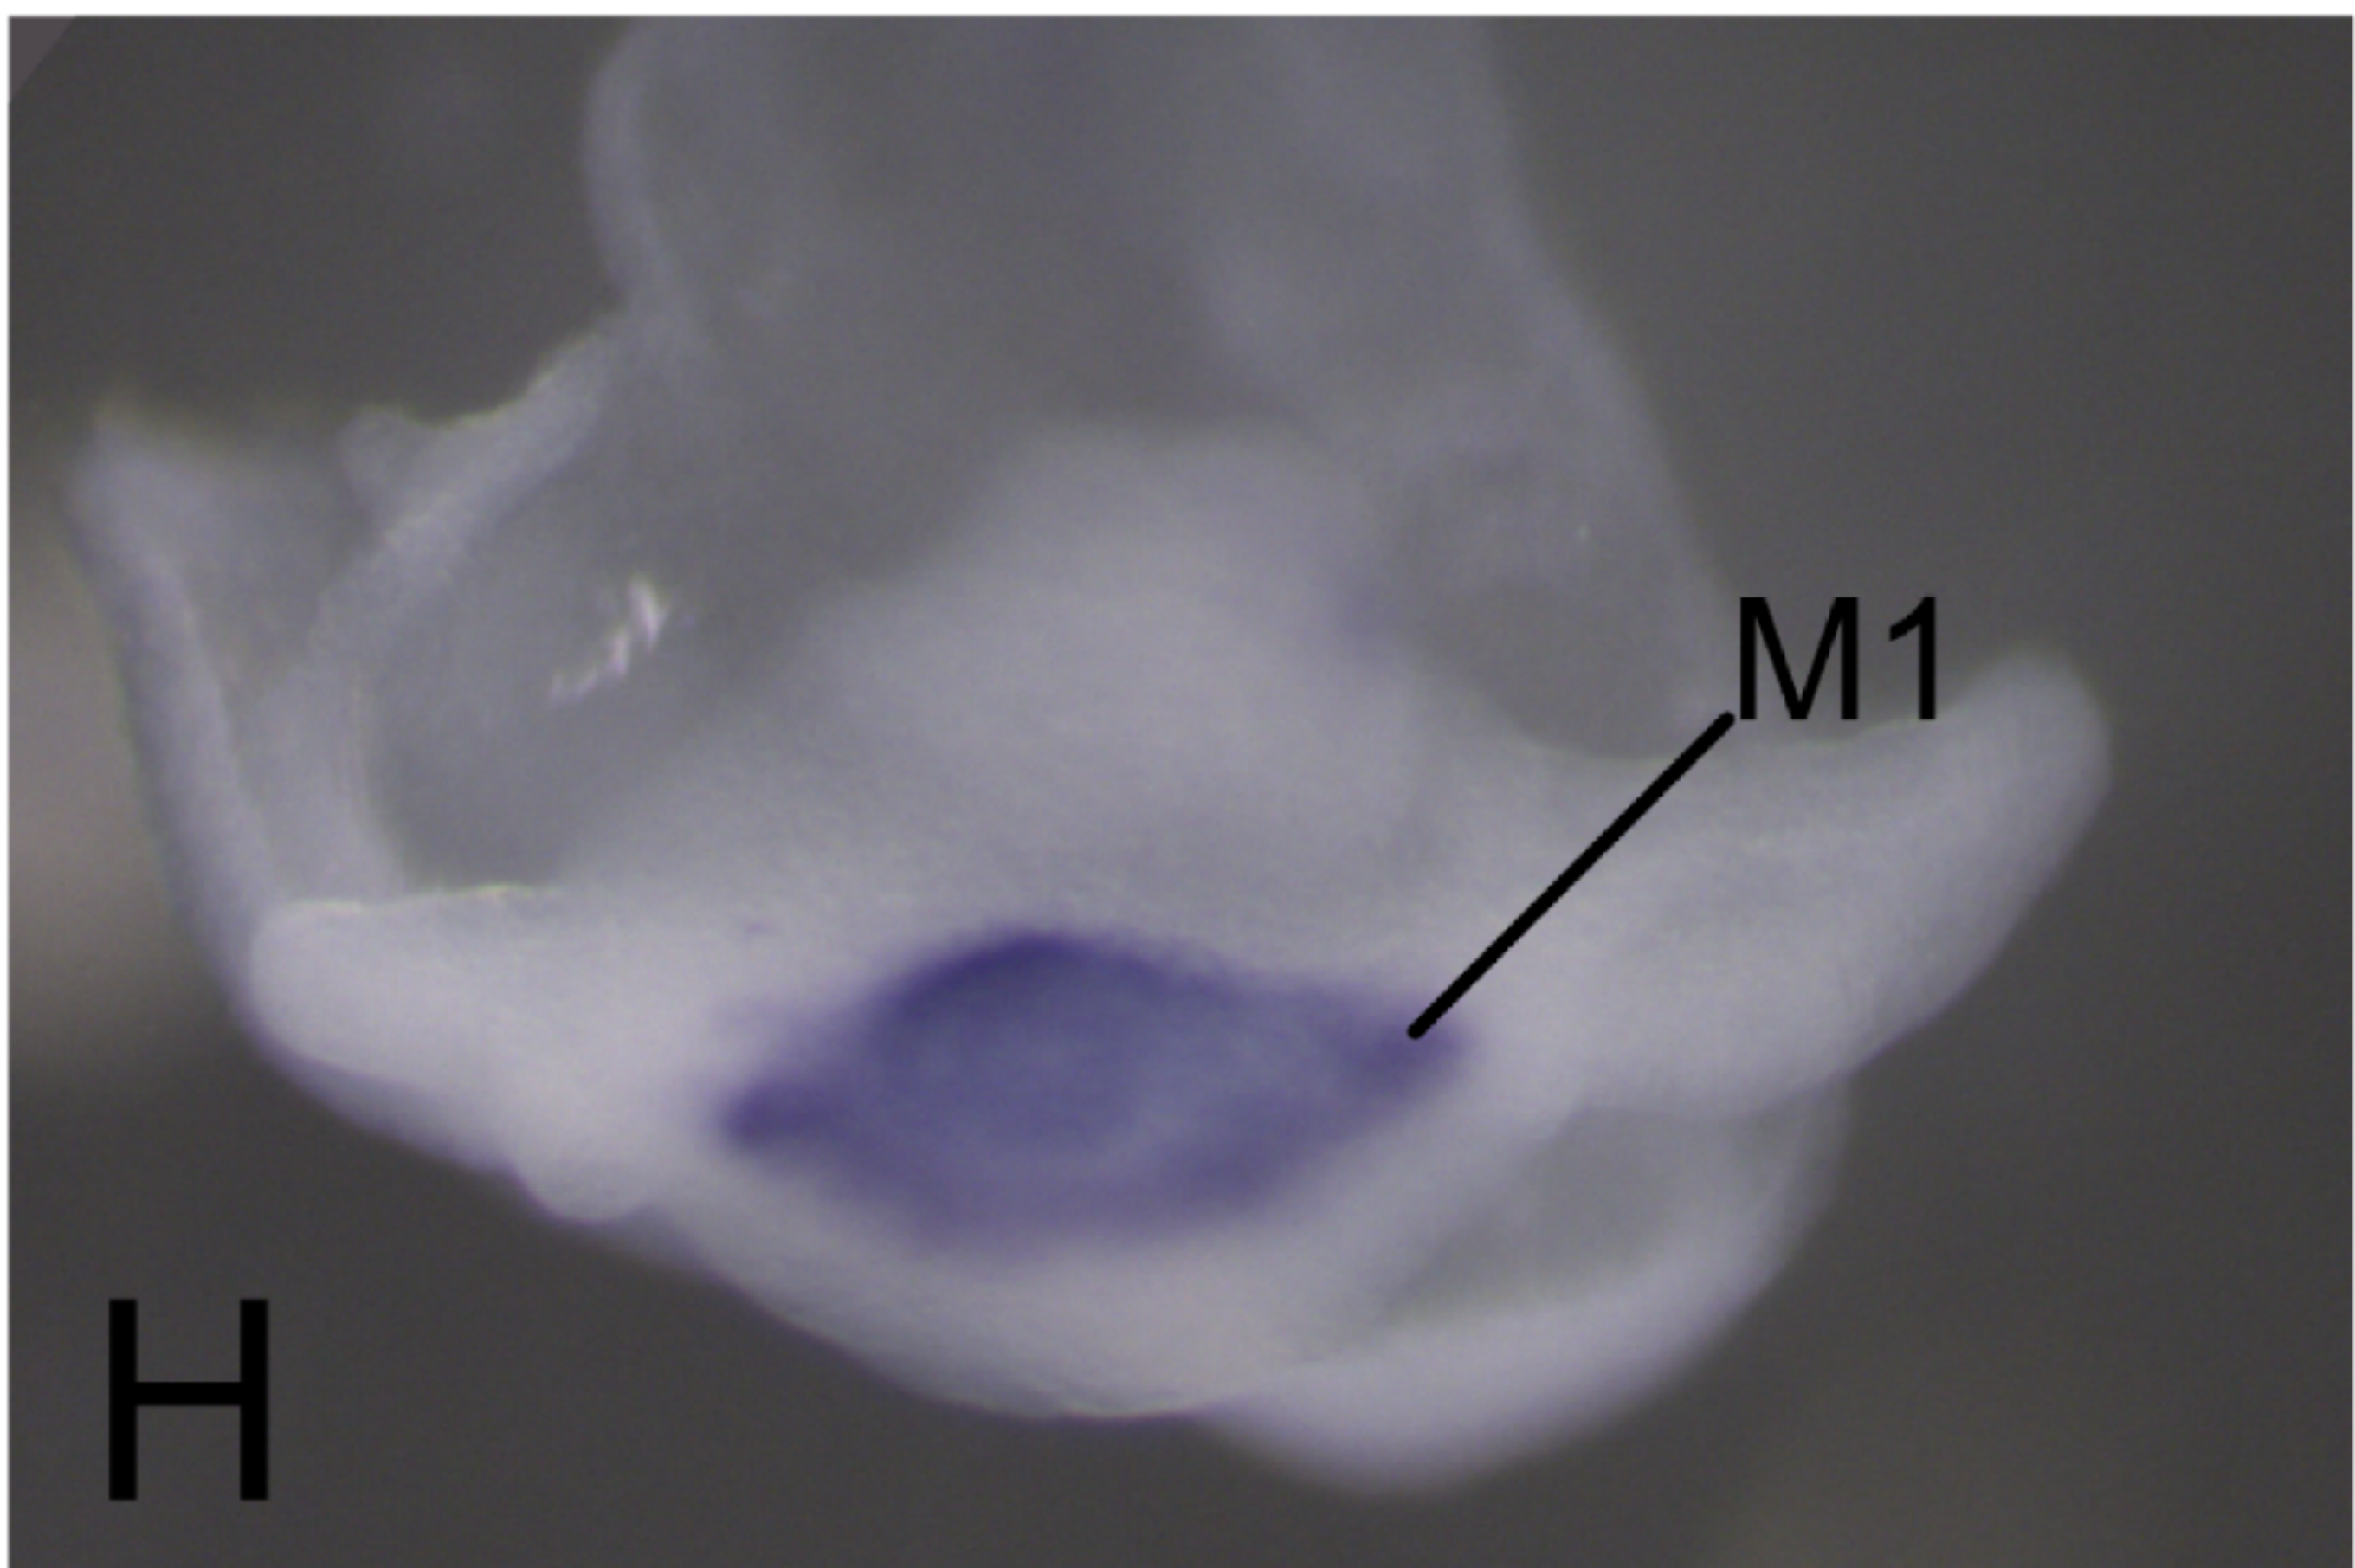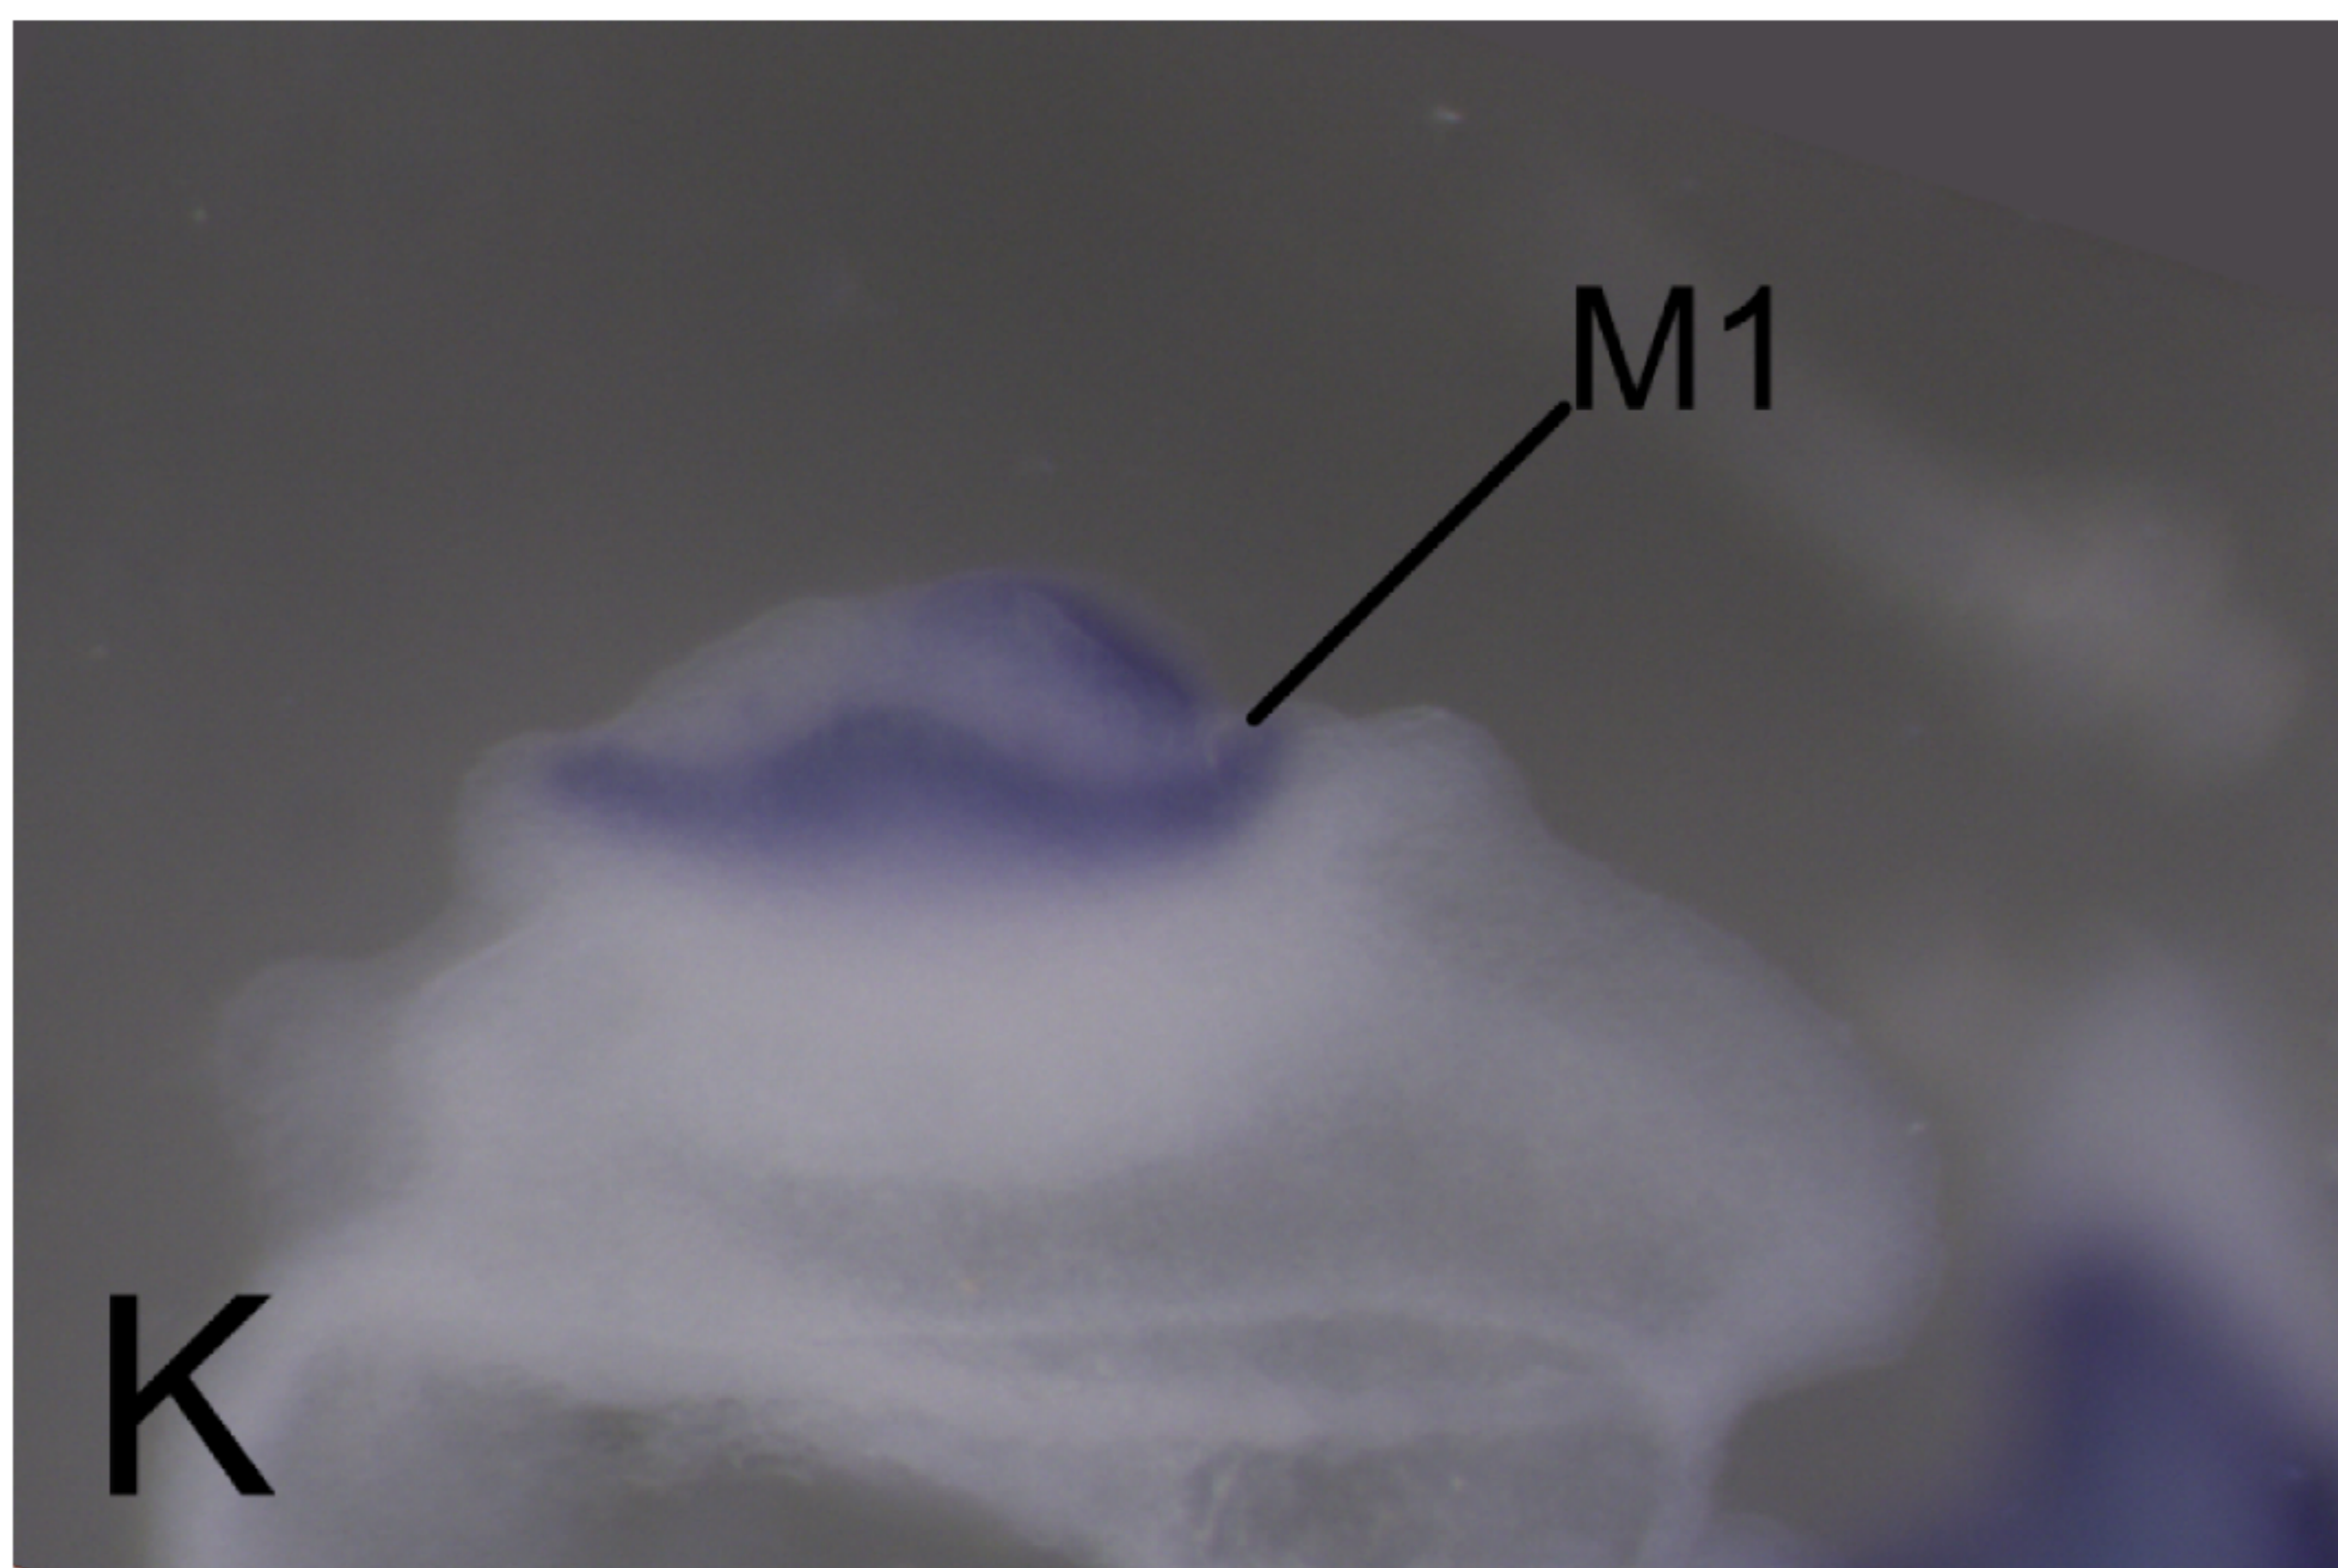

373mg

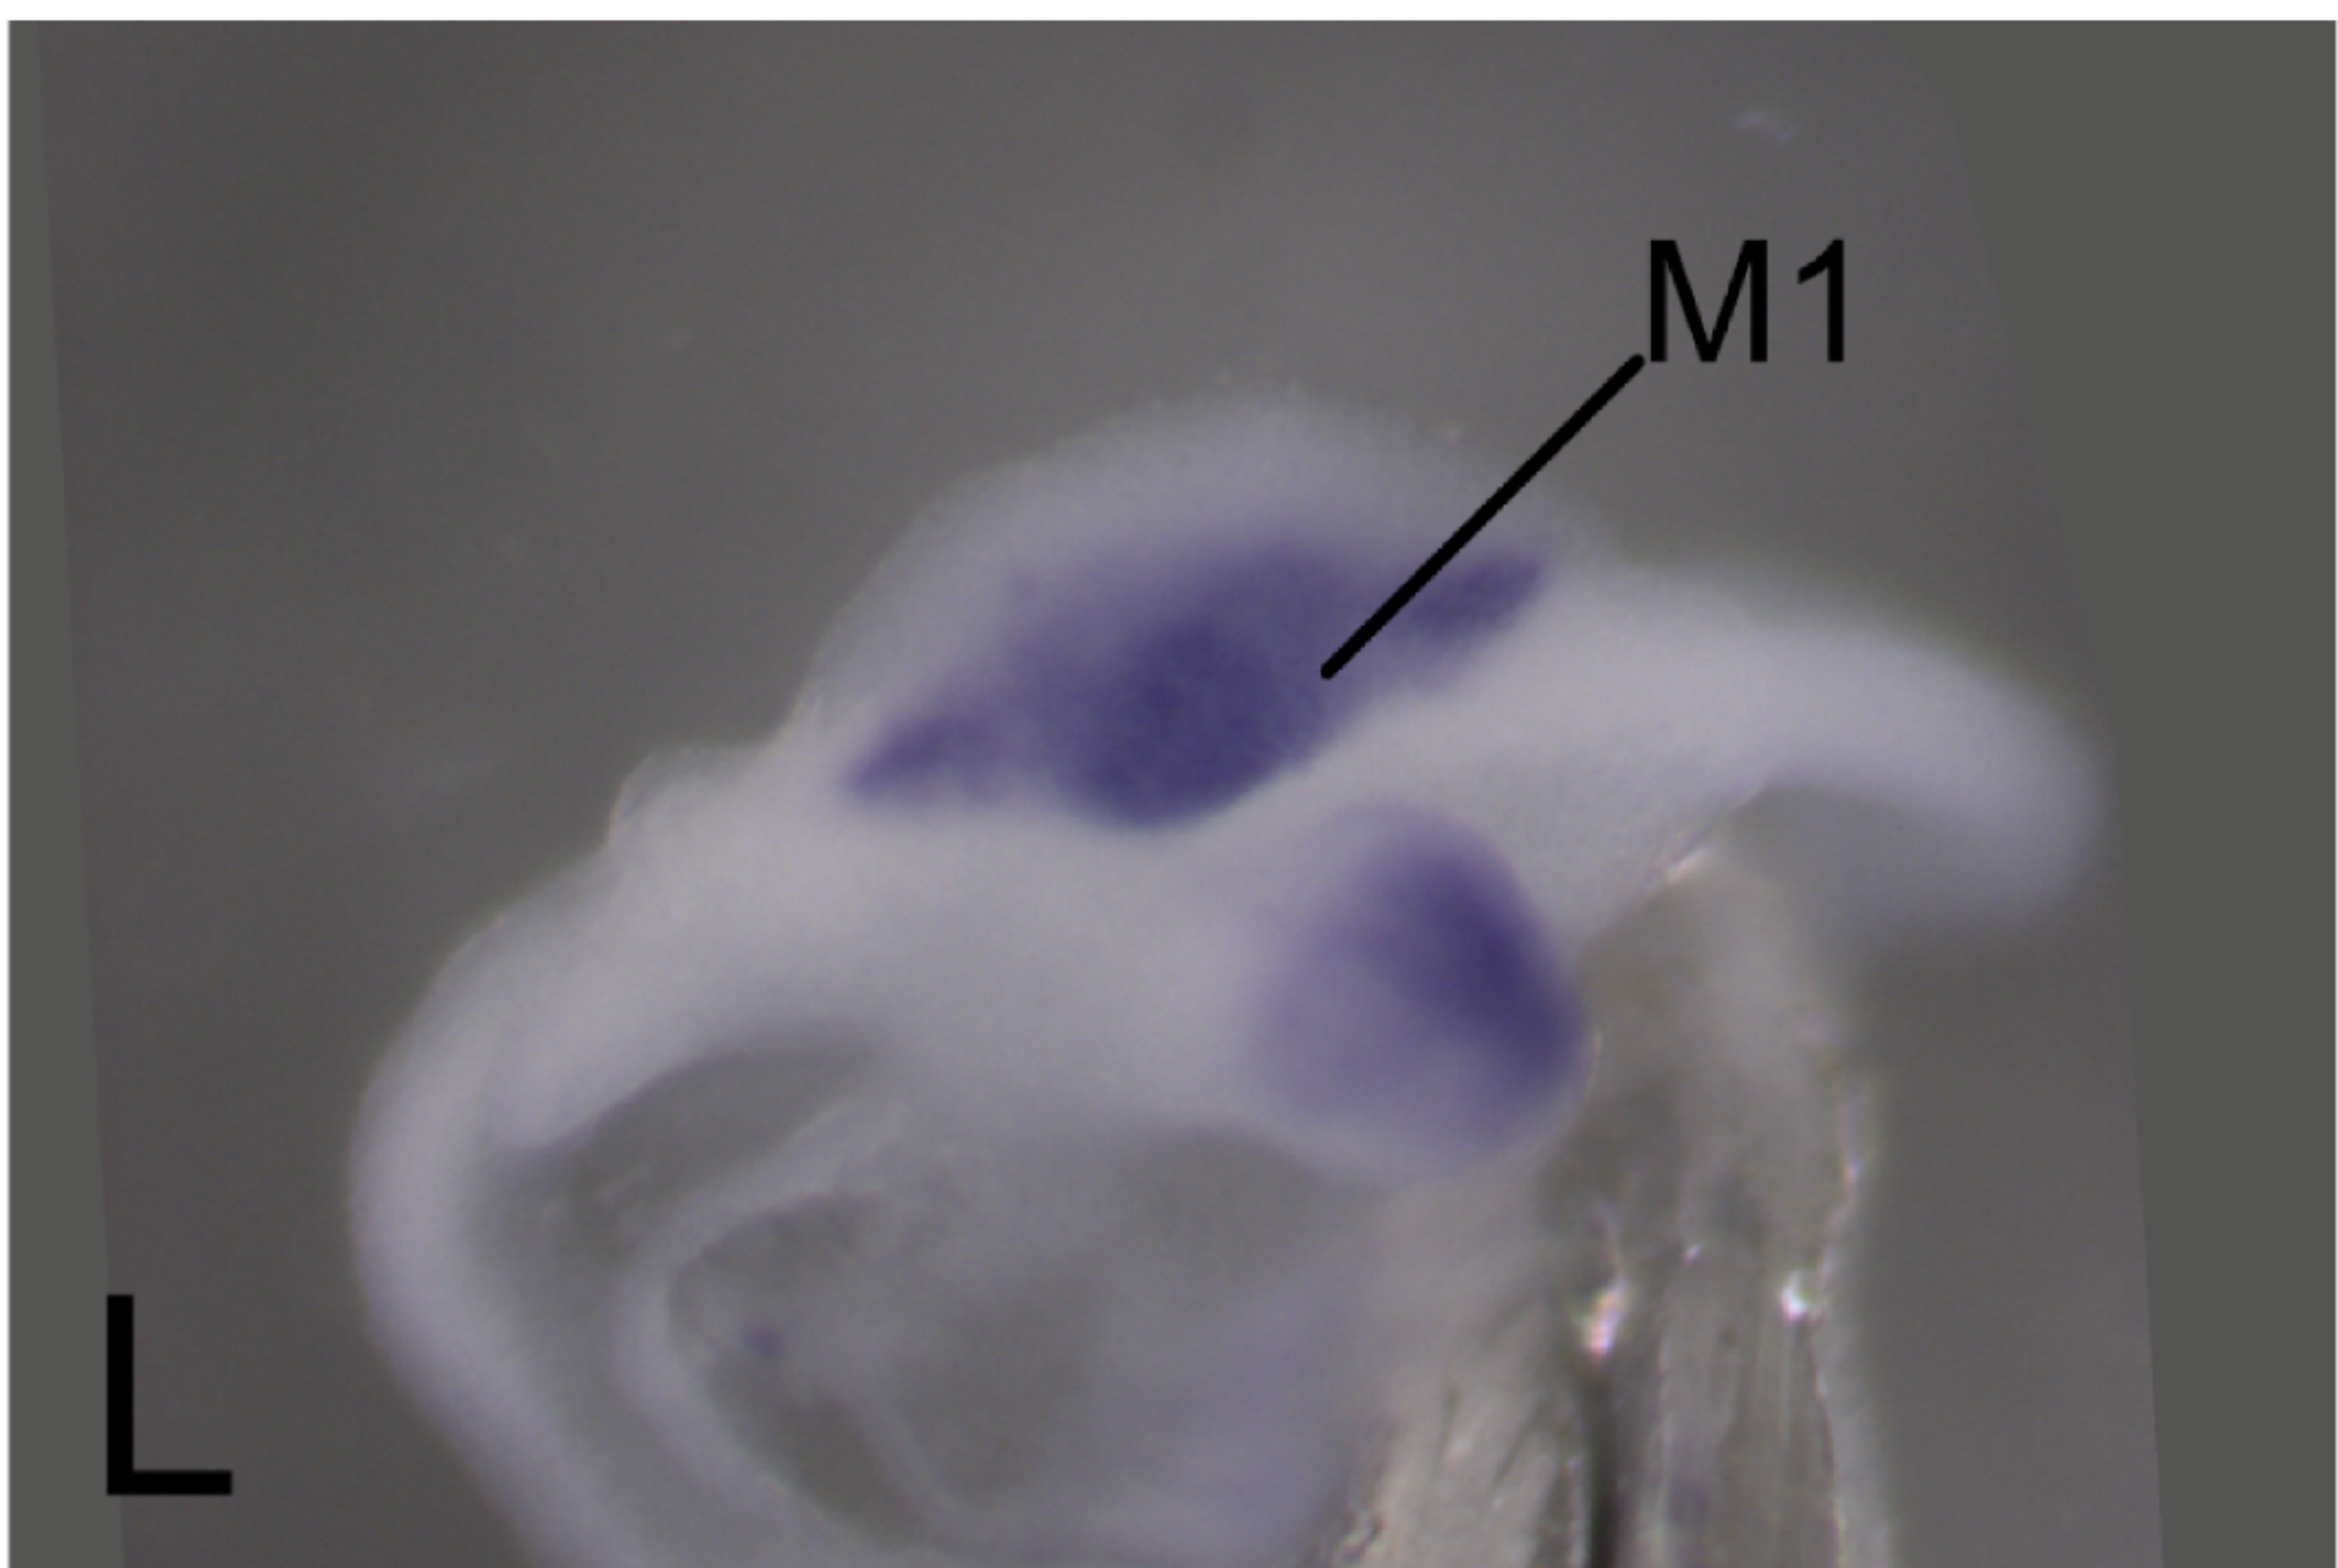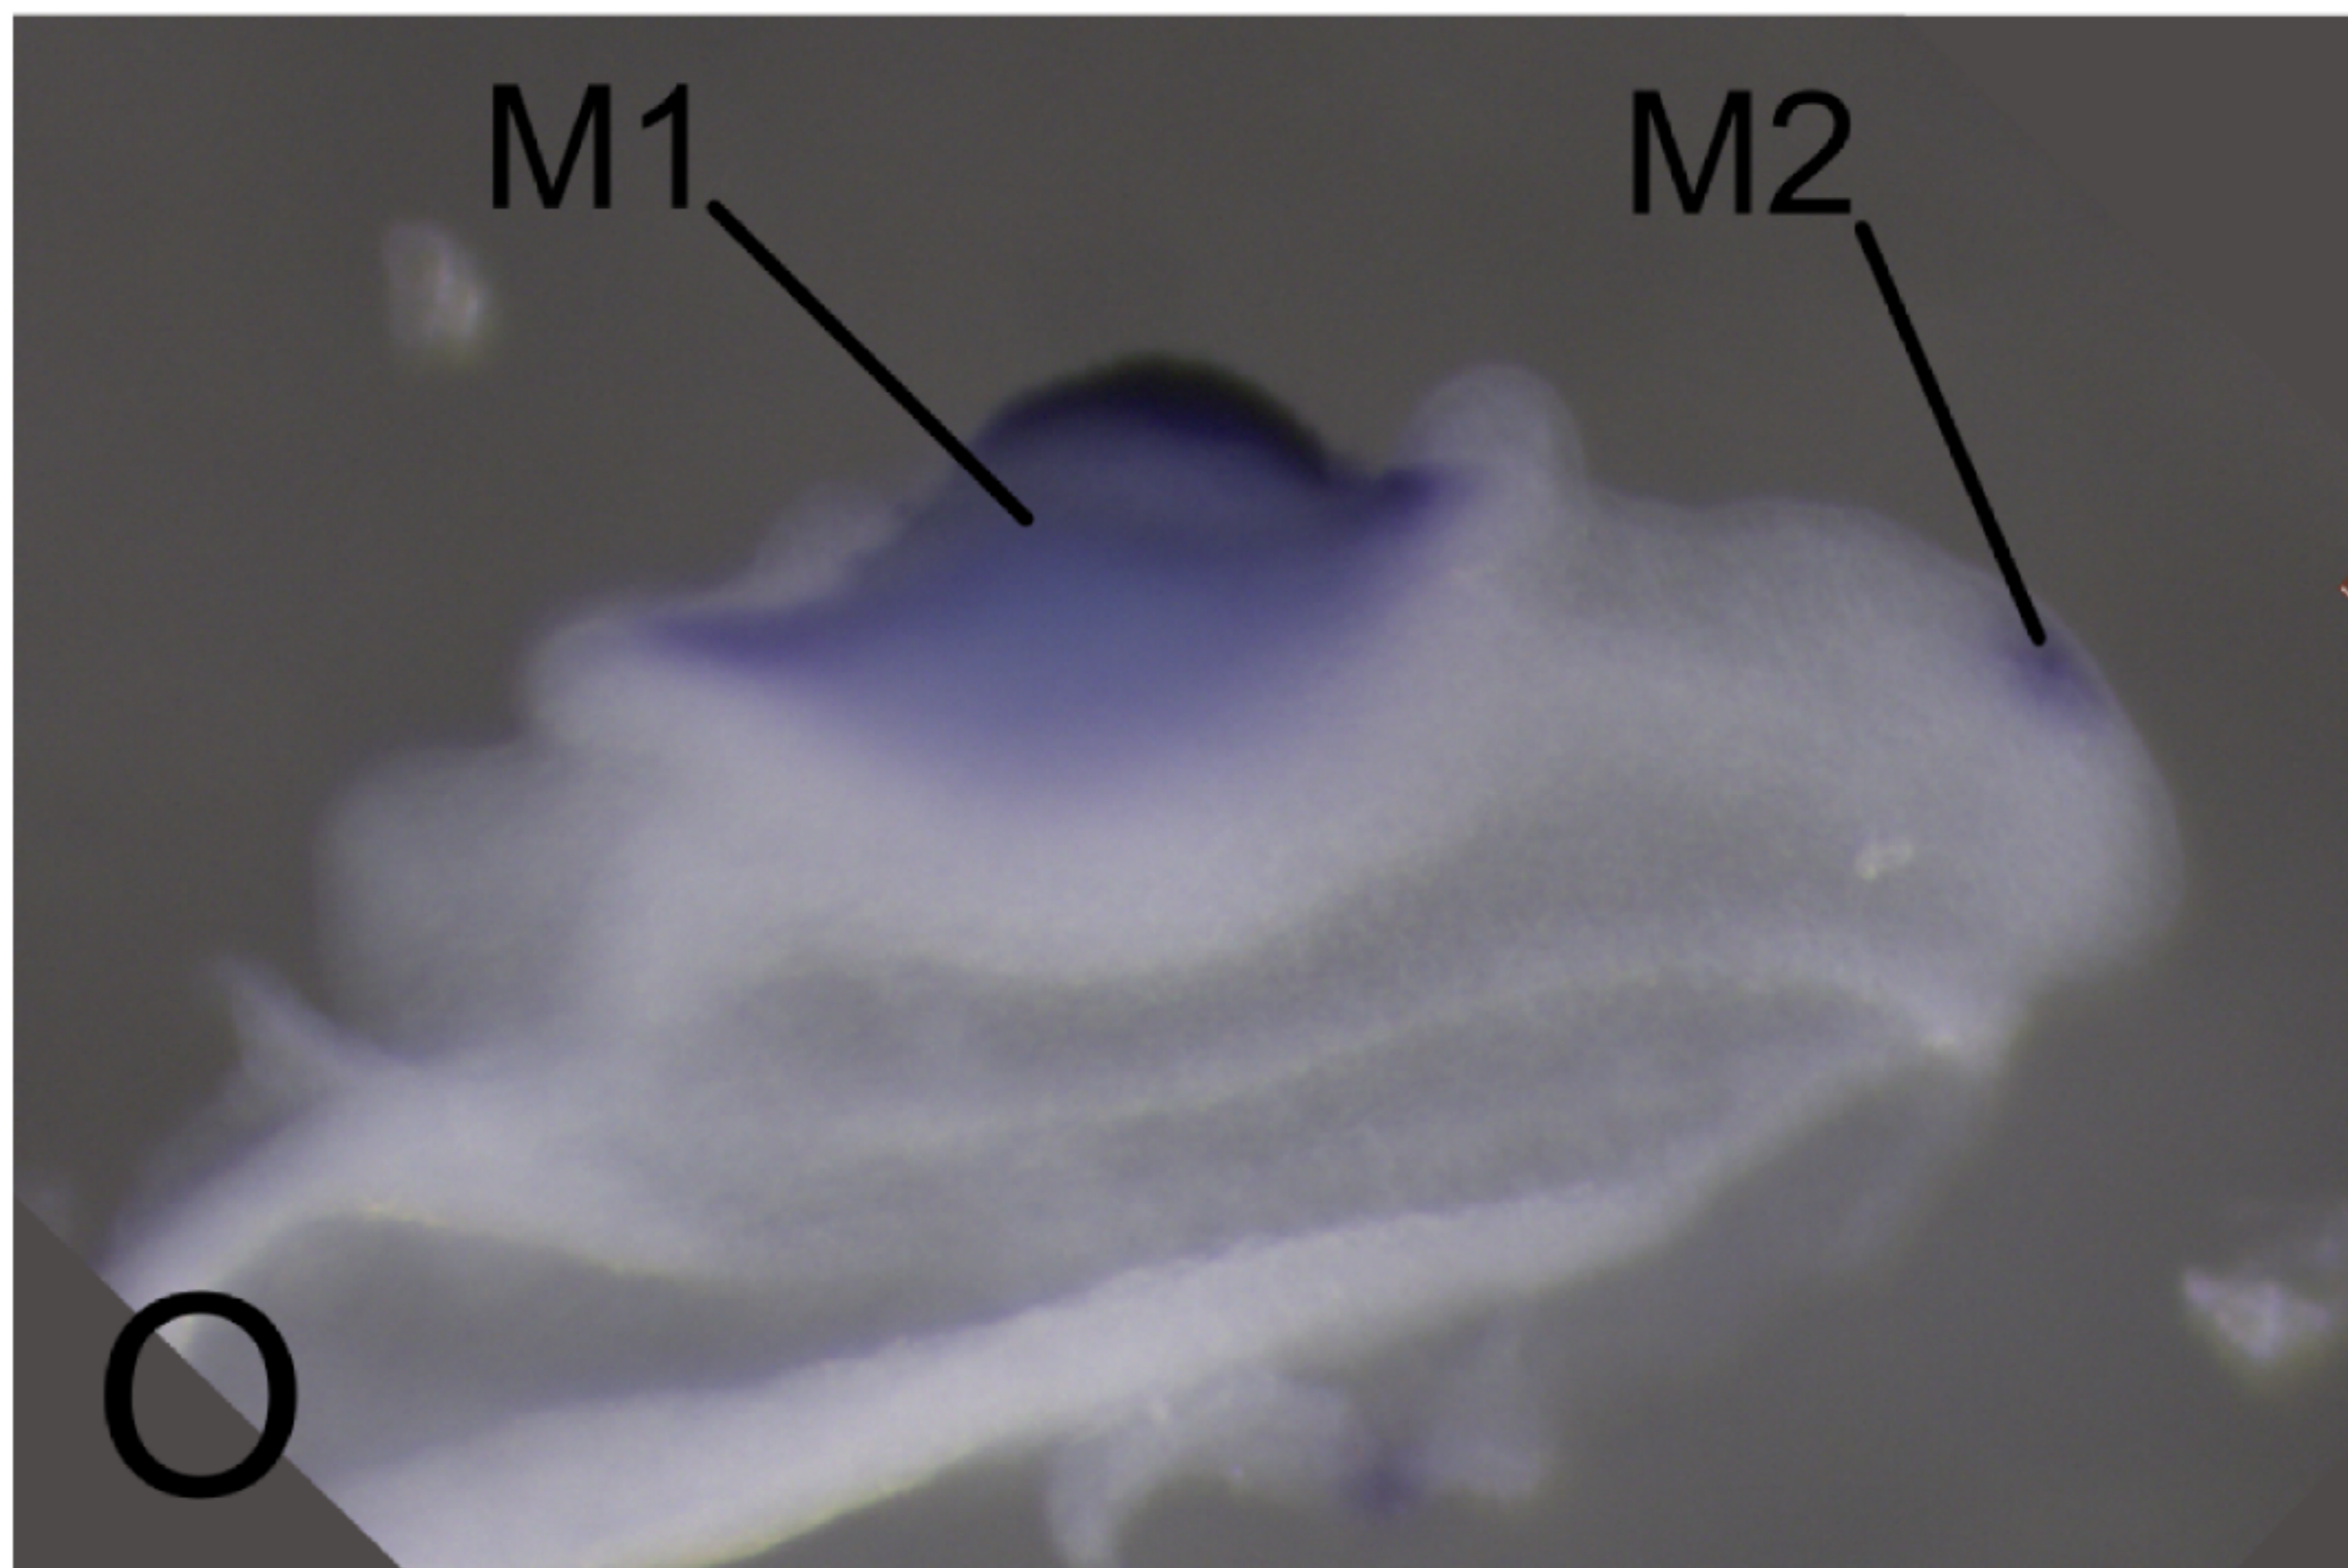

404mg

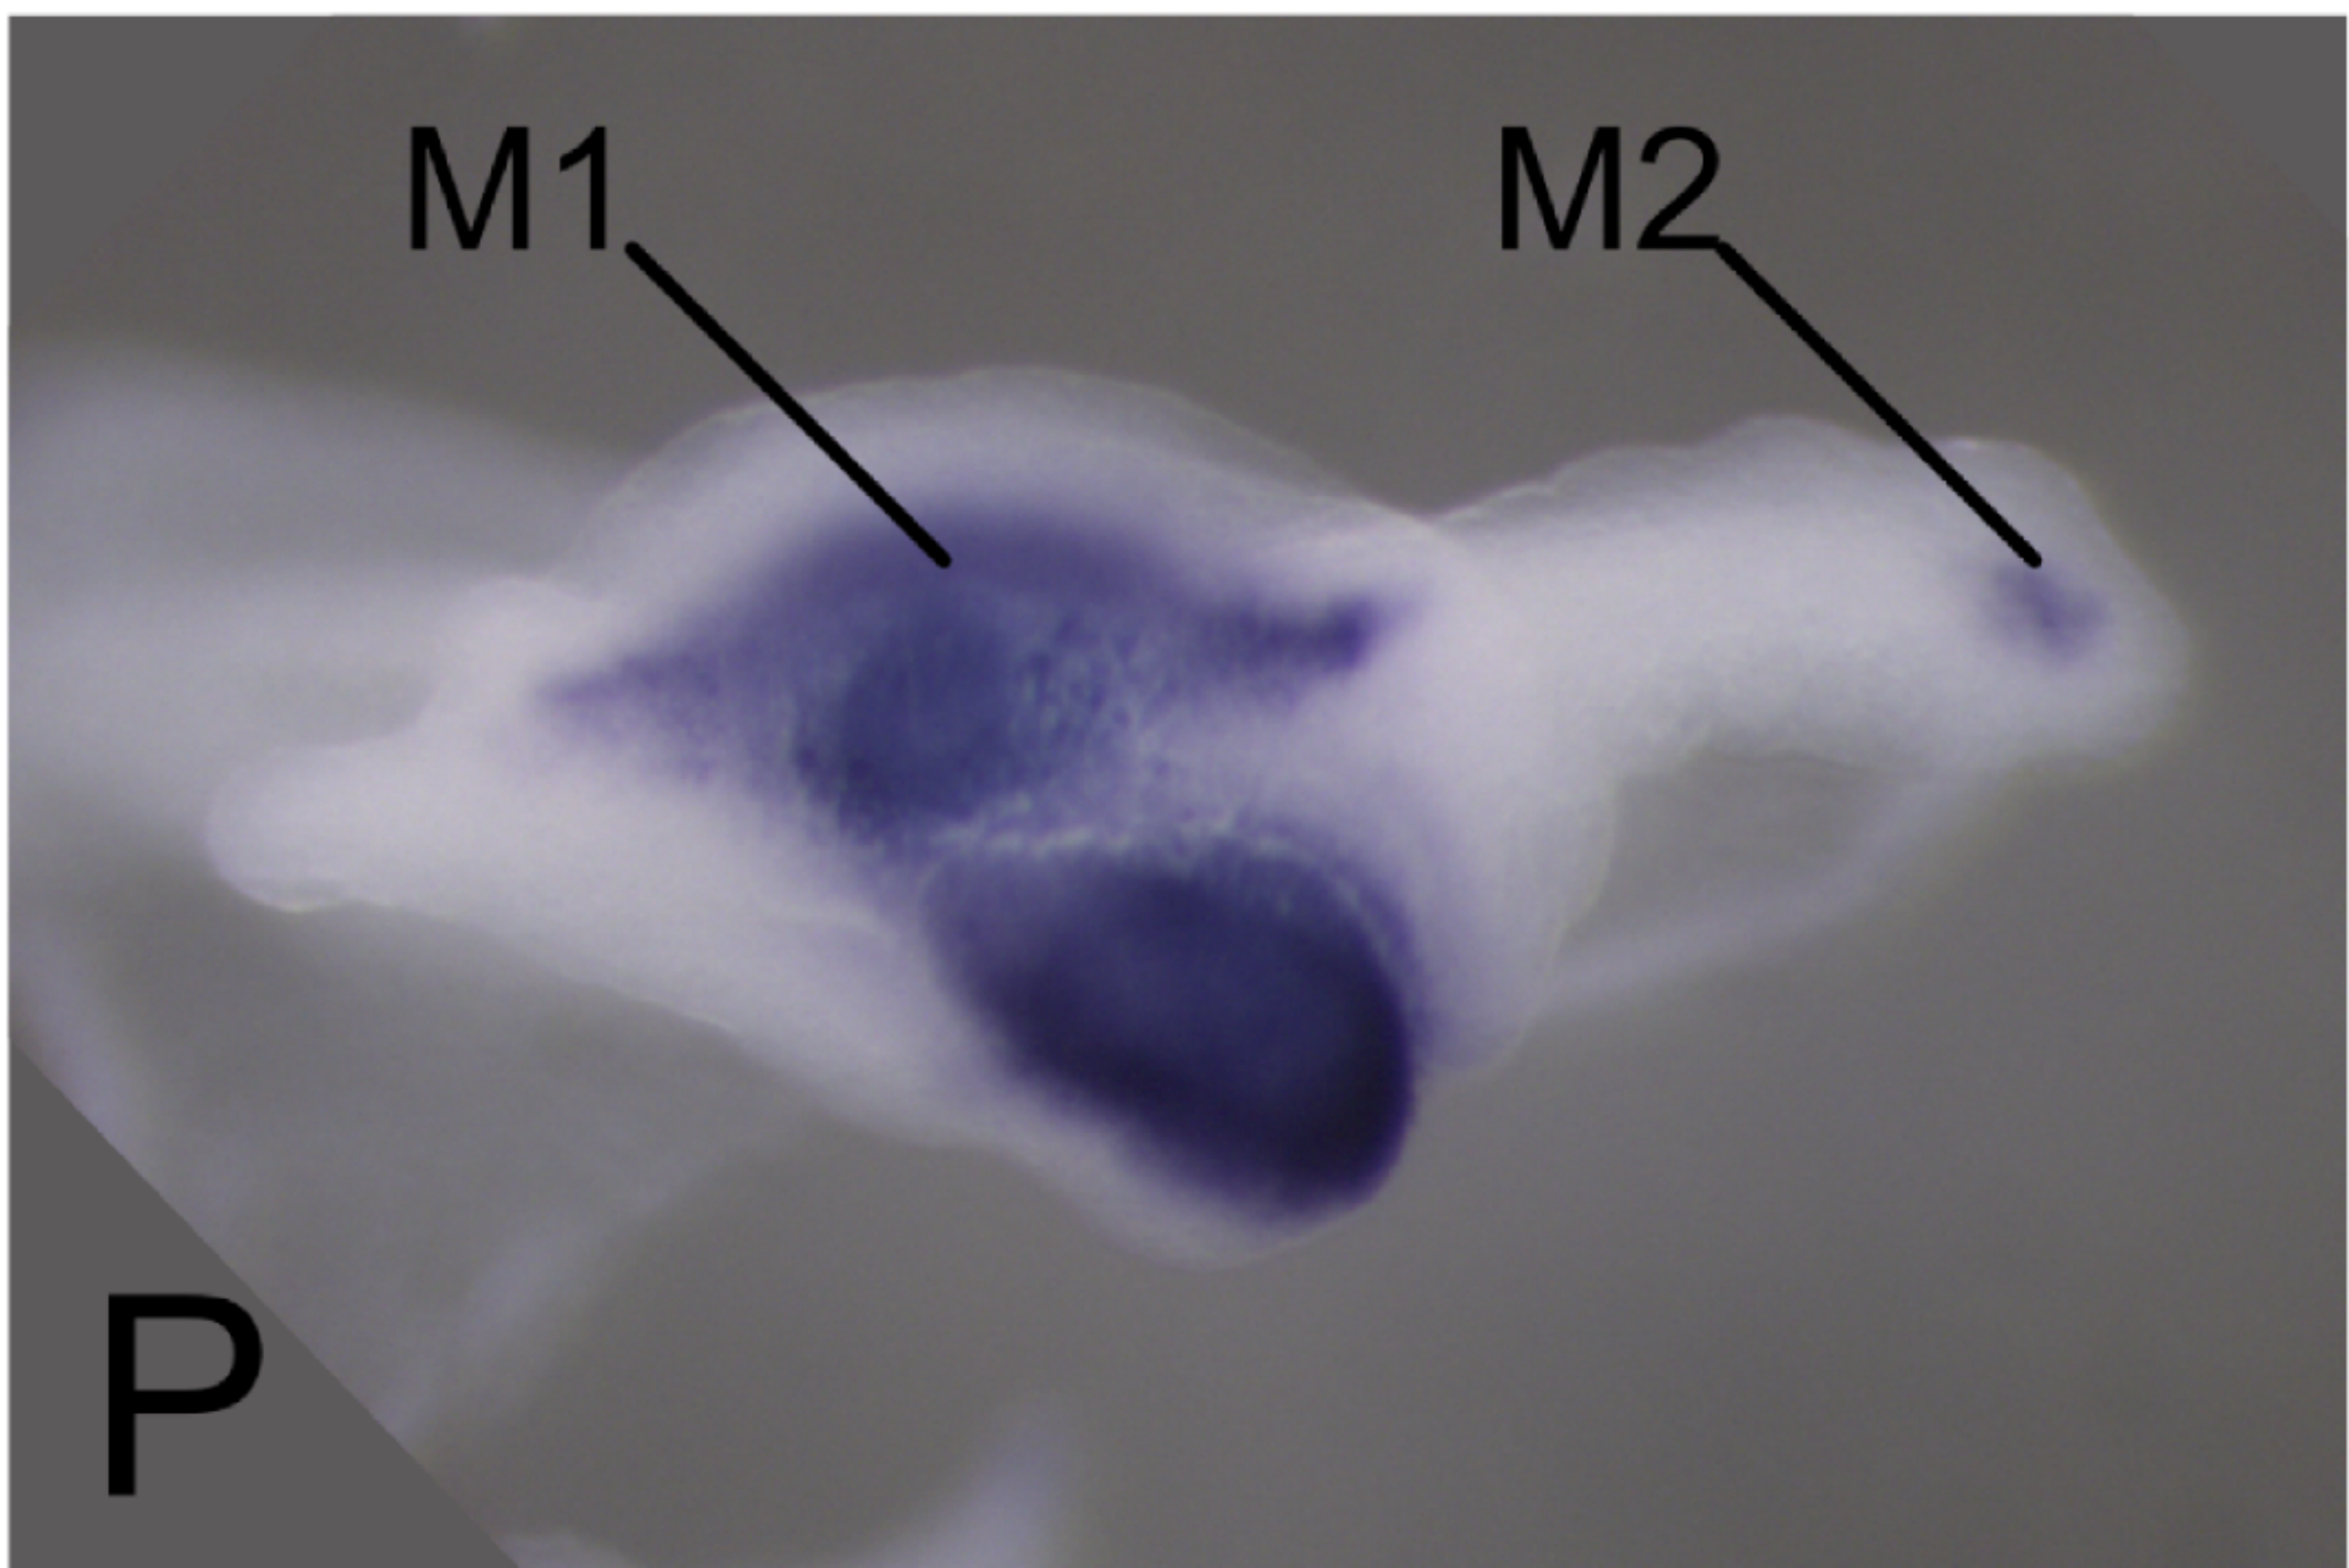

200  $\mu$ m

Supplement: supp [file elife-50103-supp-v1.zip › elife_poa_e50103_Figure_2_figure_supplement_2.pdf]

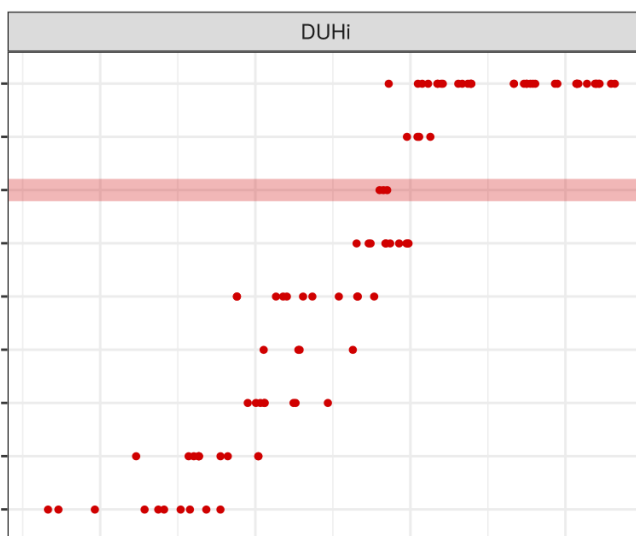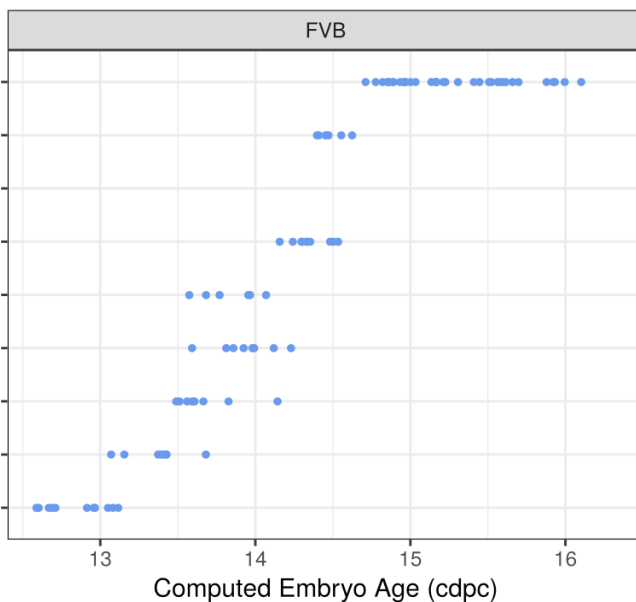

Supplement: supp [file elife_poa_e50103_Figure_3_figure_supplement_3.pdf › elife_poa_e50103_Figure_3_figure_supplement_3.pdf]
